# Supplementary material for: Deep generative modeling of the human proteome reveals over a hundred novel genes involved in rare genetic disorders
Source: Research Square preprint supplement (doi:10.21203/rs.3.rs-3740259/v1), 2024-01-03
Supplement: Supplementary file 1 [file 086b014fc8c8f350f0040331.xlsx]

## Sheet: Key
column	description
gene	Gene symbol
protein	RefSeq protein id
severe_denovo	Number of rare, de novo severe popEVE variants in DDD cohort
moderate_denovo	Number of rare, de novo moderate popEVE variants in DDD cohort
severe_inherited	Number of rare, inherited severe popEVE variants in DDD cohort
moderate_inherited	Number of rare, inherited moderate popEVE variants in DDD cohort
min_popEVE_denovo	Minimum popEVE score of de novo moderate to severe variants in DDD cohort
min_popEVE_inherited	Minimum popEVE score of inherited moderate to severe variants in DDD cohort
collapse_sig	Gene collapse significant (p<2.7e-6)
threshold_sig	Min popEVE score in cases below severe threshold (popEVE<=-5.056)
sig	Either collapse or threshold sig and not flagged
ukbb_flag	Fails to get 10x coverage in at least 95% of UKBB participants
pathogenic_flag	popEVE model pathogenicity is an outlier
constraint_flag	Gene fails DeNovoWEST mutation rate background constraint check
ddg2p	Gene is in DDG2P database, known developmental disorder gene
dnw	Gene is significant in DeNovoWEST analysis
dnw_missense	Gene is significant in DeNovoWEST analysis with missense variants only
known	Gene is known either in DDG2P or labels from the three metacohort centers

## Sheet: SuppTable08
gene	protein	severe_denovo	moderate_denovo	severe_inherited	moderate_inherited	min_popEVE_denovo	min_popEVE_inherited	collapse_sig	threshold_sig	sig	ukbb_flag	pathogenic_flag	constraint_flag	ddg2p	dnw	dnw_missense	known
ABCF1	NP_001020262.1	0	1	0	0	-4.686		FALSE	FALSE	FALSE	FALSE	FALSE	FALSE	FALSE	FALSE	FALSE	FALSE
ABCF2	NP_009120.1	0	1	0	1	-4.654	-4.6755	FALSE	FALSE	FALSE	FALSE	FALSE	FALSE	FALSE	FALSE	FALSE	FALSE
ABCF2-H2BK1	NP_005683.2	0	1	0	2	-4.674	-4.6275	FALSE	FALSE	FALSE	FALSE	FALSE	FALSE	FALSE	FALSE	FALSE	FALSE
ACTC1	NP_005150.1	1	1	1	3	-5.8165	-5.6445	FALSE	TRUE	TRUE	FALSE	FALSE	FALSE	FALSE	FALSE	FALSE	FALSE
ACTL6A	NP_004292.1	1	0	0	0	-5.2795		FALSE	TRUE	TRUE	FALSE	FALSE	FALSE	FALSE	FALSE	FALSE	TRUE
ADNP	NP_852107.1	2	0	0	5	-5.868	-4.774	TRUE	TRUE	TRUE	FALSE	FALSE	FALSE	TRUE	TRUE	FALSE	TRUE
AGBL5	NP_068603.4	0	1	0	0	-4.6925		FALSE	FALSE	FALSE	FALSE	FALSE	FALSE	FALSE	FALSE	FALSE	FALSE
AGO1	NP_036331.1	1	0	2	1	-6.631	-6.03	TRUE	TRUE	TRUE	FALSE	FALSE	FALSE	TRUE	TRUE	TRUE	TRUE
AGPAT3	NP_001032642.1	0	1	0	1	-4.8845	-4.732	FALSE	FALSE	FALSE	FALSE	FALSE	FALSE	FALSE	FALSE	FALSE	FALSE
ALCAM	NP_001618.2	1	0	1	0	-5.0675	-5.128	FALSE	TRUE	TRUE	FALSE	FALSE	FALSE	FALSE	FALSE	FALSE	FALSE
AP2B1	NP_001025177.1	0	1	0	1	-4.94	-4.969	FALSE	FALSE	FALSE	FALSE	FALSE	FALSE	FALSE	FALSE	FALSE	FALSE
AP2M1	NP_001298127.1	0	1	1	0	-4.698	-5.7525	FALSE	FALSE	FALSE	FALSE	FALSE	FALSE	TRUE	FALSE	FALSE	TRUE
ARF1	NP_001019397.1	0	1	0	1	-4.9385	-4.6775	TRUE	FALSE	TRUE	FALSE	FALSE	FALSE	TRUE	TRUE	TRUE	TRUE
ARHGEF9	NP_056000.1	1	0	0	4	-5.144	-4.9625	FALSE	TRUE	TRUE	FALSE	FALSE	FALSE	TRUE	FALSE	FALSE	TRUE
ARIH1	NP_005735.2	1	1	2	1	-5.566	-5.6225	FALSE	TRUE	TRUE	FALSE	FALSE	FALSE	FALSE	FALSE	FALSE	FALSE
ARL1	NP_001168.1	1	0	0	0	-5.282		FALSE	TRUE	TRUE	FALSE	FALSE	FALSE	FALSE	FALSE	FALSE	FALSE
ASIC2	NP_899233.1	0	1	0	0	-4.651		FALSE	FALSE	FALSE	FALSE	FALSE	FALSE	FALSE	FALSE	FALSE	FALSE
ATAD2B	NP_001341036.1	0	1	0	1	-4.7215	-4.923	FALSE	FALSE	FALSE	FALSE	FALSE	FALSE	FALSE	FALSE	FALSE	FALSE
ATP1A1	NP_001153705.1	1	0	1	0	-6.5765	-5.473	FALSE	TRUE	TRUE	FALSE	FALSE	FALSE	TRUE	FALSE	FALSE	TRUE
ATP1A2	NP_000693.1	0	2	0	0	-5.143		TRUE	TRUE	TRUE	FALSE	FALSE	FALSE	TRUE	FALSE	FALSE	TRUE
ATP1A3	NP_689509.1	2	1	3	2	-6.0025	-5.339	TRUE	TRUE	TRUE	FALSE	FALSE	FALSE	TRUE	TRUE	TRUE	TRUE
ATP2B1	NP_001673.2	1	0	0	3	-5.66	-4.9355	FALSE	TRUE	TRUE	FALSE	FALSE	FALSE	TRUE	FALSE	FALSE	TRUE
ATP5F1A	NP_001001937.1	0	1	0	0	-4.863		FALSE	FALSE	FALSE	FALSE	FALSE	FALSE	TRUE	FALSE	FALSE	TRUE
ATP5F1B	NP_001677.2	0	1	0	0	-5.09		FALSE	TRUE	TRUE	FALSE	FALSE	FALSE	FALSE	FALSE	FALSE	FALSE
ATP6V0A1	NP_001123492.1	0	4	0	0	-5.0155		TRUE	FALSE	TRUE	FALSE	FALSE	FALSE	TRUE	TRUE	TRUE	TRUE
ATP6V1A	NP_001681.2	2	0	1	6	-5.488	-5.3485	TRUE	TRUE	TRUE	FALSE	FALSE	FALSE	TRUE	TRUE	TRUE	TRUE
ATP6V1B2	NP_001684.2	0	1	0	2	-5.015	-4.972	FALSE	FALSE	FALSE	FALSE	FALSE	FALSE	TRUE	FALSE	FALSE	TRUE
BAP1	NP_004647.1	0	1	0	0	-4.7445		FALSE	FALSE	FALSE	FALSE	FALSE	FALSE	TRUE	FALSE	FALSE	TRUE
BCL11A	NP_075044.2	1	0	0	0	-5.073		FALSE	TRUE	TRUE	FALSE	FALSE	FALSE	TRUE	TRUE	TRUE	TRUE
BCL2L2-PABPN1	NP_001374269.1	0	1	0	2	-4.7915	-4.7915	FALSE	FALSE	FALSE	FALSE	FALSE	FALSE	FALSE	FALSE	FALSE	FALSE
BRAF	NP_004324.2	2	5	0	1	-5.872	-4.691	TRUE	TRUE	TRUE	FALSE	FALSE	FALSE	TRUE	TRUE	TRUE	TRUE
C1GALT1C1	NP_001011551.1	1	0	0	2	-5.3415	-4.9625	FALSE	TRUE	TRUE	FALSE	FALSE	FALSE	FALSE	FALSE	FALSE	FALSE
CACNA1A	NP_001120693.1	6	1	1	2	-5.5695	-5.5975	TRUE	TRUE	TRUE	FALSE	FALSE	FALSE	TRUE	TRUE	TRUE	TRUE
CACNA1C	NP_000710.5	2	1	5	0	-6.812	-5.483	TRUE	TRUE	TRUE	FALSE	FALSE	FALSE	TRUE	TRUE	TRUE	TRUE
CACNA1D	NP_000711.1	1	0	1	2	-5.165	-5.873	FALSE	TRUE	TRUE	FALSE	FALSE	FALSE	TRUE	FALSE	FALSE	TRUE
CACNA1E	NP_000712.2	3	1	3	6	-6.601	-5.8145	TRUE	TRUE	TRUE	FALSE	FALSE	FALSE	TRUE	TRUE	TRUE	TRUE
CADM1	NP_055148.3	0	1	0	1	-4.698	-4.8045	FALSE	FALSE	FALSE	FALSE	FALSE	FALSE	FALSE	FALSE	FALSE	FALSE
CAMK2A	NP_741960.1	0	1	0	0	-6.421		TRUE	TRUE	TRUE	FALSE	FALSE	FALSE	TRUE	FALSE	FALSE	TRUE
CAPZA2	NP_006127.1	1	0	0	0	-5.307		FALSE	TRUE	TRUE	FALSE	FALSE	FALSE	FALSE	FALSE	FALSE	FALSE
CBX5	NP_036249.1	1	0	0	3	-5.6075	-4.962	TRUE	TRUE	TRUE	FALSE	FALSE	FALSE	FALSE	FALSE	FALSE	FALSE
CD274	NP_054862.1	0	1	0	0	-4.725		FALSE	FALSE	FALSE	FALSE	FALSE	FALSE	FALSE	FALSE	FALSE	FALSE
CDC42BPB	NP_006026.3	1	0	0	2	-5.2475	-5.052	FALSE	TRUE	TRUE	FALSE	FALSE	FALSE	TRUE	FALSE	FALSE	TRUE
CDK13	NP_003709.3	2	14	0	1	-5.181	-4.754	TRUE	TRUE	TRUE	FALSE	FALSE	FALSE	TRUE	TRUE	TRUE	TRUE
CDK8	NP_001251.1	2	0	0	0	-5.754		TRUE	TRUE	TRUE	FALSE	FALSE	FALSE	TRUE	TRUE	TRUE	TRUE
CERT1	NP_001123577.1	0	6	0	0	-4.927		TRUE	FALSE	TRUE	FALSE	FALSE	FALSE	TRUE	TRUE	TRUE	TRUE
CHD1	NP_001261.2	1	0	0	1	-5.9145	-4.755	FALSE	TRUE	TRUE	FALSE	FALSE	FALSE	TRUE	FALSE	FALSE	TRUE
CHD2	NP_001262.3	4	0	1	0	-6.1505	-5.2245	TRUE	TRUE	TRUE	FALSE	FALSE	FALSE	TRUE	TRUE	TRUE	TRUE
CHD3	NP_001005271.2	9	1	1	3	-5.927	-5.259	TRUE	TRUE	TRUE	FALSE	FALSE	FALSE	TRUE	TRUE	TRUE	TRUE
CHD4	NP_001264.2	3	0	0	4	-6.6515	-4.9775	TRUE	TRUE	TRUE	FALSE	FALSE	FALSE	TRUE	TRUE	TRUE	TRUE
CHMP4B	NP_789782.1	0	1	0	0	-4.903		FALSE	FALSE	FALSE	FALSE	FALSE	FALSE	FALSE	FALSE	FALSE	FALSE
CLASP1	NP_056097.1	1	0	0	4	-5.361	-4.926	FALSE	TRUE	TRUE	FALSE	FALSE	FALSE	FALSE	FALSE	FALSE	FALSE
CLCN4	NP_001821.2	2	0	1	1	-5.461	-5.0655	TRUE	TRUE	TRUE	FALSE	FALSE	FALSE	TRUE	TRUE	TRUE	TRUE
CLCN6	NP_001277.2	0	1	0	0	-4.9375		FALSE	FALSE	FALSE	FALSE	FALSE	FALSE	TRUE	FALSE	FALSE	TRUE
CLDN5	NP_001124333.1	1	0	0	0	-5.465		FALSE	TRUE	TRUE	FALSE	FALSE	FALSE	TRUE	FALSE	FALSE	TRUE
CLTC	NP_001275582.1	1	2	0	2	-5.3645	-5.004	TRUE	TRUE	TRUE	FALSE	FALSE	FALSE	TRUE	TRUE	TRUE	TRUE
CNOT3	NP_055331.1	1	1	0	1	-5.2435	-4.8335	TRUE	TRUE	TRUE	FALSE	FALSE	FALSE	TRUE	TRUE	TRUE	TRUE
CNOT9	NP_001258563.1	0	1	0	0	-4.676		FALSE	FALSE	FALSE	FALSE	FALSE	FALSE	FALSE	FALSE	FALSE	FALSE
COL2A1	NP_001835.3	2	1	1	1	-5.281	-5.3025	TRUE	TRUE	TRUE	FALSE	FALSE	FALSE	TRUE	TRUE	FALSE	TRUE
COL3A1	NP_000081.2	1	0	4	1	-5.5355	-5.3005	TRUE	TRUE	TRUE	FALSE	FALSE	FALSE	FALSE	FALSE	FALSE	FALSE
CSF2RB	NP_000386.1	0	1	0	1	-4.646	-4.646	FALSE	FALSE	FALSE	FALSE	FALSE	FALSE	FALSE	FALSE	FALSE	FALSE
CSNK2A1	NP_001349700.1	4	3	0	0	-5.7255		TRUE	TRUE	TRUE	FALSE	FALSE	FALSE	TRUE	TRUE	TRUE	TRUE
CSNK2B	NP_001311.3	0	1	0	1	-5.002	-4.895	TRUE	FALSE	TRUE	FALSE	FALSE	FALSE	TRUE	TRUE	TRUE	TRUE
CTCF	NP_006556.1	8	0	3	1	-5.633	-5.4645	TRUE	TRUE	TRUE	FALSE	FALSE	FALSE	TRUE	TRUE	TRUE	TRUE
CTNNA1	NP_001894.2	0	1	1	0	-4.8995	-5.096	FALSE	FALSE	FALSE	FALSE	FALSE	FALSE	FALSE	FALSE	FALSE	FALSE
CUX1	NP_001189472.1	1	0	0	0	-5.239		FALSE	TRUE	TRUE	FALSE	FALSE	FALSE	TRUE	FALSE	FALSE	TRUE
DCAF5	NP_003852.1	1	0	0	0	-5.747		FALSE	TRUE	TRUE	FALSE	FALSE	FALSE	FALSE	FALSE	FALSE	FALSE
DCAF7	NP_005819.3	0	1	1	0	-4.832	-5.3965	TRUE	FALSE	TRUE	FALSE	FALSE	FALSE	FALSE	FALSE	FALSE	FALSE
DCX	NP_835366.1	1	0	1	0	-5.379	-5.331	FALSE	TRUE	TRUE	FALSE	FALSE	FALSE	TRUE	FALSE	FALSE	TRUE
DDX19B	NP_009173.1	0	1	0	0	-4.9085		FALSE	FALSE	FALSE	FALSE	FALSE	FALSE	FALSE	FALSE	FALSE	FALSE
DDX23	NP_004809.2	0	3	0	0	-5.028		TRUE	FALSE	TRUE	FALSE	FALSE	FALSE	TRUE	TRUE	TRUE	TRUE
DDX39B	NP_004631.1	0	1	0	1	-4.6725	-5.052	FALSE	FALSE	FALSE	FALSE	FALSE	FALSE	FALSE	FALSE	FALSE	FALSE
DDX3X	NP_001180345.1	23	3	4	3	-6.687	-6.042	TRUE	TRUE	TRUE	FALSE	FALSE	FALSE	TRUE	TRUE	TRUE	TRUE
DDX42	NP_031398.2	1	0	0	0	-5.2405		FALSE	TRUE	TRUE	FALSE	FALSE	FALSE	FALSE	FALSE	FALSE	FALSE
DDX46	NP_001287789.1	1	0	0	1	-5.2065	-4.7205	FALSE	TRUE	TRUE	FALSE	FALSE	FALSE	FALSE	FALSE	FALSE	FALSE
DHDDS	NP_079163.2	0	1	0	0	-4.7705		TRUE	FALSE	TRUE	FALSE	FALSE	FALSE	TRUE	TRUE	TRUE	TRUE
DHX30	NP_619520.1	5	0	1	3	-6.3035	-5.6685	TRUE	TRUE	TRUE	FALSE	FALSE	FALSE	TRUE	FALSE	FALSE	TRUE
DHX32	NP_060650.2	0	1	0	0	-4.7085		FALSE	FALSE	FALSE	FALSE	FALSE	FALSE	FALSE	FALSE	FALSE	FALSE
DHX36	NP_065916.2	0	1	0	0	-4.9435		FALSE	FALSE	FALSE	FALSE	FALSE	FALSE	FALSE	FALSE	FALSE	FALSE
DHX9	NP_001348.2	1	0	0	3	-5.599	-5.039	FALSE	TRUE	TRUE	FALSE	FALSE	FALSE	FALSE	FALSE	FALSE	FALSE
DNM1	NP_004399.2	6	3	1	0	-5.3545	-5.2145	TRUE	TRUE	TRUE	FALSE	FALSE	FALSE	TRUE	TRUE	TRUE	TRUE
DNM1L	NP_036192.2	1	0	0	0	-5.207		TRUE	TRUE	TRUE	FALSE	FALSE	FALSE	TRUE	TRUE	TRUE	TRUE
DNMT3A	NP_783328.1	0	1	0	0	-4.722		TRUE	FALSE	TRUE	FALSE	FALSE	FALSE	TRUE	TRUE	TRUE	TRUE
DPF2	NP_006259.1	1	1	0	0	-5.686		TRUE	TRUE	TRUE	FALSE	FALSE	FALSE	TRUE	TRUE	TRUE	TRUE
DRD2	NP_000786.1	0	1	0	0	-4.909		FALSE	FALSE	FALSE	FALSE	FALSE	FALSE	FALSE	FALSE	FALSE	FALSE
DSCAML1	NP_065744.3	1	0	0	0	-5.1		FALSE	TRUE	TRUE	FALSE	FALSE	FALSE	FALSE	FALSE	FALSE	FALSE
DYRK1A	NP_001387.2	5	0	0	0	-6.1185		TRUE	TRUE	TRUE	FALSE	FALSE	FALSE	TRUE	TRUE	TRUE	TRUE
EBF3	NP_001005463.1	0	1	1	1	-5.5185	-5.1485	TRUE	TRUE	TRUE	FALSE	FALSE	FALSE	TRUE	TRUE	TRUE	TRUE
EEF1A2	NP_001949.1	2	5	1	0	-5.498	-6.05	TRUE	TRUE	TRUE	FALSE	FALSE	FALSE	TRUE	TRUE	TRUE	TRUE
EEF2	NP_001952.1	0	1	3	0	-4.7955	-5.7355	TRUE	FALSE	FALSE	FALSE	FALSE	TRUE	TRUE	FALSE	FALSE	TRUE
EFTUD2	NP_004238.3	0	3	0	1	-5.42	-4.8415	TRUE	TRUE	TRUE	FALSE	FALSE	FALSE	TRUE	TRUE	TRUE	TRUE
EGR3	NP_004421.2	1	0	0	0	-5.769		TRUE	TRUE	TRUE	FALSE	FALSE	FALSE	FALSE	FALSE	FALSE	FALSE
EHMT1	NP_079033.4	1	1	1	0	-5.4345	-5.2685	TRUE	TRUE	TRUE	FALSE	FALSE	FALSE	TRUE	TRUE	FALSE	TRUE
EIF3I	NP_003748.1	0	1	0	2	-4.962	-4.8505	FALSE	FALSE	FALSE	FALSE	FALSE	FALSE	FALSE	FALSE	FALSE	FALSE
EIF4A2	NP_001958.2	1	1	3	0	-6.6425	-5.7965	FALSE	TRUE	TRUE	FALSE	FALSE	FALSE	FALSE	FALSE	FALSE	FALSE
EIF5A	NP_001137232.1	2	0	3	0	-5.7075	-5.965	FALSE	TRUE	TRUE	FALSE	FALSE	FALSE	TRUE	FALSE	FALSE	TRUE
ERF	NP_006485.2	0	1	0	1	-4.9565	-4.8595	TRUE	FALSE	TRUE	FALSE	FALSE	FALSE	TRUE	TRUE	FALSE	TRUE
ESRRG	NP_001429.2	0	1	1	2	-4.9395	-5.154	FALSE	FALSE	FALSE	FALSE	FALSE	FALSE	FALSE	FALSE	FALSE	FALSE
FBXL19	NP_001093254.2	0	1	0	1	-4.833	-4.863	FALSE	FALSE	FALSE	FALSE	FALSE	FALSE	FALSE	FALSE	FALSE	FALSE
FBXL3	NP_036290.1	1	0	0	0	-5.202		FALSE	TRUE	TRUE	FALSE	FALSE	FALSE	FALSE	FALSE	FALSE	FALSE
FBXO11	NP_001177203.1	1	1	1	0	-6.175	-5.4095	TRUE	TRUE	TRUE	FALSE	FALSE	FALSE	TRUE	TRUE	TRUE	TRUE
FBXW7	NP_361014.1	3	1	0	0	-5.9335		TRUE	TRUE	TRUE	FALSE	FALSE	FALSE	TRUE	TRUE	TRUE	TRUE
FGFR1	NP_075598.2	1	0	0	3	-5.5115	-4.8495	TRUE	TRUE	TRUE	FALSE	FALSE	FALSE	TRUE	FALSE	FALSE	TRUE
FGFR2	NP_000132.3	2	0	1	2	-5.46	-5.1765	TRUE	TRUE	TRUE	FALSE	FALSE	FALSE	TRUE	TRUE	TRUE	TRUE
FOXG1	NP_005240.3	7	0	4	0	-5.898	-5.8315	TRUE	TRUE	TRUE	FALSE	FALSE	FALSE	TRUE	TRUE	TRUE	TRUE
FOXP1	NP_116071.2	0	8	0	0	-5.05		TRUE	FALSE	TRUE	FALSE	FALSE	FALSE	TRUE	TRUE	TRUE	TRUE
FOXP2	NP_055306.1	1	1	0	0	-5.064		FALSE	TRUE	TRUE	FALSE	FALSE	FALSE	TRUE	TRUE	FALSE	TRUE
GABRA1	NP_000797.2	0	3	1	1	-5.725	-5.1325	TRUE	TRUE	TRUE	FALSE	FALSE	FALSE	TRUE	TRUE	TRUE	TRUE
GABRA3	NP_000799.1	0	1	0	1	-5.156	-4.7015	TRUE	TRUE	TRUE	FALSE	FALSE	FALSE	FALSE	FALSE	FALSE	TRUE
GABRB2	NP_068711.1	2	2	0	0	-5.577		TRUE	TRUE	TRUE	FALSE	FALSE	FALSE	TRUE	TRUE	TRUE	TRUE
GABRB3	NP_068712.1	1	1	0	0	-5.7355		TRUE	TRUE	TRUE	FALSE	FALSE	FALSE	TRUE	TRUE	TRUE	TRUE
GABRG2	NP_000807.2	0	1	0	0	-5.0345		TRUE	FALSE	TRUE	FALSE	FALSE	FALSE	TRUE	FALSE	FALSE	TRUE
GAS7	NP_958839.1	0	1	0	0	-4.944		FALSE	FALSE	FALSE	FALSE	FALSE	FALSE	FALSE	FALSE	FALSE	FALSE
GATAD2B	NP_065750.1	0	2	0	0	-4.924		FALSE	FALSE	FALSE	FALSE	FALSE	FALSE	TRUE	TRUE	FALSE	TRUE
GFUS	NP_001304712.1	1	0	0	0	-5.135		FALSE	TRUE	TRUE	FALSE	FALSE	FALSE	FALSE	FALSE	FALSE	FALSE
GMDS	NP_001491.1	0	1	0	0	-4.8545		FALSE	FALSE	FALSE	FALSE	FALSE	FALSE	FALSE	FALSE	FALSE	FALSE
GNAI1	NP_002060.4	1	2	0	0	-5.2355		TRUE	TRUE	TRUE	FALSE	FALSE	FALSE	TRUE	TRUE	TRUE	TRUE
GNAI2	NP_002061.1	1	0	0	0	-5.376		FALSE	TRUE	TRUE	FALSE	FALSE	FALSE	FALSE	FALSE	FALSE	FALSE
GNAO1	NP_066268.1	7	0	2	1	-6.839	-5.821	TRUE	TRUE	TRUE	FALSE	FALSE	FALSE	TRUE	TRUE	TRUE	TRUE
GNAS	NP_536350.2	0	1	0	1	-4.6555	-4.6445	TRUE	FALSE	TRUE	FALSE	FALSE	FALSE	TRUE	TRUE	TRUE	TRUE
GNB1	NP_002065.1	1	0	0	1	-5.6185	-4.6915	FALSE	TRUE	TRUE	FALSE	FALSE	FALSE	TRUE	TRUE	TRUE	TRUE
GRIN1	NP_015566.1	2	1	0	1	-5.6815	-4.633	TRUE	TRUE	TRUE	FALSE	FALSE	FALSE	TRUE	TRUE	TRUE	TRUE
GRIN2A	NP_000824.1	2	0	0	1	-5.5105	-4.6535	TRUE	TRUE	TRUE	FALSE	FALSE	FALSE	TRUE	TRUE	TRUE	TRUE
GRIN2B	NP_000825.2	14	9	1	0	-6.564	-5.5815	TRUE	TRUE	TRUE	FALSE	FALSE	FALSE	TRUE	TRUE	TRUE	TRUE
GSPT1	NP_001123478.2	0	1	1	0	-4.6625	-5.2455	FALSE	FALSE	FALSE	FALSE	FALSE	FALSE	FALSE	FALSE	FALSE	FALSE
GSPT2	NP_060564.2	1	0	0	1	-5.2435	-4.9015	FALSE	TRUE	TRUE	FALSE	FALSE	FALSE	TRUE	FALSE	FALSE	TRUE
H2AX	NP_002096.1	0	1	0	0	-4.88		FALSE	FALSE	FALSE	FALSE	FALSE	FALSE	FALSE	FALSE	FALSE	FALSE
H3-3A	NP_002098.1	2	1	0	0	-5.583		TRUE	TRUE	TRUE	FALSE	FALSE	FALSE	TRUE	TRUE	TRUE	TRUE
HDAC5	NP_001015053.1	0	1	0	0	-5.182		FALSE	TRUE	TRUE	FALSE	FALSE	FALSE	FALSE	FALSE	FALSE	FALSE
HEATR5B	NP_061897.1	0	1	0	4	-4.918	-4.964	FALSE	FALSE	FALSE	FALSE	FALSE	FALSE	FALSE	FALSE	FALSE	FALSE
HNRNPAB	NP_112556.2	0	1	0	0	-4.734		FALSE	FALSE	FALSE	FALSE	FALSE	FALSE	FALSE	FALSE	FALSE	FALSE
HNRNPK	NP_002131.2	2	1	0	0	-5.7805		TRUE	TRUE	TRUE	FALSE	FALSE	FALSE	TRUE	TRUE	FALSE	TRUE
HSD17B10	NP_004484.1	1	0	0	0	-5.8815		TRUE	TRUE	TRUE	FALSE	FALSE	FALSE	TRUE	FALSE	FALSE	TRUE
HSP90B1	NP_003290.1	0	1	0	2	-5.1465	-4.6375	FALSE	TRUE	TRUE	FALSE	FALSE	FALSE	FALSE	FALSE	FALSE	FALSE
IK	NP_006074.2	0	1	0	1	-4.873	-4.6475	FALSE	FALSE	FALSE	FALSE	FALSE	FALSE	FALSE	FALSE	FALSE	FALSE
ING1	NP_937861.1	1	0	0	0	-5.1135		FALSE	TRUE	TRUE	FALSE	FALSE	FALSE	FALSE	FALSE	FALSE	FALSE
IQSEC2	NP_001104595.1	1	5	2	2	-5.3095	-5.13	TRUE	TRUE	TRUE	FALSE	FALSE	FALSE	TRUE	TRUE	TRUE	TRUE
ITGA5	NP_002196.4	0	1	0	0	-5.0275		FALSE	FALSE	FALSE	FALSE	FALSE	FALSE	FALSE	FALSE	FALSE	FALSE
ITGB1	NP_002202.2	0	1	0	1	-4.9065	-4.7175	FALSE	FALSE	FALSE	FALSE	FALSE	FALSE	FALSE	FALSE	FALSE	FALSE
JADE2	NP_001276914.1	0	1	0	2	-4.7515	-4.9395	FALSE	FALSE	FALSE	FALSE	FALSE	FALSE	FALSE	FALSE	FALSE	FALSE
KCNB1	NP_004966.1	6	1	1	1	-5.5895	-5.2865	TRUE	TRUE	TRUE	FALSE	FALSE	FALSE	TRUE	TRUE	TRUE	TRUE
KCNC1	NP_001106212.1	0	1	0	1	-5.008	-4.9165	FALSE	FALSE	FALSE	FALSE	FALSE	FALSE	TRUE	FALSE	FALSE	TRUE
KCND3	NP_004971.2	2	0	0	1	-5.2715	-4.876	TRUE	TRUE	TRUE	FALSE	FALSE	FALSE	TRUE	TRUE	TRUE	TRUE
KCNH1	NP_758872.1	1	2	0	1	-5.083	-4.9485	TRUE	TRUE	TRUE	FALSE	FALSE	FALSE	TRUE	TRUE	TRUE	TRUE
KCNK3	NP_002237.1	1	0	0	0	-5.087		TRUE	TRUE	TRUE	FALSE	FALSE	FALSE	TRUE	TRUE	TRUE	TRUE
KCNMA1	NP_002238.2	1	1	0	2	-5.059	-5.0305	TRUE	TRUE	TRUE	FALSE	FALSE	FALSE	TRUE	FALSE	FALSE	TRUE
KCNN2	NP_001359162.1	1	0	0	0	-5.8465		FALSE	TRUE	TRUE	FALSE	FALSE	FALSE	FALSE	FALSE	FALSE	FALSE
KCNQ2	NP_742105.1	13	5	2	2	-6.328	-6.049	TRUE	TRUE	TRUE	FALSE	FALSE	FALSE	TRUE	TRUE	TRUE	TRUE
KDM5C	NP_004178.2	1	1	3	2	-6.144	-5.533	TRUE	TRUE	TRUE	FALSE	FALSE	FALSE	TRUE	TRUE	TRUE	TRUE
KDM6B	NP_001073893.1	3	0	3	0	-6.049	-6.3005	TRUE	TRUE	FALSE	FALSE	FALSE	TRUE	TRUE	TRUE	FALSE	TRUE
KIF1A	NP_004312.2	15	1	1	1	-5.988	-5.3575	TRUE	TRUE	TRUE	FALSE	FALSE	FALSE	TRUE	TRUE	TRUE	TRUE
KIF5B	NP_004512.1	1	0	0	1	-5.3745	-4.8605	FALSE	TRUE	TRUE	FALSE	FALSE	FALSE	FALSE	FALSE	FALSE	FALSE
KIF5C	NP_004513.1	1	3	0	2	-5.5415	-4.8905	TRUE	TRUE	TRUE	FALSE	FALSE	FALSE	TRUE	TRUE	TRUE	TRUE
KMT5B	NP_001356355.1	2	0	1	3	-5.719	-5.5215	TRUE	TRUE	TRUE	FALSE	FALSE	FALSE	TRUE	TRUE	FALSE	TRUE
KPNA1	NP_002255.3	0	1	2	1	-4.694	-5.153	FALSE	FALSE	FALSE	FALSE	FALSE	FALSE	FALSE	FALSE	FALSE	FALSE
L1CAM	NP_000416.1	0	1	0	2	-5.0075	-4.7375	FALSE	FALSE	FALSE	FALSE	FALSE	FALSE	TRUE	FALSE	FALSE	TRUE
LHX5	NP_071758.1	1	0	0	0	-5.2565		FALSE	TRUE	TRUE	FALSE	FALSE	FALSE	FALSE	FALSE	FALSE	FALSE
LMBRD2	NP_001007528.1	0	1	3	0	-4.812	-5.3375	FALSE	FALSE	FALSE	FALSE	FALSE	FALSE	TRUE	FALSE	FALSE	TRUE
LTA	NP_000586.2	0	1	0	1	-4.768	-5.01	FALSE	FALSE	FALSE	FALSE	FALSE	FALSE	FALSE	FALSE	FALSE	FALSE
MAP2K1	NP_002746.1	0	1	2	1	-4.9225	-5.5995	TRUE	FALSE	TRUE	FALSE	FALSE	FALSE	TRUE	TRUE	TRUE	TRUE
MAP3K7	NP_663304.1	1	0	2	0	-5.3985	-5.272	TRUE	TRUE	TRUE	FALSE	FALSE	FALSE	TRUE	TRUE	TRUE	TRUE
MAP4K4	NP_663719.2	2	1	2	1	-5.5165	-5.715	TRUE	TRUE	TRUE	FALSE	FALSE	FALSE	FALSE	FALSE	FALSE	FALSE
MARK3	NP_001122390.2	0	1	0	1	-4.6605	-4.646	FALSE	FALSE	FALSE	FALSE	FALSE	FALSE	FALSE	FALSE	FALSE	FALSE
MAST3	NP_055831.1	0	1	0	0	-4.664		FALSE	FALSE	FALSE	FALSE	FALSE	FALSE	FALSE	FALSE	FALSE	FALSE
MCTS1	NP_001131026.1	0	1	0	13	-4.9775	-4.9775	FALSE	FALSE	FALSE	FALSE	FALSE	FALSE	FALSE	FALSE	FALSE	FALSE
MEF2C	NP_002388.2	6	0	1	1	-7.5675	-7.214	TRUE	TRUE	TRUE	FALSE	FALSE	FALSE	TRUE	TRUE	TRUE	TRUE
MEIS1	NP_002389.1	0	1	0	1	-5.0145	-4.701	FALSE	FALSE	FALSE	FALSE	FALSE	FALSE	FALSE	FALSE	FALSE	FALSE
MEIS2	NP_733774.1	1	1	0	1	-5.6615	-5.0135	TRUE	TRUE	TRUE	FALSE	FALSE	FALSE	TRUE	TRUE	FALSE	TRUE
MPPED2	NP_001575.1	1	0	0	0	-5.102		FALSE	TRUE	TRUE	FALSE	FALSE	FALSE	FALSE	FALSE	FALSE	FALSE
MSI1	NP_002433.1	1	0	0	1	-5.153	-4.788	FALSE	TRUE	TRUE	FALSE	FALSE	FALSE	TRUE	FALSE	FALSE	TRUE
MYCN	NP_005369.2	0	2	0	0	-4.9145		FALSE	FALSE	FALSE	FALSE	FALSE	FALSE	TRUE	TRUE	FALSE	TRUE
MYH7	NP_000248.2	0	1	0	3	-4.934	-4.704	FALSE	FALSE	FALSE	FALSE	FALSE	FALSE	FALSE	FALSE	FALSE	FALSE
MYT1L	NP_055840.2	0	3	0	2	-5.135	-4.865	TRUE	TRUE	TRUE	FALSE	FALSE	FALSE	TRUE	TRUE	TRUE	TRUE
NAA10	NP_003482.1	8	0	1	0	-5.691	-5.179	TRUE	TRUE	TRUE	FALSE	FALSE	FALSE	TRUE	TRUE	TRUE	TRUE
NAA15	NP_476516.1	1	2	0	0	-5.2865		TRUE	TRUE	TRUE	FALSE	FALSE	FALSE	TRUE	TRUE	FALSE	TRUE
NAB2	NP_005958.1	0	1	0	0	-4.68		FALSE	FALSE	FALSE	FALSE	FALSE	FALSE	FALSE	FALSE	FALSE	FALSE
NACC1	NP_443108.1	0	1	0	0	-5.0185		TRUE	FALSE	TRUE	FALSE	FALSE	FALSE	TRUE	TRUE	TRUE	TRUE
NAMPT	NP_005737.1	0	1	0	0	-4.778		FALSE	FALSE	FALSE	FALSE	FALSE	FALSE	FALSE	FALSE	FALSE	FALSE
NF2	NP_000259.1	0	1	0	0	-4.635		FALSE	FALSE	FALSE	FALSE	FALSE	FALSE	FALSE	FALSE	FALSE	FALSE
NFIA	NP_005586.1	0	1	0	0	-4.7355		FALSE	FALSE	FALSE	FALSE	FALSE	FALSE	TRUE	TRUE	FALSE	TRUE
NFIX	NP_002492.2	3	1	0	0	-5.811		TRUE	TRUE	TRUE	FALSE	FALSE	FALSE	TRUE	TRUE	TRUE	TRUE
NONO	NP_001138880.1	1	0	0	0	-5.4895		TRUE	TRUE	TRUE	FALSE	FALSE	FALSE	TRUE	FALSE	FALSE	TRUE
NR2F1	NP_005645.1	3	0	0	0	-6.39		TRUE	TRUE	TRUE	FALSE	FALSE	FALSE	TRUE	TRUE	TRUE	TRUE
NR2F2	NP_066285.1	2	0	0	0	-6.3125		TRUE	TRUE	TRUE	FALSE	FALSE	FALSE	TRUE	FALSE	FALSE	TRUE
NR3C1	NP_001018087.1	1	0	0	0	-5.085		FALSE	TRUE	TRUE	FALSE	FALSE	FALSE	FALSE	FALSE	FALSE	FALSE
NR4A2	NP_006177.1	2	1	0	2	-6.0455	-4.7155	TRUE	TRUE	TRUE	FALSE	FALSE	FALSE	TRUE	TRUE	TRUE	TRUE
NSD2	NP_579877.1	1	0	1	0	-6.321	-5.333	TRUE	TRUE	TRUE	FALSE	FALSE	FALSE	TRUE	TRUE	FALSE	TRUE
OGT	NP_858058.1	2	0	6	4	-6.7535	-5.6735	TRUE	TRUE	TRUE	FALSE	FALSE	FALSE	TRUE	TRUE	TRUE	TRUE
OPA1	NP_056375.2	0	1	0	0	-4.9615		FALSE	FALSE	FALSE	FALSE	FALSE	FALSE	FALSE	FALSE	FALSE	TRUE
OTX2	NP_758840.1	1	0	0	2	-5.0675	-4.7925	FALSE	TRUE	TRUE	FALSE	FALSE	FALSE	TRUE	FALSE	FALSE	TRUE
P2RY10	NP_938147.1	0	1	1	0	-4.714	-5.185	FALSE	FALSE	FALSE	FALSE	FALSE	FALSE	FALSE	FALSE	FALSE	FALSE
PABPN1	NP_004634.1	1	0	2	0	-5.552	-5.552	FALSE	TRUE	TRUE	FALSE	FALSE	FALSE	FALSE	FALSE	FALSE	FALSE
PACS1	NP_060496.2	14	0	0	0	-5.0575		TRUE	TRUE	TRUE	FALSE	FALSE	FALSE	TRUE	TRUE	TRUE	TRUE
PAFAH1B1	NP_000421.1	1	0	0	0	-5.5425		TRUE	TRUE	TRUE	FALSE	FALSE	FALSE	TRUE	FALSE	FALSE	TRUE
PBX1	NP_002576.1	6	0	0	0	-5.4395		TRUE	TRUE	TRUE	FALSE	FALSE	FALSE	TRUE	TRUE	TRUE	TRUE
PBX3	NP_006186.1	0	1	0	0	-4.674		FALSE	FALSE	FALSE	FALSE	FALSE	FALSE	FALSE	FALSE	FALSE	FALSE
PCBP2	NP_005007.2	1	0	0	0	-6.965		TRUE	TRUE	TRUE	FALSE	FALSE	FALSE	TRUE	FALSE	FALSE	TRUE
PCDH19	NP_001171809.1	1	0	0	0	-5.6955		TRUE	TRUE	TRUE	FALSE	FALSE	FALSE	TRUE	TRUE	FALSE	TRUE
PCMT1	NP_005380.2	0	1	1	0	-4.933	-5.2335	FALSE	FALSE	FALSE	FALSE	FALSE	FALSE	FALSE	FALSE	FALSE	FALSE
PDE4D	NP_001098101.1	0	1	0	5	-4.935	-4.6845	TRUE	FALSE	TRUE	FALSE	FALSE	FALSE	TRUE	FALSE	FALSE	TRUE
PHACTR1	NP_112210.1	1	0	0	1	-5.212	-4.884	FALSE	TRUE	TRUE	FALSE	FALSE	FALSE	TRUE	FALSE	FALSE	TRUE
PHACTR3	NP_001186434.1	0	1	0	0	-4.851		FALSE	FALSE	FALSE	FALSE	FALSE	FALSE	FALSE	FALSE	FALSE	FALSE
PIK3CA	NP_006209.2	2	0	3	2	-6.3155	-6.084	TRUE	TRUE	TRUE	FALSE	FALSE	FALSE	TRUE	TRUE	TRUE	TRUE
PIK3CB	NP_006210.1	0	1	0	1	-4.8095	-4.8095	FALSE	FALSE	FALSE	FALSE	FALSE	FALSE	FALSE	FALSE	FALSE	FALSE
PITX2	NP_000316.2	0	1	0	0	-4.942		FALSE	FALSE	FALSE	FALSE	FALSE	FALSE	TRUE	FALSE	FALSE	TRUE
PLCL1	NP_006217.3	0	1	0	0	-4.65		FALSE	FALSE	FALSE	FALSE	FALSE	FALSE	FALSE	FALSE	FALSE	FALSE
PLD5	NP_001358991.1	0	1	0	0	-4.634		FALSE	FALSE	FALSE	FALSE	FALSE	FALSE	FALSE	FALSE	FALSE	FALSE
POU3F3	NP_006227.1	3	0	0	0	-5.467		TRUE	TRUE	TRUE	FALSE	FALSE	FALSE	TRUE	TRUE	FALSE	TRUE
PPP1CB	NP_996759.1	6	0	0	0	-6.7885		TRUE	TRUE	TRUE	FALSE	FALSE	FALSE	TRUE	TRUE	TRUE	TRUE
PPP2R1A	NP_055040.2	3	1	1	3	-5.466	-5.1535	TRUE	TRUE	TRUE	FALSE	FALSE	FALSE	TRUE	TRUE	TRUE	TRUE
PPP2R5C	NP_001155197.1	1	0	0	0	-6.642		FALSE	TRUE	TRUE	FALSE	FALSE	FALSE	FALSE	FALSE	FALSE	TRUE
PPP2R5D	NP_006236.1	2	1	0	1	-5.26	-5.0465	TRUE	TRUE	TRUE	FALSE	FALSE	FALSE	TRUE	TRUE	TRUE	TRUE
PPP3CA	NP_000935.1	2	0	1	0	-6.0705	-5.848	TRUE	TRUE	TRUE	FALSE	FALSE	FALSE	TRUE	FALSE	FALSE	TRUE
PRKAA1	NP_996790.3	1	0	0	0	-5.471		FALSE	TRUE	TRUE	FALSE	FALSE	FALSE	FALSE	FALSE	FALSE	FALSE
PRKAR1A	NP_002725.1	0	1	0	0	-4.816		TRUE	FALSE	TRUE	FALSE	FALSE	FALSE	TRUE	FALSE	FALSE	TRUE
PRKCA	NP_002728.2	0	2	0	1	-4.6265	-4.6865	FALSE	FALSE	FALSE	FALSE	FALSE	FALSE	FALSE	FALSE	FALSE	FALSE
PRKCB	NP_997700.1	1	0	0	0	-5.249		FALSE	TRUE	TRUE	FALSE	FALSE	FALSE	FALSE	FALSE	FALSE	FALSE
PRKCE	NP_005391.1	0	1	3	2	-4.922	-5.4775	FALSE	FALSE	FALSE	FALSE	FALSE	FALSE	FALSE	FALSE	FALSE	FALSE
PRPF19	NP_055317.1	1	0	1	2	-5.514	-5.335	FALSE	TRUE	TRUE	FALSE	FALSE	FALSE	FALSE	FALSE	FALSE	FALSE
PSMA2	NP_002778.1	1	0	0	0	-5.8		FALSE	TRUE	TRUE	FALSE	FALSE	FALSE	FALSE	FALSE	FALSE	FALSE
PSMC3	NP_002795.2	0	1	1	1	-4.9045	-5.085	TRUE	FALSE	TRUE	FALSE	FALSE	FALSE	FALSE	FALSE	FALSE	FALSE
PSMC5	NP_002796.4	2	2	0	3	-5.212	-4.9375	TRUE	TRUE	TRUE	FALSE	FALSE	FALSE	TRUE	TRUE	TRUE	TRUE
PTEN	NP_001291646.4	0	1	0	1	-5.353	-4.833	TRUE	TRUE	TRUE	FALSE	FALSE	FALSE	TRUE	TRUE	TRUE	TRUE
PTPN11	NP_002825.3	2	3	1	1	-5.6165	-5.5625	TRUE	TRUE	TRUE	FALSE	FALSE	FALSE	TRUE	TRUE	TRUE	TRUE
PUF60	NP_510965.1	2	1	3	0	-6.169	-5.741	TRUE	TRUE	TRUE	FALSE	FALSE	FALSE	TRUE	TRUE	FALSE	TRUE
PURA	NP_005850.1	4	0	1	3	-6.936	-5.756	TRUE	TRUE	TRUE	FALSE	FALSE	FALSE	TRUE	TRUE	TRUE	TRUE
RAB11A	NP_004654.1	2	0	0	0	-6.242		TRUE	TRUE	TRUE	FALSE	FALSE	FALSE	TRUE	FALSE	FALSE	TRUE
RAB11B	NP_004209.2	0	1	0	0	-4.9695		TRUE	FALSE	TRUE	FALSE	FALSE	FALSE	TRUE	FALSE	FALSE	TRUE
RAB14	NP_057406.2	1	0	0	1	-5.5245	-4.791	TRUE	TRUE	TRUE	FALSE	FALSE	FALSE	TRUE	TRUE	TRUE	TRUE
RAC1	NP_061485.1	1	2	0	0	-5.423		TRUE	TRUE	TRUE	FALSE	FALSE	FALSE	TRUE	TRUE	TRUE	TRUE
RAC3	NP_005043.1	0	1	0	0	-4.764		FALSE	FALSE	FALSE	FALSE	FALSE	TRUE	TRUE	FALSE	FALSE	TRUE
RAF1	NP_002871.1	0	1	1	0	-5.52	-5.0685	FALSE	FALSE	FALSE	FALSE	FALSE	FALSE	TRUE	FALSE	FALSE	TRUE
RB1	NP_000312.2	0	1	0	0	-4.985		FALSE	FALSE	FALSE	FALSE	FALSE	FALSE	FALSE	FALSE	FALSE	FALSE
RBBP4	NP_005601.1	1	0	1	0	-6.8185	-5.231	TRUE	TRUE	TRUE	FALSE	FALSE	FALSE	FALSE	FALSE	FALSE	FALSE
RBBP7	NP_001185648.1	1	0	3	1	-5.9665	-6.889	FALSE	TRUE	TRUE	FALSE	FALSE	FALSE	FALSE	FALSE	FALSE	FALSE
RBM46	NP_659416.1	0	1	0	0	-4.619		FALSE	FALSE	FALSE	FALSE	FALSE	FALSE	FALSE	FALSE	FALSE	FALSE
RBX1	NP_055063.1	0	1	0	0	-4.876		FALSE	FALSE	FALSE	FALSE	FALSE	FALSE	FALSE	FALSE	FALSE	FALSE
REST	NP_005603.3	0	1	0	0	-5.035		FALSE	FALSE	FALSE	FALSE	FALSE	FALSE	FALSE	FALSE	FALSE	FALSE
RHOG	NP_001656.2	0	1	0	0	-4.9465		FALSE	FALSE	FALSE	FALSE	FALSE	FALSE	FALSE	FALSE	FALSE	FALSE
RIT1	NP_008843.1	0	1	0	0	-4.642		TRUE	FALSE	TRUE	FALSE	FALSE	FALSE	TRUE	TRUE	TRUE	TRUE
RORB	NP_001351952.1	1	1	0	1	-5.381	-4.908	TRUE	TRUE	TRUE	FALSE	FALSE	FALSE	TRUE	FALSE	FALSE	TRUE
RPL10	NP_001243506.2	2	0	1	0	-5.3705	-5.2825	TRUE	TRUE	TRUE	FALSE	FALSE	FALSE	TRUE	FALSE	FALSE	TRUE
RPTOR	NP_065812.1	0	1	0	0	-4.6675		FALSE	FALSE	FALSE	FALSE	FALSE	FALSE	FALSE	FALSE	FALSE	FALSE
RTF1	NP_055953.3	1	0	0	3	-5.13	-4.872	FALSE	TRUE	TRUE	FALSE	FALSE	FALSE	FALSE	FALSE	FALSE	FALSE
SATB1	NP_001182399.1	0	2	1	2	-4.8695	-5.056	TRUE	FALSE	TRUE	FALSE	FALSE	FALSE	TRUE	TRUE	TRUE	TRUE
SATB2	NP_056080.1	7	4	2	2	-5.805	-5.3315	TRUE	TRUE	TRUE	FALSE	FALSE	FALSE	TRUE	TRUE	TRUE	TRUE
SCARF2	NP_699165.3	0	1	0	0	-4.858		FALSE	FALSE	FALSE	FALSE	FALSE	FALSE	TRUE	FALSE	FALSE	TRUE
SCN1A	NP_001159435.1	1	2	2	0	-6.1825	-5.533	TRUE	TRUE	TRUE	FALSE	FALSE	FALSE	TRUE	TRUE	TRUE	TRUE
SCN2A	NP_066287.2	9	2	4	0	-7.655	-7.161	TRUE	TRUE	TRUE	FALSE	FALSE	FALSE	TRUE	TRUE	TRUE	TRUE
SCN3A	NP_008853.3	0	1	0	2	-5.194	-4.742	TRUE	TRUE	TRUE	FALSE	FALSE	FALSE	TRUE	FALSE	FALSE	TRUE
SCN8A	NP_055006.1	9	3	7	4	-6.262	-5.5515	TRUE	TRUE	TRUE	FALSE	FALSE	FALSE	TRUE	TRUE	TRUE	TRUE
SETD1B	NP_001340274.1	1	0	0	0	-5.7085		FALSE	TRUE	TRUE	FALSE	FALSE	FALSE	TRUE	FALSE	FALSE	TRUE
SETD5	NP_001073986.1	0	2	0	0	-5.2675		TRUE	TRUE	TRUE	FALSE	FALSE	FALSE	TRUE	TRUE	TRUE	TRUE
SETDB1	NP_001138887.1	0	1	0	0	-4.7625		FALSE	FALSE	FALSE	FALSE	FALSE	FALSE	FALSE	FALSE	FALSE	FALSE
SF1	NP_001171501.1	1	1	1	0	-5.617	-5.3475	FALSE	TRUE	TRUE	FALSE	FALSE	FALSE	FALSE	FALSE	FALSE	FALSE
SF3B1	NP_036565.2	2	1	1	1	-5.553	-5.0775	TRUE	TRUE	TRUE	FALSE	FALSE	FALSE	FALSE	FALSE	FALSE	FALSE
SHANK2	NP_573573.2	0	1	0	0	-4.6825		FALSE	FALSE	FALSE	FALSE	FALSE	FALSE	TRUE	FALSE	FALSE	TRUE
SIAH1	NP_001006611.1	1	1	0	0	-6.9875		TRUE	TRUE	TRUE	FALSE	FALSE	FALSE	TRUE	FALSE	FALSE	TRUE
SIX3	NP_005404.1	0	3	0	0	-5.0005		FALSE	FALSE	FALSE	FALSE	FALSE	FALSE	TRUE	FALSE	FALSE	TRUE
SLC12A5	NP_001128243.1	0	1	0	0	-4.6305		FALSE	FALSE	FALSE	FALSE	FALSE	FALSE	TRUE	FALSE	FALSE	TRUE
SLC1A2	NP_004162.2	1	0	0	0	-5.245		FALSE	TRUE	TRUE	FALSE	FALSE	FALSE	TRUE	FALSE	FALSE	TRUE
SLC2A1	NP_006507.2	1	2	0	1	-5.6975	-4.8245	TRUE	TRUE	TRUE	FALSE	FALSE	FALSE	TRUE	TRUE	TRUE	TRUE
SLC39A8	NP_071437.3	0	1	0	11	-4.777	-5.033	FALSE	FALSE	FALSE	FALSE	FALSE	FALSE	TRUE	FALSE	FALSE	TRUE
SLC6A1	NP_003033.3	10	0	6	0	-6.519	-6.0225	TRUE	TRUE	TRUE	FALSE	FALSE	FALSE	TRUE	TRUE	TRUE	TRUE
SLC8A1	NP_066920.1	0	1	0	2	-4.676	-4.782	FALSE	FALSE	FALSE	FALSE	FALSE	FALSE	FALSE	FALSE	FALSE	FALSE
SMAD2	NP_005892.1	2	0	0	0	-5.306		FALSE	TRUE	TRUE	FALSE	FALSE	FALSE	TRUE	FALSE	FALSE	TRUE
SMAD3	NP_005893.1	0	1	0	1	-4.8265	-4.6985	FALSE	FALSE	FALSE	FALSE	FALSE	FALSE	TRUE	FALSE	FALSE	TRUE
SMAD4	NP_005350.1	0	4	0	0	-4.9885		TRUE	FALSE	TRUE	FALSE	FALSE	FALSE	TRUE	TRUE	TRUE	TRUE
SMARCA2	NP_003061.3	4	2	0	0	-6.6065		TRUE	TRUE	FALSE	FALSE	FALSE	TRUE	TRUE	TRUE	TRUE	TRUE
SMARCA4	NP_001122317.1	6	2	0	2	-5.967	-4.8915	TRUE	TRUE	TRUE	FALSE	FALSE	FALSE	TRUE	TRUE	TRUE	TRUE
SMARCC2	NP_003066.2	1	0	1	2	-5.5655	-5.0815	FALSE	TRUE	TRUE	FALSE	FALSE	FALSE	TRUE	FALSE	FALSE	TRUE
SMARCE1	NP_003070.3	1	0	0	0	-5.8045		TRUE	TRUE	TRUE	FALSE	FALSE	FALSE	TRUE	FALSE	FALSE	TRUE
SMC1A	NP_006297.2	1	3	6	4	-5.637	-6.0405	TRUE	TRUE	TRUE	FALSE	FALSE	FALSE	TRUE	TRUE	TRUE	TRUE
SMC3	NP_005436.1	2	2	0	1	-5.363	-4.6815	TRUE	TRUE	TRUE	FALSE	FALSE	FALSE	TRUE	FALSE	FALSE	TRUE
SNAP25	NP_570824.1	0	1	0	0	-4.7325		TRUE	FALSE	TRUE	FALSE	FALSE	FALSE	TRUE	TRUE	FALSE	TRUE
SNW1	NP_036377.1	1	0	1	0	-5.3255	-5.383	FALSE	TRUE	TRUE	FALSE	FALSE	FALSE	FALSE	FALSE	FALSE	FALSE
SOX11	NP_003099.1	5	1	1	0	-5.8785	-5.467	TRUE	TRUE	TRUE	FALSE	FALSE	FALSE	TRUE	TRUE	TRUE	TRUE
SOX2	NP_003097.1	1	0	0	1	-5.3135	-4.6965	FALSE	TRUE	TRUE	FALSE	FALSE	FALSE	TRUE	FALSE	FALSE	TRUE
SOX4	NP_003098.1	0	2	0	0	-4.7995		FALSE	FALSE	FALSE	FALSE	FALSE	TRUE	TRUE	FALSE	FALSE	TRUE
SOX5	NP_008871.3	0	3	0	1	-5.1645	-4.7055	TRUE	TRUE	TRUE	FALSE	FALSE	FALSE	TRUE	TRUE	TRUE	TRUE
SOX6	NP_201583.2	0	1	0	0	-4.7255		FALSE	FALSE	FALSE	FALSE	FALSE	FALSE	TRUE	FALSE	FALSE	TRUE
SOX9	NP_000337.1	0	1	0	0	-5.023		FALSE	FALSE	FALSE	FALSE	FALSE	FALSE	TRUE	FALSE	FALSE	TRUE
SP4	NP_003103.2	0	1	0	2	-4.834	-4.8025	FALSE	FALSE	FALSE	FALSE	FALSE	FALSE	FALSE	FALSE	FALSE	FALSE
SPAST	NP_055761.2	0	1	1	1	-5.172	-5.349	TRUE	TRUE	TRUE	FALSE	FALSE	FALSE	TRUE	TRUE	TRUE	TRUE
SPIN1	NP_006708.2	1	0	0	0	-5.8635		FALSE	TRUE	TRUE	FALSE	FALSE	FALSE	FALSE	FALSE	FALSE	FALSE
SPIRE1	NP_001122098.1	1	0	0	1	-5.3035	-4.81	FALSE	TRUE	TRUE	FALSE	FALSE	FALSE	FALSE	FALSE	FALSE	FALSE
SRSF1	NP_008855.1	3	0	0	0	-5.9055		TRUE	TRUE	TRUE	FALSE	FALSE	FALSE	TRUE	FALSE	FALSE	TRUE
SRSF3	NP_003008.1	1	0	1	0	-5.172	-5.3835	FALSE	TRUE	TRUE	FALSE	FALSE	FALSE	FALSE	FALSE	FALSE	FALSE
SRSF7	NP_001026854.1	0	1	0	0	-4.9335		FALSE	FALSE	FALSE	FALSE	FALSE	FALSE	FALSE	FALSE	FALSE	FALSE
STAG1	NP_005853.2	1	2	0	1	-5.1375	-5.054	TRUE	TRUE	TRUE	FALSE	FALSE	FALSE	TRUE	FALSE	FALSE	TRUE
STK3	NP_001243241.1	0	1	0	0	-4.745		FALSE	FALSE	FALSE	FALSE	FALSE	FALSE	FALSE	FALSE	FALSE	FALSE
STXBP1	NP_003156.1	9	4	0	1	-6.9585	-4.6795	TRUE	TRUE	TRUE	FALSE	FALSE	FALSE	TRUE	TRUE	TRUE	TRUE
SYNGAP1	NP_006763.2	1	2	0	1	-5.378	-4.806	TRUE	TRUE	TRUE	FALSE	FALSE	FALSE	TRUE	TRUE	FALSE	TRUE
SYT1	NP_001129277.1	3	1	0	1	-5.969	-5.0155	TRUE	TRUE	TRUE	FALSE	FALSE	FALSE	TRUE	TRUE	TRUE	TRUE
TAF1	NP_001273003.2	0	1	1	4	-5.669	-5.449	TRUE	TRUE	TRUE	FALSE	FALSE	FALSE	TRUE	TRUE	TRUE	TRUE
TAOK1	NP_065842.1	3	1	0	3	-5.3305	-4.9455	TRUE	TRUE	TRUE	FALSE	FALSE	FALSE	TRUE	TRUE	FALSE	TRUE
TBL1XR1	NP_078941.2	6	3	0	0	-6.915		TRUE	TRUE	TRUE	FALSE	FALSE	FALSE	TRUE	TRUE	TRUE	TRUE
TBR1	NP_006584.1	1	0	0	1	-5.176	-4.7725	FALSE	TRUE	TRUE	FALSE	FALSE	FALSE	TRUE	FALSE	FALSE	TRUE
TBX3	NP_005987.3	1	0	0	2	-5.291	-4.77	FALSE	TRUE	TRUE	FALSE	FALSE	FALSE	TRUE	FALSE	FALSE	TRUE
TCF4	NP_001077431.1	3	0	0	1	-5.818	-4.9235	TRUE	TRUE	TRUE	FALSE	FALSE	FALSE	TRUE	TRUE	TRUE	TRUE
TCF7L2	NP_001354872.1	1	0	0	0	-5.489		TRUE	TRUE	TRUE	FALSE	FALSE	FALSE	TRUE	TRUE	FALSE	TRUE
TFAP2A	NP_001358995.1	1	2	0	0	-5.804		TRUE	TRUE	TRUE	FALSE	FALSE	FALSE	TRUE	FALSE	FALSE	TRUE
TFE3	NP_006512.2	0	2	0	3	-4.7495	-4.726	TRUE	FALSE	TRUE	FALSE	FALSE	FALSE	TRUE	TRUE	TRUE	TRUE
TGFBR1	NP_004603.1	0	2	0	2	-4.9715	-4.7505	FALSE	FALSE	FALSE	FALSE	FALSE	FALSE	TRUE	FALSE	FALSE	TRUE
TLK2	NP_006843.2	5	0	4	0	-5.788	-5.445	TRUE	TRUE	TRUE	FALSE	FALSE	FALSE	TRUE	TRUE	TRUE	TRUE
TM9SF3	NP_064508.3	0	1	0	1	-4.9715	-4.7825	FALSE	FALSE	FALSE	FALSE	FALSE	FALSE	FALSE	FALSE	FALSE	FALSE
TMED2	NP_001308374.1	0	1	0	0	-4.9525		FALSE	FALSE	FALSE	FALSE	FALSE	FALSE	FALSE	FALSE	FALSE	FALSE
TMEM163	NP_112185.1	0	1	0	1	-4.676	-4.62	FALSE	FALSE	FALSE	FALSE	FALSE	FALSE	FALSE	FALSE	FALSE	FALSE
TNKS	NP_003738.2	0	1	0	1	-4.722	-4.722	FALSE	FALSE	FALSE	FALSE	FALSE	TRUE	FALSE	FALSE	FALSE	FALSE
TNPO2	NP_001129668.1	2	0	0	2	-5.313	-4.966	TRUE	TRUE	TRUE	FALSE	FALSE	FALSE	TRUE	FALSE	FALSE	TRUE
TP53BP1	NP_005648.1	0	1	0	0	-4.67		FALSE	FALSE	FALSE	FALSE	FALSE	FALSE	FALSE	FALSE	FALSE	FALSE
TP63	NP_003713.3	1	0	0	1	-5.23	-4.804	FALSE	TRUE	TRUE	FALSE	FALSE	FALSE	TRUE	FALSE	FALSE	TRUE
TPM2	NP_003280.2	0	2	0	1	-4.719	-4.6655	FALSE	FALSE	FALSE	FALSE	FALSE	FALSE	TRUE	FALSE	FALSE	TRUE
TRIM27	NP_006501.1	0	1	0	1	-4.6705	-4.861	FALSE	FALSE	FALSE	FALSE	FALSE	FALSE	FALSE	FALSE	FALSE	FALSE
TRIP12	NP_004229.1	2	1	0	2	-5.657	-5.004	FALSE	TRUE	TRUE	FALSE	FALSE	FALSE	TRUE	TRUE	FALSE	TRUE
TRPC1	NP_001238774.1	0	1	0	0	-4.7795		FALSE	FALSE	FALSE	FALSE	FALSE	FALSE	FALSE	FALSE	FALSE	FALSE
TUBA8	NP_061816.1	0	1	0	0	-4.811		FALSE	FALSE	FALSE	FALSE	FALSE	FALSE	TRUE	FALSE	FALSE	TRUE
TUBB4B	NP_006079.1	1	0	0	0	-5.246		FALSE	TRUE	FALSE	FALSE	FALSE	TRUE	FALSE	FALSE	FALSE	FALSE
U2AF2	NP_009210.1	4	0	1	3	-6.8105	-6.066	TRUE	TRUE	TRUE	FALSE	FALSE	FALSE	TRUE	TRUE	TRUE	TRUE
UBA1	NP_003325.2	0	1	2	0	-4.816	-5.2075	FALSE	FALSE	FALSE	FALSE	FALSE	FALSE	FALSE	FALSE	FALSE	FALSE
UBAP2L	NP_055662.3	0	1	0	0	-4.7615		FALSE	FALSE	FALSE	FALSE	FALSE	FALSE	FALSE	FALSE	FALSE	FALSE
UBE2H	NP_003335.1	1	0	0	0	-6.2305		FALSE	TRUE	TRUE	FALSE	FALSE	FALSE	FALSE	FALSE	FALSE	FALSE
UPF1	NP_001284478.1	2	0	1	1	-5.299	-5.4805	TRUE	TRUE	TRUE	FALSE	FALSE	FALSE	TRUE	TRUE	TRUE	TRUE
USP22	NP_056091.1	0	1	1	0	-4.6235	-5.13	FALSE	FALSE	FALSE	FALSE	FALSE	FALSE	FALSE	FALSE	FALSE	FALSE
VAMP2	NP_055047.2	1	1	0	0	-5.8625		TRUE	TRUE	TRUE	FALSE	FALSE	FALSE	TRUE	TRUE	TRUE	TRUE
VAV2	NP_001127870.1	1	0	0	1	-5.117	-4.8	FALSE	TRUE	TRUE	FALSE	FALSE	FALSE	FALSE	FALSE	FALSE	FALSE
VCP	NP_009057.1	1	0	0	2	-6.4995	-4.9485	TRUE	TRUE	TRUE	FALSE	FALSE	FALSE	TRUE	FALSE	FALSE	TRUE
WARS1	NP_004175.2	1	1	0	2	-5.8575	-4.7485	TRUE	TRUE	TRUE	FALSE	FALSE	FALSE	FALSE	FALSE	FALSE	FALSE
WDR26	NP_079436.4	2	0	0	1	-5.8855	-4.8565	TRUE	TRUE	TRUE	FALSE	FALSE	FALSE	TRUE	TRUE	FALSE	TRUE
WDR43	NP_055946.1	0	1	0	0	-4.71		FALSE	FALSE	FALSE	FALSE	FALSE	FALSE	FALSE	FALSE	FALSE	FALSE
WDR44	NP_061918.3	0	1	1	3	-4.746	-5.097	FALSE	FALSE	FALSE	FALSE	FALSE	FALSE	FALSE	FALSE	FALSE	FALSE
WDR45	NP_009006.2	3	0	1	0	-5.9125	-5.591	TRUE	TRUE	TRUE	FALSE	FALSE	FALSE	TRUE	TRUE	TRUE	TRUE
WDR5	NP_438172.1	1	0	0	1	-6.81	-4.9055	TRUE	TRUE	TRUE	FALSE	FALSE	FALSE	FALSE	FALSE	FALSE	FALSE
WNT3	NP_110380.1	0	1	0	0	-4.746		FALSE	FALSE	FALSE	FALSE	FALSE	FALSE	TRUE	FALSE	FALSE	TRUE
XPO1	NP_003391.1	1	0	0	1	-6.2095	-4.7145	TRUE	TRUE	TRUE	FALSE	FALSE	FALSE	FALSE	FALSE	FALSE	FALSE
XPR1	NP_004727.2	0	1	0	4	-4.8795	-4.9845	FALSE	FALSE	FALSE	FALSE	FALSE	FALSE	FALSE	FALSE	FALSE	TRUE
YAP1	NP_001123617.1	0	1	0	0	-4.6735		FALSE	FALSE	FALSE	FALSE	FALSE	FALSE	TRUE	FALSE	FALSE	TRUE
YWHAE	NP_006752.1	0	2	0	2	-4.9355	-4.7265	FALSE	FALSE	FALSE	FALSE	FALSE	FALSE	FALSE	FALSE	FALSE	TRUE
YWHAG	NP_036611.2	3	1	0	1	-5.5215	-4.9575	TRUE	TRUE	TRUE	FALSE	FALSE	FALSE	TRUE	FALSE	FALSE	TRUE
YY1	NP_003394.1	3	0	1	0	-7.4625	-7.083	TRUE	TRUE	TRUE	FALSE	FALSE	FALSE	TRUE	TRUE	FALSE	TRUE
ZBTB20	NP_001157814.1	3	2	0	0	-5.4945		TRUE	TRUE	TRUE	FALSE	FALSE	FALSE	TRUE	TRUE	TRUE	TRUE
ZC3H12B	NP_001010888.3	0	1	0	0	-4.685		FALSE	FALSE	FALSE	FALSE	FALSE	FALSE	FALSE	FALSE	FALSE	FALSE
ZC4H2	NP_061154.1	2	0	1	0	-6.6085	-5.743	TRUE	TRUE	TRUE	FALSE	FALSE	FALSE	TRUE	TRUE	TRUE	TRUE
ZDHHC17	NP_056151.2	0	1	0	1	-4.7485	-4.976	FALSE	FALSE	FALSE	FALSE	FALSE	FALSE	FALSE	FALSE	FALSE	FALSE
ZDHHC5	NP_056272.2	0	1	0	1	-4.809	-4.683	FALSE	FALSE	FALSE	FALSE	FALSE	FALSE	FALSE	FALSE	FALSE	FALSE
ZDHHC9	NP_057116.2	1	0	1	0	-5.778	-5.778	FALSE	TRUE	TRUE	FALSE	FALSE	FALSE	TRUE	FALSE	FALSE	TRUE
ZEB2	NP_055610.1	1	0	2	3	-5.6155	-5.746	FALSE	TRUE	TRUE	FALSE	FALSE	FALSE	TRUE	TRUE	FALSE	TRUE
ZFX	NP_001317256.1	1	0	0	1	-5.3655	-4.8145	FALSE	TRUE	TRUE	FALSE	FALSE	FALSE	FALSE	FALSE	FALSE	FALSE
ZIC1	NP_003403.2	1	0	0	1	-5.1445	-4.665	FALSE	TRUE	TRUE	FALSE	FALSE	FALSE	TRUE	FALSE	FALSE	TRUE
ZMYND8	NP_001350643.1	1	0	1	0	-5.8215	-5.3225	TRUE	TRUE	TRUE	FALSE	FALSE	FALSE	FALSE	FALSE	FALSE	FALSE
ZNF777	NP_056509.2	1	0	0	0	-5.37		FALSE	TRUE	TRUE	FALSE	FALSE	FALSE	FALSE	FALSE	FALSE	FALSE
AADACL2	NP_997248.2	0	0	0	6		-4.6215	FALSE	FALSE	FALSE	FALSE	FALSE	FALSE	FALSE	FALSE	FALSE	FALSE
AAK1	NP_055726.4	0	0	0	8	-4.2395	-4.754	FALSE	FALSE	FALSE	FALSE	FALSE	FALSE	FALSE	FALSE	FALSE	FALSE
ABCB7	NP_004290.2	0	0	0	5	-4.424	-4.8485	FALSE	FALSE	FALSE	FALSE	FALSE	FALSE	TRUE	FALSE	FALSE	TRUE
ABCC4	NP_001288758.1	0	0	0	1	-4.596	-4.714	FALSE	FALSE	FALSE	FALSE	FALSE	FALSE	FALSE	FALSE	FALSE	FALSE
ABCC9	NP_005682.2	0	0	0	5	-4.576	-4.8275	TRUE	FALSE	TRUE	FALSE	FALSE	FALSE	TRUE	FALSE	FALSE	TRUE
ABHD2	NP_008942.3	0	0	0	1		-4.9205	FALSE	FALSE	FALSE	FALSE	FALSE	FALSE	FALSE	FALSE	FALSE	FALSE
ABL1	NP_009297.2	0	0	0	1	-4.722	-4.9115	TRUE	FALSE	TRUE	FALSE	FALSE	FALSE	TRUE	TRUE	TRUE	TRUE
ACHE	NP_000656.1	0	0	0	1	-3.219	-4.802	FALSE	FALSE	FALSE	FALSE	FALSE	FALSE	FALSE	FALSE	FALSE	FALSE
ACO2	NP_001089.1	0	0	0	2	-2.928	-4.8225	FALSE	FALSE	FALSE	FALSE	FALSE	FALSE	TRUE	FALSE	FALSE	TRUE
ACOT11	NP_056362.1	0	0	0	2	-3.0515	-4.924	FALSE	FALSE	FALSE	FALSE	FALSE	FALSE	FALSE	FALSE	FALSE	FALSE
ACSL1	NP_001273637.1	0	0	0	1		-4.667	FALSE	FALSE	FALSE	FALSE	FALSE	FALSE	FALSE	FALSE	FALSE	FALSE
ACTA1	NP_001091.1	0	0	0	1	-4.344	-4.897	FALSE	FALSE	FALSE	FALSE	FALSE	FALSE	TRUE	FALSE	FALSE	TRUE
ACTB	NP_001092.1	0	0	0	1	-5.969	-4.935	FALSE	FALSE	FALSE	FALSE	FALSE	FALSE	TRUE	FALSE	FALSE	TRUE
ACTBL2	NP_001017992.1	0	0	0	1		-4.6685	FALSE	FALSE	FALSE	FALSE	FALSE	FALSE	FALSE	FALSE	FALSE	FALSE
ACTG1	NP_001605.1	0	0	0	2	-2.872	-4.763	FALSE	FALSE	FALSE	FALSE	FALSE	FALSE	TRUE	FALSE	FALSE	TRUE
ACTN1	NP_001123476.1	0	0	0	1	-4.4495	-4.9445	FALSE	FALSE	FALSE	FALSE	FALSE	FALSE	FALSE	FALSE	FALSE	FALSE
ACTR6	NP_071941.1	0	0	0	3	-3.7015	-4.892	FALSE	FALSE	FALSE	FALSE	FALSE	FALSE	FALSE	FALSE	FALSE	FALSE
ACVR1B	NP_004293.1	0	0	0	1	-3.815	-4.759	FALSE	FALSE	FALSE	FALSE	FALSE	FALSE	FALSE	FALSE	FALSE	FALSE
ACVR2A	NP_001265508.1	0	0	0	6		-4.916	FALSE	FALSE	FALSE	FALSE	FALSE	FALSE	FALSE	FALSE	FALSE	FALSE
ADAM22	NP_068369.1	0	0	0	2	-3.656	-4.889	FALSE	FALSE	FALSE	FALSE	FALSE	FALSE	TRUE	FALSE	FALSE	TRUE
ADAM23	NP_003803.1	0	0	0	1	-4.5775	-4.706	FALSE	FALSE	FALSE	FALSE	FALSE	FALSE	FALSE	FALSE	FALSE	FALSE
ADAMTS6	NP_922932.2	0	0	0	1	-4.0695	-4.7335	FALSE	FALSE	FALSE	FALSE	FALSE	FALSE	FALSE	FALSE	FALSE	FALSE
ADCY2	NP_065433.2	0	0	2	0	-4.6265	-5.343	FALSE	FALSE	FALSE	FALSE	FALSE	FALSE	FALSE	FALSE	FALSE	FALSE
ADCY5	NP_899200.1	0	0	0	2	-4.3605	-4.798	TRUE	FALSE	TRUE	FALSE	FALSE	FALSE	TRUE	TRUE	TRUE	TRUE
ADGRA3	NP_660333.2	0	0	0	1	-3.951	-4.6745	FALSE	FALSE	FALSE	FALSE	FALSE	FALSE	FALSE	FALSE	FALSE	FALSE
ADGRB3	NP_001695.2	0	0	0	2	-4.559	-4.69	FALSE	FALSE	FALSE	FALSE	FALSE	FALSE	FALSE	FALSE	FALSE	FALSE
ADGRL3	NP_001309331.1	0	0	0	1	-3.5015	-4.7485	FALSE	FALSE	FALSE	FALSE	FALSE	FALSE	FALSE	FALSE	FALSE	FALSE
ADRM1	NP_008933.2	0	0	1	0	-4.269	-5.1025	FALSE	FALSE	FALSE	FALSE	FALSE	FALSE	FALSE	FALSE	FALSE	FALSE
AFF3	NP_001020279.1	0	0	0	1	-3.876	-4.6465	FALSE	FALSE	FALSE	FALSE	FALSE	FALSE	TRUE	TRUE	TRUE	TRUE
AFG3L2	NP_006787.2	0	0	1	0	-4.7605	-5.1955	TRUE	FALSE	TRUE	FALSE	FALSE	FALSE	TRUE	FALSE	FALSE	TRUE
AGFG1	NP_001128659.1	0	0	0	1		-4.6725	FALSE	FALSE	FALSE	FALSE	FALSE	FALSE	FALSE	FALSE	FALSE	FALSE
AGO2	NP_036286.2	0	0	0	1	-5.703	-5.0205	FALSE	TRUE	TRUE	FALSE	FALSE	FALSE	FALSE	FALSE	FALSE	TRUE
AGO3	NP_079128.2	0	0	0	2	-4.8405	-4.9265	FALSE	FALSE	FALSE	FALSE	FALSE	FALSE	FALSE	FALSE	FALSE	FALSE
AGPAT4	NP_064518.1	0	0	0	2	-3.171	-4.63	FALSE	FALSE	FALSE	FALSE	FALSE	FALSE	FALSE	FALSE	FALSE	FALSE
AGPS	NP_003650.1	0	0	0	5	-3.9125	-4.986	FALSE	FALSE	FALSE	FALSE	FALSE	FALSE	TRUE	FALSE	FALSE	TRUE
AHCYL2	NP_001124195.1	0	0	0	1		-4.8585	FALSE	FALSE	FALSE	FALSE	FALSE	FALSE	FALSE	FALSE	FALSE	FALSE
AIFM1	NP_004199.1	0	0	2	2	-4.1445	-5.0945	FALSE	FALSE	FALSE	FALSE	FALSE	FALSE	TRUE	FALSE	FALSE	TRUE
AK9	NP_001138600.2	0	0	0	9	-3.882	-4.6625	FALSE	FALSE	FALSE	FALSE	FALSE	FALSE	FALSE	FALSE	FALSE	FALSE
AKAP1	NP_001229831.1	0	0	0	1	-3.347	-4.8685	FALSE	FALSE	FALSE	FALSE	FALSE	FALSE	FALSE	FALSE	FALSE	FALSE
AKAP4	NP_003877.2	0	0	1	0		-5.216	FALSE	FALSE	FALSE	FALSE	FALSE	FALSE	FALSE	FALSE	FALSE	FALSE
AKT2	NP_001617.1	0	0	0	1		-4.775	FALSE	FALSE	FALSE	FALSE	FALSE	FALSE	TRUE	FALSE	FALSE	TRUE
ALAD	NP_000022.3	0	0	0	2	-3.7085	-4.6205	FALSE	FALSE	FALSE	FALSE	FALSE	FALSE	TRUE	FALSE	FALSE	TRUE
ALAS2	NP_000023.2	0	0	1	0	-4.4605	-5.5355	FALSE	FALSE	FALSE	FALSE	FALSE	FALSE	FALSE	FALSE	FALSE	FALSE
ALDH18A1	NP_002851.2	0	0	0	1		-4.676	FALSE	FALSE	FALSE	FALSE	FALSE	FALSE	TRUE	FALSE	FALSE	TRUE
ALDH1A1	NP_000680.2	0	0	0	1	-3.138	-4.833	FALSE	FALSE	FALSE	FALSE	FALSE	FALSE	FALSE	FALSE	FALSE	FALSE
ALDH1A2	NP_003879.2	0	0	0	1	-3.4885	-4.77	FALSE	FALSE	FALSE	FALSE	FALSE	FALSE	TRUE	FALSE	FALSE	TRUE
ALDH5A1	NP_001071.1	0	0	0	1		-4.6335	FALSE	FALSE	FALSE	FALSE	FALSE	FALSE	TRUE	FALSE	FALSE	TRUE
ALG5	NP_037470.1	0	0	0	1		-4.6945	FALSE	FALSE	FALSE	FALSE	FALSE	FALSE	FALSE	FALSE	FALSE	FALSE
ALKBH5	NP_060228.3	0	0	0	1		-4.9045	FALSE	FALSE	FALSE	FALSE	FALSE	FALSE	FALSE	FALSE	FALSE	FALSE
ALPK3	NP_065829.4	0	0	1	3	-3.287	-5.076	FALSE	FALSE	FALSE	FALSE	FALSE	FALSE	FALSE	FALSE	FALSE	FALSE
ALX1	NP_008913.2	0	0	0	1		-4.626	FALSE	FALSE	FALSE	FALSE	FALSE	FALSE	TRUE	FALSE	FALSE	TRUE
AMFR	NP_001310441.1	0	0	0	1	-3.016	-4.6975	FALSE	FALSE	FALSE	FALSE	FALSE	FALSE	FALSE	FALSE	FALSE	FALSE
AMIGO1	NP_065754.2	0	0	0	1	-6.1155	-4.9945	FALSE	TRUE	TRUE	FALSE	FALSE	FALSE	FALSE	FALSE	FALSE	FALSE
AMOTL1	NP_570899.1	0	0	0	1	-3.5995	-4.753	FALSE	FALSE	FALSE	FALSE	FALSE	FALSE	FALSE	FALSE	FALSE	FALSE
AMPD1	NP_000027.3	0	0	0	1	-3.1685	-4.843	FALSE	FALSE	FALSE	FALSE	FALSE	FALSE	FALSE	FALSE	FALSE	FALSE
ANAPC10	NP_001243635.1	0	0	0	1		-4.7055	FALSE	FALSE	FALSE	FALSE	FALSE	FALSE	FALSE	FALSE	FALSE	FALSE
ANAPC4	NP_001273685.1	0	0	0	2		-4.651	FALSE	FALSE	FALSE	FALSE	FALSE	FALSE	FALSE	FALSE	FALSE	FALSE
ANK1	NP_000028.3	0	0	0	1	-4.0195	-4.632	FALSE	FALSE	FALSE	FALSE	FALSE	FALSE	FALSE	FALSE	FALSE	FALSE
ANKH	NP_473368.1	0	0	0	1	-3.5925	-4.7625	FALSE	FALSE	FALSE	FALSE	FALSE	FALSE	TRUE	FALSE	FALSE	TRUE
ANKRD12	NP_056023.3	0	0	0	1	-3.773	-4.779	FALSE	FALSE	FALSE	FALSE	FALSE	FALSE	FALSE	FALSE	FALSE	FALSE
ANKRD13A	NP_149112.1	0	0	0	1	-3.642	-4.6835	FALSE	FALSE	FALSE	FALSE	FALSE	FALSE	FALSE	FALSE	FALSE	FALSE
ANKRD13B	NP_689558.4	0	0	0	1	-4.3765	-4.7495	FALSE	FALSE	FALSE	FALSE	FALSE	FALSE	FALSE	FALSE	FALSE	FALSE
ANKRD30A	NP_443723.3	0	0	0	3		-4.97	FALSE	FALSE	FALSE	FALSE	FALSE	FALSE	FALSE	FALSE	FALSE	FALSE
ANKRD52	NP_775866.2	0	0	0	3	-3.557	-4.8335	FALSE	FALSE	FALSE	FALSE	FALSE	FALSE	FALSE	FALSE	FALSE	FALSE
ANKRD6	NP_001229738.1	0	0	1	0	-3.5175	-5.222	FALSE	FALSE	FALSE	FALSE	FALSE	FALSE	FALSE	FALSE	FALSE	FALSE
ANO3	NP_113606.2	0	0	0	1	-3.67	-4.762	FALSE	FALSE	FALSE	FALSE	FALSE	FALSE	FALSE	FALSE	FALSE	FALSE
ANO6	NP_001020527.2	0	0	0	1	-3.335	-4.7615	FALSE	FALSE	FALSE	FALSE	FALSE	FALSE	FALSE	FALSE	FALSE	FALSE
ANP32B	NP_006392.1	0	0	0	1		-4.685	FALSE	FALSE	FALSE	FALSE	FALSE	FALSE	FALSE	FALSE	FALSE	FALSE
ANTXR1	NP_115584.1	0	0	0	1		-4.749	FALSE	FALSE	FALSE	FALSE	FALSE	FALSE	TRUE	FALSE	FALSE	TRUE
AP1B1	NP_001118.3	0	0	0	1	-4.4135	-4.7045	FALSE	FALSE	FALSE	FALSE	FALSE	FALSE	TRUE	FALSE	FALSE	TRUE
AP1G1	NP_001025178.1	0	0	0	1	-5.0055	-4.7005	FALSE	FALSE	FALSE	FALSE	FALSE	FALSE	TRUE	FALSE	FALSE	TRUE
AP2A1	NP_055018.2	0	0	1	3	-4.782	-5.4695	FALSE	FALSE	FALSE	FALSE	FALSE	FALSE	FALSE	FALSE	FALSE	FALSE
AP2S1	NP_004060.2	0	0	2	3	-5.4135	-5.4615	TRUE	TRUE	TRUE	FALSE	FALSE	FALSE	TRUE	TRUE	TRUE	TRUE
AP3B2	NP_004635.2	0	0	0	1	-4.5605	-4.7975	FALSE	FALSE	FALSE	FALSE	FALSE	FALSE	TRUE	FALSE	FALSE	TRUE
AP3D1	NP_001248755.1	0	0	0	2	-3.7115	-4.7645	FALSE	FALSE	FALSE	FALSE	FALSE	FALSE	FALSE	FALSE	FALSE	FALSE
APBA1	NP_001154.2	0	0	1	0		-5.463	FALSE	FALSE	FALSE	FALSE	FALSE	FALSE	FALSE	FALSE	FALSE	FALSE
APBB2	NP_004298.1	0	0	1	1	-3.375	-5.379	FALSE	FALSE	FALSE	FALSE	FALSE	FALSE	FALSE	FALSE	FALSE	FALSE
APEX2	NP_055296.2	0	0	0	1	-3.8095	-4.7165	FALSE	FALSE	FALSE	FALSE	FALSE	FALSE	FALSE	FALSE	FALSE	FALSE
APLP2	NP_001633.1	0	0	0	1	-3.339	-4.86	FALSE	FALSE	FALSE	FALSE	FALSE	FALSE	FALSE	FALSE	FALSE	FALSE
APPBP2	NP_006371.2	0	0	0	1		-4.9225	FALSE	FALSE	FALSE	FALSE	FALSE	FALSE	FALSE	FALSE	FALSE	FALSE
AQR	NP_055506.1	0	0	0	1	-4.0585	-4.709	FALSE	FALSE	FALSE	FALSE	FALSE	FALSE	FALSE	FALSE	FALSE	FALSE
AR	NP_000035.2	0	0	0	2	-4.799	-4.9185	FALSE	FALSE	FALSE	FALSE	FALSE	FALSE	TRUE	FALSE	FALSE	TRUE
ARF3	NP_001650.1	0	0	0	1	-5.7195	-4.881	FALSE	TRUE	TRUE	FALSE	FALSE	FALSE	FALSE	FALSE	FALSE	FALSE
ARF4	NP_001651.1	0	0	0	2	-4.6895	-4.734	FALSE	FALSE	FALSE	FALSE	FALSE	FALSE	FALSE	FALSE	FALSE	FALSE
ARF6	NP_001654.1	0	0	1	1	-4.3805	-5.6475	FALSE	FALSE	FALSE	FALSE	FALSE	FALSE	FALSE	FALSE	FALSE	FALSE
ARHGAP1	NP_004299.1	0	0	0	1		-4.754	FALSE	FALSE	FALSE	FALSE	FALSE	FALSE	FALSE	FALSE	FALSE	FALSE
ARHGAP10	NP_078881.3	0	0	0	2	-3.3315	-4.66	FALSE	FALSE	FALSE	FALSE	FALSE	FALSE	FALSE	FALSE	FALSE	FALSE
ARHGAP18	NP_277050.2	0	0	0	2	-3.7285	-4.862	FALSE	FALSE	FALSE	FALSE	FALSE	FALSE	FALSE	FALSE	FALSE	FALSE
ARHGAP26	NP_055886.1	0	0	0	1	-3.5725	-4.953	FALSE	FALSE	FALSE	FALSE	FALSE	FALSE	FALSE	FALSE	FALSE	FALSE
ARHGAP32	NP_001136157.1	0	0	0	2	-3.8875	-4.9425	FALSE	FALSE	FALSE	FALSE	FALSE	FALSE	FALSE	FALSE	FALSE	FALSE
ARHGAP44	NP_055674.4	0	0	0	6	-3.4645	-4.989	FALSE	FALSE	FALSE	FALSE	FALSE	FALSE	FALSE	FALSE	FALSE	FALSE
ARHGAP6	NP_038286.2	0	0	1	1		-5.06	FALSE	FALSE	FALSE	FALSE	FALSE	FALSE	FALSE	FALSE	FALSE	FALSE
ARHGEF12	NP_056128.1	0	0	0	1	-3.186	-4.9495	FALSE	FALSE	FALSE	FALSE	FALSE	FALSE	FALSE	FALSE	FALSE	FALSE
ARHGEF18	NP_001354752.1	0	0	0	1	-4.2435	-4.6485	FALSE	FALSE	FALSE	FALSE	FALSE	FALSE	FALSE	FALSE	FALSE	FALSE
ARID4B	NP_001193723.1	0	0	1	0	-3.973	-5.4255	FALSE	FALSE	FALSE	FALSE	FALSE	FALSE	FALSE	FALSE	FALSE	FALSE
ARID5B	NP_115575.1	0	0	0	1	-3.796	-4.728	FALSE	FALSE	FALSE	FALSE	FALSE	FALSE	FALSE	FALSE	FALSE	FALSE
ARPC1A	NP_006400.2	0	0	0	1		-4.7605	FALSE	FALSE	FALSE	FALSE	FALSE	FALSE	FALSE	FALSE	FALSE	FALSE
ARPP21	NP_001254548.1	0	0	0	2	-3.8465	-4.7435	FALSE	FALSE	FALSE	FALSE	FALSE	FALSE	FALSE	FALSE	FALSE	FALSE
ARSL	NP_000038.2	0	0	0	4		-4.8245	FALSE	FALSE	FALSE	FALSE	FALSE	FALSE	TRUE	FALSE	FALSE	TRUE
ASPSCR1	NP_001238817.1	0	0	0	3	-3.2735	-5.0195	FALSE	FALSE	FALSE	FALSE	FALSE	FALSE	FALSE	FALSE	FALSE	FALSE
ATAD2	NP_054828.2	0	0	0	1	-3.67	-4.651	FALSE	FALSE	FALSE	FALSE	FALSE	FALSE	FALSE	FALSE	FALSE	FALSE
ATAD5	NP_079133.3	0	0	0	2	-4.4185	-4.8735	FALSE	FALSE	FALSE	FALSE	FALSE	FALSE	FALSE	FALSE	FALSE	FALSE
ATF2	NP_001243019.1	0	0	0	1	-5.2995	-4.7465	TRUE	TRUE	TRUE	FALSE	FALSE	FALSE	FALSE	FALSE	FALSE	FALSE
ATF7IP	NP_851997.1	0	0	0	2	-3.276	-4.6945	FALSE	FALSE	FALSE	FALSE	FALSE	FALSE	FALSE	FALSE	FALSE	FALSE
ATG2A	NP_055919.2	0	0	1	0	-4.001	-5.452	FALSE	FALSE	FALSE	FALSE	FALSE	FALSE	FALSE	FALSE	FALSE	FALSE
ATG9A	NP_001070666.1	0	0	0	1		-4.66	FALSE	FALSE	FALSE	FALSE	FALSE	FALSE	FALSE	FALSE	FALSE	FALSE
ATL1	NP_056999.2	0	0	0	2	-5.231	-4.8645	TRUE	TRUE	TRUE	FALSE	FALSE	FALSE	FALSE	FALSE	FALSE	TRUE
ATP13A1	NP_065143.2	0	0	0	2	-4.9475	-4.625	FALSE	FALSE	FALSE	FALSE	FALSE	FALSE	FALSE	FALSE	FALSE	FALSE
ATP13A3	NP_078800.3	0	0	0	1	-4.641	-4.6505	FALSE	FALSE	FALSE	FALSE	FALSE	FALSE	FALSE	FALSE	FALSE	FALSE
ATP2A2	NP_001672.1	0	0	1	2	-5.7755	-5.5725	FALSE	TRUE	TRUE	FALSE	FALSE	FALSE	FALSE	FALSE	FALSE	TRUE
ATP2B2	NP_001001331.1	0	0	0	2	-5.134	-4.662	TRUE	TRUE	TRUE	FALSE	FALSE	FALSE	FALSE	FALSE	FALSE	TRUE
ATP2B4	NP_001001396.1	0	0	0	1	-3.6335	-4.849	FALSE	FALSE	FALSE	FALSE	FALSE	FALSE	FALSE	FALSE	FALSE	FALSE
ATP2C1	NP_055197.2	0	0	0	1	-4.5175	-4.828	FALSE	FALSE	FALSE	FALSE	FALSE	FALSE	FALSE	FALSE	FALSE	FALSE
ATP6V1D	NP_057078.1	0	0	0	1	-3.656	-4.6955	FALSE	FALSE	FALSE	FALSE	FALSE	FALSE	FALSE	FALSE	FALSE	FALSE
ATP7A	NP_000043.4	0	0	0	5	-4.59	-4.653	FALSE	FALSE	FALSE	FALSE	FALSE	FALSE	TRUE	FALSE	FALSE	TRUE
ATP8A1	NP_006086.1	0	0	0	2	-4.3605	-4.844	FALSE	FALSE	FALSE	FALSE	FALSE	FALSE	FALSE	FALSE	FALSE	FALSE
ATP8B2	NP_001354863.1	0	0	0	1	-4.001	-4.6865	FALSE	FALSE	FALSE	FALSE	FALSE	FALSE	FALSE	FALSE	FALSE	FALSE
ATXN3	NP_004984.2	0	0	0	1	-3.5225	-4.847	FALSE	FALSE	FALSE	FALSE	FALSE	FALSE	FALSE	FALSE	FALSE	FALSE
ATXN7L3	NP_001369245.1	0	0	0	1	-4.178	-4.691	FALSE	FALSE	FALSE	FALSE	FALSE	FALSE	FALSE	FALSE	FALSE	FALSE
AURKB	NP_001271455.1	0	0	0	2	-3.471	-4.7145	FALSE	FALSE	FALSE	FALSE	FALSE	FALSE	FALSE	FALSE	FALSE	FALSE
AVIL	NP_006567.3	0	0	0	2	-3.412	-4.634	FALSE	FALSE	FALSE	FALSE	FALSE	FALSE	FALSE	FALSE	FALSE	FALSE
AVPR2	NP_000045.1	0	0	1	0	-3.272	-5.81	FALSE	FALSE	FALSE	FALSE	FALSE	FALSE	FALSE	FALSE	FALSE	TRUE
AWAT1	NP_001013597.1	0	0	0	12	-3.7815	-4.715	FALSE	FALSE	FALSE	FALSE	FALSE	FALSE	FALSE	FALSE	FALSE	FALSE
AXDND1	NP_653297.3	0	0	0	2	-3.2285	-4.6345	FALSE	FALSE	FALSE	FALSE	FALSE	FALSE	FALSE	FALSE	FALSE	FALSE
B3GALT1	NP_066191.1	0	0	0	1		-4.643	FALSE	FALSE	FALSE	FALSE	FALSE	FALSE	FALSE	FALSE	FALSE	FALSE
BACE1	NP_036236.1	0	0	1	2	-4.6895	-5.24	FALSE	FALSE	FALSE	FALSE	FALSE	FALSE	FALSE	FALSE	FALSE	FALSE
BCAP31	NP_001132913.1	0	0	0	1		-4.6395	FALSE	FALSE	FALSE	FALSE	FALSE	FALSE	TRUE	FALSE	FALSE	TRUE
BCL6	NP_001124317.1	0	0	0	3	-3.951	-4.912	FALSE	FALSE	FALSE	FALSE	FALSE	FALSE	FALSE	FALSE	FALSE	FALSE
BCORL1	NP_001366380.1	0	0	0	1	-3.901	-4.865	FALSE	FALSE	FALSE	FALSE	FALSE	FALSE	TRUE	FALSE	FALSE	TRUE
BDNF	NP_001137282.1	0	0	0	1		-4.6475	FALSE	FALSE	FALSE	FALSE	FALSE	FALSE	FALSE	FALSE	FALSE	FALSE
BMAL1	NP_001284648.1	0	0	0	1	-3.374	-4.795	FALSE	FALSE	FALSE	FALSE	FALSE	FALSE	FALSE	FALSE	FALSE	FALSE
BMP2	NP_001191.1	0	0	1	0	-3.399	-5.212	FALSE	FALSE	FALSE	FALSE	FALSE	FALSE	TRUE	FALSE	FALSE	TRUE
BMP4	NP_001193.2	0	0	0	1	-3.3955	-4.738	FALSE	FALSE	FALSE	FALSE	FALSE	FALSE	TRUE	FALSE	FALSE	TRUE
BMP7	NP_001710.1	0	0	0	1		-4.697	FALSE	FALSE	FALSE	FALSE	FALSE	FALSE	FALSE	FALSE	FALSE	FALSE
BMPR1B	NP_001194.1	0	0	0	1	-4.005	-4.771	FALSE	FALSE	FALSE	FALSE	FALSE	FALSE	TRUE	FALSE	FALSE	TRUE
BMPR2	NP_001195.2	0	0	0	1	-4.1795	-4.627	FALSE	FALSE	FALSE	FALSE	FALSE	FALSE	FALSE	FALSE	FALSE	FALSE
BNIP3L	NP_004322.1	0	0	0	1	-4.488	-4.7925	FALSE	FALSE	FALSE	FALSE	FALSE	FALSE	FALSE	FALSE	FALSE	FALSE
BRD1	NP_001291737.1	0	0	0	1	-3.6335	-4.7935	FALSE	FALSE	FALSE	FALSE	FALSE	FALSE	FALSE	FALSE	FALSE	FALSE
BRD3	NP_031397.1	0	0	1	0	-4.743	-5.243	FALSE	FALSE	FALSE	FALSE	FALSE	FALSE	FALSE	FALSE	FALSE	FALSE
BRD4	NP_490597.1	0	0	0	1	-5.2835	-4.813	FALSE	TRUE	TRUE	FALSE	FALSE	FALSE	TRUE	FALSE	FALSE	TRUE
BRME1	NP_077299.3	0	0	0	6	-3.1505	-4.786	FALSE	FALSE	FALSE	FALSE	FALSE	FALSE	FALSE	FALSE	FALSE	FALSE
BRMS1L	NP_115728.2	0	0	0	1	-3.7855	-4.9275	FALSE	FALSE	FALSE	FALSE	FALSE	FALSE	FALSE	FALSE	FALSE	FALSE
BRPF1	NP_001003694.1	0	0	1	1	-4.856	-5.575	FALSE	FALSE	FALSE	FALSE	FALSE	FALSE	TRUE	TRUE	FALSE	TRUE
BRSK2	NP_001243556.1	0	0	0	1	-3.7035	-4.682	FALSE	FALSE	FALSE	FALSE	FALSE	FALSE	TRUE	FALSE	FALSE	TRUE
BRWD3	NP_694984.5	0	0	0	3	-5.7735	-4.8875	FALSE	TRUE	TRUE	FALSE	FALSE	FALSE	TRUE	FALSE	FALSE	TRUE
BTBD8	NP_001363060.1	0	0	0	6		-4.793	FALSE	FALSE	FALSE	FALSE	FALSE	FALSE	FALSE	FALSE	FALSE	FALSE
BTD	NP_001357587.1	0	0	1	0	-3.174	-5.181	FALSE	FALSE	FALSE	FALSE	FALSE	FALSE	TRUE	FALSE	FALSE	TRUE
BTF3L4	NP_689478.1	0	0	0	1		-4.993	FALSE	FALSE	FALSE	FALSE	FALSE	FALSE	FALSE	FALSE	FALSE	FALSE
BTG1	NP_001722.1	0	0	2	0		-5.421	FALSE	FALSE	FALSE	FALSE	FALSE	FALSE	FALSE	FALSE	FALSE	FALSE
BTK	NP_000052.1	0	0	0	2	-5.731	-4.776	TRUE	TRUE	TRUE	FALSE	FALSE	FALSE	FALSE	FALSE	FALSE	FALSE
BZW1	NP_001193997.1	0	0	4	0	-3.6745	-5.119	FALSE	FALSE	FALSE	FALSE	FALSE	FALSE	FALSE	FALSE	FALSE	FALSE
BZW2	NP_001153239.1	0	0	0	3		-4.911	FALSE	FALSE	FALSE	FALSE	FALSE	FALSE	FALSE	FALSE	FALSE	FALSE
C19orf44	NP_115583.1	0	0	0	2	-4.0285	-4.652	FALSE	FALSE	FALSE	FALSE	FALSE	FALSE	FALSE	FALSE	FALSE	FALSE
C1GALT1	NP_064541.1	0	0	0	1		-4.8025	FALSE	FALSE	FALSE	FALSE	FALSE	FALSE	FALSE	FALSE	FALSE	FALSE
C1R	NP_001341275.1	0	0	0	22	-5	-4.98	FALSE	FALSE	FALSE	FALSE	FALSE	FALSE	FALSE	FALSE	FALSE	FALSE
C1orf127	NP_001164225.1	0	0	2	0	-3.003	-5.499	FALSE	FALSE	FALSE	FALSE	FALSE	FALSE	FALSE	FALSE	FALSE	FALSE
C4orf50	NP_001351618.1	0	0	0	2		-4.701	FALSE	FALSE	FALSE	FALSE	FALSE	FALSE	FALSE	FALSE	FALSE	FALSE
C8orf44-SGK3	NP_001191102.1	0	0	1	1		-5.1865	FALSE	FALSE	FALSE	FALSE	FALSE	FALSE	FALSE	FALSE	FALSE	FALSE
C9orf72	NP_060795.1	0	0	0	1	-3.5705	-4.6385	FALSE	FALSE	FALSE	FALSE	FALSE	FALSE	FALSE	FALSE	FALSE	FALSE
CACNA1F	NP_005174.2	0	0	0	2	-3.928	-4.893	FALSE	FALSE	FALSE	FALSE	FALSE	FALSE	FALSE	FALSE	FALSE	FALSE
CACNB2	NP_963884.2	0	0	0	1	-3.0395	-4.67	FALSE	FALSE	FALSE	FALSE	FALSE	FALSE	FALSE	FALSE	FALSE	FALSE
CACNB4	NP_000717.2	0	0	0	1		-4.6345	FALSE	FALSE	FALSE	FALSE	FALSE	FALSE	TRUE	FALSE	FALSE	TRUE
CACNG3	NP_006530.1	0	0	1	0	-4.2365	-5.4395	FALSE	FALSE	FALSE	FALSE	FALSE	FALSE	FALSE	FALSE	FALSE	FALSE
CACUL1	NP_722517.3	0	0	0	1	-2.833	-4.7705	FALSE	FALSE	FALSE	FALSE	FALSE	FALSE	FALSE	FALSE	FALSE	FALSE
CAD	NP_004332.2	0	0	0	1	-4.467	-4.689	FALSE	FALSE	FALSE	FALSE	FALSE	FALSE	TRUE	FALSE	FALSE	TRUE
CALR	NP_004334.1	0	0	0	1	-4.3245	-4.6605	FALSE	FALSE	FALSE	FALSE	FALSE	FALSE	FALSE	FALSE	FALSE	FALSE
CAMK2D	NP_742113.1	0	0	2	1	-4.7575	-5.5545	FALSE	FALSE	FALSE	FALSE	FALSE	FALSE	FALSE	FALSE	FALSE	FALSE
CAMK2G	NP_001307827.1	0	0	1	3	-5.43	-6.128	TRUE	TRUE	TRUE	FALSE	FALSE	FALSE	TRUE	TRUE	TRUE	TRUE
CAND1	NP_060918.2	0	0	0	2	-4.238	-4.8815	FALSE	FALSE	FALSE	FALSE	FALSE	FALSE	FALSE	FALSE	FALSE	FALSE
CANX	NP_001737.1	0	0	1	3		-5.5255	FALSE	FALSE	FALSE	FALSE	FALSE	FALSE	FALSE	FALSE	FALSE	FALSE
CAP2	NP_006357.1	0	0	0	1	-3.1285	-4.9025	FALSE	FALSE	FALSE	FALSE	FALSE	FALSE	FALSE	FALSE	FALSE	FALSE
CAPNS1	NP_001003962.1	0	0	0	1		-4.719	FALSE	FALSE	FALSE	FALSE	FALSE	FALSE	FALSE	FALSE	FALSE	FALSE
CBFA2T3	NP_005178.4	0	0	0	1	-3.025	-4.86	FALSE	FALSE	FALSE	FALSE	FALSE	FALSE	FALSE	FALSE	FALSE	FALSE
CBL	NP_005179.2	0	0	0	1	-4.636	-4.676	TRUE	FALSE	TRUE	FALSE	FALSE	FALSE	TRUE	TRUE	TRUE	TRUE
CBX1	NP_001120700.1	0	0	1	1		-5.141	FALSE	FALSE	FALSE	FALSE	FALSE	FALSE	FALSE	FALSE	FALSE	FALSE
CBX3	NP_009207.2	0	0	0	1	-4.522	-4.8315	FALSE	FALSE	FALSE	FALSE	FALSE	FALSE	FALSE	FALSE	FALSE	FALSE
CCDC146	NP_065930.2	0	0	0	1	-3.922	-4.6785	FALSE	FALSE	FALSE	FALSE	FALSE	FALSE	FALSE	FALSE	FALSE	FALSE
CCDC25	NP_060716.2	0	0	0	1	-2.7415	-4.84	FALSE	FALSE	FALSE	FALSE	FALSE	FALSE	FALSE	FALSE	FALSE	FALSE
CCDC6	NP_005427.2	0	0	0	1	-4.5405	-4.6905	FALSE	FALSE	FALSE	FALSE	FALSE	FALSE	FALSE	FALSE	FALSE	FALSE
CCDC73	NP_001008392.2	0	0	0	2	-3.8415	-4.6645	FALSE	FALSE	FALSE	FALSE	FALSE	FALSE	FALSE	FALSE	FALSE	FALSE
CCDC88A	NP_001129069.1	0	0	0	1	-3.723	-4.708	FALSE	FALSE	FALSE	FALSE	FALSE	FALSE	TRUE	FALSE	FALSE	TRUE
CCL13	NP_005399.1	0	0	0	3		-4.6485	FALSE	FALSE	FALSE	FALSE	FALSE	FALSE	FALSE	FALSE	FALSE	FALSE
CCND2	NP_001750.1	0	0	0	2	-2.959	-4.8315	FALSE	FALSE	FALSE	FALSE	FALSE	FALSE	TRUE	FALSE	FALSE	TRUE
CCNK	NP_001092872.1	0	0	0	1	-5.063	-4.695	FALSE	TRUE	TRUE	FALSE	FALSE	FALSE	TRUE	FALSE	FALSE	TRUE
CCNL1	NP_064703.1	0	0	0	1	-4.2165	-4.6965	FALSE	FALSE	FALSE	FALSE	FALSE	FALSE	FALSE	FALSE	FALSE	FALSE
CCR1	NP_001286.1	0	0	0	1	-4.066	-5.0205	FALSE	FALSE	FALSE	FALSE	FALSE	FALSE	FALSE	FALSE	FALSE	FALSE
CCT2	NP_006422.1	0	0	0	1	-3.966	-4.6565	FALSE	FALSE	FALSE	FALSE	FALSE	FALSE	FALSE	FALSE	FALSE	FALSE
CCT3	NP_005989.3	0	0	1	0	-3.922	-5.273	FALSE	FALSE	FALSE	FALSE	FALSE	FALSE	FALSE	FALSE	FALSE	FALSE
CCT8	NP_006576.2	0	0	0	3	-5.5445	-4.629	FALSE	TRUE	TRUE	FALSE	FALSE	FALSE	FALSE	FALSE	FALSE	FALSE
CD151	NP_004348.2	0	0	1	0	-3.533	-5.0955	FALSE	FALSE	FALSE	FALSE	FALSE	FALSE	TRUE	FALSE	FALSE	TRUE
CDC16	NP_001072113.1	0	0	0	1	-3.625	-4.788	FALSE	FALSE	FALSE	FALSE	FALSE	FALSE	FALSE	FALSE	FALSE	FALSE
CDC25A	NP_001780.2	0	0	0	1	-2.0775	-4.773	FALSE	FALSE	FALSE	FALSE	FALSE	FALSE	FALSE	FALSE	FALSE	FALSE
CDC40	NP_056975.1	0	0	0	1	-3.803	-4.7155	FALSE	FALSE	FALSE	FALSE	FALSE	FALSE	TRUE	FALSE	FALSE	TRUE
CDC5L	NP_001244.1	0	0	0	3	-3.523	-4.745	FALSE	FALSE	FALSE	FALSE	FALSE	FALSE	FALSE	FALSE	FALSE	FALSE
CDH11	NP_001788.2	0	0	0	1	-4.375	-5.016	FALSE	FALSE	FALSE	FALSE	FALSE	FALSE	TRUE	FALSE	FALSE	TRUE
CDH18	NP_004925.1	0	0	0	2	-3.118	-4.8075	FALSE	FALSE	FALSE	FALSE	FALSE	FALSE	FALSE	FALSE	FALSE	FALSE
CDH2	NP_001783.2	0	0	0	1	-4.981	-4.831	FALSE	FALSE	FALSE	FALSE	FALSE	FALSE	TRUE	FALSE	FALSE	TRUE
CDH6	NP_004923.1	0	0	0	2		-4.823	FALSE	FALSE	FALSE	FALSE	FALSE	FALSE	FALSE	FALSE	FALSE	FALSE
CDH8	NP_001787.2	0	0	0	1	-4.2185	-4.649	FALSE	FALSE	FALSE	FALSE	FALSE	FALSE	FALSE	FALSE	FALSE	FALSE
CDH9	NP_057363.3	0	0	0	2	-3.559	-4.749	FALSE	FALSE	FALSE	FALSE	FALSE	FALSE	FALSE	FALSE	FALSE	FALSE
CDK1	NP_001777.1	0	0	0	1	-3.1965	-4.634	FALSE	FALSE	FALSE	FALSE	FALSE	FALSE	FALSE	FALSE	FALSE	FALSE
CDK12	NP_057591.2	0	0	1	0	-4.117	-5.2275	FALSE	FALSE	FALSE	FALSE	FALSE	FALSE	FALSE	FALSE	FALSE	FALSE
CDK16	NP_006192.1	0	0	0	1		-4.8675	FALSE	FALSE	FALSE	FALSE	FALSE	FALSE	TRUE	FALSE	FALSE	TRUE
CDK4	NP_000066.1	0	0	0	1	-3.827	-4.661	FALSE	FALSE	FALSE	FALSE	FALSE	FALSE	FALSE	FALSE	FALSE	FALSE
CDK5	NP_004926.1	0	0	0	1	-4.149	-4.948	FALSE	FALSE	FALSE	FALSE	FALSE	FALSE	FALSE	FALSE	FALSE	FALSE
CDK7	NP_001790.1	0	0	0	1		-4.6345	FALSE	FALSE	FALSE	FALSE	FALSE	FALSE	FALSE	FALSE	FALSE	FALSE
CDS1	NP_001254.2	0	0	0	1	-4.213	-4.702	FALSE	FALSE	FALSE	FALSE	FALSE	FALSE	FALSE	FALSE	FALSE	FALSE
CDYL	NP_004815.3	0	0	1	1		-5.137	FALSE	FALSE	FALSE	FALSE	FALSE	FALSE	FALSE	FALSE	FALSE	FALSE
CEACAM1	NP_001703.2	0	0	0	2		-4.6265	FALSE	FALSE	FALSE	FALSE	FALSE	FALSE	FALSE	FALSE	FALSE	FALSE
CEACAM5	NP_004354.3	0	0	0	7		-5.024	FALSE	FALSE	FALSE	FALSE	FALSE	FALSE	FALSE	FALSE	FALSE	FALSE
CEBPZOS	NP_001309304.1	0	0	1	2		-5.2185	FALSE	FALSE	FALSE	FALSE	FALSE	FALSE	FALSE	FALSE	FALSE	FALSE
CELF1	NP_001166110.1	0	0	0	3		-4.8965	FALSE	FALSE	FALSE	FALSE	FALSE	FALSE	FALSE	FALSE	FALSE	FALSE
CELF3	NP_009116.3	0	0	0	1		-4.641	FALSE	FALSE	FALSE	FALSE	FALSE	FALSE	FALSE	FALSE	FALSE	FALSE
CELF4	NP_064565.1	0	0	0	1		-4.702	FALSE	FALSE	FALSE	FALSE	FALSE	FALSE	FALSE	FALSE	FALSE	FALSE
CELF5	NP_068757.2	0	0	0	1		-5.0135	FALSE	FALSE	FALSE	FALSE	FALSE	FALSE	FALSE	FALSE	FALSE	FALSE
CFL1	NP_005498.1	0	0	1	0		-5.162	FALSE	FALSE	FALSE	FALSE	FALSE	FALSE	FALSE	FALSE	FALSE	FALSE
CFL2	NP_068733.1	0	0	0	1		-4.667	FALSE	FALSE	FALSE	FALSE	FALSE	FALSE	TRUE	FALSE	FALSE	TRUE
CHAT	NP_066264.4	0	0	0	1	-3.306	-4.752	FALSE	FALSE	FALSE	FALSE	FALSE	FALSE	FALSE	FALSE	FALSE	FALSE
CHCHD4	NP_653237.1	0	0	1	0		-5.217	FALSE	FALSE	FALSE	FALSE	FALSE	FALSE	FALSE	FALSE	FALSE	FALSE
CHD5	NP_056372.1	0	0	1	1	-4.7225	-5.095	FALSE	FALSE	FALSE	FALSE	FALSE	FALSE	TRUE	FALSE	FALSE	TRUE
CHEK1	NP_001107593.1	0	0	0	4	-3.464	-4.832	FALSE	FALSE	FALSE	FALSE	FALSE	FALSE	FALSE	FALSE	FALSE	FALSE
CHMP5	NP_001182465.1	0	0	0	1		-4.713	FALSE	FALSE	FALSE	FALSE	FALSE	FALSE	FALSE	FALSE	FALSE	FALSE
CHST11	NP_060883.1	0	0	0	1	-3.714	-4.8085	FALSE	FALSE	FALSE	FALSE	FALSE	FALSE	FALSE	FALSE	FALSE	FALSE
CHSY1	NP_055733.2	0	0	0	1	-2.7655	-4.664	FALSE	FALSE	FALSE	FALSE	FALSE	FALSE	TRUE	FALSE	FALSE	TRUE
CIC	NP_055940.3	0	0	1	0	-4.9635	-5.512	FALSE	FALSE	FALSE	FALSE	FALSE	TRUE	TRUE	FALSE	FALSE	TRUE
CITED1	NP_001138357.1	0	0	0	1		-4.682	FALSE	FALSE	FALSE	FALSE	FALSE	FALSE	FALSE	FALSE	FALSE	FALSE
CKAP5	NP_001008938.1	0	0	2	0	-4.721	-5.161	FALSE	FALSE	FALSE	FALSE	FALSE	FALSE	FALSE	FALSE	FALSE	FALSE
CLASP2	NP_055912.2	0	0	1	11	-4.184	-5.1445	FALSE	FALSE	FALSE	FALSE	FALSE	FALSE	FALSE	FALSE	FALSE	FALSE
CLCN3	NP_776297.2	0	0	0	2	-4.6465	-4.886	FALSE	FALSE	FALSE	FALSE	FALSE	FALSE	TRUE	FALSE	FALSE	TRUE
CLCN5	NP_001121370.1	0	0	0	1		-4.828	FALSE	FALSE	FALSE	FALSE	FALSE	FALSE	FALSE	FALSE	FALSE	FALSE
CLDN10	NP_008915.1	0	0	0	1		-4.6665	FALSE	FALSE	FALSE	FALSE	FALSE	FALSE	FALSE	FALSE	FALSE	FALSE
CLDN11	NP_005593.2	0	0	0	1	-2.937	-4.711	FALSE	FALSE	FALSE	FALSE	FALSE	FALSE	FALSE	FALSE	FALSE	FALSE
CLINT1	NP_001182484.1	0	0	1	0		-5.253	FALSE	FALSE	FALSE	FALSE	FALSE	FALSE	FALSE	FALSE	FALSE	FALSE
CLPTM1L	NP_110409.2	0	0	0	1	-3.9995	-4.736	FALSE	FALSE	FALSE	FALSE	FALSE	FALSE	FALSE	FALSE	FALSE	FALSE
CLSPN	NP_001177410.1	0	0	0	1	-3.8455	-4.6585	FALSE	FALSE	FALSE	FALSE	FALSE	FALSE	FALSE	FALSE	FALSE	FALSE
CLSTN1	NP_001009566.1	0	0	0	1	-3.0785	-4.7695	FALSE	FALSE	FALSE	FALSE	FALSE	FALSE	FALSE	FALSE	FALSE	FALSE
CMIP	NP_938204.2	0	0	1	0	-3.817	-5.4365	FALSE	FALSE	FALSE	FALSE	FALSE	FALSE	FALSE	FALSE	FALSE	FALSE
CNGA1	NP_000078.3	0	0	0	3	-2.988	-4.874	FALSE	FALSE	FALSE	FALSE	FALSE	FALSE	FALSE	FALSE	FALSE	FALSE
CNGA2	NP_005131.1	0	0	0	1	-3.398	-4.66	FALSE	FALSE	FALSE	FALSE	FALSE	FALSE	FALSE	FALSE	FALSE	FALSE
CNN3	NP_001830.1	0	0	0	1		-4.7435	FALSE	FALSE	FALSE	FALSE	FALSE	FALSE	FALSE	FALSE	FALSE	FALSE
CNNM2	NP_060119.3	0	0	1	2	-4.9735	-5.142	FALSE	FALSE	FALSE	FALSE	FALSE	FALSE	TRUE	FALSE	FALSE	TRUE
CNOT11	NP_060016.3	0	0	0	1	-3.441	-4.681	FALSE	FALSE	FALSE	FALSE	FALSE	FALSE	FALSE	FALSE	FALSE	FALSE
CNOT6	NP_001357401.1	0	0	1	1		-5.2635	FALSE	FALSE	FALSE	FALSE	FALSE	FALSE	FALSE	FALSE	FALSE	FALSE
CNOT6L	NP_001273719.1	0	0	1	0	-3.217	-5.712	FALSE	FALSE	FALSE	FALSE	FALSE	FALSE	FALSE	FALSE	FALSE	FALSE
CNOT7	NP_001309018.1	0	0	0	1	-4.7735	-4.7845	FALSE	FALSE	FALSE	FALSE	FALSE	FALSE	FALSE	FALSE	FALSE	FALSE
COG3	NP_113619.3	0	0	0	1		-4.82	FALSE	FALSE	FALSE	FALSE	FALSE	FALSE	FALSE	FALSE	FALSE	FALSE
COL1A2	NP_000080.2	0	0	1	0	-4.5655	-5.101	FALSE	FALSE	FALSE	FALSE	FALSE	FALSE	FALSE	FALSE	FALSE	FALSE
COL5A1	NP_000084.3	0	0	0	1	-3.7565	-4.626	FALSE	FALSE	FALSE	FALSE	FALSE	FALSE	FALSE	FALSE	FALSE	FALSE
COPA	NP_004362.2	0	0	0	1	-3.7815	-4.7575	FALSE	FALSE	FALSE	FALSE	FALSE	FALSE	FALSE	FALSE	FALSE	FALSE
COPG2	NP_036265.3	0	0	0	10		-4.9765	FALSE	FALSE	FALSE	FALSE	FALSE	FALSE	FALSE	FALSE	FALSE	FALSE
COPS2	NP_001137359.1	0	0	1	0	-6.0835	-6.1185	FALSE	TRUE	TRUE	FALSE	FALSE	FALSE	FALSE	FALSE	FALSE	FALSE
COPS5	NP_006828.2	0	0	0	2		-4.783	FALSE	FALSE	FALSE	FALSE	FALSE	FALSE	FALSE	FALSE	FALSE	FALSE
CPEB2	NP_001170853.1	0	0	0	1	-4.227	-4.6965	FALSE	FALSE	FALSE	FALSE	FALSE	FALSE	FALSE	FALSE	FALSE	FALSE
CPEB3	NP_055727.3	0	0	0	1		-4.8125	FALSE	FALSE	FALSE	FALSE	FALSE	FALSE	FALSE	FALSE	FALSE	FALSE
CPEB4	NP_001295120.1	0	0	0	2	-4.7955	-4.96	FALSE	FALSE	FALSE	FALSE	FALSE	FALSE	FALSE	FALSE	FALSE	FALSE
CPNE2	NP_689940.3	0	0	0	2		-4.6665	FALSE	FALSE	FALSE	FALSE	FALSE	FALSE	FALSE	FALSE	FALSE	FALSE
CPSF2	NP_059133.1	0	0	0	2		-4.6895	FALSE	FALSE	FALSE	FALSE	FALSE	FALSE	FALSE	FALSE	FALSE	FALSE
CPSF3	NP_057291.1	0	0	0	1		-4.6185	FALSE	FALSE	FALSE	FALSE	FALSE	FALSE	TRUE	FALSE	FALSE	TRUE
CPT1A	NP_001867.2	0	0	0	1		-4.656	FALSE	FALSE	FALSE	FALSE	FALSE	FALSE	FALSE	FALSE	FALSE	FALSE
CRACDL	NP_997245.2	0	0	1	0	-3.186	-5.1085	FALSE	FALSE	FALSE	FALSE	FALSE	FALSE	FALSE	FALSE	FALSE	FALSE
CREBL2	NP_001301.1	0	0	0	1		-4.748	FALSE	FALSE	FALSE	FALSE	FALSE	FALSE	FALSE	FALSE	FALSE	FALSE
CRLF1	NP_004741.1	0	0	0	1	-2.9415	-4.645	FALSE	FALSE	FALSE	FALSE	FALSE	FALSE	FALSE	FALSE	FALSE	FALSE
CRTC1	NP_001091952.1	0	0	0	1	-3.42	-4.8425	FALSE	FALSE	FALSE	FALSE	FALSE	FALSE	FALSE	FALSE	FALSE	FALSE
CRY2	NP_066940.3	0	0	1	1	-3.2025	-5.181	FALSE	FALSE	FALSE	FALSE	FALSE	FALSE	FALSE	FALSE	FALSE	FALSE
CRYBA1	NP_005199.2	0	0	0	1		-4.6825	FALSE	FALSE	FALSE	FALSE	FALSE	FALSE	TRUE	FALSE	FALSE	TRUE
CS	NP_004068.2	0	0	0	2		-4.715	FALSE	FALSE	FALSE	FALSE	FALSE	FALSE	FALSE	FALSE	FALSE	FALSE
CSF3R	NP_000751.1	0	0	0	1	-3.919	-4.7105	FALSE	FALSE	FALSE	FALSE	FALSE	FALSE	FALSE	FALSE	FALSE	FALSE
CSNK1A1	NP_001258671.1	0	0	3	0	-5.175	-5.603	FALSE	TRUE	TRUE	FALSE	FALSE	FALSE	FALSE	FALSE	FALSE	FALSE
CSTF2	NP_001316.1	0	0	0	2		-4.689	FALSE	FALSE	FALSE	FALSE	FALSE	FALSE	FALSE	FALSE	FALSE	FALSE
CSTF3	NP_001317.1	0	0	1	2	-4.895	-5.24	FALSE	FALSE	FALSE	FALSE	FALSE	FALSE	FALSE	FALSE	FALSE	FALSE
CTDSPL	NP_005799.2	0	0	2	0		-5.405	FALSE	FALSE	FALSE	FALSE	FALSE	FALSE	FALSE	FALSE	FALSE	FALSE
CTNNA2	NP_001158355.1	0	0	0	1	-4.3985	-4.6215	FALSE	FALSE	FALSE	FALSE	FALSE	FALSE	TRUE	FALSE	FALSE	TRUE
CTPS1	NP_001896.2	0	0	0	1	-4.9875	-4.996	FALSE	FALSE	FALSE	FALSE	FALSE	FALSE	FALSE	FALSE	FALSE	FALSE
CTR9	NP_055448.1	0	0	0	2	-4.455	-4.939	FALSE	FALSE	FALSE	FALSE	FALSE	FALSE	FALSE	FALSE	FALSE	FALSE
CUL1	NP_003583.2	0	0	0	2	-3.751	-4.7115	FALSE	FALSE	FALSE	FALSE	FALSE	FALSE	FALSE	FALSE	FALSE	FALSE
CUL2	NP_001185707.1	0	0	0	3	-4.857	-4.8175	FALSE	FALSE	FALSE	FALSE	FALSE	FALSE	FALSE	FALSE	FALSE	FALSE
CUL3	NP_003581.1	0	0	1	0	-4.2	-5.3625	FALSE	FALSE	FALSE	FALSE	FALSE	FALSE	TRUE	FALSE	FALSE	TRUE
CWF19L2	NP_689647.2	0	0	0	5	-3.9215	-4.6815	FALSE	FALSE	FALSE	FALSE	FALSE	FALSE	FALSE	FALSE	FALSE	FALSE
CXXC1	NP_001095124.1	0	0	0	1	-4.407	-4.7565	FALSE	FALSE	FALSE	FALSE	FALSE	FALSE	FALSE	FALSE	FALSE	FALSE
CXXC4	NP_079488.2	0	0	2	0	-3.123	-5.34	FALSE	FALSE	FALSE	FALSE	FALSE	FALSE	FALSE	FALSE	FALSE	FALSE
CYBB	NP_000388.2	0	0	2	0	-5.4385	-5.2485	FALSE	TRUE	TRUE	FALSE	FALSE	FALSE	FALSE	FALSE	FALSE	FALSE
CYBC1	NP_001028218.1	0	0	1	0	-2.9795	-5.13	FALSE	FALSE	FALSE	FALSE	FALSE	FALSE	FALSE	FALSE	FALSE	FALSE
CYLD	NP_056062.1	0	0	0	1		-4.9115	FALSE	FALSE	FALSE	FALSE	FALSE	FALSE	FALSE	FALSE	FALSE	FALSE
CYP11A1	NP_000772.2	0	0	0	1	-3.333	-4.805	FALSE	FALSE	FALSE	FALSE	FALSE	FALSE	FALSE	FALSE	FALSE	FALSE
CYP2E1	NP_000764.1	0	0	0	1		-4.7525	FALSE	FALSE	FALSE	FALSE	FALSE	FALSE	FALSE	FALSE	FALSE	FALSE
CYP3A4	NP_059488.2	0	0	0	1		-4.699	FALSE	FALSE	FALSE	FALSE	FALSE	FALSE	FALSE	FALSE	FALSE	FALSE
CYRIA	NP_110424.1	0	0	0	1		-4.6765	FALSE	FALSE	FALSE	FALSE	FALSE	FALSE	FALSE	FALSE	FALSE	FALSE
CYRIB	NP_001243692.1	0	0	0	1	-3.835	-4.8855	FALSE	FALSE	FALSE	FALSE	FALSE	FALSE	FALSE	FALSE	FALSE	FALSE
CYTH1	NP_004753.1	0	0	0	1	-3.708	-4.6215	FALSE	FALSE	FALSE	FALSE	FALSE	FALSE	FALSE	FALSE	FALSE	FALSE
CYTH3	NP_004218.1	0	0	1	0		-5.224	FALSE	FALSE	FALSE	FALSE	FALSE	FALSE	FALSE	FALSE	FALSE	FALSE
DACH1	NP_001353641.1	0	0	0	1	-3.8955	-4.9205	FALSE	FALSE	FALSE	FALSE	FALSE	FALSE	FALSE	FALSE	FALSE	FALSE
DAZAP1	NP_061832.2	0	0	0	1	-4.3915	-4.84	FALSE	FALSE	FALSE	FALSE	FALSE	FALSE	FALSE	FALSE	FALSE	FALSE
DAZL	NP_001342.2	0	0	0	1		-4.9165	FALSE	FALSE	FALSE	FALSE	FALSE	FALSE	FALSE	FALSE	FALSE	FALSE
DCAF1	NP_055518.1	0	0	4	0	-4.041	-5.3515	FALSE	FALSE	FALSE	FALSE	FALSE	FALSE	FALSE	FALSE	FALSE	FALSE
DCAF12L1	NP_848565.2	0	0	0	7	-2.707	-4.881	FALSE	FALSE	FALSE	FALSE	FALSE	FALSE	FALSE	FALSE	FALSE	FALSE
DCAF12L2	NP_001013650.1	0	0	0	4	-3.153	-4.668	FALSE	FALSE	FALSE	FALSE	FALSE	FALSE	FALSE	FALSE	FALSE	FALSE
DCAF8	NP_056541.2	0	0	0	1		-4.6655	FALSE	FALSE	FALSE	FALSE	FALSE	FALSE	FALSE	FALSE	FALSE	FALSE
DCAF8L1	NP_001017930.1	0	0	0	1		-4.622	FALSE	FALSE	FALSE	FALSE	FALSE	FALSE	FALSE	FALSE	FALSE	FALSE
DCP1B	NP_689853.3	0	0	0	1		-4.807	FALSE	FALSE	FALSE	FALSE	FALSE	FALSE	FALSE	FALSE	FALSE	FALSE
DCTN1	NP_004073.2	0	0	0	2	-3.281	-4.9205	FALSE	FALSE	FALSE	FALSE	FALSE	FALSE	FALSE	FALSE	FALSE	FALSE
DCUN1D1	NP_065691.2	0	0	0	1		-4.927	FALSE	FALSE	FALSE	FALSE	FALSE	FALSE	FALSE	FALSE	FALSE	FALSE
DCUN1D3	NP_775746.1	0	0	0	1		-4.6995	FALSE	FALSE	FALSE	FALSE	FALSE	FALSE	FALSE	FALSE	FALSE	FALSE
DCUN1D4	NP_001274684.1	0	0	0	2		-4.783	FALSE	FALSE	FALSE	FALSE	FALSE	FALSE	FALSE	FALSE	FALSE	FALSE
DDOST	NP_005207.3	0	0	1	0		-5.34	FALSE	FALSE	FALSE	FALSE	FALSE	FALSE	TRUE	FALSE	FALSE	TRUE
DDT	NP_001077861.1	0	0	0	9		-5.009	FALSE	FALSE	FALSE	FALSE	FALSE	FALSE	FALSE	FALSE	FALSE	FALSE
DDX1	NP_004930.1	0	0	0	1	-3.6175	-4.7235	FALSE	FALSE	FALSE	FALSE	FALSE	FALSE	FALSE	FALSE	FALSE	FALSE
DDX17	NP_001091974.1	0	0	0	1	-5.891	-4.882	FALSE	TRUE	TRUE	FALSE	FALSE	FALSE	FALSE	FALSE	FALSE	FALSE
DDX18	NP_006764.3	0	0	0	1	-3.814	-5.0335	FALSE	FALSE	FALSE	FALSE	FALSE	FALSE	FALSE	FALSE	FALSE	FALSE
DDX27	NP_001335116.2	0	0	0	1	-4.6675	-4.9505	FALSE	FALSE	FALSE	FALSE	FALSE	FALSE	FALSE	FALSE	FALSE	FALSE
DDX39A	NP_005795.2	0	0	0	2	-3.5855	-4.797	FALSE	FALSE	FALSE	FALSE	FALSE	FALSE	FALSE	FALSE	FALSE	FALSE
DDX4	NP_077726.1	0	0	0	1	-4.1675	-4.788	FALSE	FALSE	FALSE	FALSE	FALSE	FALSE	FALSE	FALSE	FALSE	FALSE
DDX43	NP_061135.2	0	0	0	4		-4.799	FALSE	FALSE	FALSE	FALSE	FALSE	FALSE	FALSE	FALSE	FALSE	FALSE
DDX6	NP_004388.2	0	0	1	1	-5.805	-5.1495	TRUE	TRUE	TRUE	FALSE	FALSE	FALSE	TRUE	FALSE	FALSE	TRUE
DEPTOR	NP_073620.2	0	0	0	3		-4.6205	FALSE	FALSE	FALSE	FALSE	FALSE	FALSE	FALSE	FALSE	FALSE	FALSE
DERPC	NP_001353531.1	0	0	0	4		-4.8245	FALSE	FALSE	FALSE	FALSE	FALSE	FALSE	FALSE	FALSE	FALSE	FALSE
DFFB	NP_001307061.1	0	0	0	1	-3.434	-4.926	FALSE	FALSE	FALSE	FALSE	FALSE	FALSE	FALSE	FALSE	FALSE	FALSE
DGKD	NP_690618.2	0	0	0	1	-3.021	-4.7135	FALSE	FALSE	FALSE	FALSE	FALSE	FALSE	FALSE	FALSE	FALSE	FALSE
DGKH	NP_821077.1	0	0	0	1	-4.496	-4.6835	FALSE	FALSE	FALSE	FALSE	FALSE	FALSE	FALSE	FALSE	FALSE	FALSE
DGKI	NP_001308639.1	0	0	0	1		-4.703	FALSE	FALSE	FALSE	FALSE	FALSE	FALSE	FALSE	FALSE	FALSE	FALSE
DGKZ	NP_001099010.1	0	0	0	1	-3.9695	-4.644	FALSE	FALSE	FALSE	FALSE	FALSE	FALSE	FALSE	FALSE	FALSE	FALSE
DHX16	NP_003578.2	0	0	1	0	-5.3165	-5.2525	FALSE	TRUE	TRUE	FALSE	FALSE	FALSE	TRUE	FALSE	FALSE	TRUE
DHX37	NP_116045.2	0	0	0	4	-4.4675	-4.915	FALSE	FALSE	FALSE	FALSE	FALSE	FALSE	TRUE	FALSE	FALSE	TRUE
DHX8	NP_004932.1	0	0	1	0	-5.143	-5.085	FALSE	TRUE	TRUE	FALSE	FALSE	FALSE	FALSE	FALSE	FALSE	FALSE
DIP2C	NP_055789.1	0	0	0	1	-3.8515	-4.8005	FALSE	FALSE	FALSE	FALSE	FALSE	FALSE	FALSE	FALSE	FALSE	FALSE
DIPK1A	NP_001006606.2	0	0	0	1		-4.628	FALSE	FALSE	FALSE	FALSE	FALSE	FALSE	FALSE	FALSE	FALSE	FALSE
DIS3L2	NP_689596.4	0	0	0	1	-3.4555	-4.6805	FALSE	FALSE	FALSE	FALSE	FALSE	FALSE	TRUE	FALSE	FALSE	TRUE
DKC1	NP_001275676.1	0	0	2	1	-4.8385	-5.6525	FALSE	FALSE	FALSE	FALSE	FALSE	FALSE	TRUE	FALSE	FALSE	TRUE
DLG2	NP_001136171.1	0	0	0	2		-4.686	FALSE	FALSE	FALSE	FALSE	FALSE	FALSE	FALSE	FALSE	FALSE	FALSE
DLG3	NP_066943.2	0	0	1	0		-5.783	FALSE	FALSE	FALSE	FALSE	FALSE	FALSE	TRUE	FALSE	FALSE	TRUE
DLG4	NP_001356.1	0	0	0	1	-3.698	-4.7555	FALSE	FALSE	FALSE	FALSE	FALSE	FALSE	TRUE	TRUE	FALSE	TRUE
DLK2	NP_076421.2	0	0	0	4	-3.9485	-4.6515	FALSE	FALSE	FALSE	FALSE	FALSE	FALSE	FALSE	FALSE	FALSE	FALSE
DLL4	NP_061947.1	0	0	0	1		-5.0295	FALSE	FALSE	FALSE	FALSE	FALSE	FALSE	TRUE	FALSE	FALSE	TRUE
DNAJC11	NP_060668.2	0	0	0	2	-3.3825	-4.773	FALSE	FALSE	FALSE	FALSE	FALSE	FALSE	FALSE	FALSE	FALSE	FALSE
DNAJC6	NP_001243793.1	0	0	0	1	-4.094	-4.814	FALSE	FALSE	FALSE	FALSE	FALSE	FALSE	FALSE	FALSE	FALSE	FALSE
DNAJC7	NP_003306.3	0	0	1	0		-5.1115	FALSE	FALSE	FALSE	FALSE	FALSE	FALSE	FALSE	FALSE	FALSE	FALSE
DNM2	NP_004936.2	0	0	0	2	-3.841	-5.022	FALSE	FALSE	FALSE	FALSE	FALSE	FALSE	FALSE	FALSE	FALSE	FALSE
DNM3	NP_056384.2	0	0	0	1		-4.68	FALSE	FALSE	FALSE	FALSE	FALSE	FALSE	FALSE	FALSE	FALSE	FALSE
DNMT3B	NP_008823.1	0	0	2	2	-3.444	-5.154	FALSE	FALSE	FALSE	FALSE	FALSE	FALSE	TRUE	FALSE	FALSE	TRUE
DOC2B	NP_003576.2	0	0	0	1	-3.3445	-4.623	FALSE	FALSE	FALSE	FALSE	FALSE	FALSE	FALSE	FALSE	FALSE	FALSE
DOK6	NP_689934.2	0	0	1	0	-4.1775	-5.0635	FALSE	FALSE	FALSE	FALSE	FALSE	FALSE	FALSE	FALSE	FALSE	FALSE
DOT1L	NP_115871.1	0	0	1	0	-4.093	-5.4185	FALSE	FALSE	FALSE	FALSE	FALSE	FALSE	FALSE	FALSE	FALSE	FALSE
DPAGT1	NP_001373.2	0	0	0	2		-4.7815	FALSE	FALSE	FALSE	FALSE	FALSE	FALSE	TRUE	FALSE	FALSE	TRUE
DPP8	NP_001307804.1	0	0	1	0	-3.9105	-5.2125	FALSE	FALSE	FALSE	FALSE	FALSE	FALSE	FALSE	FALSE	FALSE	FALSE
DPYSL2	NP_001377.1	0	0	0	7		-4.813	FALSE	FALSE	FALSE	FALSE	FALSE	FALSE	FALSE	FALSE	FALSE	FALSE
DTNA	NP_116760.2	0	0	0	1	-4.145	-4.626	FALSE	FALSE	FALSE	FALSE	FALSE	FALSE	FALSE	FALSE	FALSE	FALSE
DTNB	NP_068707.1	0	0	1	0		-5.154	FALSE	FALSE	FALSE	FALSE	FALSE	FALSE	FALSE	FALSE	FALSE	FALSE
DUSP7	NP_001938.2	0	0	0	1		-4.8165	FALSE	FALSE	FALSE	FALSE	FALSE	FALSE	FALSE	FALSE	FALSE	FALSE
DUSP9	NP_001386.1	0	0	0	2		-4.6555	FALSE	FALSE	FALSE	FALSE	FALSE	FALSE	FALSE	FALSE	FALSE	FALSE
DYM	NP_060123.3	0	0	0	1	-3.1765	-4.7755	FALSE	FALSE	FALSE	FALSE	FALSE	FALSE	TRUE	FALSE	FALSE	TRUE
DYNLL1	NP_001032583.1	0	0	0	1		-4.6335	FALSE	FALSE	FALSE	FALSE	FALSE	FALSE	FALSE	FALSE	FALSE	FALSE
DYNLRB1	NP_001306086.1	0	0	0	1	-3.084	-4.6895	FALSE	FALSE	FALSE	FALSE	FALSE	FALSE	FALSE	FALSE	FALSE	FALSE
DYRK2	NP_006473.2	0	0	0	1	-3.5655	-4.6335	FALSE	FALSE	FALSE	FALSE	FALSE	FALSE	FALSE	FALSE	FALSE	FALSE
EBP	NP_006570.1	0	0	2	1	-4.7195	-5.363	FALSE	FALSE	FALSE	FALSE	FALSE	FALSE	TRUE	FALSE	FALSE	TRUE
ECPAS	NP_001351860.1	0	0	0	1	-4.016	-5.0515	FALSE	FALSE	FALSE	FALSE	FALSE	FALSE	FALSE	FALSE	FALSE	FALSE
ECSCR	NP_001071161.1	0	0	0	2	-4.646	-4.8505	FALSE	FALSE	FALSE	FALSE	FALSE	FALSE	FALSE	FALSE	FALSE	FALSE
EDNRA	NP_001948.1	0	0	4	1	-3.6205	-5.54	FALSE	FALSE	FALSE	FALSE	FALSE	FALSE	TRUE	FALSE	FALSE	TRUE
EDNRB	NP_003982.1	0	0	1	0	-3.1155	-5.259	FALSE	FALSE	FALSE	FALSE	FALSE	FALSE	TRUE	FALSE	FALSE	TRUE
EED	NP_003788.2	0	0	0	1	-4.288	-5.0245	FALSE	FALSE	FALSE	FALSE	FALSE	FALSE	TRUE	FALSE	FALSE	TRUE
EEF1G	NP_001395.1	0	0	0	1	-4.463	-4.7355	FALSE	FALSE	FALSE	FALSE	FALSE	FALSE	FALSE	FALSE	FALSE	FALSE
EFHC2	NP_079460.2	0	0	0	2		-4.88	FALSE	FALSE	FALSE	FALSE	FALSE	FALSE	FALSE	FALSE	FALSE	FALSE
EFNB2	NP_004084.1	0	0	0	1		-4.6715	FALSE	FALSE	FALSE	FALSE	FALSE	FALSE	FALSE	FALSE	FALSE	FALSE
EGR1	NP_001955.1	0	0	0	1	-3.269	-4.6765	FALSE	FALSE	FALSE	FALSE	FALSE	FALSE	FALSE	FALSE	FALSE	FALSE
EI24	NP_004870.3	0	0	0	1	-2.744	-4.958	FALSE	FALSE	FALSE	FALSE	FALSE	FALSE	FALSE	FALSE	FALSE	FALSE
EIF2B2	NP_055054.1	0	0	0	10	-3.125	-4.8335	FALSE	FALSE	FALSE	FALSE	FALSE	FALSE	FALSE	FALSE	FALSE	FALSE
EIF3D	NP_003744.1	0	0	0	1	-3.437	-4.6675	FALSE	FALSE	FALSE	FALSE	FALSE	FALSE	FALSE	FALSE	FALSE	FALSE
EIF4A3	NP_055555.1	0	0	0	3	-5.7135	-4.8475	FALSE	TRUE	TRUE	FALSE	FALSE	FALSE	TRUE	FALSE	FALSE	TRUE
EIF4E2	NP_004837.1	0	0	0	1		-4.7205	FALSE	FALSE	FALSE	FALSE	FALSE	FALSE	FALSE	FALSE	FALSE	FALSE
EIF4G1	NP_937885.1	0	0	0	1	-3.74	-4.6235	FALSE	FALSE	FALSE	FALSE	FALSE	FALSE	FALSE	FALSE	FALSE	FALSE
EIF4G3	NP_001185730.1	0	0	0	1		-4.942	FALSE	FALSE	FALSE	FALSE	FALSE	FALSE	FALSE	FALSE	FALSE	FALSE
EIF5	NP_001960.2	0	0	1	0	-4.4335	-5.2025	FALSE	FALSE	FALSE	FALSE	FALSE	FALSE	FALSE	FALSE	FALSE	FALSE
EIF5B	NP_056988.3	0	0	0	2	-5.7585	-4.8715	FALSE	TRUE	TRUE	FALSE	FALSE	FALSE	FALSE	FALSE	FALSE	FALSE
ELAPOR1	NP_065826.3	0	0	0	1	-4.089	-4.7415	FALSE	FALSE	FALSE	FALSE	FALSE	FALSE	FALSE	FALSE	FALSE	FALSE
ELAPOR2	NP_001136221.1	0	0	0	1	-4.3195	-4.921	FALSE	FALSE	FALSE	FALSE	FALSE	FALSE	FALSE	FALSE	FALSE	FALSE
ELAVL2	NP_001338384.1	0	0	1	0	-3.3045	-5.6	FALSE	FALSE	FALSE	FALSE	FALSE	FALSE	FALSE	FALSE	FALSE	FALSE
ELAVL3	NP_001411.2	0	0	1	0	-4.593	-5.075	FALSE	FALSE	FALSE	FALSE	FALSE	FALSE	FALSE	FALSE	FALSE	FALSE
ELF4	NP_001412.1	0	0	0	3	-3.909	-4.996	FALSE	FALSE	FALSE	FALSE	FALSE	FALSE	FALSE	FALSE	FALSE	FALSE
ELK1	NP_005220.2	0	0	0	2	-2.878	-4.755	FALSE	FALSE	FALSE	FALSE	FALSE	FALSE	FALSE	FALSE	FALSE	FALSE
ELL2	NP_036213.2	0	0	0	2	-3.6375	-4.698	FALSE	FALSE	FALSE	FALSE	FALSE	FALSE	FALSE	FALSE	FALSE	FALSE
ELMO1	NP_001193409.1	0	0	1	0	-4.485	-6.017	FALSE	FALSE	FALSE	FALSE	FALSE	FALSE	FALSE	FALSE	FALSE	FALSE
ELOVL6	NP_001124193.1	0	0	1	0		-5.177	FALSE	FALSE	FALSE	FALSE	FALSE	FALSE	FALSE	FALSE	FALSE	FALSE
ELP3	NP_060561.3	0	0	0	6	-3.976	-4.8725	FALSE	FALSE	FALSE	FALSE	FALSE	FALSE	FALSE	FALSE	FALSE	FALSE
EML1	NP_004425.2	0	0	0	1	-4.3775	-4.9605	FALSE	FALSE	FALSE	FALSE	FALSE	FALSE	FALSE	FALSE	FALSE	FALSE
EMX2	NP_004089.1	0	0	0	1		-4.6215	FALSE	FALSE	FALSE	FALSE	FALSE	FALSE	TRUE	FALSE	FALSE	TRUE
ENY2	NP_001180486.1	0	0	0	2	-2.536	-4.7485	FALSE	FALSE	FALSE	FALSE	FALSE	FALSE	FALSE	FALSE	FALSE	FALSE
EPB41L1	NP_036288.2	0	0	0	1	-4.406	-4.682	FALSE	FALSE	FALSE	FALSE	FALSE	FALSE	TRUE	FALSE	FALSE	TRUE
EPC1	NP_079485.1	0	0	1	0	-3.497	-5.282	FALSE	FALSE	FALSE	FALSE	FALSE	FALSE	FALSE	FALSE	FALSE	FALSE
EPHA7	NP_004431.1	0	0	0	1	-4.086	-4.7505	FALSE	FALSE	FALSE	FALSE	FALSE	FALSE	FALSE	FALSE	FALSE	FALSE
EPHB2	NP_001296122.1	0	0	0	4	-4.1755	-4.836	FALSE	FALSE	FALSE	FALSE	FALSE	FALSE	FALSE	FALSE	FALSE	FALSE
EPM2AIP1	NP_055620.1	0	0	0	1	-3.39	-4.7325	FALSE	FALSE	FALSE	FALSE	FALSE	FALSE	FALSE	FALSE	FALSE	FALSE
ERCC3	NP_000113.1	0	0	0	1	-3.8775	-4.654	FALSE	FALSE	FALSE	FALSE	FALSE	FALSE	TRUE	FALSE	FALSE	TRUE
ERCC6L	NP_060139.2	0	0	0	2	-4.251	-4.6405	FALSE	FALSE	FALSE	FALSE	FALSE	FALSE	FALSE	FALSE	FALSE	FALSE
ERLIN1	NP_006450.2	0	0	0	1	-4.6425	-4.6425	FALSE	FALSE	FALSE	FALSE	FALSE	FALSE	FALSE	FALSE	FALSE	FALSE
ERN1	NP_001424.3	0	0	1	1	-3.0645	-5.1895	FALSE	FALSE	FALSE	FALSE	FALSE	FALSE	FALSE	FALSE	FALSE	FALSE
ERVH48-1	NP_001295420.1	0	0	4	6		-5.1815	FALSE	FALSE	FALSE	FALSE	FALSE	FALSE	FALSE	FALSE	FALSE	FALSE
ESCO2	NP_001017420.1	0	0	0	2	-5.1245	-4.6765	FALSE	TRUE	TRUE	FALSE	FALSE	FALSE	TRUE	FALSE	FALSE	TRUE
ESPL1	NP_036423.4	0	0	0	3	-3.829	-5.003	FALSE	FALSE	FALSE	FALSE	FALSE	FALSE	FALSE	FALSE	FALSE	FALSE
ESYT3	NP_001309760.1	0	0	0	2	-4.163	-4.6275	FALSE	FALSE	FALSE	FALSE	FALSE	FALSE	FALSE	FALSE	FALSE	FALSE
EXOC1	NP_001020095.1	0	0	0	1	-2.8685	-4.862	FALSE	FALSE	FALSE	FALSE	FALSE	FALSE	FALSE	FALSE	FALSE	FALSE
EXOC6B	NP_056004.1	0	0	0	2	-6.956	-5.008	FALSE	TRUE	TRUE	FALSE	FALSE	FALSE	FALSE	FALSE	FALSE	TRUE
EXOSC10	NP_001001998.1	0	0	1	0	-3.145	-5.4085	FALSE	FALSE	FALSE	FALSE	FALSE	FALSE	FALSE	FALSE	FALSE	FALSE
EXOSC9	NP_001029366.1	0	0	0	1		-4.688	FALSE	FALSE	FALSE	FALSE	FALSE	FALSE	TRUE	FALSE	FALSE	TRUE
EXT1	NP_000118.2	0	0	0	2	-4.3885	-4.823	FALSE	FALSE	FALSE	FALSE	FALSE	FALSE	TRUE	FALSE	FALSE	TRUE
EYA3	NP_001981.2	0	0	0	1	-4.4325	-4.6375	FALSE	FALSE	FALSE	FALSE	FALSE	FALSE	FALSE	FALSE	FALSE	FALSE
EZR	NP_003370.2	0	0	0	1	-3.946	-4.785	FALSE	FALSE	FALSE	FALSE	FALSE	FALSE	FALSE	FALSE	FALSE	FALSE
F5	NP_000121.2	0	0	0	1	-3.977	-4.682	FALSE	FALSE	FALSE	FALSE	FALSE	FALSE	FALSE	FALSE	FALSE	FALSE
F9	NP_000124.1	0	0	3	4	-4.366	-5.9275	FALSE	FALSE	FALSE	FALSE	FALSE	FALSE	FALSE	FALSE	FALSE	FALSE
FAM120A	NP_055427.2	0	0	0	1	-4.0425	-4.968	FALSE	FALSE	FALSE	FALSE	FALSE	FALSE	FALSE	FALSE	FALSE	FALSE
FAM120C	NP_060318.4	0	0	1	1	-3.318	-6.092	FALSE	FALSE	FALSE	FALSE	FALSE	FALSE	FALSE	FALSE	FALSE	FALSE
FAM169A	NP_056381.1	0	0	0	1	-3.2555	-4.6945	FALSE	FALSE	FALSE	FALSE	FALSE	FALSE	FALSE	FALSE	FALSE	FALSE
FAM50A	NP_004690.1	0	0	1	3	-4.5705	-5.291	FALSE	FALSE	FALSE	FALSE	FALSE	FALSE	FALSE	FALSE	FALSE	FALSE
FAXC	NP_115900.1	0	0	0	1	-3.456	-4.6255	FALSE	FALSE	FALSE	FALSE	FALSE	FALSE	FALSE	FALSE	FALSE	FALSE
FBL	NP_001427.2	0	0	0	2	-3.441	-4.7145	FALSE	FALSE	FALSE	FALSE	FALSE	FALSE	FALSE	FALSE	FALSE	FALSE
FBXL16	NP_699181.2	0	0	0	1		-4.6935	FALSE	FALSE	FALSE	FALSE	FALSE	FALSE	FALSE	FALSE	FALSE	FALSE
FBXL17	NP_001156787.2	0	0	0	1		-4.656	FALSE	FALSE	FALSE	FALSE	FALSE	FALSE	FALSE	FALSE	FALSE	FALSE
FBXO15	NP_001136430.1	0	0	0	1	-3.483	-4.6315	FALSE	FALSE	FALSE	FALSE	FALSE	FALSE	FALSE	FALSE	FALSE	FALSE
FCER1G	NP_004097.1	0	0	0	1		-4.8345	FALSE	FALSE	FALSE	FALSE	FALSE	FALSE	FALSE	FALSE	FALSE	FALSE
FCHSD2	NP_055639.2	0	0	0	1	-4.2725	-4.721	FALSE	FALSE	FALSE	FALSE	FALSE	FALSE	FALSE	FALSE	FALSE	FALSE
FGD1	NP_004454.2	0	0	2	3	-5.15	-5.0805	FALSE	TRUE	TRUE	FALSE	FALSE	FALSE	TRUE	FALSE	FALSE	TRUE
FGD2	NP_775829.2	0	0	0	1	-3.405	-4.797	FALSE	FALSE	FALSE	FALSE	FALSE	FALSE	FALSE	FALSE	FALSE	FALSE
FGD4	NP_640334.2	0	0	0	1	-3.157	-4.647	FALSE	FALSE	FALSE	FALSE	FALSE	FALSE	FALSE	FALSE	FALSE	FALSE
FGF10	NP_004456.1	0	0	0	1		-4.896	FALSE	FALSE	FALSE	FALSE	FALSE	FALSE	TRUE	FALSE	FALSE	TRUE
FGF14	NP_004106.1	0	0	1	0	-3.131	-5.54	FALSE	FALSE	FALSE	FALSE	FALSE	FALSE	TRUE	FALSE	FALSE	TRUE
FGFR3	NP_001156685.1	0	0	1	1	-3.8235	-5.093	TRUE	FALSE	TRUE	FALSE	FALSE	FALSE	TRUE	TRUE	TRUE	TRUE
FLOT1	NP_005794.1	0	0	0	1	-3.7005	-4.9185	FALSE	FALSE	FALSE	FALSE	FALSE	FALSE	FALSE	FALSE	FALSE	FALSE
FLT1	NP_002010.2	0	0	0	1	-4.5095	-4.7185	FALSE	FALSE	FALSE	FALSE	FALSE	FALSE	FALSE	FALSE	FALSE	FALSE
FLVCR1	NP_054772.1	0	0	0	1		-4.945	FALSE	FALSE	FALSE	FALSE	FALSE	FALSE	TRUE	FALSE	FALSE	TRUE
FMNL1	NP_005883.3	0	0	0	1	-3.7655	-4.623	FALSE	FALSE	FALSE	FALSE	FALSE	FALSE	FALSE	FALSE	FALSE	FALSE
FMNL2	NP_443137.2	0	0	1	3	-3.778	-5.09	FALSE	FALSE	FALSE	FALSE	FALSE	FALSE	FALSE	FALSE	FALSE	FALSE
FMNL3	NP_944489.2	0	0	1	4	-3.441	-5.368	FALSE	FALSE	FALSE	FALSE	FALSE	FALSE	FALSE	FALSE	FALSE	FALSE
FNDC3A	NP_001073141.1	0	0	1	0	-4.3775	-5.198	FALSE	FALSE	FALSE	FALSE	FALSE	FALSE	FALSE	FALSE	FALSE	FALSE
FNDC3B	NP_001128567.1	0	0	0	4	-4.4555	-4.835	FALSE	FALSE	FALSE	FALSE	FALSE	FALSE	FALSE	FALSE	FALSE	FALSE
FOSL2	NP_005244.1	0	0	0	1	-3.495	-4.789	FALSE	FALSE	FALSE	FALSE	FALSE	FALSE	FALSE	FALSE	FALSE	FALSE
FOXD2	NP_004465.3	0	0	0	1		-4.8225	FALSE	FALSE	FALSE	FALSE	FALSE	FALSE	FALSE	FALSE	FALSE	FALSE
FOXK1	NP_001032242.1	0	0	0	1	-4.226	-4.635	FALSE	FALSE	FALSE	FALSE	FALSE	FALSE	FALSE	FALSE	FALSE	FALSE
FOXO1	NP_002006.2	0	0	0	1	-4.255	-4.6305	FALSE	FALSE	FALSE	FALSE	FALSE	FALSE	FALSE	FALSE	FALSE	FALSE
FPR2	NP_001005738.1	0	0	0	1	-3.252	-4.747	FALSE	FALSE	FALSE	FALSE	FALSE	FALSE	FALSE	FALSE	FALSE	FALSE
FRMD4A	NP_060497.3	0	0	0	2	-4.2985	-4.9155	FALSE	FALSE	FALSE	FALSE	FALSE	FALSE	FALSE	FALSE	FALSE	FALSE
FSTL4	NP_055897.1	0	0	0	1	-2.9995	-4.634	FALSE	FALSE	FALSE	FALSE	FALSE	FALSE	FALSE	FALSE	FALSE	FALSE
FSTL5	NP_064501.2	0	0	0	1	-3.1695	-4.6465	FALSE	FALSE	FALSE	FALSE	FALSE	FALSE	FALSE	FALSE	FALSE	FALSE
FTL	NP_000137.2	0	0	1	0		-5.2195	FALSE	FALSE	FALSE	FALSE	FALSE	FALSE	TRUE	FALSE	FALSE	TRUE
FUNDC2	NP_076423.2	0	0	0	2		-4.869	FALSE	FALSE	FALSE	FALSE	FALSE	FALSE	FALSE	FALSE	FALSE	FALSE
FZD3	NP_059108.1	0	0	0	1		-4.829	FALSE	FALSE	FALSE	FALSE	FALSE	FALSE	FALSE	FALSE	FALSE	FALSE
FZD5	NP_003459.2	0	0	0	1		-4.944	FALSE	FALSE	FALSE	FALSE	FALSE	FALSE	TRUE	FALSE	FALSE	TRUE
FZD8	NP_114072.1	0	0	1	0	-2.9615	-5.2125	FALSE	FALSE	FALSE	FALSE	FALSE	FALSE	FALSE	FALSE	FALSE	FALSE
G6PD	NP_000393.4	0	0	1	0	-3.7945	-5.123	FALSE	FALSE	FALSE	FALSE	FALSE	FALSE	FALSE	FALSE	FALSE	FALSE
GAB4	NP_001032903.1	0	0	0	6	-2.432	-4.976	FALSE	FALSE	FALSE	FALSE	FALSE	FALSE	FALSE	FALSE	FALSE	FALSE
GABRA2	NP_001317619.1	0	0	0	1		-4.848	FALSE	FALSE	FALSE	FALSE	FALSE	FALSE	FALSE	FALSE	FALSE	FALSE
GABRA5	NP_000801.1	0	0	0	2	-4.5805	-4.961	TRUE	FALSE	TRUE	FALSE	FALSE	FALSE	FALSE	FALSE	FALSE	TRUE
GABRD	NP_000806.2	0	0	0	1	-4.7245	-4.638	FALSE	FALSE	FALSE	FALSE	FALSE	FALSE	FALSE	FALSE	FALSE	FALSE
GABRG3	NP_150092.2	0	0	0	1	-3.7575	-4.621	FALSE	FALSE	FALSE	FALSE	FALSE	FALSE	FALSE	FALSE	FALSE	FALSE
GADD45A	NP_001915.1	0	0	0	1	-3.3565	-4.66	FALSE	FALSE	FALSE	FALSE	FALSE	FALSE	FALSE	FALSE	FALSE	FALSE
GAL3ST1	NP_001305037.1	0	0	0	1	-3.9815	-4.705	FALSE	FALSE	FALSE	FALSE	FALSE	FALSE	FALSE	FALSE	FALSE	FALSE
GALNT1	NP_065207.2	0	0	0	1	-4.0965	-4.698	FALSE	FALSE	FALSE	FALSE	FALSE	FALSE	FALSE	FALSE	FALSE	FALSE
GALNT17	NP_071924.1	0	0	0	1	-3.838	-4.6665	FALSE	FALSE	FALSE	FALSE	FALSE	FALSE	FALSE	FALSE	FALSE	FALSE
GBP5	NP_001127958.1	0	0	0	2	-3.5435	-4.6865	FALSE	FALSE	FALSE	FALSE	FALSE	FALSE	FALSE	FALSE	FALSE	FALSE
GCK	NP_000153.1	0	0	1	1	-3.096	-5.0965	FALSE	FALSE	FALSE	FALSE	FALSE	FALSE	FALSE	FALSE	FALSE	TRUE
GCNA	NP_443189.1	0	0	0	2		-4.797	FALSE	FALSE	FALSE	FALSE	FALSE	FALSE	FALSE	FALSE	FALSE	FALSE
GDF11	NP_005802.1	0	0	0	1	-3.991	-4.9595	FALSE	FALSE	FALSE	FALSE	FALSE	FALSE	TRUE	FALSE	FALSE	TRUE
GET3	NP_004308.2	0	0	1	0		-5.1085	FALSE	FALSE	FALSE	FALSE	FALSE	FALSE	FALSE	FALSE	FALSE	FALSE
GFAP	NP_002046.1	0	0	0	1	-4.416	-4.629	TRUE	FALSE	TRUE	FALSE	FALSE	FALSE	TRUE	FALSE	FALSE	TRUE
GFM2	NP_115756.2	0	0	0	1	-3.616	-4.7505	FALSE	FALSE	FALSE	FALSE	FALSE	FALSE	FALSE	FALSE	FALSE	FALSE
GFPT1	NP_002047.2	0	0	0	2	-4.017	-5.033	FALSE	FALSE	FALSE	FALSE	FALSE	FALSE	FALSE	FALSE	FALSE	FALSE
GJA4	NP_002051.2	0	0	0	1	-4.2825	-4.7165	FALSE	FALSE	FALSE	FALSE	FALSE	FALSE	FALSE	FALSE	FALSE	FALSE
GJB1	NP_000157.1	0	0	1	0		-5.2725	FALSE	FALSE	FALSE	FALSE	FALSE	FALSE	FALSE	FALSE	FALSE	FALSE
GJC1	NP_001073852.1	0	0	1	0		-5.5445	FALSE	FALSE	FALSE	FALSE	FALSE	FALSE	FALSE	FALSE	FALSE	FALSE
GK2	NP_149991.2	0	0	0	18		-4.6275	FALSE	FALSE	FALSE	FALSE	FALSE	FALSE	FALSE	FALSE	FALSE	FALSE
GLB1L2	NP_612351.2	0	0	0	2	-3.072	-4.642	FALSE	FALSE	FALSE	FALSE	FALSE	FALSE	FALSE	FALSE	FALSE	FALSE
GLS2	NP_037399.2	0	0	1	0	-4.093	-5.216	FALSE	FALSE	FALSE	FALSE	FALSE	FALSE	FALSE	FALSE	FALSE	FALSE
GMEB1	NP_006573.2	0	0	0	1	-3.3245	-4.8115	FALSE	FALSE	FALSE	FALSE	FALSE	FALSE	FALSE	FALSE	FALSE	FALSE
GNA11	NP_002058.2	0	0	0	1	-4.5295	-4.7455	FALSE	FALSE	FALSE	FALSE	FALSE	FALSE	TRUE	FALSE	FALSE	TRUE
GNA12	NP_031379.2	0	0	1	0	-3.761	-5.0745	FALSE	FALSE	FALSE	FALSE	FALSE	FALSE	FALSE	FALSE	FALSE	FALSE
GNA13	NP_006563.2	0	0	0	1	-3.1375	-4.633	FALSE	FALSE	FALSE	FALSE	FALSE	FALSE	FALSE	FALSE	FALSE	FALSE
GNAL	NP_001135811.1	0	0	1	1	-5.08	-6.8285	FALSE	TRUE	TRUE	FALSE	FALSE	FALSE	FALSE	FALSE	FALSE	FALSE
GNAQ	NP_002063.2	0	0	0	1		-4.965	FALSE	FALSE	FALSE	FALSE	FALSE	FALSE	TRUE	FALSE	FALSE	TRUE
GPC4	NP_001439.2	0	0	0	1		-4.8415	FALSE	FALSE	FALSE	FALSE	FALSE	FALSE	TRUE	FALSE	FALSE	TRUE
GPM6A	NP_005268.1	0	0	0	1	-3.6985	-4.7405	FALSE	FALSE	FALSE	FALSE	FALSE	FALSE	FALSE	FALSE	FALSE	FALSE
GPR137C	NP_001093122.1	0	0	0	1	-2.8815	-4.8205	FALSE	FALSE	FALSE	FALSE	FALSE	FALSE	FALSE	FALSE	FALSE	FALSE
GPR155	NP_001028217.1	0	0	0	1	-4.391	-4.657	FALSE	FALSE	FALSE	FALSE	FALSE	FALSE	FALSE	FALSE	FALSE	FALSE
GPR174	NP_115942.1	0	0	0	1	-3.952	-4.6585	FALSE	FALSE	FALSE	FALSE	FALSE	FALSE	FALSE	FALSE	FALSE	FALSE
GPR22	NP_005286.2	0	0	0	1	-2.9085	-4.65	FALSE	FALSE	FALSE	FALSE	FALSE	FALSE	FALSE	FALSE	FALSE	FALSE
GPR3	NP_005272.1	0	0	0	11		-4.6815	FALSE	FALSE	FALSE	FALSE	FALSE	FALSE	FALSE	FALSE	FALSE	FALSE
GPRASP1	NP_001092880.1	0	0	0	1	-3.9705	-4.627	FALSE	FALSE	FALSE	FALSE	FALSE	FALSE	FALSE	FALSE	FALSE	FALSE
GRB14	NP_004481.2	0	0	0	1		-4.736	FALSE	FALSE	FALSE	FALSE	FALSE	FALSE	FALSE	FALSE	FALSE	FALSE
GRIA1	NP_001107655.1	0	0	0	2	-4.451	-4.9015	FALSE	FALSE	FALSE	FALSE	FALSE	FALSE	TRUE	FALSE	FALSE	TRUE
GRIN2D	NP_000827.2	0	0	0	1	-4.8205	-4.739	FALSE	FALSE	FALSE	FALSE	FALSE	FALSE	TRUE	FALSE	FALSE	TRUE
GRINA	NP_001009184.1	0	0	0	1	-2.559	-4.8715	FALSE	FALSE	FALSE	FALSE	FALSE	FALSE	FALSE	FALSE	FALSE	FALSE
GRIP1	NP_066973.2	0	0	0	1	-3.389	-5.0255	FALSE	FALSE	FALSE	FALSE	FALSE	FALSE	FALSE	FALSE	FALSE	FALSE
GSTM5	NP_000842.2	0	0	0	1		-4.859	FALSE	FALSE	FALSE	FALSE	FALSE	FALSE	FALSE	FALSE	FALSE	FALSE
GTF2IRD1	NP_001186136.1	0	0	1	0	-3.919	-5.494	FALSE	FALSE	FALSE	FALSE	FALSE	FALSE	FALSE	FALSE	FALSE	FALSE
GUCY1A2	NP_001243353.1	0	0	0	1	-3.1355	-4.992	FALSE	FALSE	FALSE	FALSE	FALSE	FALSE	FALSE	FALSE	FALSE	FALSE
H2BC1	NP_733759.1	0	0	0	3		-4.8735	FALSE	FALSE	FALSE	FALSE	FALSE	FALSE	FALSE	FALSE	FALSE	FALSE
H3-3B	NP_005315.1	0	0	0	1		-4.82	FALSE	FALSE	FALSE	FALSE	FALSE	FALSE	TRUE	FALSE	FALSE	TRUE
HAPSTR1	NP_054836.2	0	0	1	0	-3.5585	-5.324	FALSE	FALSE	FALSE	FALSE	FALSE	FALSE	FALSE	FALSE	FALSE	FALSE
HBA1	NP_000549.1	0	0	0	1		-5.005	FALSE	FALSE	FALSE	FALSE	FALSE	FALSE	FALSE	FALSE	FALSE	FALSE
HCFC1	NP_005325.2	0	0	2	0	-3.407	-5.7265	FALSE	FALSE	FALSE	FALSE	FALSE	FALSE	TRUE	FALSE	FALSE	TRUE
HCFC2	NP_037452.1	0	0	1	0		-5.2975	FALSE	FALSE	FALSE	FALSE	FALSE	FALSE	FALSE	FALSE	FALSE	FALSE
HCN1	NP_066550.2	0	0	0	1	-4.871	-4.6205	FALSE	FALSE	FALSE	FALSE	FALSE	FALSE	TRUE	FALSE	FALSE	TRUE
HCN2	NP_001185.3	0	0	0	1	-3.151	-4.6555	FALSE	FALSE	FALSE	FALSE	FALSE	TRUE	FALSE	FALSE	FALSE	TRUE
HDAC1	NP_004955.2	0	0	0	1		-4.907	FALSE	FALSE	FALSE	FALSE	FALSE	FALSE	FALSE	FALSE	FALSE	FALSE
HDAC6	NP_006035.2	0	0	1	2	-3.916	-5.2775	FALSE	FALSE	FALSE	FALSE	FALSE	FALSE	FALSE	FALSE	FALSE	TRUE
HDAC7	NP_001354975.1	0	0	1	0	-5.1085	-5.106	FALSE	FALSE	FALSE	FALSE	FALSE	FALSE	FALSE	FALSE	FALSE	FALSE
HDAC9	NP_478056.1	0	0	0	1	-3.433	-4.661	FALSE	FALSE	FALSE	FALSE	FALSE	FALSE	FALSE	FALSE	FALSE	FALSE
HDLBP	NP_005327.1	0	0	1	0	-3.8735	-5.095	FALSE	FALSE	FALSE	FALSE	FALSE	FALSE	FALSE	FALSE	FALSE	FALSE
HEATR1	NP_060542.4	0	0	0	2	-4.418	-4.6245	FALSE	FALSE	FALSE	FALSE	FALSE	FALSE	FALSE	FALSE	FALSE	FALSE
HERC3	NP_055421.1	0	0	0	3	-4.661	-4.784	FALSE	FALSE	FALSE	FALSE	FALSE	FALSE	FALSE	FALSE	FALSE	FALSE
HEXIM1	NP_006451.1	0	0	0	1		-4.9245	FALSE	FALSE	FALSE	FALSE	FALSE	FALSE	FALSE	FALSE	FALSE	FALSE
HIPK3	NP_005725.3	0	0	0	1	-3.568	-4.656	FALSE	FALSE	FALSE	FALSE	FALSE	FALSE	FALSE	FALSE	FALSE	FALSE
HLA-DRA	NP_061984.2	0	0	0	2		-4.907	FALSE	FALSE	FALSE	FALSE	FALSE	FALSE	FALSE	FALSE	FALSE	FALSE
HLA-G	NP_002118.1	0	0	0	1		-4.804	FALSE	FALSE	FALSE	FALSE	FALSE	FALSE	FALSE	FALSE	FALSE	FALSE
HMGCR	NP_000850.1	0	0	0	1	-3.977	-4.9665	FALSE	FALSE	FALSE	FALSE	FALSE	FALSE	FALSE	FALSE	FALSE	FALSE
HMGCS1	NP_001311148.1	0	0	0	1		-4.8845	FALSE	FALSE	FALSE	FALSE	FALSE	FALSE	FALSE	FALSE	FALSE	FALSE
HNRNPA1	NP_112420.1	0	0	1	1	-3.789	-5.8995	FALSE	FALSE	FALSE	FALSE	FALSE	FALSE	FALSE	FALSE	FALSE	FALSE
HNRNPDL	NP_112740.1	0	0	0	1	-4.554	-4.834	FALSE	FALSE	FALSE	FALSE	FALSE	TRUE	FALSE	FALSE	FALSE	FALSE
HNRNPH1	NP_001244222.1	0	0	0	1	-5.0125	-5.048	FALSE	FALSE	FALSE	FALSE	FALSE	FALSE	TRUE	FALSE	FALSE	TRUE
HNRNPU	NP_114032.2	0	0	0	3	-5.0075	-4.6705	FALSE	FALSE	FALSE	FALSE	FALSE	FALSE	TRUE	TRUE	FALSE	TRUE
HOMER1	NP_004263.1	0	0	0	1	-4.3785	-4.7725	FALSE	FALSE	FALSE	FALSE	FALSE	FALSE	FALSE	FALSE	FALSE	FALSE
HOOK3	NP_115786.1	0	0	0	1	-4.138	-4.839	FALSE	FALSE	FALSE	FALSE	FALSE	FALSE	FALSE	FALSE	FALSE	FALSE
HRH2	NP_001124527.1	0	0	0	1	-4.0655	-4.8975	FALSE	FALSE	FALSE	FALSE	FALSE	FALSE	FALSE	FALSE	FALSE	FALSE
HSD17B7	NP_001291441.1	0	0	0	1		-4.631	FALSE	FALSE	FALSE	FALSE	FALSE	FALSE	FALSE	FALSE	FALSE	FALSE
HSP90AA1	NP_001017963.2	0	0	1	1	-4.1495	-5.392	FALSE	FALSE	FALSE	FALSE	FALSE	TRUE	FALSE	FALSE	FALSE	FALSE
HSP90AB1	NP_031381.2	0	0	0	1	-3.5685	-5.0005	FALSE	FALSE	FALSE	FALSE	FALSE	TRUE	FALSE	FALSE	FALSE	FALSE
HSPA1L	NP_005518.3	0	0	0	1	-2.8455	-4.8085	FALSE	FALSE	FALSE	FALSE	FALSE	FALSE	FALSE	FALSE	FALSE	FALSE
HSPA8	NP_006588.1	0	0	0	1		-4.637	FALSE	FALSE	FALSE	FALSE	FALSE	FALSE	FALSE	FALSE	FALSE	FALSE
HSPD1	NP_002147.2	0	0	0	1	-3.332	-4.928	FALSE	FALSE	FALSE	FALSE	FALSE	FALSE	TRUE	FALSE	FALSE	TRUE
HTR4	NP_001035263.1	0	0	0	1		-4.762	FALSE	FALSE	FALSE	FALSE	FALSE	FALSE	FALSE	FALSE	FALSE	FALSE
HYOU1	NP_006380.1	0	0	0	1	-3.2355	-4.731	FALSE	FALSE	FALSE	FALSE	FALSE	FALSE	FALSE	FALSE	FALSE	FALSE
IARS2	NP_060530.3	0	0	0	1	-4.3085	-4.6805	FALSE	FALSE	FALSE	FALSE	FALSE	FALSE	TRUE	FALSE	FALSE	TRUE
IBTK	NP_056340.2	0	0	0	1	-3.532	-4.657	FALSE	FALSE	FALSE	FALSE	FALSE	FALSE	FALSE	FALSE	FALSE	FALSE
ICAM2	NP_000864.2	0	0	0	1	-3.07	-4.624	FALSE	FALSE	FALSE	FALSE	FALSE	FALSE	FALSE	FALSE	FALSE	FALSE
ICAM5	NP_003250.3	0	0	0	1		-4.815	FALSE	FALSE	FALSE	FALSE	FALSE	FALSE	FALSE	FALSE	FALSE	FALSE
ICE1	NP_056140.1	0	0	0	1	-3.024	-4.977	FALSE	FALSE	FALSE	FALSE	FALSE	FALSE	FALSE	FALSE	FALSE	FALSE
IFFO1	NP_001180386.1	0	0	0	1	-3.113	-4.662	FALSE	FALSE	FALSE	FALSE	FALSE	FALSE	FALSE	FALSE	FALSE	FALSE
IFNA16	NP_002164.1	0	0	0	3		-4.921	FALSE	FALSE	FALSE	FALSE	FALSE	FALSE	FALSE	FALSE	FALSE	FALSE
IGDCC3	NP_004875.2	0	0	0	1	-2.682	-4.663	FALSE	FALSE	FALSE	FALSE	FALSE	FALSE	FALSE	FALSE	FALSE	FALSE
IGF1R	NP_000866.1	0	0	0	5	-4.7235	-4.811	FALSE	FALSE	FALSE	FALSE	FALSE	FALSE	TRUE	FALSE	FALSE	TRUE
IGF2BP1	NP_006537.3	0	0	0	1	-4.4035	-4.7485	FALSE	FALSE	FALSE	FALSE	FALSE	FALSE	FALSE	FALSE	FALSE	FALSE
IGF2BP2	NP_001278801.1	0	0	0	1	-3.358	-5.001	FALSE	FALSE	FALSE	FALSE	FALSE	FALSE	FALSE	FALSE	FALSE	FALSE
IHO1	NP_001128669.1	0	0	0	1		-4.6715	FALSE	FALSE	FALSE	FALSE	FALSE	FALSE	FALSE	FALSE	FALSE	FALSE
IKBKE	NP_054721.1	0	0	0	1	-3.4805	-4.666	FALSE	FALSE	FALSE	FALSE	FALSE	FALSE	FALSE	FALSE	FALSE	FALSE
IKZF5	NP_001258769.1	0	0	0	1		-4.6885	FALSE	FALSE	FALSE	FALSE	FALSE	FALSE	FALSE	FALSE	FALSE	FALSE
IL1R1	NP_000868.1	0	0	0	1		-4.7305	FALSE	FALSE	FALSE	FALSE	FALSE	FALSE	FALSE	FALSE	FALSE	FALSE
IL1RAPL1	NP_055086.1	0	0	0	1	-4.0775	-4.9385	FALSE	FALSE	FALSE	FALSE	FALSE	FALSE	TRUE	FALSE	FALSE	TRUE
IL21R	NP_068570.1	0	0	0	1	-3.7205	-4.645	FALSE	FALSE	FALSE	FALSE	FALSE	FALSE	FALSE	FALSE	FALSE	FALSE
ING3	NP_061944.2	0	0	0	1	-4.4045	-4.75	FALSE	FALSE	FALSE	FALSE	FALSE	FALSE	FALSE	FALSE	FALSE	FALSE
INHBE	NP_113667.1	0	0	1	0	-2.848	-5.5715	FALSE	FALSE	FALSE	FALSE	FALSE	FALSE	FALSE	FALSE	FALSE	FALSE
INO80	NP_060023.1	0	0	3	0	-4.289	-5.2255	FALSE	FALSE	FALSE	FALSE	FALSE	FALSE	FALSE	FALSE	FALSE	FALSE
INPP4B	NP_001317969.1	0	0	0	1	-4.013	-4.6355	FALSE	FALSE	FALSE	FALSE	FALSE	FALSE	FALSE	FALSE	FALSE	FALSE
INSR	NP_000199.2	0	0	0	1	-3.352	-4.728	FALSE	FALSE	FALSE	FALSE	FALSE	FALSE	FALSE	FALSE	FALSE	TRUE
INTS3	NP_001311404.1	0	0	0	1	-3.8965	-5.0475	FALSE	FALSE	FALSE	FALSE	FALSE	FALSE	FALSE	FALSE	FALSE	FALSE
INTS6	NP_036273.1	0	0	5	2	-4.453	-5.307	FALSE	FALSE	FALSE	FALSE	FALSE	FALSE	FALSE	FALSE	FALSE	FALSE
INTS6L	NP_872346.3	0	0	0	2	-4.4455	-4.91	FALSE	FALSE	FALSE	FALSE	FALSE	FALSE	FALSE	FALSE	FALSE	FALSE
IP6K2	NP_001005909.1	0	0	0	1		-4.635	FALSE	FALSE	FALSE	FALSE	FALSE	FALSE	FALSE	FALSE	FALSE	FALSE
IPO5	NP_002262.4	0	0	0	1	-2.808	-4.909	FALSE	FALSE	FALSE	FALSE	FALSE	FALSE	FALSE	FALSE	FALSE	FALSE
IPO9	NP_060555.2	0	0	0	2	-3.671	-4.7415	FALSE	FALSE	FALSE	FALSE	FALSE	FALSE	FALSE	FALSE	FALSE	FALSE
IQSEC3	NP_001164209.1	0	0	0	1	-3.099	-4.6765	FALSE	FALSE	FALSE	FALSE	FALSE	FALSE	FALSE	FALSE	FALSE	FALSE
IRF2	NP_002190.2	0	0	0	1	-4.7815	-4.823	FALSE	FALSE	FALSE	FALSE	FALSE	FALSE	FALSE	FALSE	FALSE	FALSE
IRF4	NP_002451.2	0	0	1	0	-4.6975	-5.5485	FALSE	FALSE	FALSE	FALSE	FALSE	FALSE	FALSE	FALSE	FALSE	FALSE
ISL1	NP_002193.2	0	0	0	1	-2.3525	-4.802	FALSE	FALSE	FALSE	FALSE	FALSE	FALSE	FALSE	FALSE	FALSE	FALSE
ITCH	NP_113671.3	0	0	0	1	-4.9325	-4.6275	FALSE	FALSE	FALSE	FALSE	FALSE	FALSE	TRUE	FALSE	FALSE	TRUE
ITFG2	NP_060933.3	0	0	0	1	-2.685	-4.6885	FALSE	FALSE	FALSE	FALSE	FALSE	FALSE	FALSE	FALSE	FALSE	FALSE
ITGAV	NP_001138472.2	0	0	0	1		-4.617	FALSE	FALSE	FALSE	FALSE	FALSE	FALSE	FALSE	FALSE	FALSE	FALSE
ITK	NP_005537.3	0	0	0	1	-4.5635	-4.7655	FALSE	FALSE	FALSE	FALSE	FALSE	FALSE	FALSE	FALSE	FALSE	FALSE
ITPKA	NP_002211.1	0	0	0	1	-4.5945	-4.717	FALSE	FALSE	FALSE	FALSE	FALSE	FALSE	FALSE	FALSE	FALSE	FALSE
JADE3	NP_001070913.1	0	0	2	0		-5.209	FALSE	FALSE	FALSE	FALSE	FALSE	FALSE	FALSE	FALSE	FALSE	FALSE
JAG1	NP_000205.1	0	0	0	1	-4.312	-4.6615	FALSE	FALSE	FALSE	FALSE	FALSE	FALSE	TRUE	FALSE	FALSE	TRUE
JAG2	NP_002217.3	0	0	0	1	-3.557	-4.8285	FALSE	FALSE	FALSE	FALSE	FALSE	FALSE	TRUE	FALSE	FALSE	TRUE
KANSL3	NP_001108488.1	0	0	0	1	-4.1295	-4.817	FALSE	FALSE	FALSE	FALSE	FALSE	FALSE	FALSE	FALSE	FALSE	FALSE
KAT7	NP_001186086.1	0	0	1	0		-5.3575	FALSE	FALSE	FALSE	FALSE	FALSE	FALSE	FALSE	FALSE	FALSE	FALSE
KBTBD2	NP_056298.2	0	0	0	1	-4.7635	-4.7765	FALSE	FALSE	FALSE	FALSE	FALSE	FALSE	FALSE	FALSE	FALSE	FALSE
KBTBD6	NP_690867.3	0	0	0	1	-4.1935	-4.6545	FALSE	FALSE	FALSE	FALSE	FALSE	FALSE	FALSE	FALSE	FALSE	FALSE
KCNA2	NP_004965.1	0	0	1	0	-5.369	-5.228	TRUE	TRUE	TRUE	FALSE	FALSE	FALSE	TRUE	TRUE	TRUE	TRUE
KCNA3	NP_002223.3	0	0	0	1	-4.879	-4.935	FALSE	FALSE	FALSE	FALSE	FALSE	FALSE	FALSE	FALSE	FALSE	FALSE
KCNA6	NP_002226.1	0	0	0	1	-4.9705	-4.757	FALSE	FALSE	FALSE	FALSE	FALSE	FALSE	FALSE	FALSE	FALSE	FALSE
KCNAB2	NP_003627.1	0	0	0	2	-4.393	-4.7035	FALSE	FALSE	FALSE	FALSE	FALSE	FALSE	FALSE	FALSE	FALSE	FALSE
KCND1	NP_004970.3	0	0	0	2	-3.804	-4.738	FALSE	FALSE	FALSE	FALSE	FALSE	FALSE	FALSE	FALSE	FALSE	FALSE
KCND2	NP_036413.1	0	0	3	0	-5.3345	-5.8035	FALSE	TRUE	TRUE	FALSE	FALSE	FALSE	FALSE	FALSE	FALSE	FALSE
KCNH3	NP_036416.1	0	0	0	1	-4.078	-4.7105	FALSE	FALSE	FALSE	FALSE	FALSE	FALSE	FALSE	FALSE	FALSE	FALSE
KCNH5	NP_647479.2	0	0	0	1	-4.436	-4.9735	FALSE	FALSE	FALSE	FALSE	FALSE	FALSE	TRUE	FALSE	FALSE	TRUE
KCNH7	NP_150375.2	0	0	1	0	-4.4515	-5.7195	FALSE	FALSE	FALSE	FALSE	FALSE	FALSE	FALSE	FALSE	FALSE	FALSE
KCNH8	NP_653234.2	0	0	0	1	-3.5805	-4.878	FALSE	FALSE	FALSE	FALSE	FALSE	FALSE	FALSE	FALSE	FALSE	FALSE
KCNIP4	NP_079497.2	0	0	1	0		-5.1045	FALSE	FALSE	FALSE	FALSE	FALSE	FALSE	FALSE	FALSE	FALSE	FALSE
KCNJ12	NP_066292.2	0	0	34	29	-4.222	-5.7875	FALSE	FALSE	FALSE	FALSE	FALSE	FALSE	FALSE	FALSE	FALSE	FALSE
KCNJ15	NP_733932.1	0	0	0	2		-4.623	FALSE	FALSE	FALSE	FALSE	FALSE	FALSE	FALSE	FALSE	FALSE	FALSE
KCNJ3	NP_002230.1	0	0	0	3	-4.2345	-5.023	FALSE	FALSE	FALSE	FALSE	FALSE	FALSE	FALSE	FALSE	FALSE	FALSE
KCNJ6	NP_002231.1	0	0	3	0	-4.276	-5.2975	FALSE	FALSE	FALSE	FALSE	FALSE	FALSE	TRUE	FALSE	FALSE	TRUE
KCNJ8	NP_004973.1	0	0	1	1		-5.1715	FALSE	FALSE	FALSE	FALSE	FALSE	FALSE	TRUE	FALSE	FALSE	TRUE
KCNK9	NP_001269463.1	0	0	1	0	-5.5415	-5.1205	FALSE	TRUE	TRUE	FALSE	FALSE	FALSE	TRUE	FALSE	FALSE	TRUE
KCNN1	NP_002239.2	0	0	0	1	-3.7275	-4.8285	FALSE	FALSE	FALSE	FALSE	FALSE	FALSE	FALSE	FALSE	FALSE	FALSE
KCNN3	NP_002240.3	0	0	0	1	-4.2675	-4.674	FALSE	FALSE	FALSE	FALSE	FALSE	FALSE	TRUE	FALSE	FALSE	TRUE
KCNT2	NP_940905.2	0	0	0	2	-4.449	-4.716	TRUE	FALSE	TRUE	FALSE	FALSE	FALSE	TRUE	FALSE	FALSE	TRUE
KDM1A	NP_001009999.1	0	0	0	3	-4.747	-4.696	TRUE	FALSE	TRUE	FALSE	FALSE	FALSE	TRUE	FALSE	FALSE	TRUE
KDM2A	NP_036440.1	0	0	1	0	-5.3275	-5.1305	FALSE	TRUE	TRUE	FALSE	FALSE	FALSE	FALSE	FALSE	FALSE	FALSE
KDM3B	NP_057688.3	0	0	0	1	-5.3755	-4.898	TRUE	TRUE	TRUE	FALSE	FALSE	FALSE	TRUE	FALSE	FALSE	TRUE
KDM4B	NP_055830.1	0	0	1	1	-5.41	-5.5805	FALSE	TRUE	TRUE	FALSE	FALSE	FALSE	TRUE	FALSE	FALSE	TRUE
KDM4C	NP_055876.2	0	0	0	1		-4.686	FALSE	FALSE	FALSE	FALSE	FALSE	FALSE	FALSE	FALSE	FALSE	FALSE
KDM4D	NP_060509.2	0	0	1	0		-5.6155	FALSE	FALSE	FALSE	FALSE	FALSE	FALSE	FALSE	FALSE	FALSE	FALSE
KDM5A	NP_001036068.1	0	0	0	1	-3.661	-4.7825	FALSE	FALSE	FALSE	FALSE	FALSE	FALSE	TRUE	FALSE	FALSE	TRUE
KDM7A	NP_085150.1	0	0	0	1		-4.86	FALSE	FALSE	FALSE	FALSE	FALSE	FALSE	FALSE	FALSE	FALSE	FALSE
KDM8	NP_001138820.1	0	0	0	2	-3.192	-4.746	FALSE	FALSE	FALSE	FALSE	FALSE	FALSE	FALSE	FALSE	FALSE	FALSE
KDR	NP_002244.1	0	0	0	1	-4.974	-4.872	FALSE	FALSE	FALSE	FALSE	FALSE	FALSE	FALSE	FALSE	FALSE	FALSE
KHSRP	NP_003676.2	0	0	0	1	-4.8025	-4.9325	FALSE	FALSE	FALSE	FALSE	FALSE	FALSE	FALSE	FALSE	FALSE	FALSE
KIAA2026	NP_001017969.2	0	0	0	1	-3.383	-4.874	FALSE	FALSE	FALSE	FALSE	FALSE	TRUE	FALSE	FALSE	FALSE	FALSE
KIF11	NP_004514.2	0	0	1	2	-5.337	-5.52	FALSE	TRUE	TRUE	FALSE	FALSE	FALSE	TRUE	TRUE	FALSE	TRUE
KIF3A	NP_001287720.1	0	0	0	1	-3.79	-4.7235	FALSE	FALSE	FALSE	FALSE	FALSE	FALSE	FALSE	FALSE	FALSE	FALSE
KIF3C	NP_002245.4	0	0	0	1	-3.412	-4.9745	FALSE	FALSE	FALSE	FALSE	FALSE	FALSE	FALSE	FALSE	FALSE	FALSE
KIF4A	NP_036442.3	0	0	1	2	-4.7465	-5.062	FALSE	FALSE	FALSE	FALSE	FALSE	FALSE	TRUE	FALSE	FALSE	TRUE
KIF5A	NP_004975.2	0	0	2	1	-5.1055	-5.478	FALSE	TRUE	TRUE	FALSE	FALSE	FALSE	TRUE	FALSE	FALSE	TRUE
KIFAP3	NP_055785.2	0	0	0	1	-3.879	-4.805	FALSE	FALSE	FALSE	FALSE	FALSE	FALSE	FALSE	FALSE	FALSE	FALSE
KIRREL1	NP_060710.3	0	0	0	2	-3.1775	-4.7135	FALSE	FALSE	FALSE	FALSE	FALSE	FALSE	FALSE	FALSE	FALSE	FALSE
KIT	NP_000213.1	0	0	0	2	-4.996	-4.6645	FALSE	FALSE	FALSE	FALSE	FALSE	FALSE	TRUE	FALSE	FALSE	TRUE
KLC2	NP_001128247.1	0	0	0	1		-4.6625	FALSE	FALSE	FALSE	FALSE	FALSE	FALSE	FALSE	FALSE	FALSE	FALSE
KLF7	NP_001257872.1	0	0	1	0	-5.423	-5.1515	TRUE	TRUE	TRUE	FALSE	FALSE	FALSE	TRUE	TRUE	TRUE	TRUE
KLHDC10	NP_055812.1	0	0	0	1	-4.3075	-4.723	FALSE	FALSE	FALSE	FALSE	FALSE	FALSE	FALSE	FALSE	FALSE	FALSE
KLHL10	NP_689680.2	0	0	0	1		-4.844	FALSE	FALSE	FALSE	FALSE	FALSE	FALSE	FALSE	FALSE	FALSE	FALSE
KLHL13	NP_277030.2	0	0	0	1		-4.913	FALSE	FALSE	FALSE	FALSE	FALSE	FALSE	FALSE	FALSE	FALSE	FALSE
KLHL15	NP_085127.2	0	0	1	2	-6.353	-5.625	FALSE	TRUE	TRUE	FALSE	FALSE	FALSE	TRUE	FALSE	FALSE	TRUE
KLHL2	NP_001154993.1	0	0	1	0	-4.574	-5.3855	FALSE	FALSE	FALSE	FALSE	FALSE	FALSE	FALSE	FALSE	FALSE	FALSE
KLHL20	NP_055273.2	0	0	0	3	-3.788	-4.827	FALSE	FALSE	FALSE	FALSE	FALSE	FALSE	FALSE	FALSE	FALSE	FALSE
KLHL3	NP_059111.2	0	0	1	0	-3.345	-5.207	FALSE	FALSE	FALSE	FALSE	FALSE	FALSE	FALSE	FALSE	FALSE	FALSE
KLHL36	NP_079007.2	0	0	0	2	-4.259	-4.752	FALSE	FALSE	FALSE	FALSE	FALSE	FALSE	FALSE	FALSE	FALSE	FALSE
KPNA3	NP_002258.2	0	0	0	1	-4.829	-4.6465	FALSE	FALSE	FALSE	FALSE	FALSE	FALSE	FALSE	FALSE	FALSE	FALSE
KPNA4	NP_002259.1	0	0	1	1		-5.0765	FALSE	FALSE	FALSE	FALSE	FALSE	FALSE	FALSE	FALSE	FALSE	FALSE
KPNA6	NP_036448.1	0	0	0	1		-4.803	FALSE	FALSE	FALSE	FALSE	FALSE	FALSE	FALSE	FALSE	FALSE	FALSE
KPNB1	NP_002256.2	0	0	0	1		-4.8715	FALSE	FALSE	FALSE	FALSE	FALSE	FALSE	FALSE	FALSE	FALSE	FALSE
KRT1	NP_006112.3	0	0	1	0	-5.009	-5.206	FALSE	FALSE	FALSE	FALSE	FALSE	FALSE	FALSE	FALSE	FALSE	FALSE
KRT12	NP_000214.1	0	0	0	4		-4.6575	FALSE	FALSE	FALSE	FALSE	FALSE	FALSE	FALSE	FALSE	FALSE	FALSE
KRT15	NP_002266.3	0	0	1	0	-2.925	-5.5815	FALSE	FALSE	FALSE	FALSE	FALSE	FALSE	FALSE	FALSE	FALSE	FALSE
KRT32	NP_002269.3	0	0	0	3	-3.8425	-4.631	FALSE	FALSE	FALSE	FALSE	FALSE	FALSE	FALSE	FALSE	FALSE	FALSE
KRT72	NP_001139697.1	0	0	0	1	-3.1325	-4.6365	FALSE	FALSE	FALSE	FALSE	FALSE	FALSE	FALSE	FALSE	FALSE	FALSE
KRT82	NP_149022.3	0	0	1	0	-3.5425	-5.197	FALSE	FALSE	FALSE	FALSE	FALSE	FALSE	FALSE	FALSE	FALSE	FALSE
KRT84	NP_149034.2	0	0	0	1	-3.546	-4.6915	FALSE	FALSE	FALSE	FALSE	FALSE	FALSE	FALSE	FALSE	FALSE	FALSE
KRTAP10-3	NP_941969.2	0	0	0	2	-2.666	-4.731	FALSE	FALSE	FALSE	FALSE	FALSE	FALSE	FALSE	FALSE	FALSE	FALSE
KRTAP10-6	NP_941961.3	0	0	1	0		-5.7355	FALSE	FALSE	FALSE	FALSE	FALSE	FALSE	FALSE	FALSE	FALSE	FALSE
KRTAP13-3	NP_853653.1	0	0	0	1		-4.6845	FALSE	FALSE	FALSE	FALSE	FALSE	FALSE	FALSE	FALSE	FALSE	FALSE
L3MBTL4	NP_775735.2	0	0	0	2		-4.8055	FALSE	FALSE	FALSE	FALSE	FALSE	FALSE	FALSE	FALSE	FALSE	FALSE
LACC1	NP_001121775.1	0	0	0	1		-4.621	FALSE	FALSE	FALSE	FALSE	FALSE	FALSE	FALSE	FALSE	FALSE	FALSE
LALBA	NP_002280.1	0	0	0	1		-4.7645	FALSE	FALSE	FALSE	FALSE	FALSE	FALSE	FALSE	FALSE	FALSE	FALSE
LEF1	NP_057353.1	0	0	0	1	-3.5305	-4.6305	FALSE	FALSE	FALSE	FALSE	FALSE	FALSE	FALSE	FALSE	FALSE	FALSE
LEO1	NP_620147.1	0	0	0	1	-4.519	-4.816	FALSE	FALSE	FALSE	FALSE	FALSE	FALSE	FALSE	FALSE	FALSE	FALSE
LGR4	NP_060960.2	0	0	0	7	-3.7475	-5.0305	FALSE	FALSE	FALSE	FALSE	FALSE	FALSE	FALSE	FALSE	FALSE	FALSE
LHX2	NP_004780.3	0	0	1	2	-4.905	-5.335	FALSE	FALSE	FALSE	FALSE	FALSE	FALSE	FALSE	FALSE	FALSE	FALSE
LHX6	NP_055183.2	0	0	1	0	-5.5905	-5.643	FALSE	TRUE	TRUE	FALSE	FALSE	FALSE	FALSE	FALSE	FALSE	FALSE
LHX9	NP_064589.2	0	0	0	2	-4.6075	-4.7935	FALSE	FALSE	FALSE	FALSE	FALSE	FALSE	FALSE	FALSE	FALSE	FALSE
LILRA2	NP_001277200.1	0	0	19	0		-5.329	FALSE	FALSE	FALSE	FALSE	FALSE	FALSE	FALSE	FALSE	FALSE	FALSE
LILRB2	NP_005865.3	0	0	0	8		-4.8065	FALSE	FALSE	FALSE	FALSE	FALSE	FALSE	FALSE	FALSE	FALSE	FALSE
LILRB4	NP_001381862.1	0	0	1	0	-2.022	-5.167	FALSE	FALSE	FALSE	FALSE	FALSE	FALSE	FALSE	FALSE	FALSE	FALSE
LIMD1	NP_055055.1	0	0	0	1		-4.805	FALSE	FALSE	FALSE	FALSE	FALSE	FALSE	FALSE	FALSE	FALSE	FALSE
LMNA	NP_005563.1	0	0	1	0	-4.049	-5.399	FALSE	FALSE	FALSE	FALSE	FALSE	FALSE	TRUE	FALSE	FALSE	TRUE
LMNB1	NP_005564.1	0	0	0	1	-4.6055	-4.8235	FALSE	FALSE	FALSE	FALSE	FALSE	FALSE	TRUE	FALSE	FALSE	TRUE
LMX1A	NP_001167540.1	0	0	0	1	-4.3455	-4.9625	FALSE	FALSE	FALSE	FALSE	FALSE	FALSE	FALSE	FALSE	FALSE	FALSE
LOC84773-CYHR1	NP_612505.1	0	0	0	1	-3.996	-4.688	FALSE	FALSE	FALSE	FALSE	FALSE	FALSE	FALSE	FALSE	FALSE	FALSE
LONP1	NP_004784.2	0	0	0	1	-4.202	-4.7185	FALSE	FALSE	FALSE	FALSE	FALSE	TRUE	TRUE	FALSE	FALSE	TRUE
LPAR3	NP_036284.1	0	0	0	1		-4.683	FALSE	FALSE	FALSE	FALSE	FALSE	FALSE	FALSE	FALSE	FALSE	FALSE
LPCAT1	NP_079106.3	0	0	0	1		-4.998	FALSE	FALSE	FALSE	FALSE	FALSE	FALSE	FALSE	FALSE	FALSE	FALSE
LPIN3	NP_001288789.1	0	0	0	1	-3.543	-4.742	FALSE	FALSE	FALSE	FALSE	FALSE	FALSE	FALSE	FALSE	FALSE	FALSE
LRCH1	NP_001157683.2	0	0	0	1	-4.86	-4.9315	FALSE	FALSE	FALSE	FALSE	FALSE	FALSE	FALSE	FALSE	FALSE	FALSE
LRP12	NP_038465.1	0	0	0	1	-3.64	-4.677	FALSE	FALSE	FALSE	FALSE	FALSE	FALSE	FALSE	FALSE	FALSE	FALSE
LRP6	NP_002327.2	0	0	0	1	-4.595	-4.743	FALSE	FALSE	FALSE	FALSE	FALSE	FALSE	TRUE	FALSE	FALSE	TRUE
LRRC25	NP_660299.2	0	0	0	1		-4.779	FALSE	FALSE	FALSE	FALSE	FALSE	FALSE	FALSE	FALSE	FALSE	FALSE
LRRC58	NP_001093148.1	0	0	0	1	-2.7565	-4.797	FALSE	FALSE	FALSE	FALSE	FALSE	FALSE	FALSE	FALSE	FALSE	FALSE
LRRC59	NP_060979.2	0	0	0	3		-4.713	FALSE	FALSE	FALSE	FALSE	FALSE	FALSE	FALSE	FALSE	FALSE	FALSE
LRRFIP1	NP_004726.2	0	0	0	1		-4.9155	FALSE	FALSE	FALSE	FALSE	FALSE	FALSE	FALSE	FALSE	FALSE	FALSE
LRRTM1	NP_849161.2	0	0	0	1	-3.3775	-4.7905	FALSE	FALSE	FALSE	FALSE	FALSE	FALSE	FALSE	FALSE	FALSE	FALSE
LSAMP	NP_001305844.1	0	0	1	0	-3.263	-5.4515	FALSE	FALSE	FALSE	FALSE	FALSE	FALSE	FALSE	FALSE	FALSE	FALSE
LSS	NP_001001438.1	0	0	0	1		-4.717	FALSE	FALSE	FALSE	FALSE	FALSE	FALSE	FALSE	FALSE	FALSE	FALSE
LTB	NP_002332.1	0	0	0	1		-4.632	FALSE	FALSE	FALSE	FALSE	FALSE	FALSE	FALSE	FALSE	FALSE	FALSE
LTBR	NP_002333.1	0	0	0	1		-4.7885	FALSE	FALSE	FALSE	FALSE	FALSE	FALSE	FALSE	FALSE	FALSE	FALSE
LTN1	NP_056380.3	0	0	0	1	-3.988	-4.778	FALSE	FALSE	FALSE	FALSE	FALSE	FALSE	FALSE	FALSE	FALSE	FALSE
LUC7L3	NP_006098.2	0	0	1	0		-5.2575	FALSE	FALSE	FALSE	FALSE	FALSE	FALSE	FALSE	FALSE	FALSE	FALSE
MACROH2A1	NP_613258.2	0	0	0	1	-5.5275	-4.631	FALSE	TRUE	TRUE	FALSE	FALSE	FALSE	FALSE	FALSE	FALSE	FALSE
MACROH2A2	NP_061119.1	0	0	0	1		-4.6655	FALSE	FALSE	FALSE	FALSE	FALSE	FALSE	FALSE	FALSE	FALSE	FALSE
MAEA	NP_001017405.1	0	0	0	1	-4.591	-4.881	FALSE	FALSE	FALSE	FALSE	FALSE	FALSE	FALSE	FALSE	FALSE	FALSE
MAGEA1	NP_004979.3	0	0	1	19	-5.104	-5.127	FALSE	TRUE	FALSE	FALSE	FALSE	TRUE	FALSE	FALSE	FALSE	FALSE
MAGEA11	NP_005357.2	0	0	1	0	-4.3395	-5.1255	FALSE	FALSE	FALSE	FALSE	FALSE	FALSE	FALSE	FALSE	FALSE	FALSE
MAGEA12	NP_001159858.1	0	0	0	1		-4.856	FALSE	FALSE	FALSE	FALSE	FALSE	FALSE	FALSE	FALSE	FALSE	FALSE
MAGEA3	NP_005353.1	0	0	0	1		-4.7195	FALSE	FALSE	FALSE	FALSE	FALSE	FALSE	FALSE	FALSE	FALSE	FALSE
MAGEA8	NP_001159873.1	0	0	0	3		-4.7975	FALSE	FALSE	FALSE	FALSE	FALSE	FALSE	FALSE	FALSE	FALSE	FALSE
MAGEB4	NP_002358.1	0	0	0	1		-4.9145	FALSE	FALSE	FALSE	FALSE	FALSE	FALSE	FALSE	FALSE	FALSE	FALSE
MAGOH	NP_002361.1	0	0	0	1	-4.01	-4.9055	FALSE	FALSE	FALSE	FALSE	FALSE	FALSE	FALSE	FALSE	FALSE	FALSE
MALT1	NP_006776.1	0	0	0	8	-5.004	-4.7515	FALSE	FALSE	FALSE	FALSE	FALSE	FALSE	FALSE	FALSE	FALSE	FALSE
MAP2K4	NP_001268364.1	0	0	2	0	-5.797	-5.299	FALSE	TRUE	TRUE	FALSE	FALSE	FALSE	FALSE	FALSE	FALSE	FALSE
MAP2K5	NP_660143.1	0	0	0	2		-4.7035	FALSE	FALSE	FALSE	FALSE	FALSE	FALSE	FALSE	FALSE	FALSE	FALSE
MAP2K6	NP_002749.2	0	0	1	0		-5.0915	FALSE	FALSE	FALSE	FALSE	FALSE	FALSE	FALSE	FALSE	FALSE	FALSE
MAP3K1	NP_005912.1	0	0	2	1	-3.7195	-5.1075	FALSE	FALSE	FALSE	FALSE	FALSE	FALSE	TRUE	FALSE	FALSE	TRUE
MAP3K14	NP_003945.2	0	0	1	0		-5.5925	FALSE	FALSE	FALSE	FALSE	FALSE	FALSE	FALSE	FALSE	FALSE	FALSE
MAP3K2	NP_006600.3	0	0	0	2	-3.813	-4.9835	FALSE	FALSE	FALSE	FALSE	FALSE	FALSE	FALSE	FALSE	FALSE	FALSE
MAP3K3	NP_002392.2	0	0	0	1		-4.638	FALSE	FALSE	FALSE	FALSE	FALSE	FALSE	FALSE	FALSE	FALSE	FALSE
MAP4K5	NP_006566.2	0	0	0	1	-4.86	-4.705	FALSE	FALSE	FALSE	FALSE	FALSE	FALSE	FALSE	FALSE	FALSE	FALSE
MAPK1	NP_002736.3	0	0	1	1	-4.758	-5.3125	FALSE	FALSE	FALSE	FALSE	FALSE	FALSE	TRUE	FALSE	FALSE	TRUE
MAPK14	NP_001306.1	0	0	0	2		-4.9765	FALSE	FALSE	FALSE	FALSE	FALSE	FALSE	FALSE	FALSE	FALSE	FALSE
MAPK8	NP_620637.1	0	0	1	0	-4.4915	-5.233	FALSE	FALSE	FALSE	FALSE	FALSE	FALSE	FALSE	FALSE	FALSE	FALSE
MAPKAPK2	NP_116584.2	0	0	0	2	-3.4035	-4.6595	FALSE	FALSE	FALSE	FALSE	FALSE	FALSE	FALSE	FALSE	FALSE	FALSE
MAPKAPK3	NP_004626.1	0	0	0	1		-4.6725	FALSE	FALSE	FALSE	FALSE	FALSE	FALSE	FALSE	FALSE	FALSE	FALSE
MAPRE2	NP_055083.1	0	0	0	1		-4.975	FALSE	FALSE	FALSE	FALSE	FALSE	FALSE	TRUE	FALSE	FALSE	TRUE
MARCHF5	NP_060294.1	0	0	0	1		-4.6365	FALSE	FALSE	FALSE	FALSE	FALSE	FALSE	FALSE	FALSE	FALSE	FALSE
MARCHF6	NP_005876.2	0	0	1	1	-3.568	-5.2685	FALSE	FALSE	FALSE	FALSE	FALSE	FALSE	FALSE	FALSE	FALSE	FALSE
MARK1	NP_061120.3	0	0	0	1	-3.594	-4.64	FALSE	FALSE	FALSE	FALSE	FALSE	FALSE	FALSE	FALSE	FALSE	FALSE
MARK2	NP_001034558.2	0	0	0	2	-4.686	-5.0075	FALSE	FALSE	FALSE	FALSE	FALSE	FALSE	FALSE	FALSE	FALSE	FALSE
MAST1	NP_055790.1	0	0	0	1	-4.847	-4.6545	TRUE	FALSE	TRUE	FALSE	FALSE	FALSE	TRUE	TRUE	TRUE	TRUE
MAU2	NP_056144.3	0	0	2	0		-5.082	FALSE	FALSE	FALSE	FALSE	FALSE	FALSE	TRUE	FALSE	FALSE	TRUE
MBNL1	NP_066368.2	0	0	0	2	-3.365	-4.755	FALSE	FALSE	FALSE	FALSE	FALSE	FALSE	FALSE	FALSE	FALSE	FALSE
MED12	NP_005111.2	0	0	0	2	-4.885	-4.701	TRUE	FALSE	TRUE	FALSE	FALSE	FALSE	TRUE	TRUE	TRUE	TRUE
MED23	NP_057063.2	0	0	0	1	-3.957	-4.716	FALSE	FALSE	FALSE	FALSE	FALSE	FALSE	TRUE	FALSE	FALSE	TRUE
MET	NP_001120972.1	0	0	0	1	-4.2985	-4.718	FALSE	FALSE	FALSE	FALSE	FALSE	FALSE	FALSE	FALSE	FALSE	FALSE
METTL3	NP_062826.2	0	0	0	1		-4.666	FALSE	FALSE	FALSE	FALSE	FALSE	FALSE	FALSE	FALSE	FALSE	FALSE
METTL9	NP_057109.3	0	0	0	1		-4.99	FALSE	FALSE	FALSE	FALSE	FALSE	FALSE	FALSE	FALSE	FALSE	FALSE
MFSD14B	NP_115947.2	0	0	0	1	-4.365	-4.8075	FALSE	FALSE	FALSE	FALSE	FALSE	FALSE	FALSE	FALSE	FALSE	FALSE
MFSD2B	NP_001333809.1	0	0	0	1	-3.011	-4.9715	FALSE	FALSE	FALSE	FALSE	FALSE	FALSE	FALSE	FALSE	FALSE	FALSE
MGAT3	NP_001091740.1	0	0	1	0		-5.075	FALSE	FALSE	FALSE	FALSE	FALSE	FALSE	FALSE	FALSE	FALSE	FALSE
MGAT4A	NP_036346.1	0	0	0	2		-4.825	FALSE	FALSE	FALSE	FALSE	FALSE	FALSE	FALSE	FALSE	FALSE	FALSE
MGAT5B	NP_945193.1	0	0	0	1	-3.867	-4.7515	FALSE	FALSE	FALSE	FALSE	FALSE	FALSE	FALSE	FALSE	FALSE	FALSE
MICAL3	NP_056056.2	0	0	0	1	-4.0805	-5.021	FALSE	FALSE	FALSE	FALSE	FALSE	FALSE	FALSE	FALSE	FALSE	FALSE
MID1	NP_000372.1	0	0	0	1		-4.767	FALSE	FALSE	FALSE	FALSE	FALSE	FALSE	TRUE	FALSE	FALSE	TRUE
MINK1	NP_722549.2	0	0	0	1	-4.183	-4.639	FALSE	FALSE	FALSE	FALSE	FALSE	FALSE	FALSE	FALSE	FALSE	FALSE
MIS18BP1	NP_060823.3	0	0	0	4	-3.4175	-4.667	FALSE	FALSE	FALSE	FALSE	FALSE	FALSE	FALSE	FALSE	FALSE	FALSE
MLLT1	NP_005925.2	0	0	0	1	-4.18	-4.828	FALSE	FALSE	FALSE	FALSE	FALSE	FALSE	FALSE	FALSE	FALSE	FALSE
MLLT10	NP_004632.1	0	0	0	3	-3.716	-5.039	FALSE	FALSE	FALSE	FALSE	FALSE	FALSE	FALSE	FALSE	FALSE	FALSE
MLLT3	NP_004520.2	0	0	0	1	-4.144	-4.821	FALSE	FALSE	FALSE	FALSE	FALSE	FALSE	FALSE	FALSE	FALSE	FALSE
MMP16	NP_005932.2	0	0	0	1	-4.4605	-4.827	FALSE	FALSE	FALSE	FALSE	FALSE	FALSE	FALSE	FALSE	FALSE	FALSE
MON2	NP_055841.2	0	0	0	1	-4.5865	-4.7105	FALSE	FALSE	FALSE	FALSE	FALSE	FALSE	FALSE	FALSE	FALSE	FALSE
MORC1	NP_055244.3	0	0	0	1	-3.139	-4.659	FALSE	FALSE	FALSE	FALSE	FALSE	FALSE	FALSE	FALSE	FALSE	FALSE
MOSPD1	NP_062456.1	0	0	0	1		-4.725	FALSE	FALSE	FALSE	FALSE	FALSE	FALSE	FALSE	FALSE	FALSE	FALSE
MPP1	NP_002427.1	0	0	0	1		-4.6635	FALSE	FALSE	FALSE	FALSE	FALSE	FALSE	FALSE	FALSE	FALSE	FALSE
MRC2	NP_006030.2	0	0	0	4	-3.908	-4.775	FALSE	FALSE	FALSE	FALSE	FALSE	FALSE	FALSE	FALSE	FALSE	FALSE
MRPL2	NP_057034.2	0	0	0	3		-5.0005	FALSE	FALSE	FALSE	FALSE	FALSE	FALSE	FALSE	FALSE	FALSE	FALSE
MRTFA	NP_001305068.1	0	0	0	1	-3.1195	-4.6185	FALSE	FALSE	FALSE	FALSE	FALSE	FALSE	FALSE	FALSE	FALSE	FALSE
MRTFB	NP_054767.3	0	0	0	1	-3.4505	-4.6595	FALSE	FALSE	FALSE	FALSE	FALSE	FALSE	FALSE	FALSE	FALSE	FALSE
MTERF3	NP_057026.3	0	0	0	5		-4.746	FALSE	FALSE	FALSE	FALSE	FALSE	FALSE	FALSE	FALSE	FALSE	FALSE
MTF1	NP_005946.2	0	0	0	2		-4.8745	FALSE	FALSE	FALSE	FALSE	FALSE	FALSE	TRUE	FALSE	FALSE	TRUE
MTMR1	NP_001340919.1	0	0	0	1		-4.977	FALSE	FALSE	FALSE	FALSE	FALSE	FALSE	FALSE	FALSE	FALSE	FALSE
MTMR3	NP_066576.1	0	0	0	1	-4.7125	-4.642	FALSE	FALSE	FALSE	FALSE	FALSE	FALSE	FALSE	FALSE	FALSE	FALSE
MTREX	NP_056175.3	0	0	1	2		-5.32	FALSE	FALSE	FALSE	FALSE	FALSE	FALSE	FALSE	FALSE	FALSE	FALSE
MYB	NP_001123645.1	0	0	0	1		-4.971	FALSE	FALSE	FALSE	FALSE	FALSE	FALSE	FALSE	FALSE	FALSE	FALSE
MYBPC1	NP_002456.2	0	0	0	1	-4.05	-4.766	FALSE	FALSE	FALSE	FALSE	FALSE	FALSE	TRUE	FALSE	FALSE	TRUE
MYH10	NP_005955.3	0	0	1	3	-4.2625	-5.334	FALSE	FALSE	FALSE	FALSE	FALSE	FALSE	TRUE	FALSE	FALSE	TRUE
MYH11	NP_001035202.1	0	0	0	1	-3.6	-4.809	FALSE	FALSE	FALSE	FALSE	FALSE	FALSE	TRUE	FALSE	FALSE	TRUE
MYH3	NP_002461.2	0	0	2	3	-5.263	-5.837	FALSE	TRUE	TRUE	FALSE	FALSE	FALSE	TRUE	FALSE	FALSE	TRUE
MYH4	NP_060003.2	0	0	10	3	-3.8	-5.558	FALSE	FALSE	FALSE	FALSE	FALSE	FALSE	FALSE	FALSE	FALSE	FALSE
MYL4	NP_001002841.1	0	0	0	1		-4.6535	FALSE	FALSE	FALSE	FALSE	FALSE	FALSE	FALSE	FALSE	FALSE	FALSE
MYO16	NP_055826.1	0	0	0	2	-4.0485	-4.997	FALSE	FALSE	FALSE	FALSE	FALSE	FALSE	FALSE	FALSE	FALSE	FALSE
MYO1D	NP_056009.1	0	0	0	1	-2.9245	-4.738	FALSE	FALSE	FALSE	FALSE	FALSE	FALSE	FALSE	FALSE	FALSE	FALSE
MYRF	NP_001120864.1	0	0	0	1	-4.6225	-4.711	FALSE	FALSE	FALSE	FALSE	FALSE	FALSE	TRUE	FALSE	FALSE	TRUE
MYRFL	NP_872336.2	0	0	0	2	-2.998	-4.852	FALSE	FALSE	FALSE	FALSE	FALSE	FALSE	FALSE	FALSE	FALSE	FALSE
NAA35	NP_078911.3	0	0	29	1	-4.0385	-5.263	FALSE	FALSE	FALSE	FALSE	FALSE	FALSE	FALSE	FALSE	FALSE	FALSE
NACA	NP_001352825.1	0	0	0	2	-5.0685	-4.9465	FALSE	TRUE	TRUE	FALSE	FALSE	FALSE	FALSE	FALSE	FALSE	FALSE
NALCN	NP_443099.1	0	0	0	2	-4.4095	-5.04	TRUE	FALSE	TRUE	FALSE	FALSE	FALSE	TRUE	FALSE	FALSE	TRUE
NAP1L1	NP_004528.1	0	0	0	1	-3.9855	-4.808	FALSE	FALSE	FALSE	FALSE	FALSE	FALSE	FALSE	FALSE	FALSE	FALSE
NCOA1	NP_003734.3	0	0	0	1	-3.1985	-4.7665	FALSE	FALSE	FALSE	FALSE	FALSE	FALSE	FALSE	FALSE	FALSE	FALSE
NCOA2	NP_001308632.1	0	0	1	0	-4.8775	-5.151	FALSE	FALSE	FALSE	FALSE	FALSE	FALSE	FALSE	FALSE	FALSE	FALSE
NCOA6	NP_054790.2	0	0	0	3	-3.219	-4.873	FALSE	FALSE	FALSE	FALSE	FALSE	FALSE	FALSE	FALSE	FALSE	FALSE
NDST3	NP_004775.1	0	0	1	1	-2.9095	-5.271	FALSE	FALSE	FALSE	FALSE	FALSE	FALSE	FALSE	FALSE	FALSE	FALSE
NDST4	NP_072091.1	0	0	0	3		-5.014	FALSE	FALSE	FALSE	FALSE	FALSE	FALSE	FALSE	FALSE	FALSE	FALSE
NECTIN3	NP_056295.1	0	0	0	1	-3.7615	-4.8625	FALSE	FALSE	FALSE	FALSE	FALSE	FALSE	FALSE	FALSE	FALSE	FALSE
NEFL	NP_006149.2	0	0	0	3	-4.4075	-4.72	FALSE	FALSE	FALSE	FALSE	FALSE	FALSE	FALSE	FALSE	FALSE	FALSE
NEK6	NP_001138473.1	0	0	1	0		-5.079	FALSE	FALSE	FALSE	FALSE	FALSE	FALSE	FALSE	FALSE	FALSE	FALSE
NEUROD2	NP_006151.3	0	0	0	1	-5.66	-4.653	FALSE	TRUE	TRUE	FALSE	FALSE	FALSE	FALSE	FALSE	FALSE	FALSE
NEUROD6	NP_073565.2	0	0	0	2	-3.3605	-4.9235	FALSE	FALSE	FALSE	FALSE	FALSE	FALSE	FALSE	FALSE	FALSE	FALSE
NFE2L2	NP_006155.2	0	0	0	1	-5.016	-4.6595	FALSE	FALSE	FALSE	FALSE	FALSE	FALSE	TRUE	FALSE	FALSE	TRUE
NFIB	NP_001177666.1	0	0	0	2	-5.1175	-4.7965	FALSE	TRUE	TRUE	FALSE	FALSE	FALSE	TRUE	FALSE	FALSE	TRUE
NFKB1	NP_003989.2	0	0	0	1	-3.4145	-4.7	FALSE	FALSE	FALSE	FALSE	FALSE	FALSE	FALSE	FALSE	FALSE	FALSE
NFYB	NP_006157.1	0	0	0	3	-4.9635	-4.9635	FALSE	FALSE	FALSE	FALSE	FALSE	FALSE	FALSE	FALSE	FALSE	FALSE
NHS	NP_938011.1	0	0	0	1	-3.975	-4.65	FALSE	FALSE	FALSE	FALSE	FALSE	FALSE	TRUE	FALSE	FALSE	TRUE
NINJ2	NP_057617.3	0	0	0	1	-3.1575	-4.989	FALSE	FALSE	FALSE	FALSE	FALSE	FALSE	FALSE	FALSE	FALSE	FALSE
NIPA1	NP_653200.2	0	0	0	1		-4.6665	FALSE	FALSE	FALSE	FALSE	FALSE	FALSE	FALSE	FALSE	FALSE	FALSE
NIPA2	NP_001171818.1	0	0	1	0		-5.179	FALSE	FALSE	FALSE	FALSE	FALSE	FALSE	FALSE	FALSE	FALSE	FALSE
NIPAL3	NP_065181.1	0	0	0	1		-4.9615	FALSE	FALSE	FALSE	FALSE	FALSE	FALSE	FALSE	FALSE	FALSE	FALSE
NKAIN3	NP_001291462.1	0	0	0	1	-2.994	-5.015	FALSE	FALSE	FALSE	FALSE	FALSE	FALSE	FALSE	FALSE	FALSE	FALSE
NLGN3	NP_061850.2	0	0	1	2	-4.958	-5.96	FALSE	FALSE	FALSE	FALSE	FALSE	FALSE	TRUE	FALSE	FALSE	TRUE
NLK	NP_057315.3	0	0	1	0	-3.971	-5.904	FALSE	FALSE	FALSE	FALSE	FALSE	FALSE	FALSE	FALSE	FALSE	FALSE
NLRP3	NP_004886.3	0	0	1	1	-2.944	-5.402	FALSE	FALSE	FALSE	FALSE	FALSE	FALSE	FALSE	FALSE	FALSE	TRUE
NOC3L	NP_071896.8	0	0	0	1	-3.707	-4.757	FALSE	FALSE	FALSE	FALSE	FALSE	FALSE	FALSE	FALSE	FALSE	FALSE
NOS1AP	NP_055512.1	0	0	0	1		-4.7135	FALSE	FALSE	FALSE	FALSE	FALSE	FALSE	FALSE	FALSE	FALSE	FALSE
NOVA1	NP_002506.2	0	0	0	1	-3.719	-4.9085	FALSE	FALSE	FALSE	FALSE	FALSE	FALSE	FALSE	FALSE	FALSE	FALSE
NOVA2	NP_002507.1	0	0	1	1	-4.7275	-5.408	FALSE	FALSE	FALSE	FALSE	FALSE	FALSE	TRUE	FALSE	FALSE	TRUE
NPAS2	NP_002509.2	0	0	0	1	-3.777	-4.684	FALSE	FALSE	FALSE	FALSE	FALSE	FALSE	FALSE	FALSE	FALSE	FALSE
NPAS4	NP_849195.2	0	0	0	1	-3.322	-4.8065	FALSE	FALSE	FALSE	FALSE	FALSE	FALSE	FALSE	FALSE	FALSE	FALSE
NPY1R	NP_000900.1	0	0	0	1	-3.769	-5.046	FALSE	FALSE	FALSE	FALSE	FALSE	FALSE	FALSE	FALSE	FALSE	FALSE
NR2F6	NP_005225.2	0	0	1	0	-3.537	-5.2505	FALSE	FALSE	FALSE	FALSE	FALSE	FALSE	FALSE	FALSE	FALSE	FALSE
NR3C2	NP_000892.2	0	0	0	1		-4.811	FALSE	FALSE	FALSE	FALSE	FALSE	FALSE	FALSE	FALSE	FALSE	FALSE
NR5A1	NP_004950.2	0	0	1	0	-4.598	-5.1565	FALSE	FALSE	FALSE	FALSE	FALSE	FALSE	TRUE	FALSE	FALSE	TRUE
NR6A1	NP_201591.2	0	0	0	1	-4.062	-4.6315	FALSE	FALSE	FALSE	FALSE	FALSE	FALSE	FALSE	FALSE	FALSE	FALSE
NRF1	NP_001280092.1	0	0	0	1	-4.16	-4.6645	FALSE	FALSE	FALSE	FALSE	FALSE	FALSE	FALSE	FALSE	FALSE	FALSE
NRG1	NP_039250.2	0	0	0	1	-3.043	-4.8795	FALSE	FALSE	FALSE	FALSE	FALSE	FALSE	FALSE	FALSE	FALSE	FALSE
NRXN1	NP_001129131.1	0	0	0	1	-3.628	-4.7375	FALSE	FALSE	FALSE	FALSE	FALSE	FALSE	TRUE	FALSE	FALSE	TRUE
NRXN2	NP_620060.1	0	0	0	1	-4.3045	-4.9555	FALSE	FALSE	FALSE	FALSE	FALSE	FALSE	TRUE	FALSE	FALSE	TRUE
NRXN3	NP_004787.2	0	0	0	1	-4.5245	-4.644	FALSE	FALSE	FALSE	FALSE	FALSE	FALSE	TRUE	FALSE	FALSE	TRUE
NSD3	NP_075447.1	0	0	0	1	-3.9105	-4.7325	FALSE	FALSE	FALSE	FALSE	FALSE	FALSE	FALSE	FALSE	FALSE	FALSE
NT5C3B	NP_443167.4	0	0	0	1	-3.0645	-4.6665	FALSE	FALSE	FALSE	FALSE	FALSE	FALSE	FALSE	FALSE	FALSE	FALSE
NT5DC2	NP_075059.1	0	0	0	1		-4.74	FALSE	FALSE	FALSE	FALSE	FALSE	FALSE	FALSE	FALSE	FALSE	FALSE
NTNG1	NP_055732.2	0	0	0	1	-3.6045	-4.7835	FALSE	FALSE	FALSE	FALSE	FALSE	FALSE	FALSE	FALSE	FALSE	TRUE
NTRK2	NP_006171.2	0	0	1	2	-4.6095	-5.1285	FALSE	FALSE	FALSE	FALSE	FALSE	FALSE	TRUE	FALSE	FALSE	TRUE
NUDT21	NP_008937.1	0	0	0	1	-4.658	-4.6255	FALSE	FALSE	FALSE	FALSE	FALSE	FALSE	FALSE	FALSE	FALSE	FALSE
NUF2	NP_113611.2	0	0	0	2	-4.205	-4.7255	FALSE	FALSE	FALSE	FALSE	FALSE	FALSE	FALSE	FALSE	FALSE	FALSE
NUP214	NP_005076.3	0	0	0	1	-3.418	-4.693	FALSE	FALSE	FALSE	FALSE	FALSE	FALSE	TRUE	FALSE	FALSE	TRUE
OBP2B	NP_001275916.1	0	0	0	2		-4.9505	FALSE	FALSE	FALSE	FALSE	FALSE	FALSE	FALSE	FALSE	FALSE	FALSE
OGA	NP_036347.1	0	0	0	1		-4.94	FALSE	FALSE	FALSE	FALSE	FALSE	FALSE	FALSE	FALSE	FALSE	FALSE
OLFM1	NP_001269540.1	0	0	0	2	-4.943	-4.6815	FALSE	FALSE	FALSE	FALSE	FALSE	FALSE	FALSE	FALSE	FALSE	FALSE
OMA1	NP_660286.1	0	0	0	4		-4.94	FALSE	FALSE	FALSE	FALSE	FALSE	FALSE	FALSE	FALSE	FALSE	FALSE
OPN5	NP_859528.1	0	0	0	3	-3.623	-4.702	FALSE	FALSE	FALSE	FALSE	FALSE	FALSE	FALSE	FALSE	FALSE	FALSE
OPRM1	NP_000905.3	0	0	0	1	-3.1325	-4.759	FALSE	FALSE	FALSE	FALSE	FALSE	FALSE	FALSE	FALSE	FALSE	FALSE
OR10H3	NP_039226.1	0	0	0	1	-2.665	-4.81	FALSE	FALSE	FALSE	FALSE	FALSE	FALSE	FALSE	FALSE	FALSE	FALSE
OR10S1	NP_001004474.2	0	0	0	1		-4.815	FALSE	FALSE	FALSE	FALSE	FALSE	FALSE	FALSE	FALSE	FALSE	FALSE
OR11H6	NP_001004480.1	0	0	0	1	-2.97	-4.801	FALSE	FALSE	FALSE	FALSE	FALSE	FALSE	FALSE	FALSE	FALSE	FALSE
OR1S2	NP_001004459.2	0	0	0	1		-4.637	FALSE	FALSE	FALSE	FALSE	FALSE	FALSE	FALSE	FALSE	FALSE	FALSE
OR2A5	NP_036497.1	0	0	0	1	-2.47	-4.738	FALSE	FALSE	FALSE	FALSE	FALSE	FALSE	FALSE	FALSE	FALSE	FALSE
OR2B2	NP_149046.2	0	0	0	1	-3.4575	-4.6215	FALSE	FALSE	FALSE	FALSE	FALSE	FALSE	FALSE	FALSE	FALSE	FALSE
OR2L2	NP_001004686.1	0	0	0	2	-3.106	-4.807	FALSE	FALSE	FALSE	FALSE	FALSE	TRUE	FALSE	FALSE	FALSE	FALSE
OR51F2	NP_001004753.2	0	0	0	2		-4.74	FALSE	FALSE	FALSE	FALSE	FALSE	FALSE	FALSE	FALSE	FALSE	FALSE
OR52A1	NP_036507.2	0	0	0	2	-2.394	-4.6635	FALSE	FALSE	FALSE	FALSE	FALSE	FALSE	FALSE	FALSE	FALSE	FALSE
OR5AP2	NP_001002925.1	0	0	0	1		-4.8515	FALSE	FALSE	FALSE	FALSE	FALSE	FALSE	FALSE	FALSE	FALSE	FALSE
OR5B2	NP_001005566.1	0	0	0	28		-4.878	FALSE	FALSE	FALSE	FALSE	FALSE	FALSE	FALSE	FALSE	FALSE	FALSE
OR5D14	NP_001004735.1	0	0	0	1		-4.641	FALSE	FALSE	FALSE	FALSE	FALSE	FALSE	FALSE	FALSE	FALSE	FALSE
OR5T1	NP_001004745.1	0	0	0	1		-4.663	FALSE	FALSE	FALSE	FALSE	FALSE	FALSE	FALSE	FALSE	FALSE	FALSE
OR6C75	NP_001005497.1	0	0	0	1	-3.886	-4.6905	FALSE	FALSE	FALSE	FALSE	FALSE	FALSE	FALSE	FALSE	FALSE	FALSE
OR6C76	NP_001005183.1	0	0	6	1	-3.371	-5.0755	FALSE	FALSE	FALSE	FALSE	FALSE	FALSE	FALSE	FALSE	FALSE	FALSE
OR6K2	NP_001005279.1	0	0	0	1	-4.098	-4.7335	FALSE	FALSE	FALSE	FALSE	FALSE	FALSE	FALSE	FALSE	FALSE	FALSE
OR6S1	NP_001001968.1	0	0	0	1		-4.6865	FALSE	FALSE	FALSE	FALSE	FALSE	FALSE	FALSE	FALSE	FALSE	FALSE
OR7A5	NP_001357411.1	0	0	0	2		-5.0375	FALSE	FALSE	FALSE	FALSE	FALSE	FALSE	FALSE	FALSE	FALSE	FALSE
OR7C1	NP_945182.1	0	0	7	0	-3.048	-5.071	FALSE	FALSE	FALSE	FALSE	FALSE	TRUE	FALSE	FALSE	FALSE	FALSE
OR7G2	NP_001005193.2	0	0	0	1		-4.7575	FALSE	FALSE	FALSE	FALSE	FALSE	FALSE	FALSE	FALSE	FALSE	FALSE
OR9G1	NP_001005213.1	0	0	0	2	-3.808	-4.6735	FALSE	FALSE	FALSE	FALSE	FALSE	FALSE	FALSE	FALSE	FALSE	FALSE
OR9I1	NP_001005211.1	0	0	0	1	-3.994	-4.699	FALSE	FALSE	FALSE	FALSE	FALSE	FALSE	FALSE	FALSE	FALSE	FALSE
OSBP	NP_002547.1	0	0	1	0	-4.426	-5.238	FALSE	FALSE	FALSE	FALSE	FALSE	FALSE	FALSE	FALSE	FALSE	FALSE
OSBPL8	NP_065892.1	0	0	0	1		-5.0005	FALSE	FALSE	FALSE	FALSE	FALSE	FALSE	FALSE	FALSE	FALSE	FALSE
OTUD5	NP_060072.1	0	0	0	5	-6.116	-4.7425	FALSE	TRUE	TRUE	FALSE	FALSE	FALSE	FALSE	FALSE	FALSE	FALSE
OTUD7A	NP_570971.1	0	0	0	1	-4.083	-4.6845	FALSE	FALSE	FALSE	FALSE	FALSE	FALSE	TRUE	FALSE	FALSE	TRUE
OXCT1	NP_000427.1	0	0	0	3		-5.0505	FALSE	FALSE	FALSE	FALSE	FALSE	FALSE	TRUE	FALSE	FALSE	TRUE
OXSR1	NP_005100.1	0	0	0	1	-3.4925	-5.0495	FALSE	FALSE	FALSE	FALSE	FALSE	FALSE	FALSE	FALSE	FALSE	FALSE
P4HA1	NP_000908.2	0	0	0	2		-4.7185	FALSE	FALSE	FALSE	FALSE	FALSE	FALSE	FALSE	FALSE	FALSE	FALSE
PABPC1	NP_002559.2	0	0	0	1	-3.906	-5.044	FALSE	FALSE	FALSE	FALSE	FALSE	FALSE	FALSE	FALSE	FALSE	FALSE
PABPC3	NP_112241.2	0	0	0	1		-4.915	FALSE	FALSE	FALSE	FALSE	FALSE	FALSE	FALSE	FALSE	FALSE	FALSE
PAF1	NP_061961.2	0	0	0	1	-4.225	-4.625	FALSE	FALSE	FALSE	FALSE	FALSE	FALSE	FALSE	FALSE	FALSE	FALSE
PAK1	NP_001122092.1	0	0	0	1	-3.758	-4.8645	FALSE	FALSE	FALSE	FALSE	FALSE	FALSE	TRUE	FALSE	FALSE	TRUE
PAN2	NP_001159751.2	0	0	0	1	-3.969	-4.719	FALSE	FALSE	FALSE	FALSE	FALSE	FALSE	TRUE	FALSE	FALSE	TRUE
PAPOLG	NP_075045.2	0	0	1	1	-4.0205	-5.43	FALSE	FALSE	FALSE	FALSE	FALSE	FALSE	FALSE	FALSE	FALSE	FALSE
PAQR6	NP_079173.2	0	0	0	1	-3.529	-4.782	FALSE	FALSE	FALSE	FALSE	FALSE	FALSE	FALSE	FALSE	FALSE	FALSE
PARP1	NP_001609.2	0	0	0	1	-3.8795	-4.8585	FALSE	FALSE	FALSE	FALSE	FALSE	FALSE	TRUE	FALSE	FALSE	TRUE
PARP14	NP_060024.2	0	0	0	1	-3.7435	-4.7755	FALSE	FALSE	FALSE	FALSE	FALSE	FALSE	FALSE	FALSE	FALSE	FALSE
PARP9	NP_001139574.1	0	0	0	1		-4.675	FALSE	FALSE	FALSE	FALSE	FALSE	FALSE	FALSE	FALSE	FALSE	FALSE
PARVA	NP_060692.3	0	0	0	2		-4.9225	FALSE	FALSE	FALSE	FALSE	FALSE	FALSE	FALSE	FALSE	FALSE	FALSE
PAX6	NP_001355847.1	0	0	0	2	-4.3585	-4.915	FALSE	FALSE	FALSE	FALSE	FALSE	FALSE	TRUE	FALSE	FALSE	TRUE
PAXBP1	NP_057715.2	0	0	0	1	-2.8725	-5.0415	FALSE	FALSE	FALSE	FALSE	FALSE	FALSE	FALSE	FALSE	FALSE	FALSE
PBRM1	NP_060783.3	0	0	0	4	-4.7655	-5.005	FALSE	FALSE	FALSE	FALSE	FALSE	FALSE	FALSE	FALSE	FALSE	FALSE
PCARE	NP_001025054.1	0	0	0	1	-3.115	-4.6325	FALSE	FALSE	FALSE	FALSE	FALSE	TRUE	TRUE	FALSE	FALSE	TRUE
PCBP1	NP_006187.2	0	0	1	0		-5.1925	FALSE	FALSE	FALSE	FALSE	FALSE	FALSE	FALSE	FALSE	FALSE	FALSE
PCDHA1	NP_061723.1	0	0	1	0	-3.045	-5.157	FALSE	FALSE	FALSE	FALSE	FALSE	FALSE	FALSE	FALSE	FALSE	FALSE
PCDHA11	NP_061725.1	0	0	0	4	-3.737	-4.671	FALSE	FALSE	FALSE	FALSE	FALSE	FALSE	FALSE	FALSE	FALSE	FALSE
PCDHA2	NP_061728.1	0	0	0	1		-4.6275	FALSE	FALSE	FALSE	FALSE	FALSE	FALSE	FALSE	FALSE	FALSE	FALSE
PCDHGB7	NP_061750.1	0	0	0	5	-3.695	-4.7405	FALSE	FALSE	FALSE	FALSE	FALSE	FALSE	FALSE	FALSE	FALSE	FALSE
PCED1A	NP_001258097.1	0	0	0	3	-3.24	-4.6385	FALSE	FALSE	FALSE	FALSE	FALSE	FALSE	FALSE	FALSE	FALSE	FALSE
PCGF3	NP_001304765.1	0	0	1	0	-4.7105	-6.388	FALSE	FALSE	FALSE	FALSE	FALSE	FALSE	FALSE	FALSE	FALSE	FALSE
PCGF5	NP_001243478.1	0	0	2	2	-4.188	-5.4805	FALSE	FALSE	FALSE	FALSE	FALSE	FALSE	FALSE	FALSE	FALSE	FALSE
PCNX2	NP_055616.3	0	0	0	1	-3.246	-5.023	FALSE	FALSE	FALSE	FALSE	FALSE	FALSE	FALSE	FALSE	FALSE	FALSE
PCSK2	NP_002585.2	0	0	0	4	-4.3815	-4.94	FALSE	FALSE	FALSE	FALSE	FALSE	FALSE	FALSE	FALSE	FALSE	FALSE
PDCD6IP	NP_001155901.1	0	0	0	1		-4.651	FALSE	FALSE	FALSE	FALSE	FALSE	FALSE	FALSE	FALSE	FALSE	FALSE
PDE10A	NP_001124162.1	0	0	0	1	-3.739	-4.927	FALSE	FALSE	FALSE	FALSE	FALSE	FALSE	TRUE	FALSE	FALSE	TRUE
PDE1B	NP_000915.1	0	0	0	1	-3.31	-4.739	FALSE	FALSE	FALSE	FALSE	FALSE	FALSE	FALSE	FALSE	FALSE	FALSE
PDE4A	NP_001104777.1	0	0	0	1		-4.6265	FALSE	FALSE	FALSE	FALSE	FALSE	FALSE	FALSE	FALSE	FALSE	FALSE
PDE8A	NP_002596.1	0	0	0	1	-4.001	-4.617	FALSE	FALSE	FALSE	FALSE	FALSE	FALSE	FALSE	FALSE	FALSE	FALSE
PDK2	NP_002602.2	0	0	0	2	-3.69	-4.9185	FALSE	FALSE	FALSE	FALSE	FALSE	FALSE	FALSE	FALSE	FALSE	FALSE
PELI2	NP_067078.1	0	0	0	1	-3.6875	-4.7265	FALSE	FALSE	FALSE	FALSE	FALSE	FALSE	FALSE	FALSE	FALSE	FALSE
PER2	NP_073728.1	0	0	0	1	-4.087	-4.7635	FALSE	FALSE	FALSE	FALSE	FALSE	FALSE	FALSE	FALSE	FALSE	FALSE
PFDN1	NP_002613.2	0	0	0	1		-4.7955	FALSE	FALSE	FALSE	FALSE	FALSE	FALSE	FALSE	FALSE	FALSE	FALSE
PHC2	NP_932157.1	0	0	0	1	-4.0545	-4.633	FALSE	FALSE	FALSE	FALSE	FALSE	FALSE	FALSE	FALSE	FALSE	FALSE
PHF12	NP_001028733.1	0	0	0	1	-4.2715	-4.718	FALSE	FALSE	FALSE	FALSE	FALSE	FALSE	FALSE	FALSE	FALSE	FALSE
PI4KB	NP_001185704.1	0	0	0	1		-4.883	FALSE	FALSE	FALSE	FALSE	FALSE	FALSE	FALSE	FALSE	FALSE	FALSE
PIAS1	NP_057250.1	0	0	0	1	-3.8095	-4.768	FALSE	FALSE	FALSE	FALSE	FALSE	FALSE	FALSE	FALSE	FALSE	FALSE
PIAS4	NP_056981.2	0	0	1	0	-3.8475	-5.182	FALSE	FALSE	FALSE	FALSE	FALSE	FALSE	FALSE	FALSE	FALSE	FALSE
PIK3C3	NP_002638.2	0	0	1	2	-3.8295	-5.25	FALSE	FALSE	FALSE	FALSE	FALSE	FALSE	FALSE	FALSE	FALSE	FALSE
PIK3R1	NP_852664.1	0	0	0	1	-4.7745	-4.935	TRUE	FALSE	TRUE	FALSE	FALSE	FALSE	TRUE	TRUE	TRUE	TRUE
PIK3R5	NP_001136105.1	0	0	0	1	-3.8615	-4.7905	FALSE	FALSE	FALSE	FALSE	FALSE	FALSE	FALSE	FALSE	FALSE	FALSE
PIP4K2A	NP_005019.2	0	0	0	2		-4.6865	FALSE	FALSE	FALSE	FALSE	FALSE	FALSE	FALSE	FALSE	FALSE	FALSE
PITPNA	NP_006215.1	0	0	0	1		-4.6455	FALSE	FALSE	FALSE	FALSE	FALSE	FALSE	FALSE	FALSE	FALSE	FALSE
PITPNM3	NP_112497.2	0	0	2	0	-3.6765	-5.1875	FALSE	FALSE	FALSE	FALSE	FALSE	FALSE	FALSE	FALSE	FALSE	FALSE
PJA1	NP_660095.1	0	0	0	1		-4.703	FALSE	FALSE	FALSE	FALSE	FALSE	FALSE	FALSE	FALSE	FALSE	FALSE
PKD2	NP_000288.1	0	0	0	1	-4.3375	-5.0175	FALSE	FALSE	FALSE	FALSE	FALSE	FALSE	FALSE	FALSE	FALSE	FALSE
PKN1	NP_002732.3	0	0	0	1	-3.514	-4.8085	FALSE	FALSE	FALSE	FALSE	FALSE	FALSE	FALSE	FALSE	FALSE	FALSE
PKN2	NP_006247.1	0	0	0	2	-4.319	-4.9805	FALSE	FALSE	FALSE	FALSE	FALSE	FALSE	FALSE	FALSE	FALSE	FALSE
PLCB1	NP_056007.1	0	0	1	2	-5.41	-5.3415	FALSE	TRUE	TRUE	FALSE	FALSE	FALSE	TRUE	FALSE	FALSE	TRUE
PLCG1	NP_002651.2	0	0	0	1	-4.1645	-4.7635	FALSE	FALSE	FALSE	FALSE	FALSE	FALSE	FALSE	FALSE	FALSE	FALSE
PLCL2	NP_055999.2	0	0	1	0	-3.511	-5.0935	FALSE	FALSE	FALSE	FALSE	FALSE	FALSE	FALSE	FALSE	FALSE	FALSE
PLCXD3	NP_001005473.1	0	0	0	1		-4.6875	FALSE	FALSE	FALSE	FALSE	FALSE	FALSE	FALSE	FALSE	FALSE	FALSE
PLIN3	NP_005808.3	0	0	0	3		-4.624	FALSE	FALSE	FALSE	FALSE	FALSE	FALSE	FALSE	FALSE	FALSE	FALSE
PLK2	NP_006613.2	0	0	0	1	-3.3525	-4.6785	FALSE	FALSE	FALSE	FALSE	FALSE	FALSE	FALSE	FALSE	FALSE	FALSE
PLPPR1	NP_997182.1	0	0	0	1	-3.3685	-4.845	FALSE	FALSE	FALSE	FALSE	FALSE	FALSE	FALSE	FALSE	FALSE	FALSE
PLSCR1	NP_066928.1	0	0	0	1		-4.7645	FALSE	FALSE	FALSE	FALSE	FALSE	FALSE	FALSE	FALSE	FALSE	FALSE
PLXNA4	NP_065962.1	0	0	1	2	-4.0855	-5.354	FALSE	FALSE	FALSE	FALSE	FALSE	FALSE	FALSE	FALSE	FALSE	FALSE
PLXNB2	NP_036533.2	0	0	0	2	-3.641	-4.664	FALSE	FALSE	FALSE	FALSE	FALSE	FALSE	FALSE	FALSE	FALSE	FALSE
PLXNC1	NP_005752.1	0	0	0	1	-3.8725	-4.6945	FALSE	FALSE	FALSE	FALSE	FALSE	FALSE	FALSE	FALSE	FALSE	FALSE
PML	NP_150241.2	0	0	0	1	-4.017	-4.9205	FALSE	FALSE	FALSE	FALSE	FALSE	FALSE	FALSE	FALSE	FALSE	FALSE
PNMA5	NP_001096620.1	0	0	0	2	-3.094	-4.795	FALSE	FALSE	FALSE	FALSE	FALSE	TRUE	FALSE	FALSE	FALSE	FALSE
POC5	NP_001092741.1	0	0	0	1	-3.546	-4.6385	FALSE	FALSE	FALSE	FALSE	FALSE	FALSE	FALSE	FALSE	FALSE	FALSE
POLR1B	NP_001269701.1	0	0	0	2		-5.0535	FALSE	FALSE	FALSE	FALSE	FALSE	FALSE	FALSE	FALSE	FALSE	FALSE
POLR2A	NP_000928.1	0	0	0	1	-4.496	-4.706	FALSE	FALSE	FALSE	FALSE	FALSE	TRUE	TRUE	FALSE	FALSE	TRUE
POLR2B	NP_000929.1	0	0	0	4	-4.5115	-4.8515	FALSE	FALSE	FALSE	FALSE	FALSE	FALSE	FALSE	FALSE	FALSE	FALSE
POLR3B	NP_060552.4	0	0	0	1	-4.3925	-4.7085	TRUE	FALSE	TRUE	FALSE	FALSE	FALSE	TRUE	FALSE	FALSE	TRUE
PORCN	NP_982301.1	0	0	1	0	-5.1275	-5.694	FALSE	TRUE	TRUE	FALSE	FALSE	FALSE	TRUE	FALSE	FALSE	TRUE
POU3F1	NP_002690.3	0	0	0	1		-4.6765	FALSE	FALSE	FALSE	FALSE	FALSE	FALSE	FALSE	FALSE	FALSE	FALSE
POU3F2	NP_005595.2	0	0	0	3	-3.301	-4.7955	FALSE	FALSE	FALSE	FALSE	FALSE	FALSE	FALSE	FALSE	FALSE	FALSE
POU3F4	NP_000298.3	0	0	1	3		-5.2055	FALSE	FALSE	FALSE	FALSE	FALSE	FALSE	FALSE	FALSE	FALSE	FALSE
PPAT	NP_002694.3	0	0	1	0	-3.8275	-5.139	FALSE	FALSE	FALSE	FALSE	FALSE	FALSE	FALSE	FALSE	FALSE	FALSE
PPFIBP1	NP_803193.3	0	0	0	1	-3.573	-4.845	FALSE	FALSE	FALSE	FALSE	FALSE	FALSE	TRUE	FALSE	FALSE	TRUE
PPIG	NP_004783.2	0	0	0	1	-4.5525	-4.7105	FALSE	FALSE	FALSE	FALSE	FALSE	FALSE	FALSE	FALSE	FALSE	FALSE
PPIP5K2	NP_001263206.1	0	0	0	3	-4.0015	-4.885	FALSE	FALSE	FALSE	FALSE	FALSE	FALSE	FALSE	FALSE	FALSE	FALSE
PPM1A	NP_808820.1	0	0	1	0		-5.3335	FALSE	FALSE	FALSE	FALSE	FALSE	FALSE	FALSE	FALSE	FALSE	FALSE
PPME1	NP_001258522.1	0	0	0	5	-4.9275	-4.8375	FALSE	FALSE	FALSE	FALSE	FALSE	FALSE	FALSE	FALSE	FALSE	FALSE
PPP1CA	NP_001008709.1	0	0	0	1	-4.1915	-4.811	FALSE	FALSE	FALSE	FALSE	FALSE	FALSE	FALSE	FALSE	FALSE	FALSE
PPP2CB	NP_001009552.1	0	0	0	1		-5.0505	FALSE	FALSE	FALSE	FALSE	FALSE	FALSE	FALSE	FALSE	FALSE	FALSE
PPP2R2A	NP_001171062.1	0	0	0	3	-5.1475	-5.004	FALSE	TRUE	TRUE	FALSE	FALSE	FALSE	FALSE	FALSE	FALSE	FALSE
PPP2R2C	NP_001193923.1	0	0	1	0	-3.6905	-5.3085	FALSE	FALSE	FALSE	FALSE	FALSE	FALSE	FALSE	FALSE	FALSE	FALSE
PPP3CB	NP_001135825.1	0	0	3	0	-5.36	-6.028	FALSE	TRUE	TRUE	FALSE	FALSE	FALSE	FALSE	FALSE	FALSE	FALSE
PPP4R3A	NP_001271209.1	0	0	2	0	-3.2655	-5.8815	FALSE	FALSE	FALSE	FALSE	FALSE	FALSE	FALSE	FALSE	FALSE	FALSE
PPP5C	NP_006238.1	0	0	0	3	-2.6765	-4.756	FALSE	FALSE	FALSE	FALSE	FALSE	FALSE	FALSE	FALSE	FALSE	FALSE
PPP6C	NP_001116827.1	0	0	0	1	-3.146	-4.768	FALSE	FALSE	FALSE	FALSE	FALSE	FALSE	FALSE	FALSE	FALSE	FALSE
PPP6R1	NP_055746.3	0	0	0	1	-2.9025	-4.6525	FALSE	FALSE	FALSE	FALSE	FALSE	FALSE	FALSE	FALSE	FALSE	FALSE
PPTC7	NP_644812.1	0	0	0	2		-5.019	FALSE	FALSE	FALSE	FALSE	FALSE	FALSE	FALSE	FALSE	FALSE	FALSE
PRC1	NP_001254509.2	0	0	0	2	-3.143	-4.745	FALSE	FALSE	FALSE	FALSE	FALSE	FALSE	FALSE	FALSE	FALSE	FALSE
PRDM9	NP_064612.2	0	0	0	1		-4.796	FALSE	FALSE	FALSE	FALSE	FALSE	FALSE	FALSE	FALSE	FALSE	FALSE
PREP	NP_002717.3	0	0	0	3	-3.74	-4.821	FALSE	FALSE	FALSE	FALSE	FALSE	FALSE	FALSE	FALSE	FALSE	FALSE
PRG4	NP_005798.3	0	0	0	1	-5.402	-4.9975	FALSE	TRUE	TRUE	FALSE	FALSE	FALSE	FALSE	FALSE	FALSE	FALSE
PRIM1	NP_000937.1	0	0	0	1	-3.2265	-4.8395	FALSE	FALSE	FALSE	FALSE	FALSE	FALSE	TRUE	FALSE	FALSE	TRUE
PRKACB	NP_891993.1	0	0	0	2	-3.597	-4.955	FALSE	FALSE	FALSE	FALSE	FALSE	FALSE	TRUE	FALSE	FALSE	TRUE
PRKAG1	NP_001193638.1	0	0	0	2	-4.0135	-4.778	FALSE	FALSE	FALSE	FALSE	FALSE	FALSE	FALSE	FALSE	FALSE	FALSE
PRKAG2	NP_057287.2	0	0	0	1	-4.0165	-4.9545	FALSE	FALSE	FALSE	FALSE	FALSE	FALSE	FALSE	FALSE	FALSE	FALSE
PRKCI	NP_002731.4	0	0	1	0		-5.1225	FALSE	FALSE	FALSE	FALSE	FALSE	FALSE	FALSE	FALSE	FALSE	FALSE
PRKRA	NP_003681.1	0	0	0	1		-5.0485	FALSE	FALSE	FALSE	FALSE	FALSE	FALSE	FALSE	FALSE	FALSE	FALSE
PRMT8	NP_062828.3	0	0	2	0	-3.606	-5.108	FALSE	FALSE	FALSE	FALSE	FALSE	FALSE	FALSE	FALSE	FALSE	FALSE
PROX1	NP_001257545.1	0	0	0	2	-4.4395	-4.882	FALSE	FALSE	FALSE	FALSE	FALSE	FALSE	FALSE	FALSE	FALSE	FALSE
PRPF18	NP_003666.1	0	0	0	2	-4.546	-4.8065	FALSE	FALSE	FALSE	FALSE	FALSE	FALSE	FALSE	FALSE	FALSE	FALSE
PRPF38A	NP_116253.2	0	0	0	1	-3.203	-4.7185	FALSE	FALSE	FALSE	FALSE	FALSE	FALSE	FALSE	FALSE	FALSE	FALSE
PRPF38B	NP_060531.2	0	0	0	1		-4.905	FALSE	FALSE	FALSE	FALSE	FALSE	FALSE	FALSE	FALSE	FALSE	FALSE
PRPF39	NP_060392.3	0	0	1	0	-3.9005	-5.078	FALSE	FALSE	FALSE	FALSE	FALSE	FALSE	FALSE	FALSE	FALSE	FALSE
PRPF40A	NP_060362.3	0	0	0	1	-4.441	-4.7545	FALSE	FALSE	FALSE	FALSE	FALSE	FALSE	FALSE	FALSE	FALSE	FALSE
PRPF4B	NP_003904.3	0	0	0	1		-4.6595	FALSE	FALSE	FALSE	FALSE	FALSE	FALSE	FALSE	FALSE	FALSE	FALSE
PRPF6	NP_036601.2	0	0	0	1	-4.468	-5.0205	FALSE	FALSE	FALSE	FALSE	FALSE	FALSE	FALSE	FALSE	FALSE	FALSE
PRPS1L1	NP_787082.1	0	0	2	0		-5.086	FALSE	FALSE	FALSE	FALSE	FALSE	FALSE	FALSE	FALSE	FALSE	FALSE
PRPSAP2	NP_001230870.1	0	0	0	1		-4.6485	FALSE	FALSE	FALSE	FALSE	FALSE	FALSE	FALSE	FALSE	FALSE	FALSE
PRR12	NP_065770.1	0	0	0	1	-4.565	-4.619	FALSE	FALSE	FALSE	FALSE	FALSE	FALSE	TRUE	TRUE	FALSE	TRUE
PSMA3	NP_002779.1	0	0	0	1	-4.362	-4.8875	FALSE	FALSE	FALSE	FALSE	FALSE	FALSE	FALSE	FALSE	FALSE	FALSE
PSMA4	NP_001096137.1	0	0	0	1		-4.6325	FALSE	FALSE	FALSE	FALSE	FALSE	FALSE	FALSE	FALSE	FALSE	FALSE
PSMC6	NP_002797.4	0	0	0	1	-3.016	-4.7175	FALSE	FALSE	FALSE	FALSE	FALSE	FALSE	FALSE	FALSE	FALSE	FALSE
PSMD1	NP_002798.2	0	0	1	0	-4.7355	-5.72	FALSE	FALSE	FALSE	FALSE	FALSE	FALSE	FALSE	FALSE	FALSE	FALSE
PSME3	NP_789839.1	0	0	0	2		-4.699	FALSE	FALSE	FALSE	FALSE	FALSE	FALSE	FALSE	FALSE	FALSE	FALSE
PTAR1	NP_001093136.1	0	0	0	1		-4.8145	FALSE	FALSE	FALSE	FALSE	FALSE	FALSE	FALSE	FALSE	FALSE	FALSE
PTBP2	NP_001287916.1	0	0	1	0	-3.5355	-5.519	FALSE	FALSE	FALSE	FALSE	FALSE	FALSE	FALSE	FALSE	FALSE	FALSE
PTCHD1	NP_775766.2	0	0	2	2		-6.0235	FALSE	FALSE	FALSE	FALSE	FALSE	FALSE	TRUE	FALSE	FALSE	TRUE
PTGER3	NP_942011.1	0	0	0	1		-4.686	FALSE	FALSE	FALSE	FALSE	FALSE	FALSE	FALSE	FALSE	FALSE	FALSE
PTK2	NP_001339627.1	0	0	3	5	-4.58	-5.976	FALSE	FALSE	FALSE	FALSE	FALSE	FALSE	FALSE	FALSE	FALSE	FALSE
PTP4A1	NP_003454.1	0	0	0	1		-4.703	FALSE	FALSE	FALSE	FALSE	FALSE	FALSE	FALSE	FALSE	FALSE	FALSE
PTPRK	NP_001129120.1	0	0	0	2	-3.71	-4.678	FALSE	FALSE	FALSE	FALSE	FALSE	FALSE	FALSE	FALSE	FALSE	FALSE
PTPRN	NP_002837.1	0	0	0	1	-4.1145	-4.6705	FALSE	FALSE	FALSE	FALSE	FALSE	FALSE	FALSE	FALSE	FALSE	FALSE
PTPRS	NP_002841.3	0	0	0	1	-5.232	-4.955	FALSE	TRUE	FALSE	FALSE	FALSE	TRUE	FALSE	FALSE	FALSE	FALSE
PTPRT	NP_573400.3	0	0	0	9	-4.048	-4.893	FALSE	FALSE	FALSE	FALSE	FALSE	FALSE	FALSE	FALSE	FALSE	FALSE
PUM1	NP_001018494.1	0	0	0	1	-4.335	-4.8345	FALSE	FALSE	FALSE	FALSE	FALSE	FALSE	FALSE	FALSE	FALSE	TRUE
PUM2	NP_056132.1	0	0	0	1	-3.7225	-4.621	FALSE	FALSE	FALSE	FALSE	FALSE	FALSE	FALSE	FALSE	FALSE	FALSE
PWWP3B	NP_001164491.1	0	0	0	147	-3.848	-4.758	FALSE	FALSE	FALSE	FALSE	FALSE	FALSE	FALSE	FALSE	FALSE	FALSE
PXK	NP_060241.2	0	0	0	1		-4.7605	FALSE	FALSE	FALSE	FALSE	FALSE	FALSE	FALSE	FALSE	FALSE	FALSE
QKI	NP_006766.1	0	0	0	2	-5.2275	-4.843	FALSE	TRUE	TRUE	FALSE	FALSE	FALSE	TRUE	FALSE	FALSE	TRUE
QRSL1	NP_060762.3	0	0	0	1	-4.391	-4.8955	FALSE	FALSE	FALSE	FALSE	FALSE	FALSE	FALSE	FALSE	FALSE	FALSE
QSER1	NP_001070254.2	0	0	0	1	-3.796	-4.6265	FALSE	FALSE	FALSE	FALSE	FALSE	FALSE	FALSE	FALSE	FALSE	FALSE
R3HDM2	NP_001317050.1	0	0	0	1		-4.693	FALSE	FALSE	FALSE	FALSE	FALSE	FALSE	FALSE	FALSE	FALSE	FALSE
RAB21	NP_055814.1	0	0	0	1	-2.701	-4.7	FALSE	FALSE	FALSE	FALSE	FALSE	FALSE	FALSE	FALSE	FALSE	FALSE
RAB24	NP_001026847.1	0	0	0	1	-4.2805	-4.652	FALSE	FALSE	FALSE	FALSE	FALSE	FALSE	FALSE	FALSE	FALSE	FALSE
RAB2A	NP_002856.1	0	0	1	0	-4.71	-5.188	FALSE	FALSE	FALSE	FALSE	FALSE	FALSE	FALSE	FALSE	FALSE	FALSE
RAB30	NP_001272988.1	0	0	0	1	-3.196	-4.8505	FALSE	FALSE	FALSE	FALSE	FALSE	FALSE	FALSE	FALSE	FALSE	FALSE
RAB33A	NP_004785.1	0	0	0	2		-4.6805	FALSE	FALSE	FALSE	FALSE	FALSE	FALSE	FALSE	FALSE	FALSE	FALSE
RAB39B	NP_741995.1	0	0	0	1		-4.796	FALSE	FALSE	FALSE	FALSE	FALSE	FALSE	TRUE	FALSE	FALSE	TRUE
RAB5B	NP_001238965.1	0	0	0	1		-5.0425	FALSE	FALSE	FALSE	FALSE	FALSE	FALSE	FALSE	FALSE	FALSE	FALSE
RAB6B	NP_057661.3	0	0	1	0	-4.3205	-5.075	FALSE	FALSE	FALSE	FALSE	FALSE	FALSE	FALSE	FALSE	FALSE	FALSE
RABGAP1	NP_036329.3	0	0	0	3	-3.8605	-4.918	FALSE	FALSE	FALSE	FALSE	FALSE	FALSE	FALSE	FALSE	FALSE	FALSE
RACK1	NP_006089.1	0	0	1	2		-5.4925	FALSE	FALSE	FALSE	FALSE	FALSE	FALSE	FALSE	FALSE	FALSE	FALSE
RAD17	NP_579916.1	0	0	0	1		-4.8175	FALSE	FALSE	FALSE	FALSE	FALSE	FALSE	FALSE	FALSE	FALSE	FALSE
RAD51	NP_002866.2	0	0	0	2	-4.1295	-4.933	FALSE	FALSE	FALSE	FALSE	FALSE	FALSE	TRUE	FALSE	FALSE	TRUE
RAD54L2	NP_055921.2	0	0	0	1	-3.818	-4.629	FALSE	FALSE	FALSE	FALSE	FALSE	FALSE	FALSE	FALSE	FALSE	FALSE
RAE1	NP_001015885.1	0	0	0	1		-4.984	FALSE	FALSE	FALSE	FALSE	FALSE	FALSE	FALSE	FALSE	FALSE	FALSE
RAG1	NP_000439.2	0	0	0	1	-4.6835	-4.8035	FALSE	FALSE	FALSE	FALSE	FALSE	FALSE	FALSE	FALSE	FALSE	FALSE
RALA	NP_005393.2	0	0	3	0	-6.1565	-5.393	TRUE	TRUE	TRUE	FALSE	FALSE	FALSE	TRUE	FALSE	FALSE	TRUE
RALGAPA1	NP_055805.1	0	0	0	1	-4.043	-4.635	FALSE	FALSE	FALSE	FALSE	FALSE	FALSE	TRUE	FALSE	FALSE	TRUE
RALGPS1	NP_001177659.1	0	0	0	1	-5.0315	-4.7355	FALSE	FALSE	FALSE	FALSE	FALSE	FALSE	FALSE	FALSE	FALSE	FALSE
RANBP1	NP_001265568.1	0	0	0	3	-2.932	-4.836	FALSE	FALSE	FALSE	FALSE	FALSE	FALSE	FALSE	FALSE	FALSE	FALSE
RAP1GAP	NP_002876.2	0	0	0	1		-4.848	FALSE	FALSE	FALSE	FALSE	FALSE	FALSE	FALSE	FALSE	FALSE	FALSE
RAPGEF1	NP_005303.2	0	0	1	0	-3.339	-5.1785	FALSE	FALSE	FALSE	FALSE	FALSE	FALSE	FALSE	FALSE	FALSE	FALSE
RASA1	NP_002881.1	0	0	0	2	-4.407	-4.6995	FALSE	FALSE	FALSE	FALSE	FALSE	FALSE	TRUE	FALSE	FALSE	TRUE
RBBP5	NP_005048.2	0	0	0	2		-4.752	FALSE	FALSE	FALSE	FALSE	FALSE	FALSE	FALSE	FALSE	FALSE	FALSE
RBL2	NP_001310537.1	0	0	0	1	-4.0265	-4.632	FALSE	FALSE	FALSE	FALSE	FALSE	FALSE	FALSE	FALSE	FALSE	FALSE
RBM10	NP_005667.2	0	0	0	1		-4.6225	FALSE	FALSE	FALSE	FALSE	FALSE	FALSE	TRUE	FALSE	FALSE	TRUE
RBM12B	NP_976324.2	0	0	0	1	-3.768	-5.0045	FALSE	FALSE	FALSE	FALSE	FALSE	FALSE	FALSE	FALSE	FALSE	FALSE
RBM17	NP_001139019.1	0	0	0	1		-4.8785	FALSE	FALSE	FALSE	FALSE	FALSE	FALSE	FALSE	FALSE	FALSE	FALSE
RBM39	NP_001229529.1	0	0	1	0	-4.3575	-5.2345	FALSE	FALSE	FALSE	FALSE	FALSE	FALSE	FALSE	FALSE	FALSE	FALSE
RBM44	NP_001073973.3	0	0	0	9	-3.9825	-4.896	FALSE	FALSE	FALSE	FALSE	FALSE	FALSE	FALSE	FALSE	FALSE	FALSE
RBM5	NP_005769.1	0	0	0	1	-3.9095	-4.797	FALSE	FALSE	FALSE	FALSE	FALSE	FALSE	FALSE	FALSE	FALSE	FALSE
RBPJ	NP_005340.2	0	0	1	1	-5.01	-5.178	FALSE	FALSE	FALSE	FALSE	FALSE	FALSE	TRUE	FALSE	FALSE	TRUE
REXO5	NP_001138396.1	0	0	0	1	-3.6675	-4.7705	FALSE	FALSE	FALSE	FALSE	FALSE	FALSE	FALSE	FALSE	FALSE	FALSE
RFX3	NP_602304.1	0	0	0	2	-5.5465	-5.005	TRUE	TRUE	TRUE	FALSE	FALSE	FALSE	FALSE	FALSE	FALSE	FALSE
RFX4	NP_001193620.1	0	0	0	15	-3.3085	-4.7345	FALSE	FALSE	FALSE	FALSE	FALSE	FALSE	FALSE	FALSE	FALSE	FALSE
RGS10	NP_001005339.1	0	0	0	1		-4.622	FALSE	FALSE	FALSE	FALSE	FALSE	FALSE	FALSE	FALSE	FALSE	FALSE
RHAG	NP_000315.2	0	0	0	1		-4.739	FALSE	FALSE	FALSE	FALSE	FALSE	FALSE	FALSE	FALSE	FALSE	FALSE
RHOB	NP_004031.1	0	0	0	1	-4.64	-4.9145	FALSE	FALSE	FALSE	FALSE	FALSE	FALSE	FALSE	FALSE	FALSE	FALSE
RHOBTB1	NP_001229288.1	0	0	0	1	-3.7405	-4.6205	FALSE	FALSE	FALSE	FALSE	FALSE	FALSE	FALSE	FALSE	FALSE	FALSE
RHOF	NP_061907.2	0	0	0	1		-4.6765	FALSE	FALSE	FALSE	FALSE	FALSE	FALSE	FALSE	FALSE	FALSE	FALSE
RHOT1	NP_001028740.1	0	0	0	2		-4.9365	FALSE	FALSE	FALSE	FALSE	FALSE	FALSE	FALSE	FALSE	FALSE	FALSE
RING1	NP_002922.2	0	0	0	1	-4.7655	-4.7155	FALSE	FALSE	FALSE	FALSE	FALSE	FALSE	FALSE	FALSE	FALSE	FALSE
RLIM	NP_899196.1	0	0	3	0		-5.1395	FALSE	FALSE	FALSE	FALSE	FALSE	FALSE	TRUE	FALSE	FALSE	TRUE
RNF113A	NP_008909.1	0	0	1	0	-5.628	-5.151	FALSE	TRUE	TRUE	FALSE	FALSE	FALSE	TRUE	FALSE	FALSE	TRUE
RNF145	NP_001186309.1	0	0	0	1	-3.7805	-5.042	FALSE	FALSE	FALSE	FALSE	FALSE	FALSE	FALSE	FALSE	FALSE	FALSE
RNF17	NP_112567.2	0	0	0	3	-3.2005	-4.854	FALSE	FALSE	FALSE	FALSE	FALSE	FALSE	FALSE	FALSE	FALSE	FALSE
RNF2	NP_009143.1	0	0	1	0		-5.6655	FALSE	FALSE	FALSE	FALSE	FALSE	FALSE	FALSE	FALSE	FALSE	FALSE
RNF7	NP_001188299.1	0	0	0	1		-4.9765	FALSE	FALSE	FALSE	FALSE	FALSE	FALSE	FALSE	FALSE	FALSE	FALSE
RNF8	NP_003949.1	0	0	0	1	-4.5705	-4.6575	FALSE	FALSE	FALSE	FALSE	FALSE	FALSE	FALSE	FALSE	FALSE	FALSE
RNGTT	NP_003791.3	0	0	0	3	-3.731	-4.8065	FALSE	FALSE	FALSE	FALSE	FALSE	FALSE	FALSE	FALSE	FALSE	FALSE
ROCK2	NP_004841.2	0	0	1	1	-4.292	-5.0825	FALSE	FALSE	FALSE	FALSE	FALSE	FALSE	FALSE	FALSE	FALSE	FALSE
RORA	NP_599023.1	0	0	0	1	-4.7395	-4.6675	FALSE	FALSE	FALSE	FALSE	FALSE	FALSE	TRUE	FALSE	FALSE	TRUE
RORC	NP_005051.2	0	0	0	1	-3.2725	-4.7885	FALSE	FALSE	FALSE	FALSE	FALSE	FALSE	FALSE	FALSE	FALSE	FALSE
RPAP1	NP_056355.2	0	0	0	1	-3.488	-4.6415	FALSE	FALSE	FALSE	FALSE	FALSE	FALSE	FALSE	FALSE	FALSE	FALSE
RPL10L	NP_542784.1	0	0	0	2	-2.7285	-4.763	FALSE	FALSE	FALSE	FALSE	FALSE	FALSE	FALSE	FALSE	FALSE	FALSE
RPL27A	NP_000981.1	0	0	0	1		-4.661	FALSE	FALSE	FALSE	FALSE	FALSE	FALSE	FALSE	FALSE	FALSE	FALSE
RPL32	NP_000985.1	0	0	2	0	-2.206	-5.4205	FALSE	FALSE	FALSE	FALSE	FALSE	FALSE	FALSE	FALSE	FALSE	FALSE
RPL41	NP_001030344.1	0	0	0	1		-4.948	FALSE	FALSE	FALSE	FALSE	FALSE	FALSE	FALSE	FALSE	FALSE	FALSE
RPL8	NP_000964.1	0	0	1	0	-2.933	-5.537	FALSE	FALSE	FALSE	FALSE	FALSE	FALSE	FALSE	FALSE	FALSE	FALSE
RPP25	NP_060263.2	0	0	0	2		-4.9495	FALSE	FALSE	FALSE	FALSE	FALSE	FALSE	FALSE	FALSE	FALSE	FALSE
RPRD1A	NP_060640.2	0	0	1	0	-3.8645	-5.089	FALSE	FALSE	FALSE	FALSE	FALSE	FALSE	FALSE	FALSE	FALSE	FALSE
RPS3	NP_000996.2	0	0	1	0		-5.2655	FALSE	FALSE	FALSE	FALSE	FALSE	FALSE	FALSE	FALSE	FALSE	FALSE
RPS6KA4	NP_003933.1	0	0	0	1	-3.381	-4.6555	FALSE	FALSE	FALSE	FALSE	FALSE	FALSE	FALSE	FALSE	FALSE	FALSE
RPTN	NP_001116437.1	0	0	60	0	-3.04	-5.194	FALSE	FALSE	FALSE	FALSE	FALSE	FALSE	FALSE	FALSE	FALSE	FALSE
RRAGC	NP_071440.1	0	0	0	1	-4.5165	-4.9905	FALSE	FALSE	FALSE	FALSE	FALSE	FALSE	FALSE	FALSE	FALSE	FALSE
RRM1	NP_001024.1	0	0	0	1	-3.7505	-4.905	FALSE	FALSE	FALSE	FALSE	FALSE	FALSE	FALSE	FALSE	FALSE	FALSE
RRM2	NP_001159403.1	0	0	1	1		-5.257	FALSE	FALSE	FALSE	FALSE	FALSE	FALSE	FALSE	FALSE	FALSE	FALSE
RRP9	NP_004695.1	0	0	0	1	-3.251	-4.715	FALSE	FALSE	FALSE	FALSE	FALSE	FALSE	FALSE	FALSE	FALSE	FALSE
RSBN1L	NP_940869.2	0	0	1	0		-5.12	FALSE	FALSE	FALSE	FALSE	FALSE	FALSE	FALSE	FALSE	FALSE	FALSE
RSRC2	NP_075388.2	0	0	1	0		-5.6985	FALSE	FALSE	FALSE	FALSE	FALSE	FALSE	FALSE	FALSE	FALSE	FALSE
RSU1	NP_036557.1	0	0	0	1	-3.226	-4.6835	FALSE	FALSE	FALSE	FALSE	FALSE	FALSE	FALSE	FALSE	FALSE	FALSE
RTCA	NP_001124313.1	0	0	0	5		-4.725	FALSE	FALSE	FALSE	FALSE	FALSE	FALSE	FALSE	FALSE	FALSE	FALSE
RTL9	NP_065820.1	0	0	0	1	-3.6175	-4.853	FALSE	FALSE	FALSE	FALSE	FALSE	FALSE	FALSE	FALSE	FALSE	FALSE
RTN4R	NP_075380.1	0	0	0	1	-2.7885	-4.881	FALSE	FALSE	FALSE	FALSE	FALSE	FALSE	FALSE	FALSE	FALSE	FALSE
RUNX3	NP_001026850.1	0	0	0	1	-3.5535	-4.7285	FALSE	FALSE	FALSE	FALSE	FALSE	FALSE	FALSE	FALSE	FALSE	FALSE
RUVBL1	NP_003698.1	0	0	0	1		-4.7205	FALSE	FALSE	FALSE	FALSE	FALSE	FALSE	FALSE	FALSE	FALSE	FALSE
SAMD4B	NP_060498.2	0	0	0	1	-4.521	-4.8995	FALSE	FALSE	FALSE	FALSE	FALSE	FALSE	FALSE	FALSE	FALSE	FALSE
SAR1A	NP_001136120.1	0	0	0	4		-4.685	FALSE	FALSE	FALSE	FALSE	FALSE	FALSE	FALSE	FALSE	FALSE	FALSE
SCAF4	NP_065757.1	0	0	0	1	-4.3565	-4.6465	FALSE	FALSE	FALSE	FALSE	FALSE	FALSE	TRUE	FALSE	FALSE	TRUE
SCAMP1	NP_004857.4	0	0	0	1	-4.5145	-4.7985	FALSE	FALSE	FALSE	FALSE	FALSE	FALSE	FALSE	FALSE	FALSE	FALSE
SCARB2	NP_005497.1	0	0	0	1	-3.4915	-4.6265	FALSE	FALSE	FALSE	FALSE	FALSE	FALSE	FALSE	FALSE	FALSE	FALSE
SCD	NP_005054.3	0	0	0	1		-4.688	FALSE	FALSE	FALSE	FALSE	FALSE	FALSE	FALSE	FALSE	FALSE	FALSE
SCFD1	NP_057190.2	0	0	0	1		-4.644	FALSE	FALSE	FALSE	FALSE	FALSE	FALSE	FALSE	FALSE	FALSE	FALSE
SCN5A	NP_932173.1	0	0	0	1	-5.122	-4.638	FALSE	FALSE	FALSE	FALSE	FALSE	FALSE	FALSE	FALSE	FALSE	FALSE
SCUBE3	NP_689966.2	0	0	0	1	-4.6505	-4.7105	FALSE	FALSE	FALSE	FALSE	FALSE	FALSE	TRUE	FALSE	FALSE	TRUE
SCYL2	NP_001317182.1	0	0	0	1		-4.927	FALSE	FALSE	FALSE	FALSE	FALSE	FALSE	FALSE	FALSE	FALSE	FALSE
SDCBP	NP_001007068.1	0	0	0	1	-4.2065	-4.649	FALSE	FALSE	FALSE	FALSE	FALSE	FALSE	FALSE	FALSE	FALSE	FALSE
SEC11C	NP_150596.1	0	0	0	1		-4.916	FALSE	FALSE	FALSE	FALSE	FALSE	FALSE	FALSE	FALSE	FALSE	FALSE
SEC24B	NP_006314.2	0	0	0	1		-4.66	FALSE	FALSE	FALSE	FALSE	FALSE	FALSE	FALSE	FALSE	FALSE	FALSE
SEC61A2	NP_001136099.1	0	0	0	1	-3.2395	-4.813	FALSE	FALSE	FALSE	FALSE	FALSE	FALSE	FALSE	FALSE	FALSE	FALSE
SENP2	NP_067640.2	0	0	0	1	-3.3715	-4.831	FALSE	FALSE	FALSE	FALSE	FALSE	FALSE	FALSE	FALSE	FALSE	FALSE
SENP5	NP_689912.2	0	0	1	0	-3.269	-5.1415	FALSE	FALSE	FALSE	FALSE	FALSE	FALSE	FALSE	FALSE	FALSE	FALSE
SEPHS1	NP_036379.2	0	0	0	1	-3.995	-4.8875	FALSE	FALSE	FALSE	FALSE	FALSE	FALSE	FALSE	FALSE	FALSE	FALSE
SEPTIN11	NP_001293076.1	0	0	0	1	-4.456	-4.895	FALSE	FALSE	FALSE	FALSE	FALSE	FALSE	FALSE	FALSE	FALSE	FALSE
SEPTIN3	NP_663786.2	0	0	0	2	-3.525	-4.686	FALSE	FALSE	FALSE	FALSE	FALSE	FALSE	FALSE	FALSE	FALSE	FALSE
SERAC1	NP_116250.3	0	0	0	1	-3.7205	-4.722	FALSE	FALSE	FALSE	FALSE	FALSE	FALSE	TRUE	FALSE	FALSE	TRUE
SERPINA6	NP_001747.3	0	0	0	1	-3.267	-4.753	FALSE	FALSE	FALSE	FALSE	FALSE	FALSE	FALSE	FALSE	FALSE	FALSE
SERPINA7	NP_000345.2	0	0	0	2	-4.0855	-4.705	FALSE	FALSE	FALSE	FALSE	FALSE	FALSE	FALSE	FALSE	FALSE	FALSE
SERPINE2	NP_006207.1	0	0	0	1	-3.3205	-4.685	FALSE	FALSE	FALSE	FALSE	FALSE	FALSE	FALSE	FALSE	FALSE	FALSE
SERPINI1	NP_005016.1	0	0	0	1		-4.7705	FALSE	FALSE	FALSE	FALSE	FALSE	FALSE	FALSE	FALSE	FALSE	FALSE
SESN3	NP_653266.2	0	0	0	1	-4.0655	-4.667	FALSE	FALSE	FALSE	FALSE	FALSE	FALSE	FALSE	FALSE	FALSE	FALSE
SESTD1	NP_835224.3	0	0	0	2	-3.72	-4.876	FALSE	FALSE	FALSE	FALSE	FALSE	FALSE	FALSE	FALSE	FALSE	FALSE
SF3A1	NP_005868.1	0	0	2	0	-4.6845	-5.3065	FALSE	FALSE	FALSE	FALSE	FALSE	FALSE	FALSE	FALSE	FALSE	FALSE
SF3A3	NP_006793.1	0	0	0	1	-4.583	-4.83	FALSE	FALSE	FALSE	FALSE	FALSE	FALSE	FALSE	FALSE	FALSE	FALSE
SF3B3	NP_036558.3	0	0	0	1	-4.91	-4.9575	FALSE	FALSE	FALSE	FALSE	FALSE	FALSE	FALSE	FALSE	FALSE	FALSE
SF3B4	NP_005841.1	0	0	1	0		-5.1555	FALSE	FALSE	FALSE	FALSE	FALSE	FALSE	TRUE	FALSE	FALSE	TRUE
SFTPB	NP_000533.4	0	0	0	1	-3.1225	-4.871	FALSE	FALSE	FALSE	FALSE	FALSE	FALSE	FALSE	FALSE	FALSE	FALSE
SGK1	NP_005618.2	0	0	0	1		-4.651	FALSE	FALSE	FALSE	FALSE	FALSE	FALSE	FALSE	FALSE	FALSE	FALSE
SGK3	NP_001028750.1	0	0	1	1		-5.179	FALSE	FALSE	FALSE	FALSE	FALSE	FALSE	FALSE	FALSE	FALSE	FALSE
SH3BP5L	NP_085148.1	0	0	0	1	-3.302	-4.746	FALSE	FALSE	FALSE	FALSE	FALSE	FALSE	FALSE	FALSE	FALSE	FALSE
SH3GLB1	NP_001193580.1	0	0	0	1	-3.373	-4.8535	FALSE	FALSE	FALSE	FALSE	FALSE	FALSE	FALSE	FALSE	FALSE	FALSE
SHH	NP_000184.1	0	0	0	1	-5.104	-4.736	TRUE	TRUE	TRUE	FALSE	FALSE	FALSE	TRUE	FALSE	FALSE	TRUE
SHOC1	NP_001365140.1	0	0	0	1	-2.5355	-4.7395	FALSE	FALSE	FALSE	FALSE	FALSE	FALSE	FALSE	FALSE	FALSE	FALSE
SHOC2	NP_031399.2	0	0	0	3	-3.6775	-5.0065	FALSE	FALSE	FALSE	FALSE	FALSE	FALSE	TRUE	TRUE	TRUE	TRUE
SIDT2	NP_001035545.1	0	0	0	1	-3.1285	-4.9045	FALSE	FALSE	FALSE	FALSE	FALSE	FALSE	FALSE	FALSE	FALSE	FALSE
SIGLEC9	NP_001185487.1	0	0	0	3		-4.9775	FALSE	FALSE	FALSE	FALSE	FALSE	FALSE	FALSE	FALSE	FALSE	FALSE
SLAMF6	NP_001171645.1	0	0	1	0	-3.3265	-5.819	FALSE	FALSE	FALSE	FALSE	FALSE	FALSE	FALSE	FALSE	FALSE	FALSE
SLC12A2	NP_001037.1	0	0	0	2	-4.606	-4.7655	FALSE	FALSE	FALSE	FALSE	FALSE	FALSE	FALSE	FALSE	FALSE	FALSE
SLC12A3	NP_001119580.2	0	0	0	5	-3.8925	-4.903	FALSE	FALSE	FALSE	FALSE	FALSE	FALSE	FALSE	FALSE	FALSE	FALSE
SLC13A5	NP_808218.1	0	0	0	8		-4.8325	FALSE	FALSE	FALSE	FALSE	FALSE	FALSE	TRUE	FALSE	FALSE	TRUE
SLC16A1	NP_003042.3	0	0	1	0		-5.237	FALSE	FALSE	FALSE	FALSE	FALSE	FALSE	FALSE	FALSE	FALSE	TRUE
SLC16A10	NP_061063.2	0	0	0	1		-4.6175	FALSE	FALSE	FALSE	FALSE	FALSE	FALSE	FALSE	FALSE	FALSE	FALSE
SLC16A6	NP_001167637.1	0	0	0	1		-4.728	FALSE	FALSE	FALSE	FALSE	FALSE	FALSE	FALSE	FALSE	FALSE	FALSE
SLC17A6	NP_065079.1	0	0	2	0	-4.4955	-5.1265	FALSE	FALSE	FALSE	FALSE	FALSE	FALSE	FALSE	FALSE	FALSE	FALSE
SLC18A2	NP_003045.2	0	0	0	3		-4.9485	FALSE	FALSE	FALSE	FALSE	FALSE	FALSE	FALSE	FALSE	FALSE	FALSE
SLC19A2	NP_008927.1	0	0	0	1	-4.7585	-4.8965	FALSE	FALSE	FALSE	FALSE	FALSE	FALSE	FALSE	FALSE	FALSE	FALSE
SLC20A2	NP_006740.1	0	0	0	1	-4.064	-4.6645	FALSE	FALSE	FALSE	FALSE	FALSE	FALSE	FALSE	FALSE	FALSE	TRUE
SLC22A12	NP_653186.2	0	0	0	1	-3.587	-4.849	FALSE	FALSE	FALSE	FALSE	FALSE	FALSE	FALSE	FALSE	FALSE	FALSE
SLC22A3	NP_068812.1	0	0	0	3		-4.7415	FALSE	FALSE	FALSE	FALSE	FALSE	FALSE	FALSE	FALSE	FALSE	FALSE
SLC25A25	NP_001252543.1	0	0	0	7		-4.824	FALSE	FALSE	FALSE	FALSE	FALSE	FALSE	FALSE	FALSE	FALSE	FALSE
SLC25A3	NP_005879.1	0	0	0	1		-4.8515	FALSE	FALSE	FALSE	FALSE	FALSE	FALSE	FALSE	FALSE	FALSE	FALSE
SLC25A36	NP_060625.2	0	0	0	1		-4.8955	FALSE	FALSE	FALSE	FALSE	FALSE	FALSE	FALSE	FALSE	FALSE	FALSE
SLC26A2	NP_000103.2	0	0	0	1	-2.9005	-4.7785	FALSE	FALSE	FALSE	FALSE	FALSE	FALSE	TRUE	FALSE	FALSE	TRUE
SLC26A9	NP_443166.1	0	0	0	3	-3.868	-4.816	FALSE	FALSE	FALSE	FALSE	FALSE	FALSE	FALSE	FALSE	FALSE	FALSE
SLC2A12	NP_660159.1	0	0	0	1	-3.897	-4.631	FALSE	FALSE	FALSE	FALSE	FALSE	FALSE	FALSE	FALSE	FALSE	FALSE
SLC2A13	NP_443117.3	0	0	0	1		-4.6525	FALSE	FALSE	FALSE	FALSE	FALSE	FALSE	FALSE	FALSE	FALSE	FALSE
SLC2A3	NP_008862.1	0	0	0	1	-4.153	-4.631	FALSE	FALSE	FALSE	FALSE	FALSE	FALSE	FALSE	FALSE	FALSE	FALSE
SLC30A10	NP_061183.2	0	0	0	1	-4.6795	-4.742	FALSE	FALSE	FALSE	FALSE	FALSE	FALSE	FALSE	FALSE	FALSE	FALSE
SLC30A4	NP_037441.2	0	0	0	1		-4.9725	FALSE	FALSE	FALSE	FALSE	FALSE	FALSE	FALSE	FALSE	FALSE	FALSE
SLC30A5	NP_075053.2	0	0	0	1		-4.695	FALSE	FALSE	FALSE	FALSE	FALSE	FALSE	FALSE	FALSE	FALSE	FALSE
SLC32A1	NP_542119.1	0	0	1	0	-3.8875	-5.1015	FALSE	FALSE	FALSE	FALSE	FALSE	FALSE	TRUE	FALSE	FALSE	TRUE
SLC35B1	NP_005818.3	0	0	0	1		-4.669	FALSE	FALSE	FALSE	FALSE	FALSE	FALSE	FALSE	FALSE	FALSE	FALSE
SLC38A1	NP_001265319.1	0	0	0	2	-3.98	-4.688	FALSE	FALSE	FALSE	FALSE	FALSE	FALSE	FALSE	FALSE	FALSE	FALSE
SLC38A4	NP_060488.2	0	0	0	1		-4.7325	FALSE	FALSE	FALSE	FALSE	FALSE	FALSE	FALSE	FALSE	FALSE	FALSE
SLC38A7	NP_060701.1	0	0	0	1	-3.2945	-4.6835	FALSE	FALSE	FALSE	FALSE	FALSE	FALSE	FALSE	FALSE	FALSE	FALSE
SLC38A9	NP_775785.2	0	0	0	1		-4.982	FALSE	FALSE	FALSE	FALSE	FALSE	FALSE	FALSE	FALSE	FALSE	FALSE
SLC39A14	NP_001121903.1	0	0	0	1		-4.8875	FALSE	FALSE	FALSE	FALSE	FALSE	FALSE	FALSE	FALSE	FALSE	FALSE
SLC44A2	NP_065161.3	0	0	2	5	-3.7695	-5.1675	FALSE	FALSE	FALSE	FALSE	FALSE	FALSE	FALSE	FALSE	FALSE	FALSE
SLC4A10	NP_071341.2	0	0	0	4	-4.8935	-4.951	FALSE	FALSE	FALSE	FALSE	FALSE	FALSE	FALSE	FALSE	FALSE	FALSE
SLC4A2	NP_001186621.1	0	0	1	1	-4.423	-5.1875	FALSE	FALSE	FALSE	FALSE	FALSE	FALSE	FALSE	FALSE	FALSE	FALSE
SLC4A4	NP_001091954.1	0	0	0	3	-4.4975	-4.836	FALSE	FALSE	FALSE	FALSE	FALSE	FALSE	TRUE	FALSE	FALSE	TRUE
SLC4A7	NP_003606.3	0	0	0	1	-3.2715	-4.8225	FALSE	FALSE	FALSE	FALSE	FALSE	FALSE	FALSE	FALSE	FALSE	FALSE
SLC4A8	NP_001035049.1	0	0	1	0	-4.374	-5.2205	FALSE	FALSE	FALSE	FALSE	FALSE	FALSE	FALSE	FALSE	FALSE	FALSE
SLC5A7	NP_068587.1	0	0	0	2		-4.992	FALSE	FALSE	FALSE	FALSE	FALSE	FALSE	TRUE	FALSE	FALSE	TRUE
SLC6A2	NP_001034.1	0	0	0	2	-4.4595	-4.6485	FALSE	FALSE	FALSE	FALSE	FALSE	FALSE	FALSE	FALSE	FALSE	FALSE
SLC6A5	NP_004202.4	0	0	0	1	-4.116	-4.774	FALSE	FALSE	FALSE	FALSE	FALSE	FALSE	TRUE	FALSE	FALSE	TRUE
SLC6A6	NP_001127839.2	0	0	1	0	-3.694	-5.217	FALSE	FALSE	FALSE	FALSE	FALSE	FALSE	FALSE	FALSE	FALSE	FALSE
SLC6A8	NP_005620.1	0	0	1	1		-5.6385	FALSE	FALSE	FALSE	FALSE	FALSE	FALSE	TRUE	FALSE	FALSE	TRUE
SLC7A1	NP_003036.1	0	0	0	1	-4.069	-4.865	FALSE	FALSE	FALSE	FALSE	FALSE	FALSE	FALSE	FALSE	FALSE	FALSE
SLC7A3	NP_001041629.1	0	0	1	5		-5.3365	FALSE	FALSE	FALSE	FALSE	FALSE	FALSE	FALSE	FALSE	FALSE	FALSE
SLC9A2	NP_003039.2	0	0	0	1	-3.6205	-4.6395	FALSE	FALSE	FALSE	FALSE	FALSE	FALSE	FALSE	FALSE	FALSE	FALSE
SLC9A7	NP_115980.1	0	0	1	1		-5.086	FALSE	FALSE	FALSE	FALSE	FALSE	FALSE	TRUE	FALSE	FALSE	TRUE
SLC9C2	NP_848622.2	0	0	0	8	-4.2225	-4.866	FALSE	FALSE	FALSE	FALSE	FALSE	FALSE	FALSE	FALSE	FALSE	FALSE
SLCO2B1	NP_009187.1	0	0	0	3		-4.6575	FALSE	FALSE	FALSE	FALSE	FALSE	FALSE	FALSE	FALSE	FALSE	FALSE
SLITRK1	NP_443142.1	0	0	1	0	-4.388	-5.145	FALSE	FALSE	FALSE	FALSE	FALSE	FALSE	FALSE	FALSE	FALSE	FALSE
SLITRK2	NP_001137475.1	0	0	0	3	-3.544	-4.9535	FALSE	FALSE	FALSE	FALSE	FALSE	FALSE	FALSE	FALSE	FALSE	FALSE
SLITRK4	NP_001171678.1	0	0	0	1	-5.2055	-4.803	FALSE	TRUE	TRUE	FALSE	FALSE	FALSE	FALSE	FALSE	FALSE	FALSE
SLITRK5	NP_056382.1	0	0	0	1	-4.576	-5.012	FALSE	FALSE	FALSE	FALSE	FALSE	FALSE	FALSE	FALSE	FALSE	FALSE
SLMAP	NP_001291350.1	0	0	1	0	-3.4095	-5.0615	FALSE	FALSE	FALSE	FALSE	FALSE	FALSE	FALSE	FALSE	FALSE	FALSE
SLU7	NP_006416.3	0	0	0	2	-4.7705	-4.632	FALSE	FALSE	FALSE	FALSE	FALSE	FALSE	FALSE	FALSE	FALSE	FALSE
SMAD5	NP_005894.3	0	0	0	1		-4.849	FALSE	FALSE	FALSE	FALSE	FALSE	FALSE	FALSE	FALSE	FALSE	FALSE
SMARCA5	NP_003592.3	0	0	0	3	-4.402	-4.7955	FALSE	FALSE	FALSE	FALSE	FALSE	FALSE	FALSE	FALSE	FALSE	FALSE
SMARCAD1	NP_001121901.1	0	0	1	2	-3.1975	-5.357	FALSE	FALSE	FALSE	FALSE	FALSE	FALSE	FALSE	FALSE	FALSE	FALSE
SMARCB1	NP_003064.2	0	0	0	1	-4.4915	-4.892	TRUE	FALSE	TRUE	FALSE	FALSE	FALSE	TRUE	TRUE	TRUE	TRUE
SMARCD1	NP_003067.3	0	0	1	0	-3.5675	-5.06	FALSE	FALSE	FALSE	FALSE	FALSE	FALSE	TRUE	FALSE	FALSE	TRUE
SMC1B	NP_683515.4	0	0	0	1	-3.604	-4.7325	FALSE	FALSE	FALSE	FALSE	FALSE	FALSE	FALSE	FALSE	FALSE	FALSE
SMC2	NP_001036015.1	0	0	0	1	-3.9435	-5.0175	FALSE	FALSE	FALSE	FALSE	FALSE	FALSE	FALSE	FALSE	FALSE	FALSE
SMURF2	NP_073576.1	0	0	1	0	-4.196	-5.237	FALSE	FALSE	FALSE	FALSE	FALSE	FALSE	FALSE	FALSE	FALSE	FALSE
SNAI2	NP_003059.1	0	0	0	1		-4.8765	FALSE	FALSE	FALSE	FALSE	FALSE	FALSE	FALSE	FALSE	FALSE	FALSE
SNRNP200	NP_054733.2	0	0	0	2	-4.6015	-4.763	FALSE	FALSE	FALSE	FALSE	FALSE	FALSE	FALSE	FALSE	FALSE	FALSE
SNRPC	NP_003084.1	0	0	0	1		-4.837	FALSE	FALSE	FALSE	FALSE	FALSE	FALSE	FALSE	FALSE	FALSE	FALSE
SNX13	NP_055947.1	0	0	0	1	-4.164	-4.6355	FALSE	FALSE	FALSE	FALSE	FALSE	FALSE	FALSE	FALSE	FALSE	FALSE
SNX14	NP_722523.1	0	0	0	1		-4.926	FALSE	FALSE	FALSE	FALSE	FALSE	FALSE	TRUE	FALSE	FALSE	TRUE
SNX24	NP_054754.1	0	0	0	1		-4.938	FALSE	FALSE	FALSE	FALSE	FALSE	FALSE	FALSE	FALSE	FALSE	FALSE
SNX30	NP_001013012.1	0	0	1	0	-3.826	-5.212	FALSE	FALSE	FALSE	FALSE	FALSE	FALSE	FALSE	FALSE	FALSE	FALSE
SNX9	NP_057308.1	0	0	0	1		-4.892	FALSE	FALSE	FALSE	FALSE	FALSE	FALSE	FALSE	FALSE	FALSE	FALSE
SOCS7	NP_055413.2	0	0	0	1	-4.626	-4.8815	FALSE	FALSE	FALSE	FALSE	FALSE	FALSE	FALSE	FALSE	FALSE	FALSE
SORCS3	NP_055793.1	0	0	1	0	-4.3415	-5.3935	FALSE	FALSE	FALSE	FALSE	FALSE	FALSE	FALSE	FALSE	FALSE	FALSE
SP9	NP_001138722.1	0	0	0	1	-3.3135	-4.898	FALSE	FALSE	FALSE	FALSE	FALSE	FALSE	FALSE	FALSE	FALSE	FALSE
SPNS2	NP_001118230.1	0	0	0	1	-3.1485	-4.6325	FALSE	FALSE	FALSE	FALSE	FALSE	TRUE	FALSE	FALSE	FALSE	FALSE
SPOP	NP_001007227.1	0	0	1	3	-5.8315	-5.71	TRUE	TRUE	TRUE	FALSE	FALSE	FALSE	TRUE	FALSE	FALSE	TRUE
SRF	NP_003122.1	0	0	1	0		-5.0565	FALSE	FALSE	FALSE	FALSE	FALSE	FALSE	FALSE	FALSE	FALSE	FALSE
SRM	NP_003123.2	0	0	1	0	-4.588	-5.2045	FALSE	FALSE	FALSE	FALSE	FALSE	FALSE	FALSE	FALSE	FALSE	FALSE
SRP54	NP_003127.1	0	0	3	0	-6.1185	-5.3275	TRUE	TRUE	TRUE	FALSE	FALSE	FALSE	TRUE	FALSE	FALSE	TRUE
SRPRA	NP_001171313.1	0	0	0	1	-3.2605	-4.677	FALSE	FALSE	FALSE	FALSE	FALSE	FALSE	FALSE	FALSE	FALSE	FALSE
SRRD	NP_001013716.2	0	0	0	4		-4.988	FALSE	FALSE	FALSE	FALSE	FALSE	FALSE	FALSE	FALSE	FALSE	FALSE
SSB	NP_001281074.1	0	0	0	2		-4.9395	FALSE	FALSE	FALSE	FALSE	FALSE	FALSE	FALSE	FALSE	FALSE	FALSE
SSH1	NP_061857.3	0	0	1	0	-3.8145	-5.4155	FALSE	FALSE	FALSE	FALSE	FALSE	FALSE	FALSE	FALSE	FALSE	FALSE
SSH2	NP_203747.2	0	0	0	2	-4.213	-4.817	FALSE	FALSE	FALSE	FALSE	FALSE	FALSE	FALSE	FALSE	FALSE	FALSE
SSRP1	NP_003137.1	0	0	0	1	-4.6705	-4.821	FALSE	FALSE	FALSE	FALSE	FALSE	FALSE	FALSE	FALSE	FALSE	FALSE
SSTR2	NP_001041.1	0	0	1	1		-5.337	FALSE	FALSE	FALSE	FALSE	FALSE	FALSE	FALSE	FALSE	FALSE	FALSE
ST7L	NP_060214.2	0	0	1	0		-5.1345	FALSE	FALSE	FALSE	FALSE	FALSE	FALSE	FALSE	FALSE	FALSE	FALSE
STARD3NL	NP_114405.1	0	0	0	1		-4.6665	FALSE	FALSE	FALSE	FALSE	FALSE	FALSE	FALSE	FALSE	FALSE	FALSE
STAT1	NP_009330.1	0	0	0	1	-5.644	-4.8635	FALSE	TRUE	TRUE	FALSE	FALSE	FALSE	FALSE	FALSE	FALSE	TRUE
STAT3	NP_644805.1	0	0	1	1	-5.2015	-5.135	FALSE	TRUE	TRUE	FALSE	FALSE	FALSE	FALSE	FALSE	FALSE	FALSE
STAT5B	NP_036580.2	0	0	0	4	-3.777	-4.8095	FALSE	FALSE	FALSE	FALSE	FALSE	FALSE	TRUE	FALSE	FALSE	TRUE
STAU2	NP_001157852.1	0	0	0	1	-3.6855	-4.7715	FALSE	FALSE	FALSE	FALSE	FALSE	FALSE	FALSE	FALSE	FALSE	FALSE
STK10	NP_005981.3	0	0	0	1	-3.3775	-4.6655	FALSE	FALSE	FALSE	FALSE	FALSE	FALSE	FALSE	FALSE	FALSE	FALSE
STK11	NP_000446.1	0	0	0	1	-4.614	-4.8785	FALSE	FALSE	FALSE	FALSE	FALSE	FALSE	FALSE	FALSE	FALSE	FALSE
STK31	NP_113602.2	0	0	0	1	-3.5585	-4.6735	FALSE	FALSE	FALSE	FALSE	FALSE	FALSE	FALSE	FALSE	FALSE	FALSE
STK35	NP_543026.2	0	0	0	1	-3.66	-4.639	FALSE	FALSE	FALSE	FALSE	FALSE	FALSE	FALSE	FALSE	FALSE	FALSE
STK39	NP_037365.2	0	0	0	2	-4.3495	-4.7285	FALSE	FALSE	FALSE	FALSE	FALSE	FALSE	FALSE	FALSE	FALSE	FALSE
STOML2	NP_038470.1	0	0	0	1	-3.7205	-4.865	FALSE	FALSE	FALSE	FALSE	FALSE	FALSE	FALSE	FALSE	FALSE	FALSE
STRBP	NP_001363036.1	0	0	0	1	-3.5885	-4.6235	FALSE	FALSE	FALSE	FALSE	FALSE	FALSE	FALSE	FALSE	FALSE	FALSE
STS	NP_001307679.1	0	0	0	2		-4.668	FALSE	FALSE	FALSE	FALSE	FALSE	FALSE	TRUE	FALSE	FALSE	TRUE
STT3A	NP_001265432.1	0	0	0	2	-2.882	-4.7755	FALSE	FALSE	FALSE	FALSE	FALSE	FALSE	TRUE	FALSE	FALSE	TRUE
STT3B	NP_849193.1	0	0	0	1	-4.3275	-4.818	FALSE	FALSE	FALSE	FALSE	FALSE	FALSE	TRUE	FALSE	FALSE	TRUE
STX3	NP_004168.1	0	0	0	11	-3.977	-4.6645	FALSE	FALSE	FALSE	FALSE	FALSE	FALSE	FALSE	FALSE	FALSE	FALSE
STXBP3	NP_009200.2	0	0	0	3	-3.2375	-4.7515	FALSE	FALSE	FALSE	FALSE	FALSE	FALSE	FALSE	FALSE	FALSE	FALSE
STXBP5	NP_001121187.1	0	0	0	1	-3.312	-4.6895	FALSE	FALSE	FALSE	FALSE	FALSE	FALSE	FALSE	FALSE	FALSE	FALSE
STXBP5L	NP_055795.1	0	0	0	1	-3.4125	-4.7235	FALSE	FALSE	FALSE	FALSE	FALSE	FALSE	FALSE	FALSE	FALSE	FALSE
SUPT20H	NP_001265409.1	0	0	4	2	-3.7585	-5.246	FALSE	FALSE	FALSE	FALSE	FALSE	FALSE	FALSE	FALSE	FALSE	FALSE
SUPT5H	NP_003160.2	0	0	0	1	-3.7655	-4.69	FALSE	FALSE	FALSE	FALSE	FALSE	FALSE	FALSE	FALSE	FALSE	FALSE
SUV39H1	NP_003164.1	0	0	0	1		-4.7785	FALSE	FALSE	FALSE	FALSE	FALSE	FALSE	FALSE	FALSE	FALSE	FALSE
SWT1	NP_001098988.1	0	0	0	1	-5.1835	-4.701	FALSE	TRUE	TRUE	FALSE	FALSE	FALSE	FALSE	FALSE	FALSE	FALSE
SYAP1	NP_116185.2	0	0	0	1	-3.397	-4.628	FALSE	FALSE	FALSE	FALSE	FALSE	FALSE	FALSE	FALSE	FALSE	FALSE
SYCP1	NP_001269470.1	0	0	0	1	-4.292	-4.6555	FALSE	FALSE	FALSE	FALSE	FALSE	FALSE	FALSE	FALSE	FALSE	FALSE
SYN1	NP_598006.1	0	0	0	1	-4.274	-4.635	FALSE	FALSE	FALSE	FALSE	FALSE	FALSE	TRUE	FALSE	FALSE	TRUE
SYNCRIP	NP_001153145.1	0	0	0	1	-5.3585	-4.743	FALSE	TRUE	TRUE	FALSE	FALSE	FALSE	TRUE	FALSE	FALSE	TRUE
SYS1	NP_001184058.1	0	0	0	1		-4.736	FALSE	FALSE	FALSE	FALSE	FALSE	FALSE	FALSE	FALSE	FALSE	FALSE
SYTL4	NP_001123368.1	0	0	0	1		-4.676	FALSE	FALSE	FALSE	FALSE	FALSE	FALSE	FALSE	FALSE	FALSE	FALSE
TACC2	NP_996742.1	0	0	0	1	-3.963	-4.6545	FALSE	FALSE	FALSE	FALSE	FALSE	FALSE	FALSE	FALSE	FALSE	FALSE
TACR1	NP_001049.1	0	0	0	2	-4.204	-4.623	FALSE	FALSE	FALSE	FALSE	FALSE	FALSE	FALSE	FALSE	FALSE	FALSE
TADA2A	NP_001479.4	0	0	0	1		-5.048	FALSE	FALSE	FALSE	FALSE	FALSE	FALSE	FALSE	FALSE	FALSE	FALSE
TAF2	NP_003175.2	0	0	0	1	-4.429	-4.688	FALSE	FALSE	FALSE	FALSE	FALSE	FALSE	TRUE	FALSE	FALSE	TRUE
TAF5	NP_008882.2	0	0	0	1		-4.926	FALSE	FALSE	FALSE	FALSE	FALSE	FALSE	FALSE	FALSE	FALSE	FALSE
TAF7	NP_005633.2	0	0	0	1		-4.8265	FALSE	FALSE	FALSE	FALSE	FALSE	FALSE	FALSE	FALSE	FALSE	FALSE
TANC2	NP_079461.2	0	0	1	1	-3.373	-5.182	FALSE	FALSE	FALSE	FALSE	FALSE	FALSE	TRUE	FALSE	FALSE	TRUE
TAOK3	NP_057365.3	0	0	0	1	-3.4795	-4.7775	FALSE	FALSE	FALSE	FALSE	FALSE	FALSE	FALSE	FALSE	FALSE	FALSE
TAS2R10	NP_076410.1	0	0	0	1		-4.721	FALSE	FALSE	FALSE	FALSE	FALSE	FALSE	FALSE	FALSE	FALSE	FALSE
TAS2R30	NP_001091112.1	0	0	0	2		-4.7315	FALSE	FALSE	FALSE	FALSE	FALSE	FALSE	FALSE	FALSE	FALSE	FALSE
TAS2R4	NP_058640.1	0	0	0	1		-4.804	FALSE	FALSE	FALSE	FALSE	FALSE	FALSE	FALSE	FALSE	FALSE	FALSE
TAS2R40	NP_795363.1	0	0	0	1	-3.346	-4.7635	FALSE	FALSE	FALSE	FALSE	FALSE	FALSE	FALSE	FALSE	FALSE	FALSE
TAS2R8	NP_076407.1	0	0	0	1		-4.6595	FALSE	FALSE	FALSE	FALSE	FALSE	FALSE	FALSE	FALSE	FALSE	FALSE
TASL	NP_079435.1	0	0	0	1		-4.806	FALSE	FALSE	FALSE	FALSE	FALSE	FALSE	FALSE	FALSE	FALSE	FALSE
TASP1	NP_060184.2	0	0	1	1	-4.0385	-5.076	FALSE	FALSE	FALSE	FALSE	FALSE	FALSE	TRUE	FALSE	FALSE	TRUE
TBC1D25	NP_002527.1	0	0	0	1		-4.634	FALSE	FALSE	FALSE	FALSE	FALSE	FALSE	FALSE	FALSE	FALSE	FALSE
TBC1D31	NP_663622.2	0	0	0	1		-4.706	FALSE	FALSE	FALSE	FALSE	FALSE	FALSE	FALSE	FALSE	FALSE	FALSE
TBCEL	NP_001123519.1	0	0	1	0	-4.506	-5.162	FALSE	FALSE	FALSE	FALSE	FALSE	FALSE	FALSE	FALSE	FALSE	FALSE
TBL1X	NP_005638.1	0	0	1	0	-4.407	-5.8815	FALSE	FALSE	FALSE	FALSE	FALSE	FALSE	FALSE	FALSE	FALSE	FALSE
TBL3	NP_006444.2	0	0	0	1	-3.0525	-4.629	FALSE	FALSE	FALSE	FALSE	FALSE	FALSE	FALSE	FALSE	FALSE	FALSE
TBPL1	NP_001240605.1	0	0	0	1	-3.2075	-4.7945	FALSE	FALSE	FALSE	FALSE	FALSE	FALSE	FALSE	FALSE	FALSE	FALSE
TBX18	NP_001073977.1	0	0	0	1	-3.4765	-4.733	FALSE	FALSE	FALSE	FALSE	FALSE	FALSE	TRUE	FALSE	FALSE	TRUE
TCEA1	NP_006747.1	0	0	0	2		-4.7575	FALSE	FALSE	FALSE	FALSE	FALSE	FALSE	FALSE	FALSE	FALSE	FALSE
TCEANC	NP_689847.2	0	0	0	3		-4.866	FALSE	FALSE	FALSE	FALSE	FALSE	FALSE	FALSE	FALSE	FALSE	FALSE
TCHHL1	NP_001008536.1	0	0	0	2		-4.995	FALSE	FALSE	FALSE	FALSE	FALSE	FALSE	FALSE	FALSE	FALSE	FALSE
TDRD3	NP_001139542.1	0	0	0	1	-3.3125	-4.624	FALSE	FALSE	FALSE	FALSE	FALSE	FALSE	FALSE	FALSE	FALSE	FALSE
TECTA	NP_005413.2	0	0	0	2	-3.66	-4.79	FALSE	FALSE	FALSE	FALSE	FALSE	FALSE	FALSE	FALSE	FALSE	FALSE
TFCP2	NP_005644.2	0	0	0	2		-5.0145	FALSE	FALSE	FALSE	FALSE	FALSE	FALSE	FALSE	FALSE	FALSE	FALSE
THAP1	NP_060575.1	0	0	0	1	-3.321	-4.7505	FALSE	FALSE	FALSE	FALSE	FALSE	FALSE	TRUE	FALSE	FALSE	TRUE
THOC1	NP_005122.2	0	0	0	1	-3.514	-4.8055	FALSE	FALSE	FALSE	FALSE	FALSE	FALSE	FALSE	FALSE	FALSE	FALSE
THPO	NP_000451.1	0	0	0	2	-3.7345	-4.6415	FALSE	FALSE	FALSE	FALSE	FALSE	FALSE	FALSE	FALSE	FALSE	FALSE
TIGAR	NP_065108.1	0	0	0	1	-3.8795	-4.698	FALSE	FALSE	FALSE	FALSE	FALSE	FALSE	FALSE	FALSE	FALSE	FALSE
TLK1	NP_001130026.1	0	0	0	1	-3.707	-5.001	FALSE	FALSE	FALSE	FALSE	FALSE	FALSE	FALSE	FALSE	FALSE	FALSE
TLR8	NP_619542.1	0	0	1	2	-3.7395	-5.119	FALSE	FALSE	FALSE	FALSE	FALSE	FALSE	FALSE	FALSE	FALSE	FALSE
TLX3	NP_066305.2	0	0	0	2		-4.627	FALSE	FALSE	FALSE	FALSE	FALSE	FALSE	FALSE	FALSE	FALSE	FALSE
TM9SF2	NP_004791.1	0	0	0	1	-3.099	-4.715	FALSE	FALSE	FALSE	FALSE	FALSE	FALSE	FALSE	FALSE	FALSE	FALSE
TMC7	NP_001153836.1	0	0	0	4		-4.714	FALSE	FALSE	FALSE	FALSE	FALSE	FALSE	FALSE	FALSE	FALSE	FALSE
TMEM144	NP_060812.2	0	0	0	1	-3.666	-4.8095	FALSE	FALSE	FALSE	FALSE	FALSE	FALSE	FALSE	FALSE	FALSE	FALSE
TMEM164	NP_115603.2	0	0	1	0	-3.519	-5.087	FALSE	FALSE	FALSE	FALSE	FALSE	FALSE	FALSE	FALSE	FALSE	FALSE
TMEM184C	NP_060711.2	0	0	0	3		-4.7805	FALSE	FALSE	FALSE	FALSE	FALSE	FALSE	FALSE	FALSE	FALSE	FALSE
TMEM201	NP_001124396.2	0	0	0	1	-3.4595	-4.651	FALSE	FALSE	FALSE	FALSE	FALSE	FALSE	FALSE	FALSE	FALSE	FALSE
TMEM239	NP_001161142.1	0	0	0	1		-4.6585	FALSE	FALSE	FALSE	FALSE	FALSE	FALSE	FALSE	FALSE	FALSE	FALSE
TMEM39A	NP_060736.1	0	0	0	2	-3.15	-4.912	FALSE	FALSE	FALSE	FALSE	FALSE	FALSE	FALSE	FALSE	FALSE	FALSE
TMEM59	NP_001291972.1	0	0	0	2		-4.707	FALSE	FALSE	FALSE	FALSE	FALSE	FALSE	FALSE	FALSE	FALSE	FALSE
TMTC3	NP_861448.2	0	0	0	2	-3.957	-4.729	FALSE	FALSE	FALSE	FALSE	FALSE	FALSE	TRUE	FALSE	FALSE	TRUE
TNFAIP1	NP_066960.1	0	0	1	0		-5.069	FALSE	FALSE	FALSE	FALSE	FALSE	FALSE	FALSE	FALSE	FALSE	FALSE
TNFRSF13C	NP_443177.1	0	0	1	0	-2.8115	-5.5295	FALSE	FALSE	FALSE	FALSE	FALSE	FALSE	FALSE	FALSE	FALSE	FALSE
TNNC1	NP_003271.1	0	0	0	1	-4.124	-4.867	FALSE	FALSE	FALSE	FALSE	FALSE	FALSE	FALSE	FALSE	FALSE	FALSE
TNPO1	NP_002261.3	0	0	1	4	-2.847	-5.6395	FALSE	FALSE	FALSE	FALSE	FALSE	FALSE	FALSE	FALSE	FALSE	FALSE
TNPO3	NP_036602.1	0	0	0	1	-4.4585	-4.6765	FALSE	FALSE	FALSE	FALSE	FALSE	FALSE	FALSE	FALSE	FALSE	TRUE
TNRC6C	NP_061869.2	0	0	0	2	-2.9545	-4.84	FALSE	FALSE	FALSE	FALSE	FALSE	FALSE	FALSE	FALSE	FALSE	FALSE
TOM1L2	NP_001337261.1	0	0	2	0	-4.006	-5.347	FALSE	FALSE	FALSE	FALSE	FALSE	FALSE	FALSE	FALSE	FALSE	FALSE
TOP2A	NP_001058.2	0	0	0	3	-3.7545	-4.847	FALSE	FALSE	FALSE	FALSE	FALSE	FALSE	FALSE	FALSE	FALSE	FALSE
TOP2B	NP_001317629.1	0	0	2	1	-4.363	-5.2925	FALSE	FALSE	FALSE	FALSE	FALSE	FALSE	FALSE	FALSE	FALSE	FALSE
TOX3	NP_001073899.2	0	0	0	3	-3.991	-4.663	FALSE	FALSE	FALSE	FALSE	FALSE	FALSE	FALSE	FALSE	FALSE	FALSE
TPCN1	NP_001137291.1	0	0	0	1	-4.7675	-4.7675	FALSE	FALSE	FALSE	FALSE	FALSE	FALSE	FALSE	FALSE	FALSE	FALSE
TPM3	NP_689476.2	0	0	0	1	-4.27	-4.7715	FALSE	FALSE	FALSE	FALSE	FALSE	FALSE	TRUE	FALSE	FALSE	TRUE
TRAF1	NP_001177874.1	0	0	0	1	-3.336	-4.765	FALSE	FALSE	FALSE	FALSE	FALSE	FALSE	FALSE	FALSE	FALSE	FALSE
TRAF3	NP_003291.2	0	0	0	1	-5.0055	-5.053	FALSE	FALSE	FALSE	FALSE	FALSE	FALSE	FALSE	FALSE	FALSE	FALSE
TRAF3IP2	NP_679211.2	0	0	0	1		-4.6605	FALSE	FALSE	FALSE	FALSE	FALSE	FALSE	FALSE	FALSE	FALSE	FALSE
TRAK1	NP_001036111.1	0	0	0	1	-3.476	-4.7395	FALSE	FALSE	FALSE	FALSE	FALSE	FALSE	FALSE	FALSE	FALSE	FALSE
TRAPPC13	NP_001087224.1	0	0	0	1	-4.0425	-4.7285	FALSE	FALSE	FALSE	FALSE	FALSE	FALSE	FALSE	FALSE	FALSE	FALSE
TRAPPC6A	NP_077013.1	0	0	0	65	-2.695	-4.7795	FALSE	FALSE	FALSE	FALSE	FALSE	FALSE	FALSE	FALSE	FALSE	FALSE
TRIM11	NP_660215.1	0	0	0	1	-4.213	-4.895	FALSE	FALSE	FALSE	FALSE	FALSE	FALSE	FALSE	FALSE	FALSE	FALSE
TRIM13	NP_001007279.1	0	0	0	2		-4.804	FALSE	FALSE	FALSE	FALSE	FALSE	FALSE	FALSE	FALSE	FALSE	FALSE
TRIM2	NP_001123539.1	0	0	0	1	-4.4125	-4.6475	FALSE	FALSE	FALSE	FALSE	FALSE	FALSE	FALSE	FALSE	FALSE	FALSE
TRIM21	NP_003132.2	0	0	0	2	-3.387	-4.653	FALSE	FALSE	FALSE	FALSE	FALSE	FALSE	FALSE	FALSE	FALSE	FALSE
TRIM24	NP_056989.2	0	0	0	1		-4.853	FALSE	FALSE	FALSE	FALSE	FALSE	FALSE	FALSE	FALSE	FALSE	FALSE
TRIM37	NP_056109.1	0	0	0	1	-3.717	-4.691	FALSE	FALSE	FALSE	FALSE	FALSE	FALSE	TRUE	FALSE	FALSE	TRUE
TRIM62	NP_060677.2	0	0	0	3	-3.168	-4.9155	FALSE	FALSE	FALSE	FALSE	FALSE	FALSE	FALSE	FALSE	FALSE	FALSE
TRIM8	NP_112174.2	0	0	1	0	-4.2225	-5.147	FALSE	FALSE	FALSE	FALSE	FALSE	FALSE	TRUE	FALSE	FALSE	TRUE
TRIM9	NP_055978.4	0	0	0	2	-3.7875	-4.8465	FALSE	FALSE	FALSE	FALSE	FALSE	FALSE	FALSE	FALSE	FALSE	FALSE
TRMT2A	NP_892029.2	0	0	0	1	-4.47	-4.785	FALSE	FALSE	FALSE	FALSE	FALSE	FALSE	FALSE	FALSE	FALSE	FALSE
TRPC4	NP_057263.1	0	0	1	1	-5.1805	-5.1425	FALSE	TRUE	TRUE	FALSE	FALSE	FALSE	FALSE	FALSE	FALSE	FALSE
TRPC5	NP_036603.1	0	0	0	2	-4.172	-4.9395	FALSE	FALSE	FALSE	FALSE	FALSE	FALSE	FALSE	FALSE	FALSE	FALSE
TRPM3	NP_001353076.1	0	0	0	1	-4.1835	-4.7245	TRUE	FALSE	TRUE	FALSE	FALSE	FALSE	TRUE	TRUE	TRUE	TRUE
TRPM7	NP_060142.3	0	0	0	1	-4.1155	-4.727	FALSE	FALSE	FALSE	FALSE	FALSE	FALSE	FALSE	FALSE	FALSE	FALSE
TRPS1	NP_054831.2	0	0	1	0	-3.345	-5.284	FALSE	FALSE	FALSE	FALSE	FALSE	FALSE	TRUE	FALSE	FALSE	TRUE
TRPV6	NP_061116.5	0	0	0	55	-3.35	-4.695	FALSE	FALSE	FALSE	FALSE	FALSE	FALSE	TRUE	FALSE	FALSE	TRUE
TSC22D2	NP_055594.1	0	0	0	1	-3.21	-4.653	FALSE	FALSE	FALSE	FALSE	FALSE	FALSE	FALSE	FALSE	FALSE	FALSE
TSGA10	NP_079520.1	0	0	0	1	-3.7885	-4.7475	FALSE	FALSE	FALSE	FALSE	FALSE	FALSE	FALSE	FALSE	FALSE	FALSE
TSPAN14	NP_112189.2	0	0	0	1	-3.672	-4.641	FALSE	FALSE	FALSE	FALSE	FALSE	FALSE	FALSE	FALSE	FALSE	FALSE
TSPAN17	NP_001353420.1	0	0	0	3	-4.0145	-4.7845	FALSE	FALSE	FALSE	FALSE	FALSE	FALSE	FALSE	FALSE	FALSE	FALSE
TSPAN33	NP_848657.1	0	0	0	1		-4.9515	FALSE	FALSE	FALSE	FALSE	FALSE	FALSE	FALSE	FALSE	FALSE	FALSE
TSPAN5	NP_005714.2	0	0	0	1	-3.5975	-4.6305	FALSE	FALSE	FALSE	FALSE	FALSE	FALSE	FALSE	FALSE	FALSE	FALSE
TTC7A	NP_001275880.1	0	0	2	0	-3.5105	-5.23	FALSE	FALSE	FALSE	FALSE	FALSE	FALSE	TRUE	FALSE	FALSE	TRUE
TTC7B	NP_001010854.1	0	0	1	0	-3.8485	-5.2335	FALSE	FALSE	FALSE	FALSE	FALSE	FALSE	FALSE	FALSE	FALSE	FALSE
TUBA1B	NP_006073.2	0	0	0	1		-4.9405	FALSE	FALSE	FALSE	FALSE	FALSE	FALSE	FALSE	FALSE	FALSE	FALSE
TUBA3C	NP_005992.1	0	0	1	2	-2.999	-5.262	FALSE	FALSE	FALSE	FALSE	FALSE	FALSE	FALSE	FALSE	FALSE	FALSE
TUBB	NP_821133.1	0	0	1	0	-6.836	-5.4445	FALSE	FALSE	FALSE	FALSE	FALSE	FALSE	TRUE	FALSE	FALSE	TRUE
TUBB2B	NP_821080.1	0	0	1	1	-5.1615	-5.2865	FALSE	TRUE	TRUE	FALSE	FALSE	FALSE	TRUE	FALSE	FALSE	TRUE
TUBB3	NP_006077.2	0	0	1	0	-4.24	-5.555	FALSE	FALSE	FALSE	FALSE	FALSE	FALSE	TRUE	FALSE	FALSE	TRUE
TUBB4A	NP_006078.2	0	0	1	0	-4.2455	-6.177	FALSE	FALSE	FALSE	FALSE	FALSE	FALSE	TRUE	FALSE	FALSE	TRUE
TUBGCP3	NP_006313.1	0	0	0	4		-4.7245	FALSE	FALSE	FALSE	FALSE	FALSE	FALSE	FALSE	FALSE	FALSE	FALSE
TUT4	NP_001009881.1	0	0	2	0		-5.226	FALSE	FALSE	FALSE	FALSE	FALSE	FALSE	FALSE	FALSE	FALSE	FALSE
TWIST1	NP_000465.1	0	0	0	1		-4.6365	FALSE	FALSE	FALSE	FALSE	FALSE	FALSE	TRUE	FALSE	FALSE	TRUE
TWIST2	NP_476527.1	0	0	0	1		-4.71	FALSE	FALSE	FALSE	FALSE	FALSE	FALSE	TRUE	FALSE	FALSE	TRUE
TWNK	NP_068602.2	0	0	0	1		-4.634	FALSE	FALSE	FALSE	FALSE	FALSE	FALSE	FALSE	FALSE	FALSE	FALSE
TXNDC2	NP_001091999.1	0	0	1	8	-3.3335	-5.091	FALSE	FALSE	FALSE	FALSE	FALSE	FALSE	FALSE	FALSE	FALSE	FALSE
TXNDC9	NP_005774.2	0	0	0	2		-4.8735	FALSE	FALSE	FALSE	FALSE	FALSE	FALSE	FALSE	FALSE	FALSE	FALSE
TXNL4A	NP_006692.1	0	0	1	0	-4.7295	-5.192	FALSE	FALSE	FALSE	FALSE	FALSE	FALSE	TRUE	FALSE	FALSE	TRUE
U2SURP	NP_001073884.1	0	0	0	2	-4.67	-4.779	FALSE	FALSE	FALSE	FALSE	FALSE	FALSE	FALSE	FALSE	FALSE	FALSE
UBA3	NP_937838.1	0	0	0	1		-4.6565	FALSE	FALSE	FALSE	FALSE	FALSE	FALSE	FALSE	FALSE	FALSE	FALSE
UBE2A	NP_003327.2	0	0	2	1		-5.9535	FALSE	FALSE	FALSE	FALSE	FALSE	FALSE	TRUE	FALSE	FALSE	TRUE
UBE2E1	NP_003332.1	0	0	1	0	-3.1455	-5.927	FALSE	FALSE	FALSE	FALSE	FALSE	FALSE	FALSE	FALSE	FALSE	FALSE
UBE2M	NP_003960.1	0	0	0	2	-4.2805	-4.9945	FALSE	FALSE	FALSE	FALSE	FALSE	FALSE	FALSE	FALSE	FALSE	FALSE
UBE2QL1	NP_001138633.1	0	0	1	0		-5.8785	FALSE	FALSE	FALSE	FALSE	FALSE	FALSE	FALSE	FALSE	FALSE	FALSE
UBE2R2	NP_060281.2	0	0	1	0	-4.4035	-5.356	FALSE	FALSE	FALSE	FALSE	FALSE	FALSE	FALSE	FALSE	FALSE	FALSE
UBE2V1	NP_001244322.1	0	0	0	1	-3.3305	-4.783	FALSE	FALSE	FALSE	FALSE	FALSE	FALSE	FALSE	FALSE	FALSE	FALSE
UBE2V2	NP_003341.1	0	0	0	1	-3.5685	-4.8685	FALSE	FALSE	FALSE	FALSE	FALSE	FALSE	FALSE	FALSE	FALSE	FALSE
UBE3A	NP_570853.1	0	0	3	1	-6.172	-5.4345	FALSE	TRUE	TRUE	FALSE	FALSE	FALSE	TRUE	TRUE	FALSE	TRUE
UBE4A	NP_004779.2	0	0	0	1	-4.313	-4.786	FALSE	FALSE	FALSE	FALSE	FALSE	FALSE	TRUE	FALSE	FALSE	TRUE
UBIAD1	NP_037451.1	0	0	0	1		-4.758	FALSE	FALSE	FALSE	FALSE	FALSE	FALSE	FALSE	FALSE	FALSE	FALSE
UBN1	NP_001072982.1	0	0	0	1	-3.688	-4.753	FALSE	FALSE	FALSE	FALSE	FALSE	FALSE	FALSE	FALSE	FALSE	FALSE
UBQLN1	NP_038466.2	0	0	0	2	-3.185	-4.6215	FALSE	FALSE	FALSE	FALSE	FALSE	FALSE	FALSE	FALSE	FALSE	FALSE
UBTF	NP_055048.1	0	0	1	1	-5.3165	-5.8605	TRUE	TRUE	TRUE	FALSE	FALSE	FALSE	TRUE	TRUE	TRUE	TRUE
UCHL5	NP_057068.1	0	0	1	0	-3.2645	-5.1145	FALSE	FALSE	FALSE	FALSE	FALSE	FALSE	FALSE	FALSE	FALSE	FALSE
UGT8	NP_001309043.2	0	0	0	3	-4.3375	-4.9845	FALSE	FALSE	FALSE	FALSE	FALSE	FALSE	FALSE	FALSE	FALSE	FALSE
UNC5D	NP_543148.2	0	0	0	2	-4.2845	-4.7005	FALSE	FALSE	FALSE	FALSE	FALSE	FALSE	FALSE	FALSE	FALSE	FALSE
URGCP	NP_001071131.1	0	0	0	1	-3.3925	-4.6315	FALSE	FALSE	FALSE	FALSE	FALSE	FALSE	FALSE	FALSE	FALSE	FALSE
USP10	NP_005144.2	0	0	0	1	-2.9485	-4.661	FALSE	FALSE	FALSE	FALSE	FALSE	FALSE	FALSE	FALSE	FALSE	FALSE
USP11	NP_001358001.1	0	0	0	1	-4.479	-4.741	FALSE	FALSE	FALSE	FALSE	FALSE	FALSE	FALSE	FALSE	FALSE	FALSE
USP14	NP_005142.1	0	0	0	2		-4.8475	FALSE	FALSE	FALSE	FALSE	FALSE	FALSE	TRUE	FALSE	FALSE	TRUE
USP26	NP_114113.1	0	0	0	3		-4.8315	FALSE	FALSE	FALSE	FALSE	FALSE	FALSE	FALSE	FALSE	FALSE	FALSE
USP33	NP_963918.1	0	0	0	1		-4.9625	FALSE	FALSE	FALSE	FALSE	FALSE	FALSE	FALSE	FALSE	FALSE	FALSE
USP37	NP_065986.3	0	0	0	1	-3.583	-5.011	FALSE	FALSE	FALSE	FALSE	FALSE	FALSE	FALSE	FALSE	FALSE	FALSE
USP39	NP_006581.2	0	0	0	1		-4.702	FALSE	FALSE	FALSE	FALSE	FALSE	FALSE	FALSE	FALSE	FALSE	FALSE
USP43	NP_694942.3	0	0	0	1	-3.4955	-4.619	FALSE	FALSE	FALSE	FALSE	FALSE	FALSE	FALSE	FALSE	FALSE	FALSE
USP48	NP_115612.4	0	0	1	0	-4.173	-5.469	FALSE	FALSE	FALSE	FALSE	FALSE	FALSE	FALSE	FALSE	FALSE	FALSE
USP5	NP_001092006.1	0	0	0	3	-4.313	-4.7215	FALSE	FALSE	FALSE	FALSE	FALSE	FALSE	FALSE	FALSE	FALSE	FALSE
USP51	NP_958443.1	0	0	0	1		-4.835	FALSE	FALSE	FALSE	FALSE	FALSE	FALSE	FALSE	FALSE	FALSE	FALSE
USP7	NP_003461.2	0	0	0	4	-6.6635	-4.9175	TRUE	TRUE	TRUE	FALSE	FALSE	FALSE	TRUE	TRUE	FALSE	TRUE
UTP15	NP_115551.2	0	0	0	1		-4.675	FALSE	FALSE	FALSE	FALSE	FALSE	FALSE	FALSE	FALSE	FALSE	FALSE
UXS1	NP_001240804.1	0	0	0	1		-4.754	FALSE	FALSE	FALSE	FALSE	FALSE	FALSE	FALSE	FALSE	FALSE	FALSE
UXT	NP_705582.1	0	0	0	1	-3.601	-4.6535	FALSE	FALSE	FALSE	FALSE	FALSE	FALSE	FALSE	FALSE	FALSE	FALSE
VAMP1	NP_055046.1	0	0	0	1		-4.735	FALSE	FALSE	FALSE	FALSE	FALSE	FALSE	FALSE	FALSE	FALSE	FALSE
VBP1	NP_001290472.1	0	0	1	0		-5.148	FALSE	FALSE	FALSE	FALSE	FALSE	FALSE	FALSE	FALSE	FALSE	FALSE
VDAC1	NP_003365.1	0	0	0	2	-2.947	-4.737	FALSE	FALSE	FALSE	FALSE	FALSE	FALSE	FALSE	FALSE	FALSE	FALSE
VDAC2	NP_001171712.1	0	0	0	1		-4.7055	FALSE	FALSE	FALSE	FALSE	FALSE	FALSE	FALSE	FALSE	FALSE	FALSE
VIL1	NP_009058.2	0	0	0	1	-3.196	-4.7645	FALSE	FALSE	FALSE	FALSE	FALSE	FALSE	FALSE	FALSE	FALSE	FALSE
VMP1	NP_001316331.1	0	0	0	2		-4.912	FALSE	FALSE	FALSE	FALSE	FALSE	FALSE	FALSE	FALSE	FALSE	FALSE
VPS26C	NP_006043.1	0	0	0	2	-3.124	-4.8935	FALSE	FALSE	FALSE	FALSE	FALSE	FALSE	FALSE	FALSE	FALSE	FALSE
VPS29	NP_476528.1	0	0	0	1		-4.7075	FALSE	FALSE	FALSE	FALSE	FALSE	FALSE	FALSE	FALSE	FALSE	FALSE
VPS35	NP_060676.2	0	0	1	4		-5.3355	FALSE	FALSE	FALSE	FALSE	FALSE	FALSE	FALSE	FALSE	FALSE	FALSE
VPS35L	NP_064710.5	0	0	1	0	-3.514	-5.2975	FALSE	FALSE	FALSE	FALSE	FALSE	FALSE	FALSE	FALSE	FALSE	FALSE
VPS39	NP_056104.2	0	0	0	1	-3.807	-4.6625	FALSE	FALSE	FALSE	FALSE	FALSE	FALSE	FALSE	FALSE	FALSE	FALSE
VPS4A	NP_037377.1	0	0	0	4	-4.8475	-5.01	FALSE	FALSE	FALSE	FALSE	FALSE	FALSE	TRUE	FALSE	FALSE	TRUE
VPS4B	NP_004860.2	0	0	0	2		-4.6715	FALSE	FALSE	FALSE	FALSE	FALSE	FALSE	FALSE	FALSE	FALSE	FALSE
VRK1	NP_003375.1	0	0	0	1	-3.19	-4.9045	FALSE	FALSE	FALSE	FALSE	FALSE	FALSE	TRUE	FALSE	FALSE	TRUE
VSIG1	NP_001164024.1	0	0	0	1		-4.7565	FALSE	FALSE	FALSE	FALSE	FALSE	FALSE	FALSE	FALSE	FALSE	FALSE
VSTM2L	NP_542174.1	0	0	0	1	-2.761	-4.696	FALSE	FALSE	FALSE	FALSE	FALSE	FALSE	FALSE	FALSE	FALSE	FALSE
WAPL	NP_055860.1	0	0	2	1	-4.86	-5.353	FALSE	FALSE	FALSE	FALSE	FALSE	FALSE	FALSE	FALSE	FALSE	FALSE
WDR1	NP_059830.1	0	0	0	1	-2.9975	-4.856	FALSE	FALSE	FALSE	FALSE	FALSE	FALSE	FALSE	FALSE	FALSE	FALSE
WDR47	NP_055784.3	0	0	0	1		-4.759	FALSE	FALSE	FALSE	FALSE	FALSE	FALSE	FALSE	FALSE	FALSE	FALSE
WDR77	NP_001303991.1	0	0	0	1	-4.4915	-4.817	FALSE	FALSE	FALSE	FALSE	FALSE	FALSE	FALSE	FALSE	FALSE	FALSE
WDR81	NP_001157281.1	0	0	0	1	-3.242	-4.792	FALSE	FALSE	FALSE	FALSE	FALSE	FALSE	TRUE	FALSE	FALSE	TRUE
WNK3	NP_065973.2	0	0	0	1	-4.4345	-4.8815	FALSE	FALSE	FALSE	FALSE	FALSE	FALSE	TRUE	FALSE	FALSE	TRUE
WT1	NP_077744.4	0	0	2	0	-5.158	-5.095	FALSE	TRUE	TRUE	FALSE	FALSE	FALSE	TRUE	FALSE	FALSE	TRUE
WWP2	NP_008945.2	0	0	0	1	-3.6735	-4.8245	FALSE	FALSE	FALSE	FALSE	FALSE	FALSE	FALSE	FALSE	FALSE	FALSE
XK	NP_066569.1	0	0	0	45		-5.034	FALSE	FALSE	FALSE	FALSE	FALSE	FALSE	FALSE	FALSE	FALSE	FALSE
XNDC1N	NP_001362776.1	0	0	9	5		-6.244	FALSE	FALSE	FALSE	FALSE	FALSE	FALSE	FALSE	FALSE	FALSE	FALSE
XPNPEP1	NP_065116.3	0	0	0	1	-4.03	-4.721	FALSE	FALSE	FALSE	FALSE	FALSE	FALSE	FALSE	FALSE	FALSE	FALSE
XPO4	NP_071904.4	0	0	1	1	-3.6675	-5.6495	FALSE	FALSE	FALSE	FALSE	FALSE	FALSE	FALSE	FALSE	FALSE	FALSE
XPO6	NP_055986.1	0	0	0	1	-4.4135	-5.015	FALSE	FALSE	FALSE	FALSE	FALSE	FALSE	FALSE	FALSE	FALSE	FALSE
XPO7	NP_055839.3	0	0	1	0	-4.977	-5.426	FALSE	FALSE	FALSE	FALSE	FALSE	FALSE	FALSE	FALSE	FALSE	FALSE
XPOT	NP_009166.2	0	0	0	2	-4.091	-4.7185	FALSE	FALSE	FALSE	FALSE	FALSE	FALSE	FALSE	FALSE	FALSE	FALSE
XRN1	NP_061874.3	0	0	0	1	-4.232	-4.724	FALSE	FALSE	FALSE	FALSE	FALSE	FALSE	FALSE	FALSE	FALSE	FALSE
XRN2	NP_036387.2	0	0	0	1		-4.751	FALSE	FALSE	FALSE	FALSE	FALSE	FALSE	FALSE	FALSE	FALSE	FALSE
YES1	NP_005424.1	0	0	0	2	-4.6385	-4.6965	FALSE	FALSE	FALSE	FALSE	FALSE	FALSE	FALSE	FALSE	FALSE	FALSE
YIPF5	NP_001020118.1	0	0	0	1		-4.9405	FALSE	FALSE	FALSE	FALSE	FALSE	FALSE	FALSE	FALSE	FALSE	FALSE
YLPM1	NP_062535.2	0	0	0	1	-4.065	-4.856	FALSE	FALSE	FALSE	FALSE	FALSE	FALSE	FALSE	FALSE	FALSE	FALSE
YTHDF2	NP_001166299.1	0	0	0	1		-4.936	FALSE	FALSE	FALSE	FALSE	FALSE	FALSE	FALSE	FALSE	FALSE	FALSE
ZBTB1	NP_001116801.1	0	0	0	1	-3.71	-4.7305	FALSE	FALSE	FALSE	FALSE	FALSE	FALSE	FALSE	FALSE	FALSE	FALSE
ZBTB14	NP_001137295.1	0	0	0	2	-4.249	-4.9555	FALSE	FALSE	FALSE	FALSE	FALSE	FALSE	FALSE	FALSE	FALSE	FALSE
ZBTB18	NP_991331.1	0	0	1	0	-4.8765	-5.0915	TRUE	FALSE	TRUE	FALSE	FALSE	FALSE	TRUE	TRUE	TRUE	TRUE
ZBTB2	NP_065912.1	0	0	1	1	-3.66	-5.0585	FALSE	FALSE	FALSE	FALSE	FALSE	FALSE	FALSE	FALSE	FALSE	FALSE
ZBTB38	NP_001073881.2	0	0	0	1	-3.53	-4.7225	FALSE	FALSE	FALSE	FALSE	FALSE	FALSE	FALSE	FALSE	FALSE	FALSE
ZBTB46	NP_079500.2	0	0	1	0	-2.5525	-5.4525	FALSE	FALSE	FALSE	FALSE	FALSE	FALSE	FALSE	FALSE	FALSE	FALSE
ZBTB7B	NP_001239335.1	0	0	0	1	-3.6175	-4.7005	FALSE	FALSE	FALSE	FALSE	FALSE	FALSE	FALSE	FALSE	FALSE	FALSE
ZC3H11A	NP_001306167.1	0	0	0	1	-3.658	-4.728	FALSE	FALSE	FALSE	FALSE	FALSE	FALSE	FALSE	FALSE	FALSE	FALSE
ZC3H14	NP_079100.2	0	0	0	2	-3.4635	-4.9095	FALSE	FALSE	FALSE	FALSE	FALSE	FALSE	FALSE	FALSE	FALSE	FALSE
ZC3H7A	NP_054872.2	0	0	0	1	-4.437	-4.674	FALSE	FALSE	FALSE	FALSE	FALSE	FALSE	FALSE	FALSE	FALSE	FALSE
ZCCHC4	NP_079212.2	0	0	0	2		-4.8355	FALSE	FALSE	FALSE	FALSE	FALSE	FALSE	FALSE	FALSE	FALSE	FALSE
ZDHHC15	NP_659406.1	0	0	1	0	-4.892	-5.122	FALSE	FALSE	FALSE	FALSE	FALSE	FALSE	TRUE	FALSE	FALSE	TRUE
ZDHHC8	NP_037505.1	0	0	0	1		-4.684	FALSE	FALSE	FALSE	FALSE	FALSE	FALSE	FALSE	FALSE	FALSE	FALSE
ZFP36L1	NP_004917.2	0	0	1	0	-3.2235	-5.229	FALSE	FALSE	FALSE	FALSE	FALSE	FALSE	FALSE	FALSE	FALSE	FALSE
ZFR	NP_057191.2	0	0	0	2	-4.199	-4.6625	FALSE	FALSE	FALSE	FALSE	FALSE	FALSE	FALSE	FALSE	FALSE	FALSE
ZFTRAF1	NP_001317547.1	0	0	0	11	-4.961	-4.8865	FALSE	FALSE	FALSE	FALSE	FALSE	FALSE	FALSE	FALSE	FALSE	FALSE
ZFYVE9	NP_004790.2	0	0	0	1	-5.1905	-4.66	FALSE	FALSE	FALSE	FALSE	FALSE	FALSE	FALSE	FALSE	FALSE	FALSE
ZIC3	NP_003404.1	0	0	0	1		-4.901	FALSE	FALSE	FALSE	FALSE	FALSE	FALSE	TRUE	FALSE	FALSE	TRUE
ZMIZ1	NP_065071.1	0	0	0	1	-4.014	-4.741	FALSE	FALSE	FALSE	FALSE	FALSE	FALSE	TRUE	FALSE	FALSE	TRUE
ZMYM2	NP_001177894.1	0	0	0	1	-4.841	-4.9685	FALSE	FALSE	FALSE	FALSE	FALSE	FALSE	TRUE	FALSE	FALSE	TRUE
ZMYM3	NP_963893.1	0	0	0	1	-5.951	-4.993	FALSE	TRUE	TRUE	FALSE	FALSE	FALSE	FALSE	FALSE	FALSE	FALSE
ZNF10	NP_056209.2	0	0	0	1		-4.764	FALSE	FALSE	FALSE	FALSE	FALSE	FALSE	FALSE	FALSE	FALSE	FALSE
ZNF12	NP_057349.2	0	0	0	1		-4.815	FALSE	FALSE	FALSE	FALSE	FALSE	FALSE	FALSE	FALSE	FALSE	FALSE
ZNF14	NP_066358.2	0	0	0	1	-3.1755	-4.705	FALSE	FALSE	FALSE	FALSE	FALSE	FALSE	FALSE	FALSE	FALSE	FALSE
ZNF148	NP_068799.2	0	0	1	1	-5.436	-5.8635	FALSE	FALSE	FALSE	FALSE	FALSE	FALSE	TRUE	TRUE	FALSE	TRUE
ZNF157	NP_003437.2	0	0	0	2		-4.8715	FALSE	FALSE	FALSE	FALSE	FALSE	FALSE	FALSE	FALSE	FALSE	FALSE
ZNF160	NP_001096073.1	0	0	0	1		-4.883	FALSE	FALSE	FALSE	FALSE	FALSE	FALSE	FALSE	FALSE	FALSE	FALSE
ZNF189	NP_003443.2	0	0	0	1		-4.7285	FALSE	FALSE	FALSE	FALSE	FALSE	FALSE	FALSE	FALSE	FALSE	FALSE
ZNF208	NP_009084.2	0	0	1	0	-2.525	-5.2925	FALSE	FALSE	FALSE	FALSE	FALSE	FALSE	FALSE	FALSE	FALSE	FALSE
ZNF217	NP_006517.1	0	0	1	0	-3.563	-5.822	FALSE	FALSE	FALSE	FALSE	FALSE	FALSE	FALSE	FALSE	FALSE	FALSE
ZNF235	NP_004225.3	0	0	0	1	-3.3295	-4.7005	FALSE	FALSE	FALSE	FALSE	FALSE	FALSE	FALSE	FALSE	FALSE	FALSE
ZNF250	NP_066405.1	0	0	0	1	-3.415	-4.618	FALSE	FALSE	FALSE	FALSE	FALSE	FALSE	FALSE	FALSE	FALSE	FALSE
ZNF251	NP_612376.1	0	0	0	1	-3.0585	-4.6725	FALSE	FALSE	FALSE	FALSE	FALSE	FALSE	FALSE	FALSE	FALSE	FALSE
ZNF283	NP_862828.1	0	0	0	1		-4.9095	FALSE	FALSE	FALSE	FALSE	FALSE	FALSE	FALSE	FALSE	FALSE	FALSE
ZNF287	NP_065704.2	0	0	0	1	-3.3765	-4.653	FALSE	FALSE	FALSE	FALSE	FALSE	FALSE	FALSE	FALSE	FALSE	FALSE
ZNF300	NP_001166302.1	0	0	0	1		-4.8265	FALSE	FALSE	FALSE	FALSE	FALSE	FALSE	FALSE	FALSE	FALSE	FALSE
ZNF304	NP_065708.2	0	0	0	1	-3.2365	-4.8355	FALSE	FALSE	FALSE	FALSE	FALSE	FALSE	FALSE	FALSE	FALSE	FALSE
ZNF34	NP_085057.3	0	0	0	3		-4.905	FALSE	FALSE	FALSE	FALSE	FALSE	FALSE	FALSE	FALSE	FALSE	FALSE
ZNF354A	NP_005640.2	0	0	0	2		-4.9045	FALSE	FALSE	FALSE	FALSE	FALSE	FALSE	FALSE	FALSE	FALSE	FALSE
ZNF358	NP_060553.4	0	0	1	0	-4.39	-5.244	FALSE	FALSE	FALSE	FALSE	FALSE	FALSE	FALSE	FALSE	FALSE	FALSE
ZNF407	NP_060227.2	0	0	0	4	-3.212	-4.865	FALSE	FALSE	FALSE	FALSE	FALSE	FALSE	TRUE	FALSE	FALSE	TRUE
ZNF43	NP_003414.2	0	0	0	1	-3.2765	-4.803	FALSE	FALSE	FALSE	FALSE	FALSE	FALSE	FALSE	FALSE	FALSE	FALSE
ZNF493	NP_001070146.1	0	0	0	22	-3.0255	-4.66	FALSE	FALSE	FALSE	FALSE	FALSE	FALSE	FALSE	FALSE	FALSE	FALSE
ZNF521	NP_056276.1	0	0	0	1	-3.965	-4.6625	FALSE	FALSE	FALSE	FALSE	FALSE	FALSE	FALSE	FALSE	FALSE	FALSE
ZNF536	NP_055532.1	0	0	0	1	-4.6495	-4.642	FALSE	FALSE	FALSE	FALSE	FALSE	FALSE	FALSE	FALSE	FALSE	FALSE
ZNF566	NP_001138815.1	0	0	0	1		-4.6185	FALSE	FALSE	FALSE	FALSE	FALSE	FALSE	FALSE	FALSE	FALSE	FALSE
ZNF618	NP_001304971.1	0	0	0	1	-3.483	-4.882	FALSE	FALSE	FALSE	FALSE	FALSE	FALSE	FALSE	FALSE	FALSE	FALSE
ZNF630	NP_001032824.2	0	0	0	1	-3.507	-4.698	FALSE	FALSE	FALSE	FALSE	FALSE	FALSE	FALSE	FALSE	FALSE	FALSE
ZNF654	NP_001337063.1	0	0	0	1		-4.733	FALSE	FALSE	FALSE	FALSE	FALSE	FALSE	FALSE	FALSE	FALSE	FALSE
ZNF670	NP_149990.1	0	0	0	1	-3.2855	-4.6215	FALSE	FALSE	FALSE	FALSE	FALSE	FALSE	FALSE	FALSE	FALSE	FALSE
ZNF674	NP_001034980.1	0	0	0	1		-4.836	FALSE	FALSE	FALSE	FALSE	FALSE	FALSE	FALSE	FALSE	FALSE	FALSE
ZNF709	NP_689814.1	0	0	0	1		-4.634	FALSE	FALSE	FALSE	FALSE	FALSE	FALSE	FALSE	FALSE	FALSE	FALSE
ZNF711	NP_068838.3	0	0	0	1	-4.5715	-4.8405	FALSE	FALSE	FALSE	FALSE	FALSE	FALSE	TRUE	FALSE	FALSE	TRUE
ZNF761	NP_001276880.1	0	0	1	1		-5.123	FALSE	FALSE	FALSE	FALSE	FALSE	FALSE	FALSE	FALSE	FALSE	FALSE
ZNF81	NP_009068.2	0	0	0	2		-4.786	FALSE	FALSE	FALSE	FALSE	FALSE	FALSE	FALSE	FALSE	FALSE	FALSE
ZNF829	NP_001165450.1	0	0	0	12		-4.7445	FALSE	FALSE	FALSE	FALSE	FALSE	FALSE	FALSE	FALSE	FALSE	FALSE
ZRSR2	NP_005080.1	0	0	0	1	-3.7365	-4.9985	FALSE	FALSE	FALSE	FALSE	FALSE	FALSE	FALSE	FALSE	FALSE	FALSE
ZSCAN23	NP_001012458.1	0	0	0	6		-4.7735	FALSE	FALSE	FALSE	FALSE	FALSE	FALSE	FALSE	FALSE	FALSE	FALSE
ZSWIM8	NP_001229417.1	0	0	0	1	-4.182	-4.782	FALSE	FALSE	FALSE	FALSE	FALSE	FALSE	FALSE	FALSE	FALSE	FALSE
ZXDB	NP_009088.1	0	0	0	1	-3.4885	-4.6345	FALSE	FALSE	FALSE	FALSE	FALSE	FALSE	FALSE	FALSE	FALSE	FALSE
ZYG11B	NP_078922.1	0	0	0	1		-4.9905	FALSE	FALSE	FALSE	FALSE	FALSE	FALSE	FALSE	FALSE	FALSE	FALSE
