# Supplementary material for: Deep generative modeling of the human proteome reveals over a hundred novel genes involved in rare genetic disorders
Source: Research Square preprint supplement (doi:10.21203/rs.3.rs-3740259/v1), 2024-01-03
Supplement: Supplementary file 2 [file 2087bd7eaca5d716815842e8.xlsx]

## Sheet: Key
Column	Description
cohort	Cases (from Kaplanis et al 2020) or controls (from Zhou et al 2022)
subject_id	ID for individual subjects taken directly from the above references
chrom	Chromosome
pos	GRCh37 position
ref	Reference allele
alt	Alternate allele
gene	Gene symbol
protein	Stable RefSeq protein id
ensembl_protein	Ensembl protein id (from dbNSFP4.4a)
mutant	Wildtype amino acid, protein position and substitution amino acid
ap_test_set	Denotes if the subject was included in the test set for Fig 2d
gap_freq	Frequency of gaps at this column in the multiple sequence alignment
popEVE	popEVE score (negative is more pathogenic)
popped_ESM1v	population-adjusted ESM1v score (negative is more pathogenic)
popped_EVE	population-adjusted EVE score (negative is more pathogenic)
EVE	EVE evolutionary index (positive is more pathogenic)
ESM1v	ESM1v ensemble mean (negative is more pathogenic)
SIFT	SIFT score (negative is more pathogenic, from dbNSFP4.4a)
FATHMM	FATHMM score (positive is more pathogenic, from dbNSFP4.4a)
VEST4	VEST4 score (positive is more pathogenic, from dbNSFP4.4a)
REVEL	REVEL score (positive is more pathogenic, from dbNSFP4.4a)
PrimateAI	PrimateAI score (positive is more pathogenic, from dbNSFP4.4a)
BayesDel	BayesDel score (positive is more pathogenic, from dbNSFP4.4a)
ClinPred	ClinPred score (positive is more pathogenic, from dbNSFP4.4a)
CADD	CADD phred score (positive is more pathogenic, from dbNSFP4.4a)
AlphaMissense	AlphaMissense score (positive is more pathogenic)

## Sheet: SuppTable02
cohort	subject_id	chrom	pos	ref	alt	gene	protein	ensembl_protein	mutant	ap_test_set	gap_freq	popEVE	popped_ESM1v	popped_EVE	EVE	ESM1v	SIFT	FATHMM	VEST4	REVEL	PrimateAI	BayesDel	ClinPred	CADD	AlphaMissense
control	005-09-110647	11	823778	G	A	PNPLA2	NP_065109.1	ENSP00000337701	S281N	TRUE	0.319	-2.712	-2.705	-2.719	1.30713	-1.11126	0.455	-1.29	0.102	0.242	0.444355	-0.240173	0.0793542	2.635	0.0618
control	006-09-110648	15	68623359	C	T	ITGA11	NP_001004439.1	ENSP00000327290	D621N	TRUE	0	-3.935	-3.906	-3.964	12.7322	-8.16924	0	-2.61	0.984	0.829	0.630579	0.0971762	0.999159	28.8	0.8883
control	00HI1315A	10	94392347	T	G	KIF11	NP_004514.2	ENSP00000260731	I533M	TRUE	0.004	-3.387	-3.558	-3.216	1.14294	-1.10552	0.073	-0.18	0.055	0.119	0.330222	-0.225855	0.0736688	18.58	0.0726
control	00HI1315A	11	92715203	C	T	MTNR1B	NP_005950.1	ENSP00000257068	L272F	TRUE	0.052	-3.1975	-3.101	-3.294	6.38702	-5.36703	0.028	0.99	0.263	0.253	0.476063	-0.108961	0.47607	20.4	0.215
control	00HI1315A	4	57269533	G	C	PPAT	NP_002694.3	ENSP00000264220	S146C	TRUE	0.022	-3.8275	-3.797	-3.858	5.79974	-4.71688	0.001	-1.36	0.604	0.884	0.76467	0.384684	0.999633	27.6	0.3205
control	015-07-107616	22	39219114	C	T	NPTXR	NP_055108.2	ENSP00000327545	G418R	TRUE	0.036	-3.845	-3.845		8.90314	-7.64074	0.001	3.21	0.981	0.43	0.765445	0.251825	0.997578	27.8	0.9928
control	01C05701	1	3328479	C	T	PRDM16	NP_071397.3	ENSP00000270722	A573V	TRUE	0.176	-2.988	-3.142	-2.834	1.49902	-1.20227	0.931	3.52	0.144	0.029	0.34692	-0.508332	0.0117001	4.879	0.0757
control	01C05701	21	15753730	T	C	HSPA13	NP_008879.3	ENSP00000285667	K54E	TRUE	0.023	-2.8835	-3.044	-2.723	-1.37079	0.611268	0.187	5.45	0.186	0.159	0.466374	-0.269573	0.767131	22.4	0.0681
control	01C06631	9	377190	A	G	DOCK8	NP_982272.2	ENSP00000394888	M807V	TRUE	0.486119	-3.14	-2.803	-3.477	8.22	1.27512			0.603	0.109	0.48335	0.0266915	0.355595	20.4	0.0872
control	02C11077	2	190531844	G	T	ASNSD1	NP_061921.2	ENSP00000260952	G329V	TRUE	0.004	-4.461	-5.187	-3.735	9.39087	-12.3416	0	-4.47	0.979	0.94	0.567017	0.584416	0.999874	27.4	0.9319
control	039-06-105576	13	26625094	G	A	SHISA2	NP_001007539.1	ENSP00000313079	S7L	TRUE	0.966	-2.778	-2.73	-2.826	0.508301	-0.783981	0.052	0.94	0.065	0.102	0.740776	-0.31003	0.0584097	16.94	0.1311
control	039-06-105576	17	18881334	G	A	FAM83G	NP_001035088.2	ENSP00000373647	P549S	TRUE	0.682381	-3.133	-3.145	-3.121	6.085	-0.901367	0.259	2.79	0.109	0.014	0.234253	-0.365059	0.154249	1.393	0.0735
control	040-06-105578	18	5290931	C	T	ZBTB14	NP_001137295.1	ENSP00000349503	E426K	TRUE	0.264	-3.742	-3.867	-3.617	3.78601	-1.90779	0.023	2.93	0.709	0.276	0.793904	-0.0120782	0.668744	22.8	0.3151
control	047-07-107703	1	35370741	C	T	DLGAP3	NP_001073887.1	ENSP00000362444	V82I	TRUE	0.348	-2.985	-3.136	-2.834	0.756592	-2.14284	0.45	1.78	0.208	0.097	0.511986	-0.240647	0.105874	12.91	0.0753
control	047-07-107703	2	43519291	G	C	THADA	NP_071348.3	ENSP00000386088	T1630S	TRUE	0.38	-2.686	-2.686			0.731018	0.844	2.99	0.349	0.039	0.399707	-0.256304	0.174783	15.64	0.0976
control	04HI3554A	3	64184571	C	A	PRICKLE2	NP_942559.1	ENSP00000492363	K11N	TRUE	0.368	-3.528	-3.333	-3.723	7.24835	-4.69347					0.767407	-0.0439259	0.894617	25.6	0.8728
control	04HI3554A	6	158449979	G	A	SYNJ2	NP_003889.1	ENSP00000347792	D136N	TRUE	0.271	-3.123	-3.17	-3.076	0.800049	-0.804972	0.21	0.21	0.263	0.118	0.342678	-0.34848	0.104443	17.77	0.0768
control	05C45659	1	46159449	C	T	TMEM69	NP_057570.2	ENSP00000361095	H206Y	TRUE	0.0214656	-3.384	-3.233	-3.535	5.433	0.204751	0.129		0.201	0.074	0.322037	-0.109481	0.858442	21	0.1037
control	05C46547	14	45584061	A	G	PRPF39	NP_060392.3	ENSP00000348010	Y652C	TRUE	0.502	-3.965	-3.619	-4.311	8.38611	-5.6004	0.012	0.71	0.682	0.396	0.878059	0.159712	0.87392	29.7	0.187
control	05HI4260A	9	125827679	C	G	RABGAP1	NP_036329.3	ENSP00000362751	A616G	TRUE	0.0522193	-3.504	-3.751	-3.257	6.062	-7.142	0.02	3.75	0.592	0.219	0.857414	-0.0922958	0.981502	23.5	0.7433
control	05HI4260A	X	105168862	G	A	NRK	NP_940867.2	ENSP00000434830	G1051S	FALSE	0.351281	-3.509	-3.487	-3.531	3.613	0.108168	0.138	-1.2	0.1	0.111	0.254157	-0.19048	0.055926	7.131	0.0755
control	08C72238	3	38793750	G	A	SCN10A	NP_006505.4	ENSP00000390600	P572L	TRUE	0.373222	-2.959	-3.014	-2.904	3.056	-0.00575919	0.309	-3.67	0.108	0.242	0.250225	-0.322293	0.0194706	1.316	0.0504
control	08C72341	5	114878691	T	C	FEM1C	NP_064562.1	ENSP00000274457	Y167C	TRUE	0.115	-4.254	-4.459	-4.049	8.5285	-4.70915	0.001	-0.21	0.765	0.397	0.932158	0.132554	0.981208	31	0.6095
control	08C72341	7	99097362	C	T	ZNF394	NP_115540.2	ENSP00000337363	E119K	TRUE	0.911	-3.4105	-3.173	-3.648	6.93591	-2.22822	0.007	3.22	0.544	0.134	0.588223	-0.13436	0.945695	25.8	0.3041
control	08C73778	1	151400428	C	G	POGZ	NP_055915.2	ENSP00000271715	V317L	TRUE	0.166	-3.2805	-3.263	-3.298	2.75208	0.0194105	0.388	5.77	0.402	0.205	0.788512	-0.125903	0.446213	19.12	0.4078
control	08C73778	1	54432030	C	T	LRRC42	NP_001243338.1	ENSP00000360421	P330L	TRUE	0.113	-3.0425	-2.943	-3.142	3.37988	0.91441	0.052		0.174	0.057	0.317036	-0.20007	0.545798	19.3	0.0871
control	08C73959	10	101371064	G	A	SLC25A28	NP_112489.3	ENSP00000359526	R213W	TRUE	0.0104388	-3.913	-3.937	-3.889	5.622	-5.85812	0.01	-1.36	0.531	0.661	0.697986	0.332692	0.972983	25.2	0.1444
control	08C74504	11	102206811	A	T	BIRC3	NP_001156.1	ENSP00000263464	D480V	TRUE	0.581	-3.4465	-3.343	-3.55	5.29846	-3.20743	0.003	1.95	0.605	0.108	0.248231	-0.156004	0.924178	22.9	0.0905
control	08C78799	12	53460123	G	A	SPRYD3	NP_116229.1	ENSP00000301463	P390L	TRUE	0.807986	-3.195	-3.165	-3.225	4.149	0.796813	0.32		0.265	0.05	0.446509	-0.150205	0.041546	15.98	0.0702
control	09C100464	17	38857495	A	G	KRT24	NP_061889.2	ENSP00000264651	L251P	TRUE	0.003	-4.1175	-3.83	-4.405	11.7497	-9.64308	0	-2.91	0.963	0.91	0.666473	0.490511	0.989664	27.6	0.9319
control	09C83540	17	71431622	C	T	SDK2	NP_001138424.1	ENSP00000376421	E388K	TRUE	0.184304	-3.352	-3.154	-3.55	11.176	-1.35253	0.005	-0.2	0.913	0.427	0.641337	0.224747	0.971108	27.1	0.4343
control	09C84011	2	37306410	G	A	HEATR5B	NP_061897.1	ENSP00000233099	P64L	TRUE	0.195	-3.041	-3.041		5.69482	0.107482	0.017	-0.36	0.854	0.533	0.869996	0.278331	0.990626	26.6	0.3432
control	09C84011	2	44209383	G	A	LRPPRC	NP_573566.2	ENSP00000260665	R114C	TRUE	0.112	-3.52	-3.573	-3.467	6.53357	-2.61124	0.005	0.22	0.234	0.201	0.24654	-0.167625	0.913359	20.8	0.1027
control	09C84012	19	3119051	G	T	GNA11	NP_002058.2	ENSP00000078429	E245D	TRUE	0.042	-3.0995	-3.153	-3.046	2.42728	-3.37347	0.247	-2.43	0.327	0.313	0.815071	-0.0697274	0.359149	32	0.8347
control	09C85772	17	53798136	A	G	TMEM100	NP_060756.2	ENSP00000395328	L99S	TRUE	0.005	-3.8425	-4.092	-3.593	5.24228	-6.84858	0.001		0.836	0.592	0.614966	0.449482	0.999128	27.7	0.5988
control	09C90388	11	1718687	G	C	KRTAP5-6	NP_001012416.1	ENSP00000371595	G71A	TRUE	0.007	-3.0835	-2.808	-3.359	5.68094	-6.409		2.99	0.274	0.095		-0.217211	0.326273	10.08	0.1236
control	09C95787	4	42022452	A	T	SLC30A9	NP_006336.3	ENSP00000264451	K118N	TRUE	0.763	-3.5045	-3.227	-3.782	6.7677	-2.72936	0.003	0.38	0.588	0.155	0.877074	-0.00608003	0.977717	27.4	0.8878
control	09C95787	4	89345805	C	T	HERC6	NP_060382.3	ENSP00000264346	S629L	TRUE	0.0497063	-2.1725	-3.02	-1.325	-7.087	0.583624	0.706	-0.74	0.066	0.1	0.27311	-0.472918	0.0148416	0.092	0.0627
control	09C95787	5	141046050	G	A	ARAP3	NP_071926.4	ENSP00000239440	P838L	TRUE	0.259577	-3.0865	-3.402	-2.771	1.405	-1.90158	0.237	1.48	0.326	0.089	0.615264	-0.370746	0.0617091	22.3	0.1053
control	1-0153-003A	21	47693456	G	A	MCM3AP	NP_003897.2	ENSP00000291688	A681V	TRUE	0.03	-3.351	-3.183	-3.519	7.5249	-0.218467	0	1.77	0.838	0.44	0.764172	0.150844	0.999612	25.7	0.9842
control	1-0153-003A	3	136192475	C	T	STAG1	NP_005853.2	ENSP00000372689	G344E	TRUE	0.057	-4.8495	-5.074	-4.625	7.91089	-6.92429	0.007	1.64	0.805	0.519	0.931539	0.245098	0.987973	26.7	0.9971
control	1-0153-003A	4	41956121	C	T	TMEM33	NP_060596.2	ENSP00000422473	H217Y	TRUE	0.137	-3.401	-3.438	-3.364	-0.264587	-1.13555	0.049		0.577	0.185	0.745939	0.156591	0.904561	21	0.1388
control	1-0224-003	9	990631	G	A	DMRT3	NP_067063.1	ENSP00000190165	V349I	TRUE	0.099	-2.756	-2.609	-2.903	4.24689	-0.72675	0.145	1.69	0.097	0.147	0.415758	-0.299912	0.796006	16.94	0.0885
control	1-0278-004A	1	156503808	G	A	IQGAP3	NP_839943.3	ENSP00000354451	T1289M	TRUE	0.0479549	-3.2775	-3.244	-3.311	5.986	-0.0311303	0.067	0.48	0.577	0.264	0.607392	-0.137186	0.980214	23.6	0.0975
control	1-0291-004A	16	26147127	C	T	HS3ST4	NP_006031.2	ENSP00000330606	T310I	TRUE	0.0367615	-3.3665	-3.234	-3.499	6.562	-6.74931	0.007	0.38	0.464	0.297	0.86738	-0.00574378	0.993779	25.3	0.8256
control	1-0291-004A	18	57106979	C	T	CCBE1	NP_597716.1	ENSP00000404464	R282Q	TRUE	0.053	-3.069	-2.823	-3.315	6.20132	-4.4977	0.143	-3.37	0.696	0.526	0.705569	-0.0397698	0.185124	28.4	0.1925
control	1-0291-005	12	50867289	C	A	LARP4	NP_443111.4	ENSP00000381490	S546Y	TRUE	0.31745	-3.4835	-3.297	-3.67	7.017	-3.98131	0.033	0.93	0.191	0.095	0.329227	-0.19462	0.504943	21.6	0.0869
control	1-0299-005	X	49099588	C	T	CCDC22	NP_054727.1	ENSP00000365401	S158L	FALSE	0.273	-3.321	-3.193	-3.449	2.32684	0.292546	0.008		0.307	0.126	0.44034	-0.320548	0.224182	20.4	0.0846
control	1-0389-005	10	13656081	G	A	PRPF18	NP_003666.1	ENSP00000367835	V263M	TRUE	0.0500263	-4.0745	-4.119	-4.03	6.995	-4.78413	0.006		0.69	0.299	0.916236	0.260131	0.979783	28.3	0.974
control	1-0441-004	11	64681324	G	T	ATG2A	NP_055919.2	ENSP00000366475	R187S	TRUE	0.135	-3.097	-3.097		-1.34375	-0.0568027	0.505	0.59	0.145	0.071	0.22978	-0.259375	0.0860627	16.52	0.1147
control	1-0488-004	19	50958400	C	T	MYBPC2	NP_004524.3	ENSP00000350332	R684C	TRUE	0.019	-3.276	-3.056	-3.496	9.87756	-3.15184	0	0.36	0.814	0.374	0.625607	-0.0971292	0.807783	29.3	0.7424
control	1-0488-004	7	87912230	C	T	STEAP4	NP_078912.2	ENSP00000369419	R237H	TRUE	0.002	-3.2095	-3.089	-3.33	3.32501	-3.581	0.074	3.24	0.387	0.162	0.286885	-0.276372	0.363112	24.1	0.1225
control	1-0488-004	X	118533548	G	A	SLC25A43	NP_660348.2	ENSP00000217909	R61Q	FALSE	0.058	-3.5355	-3.504	-3.567	2.09454	-0.803316	0.202	-1.3	0.07	0.077	0.842992	-0.276309	0.170936	16.54	0.0741
control	1-0509-004	11	68514791	G	A	TESMIN	NP_004914.2	ENSP00000255087	P172L	TRUE	0.129	-3.103	-3.191	-3.015	2.65088	0.349878	0.175	1.59	0.066	0.016	0.243368	-0.468482	0.0119881	0.945	0.0665
control	1-0526-004	5	142661479	T	C	NR3C1	NP_001018087.1	ENSP00000343205	K770R	TRUE	0.091	-3.581	-3.557	-3.605	3.51477	-1.81478	0.04	-3.75	0.4	0.657	0.595058	0.0924064	0.465386	24.3	0.0853
control	1-0539-004	6	134495936	T	C	SGK1	NP_005618.2	ENSP00000237305	K4E	TRUE	0.972255	-3.285	-2.668	-3.902	5.798	0.00924001	0.029	-0.62	0.586	0.22		-0.0647898	0.14604	19	0.1214
control	1-0552-004	14	56757017	G	A	PELI2	NP_067078.1	ENSP00000267460	G180D	TRUE	0.015	-3.244	-3.287	-3.201	3.0473	-7.06035	0.141	0.86	0.916	0.499	0.916324	0.211475	0.992411	25	0.7503
control	1-0611-005	17	38189607	A	C	MED24	NP_001254726.1	ENSP00000348610	L208R	TRUE	0.085	-3.96	-4.319	-3.601	5.328	-2.44427		0.39	0.532	0.327	0.504057	0.250188	0.81341	23.1	0.1606
control	1-0616-005	16	87723269	C	T	JPH3	NP_065706.2	ENSP00000284262	P435S	TRUE	0.176	-2.7755	-2.617	-2.934	5.10413	-0.146814	0.008	0.93	0.867	0.196	0.539495	0.0826308	0.921139	21.6	0.1354
control	1-0616-005	6	31939425	C	T	DXO	NP_005501.2	ENSP00000337759	A10T	TRUE	0.875	-3.002	-3.28	-2.724	-1.53131	-1.80292	0.043	2.21	0.074	0.063	0.339829	-0.236236	0.355923	9.7	0.0683
control	1-0616-005	7	149561353	G	A	ZNF862	NP_001092690.1	ENSP00000223210	E1164K	TRUE	0.506	-3.164	-3.095	-3.233	3.64478	-0.695134	0.064	5.23	0.044	0.064	0.302724	-0.329122	0.0476992	9.439	0.0823
control	1-0677-005A	19	19042389	C	T	HOMER3	NP_001139194.1	ENSP00000446026	G246S	TRUE	0.228	-2.708	-2.944	-2.472	-1.56512	-0.489705	0.833	2.53	0.067	0.024	0.352498	-0.512012	0.019319	1.04	0.0634
control	1-0695-004	15	64449015	T	C	PPIB	NP_000933.1	ENSP00000300026	D146G	TRUE	0.004	-3.2545	-3.23	-3.279	4.81323	-4.72399	0.018	1.2	0.878	0.513	0.887456	0.202125	0.993244	31	0.7683
control	1-0700-006A	12	53468979	G	A	SPRYD3	NP_116229.1	ENSP00000301463	R91W	TRUE	0.0543755	-3.9345	-4.017	-3.852	9.431	-6.20589	0.015	0.17	0.72	0.362	0.874528	0.218059	0.972435	29.4	0.9448
control	1-0862-004	4	99997690	G	C	ADH5	NP_000662.3	ENSP00000296412	S193C	TRUE	0.001	-3.1795	-2.971	-3.388	7.9209	-4.27648	0.011	1.83	0.772	0.398	0.599794	0.144473	0.996733	26.7	0.1662
control	1-0912-004	1	154115999	T	G	NUP210L	NP_001152956.1	ENSP00000271854	E132A	TRUE	0.119874	-3.9195	-3.687	-4.152	9.92	-1.15306	0.009	3.15	0.418	0.149	0.556456	-0.108469	0.985434	25.7	0.2648
control	1-1010-004A	19	10624690	C	G	S1PR5	NP_001159687.1	ENSP00000416915	S333T	TRUE	0.235	-2.6525	-2.583	-2.722	0.888	-1.16856	0.157	1.09	0.066	0.018	0.406712	-0.410488	0.0366493	2.954	0.0693
control	1-1015-004A	11	2981052	C	G	NAP1L4	NP_005960.1	ENSP00000369915	D232H	TRUE	0.198	-4.0175	-4.151	-3.884	7.5929	-8.77073	0.023	0.79	0.645	0.444	0.742827	0.120269	0.99743	25.5	0.7395
control	1-1040-004	6	87994468	T	C	GJB7	NP_940970.1	ENSP00000435355	S55G	TRUE	0.024	-3.347	-3.382	-3.312	5.48752	-4.70202	0	-5.43	0.089	0.397	0.282941	0.113975	0.225526	17.05	0.1149
control	10-1118-004	11	32976924	G	A	QSER1	NP_001070254.2	ENSP00000496900	R1528Q	TRUE	0.0642857	-3.796	-3.381	-4.211	8.195	-0.154825					0.603646	0.00784824	0.967852	26.3
control	10-1118-004	1	155175069	C	T	THBS3	NP_009043.1	ENSP00000357362	A109T	TRUE	0.7	-2.9765	-3.043	-2.91	-1.51843	0.237714	0.485	4.54	0.133	0.038	0.575323	-0.359313	0.146266	15.5	0.0993
control	10-1120-004A	8	119122741	T	C	EXT1	NP_000118.2	ENSP00000367446	H182R	TRUE	0.18	-2.7085	-2.754	-2.663	-0.102112	-1.27566	0.161	-4.38	0.431	0.447	0.851201	0.148745	0.84405	22.9	0.0722
control	10-1155-005	1	157718402	G	A	FCRL2	NP_110391.2	ENSP00000355157	S467F	TRUE	0.499604	-3.26		-3.26	6.269		0.082	2.13	0.307	0.035	0.335529	-0.207829	0.275918	19.1	0.115
SDD	100016	1	154991112	C	T	DCST2	NP_653223.2	ENSP00000357409	A744T	FALSE	0.944277	-2.337	-2.856	-1.818	-1.941	-0.144547	0.051	1.88	0.046	0.064	0.289124	-0.384295	0.0762017	0.291	0.0734
SDD	100027	15	41794376	G	T	ITPKA	NP_002211.1	ENSP00000260386	G329C	FALSE	0.001	-4.5945	-4.674	-4.515	8.98279	-10.0337	0	0.08	0.932	0.703	0.862842	0.382757	0.999818	33	0.9692
SDD	100040	22	41277879	C	T	XPNPEP3	NP_071381.1	ENSP00000349658	T96I	TRUE	0.071	-2.86	-3.021	-2.699	-0.730652	-1.47594	0.661	-0.9	0.372	0.336	0.416306	-0.123396	0.108373	17.46	0.1426
SDD	100071	4	170991741	G	C	AADAT	NP_001273611.1	ENSP00000423190	N243K	FALSE	0.0120098	-3.1765	-2.868	-3.485	4.357	-1.22652	0.592	-2.63	0.151	0.216	0.284655	-0.226866	0.0509099	17.61	0.1642
SDD	100071	5	155771633	A	G	SGCD	NP_000328.2	ENSP00000338343	I46M	FALSE	0.227	-2.929	-2.989	-2.869	2.74658	-2.54844	0.46	-3.57	0.569	0.417	0.865783	0.0802861	0.610792	10.61	0.3611
SDD	100078	4	128851875	C	T	MFSD8	NP_689991.1	ENSP00000296468	V321I	TRUE	0.021	-2.6725	-2.708	-2.637	0.10965	0.330866	0.283	-1.33	0.19	0.139	0.342029	-0.269358	0.0258881	9.326	0.0757
SDD	100087	11	773523	G	C	GATD1	NP_872418.1	ENSP00000321691	S118R	FALSE	0.0202404	-2.1945	-2.051	-2.338	2.368	-1.07285	0.092	-1.35	0.315	0.354	0.479084	0.0218413	0.189929	18.65	0.1658
SDD	100087	15	42457265	T	C	VPS39	NP_056104.2	ENSP00000326534	N609S	FALSE	0.042	-3.7785	-3.41	-4.147	7.85645	-3.23154	0	0.72	0.815	0.39	0.519894	-0.00940285	0.992206	26.5	0.1812
SDD	100098	1	226253478	C	T	H3-3A	NP_002098.1	ENSP00000355780	R84C	TRUE	0.029	-4.322	-4.878	-3.766	3.24576	-8.24362		-0.97	0.832	0.764	0.915258	0.382418	0.994111	26.4
SDD	100098	9	390528	A	T	DOCK8	NP_982272.2	ENSP00000394888	T978S	TRUE	0.108215	-2.498	-2.841	-2.155	-2.192	0.262304			0.078	0.033	0.510234	-0.268817	0.291893	15.89	0.0859
SDD	100107	7	6693854	A	G	ZNF316	NP_001265488.1	ENSP00000477706	K876R	FALSE	0.502582	-2.3175	-2.476	-2.159	1.158	1.2812			0.063			-0.292839		22.1
SDD	100123	11	67056995	C	G	ANKRD13D	NP_997237.2	ENSP00000427130	L22V	FALSE	0.322	-3.169	-2.946	-3.392	5.53223	-5.38745	0	1.46	0.353	0.054	0.816059	-0.125913	0.571336	22.2
SDD	100135	14	29237089	C	T	FOXG1	NP_005240.3	ENSP00000339004	L202F	TRUE	0.006	-5.4175	-5.657	-5.178	9.1297	-11.9495	0	-4.29	0.673	0.877	0.840867	0.328166	0.999164	26.5	0.9997
SDD	100135	4	107163642	T	A	TBCK	NP_001156908.2	ENSP00000273980	L385F	TRUE	0.015	-3.2915	-3.205	-3.378	4.25732	-3.34026	0.092	2.44	0.583	0.161	0.803249	-0.198546	0.928877	21.7	0.2127
SDD	100142	16	23570962	G	A	UBFD1	NP_061989.2	ENSP00000379217	E177K	FALSE	0.008	-3.337	-3.609	-3.065	3.98798	-6.29976	0.334		0.469	0.209	0.78985	0.187513	0.880737	23.4	0.367
SDD	100142	18	43703319	G	A	HAUS1	NP_612452.1	ENSP00000282058	A219T	FALSE	0.08	-2.901	-3.137	-2.665	1.94226	-0.513328	0.179		0.127	0.047	0.383195	-0.180278	0.225498	17.03	0.0791
SDD	100145	10	135013892	G	T	KNDC1	NP_689856.6	ENSP00000304437	A973S	FALSE	0.07	-2.947	-2.947			-0.458148	0.619	2.81	0.094	0.05	0.312801	-0.364836	0.17223	0.172	0.0792
SDD	100145	19	40486286	C	T	PSMC4	NP_006494.1	ENSP00000157812	R338C	FALSE	0.0916037	-4.3315	-4.269	-4.394	6.949	-10.6239	0	-3.61	0.625	0.782	0.851765	0.378317	0.999383	29.6	0.9863
SDD	100164	19	13910723	G	A	ZSWIM4	NP_075560.2	ENSP00000254323	V115M	FALSE	0.938	-3.538	-3.642	-3.434	7.13794	-5.03121	0.02	0.34	0.704	0.299	0.885677	0.0331666	0.948718	26.9	0.9102
SDD	100180	17	49124778	G	A	SPAG9	NP_001124000.1	ENSP00000262013	S183L	FALSE	0.409	-3.3495	-3.453	-3.246	2.1394	-0.839948	0.183	1.89	0.121	0.115	0.526703	-0.229231	0.459682	23	0.078
SDD	100180	18	76752368	C	G	SALL3	NP_741996.2	ENSP00000441823	P126R	FALSE	0.114	-2.408	-2.973	-1.843	-0.413818	-0.791287	0.373	3.05	0.114	0.073	0.615213	-0.318511	0.119673	9.528	0.0995
SDD	100180	1	11115024	G	A	SRM	NP_003123.2	ENSP00000366156	R295C	FALSE	0.252	-3.908	-3.578	-4.238	7.41632	-4.69041	0.002	-1.18	0.699	0.621	0.566374	0.129774	0.992008	27.4	0.3203
SDD	100193	19	49993491	C	T	RPL13A	NP_036555.1	ENSP00000375730	R31W	TRUE	0.071	-2.7015	-3.206	-2.197	2.81433	-6.21371	0.003		0.533	0.211		-0.00555322	0.78196	25.7	0.6617
SDD	100193	5	45303786	T	A	HCN1	NP_066550.2	ENSP00000307342	K511N	TRUE	0.001	-4.315	-4.132	-4.498	7.70483	-9.5516	0.001	-3.09	0.803	0.667	0.917947	0.152745	0.993946	25.1	0.9936
SDD	100199	11	1862300	A	G	TNNI2	NP_003273.1	ENSP00000371336	K106E	FALSE	0.18	-3.632	-3.618	-3.646	6.55186	-2.5306	0.001	-3.54	0.651	0.876	0.79317	0.309756	0.982369	24.9	0.9938
SDD	100199	3	21462907	C	A	ZNF385D	NP_078973.1	ENSP00000281523	K329N	FALSE	0.089	-3.3485	-3.223	-3.474	6.39142	-5.04292	0.001	1.19	0.563	0.075	0.687239	-0.188956	0.983574	23	0.6034
SDD	10019	11	113078607	G	A	NCAM1	NP_001229536.1	ENSP00000480132	D267N	FALSE	0.0616352	-2.888	-2.695	-3.081	4.823	-1.83272			0.182		0.432852	-0.295695	0.255959	21.2
SDD	10019	14	74433709	C	A	ENTPD5	NP_001308917.1	ENSP00000335246	K403N	FALSE	0.153	-3.6885	-3.655	-3.722	5.2821	-6.45641	0.002	2.67	0.655	0.198	0.704356	-0.17704	0.987049	24.9	0.9651
SDD	10019	5	77711350	C	T	SCAMP1	NP_004857.4	ENSP00000481022	P48S	FALSE	0.279249	-2.9645	-2.861	-3.068	2.924	-0.625424			0.282		0.565481	0.132123		21.4	0.0638
SDD	100216	12	66773196	C	G	GRIP1	NP_066973.2	ENSP00000381098	G777R	FALSE	0.116	-3.371	-3.198	-3.544	5.05884	-1.32611	0.046	-1.28	0.589	0.585	0.661786	0.157937	0.953868	24.2	0.5906
SDD	100234	11	64000061	G	A	DNAJC4	NP_001294909.1	ENSP00000320548	D114N	FALSE	0.089	-3.198	-3.178	-3.218	2.12811	1.08892	0.54	1.86	0.219	0.013	0.297426	-0.296382	0.120579	5.599	0.0839
SDD	100239	9	127572552	G	A	OLFML2A	NP_872293.2	ENSP00000362682	G607D	FALSE	0.027	-2.793	-2.847	-2.739	-0.338745	-2.5563	0.215	1.02	0.114	0.157	0.460551	-0.0128921	0.572846	21.3	0.1151
SDD	100242	11	77911805	G	A	USP35	NP_065849.1	ENSP00000431876	R383Q	TRUE	0.031	-2.9135	-2.85	-2.977	2.71143	-0.614275	0.488	-0.22	0.445	0.113	0.387126	-0.124238	0.0632535	22.7	0.48
SDD	100242	2	241725908	C	T	KIF1A	NP_004312.2	ENSP00000497030	C151Y	TRUE	0.333	-5.127	-5.154	-5.1	13.7921	-12.4009					0.913696	0.432847	0.999248	26.7	0.9994
SDD	100242	7	11418747	C	G	THSD7A	NP_056019.1	ENSP00000406482	S1584T	TRUE	0.332	-2.867	-3.005	-2.729	1.08496	-0.289724	0.877	0.33	0.191	0.094	0.282475	-0.311808	0.0450053	11.94	0.0735
SDD	100249	8	62479776	G	T	ASPH	NP_004309.2	ENSP00000368767	D417E	TRUE	0	-3.242	-3.102	-3.382	3.979	-1.45145	0.213	1.45	0.387	0.068	0.547921	-0.201919	0.679553	17.12	0.2633
SDD	10024	3	138289177	C	T	CEP70	NP_001307527.1	ENSP00000264982	E150K	FALSE	0.155	-3.4885	-3.295	-3.682	3.69739	-0.667341	0.017	1.29	0.258	0.13	0.505962	-0.0505005	0.94447	26.1	0.1554
SDD	100277	22	30977346	G	A	PES1	NP_055118.1	ENSP00000346725	A266V	FALSE	0.068	-3.005	-2.856	-3.154	5.20801	-1.97818	0.395	0.94	0.718	0.197	0.53764	-0.119041	0.319779	22.8	0.2409
SDD	100292	14	63246582	G	A	KCNH5	NP_647479.2	ENSP00000321427	A628V	TRUE	0.03	-3.4195	-3.248	-3.591	4.44507	-6.6439	0.041	-3.35	0.916	0.811	0.855327	0.444821	0.929825	23.6	0.8078
SDD	100295	10	18266837	A	T	SLC39A12	NP_001138667.1	ENSP00000366586	D253V	FALSE	0.403	-3.3495	-3.371	-3.328	5.49939	-3.96415	0.005	0.16	0.493	0.247	0.382409	0.10203	0.981194	24.1	0.2094
SDD	100326	6	26157049	C	T	H1-4	NP_005312.1	ENSP00000307705	A144V	TRUE	0.241	-1.215	-1.044	-1.386	4.08292	-3.92316	0.248	1.94	0.144	0.054	0.272492	-0.428001	0.0705499	16.73	0.1253
SDD	100341	15	41859690	C	A	TYRO3	NP_006284.2	ENSP00000263798	P306T	FALSE	0.039	-3.3675	-3.366	-3.369	0.521851	-0.978136	0.452	0.5	0.094	0.128	0.616766	-0.0775892	0.667131	19.13	0.0886
SDD	100409	11	57578958	G	T	CTNND1	NP_001078927.1	ENSP00000382004	D880Y	TRUE	0.277	-3.3945	-3.226	-3.563	2.22144	-0.237597	0.005	-0.28	0.612	0.266	0.645872	0.196569	0.698558	35	0.1808
SDD	100409	12	117691489	C	T	NOS1	NP_000611.1	ENSP00000320758	D868N	TRUE	0.058	-3.1975	-3.317	-3.078	1.96851	-0.219438	0.205	0.34	0.066	0.039	0.38894	-0.351126	0.487234	21.2	0.0747
SDD	100413	12	52775183	G	A	KRT84	NP_149034.2	ENSP00000257951	R347C	TRUE	0.004	-3.0155	-2.861	-3.17	4.79419	-4.78176	0.034	-1.19	0.437	0.551	0.412136	-0.0167084	0.981368	28.3	0.1011
SDD	100413	1	205238334	T	C	TMCC2	NP_055673.2	ENSP00000350718	V335A	TRUE	0	-3.465	-3.198	-3.732	9.08472	-8.54059	0.147	0.74	0.818	0.465	0.858726	0.148904	0.983615	28.5	0.9669
SDD	100413	8	120807859	C	G	TAF2	NP_003175.2	ENSP00000367406	W368C	TRUE	0.054	-4.429	-4.582	-4.276	7.76819	-5.19659	0	2.38	0.988	0.747	0.910194	0.248761	0.999594	29.6	0.9997
SDD	100419	20	36676850	T	C	RPRD1B	NP_067038.1	ENSP00000362532	S128P	FALSE	0.035225	-3.721	-4.08	-3.362	3.557	-3.85228	0.072	0.98	0.551	0.099	0.703455	-0.0590279	0.595131	23	0.7886
SDD	100422	5	169291321	G	A	INSYN2B	NP_001123363.1	ENSP00000366582	R522W	FALSE	0.105	-3.8625	-4.142	-3.583	6.26172	-3.17563	0.001	0.8	0.391	0.194	0.628756	-0.161966	0.392146	26.7	0.3547
SDD	10042	1	249106137	C	A	SH3BP5L	NP_085148.1	ENSP00000355428	A382S	FALSE	0.796	-2.497	-2.779	-2.215	-2.59229	0.335504	0.763		0.055	0.018	0.594203	-0.29295	0.0140455	2.359	0.0617
SDD	100430	12	88900900	G	T	KITLG	NP_000890.1	ENSP00000495951	P207T	TRUE	0.164	-3.3205	-3.421	-3.22	1.46695	0.00306268					0.25202	-0.198565	0.0607676	0.119	0.0512
SDD	100430	2	239181758	C	T	PER2	NP_073728.1	ENSP00000254657	V175M	TRUE	0.047	-3.264	-3.264			-1.11979	0.174	2.73	0.186	0.049	0.237434	-0.431543	0.0712045	0.824	0.0719
SDD	100433	6	44201251	C	T	SLC29A1	NP_001071645.1	ENSP00000360789	R453W	FALSE	0.271	-3.7635	-3.479	-4.048	11.0075	-6.31348	0.002	-0.24	0.579	0.4	0.527503	-0.0664421	0.98594	26	0.3928
SDD	100448	15	79292217	T	A	RASGRF1	NP_002882.3	ENSP00000405963	T888S	FALSE	0.622	-3.33	-3.21	-3.45	2.15088	0.892718	0.25	-0.05	0.303	0.04	0.50859	-0.157728	0.110303	17.88	0.0748
SDD	100448	4	140196447	T	C	MGARP	NP_116012.2	ENSP00000381928	Y61C	FALSE	0.0494186	-4.2415	-4.417	-4.066	10.304	-4.81751	0.003	0.83	0.813	0.335	0.567593	0.225709	0.944904	27.8	0.5634
SDD	100459	X	20153870	T	C	EIF1AX	NP_001403.1	ENSP00000368927	K64E	FALSE	0.01	-5.967	-6.265	-5.669	8.04935	-12.1034	0.003	-0.18	0.827	0.506	0.893142	0.205443	0.990329	26.6	0.9868
SDD	100479	12	116420341	G	C	MED13L	NP_056150.1	ENSP00000281928	P1675A	TRUE	0.084596	-3.8605	-3.765	-3.956	8.604	-0.477051	0.005	-0.97	0.59	0.646	0.587064	0.189049	0.981916	26.2	0.4222
SDD	100479	17	59668132	A	G	NACA2	NP_954984.1	ENSP00000427802	L137P	TRUE	0.019	-3.4325	-3.598	-3.267	3.00351	-8.32226	0.128	0.86	0.485	0.203	0.528853	-0.137911	0.992612	22.3	0.1687
SDD	100486	2	44047187	G	A	ABCG5	NP_071881.1	ENSP00000384513	L506F	FALSE	0.2957	-3.0895	-3.048	-3.131	5.177	-3.77275				0.352	0.362335	-0.101159	0.819729	22.9	0.2842
SDD	100486	3	120169548	C	T	FSTL1	NP_009016.1	ENSP00000295633	A16T	FALSE	0.37	-3.2675	-3.052	-3.483	0.0820923	-0.990139	0.336	2.5	0.34	0.08	0.743997	-0.300388	0.315512	23.7	0.1382
SDD	100499	19	47768195	G	A	CCDC9	NP_056418.1	ENSP00000221922	E238K	FALSE	0.01	-3.1165	-3.187	-3.046	5.20264	-5.7034	0.006	0.82	0.692	0.193	0.848452	-0.121859	0.508098	29.9	0.2744
SDD	10049	11	66103520	G	A	RIN1	NP_004283.2	ENSP00000310406	R66W	FALSE	0.279	-3.3485	-3.323	-3.374	7.64319	-3.83436	0.023	0.96	0.523	0.079	0.851376	-0.109059	0.719213	23.8	0.1539
SDD	1004	19	19650577	G	T	CILP2	NP_694953.2	ENSP00000291495	D52Y	FALSE	0.618	-3.0715	-3.134	-3.009	2.94189	-1.43097	0.031	0.65	0.321	0.082	0.608558	-0.0961373	0.231449	22	0.1773
SDD	100502	1	180904675	G	A	KIAA1614	NP_066001.1	ENSP00000356560	D544N	FALSE	0.180055	-2.74	-3.108	-2.372	2.137	-0.921017	0.375	2.55	0.068	0.007	0.593902	-0.547391	0.0237361	0.128	0.0909
SDD	100502	3	131388527	G	A	CPNE4	NP_001276041.1	ENSP00000478878	R243W	FALSE	0.035	-3.7605	-3.766	-3.755	4.80481	-3.07672			0.75		0.792736	-0.0821481	0.578229	25.1	0.2147
SDD	100503	1	26488398	G	T	FAM110D	NP_079145.2	ENSP00000363386	G206W	FALSE	0.02	-3.328	-3.328			-1.97673	0.004	0.89	0.248	0.073	0.890074	-0.180794	0.475786	23.7	0.1607
SDD	100503	3	101572707	C	T	NFKBIZ	NP_113607.1	ENSP00000325663	T446M	FALSE	0	-3.94	-4.096	-3.784	5.37378	-9.22797	0.004	0.91	0.925	0.574	0.732393	0.228012	0.925452	32	0.9217
SDD	100506	22	21345975	C	T	LZTR1	NP_006758.2	ENSP00000496779	R284C	TRUE	0.632	-3.2275	-3.227	-3.228	3.82056	-10.288					0.910253	0.437801	0.999471	29	0.9923
SDD	100538	10	93786382	A	C	BTAF1	NP_003963.1	ENSP00000265990	L1703F	FALSE	0.125	-4.5645	-4.633	-4.496	10.7261	-4.54013	0.004	-2.05	0.905	0.835	0.898822	0.361191	0.992693	24.5	0.853
SDD	100558	21	45053218	C	G	HSF2BP	NP_008962.1	ENSP00000291560	A126P	FALSE	0.049	-4.157	-4.392	-3.922	8.65906	-9.95864	0.026		0.859	0.239	0.519233	0.163018	0.943968	23.2	0.9273
SDD	100558	8	41615630	C	T	ANK1	NP_000028.3	ENSP00000289734	R18K	FALSE	0.137	-3.4115	-3.226	-3.597	7.86157	-0.0951655	0.029	-0.07	0.351	0.081	0.81912	-0.10167	0.871053	22.7	0.9515
SDD	100562	5	38407005	C	T	EGFLAM	NP_001192230.1	ENSP00000346964	P302S	FALSE	0.27	-2.513	-2.804	-2.222	-0.27478	0.0821966	0.25	0.98	0.133	0.062	0.259961	-0.136696	0.154948	7.291	0.0775
SDD	100565	3	159943742	G	C	C3orf80	NP_001161686.1	ENSP00000313324	R107P	FALSE	0.0639269	-3.219	-2.907	-3.531	6.408	-0.762771	0	2.17	0.537	0.298		-0.00500166	0.986478	27.7	0.7669
SDD	100565	5	16465473	G	T	ZNF622	NP_219482.1	ENSP00000310042	A101E	FALSE	0.722	-3.354	-3.108	-3.6	9.08594	0.474654	0.532		0.569	0.225	0.4204	0.187474	0.972198	27.3	0.1485
SDD	100568	18	25565678	C	A	CDH2	NP_001783.2	ENSP00000269141	D597Y	TRUE	0.018	-4.981	-5.318	-4.644	13.0022	-13.2429	0	-0.29	0.955	0.667	0.834208	0.389859	0.999823	27.4	0.9938
SDD	100571	14	24546559	G	A	CPNE6	NP_001267487.1	ENSP00000440077	R554Q	FALSE	0.121	-4.142	-4.083	-4.201	6.50452	-6.10034	0.01	1.98	0.986	0.495	0.636994	0.23464	0.998144	31	0.9036
SDD	100576	4	1806153	C	A	FGFR3	NP_001156685.1	ENSP00000339824	A393E	TRUE	0.012	-3.309	-3.615	-3.003	4.95215	-8.52103	0.017	-1.88	0.702	0.716	0.470921	0.291533	0.842192	22.5	0.7857
SDD	100581	10	50532305	C	T	C10orf71	NP_001128668.1	ENSP00000363259	P572L	FALSE	0.004	-2.8445	-3.053	-2.636	2.36719	0.260405	0.062	3.7	0.144	0.089		-0.306457	0.147342	6.159	0.0783
SDD	100602	9	139935337	G	C	NPDC1	NP_056207.3	ENSP00000360660	P162R	FALSE	0.014	-2.974	-2.933	-3.015	4.73456	-0.983034	0.678		0.116	0.033	0.499202	-0.209343	0.050119	16.9	0.0764
SDD	100607	11	36248677	T	C	LDLRAD3	NP_777562.1	ENSP00000318607	L166P	FALSE	0.004	-3.1725	-3.078	-3.267	5.31525	-6.43737	0.001	-3.33	0.825	0.841	0.790811	0.486957	0.951906	26.1	0.4619
SDD	100623	17	66416599	G	A	ARSG	NP_055775.2	ENSP00000407193	A525T	FALSE	1	-2.1695	-3.047	-1.292	-30.7998	-0.396438		-3.73	0.051	0.098	0.2487	-0.207336	0.0564936	0.082	0.0731
SDD	100623	3	164907329	A	C	SLITRK3	NP_001305739.1	ENSP00000420091	N430K	FALSE	0	-3.6175	-3.673	-3.562	5.60254	-5.62292	0.069	0.59	0.638	0.226	0.881679	-0.119059	0.811008	24.5	0.9807
SDD	100632	2	166019092	T	C	SCN3A	NP_008853.3	ENSP00000283254	N314S	TRUE	0.358835	-3.033	-3.171	-2.895	0.794	-0.0138061	0.306	-3.87	0.398	0.373	0.366804	0.0222221	0.386829	20.6	0.0886
SDD	100632	X	153668425	G	C	GDI1	NP_001484.1	ENSP00000394071	D176H	FALSE	0.019	-4.2115	-4.034	-4.389	6.22595	-6.63653	0.002	0.31	0.667	0.473	0.893298	0.320323	0.988073	27.1	0.731
SDD	100646	7	29923831	T	C	WIPF3	NP_001073998.2	ENSP00000242140	S241P	FALSE	0.564	-2.883	-2.853	-2.913	1.28461	1.38657	0.146	0.78	0.046	0.043	0.816819	-0.603686	0.034371	7.909	0.069
SDD	100662	12	10774497	G	T	STYK1	NP_060893.2	ENSP00000075503	P348T	TRUE	0.033	-3.782	-3.869	-3.695	7.98566	-8.08952	0	-2.11	0.78	0.792	0.552092	0.160941	0.996427	25.4	0.8177
SDD	100662	19	5131947	G	A	KDM4B	NP_055830.1	ENSP00000159111	R612H	TRUE	-1	-3.018	-3.018			-2.05224	0.028	0.76	0.68	0.352	0.77757	0.0291685	0.99414	29.5	0.8276
SDD	100667	10	117308978	T	C	ATRNL1	NP_997186.1	ENSP00000347152	S1243P	FALSE	0.334	-3.753	-3.637	-3.869	8.89429	-3.05119	0.099	0.72	0.814	0.473	0.842375	0.250929	0.978609	28.2	0.9961
SDD	100682	11	64669996	C	T	ATG2A	NP_055919.2	ENSP00000366475	G1257S	FALSE	0.061	-3.046	-3.046		5.13916	0.545475	0.723	3.33	0.572	0.148	0.76114	-0.324922	0.296613	22.6	0.4367
SDD	100723	10	104165148	C	T	PSD	NP_001257894.1	ENSP00000384830	G761R	FALSE	0.027	-4.25	-4.472	-4.028	12.0269	-9.28759	0	-1.04	0.944	0.897	0.818923	0.42118	0.998201	28.2	0.979
SDD	100727	16	88600492	G	A	ZFPM1	NP_722520.2	ENSP00000326630	R709H	FALSE	0.151	-2.9895	-2.928	-3.051	8.1261	-4.41466	0.002	1.73	0.099	0.103	0.912272	-0.137244	0.979157	28.4	0.9818
SDD	100731	19	41703746	C	T	CYP2S1	NP_085125.1	ENSP00000308032	R136W	FALSE	0.0817775	-3.987	-4.014	-3.96	8.575	-7.14704	0	4.96	0.85	0.271	0.512622	0.07152	0.996883	23.9	0.2394
SDD	100743	17	67114069	C	T	ABCA6	NP_525023.2	ENSP00000284425	G489R	TRUE	0.055	-3.337	-3.337			-0.81754	0.29	-2.32	0.172	0.228	0.334277	-0.0224282	0.310391	15.4	0.1056
SDD	100743	1	38003387	C	T	SNIP1	NP_078976.2	ENSP00000296215	E385K	TRUE	0.703	-3.283	-3.168	-3.398	5.75452	-2.37735	0.084	0.87	0.243	0.187	0.453702	-0.225127	0.62321	23.2	0.15
SDD	100788	2	175957855	C	G	ATF2	NP_001243019.1	ENSP00000264110	R373S	FALSE	0.053	-5.2995	-5.679	-4.92	12.9541	-15.1587	0	0.42	0.923	0.494	0.883603	0.30009	0.994083	24.1	0.9999
SDD	100788	9	117188546	C	T	WHRN	NP_056219.3	ENSP00000354623	E371K	FALSE	0.0913174	-3.243	-3.293	-3.193	7.002	-9.70473	0.048	2.28	0.29	0.14	0.500761	-0.135836	0.798434	22.1	0.1015
SDD	100809	2	166245462	T	C	SCN2A	NP_066287.2	ENSP00000283256	W1716R	TRUE	0.16	-7.238	-7.238		9.76587	-14.5717	0	-4.57	0.984	0.963	0.93303	0.562751	0.99996	29.4	0.9999
SDD	100812	16	49313431	C	T	CBLN1	NP_004343.1	ENSP00000219197	G156R	TRUE	0.01	-4.1395	-4.313	-3.966	5.68362	-9.69503	0.004	-0.98	0.713	0.721	0.906386	0.355415	0.990149	29.6	0.9929
SDD	100812	2	166243515	T	C	SCN2A	NP_066287.2	ENSP00000283256	L1604P	TRUE	0.132	-6.797	-6.797		8.75	-13.5633	0	-3.93	0.981	0.979	0.941541	0.545356	0.999137	31	0.9977
SDD	100822	20	6025261	A	G	LRRN4	NP_689824.2	ENSP00000368135	F309S	FALSE	0.011	-3.2455	-3.183	-3.308	5.74622	-2.42716	0.018	0.61	0.605	0.203	0.484137	0.0302433	0.902993	19.04	0.2081
SDD	100829	4	57843019	C	G	NOA1	NP_115689.1	ENSP00000264230	V245L	FALSE	0.055	-3.2815	-3.331	-3.232	4.95032	-4.11051	0.205	2.76	0.487	0.086	0.748535	-0.189215	0.940845	23.7	0.24
SDD	100834	2	216298065	T	A	FN1	NP_001293061.2	ENSP00000394423	I133L	TRUE	0.035	-3.392	-3.126	-3.658	5.78333	-0.0842997	0.02	0.93	0.521	0.19	0.840467	0.00847689	0.907898	29.9	0.6835
SDD	100837	15	64443984	G	T	SNX22	NP_079074.2	ENSP00000323435	V4F	FALSE	0.364	-3.604	-3.581	-3.627	7.44934	-3.32329	0	-1.68	0.503	0.733	0.89892	0.113375	0.985027	25.4	0.8109
SDD	100837	1	223943227	A	C	CAPN2	NP_001139540.1	ENSP00000413158	E316A	FALSE	0.225811	-2.925	-3.034	-2.816	1.758	-1.56925	0.542	-2.37	0.477	0.3	0.633612	0.0117085	0.709325	22.5	0.0861
SDD	100843	15	77324645	G	A	PSTPIP1	NP_003969.2	ENSP00000452746	E250K	FALSE	0.021	-3.5715	-3.446	-3.697	8.5069	-8.3575	0.003	0.81	0.902		0.656846	0.268929	0.988351	29.4	0.8014
SDD	100844	7	150764058	G	A	SLC4A2	NP_001186621.1	ENSP00000419412	R315Q	FALSE	0.268	-3.007	-3.082	-2.932	1.65942	-0.85739	0.278	-0.83	0.282	0.214	0.680548	-0.0710121	0.33454	23	0.0985
SDD	100861	X	16855807	A	T	TXLNG	NP_060830.2	ENSP00000369465	K384M	FALSE	0.049	-4.543	-4.392	-4.694	10.0918	-10.084	0.001	1.2	0.554	0.576	0.804077	0.129537	0.997869	33	0.7392
SDD	100867	17	36667024	C	T	ARHGAP23	NP_001186346.1	ENSP00000481862	P1431L	FALSE	0.604895	-3.0445	-3.02	-3.069	5.39	-1.30994			0.106		0.819132	-0.296571	0.0427802	5.417	0.0792
SDD	100906	X	62926208	C	T	ARHGEF9	NP_056000.1	ENSP00000253401	R104Q	FALSE	0.112	-5.0045	-5.034	-4.975	7.74719	-8.5091	0.001	-0.85	0.944	0.799	0.833321	0.500618	0.999811	26	0.9958
SDD	100907	7	89936386	C	A	CFAP69	NP_001034795.2	ENSP00000373948	Q813K	FALSE	0.099	-3.37	-3.137	-3.603	4.68799	0.444598	0.245	2.55	0.24	0.057		-0.161654	0.601369	17.49	0.0764
SDD	100913	1	160326850	T	G	NCSTN	NP_056146.1	ENSP00000294785	V605G	FALSE	0.115	-4.008	-4.108	-3.908	7.80188	-6.904	0.001	-1.21	0.637	0.499	0.496711	0.374303	0.960908	24.7	0.4506
SDD	100967	15	67473701	A	T	SMAD3	NP_005893.1	ENSP00000332973	T261S	TRUE	-1	-3.8415	-3.388	-4.295	8.52154	-6.33392	0.001	-5.25	0.816	0.974	0.872937	0.41439	0.984224	25.6	0.9716
SDD	10096	16	85838570	C	T	COX4I1	NP_001852.1	ENSP00000253452	S34L	FALSE	0.073	-3.015	-2.621	-3.409	6.03082	-2.00821	0.027	0.19	0.39	0.174	0.287174	-0.204082	0.2158	17.09	0.1551
SDD	100975	13	112722573	G	A	SOX1	NP_005977.2	ENSP00000330218	A201T	FALSE	0.223	-3.069	-2.95	-3.188	7.15198	-5.33712	0.047	-4.3	0.341	0.597	0.925427	0.192805	0.953229	24.2	0.5555
SDD	10099	15	31664338	C	T	KLF13	NP_057079.2	ENSP00000302456	R235C	FALSE	0.012	-3.219	-3.441	-2.997	4.60938	-5.36288	0	3.17	0.701	0.279	0.930844	0.194555	0.989175	28	0.7846
SDD	101013	12	120784005	G	A	MSI1	NP_002433.1	ENSP00000257552	S327L	TRUE	0.897	-3.9495	-3.768	-4.131	7.38446	-9.01041	0.001	1.7	0.798	0.294	0.80349	0.141854	0.989827	31	0.3249
SDD	101013	19	50435819	A	G	ATF5	NP_036200.2	ENSP00000470633	K107E	TRUE	0.566	-2.9715	-2.817	-3.126	1.01459	0.995637		0.88	0.215		0.786714	-0.0977449	0.281377	19.57	0.5182
SDD	101018	19	49422329	C	T	NUCB1	NP_006175.2	ENSP00000385923	R287W	FALSE	0.033	-3.142	-3.123	-3.161	4.61884	-4.66029	0.182	-1.81	0.624	0.41	0.605555	0.033752	0.984893	24.8	0.3433
SDD	101029	16	75665145	C	T	KARS1	NP_001123561.1	ENSP00000325448	R448H	TRUE	0.041	-3.083	-3.083			-4.33212	0.306	-1.26	0.84	0.402	0.579703	0.109805	0.278995	23.6	0.1746
SDD	101032	X	24228845	C	G	ZFX	NP_001317256.1	ENSP00000368486	N629K	FALSE	0.016	-5.158	-5.266	-5.05	7.24939	-11.4488			0.709	0.176	0.920905	-0.230937	0.989949	23.8	0.9904
SDD	10103	4	108999432	C	T	LEF1	NP_057353.1	ENSP00000265165	V318I	FALSE	0.008	-2.945	-3.219	-2.671	0.164978	-0.940928	0.254	-4.67	0.222	0.518	0.78941	0.0526509	0.645047	23.4	0.5534
SDD	101047	1	40124833	C	T	NT5C1A	NP_115915.1	ENSP00000235628	R356Q	FALSE	0.587	-2.742	-2.824	-2.66	0.669983	-1.54051	0.259		0.183	0.047	0.225587	-0.454125	0.0382574	13.49	0.0768
SDD	101050	1	173735346	A	C	KLHL20	NP_055273.2	ENSP00000209884	S405R	FALSE	0.025	-3.788	-3.709	-3.867	5.26471	-3.77845	0.004	-1.29	0.835	0.705	0.892518	0.361368	0.963686	27.1	0.9997
SDD	101050	1	38265826	G	A	MANEAL	NP_001106954.1	ENSP00000362136	R442H	FALSE	0.0842199	-3.2525	-3.368	-3.137	4.984	-4.78674	0.026		0.186	0.265	0.578863	0.20612	0.969212	23.7	0.1437
SDD	101050	2	190557010	C	A	ANKAR	NP_653309.3	ENSP00000427882	P357T	FALSE	0.07	-3.5565	-3.356	-3.757	6.55957	0.0355426	0	1.56	0.544	0.304	0.680304	0.0494131	0.989486	24.3	0.8789
SDD	101050	5	5436552	G	A	ICE1	NP_056140.1	ENSP00000296564	A36T	FALSE	0.409	-3.024	-3.024		9.39673	0.351684	0	2.41	0.689	0.164	0.786868	-0.272038	0.55758	29.4	0.8199
SDD	101059	15	50494806	G	T	SLC27A2	NP_003636.2	ENSP00000267842	A271S	TRUE	0.001	-3.2	-3.2			-4.19278	0.012	0.89	0.571	0.261	0.399993	-0.0661686	0.970769	26.3	0.1573
SDD	101059	19	42474557	C	T	ATP1A3	NP_689509.1	ENSP00000498113	D801N	TRUE	0.045	-4.5065	-4.654	-4.359	7.2373	-9.00788					0.910182	0.191965	0.994426	29.2	0.9872
SDD	10106	1	79383723	T	C	ADGRL4	NP_071442.2	ENSP00000359778	I492V	FALSE	0.003	-2.956	-3.196	-2.716	0.760864	-1.44762	0.485	1.01	0.138	0.039	0.397419	-0.192253	0.0637391	15.37	0.0561
SDD	101070	9	130286119	G	A	NIBAN2	NP_073744.2	ENSP00000362409	T143M	FALSE	0.131	-3.067	-2.894	-3.24	5.62561	-2.71588	0.176	2.04	0.129	0.083	0.349548	-0.436333	0.205004	23.6	0.0802
SDD	10107	8	134060095	C	G	SLA	NP_006739.2	ENSP00000394049	R151T	FALSE	0.017755	-4.258	-4.202	-4.314	13.898	-12.8778	0.001	-5.69	0.974	0.965	0.690918	0.55667	0.999658	25.4	0.9998
SDD	101085	14	39502508	C	T	SEC23A	NP_006355.2	ENSP00000306881	D745N	TRUE	0.165	-3.47	-3.47		9.73291	-10.5507	0.001	-3.84	0.842	0.803	0.89154	0.15667	0.99479	28	0.9943
SDD	101109	17	42809600	C	T	DBF4B	NP_079380.2	ENSP00000377178	R175C	TRUE	0.021364	-3.9535	-4.052	-3.855	9.241	-5.8961	0.046	2.69	0.328	0.153	0.394896	-0.164576	0.934618	23.1	0.1546
SDD	101109	2	149686907	A	G	KIF5C	NP_004513.1	ENSP00000393379	K92R	TRUE	0.025	-5.3005	-5.053	-5.548	13.2399	-13.3451	0.006	-2.77	0.851	0.937	0.858635	0.457194	0.98362	28.3	0.9649
SDD	101109	9	123952916	G	A	RAB14	NP_057406.2	ENSP00000362946	T67M	TRUE	0.023	-5.274	-5.578	-4.97	9.17874	-11.2129	0	-2.33	0.859	0.918	0.859371	0.481303	0.998978	29.6	0.9956
SDD	10112	15	78882176	C	T	CHRNA5	NP_000736.2	ENSP00000299565	T148M	FALSE	0.035	-3.477	-3.27	-3.684	7.7757	-3.84172	0	-1.32	0.839	0.784	0.515663	0.342412	0.980352	25.4	0.5248
SDD	101144	4	108566062	G	A	PAPSS1	NP_005434.4	ENSP00000265174	R468C	FALSE	0.01	-4.0615	-4.242	-3.881	8.84863	-9.34796	0	0.86	0.923	0.549	0.875606	0.287584	0.999945	32	0.9816
SDD	101147	19	6743755	G	A	TRIP10	NP_001275891.1	ENSP00000320117	E184K	FALSE	0.0420561	-3.742	-4.002	-3.482	9.122	-8.70152	0.003	2.29	0.598	0.337	0.763483	0.0278819	0.962864	29.5	0.718
SDD	101157	6	30156959	A	T	TRIM26	NP_001229712.1	ENSP00000391879	L308M	FALSE	0.758	-3.6275	-3.405	-3.85	5.52173	-0.831238	0	2.95	0.28	0.096	0.515965	-0.147882	0.884742	24	0.1994
SDD	101166	2	70508809	C	T	SNRPG	NP_003087.1	ENSP00000272348	R63Q	FALSE	0.0793771	-4.066	-5.318	-2.814	2.795	-7.756	0.083	0.09	0.851	0.482	0.82604	0.295878	0.975912	17.59	0.9966
SDD	101169	7	107423474	G	C	SLC26A3	NP_000102.1	ENSP00000345873	T395S	FALSE	0	-3.159	-2.946	-3.372	6.17163	-2.42105	0.216	-3.08	0.647	0.652	0.48053	0.0904498	0.91065	24.5	0.3273
SDD	101171	14	36003780	C	G	INSM2	NP_115983.3	ENSP00000306523	P108A	FALSE	0.146	-2.863	-3.23	-2.496	-1.25037	-2.88843	0.355	0.34	0.168	0.105	0.882158	-0.150949	0.177001	21.5	0.0618
SDD	101171	3	194790704	G	A	XXYLT1	NP_689744.3	ENSP00000309640	R308C	FALSE	0.038	-3.35	-3.492	-3.208	6.03589	-7.25457	0.012	0.88	0.159	0.117	0.275955	-0.163185	0.93767	25.9	0.1127
SDD	10117	14	21827744	G	A	SUPT16H	NP_009123.1	ENSP00000216297	R734W	TRUE	0.0523056	-4.8275	-5.034	-4.621	12.149	-5.87467	0		0.737	0.413	0.873229	0.391113	0.995308	28.6	0.9721
SDD	10123	20	60704874	G	A	LSM14B	NP_653304.2	ENSP00000279068	S154N	FALSE	0.052	-3.292	-2.991	-3.593	8.2038	-2.27094	0.006	0.83	0.527	0.13	0.519005	-0.120968	0.863008	23.8	0.2564
SDD	101273	16	57687959	T	C	ADGRG1	NP_005673.3	ENSP00000456794	F228L	TRUE	0.135	-2.986	-2.701	-3.271	2.74268	1.6942	0.642	1.05	0.607		0.603211	0.113921	0.73236	22.8	0.9021
SDD	101276	11	116732977	G	T	SIK3	NP_079440.3	ENSP00000364449	Q676K	FALSE	0.003	-3.658	-3.588	-3.728	5.45337	-2.1044	0	-0.78	0.65	0.33	0.742068	0.206438	0.961647	26.9	0.2485
SDD	101279	1	205042817	G	A	CNTN2	NP_005067.1	ENSP00000330633	R1016H	FALSE	0.772	-3.016	-3.008	-3.024	1.55603	-0.64192	0.262	0.08	0.053	0.037	0.193425	-0.347735	0.0164475	10.55	0.1906
SDD	101279	1	883899	T	C	NOC2L	NP_056473.3	ENSP00000317992	N510D	FALSE	0.0415778	-2.6685	-2.635	-2.702	3.783	-3.83942	0.208	0.99	0.289	0.18	0.287858	-0.239961	0.844961	22.6	0.1318
SDD	101294	5	154396013	G	A	KIF4B	NP_001092763.1	ENSP00000387875	C865Y	FALSE	0.153	-3.322	-3.278	-3.366	4.8446	-0.450068	0.003	-0.31	0.362	0.206	0.422865	-0.0640411	0.988115	20.2	0.1238
SDD	10129	19	8491522	A	G	MARCHF2	NP_001005415.1	ENSP00000215555	E69G	FALSE	0.0667476	-3.2645	-3.115	-3.414	6.654	-4.2658	0.109	2.49	0.909	0.54	0.683159	0.187987	0.990448	26.8	0.5591
SDD	101316	2	96962398	C	G	SNRNP200	NP_054733.2	ENSP00000317123	C516S	FALSE	0.125	-3.2815	-3.493	-3.07	2.30884	0.913468	0.08	2.55	0.472	0.137	0.836616	-0.302366	0.155148	17.98	0.2691
SDD	101319	14	104407858	C	T	RD3L	NP_001244197.1	ENSP00000455434	V59M	TRUE	0.016	-3.3855	-3.479	-3.292	4.26068	-1.15413	0.1	2.34	0.071		0.324997	-0.385508		23.4	0.1172
SDD	101319	19	1235996	G	A	CBARP	NP_689982.3	ENSP00000465260	T35M	TRUE	0.214	-2.9615	-2.864	-3.059	6.11768	-3.5537			0.637			0.00972077	0.982311	32
SDD	101319	9	138660711	G	A	KCNT1	NP_065873.2	ENSP00000360822	D480N	TRUE	0.024	-3.5795	-3.458	-3.701	6.75439	-3.40323	0.003	-0.43	0.754	0.492	0.862103	-0.0461063	0.997209	31
SDD	10131	8	22059397	G	A	BMP1	NP_006120.1	ENSP00000305714	R730H	FALSE	0.201	-2.786	-2.556	-3.016	2.51935	-5.71952	0.264	-2.25	0.845	0.604	0.779774	0.144765	0.253233	23.7	0.1414
SDD	101324	9	140058246	G	A	GRIN1	NP_015566.1	ENSP00000360616	G827R	TRUE	0.13	-5.6815	-6.458	-4.905	9.95703	-15.9206	0.001	-0.77	0.954	0.791	0.89735	0.347875	0.997009	30	1
SDD	101340	12	112856920	C	T	PTPN11	NP_002825.3	ENSP00000340944	T2I	TRUE	0.981	-3.471	-3.422	-3.52	2.78223	-6.1578	0.034	2.87	0.25	0.213	0.86549	0.173056	0.88475	31	0.9335
SDD	101340	12	91449344	C	A	KERA	NP_008966.1	ENSP00000266719	V239L	TRUE	0.183103	-2.564	-2.664	-2.464	-2.428	2.97809	1	3.53	0.253	0.09	0.777095	-0.250497	0.18726	15.99	0.2798
SDD	101343	11	4144435	C	T	RRM1	NP_001024.1	ENSP00000300738	R381C	FALSE	0.005	-3.7505	-3.676	-3.825	5.60864	-4.49368	0	0.88	0.6	0.273	0.683423	-0.244937	0.945485	24.9	0.3468
SDD	101355	19	3496742	C	T	DOHH	NP_112594.1	ENSP00000398882	R24H	TRUE	0.230739	-3.6085	-3.594	-3.623	14.411	-11.0037	0		0.93	0.935	0.649557	0.480101	0.99944	25.1	0.7179
SDD	101358	9	130098500	C	T	GARNL3	NP_115669.3	ENSP00000362485	R323C	FALSE	0.044	-4.136	-4.362	-3.91	7.47754	-6.1009	0.001	-3.64	0.907	0.877	0.831157	0.253023	0.946885	32	0.8758
SDD	101376	2	39347560	G	T	SOS1	NP_005624.2	ENSP00000384675	Q2K	TRUE	0.792	-3.4895	-3.148	-3.831	6.81714	0.0588381	0.008	-1.08	0.406	0.309	0.887182	0.133496	0.952416	24.2	0.2224
SDD	101376	4	175184155	C	T	FBXO8	NP_036312.2	ENSP00000377280	S30N	TRUE	0.926898	-3.311	-3.449	-3.173	1.96	-0.518844	0.032	2.48	0.105	0.065	0.399989	-0.260494	0.619279	15.22	0.0654
SDD	101379	10	54053650	T	A	PRKG1	NP_006249.1	ENSP00000363092	I684K	FALSE	0.612	-2.426	-2.529	-2.323	-1.91309	2.22882	1	-0.13	0.362	0.235	0.543714	-0.0325512	0.632347	18.42	0.1839
SDD	101379	2	38977237	G	C	SRSF7	NP_001026854.1	ENSP00000325905	A43G	FALSE	0.012	-4.8935	-4.804	-4.983	8.36401	-9.46917	0.014	2.33	0.671	0.53	0.848862	0.0568363	0.989961	32	0.992
SDD	101382	13	25480645	C	T	CENPJ	NP_060921.3	ENSP00000371308	D511N	TRUE	-1	-3.262	-3.262			0.115017	0.033	2.12	0.123	0.088	0.31728	-0.334651	0.17966	5.153	0.0756
SDD	1013	4	128627838	C	T	INTU	NP_056508.2	ENSP00000334003	T662I	FALSE	0.043	-3.1485	-3.196	-3.101	1.91724	-1.02323	0.014		0.149	0.069	0.341589	-0.203574	0.541072	22.7	0.1181
SDD	101411	13	46619139	C	T	ZC3H13	NP_001317495.1	ENSP00000242848	V60I	FALSE	0.171	-3.221	-3.17	-3.272	3.23047	0.50113	0.301	1.08	0.192	0.021		-0.288987	0.0477068	10.75	0.0611
SDD	101411	1	15701095	G	A	FHAD1	NP_443161.1	ENSP00000351770	R1160Q	FALSE	0.0945559	-3.2705	-3.278	-3.263	3.965	-0.700031	0.157	0.16	0.167	0.201	0.314421	-0.340831	0.0827651	21.8	0.1106
SDD	101411	8	145651088	T	C	VPS28	NP_898880.1	ENSP00000366565	K58E	FALSE	0.049	-3.991	-4.186	-3.796	4.82825	-5.96015	0.002		0.713	0.885	0.727842	0.408907	0.982373	26.6	0.9866
SDD	101417	12	113266178	C	T	RPH3A	NP_001137326.1	ENSP00000374036	R19W	FALSE	0.722	-3.395	-2.96	-3.83	9.68195	-3.29972	0.001	-1.16	0.596	0.652	0.522165	0.0197174	0.910664	24.6	0.1481
SDD	101417	7	20198038	A	G	MACC1	NP_877439.3	ENSP00000383185	I649T	FALSE	0.173152	-3.456	-3.275	-3.637	5.798	-1.75174	0.128	2.78	0.667	0.236	0.48015	-0.0490469	0.988099	23.4	0.4288
SDD	101429	1	200523605	C	T	KIF14	NP_055690.1	ENSP00000356319	A1520T	TRUE	0.823171	-2.941	-3.293	-2.589	1.942	-0.0144316	0.471	-0.81	0.047	0.087	0.291974	-0.269245	0.097576	1.478	0.0772
SDD	101434	2	65248236	G	A	SLC1A4	NP_003029.2	ENSP00000234256	V519M	FALSE	0.986	-3.1945	-3.145	-3.244	3.0188	-1.68512	0.123	0.74	0.076	0.068	0.344666	-0.382403	0.0302213	13.83	0.0879
SDD	10145	9	132382384	T	C	C9orf50	NP_955382.3	ENSP00000361556	Q157R	FALSE	0.065	-2.969	-2.984	-2.954	2.8316	0.215271	0.349	2.05	0.141	0.029		-0.250597	0.0815567	14.04	0.115
SDD	101489	3	135870285	G	A	MSL2	NP_060603.2	ENSP00000311827	R480C	TRUE	0.0227273	-5.3045	-5.726	-4.883	10.194	-8.98429	0.001		0.917	0.567	0.900984	0.435237	0.99013	29.8	0.9999
SDD	101498	22	29629449	G	C	EMID1	NP_597712.2	ENSP00000335481	G302A	FALSE	0.03	-3.583	-3.632	-3.534	6.62103	-8.56094	0.003	-5.75	0.749	0.799	0.67735	0.363438	0.985531	25.1
SDD	101499	18	52921760	C	T	TCF4	NP_001077431.1	ENSP00000346440	G440S	TRUE	0.019	-3.046	-3.329	-2.763	1.9035	-5.75966	0.652	0.62	0.192	0.15	0.64625	-0.187441	0.090825	17.06	0.0686
SDD	10151	10	94353188	T	A	KIF11	NP_004514.2	ENSP00000260731	I19N	TRUE	0.07	-5.337	-5.521	-5.153	10.3205	-13.2297	0	-2.33	0.925	0.822	0.807454	0.329221	0.999501	32	0.9983
SDD	101540	10	93608173	A	G	TNKS2	NP_079511.1	ENSP00000360689	M798V	FALSE	0.183099	-3.391	-2.917	-3.865	7.287	0.322471	0.042	-0.15	0.727	0.312	0.709247	0.156672	0.92897	22.1	0.218
SDD	101540	8	146032713	C	T	ZNF517	NP_001371833.1	ENSP00000353058	H138Y	FALSE	0.143671	-2.8255	-2.858	-2.793	2.587	-2.35706	0.713	3.4	0.134	0.019	0.406915	-0.326624	0.0428438	0.03	0.1043
SDD	10154	3	119530424	T	A	NR1I2	NP_071285.1	ENSP00000336528	L163M	FALSE	0.0954055	-3.009	-2.899	-3.119	4.566	-1.47121	0.427	-3.02	0.389	0.292	0.42358	-0.0277344	0.349574	8.715	0.119
SDD	101568	17	18168047	G	C	MIEF2	NP_683684.2	ENSP00000379057	S456T	FALSE	0.095	-3.151	-3.015	-3.287	4.9353	-1.21679	0.429	2.74	0.221	0.036	0.260319	-0.301901	0.134587	4.498	0.0857
SDD	101578	5	11346613	G	C	CTNND2	NP_001323.1	ENSP00000307134	A500G	TRUE	0.025	-3.1325	-3.03	-3.235	4.01917	-0.292476	0.035	-1.27	0.383	0.413	0.670482	0.172371	0.760439	22.7	0.0868
SDD	101578	8	17513551	T	C	MTUS1	NP_001001924.1	ENSP00000262102	K977E	TRUE	0.0503817	-3.2955	-3.253	-3.338	8.462	-3.65098	0.018	1.29	0.455	0.144	0.519532	-0.00488471	0.933463	25.6	0.203
SDD	101594	19	57061469	T	G	ZFP28	NP_065879.1	ENSP00000301318	F241V	TRUE	0.746	-3.0185	-3.04	-2.997	-1.2356	0.177135	0.183	2.49	0.157	0.044	0.298609	-0.326519	0.0755726	4.828	0.1003
SDD	101594	4	77661469	C	A	SHROOM3	NP_065910.3	ENSP00000296043	H715N	TRUE	0.043	#DIV/0!			5.26294		0.16	1.59	0.231	0.061	0.325471	-0.267041	0.146517	8.879	0.1081
SDD	101599	6	33235074	C	T	VPS52	NP_072047.4	ENSP00000409952	R339H	FALSE	0.017	-3.4445	-3.266	-3.623	7.31567	-3.11518	0.004		0.211	0.145	0.571074	0.00786268	0.975584	27.2	0.5011
SDD	101619	16	9923359	G	C	GRIN2A	NP_000824.1	ENSP00000379818	A643G	TRUE	0.011	-5.287	-5.691	-4.883	8.17694	-10.8061	0	0.39	0.832	0.596	0.837589	0.298253	0.99854	28.6	0.9909
SDD	101631	16	2086988	A	C	SLC9A3R2	NP_001123484.1	ENSP00000408005	S261R	TRUE	0.354	-2.773	-2.794	-2.752	1.78461	-3.75249	0.389	2.04	0.357	0.039	0.52001	-0.193666	0.71633	22.6	0.4182
SDD	101631	1	205119867	G	T	DSTYK	NP_056190.1	ENSP00000356130	A803D	TRUE	0.12	-4.0905	-4.293	-3.888	10.6913	-9.96814	0.002	-0.12	0.833	0.526	0.863036	0.285802	0.992341	28.1	0.9937
SDD	101631	X	153629120	C	T	RPL10	NP_001243506.2	ENSP00000395025	S136L	FALSE	-1	-3.482	-3.482			-0.223262	0.02			0.186		0.16174	0.17459	10.37
SDD	101646	12	6937694	C	T	P3H3	NP_055077.2	ENSP00000478600	P30L	FALSE	0.647426	-2.987	-2.942	-3.032	4.063	-1.13242			0.141			-0.240851	0.937323	21.6
SDD	101646	1	228111919	C	T	WNT9A	NP_003386.1	ENSP00000272164	V179I	FALSE	0.002	-2.9545	-2.817	-3.092	4.3009	-2.42289	0.097	-0.97	0.481	0.29	0.766709	-0.0482283	0.346382	21.5	0.1166
SDD	101676	1	205633750	C	T	SLC45A3	NP_149093.1	ENSP00000356113	R12Q	FALSE	0.326	-2.737	-2.825	-2.649	0.0571289	-1.10839	0.354	0.84	0.068	0.071	0.453902	-0.232974	0.176525	21.6	0.0843
SDD	101686	14	45605438	G	T	FANCM	NP_065988.1	ENSP00000267430	L68F	TRUE	0.38685	-3.511	-3.6	-3.422	9.962	-1.53995	0.046	2.66	0.248	0.115	0.446835	-0.161786	0.471171	16.58	0.1408
SDD	101686	19	47249615	C	T	STRN4	NP_001034966.1	ENSP00000375777	G25S	TRUE	0.943	-2.8955	-2.956	-2.835	0.0184326	-1.5614	0.168	-0.16	0.158	0.123	0.880475	-0.117834	0.523196	18.83	0.1171
SDD	101700	1	9783320	T	G	PIK3CD	NP_005017.3	ENSP00000366563	L855R	FALSE	0.039	-5.197	-5.664	-4.73	9.92041	-14.2438	0	-2.17	0.921	0.908	0.875356	0.330112	0.993326	27.9	0.9979
SDD	101746	16	72137593	A	G	DHX38	NP_054722.2	ENSP00000268482	Y577C	FALSE	0.057	-3.265	-3.173	-3.357	5.99854	-1.57029	0.118	3.16	0.742	0.274	0.881658	0.0220606	0.986016	24.7	0.1169
SDD	101746	7	100087041	G	C	NYAP1	NP_775835.2	ENSP00000300179	S566T	FALSE	0.230653	-3.245	-3.124	-3.366	7.173	-0.465772	0.01	1.02	0.515	0.084	0.688637	-0.156435	0.902147	23.1	0.1236
SDD	101746	7	2752217	C	T	AMZ1	NP_597720.1	ENSP00000308149	A401V	FALSE	0.679	-2.2075	-2.483	-1.932	-0.172058	-0.90989	0.379	1.97	0.102	0.077	0.460958	-0.393648	0.0402485	0.001	0.0692
SDD	10174	17	16327026	G	T	TRPV2	NP_057197.2	ENSP00000342222	R290L	FALSE	0.02	-2.916	-2.899	-2.933	-0.136719	-0.503211	0.433	-0.58	0.219	0.073	0.255439	-0.11537	0.0710367	2.688	0.1385
SDD	101779	3	140281670	C	T	CLSTN2	NP_071414.2	ENSP00000402460	R744C	FALSE	0.0809628	-2.9245	-2.887	-2.962	4.169	-2.67586	0.076	1.57	0.27	0.078	0.402228	-0.325041	0.0851883	23.4	0.1654
SDD	10177	11	76873195	A	G	MYO7A	NP_000251.3	ENSP00000386331	N458S	TRUE	0.0385047	-3.669	-3.906	-3.432	5.83	-7.41587	0	-2.83	0.896	0.867	0.657026	0.0759636	0.944138	25.2	0.8708
SDD	10177	3	52876855	G	A	STIMATE-MUSTN1	NP_001185903.2	ENSP00000422941	A247V	TRUE	0.480911	-3.2185	-3.059	-3.378	7.464	-2.74846	0.121		0.613	0.091	0.712377	0.0152276	0.758371	23.4	0.255
SDD	10177	3	52876855	G	A	STIMATE	NP_940965.1	ENSP00000347195	A247V	TRUE	0.557921	-2.916	-2.806	-3.026	3.377	-2.62225	0.241		0.615	0.091	0.712377	0.0152276	0.758371	23.4	0.255
SDD	10177	4	6279274	C	G	WFS1	NP_005996.2	ENSP00000226760	A31G	TRUE	0.598	-2.5055	-2.668	-2.343	2.85583	-0.417023	0.034	-3.44	0.157	0.284	0.697768	-0.329519	0.00962418	20.4	0.0998
SDD	10177	8	121228698	A	G	COL14A1	NP_066933.1	ENSP00000297848	Y569C	TRUE	0.558	-3.7745	-3.859	-3.69	6.57983	-4.52422	0	0.12	0.894	0.648	0.740006	0.194729	0.954405	28	0.5669
SDD	101803	12	7048161	G	C	ATN1	NP_001007027.1	ENSP00000349076	R1012P	TRUE	0.0696078	-3.1725	-3.146	-3.199	5.399	-0.811237	0.002	0.76	0.702	0.378	0.690054	0.138494	0.985065	28.1	0.6728
SDD	10180	12	117672445	C	T	NOS1	NP_000611.1	ENSP00000320758	E1054K	FALSE	0.044	-3.1895	-3.377	-3.002	1.47705	-0.52977	0.292	1.46	0.588	0.11	0.568483	-0.134249	0.95801	20.9	0.1174
SDD	10180	1	118583437	G	T	SPAG17	NP_996879.1	ENSP00000337804	P1028T	FALSE	0.006	-3.4145	-3.127	-3.702	7.90283	0.876454	0.059	1.62	0.726	0.16	0.470951	0.0510943	0.837173	22	0.2854
SDD	101818	8	54742042	C	T	ATP6V1H	NP_057025.2	ENSP00000352522	V90I	FALSE	0.118891	-2.9475	-2.752	-3.143	5.378	-1.06098	0.41		0.729	0.123	0.735936	-0.0191838	0.707767	20.7	0.1262
SDD	101825	20	62679550	G	T	SOX18	NP_060889.1	ENSP00000341815	A375E	FALSE	0.374	-3.4895	-3.358	-3.621	7.92035	-6.08723	0.003	-1.6	0.791	0.737	0.924833	0.36829	0.991457	31	0.9848
SDD	101825	3	196281662	A	G	WDR53	NP_872433.1	ENSP00000328079	L166P	FALSE	0.0377358	-3.933	-3.943	-3.923	10.264	-7.79483	0.011	1.3	0.883	0.503	0.775287	0.264697	0.990312	30	0.5217
SDD	101828	6	33173230	T	G	HSD17B8	NP_055049.1	ENSP00000363794	F132V	FALSE	0.00882311	-3.468	-3.467	-3.469	6.73	-6.16603	0.002	1.82	0.828	0.543	0.597227	0.198087	0.997815	28.9	0.7823
SDD	101831	3	196089282	C	T	UBXN7	NP_056377.1	ENSP00000296328	V371I	FALSE	0.777	-3.013	-3.1	-2.926	1.63532	-1.00063	0.153		0.074	0.058	0.261383	-0.303013	0.140331	11.37	0.0664
SDD	101834	18	25589829	G	C	CDH2	NP_001783.2	ENSP00000269141	S185C	TRUE	0.163	-4.25	-4.118	-4.382	11.291	-7.26621	0.001	0.59	0.782	0.564	0.834535	0.309253	0.998472	29.7	0.973
SDD	10183	17	29195382	T	A	ATAD5	NP_079133.3	ENSP00000313171	L1089M	FALSE	0.013	-3.934	-3.838	-4.03	8.07617	-1.32275	0.025	2.18	0.192	0.065	0.422365	-0.228828	0.680148	15.29	0.0891
SDD	10189	11	100141881	G	T	CNTN5	NP_055176.1	ENSP00000435637	W741L	FALSE	0.027	-3.8845	-3.975	-3.794	8.56372	-8.4371	0	0.46	0.881	0.741	0.817515	0.326092	0.999843	31	0.7989
SDD	101912	3	113507669	G	A	ATP6V1A	NP_001681.2	ENSP00000273398	G276R	TRUE	0.005	-5.294	-5.418	-5.17	11.6309	-12.8195	0	-1.6	0.955	0.94	0.930801	0.468668	0.999866	29.8	0.9994
SDD	101912	X	144906090	A	G	SLITRK2	NP_001137475.1	ENSP00000334374	Q716R	FALSE	0.37	-3.456	-3.546	-3.366	2.04553	-0.736706	0.028	0.82		0.053	0.561118	-0.210604	0.521643	16.24	0.0967
SDD	101949	1	169292447	T	C	NME7	NP_037462.1	ENSP00000356785	I62M	FALSE	0.459	-3.431	-3.329	-3.533	8.22229	-1.30927	0.004	0.37	0.425	0.275	0.37318	-0.0583819	0.966688	22.9	0.1411
SDD	101976	20	44983876	G	A	SLC35C2	NP_001268387.1	ENSP00000318960	A167V	FALSE	-1	-2.781	-2.781			-0.609096			0.208		0.525984	-0.145898	0.087618	17.52	0.0703
SDD	101979	1	6195315	G	A	CHD5	NP_056372.1	ENSP00000262450	R949W	TRUE	0.00857272	-4.081	-3.994	-4.168	9.548	-4.9007	0	-0.97	0.73	0.654	0.935699	0.325603	0.998087	27.5	0.995
SDD	101982	1	155006119	G	A	DCST2	NP_653223.2	ENSP00000357409	A20V	FALSE	0.46988	-2.841	-2.999	-2.683	4.242	-0.985529	0.046	1.82	0.066	0.023	0.3712	-0.496156	0.029626	15.6	0.1097
SDD	101982	5	35871281	C	A	IL7R	NP_002176.2	ENSP00000306157	A168D	FALSE	0.017	-3.886	-4.067	-3.705	8.19489	-6.09685	0.014	-0.95	0.74	0.619	0.557016	0.275046	0.931629	23.8	0.8293
SDD	101992	3	50685394	A	G	MAPKAPK3	NP_004626.1	ENSP00000478922	T356A	FALSE	0.677284	-2.7425	-2.744	-2.741	1.692	-1.23865			0.18		0.626448	-0.0564229	0.36097	21.3	0.0805
SDD	102043	10	5437297	C	T	TUBAL3	NP_079079.1	ENSP00000369784	R130Q	TRUE	0.076	-2.786	-2.641	-2.931	4.09314	-4.20689	0.014	-0.7	0.53	0.677	0.391481	0.304408	0.809558	26.8	0.0991
SDD	102043	16	81953124	G	A	PLCG2	NP_002652.2	ENSP00000482457	R697Q	TRUE	0.012	-2.551	-2.952	-2.15	-0.739502	-1.09083			0.282		0.300972	-0.348472	0.0751447	14.63	0.0741
SDD	102046	3	45267377	G	A	TMEM158	NP_056259.2	ENSP00000422431	P48L	FALSE	0.443878	-2.9975	-2.724	-3.271	4.917	0.612888	0		0.131	0.065	0.891317	-0.193488	0.355037	16.01	0.2142
SDD	102058	13	84455440	T	C	SLITRK1	NP_443142.1	ENSP00000366288	N68S	FALSE	0.143	-4.388	-4.574	-4.202	7.32312	-6.61237	0	0.1	0.771	0.687	0.812545	0.0899114	0.996609	26.2	0.9395
SDD	102061	18	55319910	G	C	ATP8B1	NP_005594.2	ENSP00000497896	Q1023E	TRUE	0.263	-3.79	-3.504	-4.076	9.93066	-3.12052					0.545961	0.139036	0.987411	26.3	0.5274
SDD	102086	X	47101692	G	A	USP11	NP_001358001.1	ENSP00000366311	R464H	FALSE	-1	-3.746	-3.746			-2.29345	0.154	1.99	0.192	0.074	0.374224	-0.286558	0.612091	23.2
SDD	102094	2	168115484	G	A	XIRP2	NP_001186072.1	ENSP00000386619	G843R	FALSE	0.045	-3.095	-3.223	-2.967	3.27454	0.213566	0.292	-1	0.088	0.123		-0.255423	0.0925213	0.619
SDD	102107	16	31131564	A	G	KAT8	NP_892003.2	ENSP00000406037	Y90C	FALSE	0.491	-4.0695	-3.989	-4.15	8.3302	-7.75307	0	0.48	0.891	0.796	0.795942	0.360098	0.998931	31	0.9972
SDD	102109	12	95602973	T	C	FGD6	NP_060821.3	ENSP00000344446	Y696C	FALSE	0.005	-2.9435	-3.317	-2.57	0.740845	0.068913	0.192	-0.1	0.08	0.055	0.280274	-0.178837	0.0300127	19.92	0.0636
SDD	102139	4	1817427	G	C	LETM1	NP_036450.1	ENSP00000305653	N678K	FALSE	0.427	-3.812	-3.961	-3.663	6.57019	-8.97944	0.008		0.675	0.147	0.616895	-0.0689337	0.962701	21.4	0.5266
SDD	102141	17	47284162	T	C	GNGT2	NP_001185685.1	ENSP00000426022	D56G	TRUE	0.0119835	-3.613	-3.571	-3.655	2.71	-1.98831	0.1	2.17	0.341	0.2	0.466694	-0.0313969	0.993403	32	0.2127
SDD	102141	20	44589518	C	G	ZNF335	NP_071378.1	ENSP00000325326	K550N	TRUE	0.017	-3.1425	-2.971	-3.314	4.63489	-1.01597	0.011	2.98	0.448	0.065	0.743895	-0.21544	0.746205	26.1	0.7941
SDD	102141	2	27456376	C	G	CAD	NP_004332.2	ENSP00000264705	P1063R	TRUE	-1	-4.297	-4.203	-4.391	12.1843	-8.77955	0	-4.7	0.971	0.918	0.807781	0.574072	0.99971	26.5	0.9966
SDD	102145	7	32612848	T	G	AVL9	NP_055875.1	ENSP00000315568	L463R	FALSE	0.167	-3.7215	-3.747	-3.696	7.32385	-6.407	0.001	0.68	0.926	0.773	0.755252	0.339599	0.999459	29.6	0.8569
SDD	102157	19	1507280	C	G	ADAMTSL5	NP_998769.2	ENSP00000327608	L271F	FALSE	0.001	-3.007	-2.93	-3.084	5.0733	-3.9336	0.094	-0.1	0.449	0.154	0.537898	-0.106923	0.318205	14.21	0.2017
SDD	102160	19	1036460	G	A	CNN2	NP_004359.1	ENSP00000263097	G185S	FALSE	0.069	-3.119	-3.391	-2.847	6.18735	-6.1883	0.016	-3.67	0.881	0.813	0.766523	0.325054	0.884962	24.2	0.989
SDD	102166	11	102953549	G	A	DCUN1D5	NP_115675.1	ENSP00000260247	A90V	FALSE	0.0839866	-4.4935	-4.261	-4.726	8.145	-6.53982	0.001	1.99	0.862	0.616	0.833652	0.2825	0.999211	31	0.9956
SDD	102169	19	18971136	G	A	UPF1	NP_001284478.1	ENSP00000470142	R741H	TRUE	0.046	-4.699	-4.476	-4.922	10.3218	-6.53903		-3.13	0.817		0.899958	0.291539	0.998179	29.9	0.9885
SDD	102169	22	42273402	G	T	SREBF2	NP_004590.2	ENSP00000354476	R519L	TRUE	0.03	-3.597	-3.005	-4.189	12.5276	0.739328	0.001	-0.77	0.911	0.768	0.499943	0.379388	0.986767	29.7	0.7775
SDD	102172	15	92397158	G	A	SLCO3A1	NP_037404.2	ENSP00000320634	G7D	FALSE	0.935	-3.385	-2.866	-3.904	-3.61902	-1.1806	0.352	1.19	0.113	0.065	0.90797	-0.16478	0.368086	22.4	0.1664
SDD	102178	7	92731533	C	T	SAMD9	NP_060124.2	ENSP00000369292	R1293Q	TRUE	0.125	-3.4945	-3.497	-3.492	3.49792	-0.466305	0.255	1.92	0.262	0.055	0.317786	-0.159603	0.15923	9.965	0.1244
SDD	102194	9	138011806	G	A	OLFM1	NP_001269540.1	ENSP00000360858	V414I	FALSE	0.003	-3.492	-3.308	-3.676	4.22595	-2.9399	0.175	-2.85	0.478	0.614	0.847651	0.03423	0.450893	23.6	0.1268
SDD	1021	11	72423600	G	C	ARAP1	NP_056057.2	ENSP00000335506	P9R	TRUE	0.799	-3.027	-3.195	-2.859	1.80542	-0.388816	0.049	3.32	0.215	0.019	0.356751	-0.371442	0.0411455	0.072	0.0683
SDD	1021	17	37357491	G	C	RPL19	NP_000972.1	ENSP00000225430	A11P	TRUE	0.093	-4.6095	-4.365	-4.854	10.4203	-8.59269	0.001		0.931	0.928	0.823495	0.45264	0.957836	30	0.998
SDD	1021	17	40318360	C	A	KCNH4	NP_036417.1	ENSP00000264661	G599C	TRUE	0.014	-4.9925	-5.52	-4.465	13.1592	-11.9816	0	-9.08	0.972	0.957	0.822923	0.56998	0.999799	28.4	0.9923
SDD	1021	17	56405034	C	A	TSPOAP1	NP_004749.2	ENSP00000345824	C83F	TRUE	0.627	-3.097	-3.102	-3.092	2.40356	-0.240066	0.038	3.69	0.177	0.05	0.254414	-0.244566	0.00995805	11.98	0.0815
SDD	1021	3	71026829	T	C	FOXP1	NP_116071.2	ENSP00000318902	R465G	TRUE	0.012	-5.05	-5.561	-4.539	14.9326	-15.0969	0	-4.15	0.958	0.891	0.888357	0.560402	0.998789	28.3	0.9999
SDD	1021	X	48925146	A	G	CCDC120	NP_001156795.1	ENSP00000443351	E452G	FALSE	0.222	-3.472	-3.513	-3.431	3.04517	1.34252	0.005		0.293	0.054	0.666271	-0.142127	0.400931	22.3	0.1091
SDD	102209	12	133384856	C	T	GOLGA3	NP_001166028.1	ENSP00000442603	D267N	FALSE	0.101	-2.972	-2.975	-2.969	2.47949	-0.512034	0.1	1.51	0.129	0.07	0.314317	-0.433772	0.132099	13.8	0.0889
SDD	102209	1	178425950	G	T	RASAL2	NP_733793.2	ENSP00000356621	R769L	FALSE	0.20648	-3.079	-3.241	-2.917	3.603	0.368203	0.143	2.6	0.802	0.224	0.673466	0.0246433	0.954661	24.7	0.2169
SDD	10220	17	40376799	T	G	STAT5B	NP_036580.2	ENSP00000293328	N125H	TRUE	0.236	-3.6205	-3.473	-3.768	4.10522	-0.703363	0.026	0.64	0.626	0.156	0.546224	-0.0685216	0.878327	26.6	0.0782
SDD	102215	19	48830151	T	C	EMP3	NP_001300834.1	ENSP00000469194	I17T	FALSE	0.134	-3.3845	-3.477	-3.292	2.4939	-1.83121		-2.54	0.4		0.785164	-0.0752732	0.472348	22.8	0.6094
SDD	102215	7	150325659	G	T	GIMAP6	NP_001231001.1	ENSP00000479580	D79E	FALSE	0.903	-3.0245	-3.058	-2.991	0.258728	0.941884			0.044		0.269541	-0.25769	0.722533	0.162
SDD	102253	8	17611548	A	C	MTUS1	NP_001001924.1	ENSP00000262102	V590G	FALSE	0.170992	-2.8425	-2.676	-3.009	7.163	-0.0373531	0.001	1.27	0.439	0.203	0.373267	0.219765	0.983014	26	0.3909
SDD	102316	12	53877215	G	A	MAP3K12	NP_001180440.1	ENSP00000449038	R511W	FALSE	0.055	-4.077	-3.567	-4.587	10.0605	-4.33314	0	1.83	0.805	0.266	0.677618	0.211893	0.985662	26.3	0.3393
SDD	102320	1	26786568	C	G	DHDDS	NP_079163.2	ENSP00000353104	P233R	TRUE	0.02	-4.743	-4.719	-4.767	9.70694	-12.3574	0	-0.52	0.974	0.87	0.71224	0.384619	0.997516	25.4	0.9923
SDD	102323	1	236212177	G	A	NID1	NP_002499.2	ENSP00000264187	T113M	FALSE	0.123	-3.3665	-3.275	-3.458	6.01025	-1.6577	0.001	1.64	0.835	0.337	0.551978	0.12595	0.994369	24.8	0.2187
SDD	10234	2	27559242	G	A	GTF3C2	NP_001512.1	ENSP00000264720	T393M	FALSE	0.0120482	-3.757	-3.81	-3.704	4.547	-2.53926	0.033	-0.07	0.64	0.281	0.568437	0.00898787	0.807602	26.1	0.2083
SDD	102372	15	84473445	C	T	ADAMTSL3	NP_997400.2	ENSP00000286744	H121Y	FALSE	0.14	-3.256	-3.316	-3.196	2.95728	-1.5061	0.11	3.9	0.381	0.064	0.491543	-0.219371	0.298009	18.09	0.0876
SDD	10237	11	70222641	C	T	PPFIA1	NP_003617.1	ENSP00000253925	R1107C	TRUE	0.379	-3.79	-3.869	-3.711	7.21216	-9.27874	0	-2.78	0.983	0.878	0.678992	0.360519	0.997144	29.3	0.714
SDD	10237	3	113503167	A	G	ATP6V1A	NP_001681.2	ENSP00000273398	Q103R	TRUE	0.083	-5.216	-5.347	-5.085	11.2198	-9.2176	0	0.67	0.887	0.705	0.789273	0.351535	0.999691	28.2	0.9787
SDD	102386	22	38696937	G	C	CSNK1E	NP_001885.1	ENSP00000352929	I119M	FALSE	0.008	-3.015	-2.85	-3.18	3.79077	-3.26975	0.226	2.04	0.86	0.314	0.912109	-0.00860504	0.772889	18.39	0.5753
SDD	102386	22	38696937	G	C	TPTEP2-CSNK1E	NP_001276841.1	ENSP00000383067	I119M	FALSE	0.0219371	-2.9675	-2.842	-3.093	3.857	-3.26975	0.226	2.04	0.861	0.314	0.912109	-0.00860504	0.772889	18.39	0.5753
SDD	102399	1	985842	G	A	AGRN	NP_940978.2	ENSP00000368678	R1671Q	FALSE	0.141	-3.2495	-3.406	-3.093	1.42529	-0.796063	0.181	-1	0.399	0.237	0.489114	-0.218405	0.0669596	22.7
SDD	102399	20	62378462	C	T	ZBTB46	NP_079500.2	ENSP00000378536	D531N	FALSE	0.663312	-2.939	-3.026	-2.852	3.593	-3.72413	0.004	2.78	0.163	0.185	0.709904	-0.393896	0.84321	22.6	0.2327
SDD	102414	22	24447310	C	T	CABIN1	NP_036427.1	ENSP00000263119	S227L	FALSE	0.0982456	-3.3145	-3.436	-3.193	5.46	-0.523433	0.289	0.14	0.404	0.03	0.417173	-0.271192	0.0465987	20.7	0.0841
SDD	102423	16	55601251	C	T	CAPNS2	NP_115706.1	ENSP00000400882	R195C	FALSE	0.0155172	-3.5985	-3.51	-3.687	7.08	-4.91005	0.091	-1.4	0.417	0.561	0.388035	0.121198	0.925276	26.7	0.2134
SDD	102430	5	126206461	C	T	MARCHF3	NP_848545.1	ENSP00000309141	R209Q	FALSE	0.12	-3.034	-3.006	-3.062	2.34735	0.067355	1	2.29	0.115	0.122	0.458956	-0.393381	0.260133	19.45	0.1341
SDD	102439	12	112888198	G	A	PTPN11	NP_002825.3	ENSP00000340944	A72T	TRUE	0.944	-3.8095	-3.507	-4.112	6.76059	-6.77144	0.029	-4.03	0.837	0.752	0.870379	0.301462	0.98741	28.3	0.9982
SDD	10243	9	8389292	C	A	PTPRD	NP_002830.1	ENSP00000370593	M1442I	FALSE	0.058	-3.643	-3.667	-3.619	7.35498	-7.06417	0	-2.23	0.867	0.892	0.785255	0.34516	0.986571	25.9	0.7999
SDD	102442	1	180158700	G	A	QSOX1	NP_002817.2	ENSP00000356574	R344Q	FALSE	0.001	-2.484	-2.861	-2.107	-1.88977	-0.627999	0.356	3.61	0.107	0.091	0.207856	-0.35931	0.103741	4.539	0.0672
SDD	102454	8	145697773	G	T	KIFC2	NP_665697.1	ENSP00000301332	R546L	FALSE	0.0317139	-3.2275	-3.292	-3.163	7.457	-5.02132	0.013	-0.9	0.555	0.298	0.685027	0.0351374	0.877366	24.7	0.1571
SDD	102466	12	72017213	T	A	ZFC3H1	NP_659419.3	ENSP00000368017	E1557D	FALSE	0.078	-3.5625	-3.498	-3.627	1.66772	-0.101113	0.127	1.36	0.42	0.156	0.514116	-0.100482	0.737933	22.7	0.1236
SDD	102466	19	4548094	G	A	SEMA6B	NP_115484.2	ENSP00000467290	R516C	FALSE	0.008	-3.133	-3.202	-3.064	3.44263	-5.91101		1.89	0.451		0.526828	-0.205885	0.673854	26.7	0.2667
SDD	102481	19	36157778	G	C	UPK1A	NP_001268372.1	ENSP00000368298	V22L	TRUE	0.156	-3.035	-2.938	-3.132	-1.01099	0.646315	0.388	-1.07	0.166	0.231	0.44268	-0.142676	0.170335	0.47	0.0986
SDD	102481	3	113514730	C	T	ATP6V1A	NP_001681.2	ENSP00000273398	P412S	TRUE	0.028	-5.3265	-5.406	-5.247	11.8146	-11.2302	0.01	-1.39	0.687	0.808	0.899431	0.240291	0.999555	26.1	0.9947
SDD	102481	X	151092825	G	A	MAGEA4	NP_001011548.1	ENSP00000276344	G230E	FALSE	0.02	-2.64	-3.056	-2.224	0.713928	-2.26081	0.305	3.13	0.037	0.139	0.297273	-0.439028	0.0296217	0.621	0.1986
SDD	10248	1	214209146	C	T	PROX1	NP_001257545.1	ENSP00000355925	P728L	TRUE	0.133285	-4.4395	-4.354	-4.525	10.694	-3.0486			0.716	0.525	0.89403	0.124901	0.957346	26.4	0.7593
SDD	10248	20	472926	T	C	CSNK2A1	NP_001349700.1	ENSP00000495248	K198R	TRUE	0.0120329	-4.505	-4.584	-4.426	6.305	-10.1577					0.83717	0.110037	0.95265	24.9	0.9254
SDD	102523	1	152648745	G	A	LCE2C	NP_848516.1	ENSP00000357772	R85Q	FALSE	0.058	-2.551	-2.736	-2.366	1.98763	-2.78363	0.013	3.76	0.142	0.068		-0.444833	0.0774414	5.447	0.1099
SDD	102542	10	8115748	A	T	GATA3	NP_001002295.1	ENSP00000368632	N366I	TRUE	0.064	-4.972	-5.277	-4.667	9.52264	-12.715	0	-6.37	0.678	0.86	0.849074	0.37605	0.996593	27.8	0.9993
SDD	102542	5	176310785	A	G	HK3	NP_002106.2	ENSP00000292432	I680T	TRUE	0.066	-3.205	-3.205			-5.59224	0.001	-4.32	0.744	0.895	0.376562	0.414197	0.996622	27.4	0.3529
SDD	102542	7	99565862	G	A	AZGP1	NP_001176.1	ENSP00000292401	R177W	TRUE	0.012	-3.543	-3.245	-3.841	7.35565	-1.81323	0	-2.59	0.503	0.358	0.419351	0.00417449	0.982329	22.7	0.3643
SDD	102545	11	61183979	C	T	CPSF7	NP_079087.3	ENSP00000345412	R231Q	FALSE	0.062	-3.157	-2.971	-3.343	3.51599	-0.704183	0.117		0.378	0.314	0.624926	-0.0781152	0.10688	24.9	0.2816
SDD	102551	6	30457322	C	T	HLA-E	NP_005507.3	ENSP00000365817	T5I	FALSE	0.71	-2.9085	-2.896	-2.921	3.55951	-2.90595	0	5.85	0.122	0.033	0.409625	-0.261469	0.404673	0.263	0.1113
SDD	10256	16	67325602	G	A	KCTD19	NP_001094385.1	ENSP00000305702	T786M	FALSE	0.17	-3.413	-3.387	-3.439	2.9762	-0.692947	0	0.04	0.686	0.153	0.539168	-0.140624	0.421916	23.9	0.1002
SDD	102572	1	209791873	C	T	LAMB3	NP_000219.2	ENSP00000348384	V945M	FALSE	0.024	-3.1395	-3.118	-3.161	5.17175	-0.925178	0.034	0.94	0.355	0.226	0.636029	-0.212857	0.675542	23.8	0.2051
SDD	102575	10	88220182	C	T	WAPL	NP_055860.1	ENSP00000298767	E852K	FALSE	0.0314894	-4.86	-5.113	-4.607	10.684	-3.19894	0.02	0.8	0.876	0.484	0.815668	0.272352	0.984617	27.3	0.9915
SDD	102578	2	33614319	G	A	LTBP1	NP_001159736.2	ENSP00000393057	V1226I	TRUE	0.459	-3.132	-3.132			-0.433132	0.155	-1.3	0.367	0.174	0.510674	0.00436043	0.424057	21.9	0.1086
SDD	102605	8	30546776	C	T	GSR	NP_000628.2	ENSP00000221130	G315S	FALSE	0.046	-3.012	-2.991	-3.033	4.39331	-1.51344	0.08	1.01	0.14	0.109	0.373207	-0.324158	0.0454333	20.8	0.0983
SDD	102624	21	46387080	C	T	SLX9	NP_001303913.1	ENSP00000380926	R147W	FALSE	0.19539	-3.3945	-3.495	-3.294	9.163	-3.31276	0.005	0.87	0.261	0.051	0.47853	-0.163699	0.864249	22.1	0.0969
SDD	102629	16	67401321	C	T	LRRC36	NP_001155047.1	ENSP00000455103	P265S	TRUE	0.11	-3.2875	-3.398	-3.177	1.00195	0.795706	0.24	2.25	0.063		0.344874	-0.287141	0.0569681	9.637	0.0773
SDD	102629	3	42916269	G	A	CYP8B1	NP_004382.2	ENSP00000318867	T347M	TRUE	0.043	-3.4705	-3.608	-3.333	4.87793	-6.05505	0.034	-0.63	0.723	0.545	0.337971	-0.0135283	0.965253	21.9	0.1843
SDD	102629	9	80040567	G	A	GNA14	NP_004288.1	ENSP00000365807	S263L	TRUE	0.068	-3.481	-3.592	-3.37	6.56335	-9.15038	0.001	-2.36	0.845	0.813	0.792189	0.346341	0.991472	31	0.8635
SDD	10262	X	10181808	C	T	CLCN4	NP_001821.2	ENSP00000370213	A555V	FALSE	0.019	-4.274	-4.096	-4.452	5.86102	-6.97413	0.033	-3.63	0.742	0.734	0.772362	0.342448	0.947926	23.1	0.8682
SDD	102644	22	44280192	C	T	PNPLA5	NP_620169.1	ENSP00000216177	R328Q	TRUE	0.405949	-2.735	-3.004	-2.466	2.291	-0.907094	0.119	1.46	0.105	0.035	0.271394	-0.365042	0.0425848	1.121	0.0837
SDD	102644	8	133192501	C	T	KCNQ3	NP_004510.1	ENSP00000373648	R227Q	TRUE	0.017	-4.4155	-4.729	-4.102	6.80255	-12.3843	0	-4.67	0.893	0.912	0.829903	0.370887	0.998677	28.8	0.8999
SDD	102653	8	144658300	A	G	NAPRT	NP_660202.3	ENSP00000401508	I352T	FALSE	0.102	-2.9535	-2.722	-3.185	8.51172	-4.51178	0	0.23	0.893	0.453	0.636158	0.296688	0.997544	24.6	0.4535
SDD	102657	15	72862579	G	A	ARIH1	NP_005735.2	ENSP00000369217	R363H	FALSE	0.012	-4.8155	-4.988	-4.643	4.88928	-8.05774	0.01	-1.44	0.602	0.769	0.947397	0.264746	0.964936	31	0.9236
SDD	102657	17	78265587	C	T	RNF213	NP_066005.2	ENSP00000324392	R478C	FALSE	0.0406504	-3.7785	-3.48	-4.077	7.334	-0.609229	0		0.762	0.359	0.52755	0.168662	0.995581	25.3	0.3348
SDD	102691	7	101266301	A	C	MYL10	NP_612412.2	ENSP00000223167	L109V	FALSE	0.001	-3.3935	-3.241	-3.546	6.23315	-9.10915	0.001	-1.52	0.887	0.678	0.742062	0.189321	0.941916	24.4	0.6973
SDD	102745	3	154022718	C	T	DHX36	NP_065916.2	ENSP00000417078	E338K	FALSE	0.0293947	-4.9435	-5.265	-4.622	10.271	-13.2435	0	0.23	0.957	0.674	0.7545	0.378058	0.999706	27.9	0.9981
SDD	102748	22	46098727	C	T	ATXN10	NP_001161093.1	ENSP00000370449	P152L	FALSE	0.026	-2.863	-2.859	-2.867	-0.968994	1.40962	0.32		0.342	0.062	0.413548	-0.276734	0.072531	23.3	0.1928
SDD	102748	2	55155552	G	A	EML6	NP_001034842.2	ENSP00000348842	D1260N	FALSE	0.066	-3.593	-3.686	-3.5	8.01807	-4.73157	0	2.74	0.873	0.489	0.862126	-0.114549	0.97288	26.4	0.9104
SDD	10274	13	38229380	C	A	TRPC4	NP_057263.1	ENSP00000369027	G577W	FALSE	0.03	-5.1805	-5.887	-4.474	13.6875	-14.4394	0	-5.21	0.901	0.974	0.922084	0.566303	0.999325	27.9	0.999
SDD	10274	2	15770232	G	A	DDX1	NP_004930.1	ENSP00000233084	G697D	FALSE	0.219	-3.3485	-3.239	-3.458	2.8136	-3.42758	0.403	1.06	0.747	0.265	0.660273	0.061131	0.876897	24.1	0.4024
SDD	102754	3	71021817	C	T	FOXP1	NP_116071.2	ENSP00000318902	R514H	TRUE	0.036	-4.771	-4.934	-4.608	15.105	-12.6501	0	-4.7	0.961	0.943	0.917427	0.580772	0.999883	29.7	0.9999
SDD	102763	6	26216513	G	A	H2BC8	NP_003509.1	ENSP00000445633	T120I	FALSE	0.155	-2.056	-1.652	-2.46	6.19246	-6.63069	0.006	0.93	0.861		0.881657	0.275882	0.992034	26.2
SDD	102791	11	134128471	C	T	ACAD8	NP_055199.1	ENSP00000281182	P148L	FALSE	0.015	-3.0765	-3.268	-2.885	0.180542	-2.34884	0.271	-6.55	0.77	0.555	0.421408	0.151567	0.0652311	20.4	0.1157
SDD	102791	1	36499891	G	T	AGO3	NP_079128.2	ENSP00000362287	V570F	FALSE	0.016	-4.8405	-5.15	-4.531	6.18298	-9.82721	0	1.39	0.808	0.601	0.910387	0.307833	0.998058	28.9	0.9486
SDD	102794	12	56118210	C	T	RDH5	NP_002896.2	ENSP00000257895	R280C	FALSE	-1	-3.512	-3.502	-3.522	6.25604	-5.97159	0	-2.96	0.931	0.83	0.789399	0.364837	0.999549	30	0.7435
SDD	102794	6	28403901	C	T	ZSCAN23	NP_001012458.1	ENSP00000289788	R48H	FALSE	0.787	-3.582	-3.582			-2.98616	0	3.19	0.459	0.083	0.629497	-0.328815	0.585354	21.3	0.3325
SDD	1027	19	33703256	C	T	SLC7A10	NP_062823.1	ENSP00000253188	A244T	FALSE	0.0209862	-3.284	-3.243	-3.325	5.981	-5.69971	0.001	-2.71	0.907	0.891	0.835143	0.202168	0.956795	26	0.7379
SDD	102800	19	1226492	G	A	STK11	NP_000446.1	ENSP00000324856	R383H	TRUE	0.826	-2.8	-2.694	-2.906	2.54315	-0.756642	0.153	-0.37	0.253	0.055	0.328537	-0.1659	0.135645	20.3	0.0711
SDD	102800	2	28999810	C	G	PPP1CB	NP_996759.1	ENSP00000398839	P49R	TRUE	0.118	-5.261	-5.079	-5.443	7.11974	-8.85223	0	0.78		0.438	0.8944	0.163481	0.999807	26.7	0.9609
SDD	102826	19	12157458	T	C	ZNF878	NP_001073873.2	ENSP00000447931	T41A	FALSE	0.953	-3.0195	-2.768	-3.271	0.148193	1.27515	1	4.76	0.015	0.014	0.273401	-0.438008	0.0671484	0.013	0.0776
SDD	102837	11	129992366	G	A	APLP2	NP_001633.1	ENSP00000263574	D294N	TRUE	0.362	-2.691	-2.398	-2.984	2.8291	-6.29332	0.17	-1.73	0.086	0.184	0.30018	-0.193502	0.0202561	6.813	0.0641
SDD	102837	7	140449165	A	C	BRAF	NP_004324.2	ENSP00000493543	D638E	TRUE	0.065	-5.2665	-5.481	-5.052	8.71625	-14.1567					0.929745	0.52076	0.99681	23.7	0.999
SDD	102841	7	6639759	G	A	INTS15	NP_001289968.1	ENSP00000351974	V197I	FALSE	0.0333988	-2.8605	-2.946	-2.775	4.383	-0.627727	0.142	1.15	0.274	0.035		-0.395805	0.0544442	18.71	0.0701
SDD	102849	12	13768471	G	A	GRIN2B	NP_000825.2	ENSP00000477455	H486Y	TRUE	0.041	-4.5745	-4.502	-4.647	6.64624	-4.65523			0.781		0.912335	0.335228	0.993564	27.3	0.9868
SDD	102849	7	99707864	G	A	TAF6	NP_005632.1	ENSP00000344537	R373C	TRUE	0.006	-3.566	-3.611	-3.521	6.3847	-6.76663	0.145	-1.33	0.924	0.64	0.921136	0.162287	0.496373	29.1	0.6478
SDD	102878	2	235950495	A	C	SH3BP4	NP_055336.1	ENSP00000375867	D361A	FALSE	0.005	-3.661	-3.583	-3.739	6.94324	-4.17548	0.002	1	0.913	0.645	0.503681	0.280482	0.988144	27.5	0.6636
SDD	102889	12	53345268	G	A	KRT18	NP_000215.1	ENSP00000373487	V221I	TRUE	0.008	-3.2545	-3.153	-3.356	5.39714	-1.644	0.113	-2.41	0.347	0.257	0.480114	0.00133836	0.442801	22.6	0.1862
SDD	102889	4	1806243	G	A	FGFR3	NP_001156685.1	ENSP00000339824	R423Q	TRUE	0.057	-3.012	-3.054	-2.97	4.44971	-5.41586	0.002	-2.67	0.833	0.855	0.709228	0.253112	0.931025	32	0.3722
SDD	102893	15	31294747	C	T	TRPM1	NP_002411.3	ENSP00000380897	D1364N	TRUE	0.222	-3.165	-3.085	-3.245	3.02881	0.144124	0.222	0.78	0.059	0.091	0.272608	-0.282862	0.0866444	13.59	0.0734
SDD	102893	18	42618454	G	T	SETBP1	NP_056374.2	ENSP00000497406	M1335I	TRUE	0.24	-2.851	-3.06	-2.642	-0.665771	0.615302					0.471259	-0.18694	0.309847	14.26	0.1784
SDD	102899	9	140323731	C	T	NOXA1	NP_006638.1	ENSP00000342848	R170W	FALSE	0.021	-3.056	-3.043	-3.069	5.22882	-2.84011	0.004	-0.34	0.286	0.224	0.35259	-0.258674	0.36936	23.4
SDD	10291	6	111136258	C	G	CDK19	NP_055891.1	ENSP00000357907	G28R	TRUE	0.074	-5.0365	-5.323	-4.75	10.1404	-15.5415	0.001	-1.64	0.861	0.891	0.945461	0.412224	0.99961	28.6	0.9999
SDD	102921	11	75319164	T	C	MAP6	NP_149052.1	ENSP00000307093	E370G	FALSE	0.018	-3.3875	-2.975	-3.8	8.20459	-2.19254	0.003	0.37	0.279	0.439	0.411028	0.0282453	0.991578	31	0.4637
SDD	102934	16	15872669	G	A	MYH11	NP_001035202.1	ENSP00000407821	T260M	TRUE	0.133	-3.461	-3.461			-3.59488	0.001	-2.35	0.634	0.534	0.902102	-0.0291999	0.37666	22.8	0.1621
SDD	102934	9	126125420	G	A	CRB2	NP_775960.4	ENSP00000362734	R124H	TRUE	0.512	-2.8135	-2.911	-2.716	2.02478	-0.337136	0.554	-2.38	0.082	0.277	0.242282	-0.137295	0.0530925	0.18	0.0665
SDD	10294	X	48458869	A	G	WDR13	NP_001334146.1	ENSP00000365919	N229S	FALSE	-1	-3.724	-3.724			-3.21158	0.005	-0.09	0.589	0.468	0.774798	-0.210807	0.989591	25.5	0.4972
SDD	102967	17	7307375	C	G	TMEM256	NP_689979.1	ENSP00000301939	R10P	FALSE	0.045	-3.4395	-3.34	-3.539	6.2699	-3.21024	0.026		0.838	0.306	0.750985	0.19906	0.996351	29.9	0.277
SDD	10296	21	43162062	C	T	RIPK4	NP_065690.2	ENSP00000332454	V431M	TRUE	0.008	-3.102	-3.102		6.58618	-4.22657	0.003	-0.15	0.565	0.39	0.677799	0.016458	0.651739	25.6
SDD	102970	11	686992	G	A	DEAF1	NP_066288.2	ENSP00000371846	R224W	TRUE	0.02	-3.876	-4.193	-3.559	4.85504	-10.8659	0.002	-0.76	0.828	0.835	0.642665	0.0780452	0.981026	28.9	0.9921
SDD	102970	1	6173016	T	A	CHD5	NP_056372.1	ENSP00000262450	E1652V	TRUE	0.812754	-3.3245	-3.389	-3.26	3.783	-0.651445	0.016	-2.93	0.336	0.078	0.457364	0.0725183	0.840499	25	0.1572
SDD	102973	15	84582038	G	A	ADAMTSL3	NP_997400.2	ENSP00000286744	R632Q	TRUE	0.036	-3.078	-3.127	-3.029	2.00146	0.303178	0.627	-0.11	0.041	0.073	0.236394	-0.349801	0.0431438	0.006	0.0645
SDD	102973	17	7806606	A	G	CHD3	NP_001005271.2	ENSP00000369716	H1230R	TRUE	0.01	-5.5275	-6.002	-5.053	10.4324	-10.6787	0	-0.96	0.939	0.931	0.878689	0.423627	0.999715	27.6	0.9942
SDD	102973	1	206778778	G	A	EIF2D	NP_008824.2	ENSP00000271764	L169F	TRUE	0.0359756	-3.5485	-3.741	-3.356	4.336	-5.47074	0.074	0.36	0.745	0.312	0.630652	0.242281	0.97131	24.4	0.1142
SDD	102976	17	39139374	A	G	KRT40	NP_872303.2	ENSP00000381500	C152R	FALSE	0.04	-3.25	-3.192	-3.308	5.78766	-5.85204	0.003	-2.32	0.528	0.525	0.599909	0.104344	0.98305	25.4	0.205
SDD	102979	2	27454939	G	A	CAD	NP_004332.2	ENSP00000264705	R831H	TRUE	-1	-3.1025	-3.164	-3.041	3.78247	-0.852332	0.008	-4.04	0.259	0.526	0.643432	-0.0312412	0.823285	26.9	0.0872
SDD	102979	4	55602671	T	C	KIT	NP_000213.1	ENSP00000288135	L831P	TRUE	0.05	-4.996	-5.178	-4.814	12.4035	-11.6893	0	-2.56	0.956	0.825	0.902095	0.448311	0.992104	28.2	0.9999
SDD	103056	15	85681095	C	A	PDE8A	NP_002596.1	ENSP00000378056	D817E	TRUE	0.09	-3.1195	-2.955	-3.284	5.18799	-5.42784	0.253	-1	0.562	0.372	0.579298	-0.00400823	0.162024	10.51	0.378
SDD	103056	5	78135181	G	A	ARSB	NP_000037.2	ENSP00000264914	P404L	TRUE	0.141	-2.8705	-2.712	-3.029	4.77399	-0.555596	0.007	-3.93	0.431	0.617	0.378615	0.264514	0.181293	24.3	0.1054
SDD	103065	1	154245212	G	C	HAX1	NP_006109.2	ENSP00000329002	D5H	TRUE	0.192	-3.499	-3.515	-3.483	7.06699	-4.9092	0.001	0.88	0.738	0.338	0.743161	0.380004	0.997841	32	0.6875
SDD	103065	22	30950947	C	G	GAL3ST1	NP_001305037.1	ENSP00000385207	R422P	TRUE	0.87599	-3.035	-2.754	-3.316	5.199	-1.49711	0.014	2.18	0.209	0.044	0.28277	-0.185526	0.4293	22.7	0.1857
SDD	103069	15	42107937	C	T	MAPKBP1	NP_001122080.1	ENSP00000393099	S484L	FALSE	0.003	-4.0055	-4.629	-3.382	4.2146	-5.17542	0.116	-0.37	0.697	0.24	0.63852	0.204158	0.922447	25.2	0.3219
SDD	103072	17	78449496	G	A	NPTX1	NP_002513.2	ENSP00000307549	S156F	FALSE	0.145	-3.623	-3.352	-3.894	7.06146	-3.0228	0.002	2.72	0.59	0.167	0.779384	-0.0524122	0.988619	30	0.3421
SDD	103099	19	17741004	C	T	UNC13A	NP_001073890.2	ENSP00000429562	E1207K	FALSE	0.013	-3.8895	-3.544	-4.235	8.15845	0.0210182	0.004	-1.21	0.84	0.743	0.877424	0.103471	0.985002	25.7	0.9536
SDD	1030	21	15872895	T	G	SAMSN1	NP_001243299.1	ENSP00000285670	K309N	FALSE	0.004	-2.8315	-2.979	-2.684	1.30701	0.711069	0.165	-1.97	0.172	0.221	0.278251	-0.19937	0.101154	9.738	0.1191
SDD	1030	7	111629139	C	T	DOCK4	NP_055520.3	ENSP00000404179	G132D	FALSE	0.168	-3.74	-3.687	-3.793	10.4224	-1.65987	0.001	3.84	0.804	0.57	0.935687	0.240059	0.993372	26.4	0.9826
SDD	103112	12	51663035	G	C	SMAGP	NP_001026798.1	ENSP00000475068	P10A	FALSE	0.584984	-3.3075	-3.021	-3.594	4.796	-0.977527		0.97	0.379		0.390895	-0.186091	0.712091	20.6	0.0768
SDD	103115	1	158746935	G	A	OR6N2	NP_001005278.1	ENSP00000493148	S164F	FALSE	0.0230199	-3.115	-3.11	-3.12	3.818	-3.36133					0.362142	0.0679618	0.899085	23.7	0.3592
SDD	103123	8	27685676	G	A	PBK	NP_001265874.1	ENSP00000428489	P33L	FALSE	0.131	-3.7105	-3.657	-3.764	9.42194	-6.5626	0	1.46	0.789	0.53	0.727102	0.0887602	0.999495	28.1	0.9206
SDD	103129	12	70824362	G	A	KCNMB4	NP_055320.4	ENSP00000258111	V188M	FALSE	0.194	-4.106	-3.846	-4.366	9.52448	-1.9481	0.001	2.4	0.819	0.399	0.860498	0.213522	0.936949	28	0.481
SDD	103129	X	153296882	G	A	MECP2	NP_001104262.1	ENSP00000395535	R145C	FALSE	0	-4.1855	-4.384	-3.987	7.66669	-9.7825	0	-4.84	0.971	0.986	0.815913	0.730504	0.999316	32	0.9999
SDD	103134	6	110421801	A	G	WASF1	NP_001020105.1	ENSP00000376367	L535P	TRUE	0.431	-4.7475	-5.119	-4.376	8.23218	-10.9783	0	-0.84	0.982	0.814	0.914389	0.400847	0.996436	28.1	1
SDD	103146	18	56008979	C	T	NEDD4L	NP_056092.2	ENSP00000372301	R423W	TRUE	0.471	-4.003	-4.267	-3.739	4.28699	-11.3656	0.001	1.3	0.712	0.275	0.751643	0.211231	0.78614	28	0.7195
SDD	103146	20	62065201	C	G	KCNQ2	NP_742105.1	ENSP00000352035	W360S	TRUE	0.009	-5.133	-5.584	-4.682	8.06238	-12.3354	0.012	-5.71	0.788	0.924	0.863664	0.526838	0.998665	29.9	0.9968
SDD	103146	9	14747381	T	C	FREM1	NP_659403.4	ENSP00000370262	T1964A	TRUE	0.797	-2.843	-2.843		-2.83813	-0.04276	0.656	2.9	0.013	0.004	0.233713	-0.555509	0.0243718	0.105	0.0568
SDD	103155	17	74015632	T	C	EVPL	NP_001307676.1	ENSP00000465630	T372A	FALSE	0.341538	-2.9705	-2.938	-3.003	4.982	1.6419		-0.1	0.147		0.271001	-0.24677	0.153568	5.849	0.0632
SDD	103158	4	3769463	A	C	ADRA2C	NP_000674.2	ENSP00000386069	E377A	FALSE	0.301	-3.8435	-3.803	-3.884	8.69074	-5.94997	0.001	-0.93	0.498	0.825	0.945344	0.132309	0.99697	29.5	0.9934
SDD	103160	10	93390385	C	A	PPP1R3C	NP_005389.1	ENSP00000238994	V85F	FALSE	0.013	-4.061	-4.088	-4.034	7.91211	-7.58932	0	-0.81	0.937	0.83	0.709853	0.383347	0.998845	26.4	0.9655
SDD	103201	X	54020245	G	A	PHF8	NP_055922.1	ENSP00000338868	A472V	FALSE	0.147	-3.331	-3.577	-3.085	2.35217	-0.198992	0.484	2.24	0.045	0.131	0.360576	-0.40255	0.0542679	15	0.0984
SDD	103204	2	239025674	C	T	ESPNL	NP_919288.2	ENSP00000339115	P329L	FALSE	0.527	-2.8155	-2.924	-2.707	3.46484	-2.57773	0.033	-0.09	0.138	0.035	0.466256	-0.281657	0.0663446	19.13	0.119
SDD	103210	15	49183001	T	C	SHC4	NP_976224.3	ENSP00000329668	I222V	FALSE	0.073	-3.4385	-3.161	-3.716	11.156	-4.44339	0.002	2.02	0.761	0.241	0.637931	-0.169227	0.784381	25.9	0.3765
SDD	103210	X	62570611	G	A	SPIN4	NP_001012986.2	ENSP00000364018	R30C	FALSE	0.126	-4.123	-4.062	-4.184	3.62396	-3.21352				0.19	0.83836	-0.305728	0.290587	23.9	0.1966
SDD	103213	19	18964090	T	G	UPF1	NP_001284478.1	ENSP00000470142	C374G	TRUE	0.034	-3.549	-3.595	-3.503	3.8421	-1.53707		-2.47	0.859		0.883064	0.389329	0.874345	26.1	0.3464
SDD	103222	4	103228735	G	A	SLC39A8	NP_071437.3	ENSP00000378310	T137M	TRUE	0.043	-3.9585	-3.733	-4.184	9.2742	-6.72323	0	0.77	0.686	0.502	0.593156	0.0954529	0.985172	27.1	0.3872
SDD	103228	3	193132488	C	T	ATP13A4	NP_115655.2	ENSP00000339182	R965Q	FALSE	0.114	-2.8235	-3.099	-2.548	-1.0083	-0.0582834	0.865	-2.47	0.179	0.208	0.347058	-0.0473037	0.126114	18.96	0.075
SDD	103231	14	81744148	G	A	STON2	NP_001243359.1	ENSP00000450857	R503C	FALSE	0.00360685	-3.295	-3.455	-3.135	3.384	-3.36249	0.05	2.67	0.447	0.202	0.428584	-0.203747	0.48569	25	0.1803
SDD	103231	19	39976401	C	T	TIMM50	NP_001001563.2	ENSP00000475531	T149M	FALSE	-1	-3.9065	-4.099	-3.714	11.2487	-9.97316			0.936		0.724206	0.283896	0.998106	26.1	0.96
SDD	103252	7	79818291	C	T	GNAI1	NP_002060.4	ENSP00000497260	T48I	TRUE	0.165	-4.6065	-4.802	-4.411	9.41504	-12.0487					0.897791	0.529266	0.999196	29.1	0.9998
SDD	103268	19	3206357	C	T	NCLN	NP_064555.2	ENSP00000246117	T478M	FALSE	0.131	-3.36	-3.054	-3.666	8.10608	-3.40851	0.087	1.45	0.789	0.176	0.631132	0.054516	0.820389	26.1	0.1306
SDD	103268	3	99649795	T	C	FILIP1L	NP_878913.2	ENSP00000346560	S24G	FALSE	0.493	-3.1415	-3.252	-3.031	2.22119	-0.466298	0.368	2.27	0.078	0.023	0.229891	-0.39142	0.0410688	1.037	0.0681
SDD	103325	13	26967526	A	G	CDK8	NP_001251.1	ENSP00000370938	I223M	TRUE	0.001	-4.503	-4.503			-11.7178	0	0.53	0.837	0.404	0.821592	0.156229	0.985314	24.9	0.9927
SDD	103338	1	179348610	T	C	AXDND1	NP_653297.3	ENSP00000356590	Y192H	FALSE	0.079	-3.2285	-3.246	-3.211	4.44055	-0.631036	0.14	2.1	0.286	0.1	0.642217	-0.203554	0.865748	23.2	0.1632
SDD	103342	14	24608641	G	A	EMC9	NP_057133.2	ENSP00000216799	P123L	FALSE	0.0816158	-3.129	-3.136	-3.122	0.174	0.331054	0.777	1.02	0.175	0.072	0.352097	-0.180021	0.464574	17.94	0.0858
SDD	103342	2	37480483	G	A	PRKD3	NP_005804.1	ENSP00000234179	T837I	FALSE	0.151	-3.429	-3.175	-3.683	6.10498	-2.16437	0.284	1.09	0.716	0.326	0.863172	0.0987153	0.865002	23.2	0.5658
SDD	103351	X	44929277	G	A	KDM6A	NP_066963.2	ENSP00000367203	G793S	FALSE	0.046	-3.3005	-3.307	-3.294	1.22168	1.05373	0.115	-1.41	0.089	0.417	0.598243	0.0574323	0.989567	22.5	0.0678
SDD	103362	13	30814649	A	C	KATNAL1	NP_001014402.1	ENSP00000369991	V225G	FALSE	0.003	-4.2405	-4.731	-3.75	7.1181	-13.4256	0	-3.56	0.804	0.911	0.740703	0.542898	0.997498	28.2	0.9547
SDD	103362	5	180664637	G	C	RACK1	NP_006089.1	ENSP00000426909	T287S	FALSE	0.929	-4.146	-3.666	-4.626	5.83252	-1.60214	0.058	0.1	0.399	0.088	0.685576	0.0647323	0.884671	22.6	0.3018
SDD	103371	14	101004821	C	T	BEGAIN	NP_065887.1	ENSP00000347301	V423M	FALSE	0.055	-3.2765	-2.989	-3.564	5.92065	-1.28902	0.001		0.56	0.333	0.85266	0.0795913	0.979364	23.7	0.1654
SDD	103374	19	18548725	T	C	ISYNA1	NP_057452.1	ENSP00000337746	E22G	FALSE	0.56	-3.1545	-2.764	-3.545	7.89001	-3.79247	0.199		0.565	0.078	0.875086	-0.00733731	0.848729	25.2	0.3051
SDD	103385	7	44619098	C	T	TMED4	NP_872353.2	ENSP00000404042	E222K	FALSE	0.105	-2.8	-2.491	-3.109	4.01663	-5.06984	0.585	2.41	0.782	0.261	0.861626	0.137194	0.848181	23.1	0.7749
SDD	103385	X	122616672	T	C	GRIA3	NP_015564.5	ENSP00000478489	L821P	FALSE	-1	-5.5685	-5.904	-5.233	8.1593	-12.8354			0.953		0.950374	0.539022	0.972582	27.6	0.9988
SDD	103400	19	55589479	G	C	EPS8L1	NP_573441.2	ENSP00000201647	S14T	FALSE	0.528	-3.035	-2.827	-3.243	8.49866	-2.63949	0.005	3.45	0.209	0.097	0.709117	-0.193867	0.803786	24.7	0.1304
SDD	10341	12	6702658	C	T	CHD4	NP_001264.2	ENSP00000440542	R813H	TRUE	0.054447	-6.171	-6.803	-5.539	11.299	-9.47328				0.943	0.820229	0.529573	0.998801	29.1	0.9958
SDD	10341	18	10485668	C	G	APCDD1	NP_694545.1	ENSP00000347433	H328Q	TRUE	0.012	-3.73	-3.758	-3.702	8.62854	-5.83346	0.003	2.16	0.922	0.518	0.80623	0.133348	0.992959	25.3	0.9947
SDD	10341	1	43308545	G	A	ERMAP	NP_061008.2	ENSP00000361592	C357Y	TRUE	0.022	-3.402	-3.32	-3.484	5.80273	-1.8965	0.066	-0.34	0.138	0.245	0.391993	-0.0152973	0.206308	17.24	0.1853
SDD	103423	13	111870194	C	G	ARHGEF7	NP_001106983.1	ENSP00000364893	P234A	FALSE	0.094	-4.734	-4.906	-4.562	10.8447	-12.2858	0	-1.84	0.831	0.897	0.693262	0.348917	0.999818	24.6	0.9971
SDD	103423	20	17623661	G	C	RRBP1	NP_004578.3	ENSP00000354045	S242C	FALSE	0.018	-3.4295	-3.556	-3.303	3.67761	-3.35611	0.005	0.94	0.44	0.263	0.420255	-0.0354514	0.931713	28.4	0.1299
SDD	103423	7	143090861	G	A	EPHA1	NP_005223.4	ENSP00000275815	R867C	FALSE	0.162	-3.31	-3.343	-3.277	5.20422	-5.50109	0	0.02	0.381	0.144	0.289967	-0.316348	0.210483	20.4	0.0847
SDD	10345	2	172584363	T	A	DYNC1I2	NP_001258714.1	ENSP00000386415	F343L	TRUE	0.006	-4.3645	-4.304	-4.425	9.83643	-10.7748	0.001	-0.47	0.714	0.594	0.921129	0.234364	0.989826	24.8	0.9995
SDD	103460	17	4910270	C	G	KIF1C	NP_006603.2	ENSP00000320821	A409G	FALSE	0.127	-3.116	-3.074	-3.158	2.61566	-1.07778	0.393	-0.71	0.203	0.107	0.361439	-0.196253	0.102302	13.15	0.0829
SDD	103466	22	38212622	C	T	GCAT	NP_001165161.1	ENSP00000371110	A412V	TRUE	0.0659692	-3.361	-3.354	-3.368	7.792	-10.2559	0	-3.71	0.853	0.955	0.755752	0.545711	0.999062	26.6	0.9214
SDD	103466	6	101315834	A	G	ASCC3	NP_006819.2	ENSP00000358159	S14P	TRUE	0.698419	-3.5375	-3.501	-3.574	7.762	-1.14361	0.036	0.19	0.537	0.375	0.812783	0.272522	0.871151	27.3	0.9305
SDD	103474	7	127014002	G	A	ZNF800	NP_789784.2	ENSP00000265827	P463L	FALSE	0.373	-3.274	-3.619	-2.929	0.0592041	-1.29981	0.125	2.45	0.141	0.045	0.579872	-0.376784	0.10092	18.54	0.0714
SDD	103485	15	40558593	G	A	PAK6	NP_001263646.1	ENSP00000439597	R252Q	FALSE	0.551	-2.8555	-2.997	-2.714	0.569214	-0.291962	0.51	-0.71	0.104	0.085	0.39563	-0.313423	0.0410424	15.37	0.0594
SDD	10348	15	52536610	C	T	MYO5C	NP_061198.2	ENSP00000261839	R778Q	FALSE	0.005	-3.137	-3.188	-3.086	3.34351	-0.310335	0.032	-3.72	0.257	0.23	0.23832	-0.0649927	0.895755	21.9	0.0891
SDD	1034	4	88005285	A	G	AFF1	NP_001160165.1	ENSP00000378578	N358S	FALSE	0.353	-2.862	-2.971	-2.753	2.07751	1.49535	0.45	-0.02	0.117	0.095	0.332789	-0.427504	0.189827	10.26	0.0568
SDD	103500	5	180039519	C	T	FLT4	NP_002011.2	ENSP00000377016	G1175D	TRUE	0.135	-2.746	-3.032	-2.46	-3.71313	0.350291	0.104	-1.05	0.221	0.104	0.308899	-0.198458	0.0295538	10.65	0.1007
SDD	103503	12	56536492	G	A	ESYT1	NP_001171725.1	ENSP00000267113	R965Q	FALSE	0.44106	-3.3005	-3.149	-3.452	5.194	-0.505721	0.127	0.5	0.35	0.129	0.499446	-0.13653	0.624223	23.4	0.1255
SDD	10351	X	153296876	T	C	MECP2	NP_001104262.1	ENSP00000395535	K147E	FALSE	0	-4.5975	-5.155	-4.04	7.91321	-13.712	0.001	-6.06	0.955	0.933	0.824089	0.66446	0.982484	25.6	0.9999
SDD	103566	1	171679920	T	C	VAMP4	NP_003753.2	ENSP00000236192	M67V	FALSE	0.001	-3.8435	-3.973	-3.714	6.89017	-10.1358	0	0.22	0.838	0.553	0.845137	0.325266	0.984605	25.1	0.9065
SDD	10356	16	28857235	T	C	TUFM	NP_003312.3	ENSP00000322439	K82R	TRUE	0.136	-3.149	-3.149			-1.43106	0.019	-0.52	0.736	0.459	0.768871	0.14979	0.991371	33
SDD	10356	9	130575711	G	A	FPGS	NP_004948.4	ENSP00000362344	R531Q	TRUE	0.76517	-3.182	-2.931	-3.433	6.198	-3.11789	0.015	2.64	0.676	0.17	0.462849	-0.034394	0.975861	28	0.0962
SDD	103611	15	93595243	C	T	RGMA	NP_001159755.1	ENSP00000452126	A217T	TRUE	0.0538662	-2.551	-2.807	-2.295	0.522	-0.177369	0.298	-4.36	0.181	0.147	0.513666	-0.0418472	0.268558	19.51	0.0721
SDD	103611	1	112329637	G	A	KCND3	NP_004971.2	ENSP00000319591	P400S	TRUE	0.035	-4.428	-4.534	-4.322	6.73859	-10.9121	0.025	-4.92	0.782	0.888	0.910425	0.435884	0.996377	27.2	0.9993
SDD	103625	16	67696318	G	A	PARD6A	NP_058644.1	ENSP00000219255	G270E	TRUE	0.108	-2.9475	-2.88	-3.015	0.934753	-0.598453	0.199	1.34	0.076	0.04	0.403934	-0.221424	0.0368943	16.68	0.0895
SDD	103625	7	140501287	T	C	BRAF	NP_004324.2	ENSP00000493543	Q262R	TRUE	0.146	-4.4725	-4.856	-4.089	4.12701	-13.1809					0.888902	0.42945	0.931778	22.9	0.9803
SDD	103631	10	85997342	G	A	LRIT1	NP_056428.1	ENSP00000361177	P75S	FALSE	0.111812	-2.86	-2.923	-2.797	5.329	-1.79499	0.192	0.17	0.311	0.326	0.499431	-0.131196	0.953597	23.5	0.1186
SDD	103637	3	154146734	C	A	GPR149	NP_001033794.1	ENSP00000374390	R224I	FALSE	0.0462633	-3.1255	-3.046	-3.205	3.784	-0.481719	0.006	1.38	0.617	0.203	0.496303	-0.0494013	0.967126	24	0.1431
SDD	103637	5	38418288	G	A	EGFLAM	NP_001192230.1	ENSP00000346964	A539T	FALSE	0	-2.549	-2.799	-2.299	0.227173	1.15886	0.717	-0.95	0.16	0.09	0.247199	-0.428537	0.00576957	4.279	0.0637
SDD	103637	8	12863814	G	A	TRMT9B	NP_065895.2	ENSP00000432695	V35I	FALSE	0.075	-2.707	-2.568	-2.846	7.09051	-3.97917	0.14	1.06	0.704	0.294	0.59319	-0.0365688	0.978705	26.3	0.304
SDD	103676	20	58514613	G	A	PPP1R3D	NP_006233.1	ENSP00000360035	P125L	FALSE	0.026	-3.3755	-3.319	-3.432	7.35773	-4.86592	0.002	0.15	0.566	0.595	0.753775	0.17813	0.998543	29.4	0.8374
SDD	103679	14	38679751	C	T	SSTR1	NP_001040.1	ENSP00000267377	S386F	FALSE	0.994	-4.175	-3.28	-5.07	12.6519	-3.57644	0	-0.63	0.443	0.382	0.732993	0.0395162	0.975169	28.4	0.655
SDD	103708	10	90703583	G	A	ACTA2	NP_001604.1	ENSP00000224784	P114S	TRUE	0.078	-3.386	-2.988	-3.784	4.89874	-6.56361		-4.43	0.679	0.823	0.863542	0.39412	0.9911	28.6	0.9945
SDD	103708	19	49671649	T	C	TRPM4	NP_060106.2	ENSP00000252826	V194A	TRUE	0.208	-3.47	-3.276	-3.664	8.34961	-1.8211	0.001	3.74	0.8	0.299	0.616138	-0.0114665	0.972147	25.1	0.6839
SDD	103722	12	50043302	G	A	FMNL3	NP_944489.2	ENSP00000344311	A701V	FALSE	0.034	-3.409	-3.103	-3.715	6.14099	-5.4412	0.002	2.2	0.782	0.306	0.753191	-0.0411433	0.976946	27.3	0.8348
SDD	103722	16	77228600	G	A	MON1B	NP_001273569.1	ENSP00000444881	G136S	FALSE	0.0322138	-2.9315	-3.188	-2.675	2.625	-3.56816	0.065		0.136	0.201	0.626866	-0.157592	0.456737	22.7	0.0907
SDD	103737	2	189899681	A	C	COL5A2	NP_000384.2	ENSP00000364000	N1438K	FALSE	0.313	-3.4005	-3.204	-3.597	6.13037	-0.951965	0.031	-0.7	0.764	0.453	0.634028	-0.0104575	0.975938	20.9	0.771
SDD	103752	1	44466705	A	G	SLC6A9	NP_964012.2	ENSP00000353791	L526P	TRUE	0.054	-4.2975	-4.494	-4.101	8.8446	-11.4249	0.014	-1.32	0.984	0.922	0.798275	0.448607	0.988453	28.9	0.9989
SDD	103758	12	56536180	G	A	ESYT1	NP_001171725.1	ENSP00000267113	G912R	FALSE	0.49404	-3.32	-3.384	-3.256	3.587	-2.5031	0.11	-1.24	0.409	0.535	0.545952	0.286744	0.717555	27	0.4677
SDD	103758	19	58564970	C	T	ZSCAN1	NP_872378.3	ENSP00000282326	R260C	FALSE	0.199	-3.0095	-3.059	-2.96	2.40277	-1.97952	0.02	3.56	0.183	0.028	0.273268	-0.420717	0.14817	13.62	0.2144
SDD	103765	18	28737381	G	A	DSC1	NP_077739.1	ENSP00000257198	R102W	FALSE	0.769	-3.0165	-3.053	-2.98	3.14551	-3.42827	0.006	0.11	0.228	0.068	0.215401	-0.365021	0.0631711	14.8	0.0897
SDD	103773	5	94619807	G	A	MCTP1	NP_078993.4	ENSP00000424126	S158F	FALSE	0.98	-3.1615	-3.106	-3.217	4.03015	-4.23912	0.019	-1.38	0.285	0.223	0.862209	-0.0304801	0.392886	24	0.1794
SDD	103779	7	81332000	C	T	HGF	NP_000592.3	ENSP00000222390	R695H	FALSE	0.119	-3.7375	-3.492	-3.983	7.07654	-2.04629	0.002	-2.46	0.462	0.691	0.727266	0.106377	0.799389	28	0.4599
SDD	10377	X	129147887	C	T	BCORL1	NP_001366380.1	ENSP00000437775	P380L	FALSE	0.551948	-3.6305	-3.616	-3.645	4.44	-1.14424	0.002	0.8	0.15	0.066	0.778968	-0.401804	0.109467	18.98	0.4565
SDD	103791	15	74726229	G	A	SEMA7A	NP_003603.1	ENSP00000261918	P11S	FALSE	0.995	-2.928	-3.172	-2.684	1.70166	-1.24631	0.153	2.1	0.154	0.022	0.737791	-0.218255	0.211857	22.9	0.0971
SDD	103794	16	77401535	G	A	ADAMTS18	NP_955387.1	ENSP00000282849	P194L	TRUE	0.404	-2.8495	-2.686	-3.013	5.11353	-0.511413	0.08	3.38	0.717	0.337	0.537608	0.0750537	0.967164	24.6	0.098
SDD	1037	16	81944307	A	C	PLCG2	NP_002652.2	ENSP00000482457	N639T	TRUE	0.004	-3.117	-2.737	-3.497	7.98193	0.212505			0.32		0.393828	-0.308316	0.211648	24.2	0.1307
SDD	1037	5	149631371	G	T	CAMK2A	NP_741960.1	ENSP00000261793	P212Q	TRUE	0.001	-6.421	-7.56	-5.282	15.7055	-15.1683	0	1.04	0.938	0.679	0.896418	0.302394	0.99874	28.3	0.9997
SDD	1037	8	134072384	T	G	SLA	NP_006739.2	ENSP00000394049	T48P	TRUE	0.599458	-3.0645	-3.081	-3.048	3.596	1.11276	0.409	-1.07	0.095	0.157	0.281743	-0.0720839	0.0191925	3.114	0.0584
SDD	103807	1	246784772	G	A	CNST	NP_689822.2	ENSP00000355470	V141I	TRUE	0.192	-2.7875	-3.182	-2.393	-0.588257	-0.479841	0.664	2.24	0.018	0.015	0.260727	-0.401976	0.0156691	0.141	0.0694
SDD	103807	2	36583536	C	T	CRIM1	NP_057525.1	ENSP00000280527	A34V	TRUE	0.599	-3.6995	-3.699	-3.7	6.58643	-4.94927	0	-0.05	0.606	0.131	0.932701	-0.00837391	0.976207	23.9	0.7417
SDD	103807	8	123964010	C	T	ZHX2	NP_055758.1	ENSP00000314709	T87M	TRUE	0.196	-4.0305	-4.315	-3.746	6.24597	-9.6414	0	0.61	0.932	0.506	0.764917	0.18178	0.990866	24.8	0.8107
SDD	103813	12	2774001	G	A	CACNA1C	NP_000710.5	ENSP00000382563	G1415R	TRUE	0.101	-5.755	-5.755			-11.6597	0	-4.37	0.916	0.952	0.886655	0.573479	0.999541	29.5
SDD	103813	4	89426967	A	G	HERC5	NP_057407.2	ENSP00000264350	T1005A	TRUE	0.133	-3.719	-3.648	-3.79	9.45312	-4.32677	0.033	0.74	0.259	0.111	0.481981	-0.206023	0.72557	22	0.1177
SDD	10381	12	111744770	G	A	CUX2	NP_056082.2	ENSP00000261726	A302T	TRUE	0.232	-3.461	-3.444	-3.478	4.25476	-1.36745	0.326	0.89	0.318	0.099	0.578068	-0.307748	0.0411484	22.8	0.0878
SDD	10381	X	80001189	C	T	BRWD3	NP_694984.5	ENSP00000362372	R157H	FALSE	0.107754	-4.0325	-4.037	-4.028	8.008	-0.926901	0.122	1.47	0.404	0.219	0.643204	0.210871	0.702571	24.3	0.1135
SDD	103834	X	118694282	T	C	STEEP1	NP_071384.1	ENSP00000494123	H64R	FALSE	0.0269565	-4.1395	-4.376	-3.903	2.729	-2.4279						0.240734	0.908124	21.5	0.9262
SDD	10384	8	125022835	A	T	FER1L6	NP_001034201.2	ENSP00000428280	N568Y	FALSE	0.101	-3.34	-3.265	-3.415	4.98145	0.0779228	0.465	-1.52	0.857	0.527	0.710817	0.263545	0.676169	22.7	0.1101
SDD	103850	15	75932486	G	T	IMP3	NP_060755.1	ENSP00000385217	H8Q	FALSE	0.71	-3.1265	-2.83	-3.423	8.11914	-4.61895	0	0.95	0.692	0.335	0.889763	0.0685995	0.999557	24.9	0.9522
SDD	103854	6	101037610	C	T	ASCC3	NP_006819.2	ENSP00000358159	R1817Q	TRUE	0.153628	-3.554	-3.642	-3.466	6.904	-2.15015	0.027	-0.09	0.682	0.343	0.567955	-0.177427	0.685941	25.9	0.1453
SDD	10387	1	164761796	A	G	PBX1	NP_002576.1	ENSP00000405890	M111V	TRUE	0.044	-4.637	-4.383	-4.891	8.7312	-9.52493	0	1.07	0.731	0.552	0.849102	0.297351	0.981936	25.9	0.9984
SDD	103890	1	22927532	G	A	EPHA8	NP_065387.1	ENSP00000166244	A894T	FALSE	0.205002	-2.7765	-2.773	-2.78	2.367	0.59814	0.001	0.06	0.182	0.081	0.320733	-0.142563	0.599151	19.05	0.06
SDD	10390	12	48250952	G	T	VDR	NP_001017535.1	ENSP00000449573	D181E	TRUE	0.151	-2.7325	-2.772	-2.693	0.584839	-0.680409	0.515	-3.48	0.07	0.325	0.290511	0.0212412	0.102822	6.114	0.0883
SDD	103939	20	31692670	G	A	BPIFB4	NP_872325.2	ENSP00000364632	A579T	FALSE	0.164179	-3.2535	-3.307	-3.2	2.986	-2.4001	0.369	3.01	0.277	0.06	0.385142	-0.374457	0.037372	17.13	0.1098
SDD	103969	15	27572022	A	G	GABRG3	NP_150092.2	ENSP00000479113	M113V	TRUE	0.129	-3.368	-3.198	-3.538	4.80383	-4.88001			0.482		0.801367	-0.000277945	0.100215	22	0.1336
SDD	103969	1	202718257	C	A	KDM5B	NP_006609.3	ENSP00000356234	G611V	TRUE	0.007	-3.741	-3.801	-3.681	8.45142	-8.94626	0	-0.46	0.976	0.881	0.808506	0.401012	0.999711	26.3	0.998
SDD	103969	4	114438787	C	T	CAMK2D	NP_742113.1	ENSP00000369098	G210R	TRUE	0.00818515	-4.7575	-5.01	-4.505	6.948	-12.24	0	1.11	0.916	0.826	0.946559	0.344781	0.99966	26.3	0.9999
SDD	103986	11	17742891	C	T	MYOD1	NP_002469.2	ENSP00000250003	P267S	FALSE	0.314	-2.824	-2.668	-2.98	3.93494	-0.8205	0.105	-4.57	0.422	0.258	0.625638	0.0753823	0.745944	22.5	0.0894
SDD	10399	10	32576118	G	C	EPC1	NP_079485.1	ENSP00000263062	Q354E	FALSE	0.112934	-3.2995	-3.042	-3.557	6.536	-0.405753	0.149	-0.1	0.409	0.127	0.48719	0.0224595	0.745966	21.5	0.1072
SDD	104011	5	33576461	G	C	ADAMTS12	NP_112217.2	ENSP00000422554	Q1224E	FALSE	0.884	-3.2315	-3.217	-3.246	2.56372	0.526921	1	0.33	0.298	0.111	0.231569	-0.069066	0.187382	15.72	0.0707
SDD	10402	10	71142311	C	T	HK1	NP_000179.2	ENSP00000352398	S445L	TRUE	0.017	-4.0665	-4.191	-3.942	5.7807	-7.31596	0	-4.31	0.892	0.924	0.812821	0.524145	0.997648	29.3	0.9236
SDD	10402	12	120660454	G	A	PXN	NP_001230685.1	ENSP00000267257	T198M	TRUE	0.469	-3.349	-3.363	-3.335	2.85999	-1.66393	0.084	0.87	0.132	0.031	0.260601	-0.475062	0.0125041	14.18	0.072
SDD	104036	5	56246457	G	A	MIER3	NP_001284527.1	ENSP00000370624	P11L	FALSE	0.907298	-3.577	-3.233	-3.921	7.556	-0.3264	0.005	2.31	0.583	0.26	0.908535	0.0525591	0.700675	35	0.9328
SDD	104059	5	108691621	T	C	PJA2	NP_055634.3	ENSP00000354775	M587V	FALSE	0.054386	-4.0205	-4.363	-3.678	3.659	-5.51416	0.078	2.73	0.304	0.181	0.614183	0.0807637	0.871307	23.7	0.8525
SDD	104065	1	159860380	A	C	CFAP45	NP_036469.2	ENSP00000357079	I54M	FALSE	0.628	-3.0375	-2.935	-3.14	4.19092	-1.07584	0.012	0.86	0.238	0.067	0.340232	-0.216883	0.157292	6.045	0.083
SDD	104068	9	125377845	G	A	OR1Q1	NP_036496.1	ENSP00000297913	V277M	FALSE	-1	-2.487	-2.487			1.41918	1	8.7	0.075	0.117	0.186783	-0.545088	0.016235	1.197	0.1093
SDD	104072	11	111708221	C	T	ALG9	NP_001071159.1	ENSP00000435517	R310Q	TRUE	0.022	-3.684	-3.534	-3.834	8.93805	-3.94176	0	-1.16	0.682	0.682	0.643348	0.374153	0.999312	28
SDD	104081	18	51750461	G	A	MBD2	NP_003918.1	ENSP00000256429	P157S	TRUE	0.33	-3.201	-3.499	-2.903	2.51453	-2.58413	0.041	-3.99	0.259	0.54	0.920698	0.173233	0.485521	23.1	0.2676
SDD	104081	2	241817032	C	A	AGXT	NP_000021.1	ENSP00000302620	L309I	TRUE	0.025	-3.1785	-3.209	-3.148	5.63559	-4.94053	0.148	-3.27	0.456	0.624	0.550313	0.135673	0.759922	23	0.1969
SDD	104081	4	37448316	G	A	NWD2	NP_001138462.1	ENSP00000309501	R1569Q	TRUE	0.045	-3.4065	-3.516	-3.297	2.15137	-0.6215	0.121	1.6	0.306	0.18	0.522491	-0.358377	0.0903261	23	0.0849
SDD	1040	3	51989981	G	C	GPR62	NP_543141.3	ENSP00000319250	G105R	FALSE	0.002	-3.4625	-3.585	-3.34	7.0097	-4.9477	0.038	1.22	0.371	0.122	0.961444	-0.115998	0.491992	23	0.9841
SDD	104109	6	139228693	C	T	REPS1	NP_001273540.1	ENSP00000392065	R754H	FALSE	0.38	-3.8065	-4.068	-3.545	5.1358	-11.1302	0.003	1.43	0.719	0.249	0.859342	0.122615	0.983091	31	0.5579
SDD	104118	9	79117616	C	T	GCNT1	NP_001091102.1	ENSP00000390703	R107C	FALSE	0.09	-3.747	-3.717	-3.777	11.4615	-7.9636	0	0.37	0.248	0.281	0.470749	-0.0195672	0.959751	24.8	0.3813
SDD	104121	21	47545977	C	G	COL6A2	NP_001840.3	ENSP00000300527	R750G	TRUE	0.083	-2.514	-2.779	-2.249	-0.759766	-1.89105	0.562	-1.8	0.256	0.187	0.277828	-0.0523384	0.0259227	13.82	0.0737
SDD	104124	2	178301768	T	C	AGPS	NP_003650.1	ENSP00000264167	I208T	TRUE	0.029	-3.9125	-3.897	-3.928	5.96948	-6.8763	0.023	-1.64	0.687	0.661	0.662794	0.0496983	0.78512	26.4	0.3024
SDD	104124	3	160073926	A	G	IFT80	NP_065851.1	ENSP00000312778	Y218H	TRUE	0.112	-3.306	-3.076	-3.536	5.39758	-2.1308	0.017	1.61	0.509	0.129	0.650419	-0.141503	0.801391	23.9	0.1849
SDD	104127	1	45504677	T	C	ZSWIM5	NP_065934.1	ENSP00000352614	I609V	FALSE	0	-3.153	-3.033	-3.273	1.35181	0.573194	0.246	0.56	0.111	0.1	0.408739	-0.153397	0.870251	18.01	0.0711
SDD	104127	2	39070238	C	G	DHX57	NP_945314.1	ENSP00000405111	R778S	FALSE	0.791	-2.9845	-2.983	-2.986	2.39478	0.501015			0.535		0.390388	0.124494	0.140341	15.1	0.5478
SDD	10412	X	15841037	A	G	ZRSR2	NP_005080.1	ENSP00000303015	Y374C	FALSE	0.103	-3.7365	-3.435	-4.038	8.41138	-2.33224	0.023		0.328	0.183	0.351837	-0.172918	0.780194	24.2	0.0743
SDD	104130	19	11134270	G	A	SMARCA4	NP_001122317.1	ENSP00000496635	R979Q	TRUE	0.007	-5.967	-5.75	-6.184	10.8735	-12.2311					0.881328	0.57968	0.999507	32	0.9844
SDD	104136	16	50583462	C	A	NKD1	NP_149110.1	ENSP00000268459	T63N	TRUE	0.282	-3.0585	-3.01	-3.107	1.98328	-0.668929	0.289	-0.05	0.501	0.069	0.598002	-0.129651	0.411915	22.2	0.105
SDD	104136	1	26784371	G	A	DHDDS	NP_079163.2	ENSP00000353104	R211Q	TRUE	0.014	-4.7705	-4.674	-4.867	10.4445	-12.0719	0	-0.53	0.97	0.889	0.714059	0.407563	0.999809	32	0.9925
SDD	104139	17	42153097	G	A	G6PC3	NP_612396.1	ENSP00000269097	V243M	FALSE	0.15	-2.8815	-3.315	-2.448	-1.40128	-1.06429	0.621	-1	0.058	0.177	0.281896	-0.409917	0.0408912	0.001	0.0739
SDD	104142	11	85375136	C	T	CREBZF	NP_001034707.1	ENSP00000433459	E262K	FALSE	0	-3.576	-3.946	-3.206	3.21014	-4.04338	0.026	0.67	0.219	0.049	0.835757	-0.0642638	0.957469	23.8	0.7071
SDD	104146	16	84442083	G	A	ATP2C2	NP_001273456.2	ENSP00000397925	A134T	FALSE	-1	-2.414	-2.349	-2.479	4.76196	-5.86178	0.015	-2.67	0.833	0.789	0.472811	0.267702	0.982964	26.8	0.2292
SDD	104146	7	92210875	T	C	FAM133B	NP_690002.2	ENSP00000398401	I23V	FALSE	0.0297297	-2.9685	-3.161	-2.776	1.033	1.74529	0.167	0.86	0.046	0.037	0.308824	-0.388217	0.0479757	10.8	0.0544
SDD	104146	8	59490656	A	C	SDCBP	NP_001007068.1	ENSP00000260130	D156A	FALSE	0.006	-4.2065	-5.134	-3.279	13.2678	-13.026	0.001	-0.78	0.979	0.761	0.687595	0.430017	0.999639	29.4	0.9979
SDD	104151	9	140137742	C	T	TUBB4B	NP_006079.1	ENSP00000341289	P358S	FALSE	0.126	-3.9925	-3.939	-4.046	5.44788	-9.15216		-2.52	0.734	0.814	0.814888	0.337813	0.997187	24.8	0.9471
SDD	10417	1	92445290	G	C	BRDT	NP_001229735.2	ENSP00000387822	K425N	FALSE	0.002	-3.097	-3.145	-3.049	1.72644	0.525385	0.115	2.71	0.072	0.039	0.249243	-0.382787	0.101892	11.42	0.1861
SDD	10417	7	74489427	C	A	RCC1L	NP_110425.2	ENSP00000480364	Q49H	FALSE	0.506024	-3.153	-2.688	-3.618	9.933	-2.09032			0.315		0.906818	-0.0210463	0.960486	22.7	0.3096
SDD	104203	5	74655858	C	T	HMGCR	NP_000850.1	ENSP00000287936	R836W	FALSE	0.07	-3.977	-3.696	-4.258	10.6135	-7.1482	0.014	0.83	0.713	0.327	0.756465	0.108659	0.997146	31	0.2613
SDD	104214	16	20696700	G	T	ACSM1	NP_443188.2	ENSP00000301956	A73D	FALSE	0.155183	-4.441	-4.744	-4.138	10.991	-11.6611	0	0.16	0.86	0.684	0.585375	0.364037	0.998439	25.5	0.9123
SDD	104217	5	96129543	C	G	ERAP1	NP_057526.3	ENSP00000296754	G346A	FALSE	0.023	-3.315	-3.275	-3.355	4.41833	-4.59616	0.48	4.31	0.083	0.022	0.385929	-0.329074	0.0945012	6.173	0.0822
SDD	104224	4	39839556	T	G	PDS5A	NP_001093869.1	ENSP00000303427	E1310D	FALSE	0.823666	-3.549	-3.529	-3.569	5.149	-0.242791	0.067		0.42	0.048	0.477882	-0.13082	0.327695	17.84	0.0717
SDD	104227	19	1422377	G	A	DAZAP1	NP_061832.2	ENSP00000233078	E149K	FALSE	0.009	-4.3915	-5.186	-3.597	5.95575	-11.3808	0.032	-2.01	0.612	0.511	0.912292	0.132921	0.976544	25.8	0.9549
SDD	10422	20	30734620	C	T	TM9SF4	NP_055557.2	ENSP00000381104	R306W	FALSE	0.011	-3.907	-3.605	-4.209	7.64917	-7.68117	0.005	0.76	0.822	0.464	0.872363	0.194113	0.99422	26.6	0.7564
SDD	104239	5	140908799	C	A	DIAPH1	NP_005210.3	ENSP00000373706	M906I	FALSE	0	-3.189	-3.026	-3.352	1.58472	0.169032			0.203	0.116	0.548391	-0.155341	0.6095	21.2	0.3995
SDD	104252	19	4180786	C	T	SIRT6	NP_057623.2	ENSP00000337332	D63N	FALSE	0.012	-3.6835	-3.605	-3.762	10.7303	-9.93126	0	1.69	0.954	0.57	0.826897	-0.196422	0.967748	28.4	0.9819
SDD	104252	6	19838159	C	G	ID4	NP_001537.1	ENSP00000367972	D58E	FALSE	0.091	-2.193	-2.344	-2.042	-1.49094	1.07623	0.419	-0.98	0.081	0.136	0.890406	-0.19582	0.277298	15.93	0.0888
SDD	104255	1	211652669	C	A	RD3	NP_898882.1	ENSP00000355969	R99S	FALSE	0.002	-3.158	-3.11	-3.206	5.98586	-0.730523	0.002	2.19	0.755	0.381	0.63112	0.153861	0.989159	33	0.8121
SDD	104258	2	172325400	A	C	DCAF17	NP_079276.2	ENSP00000364404	M281L	TRUE	0.015	-2.9385	-3.138	-2.739	-0.373108	1.63164	0.222	1.1	0.217	0.036	0.249084	-0.211554	0.10806	0.314	0.0874
SDD	104268	15	72558258	A	T	PARP6	NP_001310461.1	ENSP00000456348	S52R	FALSE	0.254743	-3.294	-2.931	-3.657	4.618	-5.79053	0.023		0.708		0.687449	-0.00240495	0.788147	22.2	0.6976
SDD	104268	1	9673094	G	A	TMEM201	NP_001124396.2	ENSP00000344503	A652T	FALSE	0.381	-3.1265	-3.037	-3.216	2.27466	-2.71653	0.099		0.285	0.081	0.321077	-0.155975	0.0799596	22	0.0901
SDD	104270	9	140008729	G	A	DPP7	NP_037511.2	ENSP00000360635	A96V	FALSE	0.056	-2.8745	-2.941	-2.808	6.09088	-3.19477	0.03	-2.93	0.202	0.328	0.568787	0.0621822	0.113591	14.81	0.1415
SDD	104274	18	77895490	C	G	ADNP2	NP_055728.1	ENSP00000262198	L732V	FALSE	0.0107034	-3.2865	-3.139	-3.434	7.174	-0.512642	0.563		0.384	0.036	0.452035	-0.1344	0.240029	11.72	0.1808
SDD	104289	12	66814552	G	A	GRIP1	NP_066973.2	ENSP00000381098	P544S	FALSE	0.008	-3.2815	-3.177	-3.386	4.04272	-3.32326	0.341	-1.58	0.491	0.43	0.638717	0.020153	0.521569	22.9	0.1197
SDD	10428	12	57919677	C	T	MBD6	NP_443129.3	ENSP00000347896	T309M	FALSE	0.258	-3.1265	-3.023	-3.23	-0.0288086	-1.54862	0.001		0.231	0.019	0.527802	-0.422687	0.0351123	18.36	0.1183
SDD	10428	5	168175347	G	A	SLIT3	NP_001258875.2	ENSP00000332164	R744C	FALSE	0.002	-3.4925	-3.831	-3.154	4.66699	-5.70953	0.001	-4.02	0.547	0.534	0.304959	0.207649	0.974603	29.5	0.1751
SDD	104293	7	75189041	A	T	HIP1	NP_005329.3	ENSP00000336747	I457K	FALSE	0.022	-3.5465	-3.392	-3.701	5.96875	-2.83861	0.159	2.67	0.873	0.243	0.749829	0.170556	0.888184	22.7	0.6764
SDD	104305	12	113875855	G	A	SDSL	NP_001291922.1	ENSP00000385790	A321T	FALSE	0.392	-2.92	-2.754	-3.086	4.67816	-0.816169	0.568		0.167	0.007	0.287769	-0.101655	0.0991738	13.34	0.0723
SDD	104305	22	42289229	C	T	SREBF2	NP_004590.2	ENSP00000354476	R773W	FALSE	0.026	-3.353	-3.481	-3.225	5.00317	-1.60981	0.011	3.13	0.688	0.183	0.573113	-0.2933	0.302451	28.4	0.1444
SDD	104323	11	640514	G	A	DRD4	NP_000788.2	ENSP00000176183	V391I	FALSE	0.473	-2.2965	-1.994	-2.599	5.7533	-1.33148	0.004	1.2	0.391	0.142	0.697776	-0.136909	0.956968	26.1	0.1292
SDD	104323	8	38173456	C	T	NSD3	NP_075447.1	ENSP00000313983	D654N	FALSE	0.007	-3.851	-3.588	-4.114	5.35474	-0.943244	0.257	-3.62	0.557	0.383	0.789418	0.0458197	0.712398	24.6	0.692
SDD	104338	17	64299133	A	G	PRKCA	NP_002728.2	ENSP00000408695	D55G	FALSE	0.945	-4.044	-3.78	-4.308	7.59973	-6.21364	0.015	-2	0.754	0.75	0.82512	0.210628	0.993653	31	0.9952
SDD	104341	16	70530270	C	T	COG4	NP_056201.2	ENSP00000315775	G516R	TRUE	0.812	-3.1445	-2.785	-3.504	7.01208	-0.63197	0.045	0.81	0.912	0.378	0.862272	0.223003	0.981871	25.1
SDD	104352	14	96851984	A	G	GSKIP	NP_001258835.1	ENSP00000412315	Q128R	FALSE	0.109	-3.262	-3.29	-3.234	3.90097	-0.110152	0.174		0.339	0.057	0.645452	-0.0613204	0.273311	22.3	0.1304
SDD	104370	11	6129315	T	G	OR56B4	NP_001005181.1	ENSP00000321196	C103G	FALSE	0.04	-4.0275	-4.364	-3.691	9.38922	-9.83471	0.001	-0.03	0.825	0.585	0.349518	0.360019	0.99993	25.6	0.3782
SDD	104392	1	182026362	G	C	ZNF648	NP_001009992.1	ENSP00000344129	P262A	FALSE	0.02	-3.029	-3.07	-2.988	3.00806	-0.289066	0.462	3.31	0.061	0.016	0.574642	-0.375966	0.0637735	1.315	0.0782
SDD	104399	9	130430439	G	C	STXBP1	NP_003156.1	ENSP00000362399	R292P	TRUE	0.001	-6.9585	-7.863	-6.054	12.6623	-14.2771	0	-1.45	0.974	0.922	0.89504	0.44334	0.996114	32	0.9995
SDD	104402	4	160252933	G	A	RAPGEF2	NP_055062.1	ENSP00000264431	S415N	FALSE	0.0787966	-3.594	-3.764	-3.424	4.02	-2.02329	0.264	1.66	0.417	0.095	0.692599	-0.252267	0.732144	22.4	0.1873
SDD	104405	3	97887926	A	T	OR5H15	NP_001005515.1	ENSP00000493082	K128I	FALSE	0.0163744	-3.1395	-3.036	-3.243	6.007	-5.69565					0.204054	-0.167729	0.879395	22.5	0.3766
SDD	104405	9	100678498	A	G	TRMO	NP_057565.3	ENSP00000364260	F67L	FALSE	0.145	-3.1695	-2.933	-3.406	9.90753	-6.98739	0.006	1.79	0.759	0.288		-0.044611	0.99078	27.7	0.9944
SDD	10440	12	57108168	C	T	NACA	NP_001352825.1	ENSP00000403817	R1934Q	FALSE	0.248677	-4.638	-5.434	-3.842	8.653	-10.3655	0.001	-0.05	0.633	0.612	0.805935	0.305093	0.956787	32	0.9833
SDD	10440	8	124031444	G	A	DERL1	NP_077271.1	ENSP00000259512	P203L	FALSE	0.084	-4.506	-4.415	-4.597	15.8503	-9.74916	0	1.2	0.944	0.591	0.820906	0.195887	0.999685	31	0.9866
SDD	104417	2	120366104	T	A	CFAP221	NP_001257978.2	ENSP00000393222	M387K	FALSE	0.0246679	-3.1185	-2.69	-3.547	9.121	1.63213	0.024	2.35	0.571	0.11	0.309569	-0.143192	0.558497	21.2	0.1869
SDD	104423	16	67576640	G	A	RIPOR1	NP_001180453.1	ENSP00000389456	V665I	FALSE	0.62103	-3.1535	-3.318	-2.989	1.997	-0.781124		2.44	0.054		0.191919	-0.316916	0.0440466	0.827	0.0766
SDD	104423	5	140019372	T	C	TMCO6	NP_001287909.1	ENSP00000252100	L45P	FALSE	0.32	-3.6505	-3.643	-3.658	4.23047	-4.94236	0.007	1.5	0.767	0.328	0.530871	0.15922	0.923963	32	0.3114
SDD	10442	1	151384861	T	A	POGZ	NP_055915.2	ENSP00000271715	I564F	TRUE	0.046	-4.2265	-4.332	-4.121	8.07971	-4.43688	0	1.58	0.693	0.407	0.862294	0.0896162	0.996082	29.4	0.9973
SDD	104439	10	135044286	C	T	UTF1	NP_003568.2	ENSP00000305906	P165L	FALSE	0.052	-2.936	-2.722	-3.15	5.74963	-1.69132	0	1.78	0.265	0.033	0.857965	-0.207275	0.408449	20.5	0.1311
SDD	104445	X	153296116	G	T	MECP2	NP_001104262.1	ENSP00000395535	P400Q	FALSE	0.583	-2.9505	-3.138	-2.763	2.53149	-3.49838	0.001	-2.62	0.364	0.458	0.477516	0.0940397	0.153677	18	0.0732
SDD	104449	2	171573882	G	A	SP5	NP_001003845.1	ENSP00000364430	G389R	FALSE	0.555	-2.96	-2.92	-3	5.53784	-2.11206	0.036	2.92	0.401	0.109	0.694788	-0.0891651	0.707264	24.4	0.3821
SDD	104449	3	49159424	G	A	LAMB2	NP_002283.3	ENSP00000307156	R1626W	FALSE	0.213	-3.518	-3.518			-3.99077	0.04	1.29	0.169	0.076	0.207786	-0.391856	0.684588	23.3	0.0934
SDD	104460	22	38468516	C	T	PICK1	NP_036539.1	ENSP00000349465	R197W	FALSE	0.005	-4.029	-4.124	-3.934	5.86951	-9.42268	0.001	-1.21	0.957	0.852	0.91155	0.315312	0.993451	32	0.854
SDD	104462	4	170400658	C	T	NEK1	NP_036356.1	ENSP00000408020	D651N	TRUE	0.019	-3.1275	-3.332	-2.923	2.44659	-0.417894	0.265	-0.3	0.116	0.124	0.394322	-0.220237	0.277255	23	0.0832
SDD	104472	11	65978677	C	T	PACS1	NP_060496.2	ENSP00000316454	R203W	TRUE	0.105	-5.0575	-5.55	-4.565	9.23834	-11.6244	0	1.16	0.974	0.443	0.915627	0.259086	0.996643	26.9	0.9984
SDD	104472	15	30020161	T	C	TJP1	NP_783297.2	ENSP00000441202	I694V	TRUE	0.0181715	-3.3255	-3.345	-3.306	5.444	-1.83542	0.395	0.94	0.533	0.316	0.806602	-0.212246	0.178061	23.5	0.2916
SDD	104517	17	80008598	C	G	RFNG	NP_002908.1	ENSP00000307971	R120P	FALSE	0.069	-3.5315	-3.673	-3.39	7.23688	-8.43979	0.002	-0.26	0.931	0.588	0.750886	0.194166	0.997715	27	0.3828
SDD	104542	2	38201199	A	G	RMDN2	NP_001164262.1	ENSP00000346549	T157A	FALSE	0.323676	-3.0365	-2.785	-3.288	7.789	-2.20095	0.445	0.69	0.618	0.103	0.427379	-0.0846846	0.940771	26	0.1781
SDD	104555	11	66617415	C	T	PC	NP_000911.2	ENSP00000377530	R964H	TRUE	0.045	-3.6735	-3.38	-3.967	11.2391	-5.60931	0.001	-3.96	0.782	0.888	0.526967	0.379006	0.976803	25.1	0.6377
SDD	104555	12	111729303	G	A	CUX2	NP_056082.2	ENSP00000261726	R128Q	TRUE	0.381	-3.0385	-3.258	-2.819	-0.0966797	-0.34454	0.648	1.01	0.257	0.031	0.423918	-0.290237	0.0623588	16.82	0.0665
SDD	104555	8	95906324	T	C	CCNE2	NP_477097.1	ENSP00000309181	Q13R	TRUE	0.695	-3.232	-3.36	-3.104	-0.205078	-1.29982	0.024	1.87	0.192	0.083	0.421175	-0.151427	0.697448	22.7	0.0952
SDD	104566	20	3766287	C	A	CENPB	NP_001801.1	ENSP00000369075	D282Y	FALSE	0	-4.7625	-5.683	-3.842	5.34521	-7.82709	0.001	0.69	0.85	0.399	0.819235	0.213901	0.997647	27.4	0.9943
SDD	104573	9	139943246	C	T	ENTPD2	NP_982293.1	ENSP00000347213	D451N	FALSE	0.437	-2.994	-2.889	-3.099	6.35559	-4.6246	0.003	2.76	0.133	0.129	0.59501	-0.226851	0.46823	25.5	0.1089
SDD	104579	11	57461269	C	G	ZDHHC5	NP_056272.2	ENSP00000287169	P256R	FALSE	0.003	-3.097	-3.116	-3.078	4.87341	-0.957562	0.05	1.22	0.409	0.208	0.627239	0.111433	0.785173	21.6	0.0902
SDD	104579	X	48846402	A	T	GRIPAP1	NP_064522.4	ENSP00000365606	L235Q	FALSE	0.172093	-4.1325	-4.259	-4.006	6.039	-7.30135			0.553	0.135	0.745353	0.255323	0.947038	26.9	0.5882
SDD	104593	16	31474189	G	A	ARMC5	NP_001098717.1	ENSP00000268314	E441K	FALSE	0.058	-3.0875	-3.129	-3.046	1.85242	-2.2819	0.497	2	0.55	0.075	0.818091	-0.106492	0.750983	24.4	0.2109
SDD	104600	11	533919	A	G	HRAS	NP_005334.1	ENSP00000309845	I46T	TRUE	0.066	-3.6405	-3.677	-3.604	6.96948	-11.7956	0	-0.56	0.929	0.732	0.876214	0.279671	0.998607	26	0.983
SDD	104600	14	105718845	T	C	BRF1	NP_001510.2	ENSP00000448387	I181M	TRUE	0.051	-2.855	-2.76	-2.95	5.62714	-6.78677			0.737		0.769054	0.0428774	0.941284	23.7	0.6241
SDD	104606	X	39933215	C	A	BCOR	NP_060215.4	ENSP00000380512	A462S	FALSE	0.037	-3.9545	-3.482	-4.427	8.88818	0.651038	0.021	2.51	0.19	0.049	0.456582	-0.252935	0.387237	17.3	0.1096
SDD	104625	6	25726467	G	A	H2AC1	NP_734466.1	ENSP00000297012	L97F	FALSE	0.057	-1.9135	-1.891	-1.936	4.38264	-7.48396	0.001	-0.31	0.825	0.435	0.700447	0.103192	0.846589	18.66	0.6757
SDD	104634	19	38056894	G	T	ZNF571	NP_001277243.1	ENSP00000351594	Q146K	FALSE	0.125	-2.875	-2.678	-3.072	-1.23462	3.42059	1	3.29	0.066	0.16	0.229005	-0.475081	0.0163858	0.136	0.0572
SDD	104638	9	112185089	C	T	PTPN3	NP_002820.3	ENSP00000363667	V349M	FALSE	0.157	-3.306	-3.135	-3.477	5.72436	-2.58874	0.073	-1.59	0.508	0.211	0.652409	-0.138584	0.234701	22.2	0.2107
SDD	104643	3	38662449	C	T	SCN5A	NP_932173.1	ENSP00000328968	A166T	FALSE	0.119	-3.216	-3.216		4.04077	-4.13991	0.006	-5.04	0.695	0.801	0.754479	0.0140822	0.309609	27.1	0.2138
SDD	104652	5	72469122	G	A	TMEM174	NP_694949.1	ENSP00000296776	V18I	FALSE	0.152	-3.055	-2.997	-3.113	1.89856	-0.774541	0.387		0.203	0.01	0.540796	-0.392974	0.0353758	15.36	0.0927
SDD	104659	12	32832346	A	G	DNM1L	NP_036192.2	ENSP00000450399	T17A	TRUE	0.132	-3.666	-3.55	-3.782	3.26379	-5.36188	0.199	-2.6	0.355	0.294	0.852045	0.12415	0.812527	23	0.2503
SDD	104680	5	148756398	G	A	IL17B	NP_055258.1	ENSP00000261796	A71V	FALSE	0	-3.275	-3.24	-3.31	1.18387	-1.03847	0.313	0.47	0.131	0.095	0.377513	-0.14691	0.297876	21.1	0.0996
SDD	104688	1	14106971	A	G	PRDM2	NP_036363.2	ENSP00000235372	N894S	FALSE	0.007	-3.18	-2.962	-3.398	5.07959	0.930212	0.001	4.72	0.609	0.15	0.542443	-0.311564	0.570069	23.5	0.1027
SDD	104693	19	2191113	G	A	DOT1L	NP_115871.1	ENSP00000381657	E123K	FALSE	0.0992593	-3.938	-4.123	-3.753	10.453	-3.21686	0.027	2.02	0.72	0.468	0.911144	0.0866784	0.970339	31	0.9792
SDD	104693	3	137786493	G	A	DZIP1L	NP_775814.2	ENSP00000332148	R628C	FALSE	0.14	-3.2705	-3.445	-3.096	5.67188	-2.89469	0.068	1.13	0.222	0.112	0.268399	-0.562836	0.0262793	17	0.0943
SDD	104711	7	141463976	G	C	TAS2R3	NP_058639.1	ENSP00000247879	E6D	FALSE	0.473156	-2.954	-3.043	-2.865	2.94	-0.616581	0.384	5.65	0.066	0.006	0.266961	-0.264716	0.175996	0.069	0.1693
SDD	104717	16	58713832	C	T	SLC38A7	NP_060701.1	ENSP00000219320	A67T	FALSE	0.082	-3.2945	-3.281	-3.308	5.29584	-1.62958	0	4.17	0.809	0.462	0.702451	0.21656	0.993124	23.2	0.9535
SDD	104720	1	74716407	G	A	TNNI3K	NP_057062.1	ENSP00000322251	R96Q	FALSE	0.232	-2.816	-2.949	-2.683	-1.58148	-2.12162	0.043	2.4	0.659	0.187		-0.158482	0.385263	22.5	0.2826
SDD	104738	10	94836813	C	T	CYP26A1	NP_000774.2	ENSP00000224356	P416S	FALSE	0.017	-3.69	-3.69			-8.29331	0	-1.41	0.865	0.925	0.605585	0.428805	0.999684	26.2	0.9664
SDD	104784	12	67705561	G	A	CAND1	NP_060918.2	ENSP00000442318	R1150H	FALSE	-1	-4.238	-4.238			-2.04027	0.052	-0.29	0.45	0.508	0.782371	0.154882	0.978594	32	0.37
SDD	104792	6	5545428	G	A	FARS2	NP_006558.1	ENSP00000274680	R307Q	TRUE	0.062	-2.9375	-2.855	-3.02	1.63321	-2.51492	0.157	-0.05	0.314	0.119	0.236474	-0.356503	0.0411241	17.72	0.0673
SDD	104810	16	53706816	T	C	RPGRIP1L	NP_056087.2	ENSP00000493946	H332R	TRUE	0.079	-3.058	-3.093	-3.023	1.7821	0.524506					0.309526	-0.113269	0.350588	15.76	0.081
SDD	104810	7	12683766	G	C	SCIN	NP_001106177.1	ENSP00000297029	D529H	TRUE	0.212503	-2.889	-2.793	-2.985	5.532	-4.48275	0.041	0.46	0.747	0.264	0.638454	0.124464	0.98246	27.3	0.1668
SDD	104825	19	18895852	T	C	COMP	NP_000086.2	ENSP00000222271	T590A	TRUE	0.048	-3.5345	-3.495	-3.574	5.88611	-6.98616	0.031	-3.7	0.845	0.804	0.757501	0.201912	0.990957	27.2	0.7036
SDD	104835	3	12653557	T	C	RAF1	NP_002871.1	ENSP00000251849	N71S	TRUE	0.591	-3.476	-2.966	-3.986	7.05774	-2.22373	0.466	-0.79	0.396	0.194	0.769439	-0.441197	0.0241762	14.18	0.1357
SDD	104848	11	64785883	G	A	ARL2	NP_001658.2	ENSP00000246747	G38E	FALSE	0.0708234	-3.373	-3.244	-3.502	6.077	-6.61685	0.094	-1.65	0.41	0.556	0.687599	0.113889	0.956571	23.2	0.6837
SDD	104856	2	228119406	G	T	COL4A3	NP_000082.2	ENSP00000379823	G288V	TRUE	0.461	-4.093	-4.35	-3.836	10.4456	-4.89057	0	-5.77	0.899	0.968	0.530416	0.55552	0.999834	25.6	0.423
SDD	104890	10	118220485	C	A	PNLIPRP3	NP_001011709.2	ENSP00000358232	D191E	FALSE	0.003	-3.6605	-3.722	-3.599	7.32782	-6.88318	0	-4.28	0.828	0.776	0.55359	0.343378	0.993522	22.3	0.9315
SDD	104890	11	119002621	C	G	HINFP	NP_945322.1	ENSP00000318085	P202R	FALSE	0.019	-4.011	-4.011			-10.55	0.019	1.71	0.875	0.4	0.893144	0.237829	0.995339	25.9	0.7228
SDD	104890	14	24731437	C	T	TGM1	NP_000350.1	ENSP00000206765	R41H	FALSE	0.952	-3.316	-3.191	-3.441	6.75098	-3.25227	0.063	-1.52	0.524	0.391	0.582243	0.103286	0.743409	24.5	0.1334
SDD	104890	17	39551178	T	A	KRT31	NP_002268.2	ENSP00000251645	Q340L	FALSE	0.072	-3.312	-3.195	-3.429	6.61725	-8.23032	0.009	-2.78	0.579	0.49	0.353028	0.135865	0.970495	23	0.3371
SDD	104899	14	21511542	G	A	RNASE7	NP_115961.3	ENSP00000298690	V131I	FALSE	0.031	-1.8265	-2.576	-1.077	-3.3465	0.563107	1	-0.72	0.048	0.085	0.285515	-0.357093	0.0374477	2.416	0.0695
SDD	104899	19	38597236	C	A	SIPA1L3	NP_055888.1	ENSP00000222345	H697N	FALSE	0.019	-4.2765	-4.699	-3.854	10.1638	-11.0382	0.001	-4.14	0.932	0.935	0.89769	0.300445	0.998774	25.9	0.9969
SDD	104899	9	90322101	C	T	DAPK1	NP_004929.2	ENSP00000386135	T1372I	FALSE	0.243	-3.5965	-3.509	-3.684	5.75879	-2.39504	0.002	-2.49	0.477	0.705	0.701772	0.396175	0.954347	25	0.5367
SDD	104904	18	48604664	C	T	SMAD4	NP_005350.1	ENSP00000341551	R496C	TRUE	0.222	-4.9885	-4.743	-5.234	10.3367	-9.58118	0.002	-5.21	0.928	0.961	0.921994	0.552361	0.988963	32	0.9991
SDD	104904	4	129924987	G	T	SCLT1	NP_653244.2	ENSP00000281142	A112D	TRUE	0.158	-3.0805	-2.809	-3.352	4.52783	0.335519	0.077	2.95	0.184	0.019	0.318804	-0.271998	0.100566	17.25	0.0987
SDD	10490	12	121881823	G	A	KDM2B	NP_115979.3	ENSP00000366271	R815C	FALSE	0.057	-3.363	-3.313	-3.413	4.71924	-2.70757	0.001	1.82	0.816	0.106	0.775771	-0.134276	0.80367	24.6	0.2715
SDD	104925	17	18880215	G	A	SLC5A10	NP_689564.3	ENSP00000379008	A299T	FALSE	0.0157091	-3.1235	-3.112	-3.135	4.492	-4.78773	0.003	-2.49	0.355	0.637	0.446939	0.125265	0.98976	28	0.4267
SDD	104940	10	55587307	G	A	PCDH15	NP_149045.3	ENSP00000322604	R1405C	TRUE	0.062	-3.3405	-3.242	-3.439	7.41296	-1.74316	0.001	0.17	0.895	0.502	0.807516	0.187569	0.969373	31	0.9231
SDD	104940	17	42934494	G	A	EFTUD2	NP_004238.3	ENSP00000392094	T665M	TRUE	0.02	-4.4885	-4.159	-4.818	11.8336	-10.4559	0	0.75	0.881	0.594	0.924023	0.155026	0.999113	31	0.8902
SDD	104951	18	77895430	A	G	ADNP2	NP_055728.1	ENSP00000262198	M712V	FALSE	0.0336391	-3.123	-3.09	-3.156	5.715	-0.255293	0.238		0.239	0.13	0.543344	-0.112939	0.129096	15.43	0.1568
SDD	104970	2	43547647	T	C	THADA	NP_071348.3	ENSP00000386088	Y1459C	FALSE	0.343	-2.694	-2.694			0.692232	0.054	2.66	0.454	0.206	0.495223	-0.0189348	0.856483	21.1	0.098
SDD	10497	12	43858451	A	T	ADAMTS20	NP_079279.3	ENSP00000374071	D484E	FALSE	0.10925	-3.511	-3.602	-3.42	6.496	-3.6491	0.012	3.1	0.51	0.082	0.345853	-0.146686	0.918993	22.3
SDD	10497	1	1115515	C	G	TTLL10	NP_001123517.1	ENSP00000368591	L101V	FALSE	0.464	-2.8795	-2.836	-2.923	3.18201	-0.818734	0.046	3.33	0.079	0.018	0.267199	-0.469291	0.0817751	0.455	0.0756
SDD	104983	1	160141096	G	T	ATP1A4	NP_653300.2	ENSP00000357060	G516V	FALSE	0.0163522	-4.1085	-4.278	-3.939	11.235	-13.4132	0	-4.81	0.984	0.943	0.569001	0.573607	0.999845	28.4	0.9951
SDD	104983	6	394923	T	C	IRF4	NP_002451.2	ENSP00000370343	F107L	FALSE	0.0314089	-4.6975	-4.884	-4.511	12.42	-7.63334	0	-4.6	0.785	0.933	0.918404	0.534815	0.998512	30	1
SDD	104984	11	60531250	C	T	MS4A15	NP_001092305.1	ENSP00000386022	P15L	FALSE	0.734357	-3.2505	-3.222	-3.279	6.767	-2.57785	0.078	2.52	0.372	0.116	0.65637	-0.174503	0.138518	14.38	0.1776
SDD	104984	4	175160262	G	A	FBXO8	NP_036312.2	ENSP00000377280	R219C	FALSE	0.0216859	-3.54	-3.946	-3.134	1.733	-3.6456	0.017	0.52	0.572	0.155	0.886811	0.105389	0.460483	24	0.2522
SDD	104995	12	123519079	G	A	PITPNM2	NP_001287730.1	ENSP00000280562	A20V	FALSE	0.131	-3.9055	-3.982	-3.829	8.36377	-6.48471	0	0.54	0.848	0.408	0.778792	0.126558	0.98443	29.4	0.9865
SDD	105004	12	58110204	C	T	OS9	NP_006803.1	ENSP00000318165	P301L	TRUE	0.049	-3.146	-3.145	-3.147	0.544311	-1.2168	0.059	1.17	0.089	0.025	0.319784	-0.471232	0.0201828	1	0.0643
SDD	105004	15	75654051	G	A	MAN2C1	NP_001243423.1	ENSP00000457788	P371L	TRUE	0.015	-3.866	-4.068	-3.664	9.40454	-9.66216	0	-1.64	0.939		0.576371	0.33691	0.999502	31	0.8086
SDD	105004	2	120003194	G	A	STEAP3	NP_001008410.1	ENSP00000376818	R41H	TRUE	0.177	-3.2205	-2.904	-3.537	8.2204	-5.73057	0.015	0.92	0.597	0.311	0.515383	-0.120893	0.832384	26.7	0.1627
SDD	105012	8	2050563	C	T	MYOM2	NP_003961.3	ENSP00000262113	A909V	FALSE	0.0496795	-2.6055	-2.675	-2.536	4.24	-0.47961	0.02	0.46	0.49	0.23	0.44983	-0.134362	0.875279	22.7	0.2598
SDD	105029	3	14799105	G	A	C3orf20	NP_001171886.1	ENSP00000396081	S601N	FALSE	0.10177	-3.355	-3.571	-3.139	2.912	-0.877836	0.471	3.07	0.112	0.06		-0.429684	0.188288	0.434	0.1031
SDD	105031	17	80211100	A	C	CSNK1D	NP_001884.2	ENSP00000324464	I119M	FALSE	0.009	-3.168	-3.067	-3.269	3.32654	-3.11461	0.198	2.04	0.854	0.268	0.918533	-0.0468032	0.826121	19.5	0.4882
SDD	105034	12	2909565	A	C	FKBP4	NP_002005.1	ENSP00000001008	K285T	FALSE	0.036	-4.115	-4.361	-3.869	9.2323	-9.97718	0.002	-0.97	0.545	0.587	0.704892	0.0933553	0.97531	25.4	0.6517
SDD	105040	7	105738270	T	A	SYPL1	NP_006745.1	ENSP00000011473	I108L	FALSE	0.003	-3.3305	-3.415	-3.246	2.62961	-1.94398	0.137	1.9	0.34	0.08	0.384231	-0.182796	0.328372	10.19	0.1178
SDD	105040	8	81899653	C	A	PAG1	NP_060910.3	ENSP00000220597	D76Y	FALSE	0.132883	-3.81	-4.028	-3.592	4.748	-4.3823	0.001		0.464	0.282	0.429255	0.099694	0.984637	24.3	0.3384
SDD	10504	15	37188873	C	T	MEIS2	NP_733774.1	ENSP00000453497	R331K	TRUE	0.234	-4.768	-4.921	-4.615	10.2463	-12.669	0.001	-7.08	0.902		0.937918	0.573373	0.995883	31	0.9989
SDD	105074	6	46977303	C	T	ADGRF1	NP_722582.2	ENSP00000360299	R623H	FALSE	0.001	-3.113	-3.243	-2.983	5.79651	-3.52053	0.001	0.41	0.312	0.265	0.336272	-0.36063	0.184755	17.95	0.0843
SDD	105081	15	90984884	A	G	IQGAP1	NP_003861.1	ENSP00000268182	K266E	FALSE	0.390044	-3.6855	-3.491	-3.88	9.551	-0.827002	0.001	0.58	0.769	0.601	0.704913	0.339378	0.995962	27.8	0.9511
SDD	105084	16	30365340	C	T	CD2BP2	NP_001230575.1	ENSP00000456935	R86Q	FALSE	0.044	-2.845	-2.944	-2.746	0.51123	-1.34743	0.128	1.59	0.297		0.552238	-0.229864	0.157987	23	0.0909
SDD	105091	17	38122094	C	T	GSDMA	NP_835465.2	ENSP00000301659	R52W	FALSE	0.0990453	-3.995	-4.141	-3.849	10.894	-1.91071	0.007	1.71	0.732	0.377	0.668279	-0.152342	0.499999	28.9	0.1731
SDD	105091	21	34143871	C	T	PAXBP1	NP_057715.2	ENSP00000328992	G37S	FALSE	0.911	-3.2145	-2.956	-3.473	5.41052	-1.07509	0.052	1.99	0.105	0.09	0.871429	-0.128612	0.244599	15.39	0.0903
SDD	105110	12	10015164	T	C	CLEC2B	NP_005118.2	ENSP00000228438	T3A	FALSE	0.998	-3.063	-3.063			-0.583714	0	4.54	0.071	0.01	0.286383	-0.336319	0.0326819	0.054	0.0905
SDD	105113	1	108307742	C	G	VAV3	NP_006104.4	ENSP00000359073	D293H	TRUE	0.03	-3.683	-3.52	-3.846	8.45105	-8.04318	0.018	-0.09	0.776	0.508	0.759397	0.153655	0.985234	25.8	0.9804
SDD	105113	22	19753442	C	T	TBX1	NP_542378.1	ENSP00000331791	P309L	TRUE	0.085	-3.0365	-2.942	-3.131	2.26199	-5.40926	0.004	-2.04	0.623	0.477	0.81847	0.0398811	0.91617	25.5	0.4225
SDD	105128	11	64594554	T	C	CDC42BPG	NP_059995.2	ENSP00000345133	N1453D	FALSE	0.069	-2.631	-2.903	-2.359	-4.22412	1.10801	1	0.33	0.154	0.153	0.346261	-0.293601	0.0459474	12.09	0.0669
SDD	105150	1	6202264	C	T	CHD5	NP_056372.1	ENSP00000262450	R787H	TRUE	0.0442172	-4.669	-4.809	-4.529	11.475	-9.36051	0	-3.52	0.919	0.944	0.80892	0.491897	0.999116	29.3	0.9811
SDD	105204	7	80439953	T	C	SEMA3C	NP_006370.1	ENSP00000265361	N171S	FALSE	0.0550893	-2.645	-2.762	-2.528	0.491	-0.460333	0.466	2.01	0.195	0.018	0.384932	-0.333411	0.0493468	14.45	0.0598
SDD	105210	16	29845273	A	C	MVP	NP_005106.2	ENSP00000349977	K155Q	TRUE	0.122	-3.3225	-3.072	-3.573	6.74109	-3.4045	0.058	1.45	0.553	0.248	0.631611	-0.00135373	0.948397	29.1	0.375
SDD	105210	1	6196634	T	G	CHD5	NP_056372.1	ENSP00000262450	Q880P	TRUE	0.0109791	-4.7225	-5.273	-4.172	9.567	-11.9943	0	-3.37	0.948	0.969	0.868344	0.524097	0.99786	27.1	0.9441
SDD	105210	3	164908111	G	A	SLITRK3	NP_001305739.1	ENSP00000420091	R170W	TRUE	0.034	-3.7155	-3.668	-3.763	6.90064	-5.59644	0.008	0.62	0.762	0.348	0.894997	-0.108111	0.929459	24	0.5129
SDD	105213	5	179046385	T	C	HNRNPH1	NP_001244222.1	ENSP00000377082	I141V	TRUE	0.038	-3.698	-3.583	-3.813	5.59756	-3.88432	0.049	3.62	0.468	0.183	0.877464	-0.0619755	0.824763	23.6	0.8943
SDD	105216	15	86940614	G	T	AGBL1	NP_689549.3	ENSP00000413001	V798L	FALSE	-1	-3.127	-3.127			-2.10318				0.121	0.495163	-0.271862	0.328876	22.3
SDD	105219	22	39120346	C	T	GTPBP1	NP_004277.2	ENSP00000216044	R335W	TRUE	0.172	-4.1255	-4.003	-4.248	7.4823	-10.1422	0	1.29	0.712	0.501	0.913246	0.271039	0.999426	28.2	0.9777
SDD	105219	3	176768267	C	T	TBL1XR1	NP_078941.2	ENSP00000413251	G187R	TRUE	0.042	-6.4375	-6.93	-5.945	10.0967	-15.3163	0.001	-0.62	0.965	0.895	0.925759	0.411038	0.999401	32	0.9999
SDD	105237	9	139571522	G	A	AGPAT2	NP_006403.2	ENSP00000360761	P128L	FALSE	0.006	-3.095	-3.378	-2.812	3.84662	-6.88512	0.003	-2.82	0.505	0.372	0.551922	0.0913002	0.886754	20.4	0.5237
SDD	105238	16	30536628	T	C	ZNF768	NP_078947.3	ENSP00000369777	Q278R	FALSE	0.018	-2.901	-2.866	-2.936	1.30994	-0.0167032	0.348	3.17	0.187	0.187	0.741478	-0.187281	0.270887	18.5	0.9416
SDD	105255	12	129180460	G	A	TMEM132C	NP_001129575.2	ENSP00000410852	V581I	FALSE	0.001	-3.2545	-3.104	-3.405	7.995	-1.58189	0	2.04	0.603	0.213	0.746324	-0.127694	0.965528	26.4	0.1047
SDD	105276	17	26950975	G	A	BLTP2	NP_055495.2	ENSP00000436773	R1588C	FALSE	0.0393082	-3.583	-3.611	-3.555	6.918	-0.865832	0	1.53	0.77	0.554	0.868841	0.263978	0.997816	32	0.2486
SDD	105282	20	40735512	C	T	PTPRT	NP_573400.3	ENSP00000362294	D1121N	FALSE	0.112	-3.606	-3.606			-5.61656			0.9	0.572	0.853227	0.0276369	0.99563	28.8	0.6079
SDD	105285	17	57287576	A	G	SMG8	NP_060619.4	ENSP00000300917	K55R	TRUE	0.957	-3.773	-3.327	-4.219	12.3418	0.0384136	0	0.51	0.686	0.297	0.758424	0.144195	0.980806	24.5	0.3247
SDD	105303	13	110436111	C	T	IRS2	NP_003740.2	ENSP00000365016	G764R	FALSE	0.004	-2.926	-2.639	-3.213	5.43677	-1.24752	0.003	2.17	0.448	0.234	0.790361	0.0386802	0.993726	24.6	0.3624
SDD	105317	5	77425098	C	T	AP3B1	NP_003655.3	ENSP00000255194	G562S	FALSE	0.002	-3.4205	-3.498	-3.343	4.95312	-3.20203	0.006	2.69	0.444	0.244	0.906134	-0.121219	0.83028	25.2	0.5704
SDD	105317	7	26765098	G	T	SKAP2	NP_003921.2	ENSP00000005587	P249T	FALSE	0.309	-3.1945	-3.147	-3.242	3.49249	-0.15855	0.248	2	0.032	0.027	0.236501	-0.355278	0.0486063	1.008	0.0578
SDD	105320	10	32322840	A	G	KIF5B	NP_004512.1	ENSP00000307078	F413S	FALSE	0.013	-2.864	-2.884	-2.844	-0.103638	-1.00979	0.092	-1.06	0.345	0.333	0.604505	0.0543371	0.915797	23.2	0.1967
SDD	105320	15	74622545	C	T	CCDC33	NP_079331.3	ENSP00000381795	R436W	FALSE	0.091	-3.723	-3.772	-3.674	8.53101	-5.09612	0.001	1.85	0.553	0.222	0.288784	-0.202599	0.925453	28.2
SDD	105320	X	70389606	C	T	NLGN3	NP_061850.2	ENSP00000363163	R716W	FALSE	0.907	-4.634	-4.517	-4.751	7.59778	-8.74649	0	-0.37	0.499	0.345	0.832022	-0.114464	0.853972	23.9	0.3008
SDD	105325	14	105834449	G	A	PACS2	NP_001094383.2	ENSP00000393559	E209K	TRUE	0.121	-4.1025	-4.251	-3.954	7.22717	-11.434	0.061	2.32	0.688	0.228	0.893252	0.0511305	0.962475	28.9	0.9084
SDD	105348	11	66618641	C	A	PC	NP_000911.2	ENSP00000377530	G698V	TRUE	0.01	-3.4435	-3.211	-3.676	7.9964	-3.91392	0.002	-4.65	0.503	0.694	0.551102	0.278941	0.99745	23.3	0.7089
SDD	105352	16	5064915	G	A	SEC14L5	NP_055507.1	ENSP00000251170	A679T	TRUE	0.722187	-2.409	-2.429	-2.389	1.707	-1.28059	0.354	-0.52	0.047	0.083	0.287874	-0.397987	0.0365208	4.365	0.0631
SDD	105352	1	227172602	C	T	COQ8A	NP_064632.2	ENSP00000355739	T511M	TRUE	0.012	-3.0195	-2.903	-3.136	6.64035	-7.6684	0.002	0.71	0.631	0.233	0.628095	-0.107415	0.802462	25.3	0.5722
SDD	105355	19	49167429	T	C	NTN5	NP_665806.1	ENSP00000270235	Q314R	TRUE	0.062	-3.253	-3.266	-3.24	6.30029	-6.29828	0.004	0.14	0.696	0.43	0.571776	0.0212899	0.988574	26.2	0.3575
SDD	105355	2	178095827	G	A	NFE2L2	NP_006155.2	ENSP00000380252	R502C	TRUE	0.053	-5.016	-4.969	-5.063	11.9553	-11.3412	0	-5.45	0.86	0.974	0.930149	0.555371	0.998158	29.8	0.951
SDD	105358	4	111539673	A	T	PITX2	NP_000316.2	ENSP00000495061	S195T	TRUE	-1	-3.074	-3.074			-1.6028					0.818939	0.116986	0.855322	22.5	0.1249
SDD	105364	20	2375962	G	A	TGM6	NP_945345.2	ENSP00000202625	A102T	FALSE	0.099	-2.563	-2.704	-2.422	-2.04541	1.03112	0.578	-1.8	0.072	0.236	0.221187	-0.497441	0.0184635	0.018	0.0687
SDD	105367	10	31139161	C	T	ZNF438	NP_001137238.1	ENSP00000406934	R58H	TRUE	0.107093	-2.708	-3.157	-2.259	1.124	0.0506987	0.548	0.31	0.044	0.103	0.212079	-0.415613	0.0451463	12.63	0.0751
SDD	105367	19	50906346	A	T	POLD1	NP_002682.2	ENSP00000406046	Q336L	TRUE	0.059	-3.559	-3.394	-3.724	9.28058	-4.87595	0	2.7	0.826	0.432	0.715978	0.201807	0.986379	26.8	0.8675
SDD	10539	2	30987153	C	T	CAPN13	NP_653176.2	ENSP00000295055	D182N	FALSE	0.03	-2.722	-3.114	-2.33	-1.17957	-0.678788	1	-2.24	0.116	0.229	0.260391	-0.357042	0.0102152	8.381	0.0973
SDD	105404	16	21721337	C	G	OTOA	NP_733764.1	ENSP00000373609	H87Q	FALSE	0.136	-3.0755	-3.329	-2.822	0.327759	1.58084	0.348	-1.08	0.192	0.143	0.429725	-0.165915	0.156543	0.004
SDD	105404	9	136906980	C	T	BRD3	NP_031397.1	ENSP00000305918	A437T	FALSE	0.086	-2.775	-2.831	-2.719	-0.376587	-1.13615	0.351	1.01	0.11	0.049	0.379926	-0.418869	0.0271209	2.106	0.0592
SDD	105418	8	86037142	G	A	LRRCC1	NP_208325.3	ENSP00000353538	D414N	FALSE	0.058	-3.1005	-3.198	-3.003	0.803711	-0.0213945	0.381	1.5	0.055	0.073	0.355567	-0.345072	0.0375509	16.21	0.0688
SDD	105421	10	12046700	T	G	UPF2	NP_542166.1	ENSP00000380244	T445P	FALSE	0.0564738	-3.6295	-3.458	-3.801	8.475	0.164495	0.131	0.82	0.517	0.198	0.801172	0.075942	0.903218	22.9	0.6826
SDD	10542	18	33704519	C	G	SLC39A6	NP_036451.4	ENSP00000269187	A312P	FALSE	0.0627629	-3.1145	-2.955	-3.274	3.866	0.415208	0.189	-0.05	0.314	0.041	0.518197	-0.0196679	0.264574	20.8	0.1044
SDD	105437	4	8235144	C	A	SH3TC1	NP_061859.4	ENSP00000245105	D1062E	FALSE	0.0620476	-3.1175	-2.82	-3.415	8.82	0.295205	0.023	-0.74	0.565	0.416	0.805019	0.0486654	0.989576	23.6	0.9167
SDD	105482	22	25275493	T	G	SGSM1	NP_001035037.1	ENSP00000383212	W554G	FALSE	0	-3.408	-3.417	-3.399	5.98022	-1.67216	0.003	0.79	0.915	0.762	0.783977	0.286339	0.999004	25.7	0.9873
SDD	105482	7	148768662	T	C	ZNF786	NP_689624.2	ENSP00000417470	H401R	FALSE	0.189585	-2.5725	-2.819	-2.326	0.982	0.153781	0.012	3.2	0.155	0.033	0.348452	-0.400529	0.0573764	11.15	0.0931
SDD	105488	2	241402892	C	A	GPC1	NP_002072.2	ENSP00000264039	N282K	FALSE	0	-3.483	-3.544	-3.422	8.47754	-7.12562	0.002	0.66	0.732	0.377	0.845239	-0.0276404	0.992533	25	0.8944
SDD	10548	1	16534048	G	C	ARHGEF19	NP_694945.2	ENSP00000270747	N281K	FALSE	0.125	-2.8755	-2.865	-2.886	0.199829	2.73313	0.166	-0.38	0.091	0.035	0.355513	-0.255572	0.114188	9.208	0.0813
SDD	105497	2	209302497	G	A	PTH2R	NP_005039.1	ENSP00000272847	R101Q	FALSE	0.057	-3.355	-3.223	-3.487	7.68509	-6.81415	0	-0.4	0.906	0.726	0.40391	0.0424093	0.886674	31	0.6135
SDD	105502	11	69486574	T	G	LTO1	NP_703152.1	ENSP00000279147	Q57P	TRUE	0.001	-3.7725	-4.096	-3.449	8.22856	-5.46645	0.237	0.81	0.726	0.247	0.259164	0.0132958	0.441427	17.46	0.6916
SDD	105502	12	8902482	T	A	RIMKLB	NP_001284705.1	ENSP00000445863	I67N	TRUE	0.155	-3.721	-4.172	-3.27	2.25061	-4.82591	0.004		0.785	0.605	0.634658	0.0461223	0.979428	23.2	0.5813
SDD	105502	17	7807178	T	C	CHD3	NP_001005271.2	ENSP00000369716	Y1314H	TRUE	0.018	-4.1145	-3.705	-4.524	7.93799	-2.22531	0.003	-3.96	0.88	0.883	0.866746	0.538165	0.990247	28.9	0.9941
SDD	105505	9	36369838	C	T	RNF38	NP_073618.3	ENSP00000259605	A150T	FALSE	0.163	-3.0955	-2.885	-3.306	2.60754	0.0433867	0.179	1.52	0.266	0.064	0.527026	-0.260648	0.0610795	21.8	0.0682
SDD	105508	15	42710053	G	A	ZNF106	NP_071918.1	ENSP00000263805	R1849C	FALSE	0.0927734	-3.628	-3.515	-3.741	7.631	-1.25926	0.032	0.19	0.606	0.341	0.871839	0.172889	0.787693	33	0.8683
SDD	105508	16	55601102	A	G	CAPNS2	NP_115706.1	ENSP00000400882	K145R	FALSE	0.0203065	-3.2525	-3.231	-3.274	3.888	-2.49486	0.221	-1.24	0.401	0.348	0.600228	0.000807877	0.911877	22.9	0.0948
SDD	105524	9	711970	G	C	KANK1	NP_001243805.1	ENSP00000371740	A402P	TRUE	0.03	-2.9745	-2.819	-3.13	8.57141	-1.04556	0.021	5.52	0.614	0.328	0.591489	0.189705	0.955059	27.8	0.5728
SDD	105526	16	2029325	G	T	NOXO1	NP_653204.1	ENSP00000346195	P281T	FALSE	0.0336538	-3.8025	-3.935	-3.67	11.587	-9.92103	0	-2.68	0.627	0.675	0.815712	0.304491	0.975916	23.1	0.8259
SDD	10552	5	145843182	A	G	TCERG1	NP_006697.2	ENSP00000296702	T321A	FALSE	0.24	-3.025	-2.799	-3.251	3.99866	-0.923124	0.714	-1.69	0.3	0.107	0.48688	-0.100396	0.27037	15.77	0.0666
SDD	105530	10	115392937	C	T	NRAP	NP_001248392.1	ENSP00000358365	R513H	FALSE	0.481	-3.3065	-3.162	-3.451	7.35083	-2.716	0.004	0.53	0.522	0.257	0.534042	-0.175588	0.413811	27.1	0.2096
SDD	105530	17	45673795	G	C	NPEPPS	NP_006301.3	ENSP00000320324	M501I	FALSE	0.002	-3.685	-3.685		6.09253	-2.89525	0.043	3.6	0.692	0.433	0.724791	-0.130304	0.0973848	24.2	0.8955
SDD	105530	2	167141136	T	G	SCN9A	NP_001352465.1	ENSP00000495601	N601H	FALSE	0.407475	-2.9085	-3.045	-2.772	2.636	-0.363088					0.499178	0.0594867	0.928152	23.5	0.1272
SDD	105530	6	17507505	G	A	CAP2	NP_006357.1	ENSP00000229922	V136I	FALSE	0.055	-2.952	-2.915	-2.989	1.66876	-1.52414	0.526	2.68	0.138	0.122	0.625309	-0.425752	0.224754	21	0.0754
SDD	105534	10	3181209	A	G	PITRM1	NP_001229236.1	ENSP00000370377	F936S	FALSE	0.0886165	-3.956	-3.818	-4.094	11.711	-9.30668	0	2.99	0.893	0.615	0.611868	-0.00977324	0.979784	26	0.8394
SDD	105534	1	29611298	G	A	PTPRU	NP_005695.3	ENSP00000334941	M745I	FALSE	0.005	-3.136	-2.969	-3.303	2.68457	-0.596543	0.162	1.55	0.76	0.15	0.679111	-0.0454394	0.859195	24.2	0.6613
SDD	105538	1	249211324	T	C	PGBD2	NP_733843.1	ENSP00000331643	C181R	FALSE	0.125	-3.206	-3.046	-3.366	4.81482	-1.14578	0.171	2.36	0.636	0.293	0.706016	0.123664	0.980385	24.8	0.6431
SDD	10553	17	42333103	C	G	SLC4A1	NP_000333.1	ENSP00000262418	G580R	TRUE	0.018	-4.3485	-4.782	-3.915	10.1999	-11.5788	0	-1.62	0.945	0.928	0.701268	0.428966	0.999764	26.1	0.9756
SDD	105553	17	34190048	G	A	HEATR9	NP_689994.2	ENSP00000473941	T236M	FALSE	0.017	-2.8245	-3.266	-2.383	0.118469	-0.348996		0.92	0.157			-0.480601	0.0329832	0.472	0.0759
SDD	105553	19	57764711	G	A	ZNF805	NP_001018857.2	ENSP00000412999	R175Q	FALSE	0.34	-2.9065	-3.081	-2.732	0.551636	-0.142354	1	2.19	0.042	0.024	0.21014	-0.41223	0.0214943	0.949	0.0674
SDD	105556	2	85777118	G	A	GGCX	NP_000812.2	ENSP00000233838	T739M	FALSE	-1	-3.098	-3.098			-1.94119	0.277	1.49	0.048	0.106	0.270763	-0.47652	0.0417184	1.762	0.084
SDD	105556	3	38278446	A	C	OXSR1	NP_005100.1	ENSP00000311713	Q356H	FALSE	0.47	-3.03	-3.047	-3.013	1.6413	-2.64684	0.125	-0.67	0.233	0.142	0.647777	-0.040537	0.372316	19.37	0.2293
SDD	105559	5	127512805	G	A	SLC12A2	NP_001037.1	ENSP00000262461	E980K	FALSE	0.522851	-2.684	-2.782	-2.586	1.458	-0.0283239	0.394	-1.91	0.272	0.379	0.593212	0.0994742	0.7664	24.1	0.1996
SDD	105559	6	47779420	G	A	OPN5	NP_859528.1	ENSP00000360255	V337I	FALSE	0.616	-3.0735	-3.126	-3.021	0.925354	-0.828158	0.637	-0.2	0.115	0.092	0.306575	-0.358802	0.0296547	8.416	0.0884
SDD	105562	12	44136358	T	C	PUS7L	NP_112582.3	ENSP00000343081	K422E	FALSE	0.0273711	-2.799	-2.985	-2.613	-0.439	0.683578	0.897	1.06	0.087	0.047	0.292936	-0.215817	0.0345663	10.14	0.0578
SDD	105565	3	114014419	C	T	TIGIT	NP_776160.2	ENSP00000373167	T30M	FALSE	0.16141	-2.944	-3.317	-2.571	1.439	-1.49762	0.47	-0.19	0.085	0.053	0.212892	-0.368565	0.0178629	0.002	0.0705
SDD	105575	1	101198105	G	A	VCAM1	NP_001069.1	ENSP00000294728	G553R	FALSE	0.042	-3.62	-3.366	-3.874	5.95654	-3.12336	0.006	0.65	0.321	0.328	0.33764	-0.170776	0.280744	22.8	0.1271
SDD	105585	1	150527970	A	G	ADAMTSL4	NP_061905.2	ENSP00000271643	T434A	FALSE	0.246	-2.903	-2.773	-3.033	3.87994	2.59432	0.55	0.31	0.313	0.213	0.586857	-0.0822111	0.690993	21.2	0.1468
SDD	105606	12	68052128	C	T	DYRK2	NP_006473.2	ENSP00000342105	R481C	TRUE	0.137	-3.4025	-2.997	-3.808	7.67883	-3.88624	0.001	1.97	0.528	0.291	0.793247	0.131359	0.972624	26	0.6663
SDD	105606	20	472990	C	T	CSNK2A1	NP_001349700.1	ENSP00000495248	G177S	TRUE	0.00975301	-4.9565	-5.249	-4.664	7.111	-12.7789					0.865875	0.4121	0.998937	25.3	0.9997
SDD	105609	1	4772523	C	T	AJAP1	NP_001035943.1	ENSP00000367432	P198L	FALSE	0.089	-3.2405	-3.016	-3.465	6.12714	-0.486216	0	0.73	0.619	0.232	0.584697	0.0741626	0.893497	23.2	0.1422
SDD	105609	3	196454812	A	G	PIGX	NP_001159776.1	ENSP00000296333	N113D	FALSE	0.0100287	-3.116	-3.298	-2.934	2.604	0.344291	0.602	1.55		0.027	0.456443	-0.296543	0.0195355	16.25	0.0864
SDD	105619	17	27068432	G	C	NEK8	NP_835464.1	ENSP00000268766	E631D	TRUE	0.649922	-2.6445	-2.867	-2.422	0.208	-0.144557	0.542	-1.05	0.293	0.157	0.539243	-0.283312	0.0293511	0.007	0.0629
SDD	105629	14	36334194	A	G	BRMS1L	NP_115728.2	ENSP00000216807	T226A	TRUE	0.085	-3.207	-3.045	-3.369	-2.34427	-0.0416289	1		0.21	0.098	0.620709	-0.116214	0.234753	20.5	0.0565
SDD	105629	19	19023812	T	C	COPE	NP_009194.2	ENSP00000262812	Y57C	TRUE	0.09	-3.4735	-3.402	-3.545	7.59106	-6.76567	0.001	0.68	0.74	0.346	0.69625	-0.0422561	0.978104	25.5	0.2957
SDD	105629	1	220162123	C	G	EPRS1	NP_004437.2	ENSP00000355890	A862P	TRUE	0.046	-3.7065	-3.757	-3.656	6.61694	-6.15004	0.01	1.33	0.754	0.341	0.559531	-0.201953	0.150794	26.8	0.9128
SDD	105629	21	44317139	A	G	NDUFV3	NP_066553.3	ENSP00000346196	K51E	TRUE	0.093	-3.466	-3.258	-3.674	5.31299	-0.568232	0.125		0.143	0.187	0.354945	-0.120009	0.596546	18.57	0.1201
SDD	105629	4	140444533	G	A	SETD7	NP_085151.1	ENSP00000274031	L207F	TRUE	0.033	-3.426	-3.153	-3.699	6.51337	-2.75209	0.079	-2.18	0.37	0.291	0.543014	0.0314407	0.704508	23.3	0.1257
SDD	105635	8	90965723	C	T	NBN	NP_002476.2	ENSP00000265433	V532M	TRUE	0.140741	-2.873	-3.201	-2.545	3.302	-1.12056	0.155	1.98	0.061	0.024	0.316224	-0.421002	0.0297625	7.666	0.0923
SDD	105638	9	8485917	G	A	PTPRD	NP_002830.1	ENSP00000370593	P967L	FALSE	0.364	-2.8595	-2.896	-2.823	2.3728	-1.40274	0.029	0.36	0.779	0.271	0.641803	0.14994	0.837498	24	0.2172
SDD	105647	19	35842726	A	G	FFAR1	NP_005294.1	ENSP00000246553	Y91C	FALSE	0.013468	-3.423	-3.28	-3.566	6.478	-3.92698	0.042	-0.71	0.82	0.6	0.864549	0.306809	0.998153	25	0.642
SDD	105652	1	23385583	G	T	KDM1A	NP_001009999.1	ENSP00000383042	V364L	TRUE	0.017	-3.9615	-3.884	-4.039	4.49439	-3.93139	0.016	-3	0.713	0.697	0.769395	0.278514	0.903105	25	0.9096
SDD	105652	3	111766762	T	A	TMPRSS7	NP_001036040.2	ENSP00000411645	S177T	TRUE	0.546	-3.4295	-3.269	-3.59	8.90967	-1.94274	0.406	2.04	0.469	0.112	0.4157	-0.150535	0.929415	23.4
SDD	105655	1	173915939	C	G	RC3H1	NP_001287779.1	ENSP00000258349	A925P	FALSE	0.264	-3.2045	-3.222	-3.187	2.63501	0.445068	0.102	0.91	0.235	0.041	0.277592	-0.151852	0.27578	17.78	0.0909
SDD	105658	20	45910868	G	C	ZMYND8	NP_001350643.1	ENSP00000439800	R333G	FALSE	0.0326877	-5.8215	-6.218	-5.425	15.83	-12.0028	0	-0.56	0.763	0.735	0.896455	0.394212	0.997166	29.6	0.9994
SDD	105658	7	18629998	C	G	HDAC9	NP_478056.1	ENSP00000410337	L99V	FALSE	0.228	-3.433		-3.433	6.44043		0.023	0.18	0.521	0.168	0.813171	0.0431246	0.83367	23.5	0.0875
SDD	105661	11	61544318	C	A	MYRF	NP_001120864.1	ENSP00000278836	A520D	TRUE	0.006	-4.2265	-4.25	-4.203	8.47583	-8.01697	0.005	1.25	0.87	0.486	0.854142	0.242667	0.993195	26.6	0.9944
SDD	105672	21	30400263	C	G	USP16	NP_001027582.1	ENSP00000334808	T10S	FALSE	0.247	-3.013	-3.135	-2.891	1.6123	-0.099662	0.349	3.47	0.108	0.072	0.479076	-0.255395	0.168326	13	0.0828
SDD	105672	8	81399305	C	T	ZBTB10	NP_001099009.1	ENSP00000412036	A87V	FALSE	0.87	-3.064	-3.134	-2.994	1.91565	-1.69975	0.003	2.61	0.151	0.071	0.86803	-0.349309	0.240198	19.14	0.1032
SDD	105676	8	18393461	C	T	PSD3	NP_056125.3	ENSP00000324127	R979H	FALSE	0.065	-3.6965	-3.474	-3.919	18.4125	-8.78758	0	2.08	0.706	0.398	0.596501	0.178849	0.98452	28.3
SDD	10567	13	50296173	G	T	KPNA3	NP_002258.2	ENSP00000261667	T215N	FALSE	0.017	-3.6785	-3.889	-3.468	2.56354	-5.53393	0.147	-0.33	0.646	0.168	0.889572	0.0335905	0.699639	22.5	0.2441
SDD	10567	22	29444420	G	A	ZNRF3	NP_001193927.1	ENSP00000443824	C319Y	FALSE	0.01	-4.2795	-4.88	-3.679	7.01404	-12.6448	0.001	-1.81	0.951	0.912	0.911584	0.458998	0.999918	28.3	0.999
SDD	105705	17	41958079	C	T	MPP2	NP_001265299.1	ENSP00000428182	R422H	FALSE	0.043042	-2.977	-2.908	-3.046	3.719	-4.22493	0.002	0.85	0.594	0.16	0.658799	0.0818184	0.854774	24.7	0.0872
SDD	105725	14	101349373	C	T	RTL1	NP_001128360.1	ENSP00000497482	D585N	FALSE	0.014	-3.564	-3.382	-3.746	7.72339	-1.65597					0.806742	-0.207408	0.910619	24.4	0.7433
SDD	105726	17	56393825	C	T	TSPOAP1	NP_004749.2	ENSP00000345824	R650Q	FALSE	0.014	-2.988	-3.137	-2.839	0.630615	-0.483772	0.359	1.58	0.037	0.079	0.276084	-0.386477	0.115357	12.36	0.072
SDD	105736	1	151503052	C	T	CGN	NP_065821.1	ENSP00000271636	R801C	FALSE	0.028	-3.718	-3.95	-3.486	6.83862	-5.49413	0.001	-0.37	0.565	0.315	0.651431	-0.153636	0.783554	20.2
SDD	105737	2	162274728	G	A	TBR1	NP_006584.1	ENSP00000374205	M288I	TRUE	0.007	-3.448	-3.387	-3.509	2.99484	-0.24231	0.341	-2.1	0.364	0.45	0.846908	-0.000432943	0.449946	22.5	0.5619
SDD	105740	9	12694133	C	A	TYRP1	NP_000541.1	ENSP00000373570	S46Y	TRUE	0.868	-2.705	-2.739	-2.671	0.697021	-3.20337	0.403	-5.49	0.419	0.179	0.36462	0.0492272	0.051955	8.722	0.0789
SDD	105756	6	10874679	C	T	GCM2	NP_004743.1	ENSP00000368805	R357H	FALSE	0.226	-2.755	-3.486	-2.024	-3.12689	-0.132548	1	-0.21	0.03	0.066	0.217825	-0.278592	0.0805874	0.001	0.0595
SDD	105763	3	96706376	C	T	EPHA6	NP_001073917.2	ENSP00000374323	T218I	FALSE	0.027	-3.604	-3.604		11.8969	-6.72495	0	2.32	0.971	0.605	0.809512	0.25658	0.997377	25.1
SDD	105763	7	944776	C	T	ADAP1	NP_001271240.2	ENSP00000478011	R46Q	FALSE	0.07	-3.2135	-2.977	-3.45	6.76459	-7.81245			0.761		0.77807	-0.0571645	0.881657	26.7	0.9798
SDD	105767	8	22412464	C	T	SORBS3	NP_005766.3	ENSP00000240123	T64I	FALSE	0.511	-2.855	-2.902	-2.808	1.90466	-1.09493	0.017	3.34	0.237	0.023	0.330383	-0.346936	0.0435586	4.507	0.0694
SDD	105771	8	42587280	T	A	CHRNB3	NP_000740.1	ENSP00000289957	V277D	FALSE	0.021	-4.12	-4.203	-4.037	10.6329	-10.313	0	-2.47	0.952	0.922	0.858486	0.466044	0.997806	27.2	0.9968
SDD	105777	3	124385958	A	G	KALRN	NP_008995.2	ENSP00000291478	N513D	FALSE	0.025	-3.626	-3.612	-3.64	6.64355	-3.5865	0.186	2.8	0.529	0.246	0.648409	-0.108279	0.94193	23.4	0.2872
SDD	105783	X	62926208	C	T	ARHGEF9	NP_056000.1	ENSP00000253401	R104Q	FALSE	0.112	-5.0045	-5.034	-4.975	7.74719	-8.5091	0.001	-0.85	0.944	0.799	0.833321	0.500618	0.999811	26	0.9958
SDD	105788	14	105609430	G	A	JAG2	NP_002217.3	ENSP00000328169	R1107C	TRUE	0.195	-3.44	-3.189	-3.691	6.31982	-2.39794	0	-2.32	0.683	0.662	0.891714	0.266401	0.995977	32	0.3134
SDD	105788	4	103189146	C	T	SLC39A8	NP_071437.3	ENSP00000378310	D311N	TRUE	0.006	-4.292	-4.281	-4.303	9.95026	-9.39657	0.007	0.65	0.927	0.478	0.753558	-0.0751904	0.998429	25.7	0.9495
SDD	105792	8	96057804	A	G	NDUFAF6	NP_689629.2	ENSP00000379430	N170S	FALSE	0	-2.9525	-3.054	-2.851	2.36591	-2.56203	0.424	-0.46	0.275	0.079	0.460163	-0.189658	0.586012	17.74	0.0768
SDD	105799	16	67650711	G	A	CTCF	NP_006556.1	ENSP00000264010	R339Q	TRUE	0.002	-5.451	-5.326	-5.576	9.17029	-13.5156	0.003	1.75	0.762	0.265	0.927572	0.0941232	0.922084	32	0.9972
SDD	105799	1	44437728	C	T	DPH2	NP_001375.2	ENSP00000255108	A385V	TRUE	0.0401929	-3.26	-3.251	-3.269	5.138	-3.28859	0.144		0.212	0.019	0.654836	-0.322556	0.0299666	8.926	0.1017
SDD	105809	13	113487180	G	A	ATP11A	NP_115565.3	ENSP00000364781	E468K	TRUE	0.008	-2.959	-2.959			-0.883252	0.073	0	0.803	0.23	0.612426	0.0426087	0.516702	24.4	0.3327
SDD	105809	21	47409043	G	A	COL6A1	NP_001839.2	ENSP00000355180	G284R	TRUE	0.129	-3.995	-4.312	-3.678	8.13251	-10.7577	0	-6.29	0.991	0.975	0.895014	0.581987	0.998804	31	0.9404
SDD	105813	4	1017719	C	T	FGFRL1	NP_001004356.1	ENSP00000425025	T183M	FALSE	0.003	-2.543	-2.509	-2.577	1.36279	-0.856422	0.268	-0.35	0.244	0.168	0.43425	-0.172719	0.0461164	1.621	0.1195
SDD	10581	X	131518703	C	T	MBNL3	NP_060858.2	ENSP00000359890	A316T	FALSE	0.432	-3.406	-3.37	-3.442	2.4516	-0.182435	0.199	0.84	0.258	0.076	0.26653	-0.311652	0.0430595	13.78	0.0648
SDD	105825	20	62187363	C	G	FNDC11	NP_001306081.1	ENSP00000359115	T116R	FALSE	0.005	-2.8555	-3.077	-2.634	-0.103271	0.0567632	0.273		0.15	0.032		-0.220795	0.138487	15.08	0.1488
SDD	105848	10	101552082	G	C	ABCC2	NP_000383.2	ENSP00000497274	R100P	FALSE	-1	-3.044	-3.044			-0.216277					0.275026	-0.0502618	0.755119	16.55	0.6657
SDD	105851	20	9525092	G	A	PAK5	NP_065074.1	ENSP00000367686	P598L	FALSE	0.007	-3.2385	-3.1	-3.377	7.80908	-5.76697	0.024	-0.14	0.609	0.378	0.880613	-0.0314394	0.992185	27.5	0.4709
SDD	105851	3	33725924	T	C	CLASP2	NP_055912.2	ENSP00000419974	I191V	FALSE	0.24359	-3.098	-3.251	-2.945	0.93	0.229841	0.049	-0.24	0.14	0.194	0.22936	-0.257001	0.0550686	0.063
SDD	105869	16	11097112	A	C	CLEC16A	NP_056041.1	ENSP00000387122	K418T	FALSE	0.319	-2.8915	-3.059	-2.724	1.14246	-0.143891	0.348	0.9	0.394	0.115	0.559129	0.0464544	0.573521	23.7	0.1574
SDD	105869	21	45929197	T	C	TSPEAR	NP_659428.2	ENSP00000321987	S547G	FALSE	0.12	-3.118	-3.104	-3.132	3.78033	-5.59251	0.08	2.41	0.516	0.026	0.307552	-0.183704	0.615309	17.58	0.0975
SDD	105877	3	51718642	T	C	TEX264	NP_001123356.1	ENSP00000408186	Y158H	FALSE	0	-3.5725	-3.477	-3.668	8.0387	-1.57815	0.005	4.3	0.692	0.223	0.633154	-0.0670102	0.987197	27.4	0.8312
SDD	105880	7	4050699	G	A	SDK1	NP_689957.3	ENSP00000385899	A745T	FALSE	0.087	-3.365	-3.365			-4.73794	0.002	-0.27	0.956	0.727	0.765424	0.31757	0.994299	25.4	0.7384
SDD	105892	18	47563342	A	T	MYO5B	NP_001073936.1	ENSP00000285039	N111K	TRUE	0.0528283	-4.3045	-4.353	-4.256	12.38	-11.8062	0	-4.09	0.917	0.85	0.869743	0.233299	0.999052	23.2	0.9972
SDD	105892	9	139726265	G	A	RABL6	NP_078994.3	ENSP00000311134	R184Q	TRUE	0.022	-3.5615	-3.821	-3.302	9.89368	-10.8082	0.004	-0.57	0.874	0.532	0.78497	0.201131	0.966993	32	0.7426
SDD	10590	11	116730281	C	T	SIK3	NP_079440.3	ENSP00000364449	R774H	FALSE	0.135	-2.603	-3.244	-1.962	-4.12354	0.856795	0.696	-0.4	0.116	0.025	0.239638	-0.248263	0.0276625	14.05	0.0631
SDD	10590	9	104499850	C	T	GRIN3A	NP_597702.2	ENSP00000355155	V138M	FALSE	0.755682	-2.803	-3.074	-2.532	0.708	-0.568343	0.267	-2.05	0.079	0.17	0.497034	-0.159868	0.126112	13.17	0.0734
SDD	105917	12	4554514	C	T	FGF6	NP_066276.2	ENSP00000228837	E75K	FALSE	0.232	-2.9355	-2.969	-2.902	3.00824	-2.69002	0.038	-0.88	0.436	0.2	0.597386	0.0133236	0.918021	23.6	0.2072
SDD	105917	17	56247090	G	A	OR4D2	NP_001004707.1	ENSP00000441354	R25H	FALSE	0.142	-2.531	-2.531			-0.824363	0.169	7.43	0.059	0.04	0.202041	-0.602963	0.0563793	0.116	0.0812
SDD	105924	X	9682984	T	C	TBL1X	NP_005638.1	ENSP00000496215	F550L	FALSE	0.144	-4.407	-4.656	-4.158	5.27246	-11.2384					0.885715	0.25698	0.995645	25.4	1
SDD	105928	12	96653628	C	G	ELK3	NP_005221.2	ENSP00000228741	F374L	TRUE	0.237	-3.424	-3.087	-3.761	8.95532	-1.02475	0	0.89	0.871	0.364	0.809124	0.0903221	0.994141	24.2	0.9953
SDD	105928	15	40581492	A	G	PLCB2	NP_004564.2	ENSP00000260402	I1112T	TRUE	0.675	-3.3485	-3.151	-3.546	7.52319	-1.12239	0.001	0.22	0.7	0.602	0.642453	0.231388	0.995664	28.9	0.6812
SDD	105928	9	140056962	G	C	GRIN1	NP_015566.1	ENSP00000360616	G620R	TRUE	0.022	-4.9935	-5.512	-4.475	6.16785	-11.9542	0.005	-1.67	0.828	0.909	0.941693	0.405558	0.996184	31	0.9983
SDD	105938	10	112337628	T	G	SMC3	NP_005436.1	ENSP00000354720	I102M	TRUE	0.07	-4.783	-4.513	-5.053	7.70471	-3.06086	0.001	-2.92	0.562	0.839	0.835656	0.264814	0.973585	24.6	0.9006
SDD	105938	16	705350	C	T	WDR90	NP_660337.3	ENSP00000293879	R534C	TRUE	0.072	-3.2955	-3.077	-3.514	9.42725	-1.55292	0	1.44	0.736	0.263	0.490893	0.00521115	0.878656	24.3	0.1418
SDD	105944	18	44746342	C	T	SKOR2	NP_001264992.1	ENSP00000414750	R986Q	FALSE	0.095	-3.824	-3.824		5.58252	-11.6573	0	0.74	0.64	0.199	0.801475	-0.178151	0.397459	23.4	0.9085
SDD	105948	5	145883430	G	A	TCERG1	NP_006697.2	ENSP00000296702	R864H	FALSE	0.035	-4.0595	-3.974	-4.145	10.031	-8.40164	0.002	1.32	0.591	0.561	0.819787	0.287727	0.993402	32	0.9946
SDD	105951	11	65978677	C	T	PACS1	NP_060496.2	ENSP00000316454	R203W	TRUE	0.105	-5.0575	-5.55	-4.565	9.23834	-11.6244	0	1.16	0.974	0.443	0.915627	0.259086	0.996643	26.9	0.9984
SDD	105951	15	69548183	T	C	GLCE	NP_001311022.1	ENSP00000261858	L13S	TRUE	0.847	-3.8355	-3.781	-3.89	7.44482	-3.011	0.001	0.86	0.852	0.498	0.798161	0.272061	0.946549	27	0.8128
SDD	105957	1	205036237	A	G	CNTN2	NP_005067.1	ENSP00000330633	N662D	FALSE	0.433	-3.038	-2.881	-3.195	3.16101	0.698113	0.018	0.34	0.512	0.133	0.688538	-0.112478	0.883401	22.1	0.2095
SDD	105957	1	210415336	G	A	SERTAD4	NP_062551.1	ENSP00000355979	R242H	FALSE	0.043	-2.349	-3.41	-1.288	-4.07477	-0.272727	1		0.035	0.118	0.42751	-0.329165	0.113965	13.87	0.052
SDD	105957	4	5894576	C	G	CRMP1	NP_001014809.1	ENSP00000321606	G41R	FALSE	0.982	-3.576	-2.721	-4.431	11.0963	-3.75134	0.001	-2.51	0.542	0.544	0.95378	0.0282147	0.909421	27.3
SDD	105957	9	117185694	G	C	WHRN	NP_056219.3	ENSP00000354623	P509R	FALSE	0.168413	-2.6995	-2.759	-2.64	1.404	-1.88038	0.002	3.29	0.276	0.129	0.309283	-0.208309	0.692281	20.9	0.0858
SDD	105975	14	93172979	T	G	LGMN	NP_001008530.1	ENSP00000376911	K347T	FALSE	0.163	-2.949	-2.837	-3.061	1.65765	-0.874214	0.217	0.88	0.22	0.046	0.424268	-0.19893	0.667779	20.8	0.0864
SDD	105975	3	172643243	C	A	SPATA16	NP_114161.3	ENSP00000341765	W374L	FALSE	0.198	-3.393	-2.932	-3.854	5.91064	2.55944	0	1.74	0.623	0.204	0.616751	0.0739614	0.997159	26.2	0.4732
SDD	105986	17	48277307	G	C	COL1A1	NP_000079.2	ENSP00000225964	I35M	TRUE	-1	-3.148	-3.148			-1.26664	0.113	-2.57	0.373	0.309	0.560403	-0.000771733	0.305327	23.9	0.0972
SDD	105986	2	5833090	C	G	SOX11	NP_003099.1	ENSP00000322568	I79M	TRUE	0	-5.2835	-5.407	-5.16	11.2565	-12.244	0	-5.43	0.707	0.878	0.915494	0.427204	0.987671	24.6	0.9992
SDD	105986	3	133670068	A	T	SLCO2A1	NP_005621.2	ENSP00000311291	M282K	TRUE	0.01	-3.547	-3.486	-3.608	6.04065	-6.69835	0	1.05	0.685	0.455	0.51139	0.152578	0.986565	25.3	0.4707
SDD	106004	2	220285626	G	A	DES	NP_001918.3	ENSP00000363071	R325Q	FALSE	0.018	-3.3195	-3.271	-3.368	6.13788	-7.506	0.001	-2.9	0.837	0.846	0.798774	0.294913	0.996406	33	0.7096
SDD	106004	4	47839933	G	A	CORIN	NP_006578.2	ENSP00000273857	R12C	FALSE	0.826	-3.2045	-3.086	-3.323	2.19604	-1.21283	0.198	-2.68	0.339	0.384	0.477261	0.138579	0.637409	23.9	0.4405
SDD	106013	2	241713606	G	A	KIF1A	NP_004312.2	ENSP00000497030	T344M	TRUE	0.329	-5.548	-5.713	-5.383	15.118	-14.4876					0.853454	0.377927	0.999574	24.9	0.9822
SDD	106016	7	86394823	A	C	GRM3	NP_000831.2	ENSP00000355316	D121A	FALSE	0.369044	-3.668	-3.759	-3.577	5.282	-7.5606	0.001	-2.03	0.537	0.868	0.734285	0.276843	0.993234	26.5	0.5463
SDD	106024	20	42143399	C	T	L3MBTL1	NP_115479.4	ENSP00000402107	A140V	FALSE	0.534	-3.1905	-3.159	-3.222	2.65735	-1.52348	0.263	-2.16	0.04	0.084	0.394014	-0.00527108	0.0957732	10.73	0.077
SDD	106024	6	17649447	T	A	NUP153	NP_001265138.1	ENSP00000444029	I525F	FALSE	0.11	-3.2535	-3.312	-3.195	2.63013	-1.16524	0.08	1.49	0.276	0.007	0.338627	-0.222592	0.0307357	9.18	0.0785
SDD	106024	6	30569385	G	A	PPP1R10	NP_002705.2	ENSP00000365694	R922C	FALSE	0.956	-4.406	-5.72	-3.092	1.43665	-11.2212	0.001	0.83	0.754	0.244	0.780528	0.108963	0.803975	31	0.8992
SDD	106024	9	17484333	G	T	CNTLN	NP_060208.2	ENSP00000370021	R1299M	FALSE	0.171	-3.368	-3.261	-3.475	5.26514	-1.66065	0.001	1.99	0.666	0.166	0.538316	1.71206e-06	0.791107	27.2	0.7211
SDD	10605	6	116600609	C	T	TSPYL1	NP_003300.1	ENSP00000357597	E129K	FALSE	0.592	-2.707	-2.953	-2.461	3.54651	-0.924979	0.082	1.62	0.096	0.003	0.355325	-0.233728	0.358945	14.64	0.0765
SDD	106126	4	160262877	C	T	RAPGEF2	NP_055062.1	ENSP00000264431	P738L	FALSE	0.034384	-3.988	-3.963	-4.013	7.084	-2.76599	0.002	1.35	0.782	0.61	0.855608	0.267093	0.981697	26.3	0.7637
SDD	106130	9	86587775	A	G	HNRNPK	NP_002131.2	ENSP00000365458	L210P	TRUE	0.015	-5.104	-5.412	-4.796	8.09943	-13.1161	0.003	-0.18	0.967	0.569	0.891609	0.340041	0.995309	25.2	0.9997
SDD	106141	16	87745049	T	C	KLHDC4	NP_060036.2	ENSP00000270583	D279G	FALSE	0.145	-1.814	-1.814			2.35598	0.764	2.32	0.201	0.027	0.280455	-0.240352	0.0254615	11.82	0.0473
SDD	106141	5	148747019	A	G	PCYOX1L	NP_076933.3	ENSP00000274569	N260S	FALSE	0.0346955	-2.9635	-2.832	-3.095	5.279	-0.259301	0.028	2.26	0.151	0.087	0.336724	-0.464092	0.0821163	16.73	0.082
SDD	10614	16	47732419	G	C	PHKB	NP_000284.1	ENSP00000313504	V1022L	FALSE	0.191	-3.1325	-3.183	-3.082	3.82703	0.206911	0.71	-0.29	0.795	0.379	0.591587	0.283824	0.67148	21.9	0.3615
SDD	10614	4	120107296	A	T	MYOZ2	NP_057683.1	ENSP00000306997	I246L	FALSE	0.415	-3.3715	-3.382	-3.361	1.63608	0.122027	0.754	0.01	0.126	0.068	0.305825	-0.127157	0.222242	15.24	0.1162
SDD	106154	1	9097664	G	T	SLC2A5	NP_003030.1	ENSP00000366641	P496H	FALSE	0.90933	-3.076	-3.127	-3.025	3.787	-1.00144	0.062	-1.11	0.062	0.144	0.231707	-0.188199	0.0457714	15.1	0.0823
SDD	106154	22	26690356	G	A	SEZ6L	NP_066938.2	ENSP00000248933	V312M	FALSE	0.126	-3.68	-3.695	-3.665	5.93201	-6.27329	0.001	0.12	0.602	0.293	0.706563	0.0635857	0.935082	26.7	0.7031
SDD	106164	19	40719678	G	C	MAP3K10	NP_002437.2	ENSP00000253055	D698H	FALSE	0.272	-2.9255	-2.869	-2.982	1.41919	-0.974301	0.057	-0.92	0.128	0.221	0.919338	-0.0555213	0.72933	22.4	0.1328
SDD	106180	5	96066560	A	G	CAST	NP_001035905.1	ENSP00000379157	D168G	FALSE	0.211	-3.1855	-3.18	-3.191	4.23779	-0.6386	0.231	2.21	0.169	0.02	0.282959	-0.182884	0.104511	20.6	0.0757
SDD	106193	4	30725844	C	A	PCDH7	NP_002580.2	ENSP00000355243	P934T	FALSE	0.549	-3.1415	-2.823	-3.46	6.19006	0.194944	0.652	1.51	0.559	0.217	0.839559	0.00958937	0.933968	22.5	0.1364
SDD	106193	4	3424704	C	T	RGS12	NP_937872.1	ENSP00000339381	R1036W	FALSE	0.058	-3.7845	-3.975	-3.594	8.43872	-4.86451	0.001	1.38	0.95	0.495	0.848513	0.0566313	0.996031	33	0.8456
SDD	106196	1	240072484	C	T	CHRM3	NP_000731.1	ENSP00000255380	S578L	TRUE	0.896	-3.5825	-3.406	-3.759	6.38696	-3.94405	0.003	0.11	0.488	0.216	0.559407	0.053801	0.748324	24	0.1303
SDD	106196	2	241708569	C	T	KIF1A	NP_004312.2	ENSP00000497030	G484D	TRUE	0.328	-4.4295	-3.892	-4.967	13.1681	-6.44					0.953736	0.381522	0.996072	26.5	0.9991
SDD	106202	12	50037148	G	A	PRPF40B	NP_001026868.2	ENSP00000448073	R783Q	FALSE	0.465	-3.107	-3.04	-3.174	3.51831	-0.68405		1.81	0.146		0.370886	-0.411188	0.0673132	18.23
SDD	106230	2	234263187	C	T	DGKD	NP_690618.2	ENSP00000264057	P8L	FALSE	0.915	-3.033	-3.033			-2.04451	0.262	-1.06	0.115	0.179	0.840076	-0.0433996	0.0634595	16.87	0.1556
SDD	106244	11	67059560	G	A	ANKRD13D	NP_997237.2	ENSP00000427130	A214T	TRUE	0.303	-2.913	-2.853	-2.973	2.38232	-3.37349	0.094	0.86	0.277	0.136	0.56014	-0.102391	0.739283	24.3	0.0741
SDD	106244	5	131927569	G	A	RAD50	NP_005723.2	ENSP00000368100	A546T	TRUE	0.023	-3.269	-3.4	-3.138	3.16797	-0.632173			0.186	0.031	0.329082	-0.443983	0.0320108	18.88	0.0813
SDD	10628	15	73617311	C	T	HCN4	NP_005468.1	ENSP00000261917	G655S	FALSE	0	-3.65	-3.277	-4.023	6.79724	-9.85041	0.001	-5.19	0.743	0.831	0.858824	0.314669	0.993712	25.7	0.9907
SDD	10631	10	101147974	T	C	CNNM1	NP_065081.2	ENSP00000349147	F864L	FALSE	0.767	-3.0375	-2.926	-3.149	3.87317	-0.368238	0.033	-1.11	0.402	0.176	0.646913	-0.0638782	0.502668	24	0.5038
SDD	106355	21	15746335	C	T	HSPA13	NP_008879.3	ENSP00000285667	R340H	FALSE	0.978	-3.143	-3.072	-3.214	2.78998	-0.438465	0.368	4.72	0.021	0.008	0.173808	-0.395174	0.0285844	1.259	0.0626
SDD	106358	1	55266404	G	A	TTC22	NP_060374.2	ENSP00000360321	R145C	FALSE	0.077193	-3.5425	-3.581	-3.504	4.595	-2.58746	0.091	0.73	0.231	0.037	0.872609	-0.157649	0.9276	24.7	0.2108
SDD	106358	9	115337481	C	T	KIAA1958	NP_001273965.1	ENSP00000440504	P374L	FALSE	0.317343	-3.312	-3.243	-3.381	5.834	-0.0993824	0.002	0.97	0.418	0.031	0.489181	-0.117093	0.722047	22.7	0.083
SDD	106375	12	13724865	G	A	GRIN2B	NP_000825.2	ENSP00000477455	R682C	TRUE	0.002	-5.2995	-5.385	-5.214	7.81256	-7.20535			0.896		0.933937	0.452957	0.998132	32	0.9692
SDD	106389	9	140058246	G	A	GRIN1	NP_015566.1	ENSP00000360616	G827R	TRUE	0.13	-5.6815	-6.458	-4.905	9.95703	-15.9206	0.001	-0.77	0.954	0.791	0.89735	0.347875	0.997009	30	1
SDD	10638	16	29676238	G	A	SPN	NP_001025459.1	ENSP00000378787	G397R	FALSE	0.216	-3.0765	-2.993	-3.16	4.2301	-1.41097	0.335	1.45	0.027	0.056	0.308562	-0.575881	0.0081805	9.673	0.0863
SDD	106392	17	73736044	C	T	ITGB4	NP_001005731.1	ENSP00000405536	R780C	FALSE	0.021	-3.348	-3.256	-3.44	5.57288	-1.55395		-1.5	0.848		0.663683	0.313541	0.996676	29.7	0.7799
SDD	106392	8	145665774	G	A	TONSL	NP_038460.4	ENSP00000386239	A417V	FALSE	0.081	-3.5465	-3.461	-3.632	9.21753	-3.84344	0.004	-0.7	0.526	0.495	0.515279	0.0179817	0.905067	25.3	0.7522
SDD	106412	16	19195177	C	T	SYT17	NP_057608.2	ENSP00000347538	S220L	FALSE	0.924	-3.245	-3.249	-3.241	5.0545	-3.19841	0.003	2.21	0.243	0.083	0.412558	-0.459251	0.115284	22.7	0.0725
SDD	106438	6	123760133	T	C	TRDN	NP_006064.2	ENSP00000333984	K316R	FALSE	0	-3.4735	-3.472	-3.475	4.18005	-2.5734	0.014	-0.1	0.109	0.015	0.438649	-0.105947	0.355541	16.68	0.1079
SDD	10645	2	36726434	G	A	CRIM1	NP_057525.1	ENSP00000280527	C482Y	TRUE	0.03	-3.348	-2.962	-3.734	6.95508	-0.718652	0	1.46	0.994	0.453	0.64925	0.257543	0.990915	27.6	0.9907
SDD	106461	11	30032605	C	T	KCNA4	NP_002224.1	ENSP00000328511	G541R	TRUE	0.03	-5.2965	-6.131	-4.462	8.70312	-15.6331	0	-4.97	0.975	0.978	0.932252	0.560675	0.999619	24.4	1
SDD	106478	11	101347250	T	G	TRPC6	NP_004612.2	ENSP00000340913	E509A	FALSE	0.01	-4.1345	-4.466	-3.803	7.42963	-12.7125	0.001	-4.88	0.827	0.927	0.65428	0.45751	0.995768	28	0.9775
SDD	106478	4	2306319	T	C	ZFYVE28	NP_066023.2	ENSP00000290974	E583G	FALSE	0.182	-2.2135	-2.388	-2.039	0.0563965	0.0229967	0.327	0.25	0.08	0.011	0.360019	-0.260096	0.0583256	10.16	0.0598
SDD	106493	16	67189401	A	G	TRADD	NP_003780.1	ENSP00000341268	L103P	FALSE	0.047	-3.6285	-3.634	-3.623	4.75391	-1.89211	0.007		0.899	0.23	0.727672	0.191871	0.764916	24.2	0.8523
SDD	106493	8	132002653	C	T	ADCY8	NP_001106.1	ENSP00000286355	E366K	FALSE	0.09	-3.8895	-3.884	-3.895	9.96753	-7.09672	0	-1.67	0.926	0.806	0.864404	0.407614	0.997459	24.8	0.9849
SDD	106543	11	68822732	G	A	TPCN2	NP_620714.2	ENSP00000294309	R114H	TRUE	0.16	-3.193	-2.844	-3.542	8.24609	-5.92364	0.02	-4.3	0.546	0.605	0.600197	0.131786	0.874723	24.6	0.1328
SDD	106543	5	92921152	C	G	NR2F1	NP_005645.1	ENSP00000325819	C141W	TRUE	0.029	-6.077		-6.077	11.1152		0	-7.59	0.876	0.949	0.943862	0.549542	0.999909	26.6	1
SDD	106560	12	3030010	C	T	TULP3	NP_001153880.1	ENSP00000380321	R59W	FALSE	0.344	-3.2865	-3.19	-3.383	4.8335	-3.80109	0.015	-3.11	0.265	0.231	0.411443	-0.111492	0.788237	20.4	0.1311
SDD	106566	12	56234508	G	A	MMP19	NP_002420.1	ENSP00000313437	R155C	TRUE	0.0268857	-3.909	-3.874	-3.944	8.9	-8.81698	0.003	1.97	0.666	0.482	0.557464	0.0250615	0.692807	31	0.316
SDD	106566	13	20608497	A	T	ZMYM2	NP_001177894.1	ENSP00000479904	H691L	TRUE	0	-3.68	-3.136	-4.224	8.29077	0.927185			0.741		0.849737	0.211746	0.986632	27	0.5336
SDD	10656	22	24176330	G	A	SMARCB1	NP_003064.2	ENSP00000494049	R374Q	TRUE	0.081	-4.403	-4.2	-4.606	9.71625	-6.43848					0.896457	0.525796	0.938371	33	0.9993
SDD	106587	15	59911698	C	T	GCNT3	NP_004742.1	ENSP00000379377	L421F	FALSE	0.176	-2.9575	-2.833	-3.082	5.88922	-3.49539	0.003	2.9	0.102	0.133	0.407475	-0.0987507	0.895935	23.1	0.2121
SDD	106612	10	122334729	C	T	PLPP4	NP_001025230.1	ENSP00000381302	R178W	FALSE	0.03	-3.723	-3.701	-3.745	8.79443	-8.29219	0	-1.04	0.955	0.786	0.808492	0.243212	0.996693	25.5	0.8471
SDD	106619	7	122130216	G	C	CADPS2	NP_060424.9	ENSP00000398481	Q591E	FALSE	0.003	-4.266	-4.739	-3.793	7.15576	-5.42366	0.001	0.56	0.863	0.41	0.558417	0.185565	0.987921	23.5	0.5844
SDD	106622	10	104250339	C	T	ACTR1A	NP_005727.1	ENSP00000358921	G27D	FALSE	0.237	-4.098	-4.298	-3.898	5.98297	-5.84307	0	-4	0.925	0.952	0.921125	0.560191	0.996863	26.6	0.9964
SDD	10662	9	26905531	C	G	PLAA	NP_001026859.1	ENSP00000380460	R789T	TRUE	0.595	-3.051	-2.882	-3.22	5.00879	-2.47041	0.008	0.81	0.462	0.205	0.484412	-0.0450119	0.717362	24.3	0.1023
SDD	106631	1	196879579	A	C	CFHR4	NP_001188479.1	ENSP00000477162	D323A	FALSE	0.001	-3.2435	-3.131	-3.356	2.93457	-4.91964						-0.120049	0.146135	9.083
SDD	106641	4	145567967	G	T	HHIP	NP_071920.1	ENSP00000296575	R47L	FALSE	0.929	-3.4375	-3.1	-3.775	9.65918	-0.295296	0.003	-1.08	0.521	0.557	0.652986	0.233224	0.986075	31	0.7447
SDD	106647	1	200944709	G	A	KIF21B	NP_060066.2	ENSP00000328494	A1498V	FALSE	0.255	-3.377	-3.374	-3.38	3.71289	-1.35177	0.236	-0.05	0.78	0.175	0.6324	0.0328526	0.923177	22.8	0.2513
SDD	106648	5	179743802	C	G	GFPT2	NP_005101.1	ENSP00000253778	V372L	FALSE	0.001	-2.244	-2.02	-2.468	-3.18884	4.03975	0.596	0.05	0.36	0.102	0.718721	-0.17642	0.375904	21.1	0.089
SDD	106678	15	67664534	C	T	IQCH	NP_001026885.2	ENSP00000336861	T280I	FALSE	0.067	-3.173	-3.173			-0.0535311	0.081	0.89	0.252	0.04	0.351757	-0.213331	0.330203	13.7	0.2461
SDD	10668	12	102069129	C	T	MYBPC1	NP_002456.2	ENSP00000354849	L957F	TRUE	0.079	-4.05	-4.05			-5.37386	0.002	0.27	0.871	0.369	0.528164	0.274864	0.957711	24.3	0.7577
SDD	10668	17	27008911	G	A	SUPT6H	NP_001307684.1	ENSP00000338143	E504K	TRUE	0.16	-4.132	-4.327	-3.937	4.70898	-3.44401	0.128	1.57	0.314	0.168	0.705386	-0.102081	0.248982	21.9	0.1132
SDD	106697	2	96992893	A	G	ITPRIPL1	NP_848590.3	ENSP00000355121	Y183C	FALSE	0.366738	-2.914	-3.188	-2.64	-1.996	-0.390023	0.266	2.39	0.105	0.117	0.295334	-0.23101	0.0138589	7.391	0.0615
SDD	106700	19	49601741	C	T	SNRNP70	NP_003080.2	ENSP00000472998	A108V	FALSE	0.026	-3.9385	-4.055	-3.822	10.1377	-11.1713		-0.85	0.75		0.894925	0.390031	0.996126	29	0.9996
SDD	106700	1	67109317	A	C	SGIP1	NP_115667.2	ENSP00000360076	Q125P	FALSE	0.387	-2.9485	-3.033	-2.864	0.772949	-4.98406	0.141	3.98	0.205	0.131	0.561407	-0.127772	0.859927	21.2	0.1041
SDD	106702	10	18885210	C	G	NSUN6	NP_872349.1	ENSP00000366519	G235A	FALSE	0.003	-3.2075	-3.164	-3.251	7.04974	-6.52526	0.007	2	0.653	0.379	0.583905	0.0623277	0.994651	25.9	0.2408
SDD	106709	3	113508646	C	T	ATP6V1A	NP_001681.2	ENSP00000273398	S316F	TRUE	0	-5.2425	-5.395	-5.09	11.242	-15.0117	0	-1.53	0.987	0.893	0.841525	0.434346	0.999346	24.1	0.9994
SDD	106727	7	99792992	G	A	STAG3	NP_036579.2	ENSP00000319318	V310I	FALSE	0.078	-3.5765	-3.792	-3.361	4.88818	-2.10031	0.046	1.43	0.553	0.158	0.638365	-0.0702384	0.764626	25.9	0.0991
SDD	106730	15	50168564	C	T	ATP8B4	NP_079113.2	ENSP00000284509	V980M	FALSE	0.207174	-2.836	-3	-2.672	-0.401	-1.28818	0.279	0.28	0.216	0.036	0.285675	-0.190037	0.193656	2.522	0.0722
SDD	106736	2	200213432	G	A	SATB2	NP_056080.1	ENSP00000405420	R389C	TRUE	0	-5.2755	-5.701	-4.85	6.56183	-11.1345	0	0.03	0.954	0.909	0.953053	0.352253	0.995682	32	0.999
SDD	106745	1	6648123	T	A	ZBTB48	NP_001265576.1	ENSP00000366902	N461K	FALSE	0.053	-3.5155	-3.609	-3.422	4.97144	-6.44332	0.112	2.36	0.575	0.111	0.836604	-0.298751	0.905427	4.325	0.8306
SDD	106745	4	25864403	G	T	SEL1L3	NP_056002.2	ENSP00000382767	P19Q	FALSE	0.923497	-3.599	-3.219	-3.979	10.144	-0.0889272	0.415	2.43	0.248	0.02	0.834641	-0.279097	0.119403	12.83	0.0655
SDD	106745	6	38560481	G	C	BTBD9	NP_443125.1	ENSP00000497066	L229V	FALSE	0.016	-3.9255	-3.81	-4.041	8.12842	-7.33192					0.724528	0.311069	0.984064	24.6	0.9419
SDD	106753	2	206480188	C	A	PARD3B	NP_689739.4	ENSP00000351618	P1028H	FALSE	0.173	-3.2905	-3.177	-3.404	6.64282	-1.4113	0.017	2.27	0.623	0.126	0.466349	-0.104592	0.907739	24.1	0.1087
SDD	106758	10	1126376	C	T	WDR37	NP_054742.2	ENSP00000263150	S119F	TRUE	0.141	-3.941	-4.152	-3.73	5.47641	-10.0193	0.032	-0.13	0.661	0.479	0.855628	0.337781	0.894802	26.2	0.9873
SDD	106762	11	61026479	G	A	VWCE	NP_689931.2	ENSP00000334186	P846S	FALSE	0.34	-2.7025	-3.046	-2.359	-0.121704	-1.21639	0.47	-0.35	0.044	0.072	0.393217	-0.263309	0.015508	0.738	0.0637
SDD	106765	19	828364	G	A	AZU1	NP_001691.1	ENSP00000233997	A65T	FALSE	0.051	-3.062	-2.942	-3.182	8.95444	-1.88296	0	-3.65	0.353	0.428	0.47711	0.126365	0.78692	21.1	0.3102
SDD	106778	10	61572525	C	T	CCDC6	NP_005427.2	ENSP00000263102	V239I	FALSE	0.0386905	-3.205	-3.257	-3.153	1.548	-2.03244	0.143	-1.53	0.484	0.308	0.68547	-0.158843	0.137684	21.7	0.1488
SDD	106792	3	169896712	C	A	PHC3	NP_079223.3	ENSP00000420294	S10I	FALSE	0.747	-3.3025	-3.517	-3.088	2.01782	-2.32482	0.002	1.48	0.193	0.016	0.407686	-0.206148	0.417884	11.7
SDD	106793	10	104404828	C	G	TRIM8	NP_112174.2	ENSP00000496301	R152G	TRUE	0.164	-4.2225	-4.366	-4.079	6.61072	-2.25816					0.871366	0.253542	0.991579	25.4	0.9967
SDD	106793	1	209849150	G	C	G0S2	NP_056529.1	ENSP00000355996	G41R	TRUE	0	-3.4425	-3.427	-3.458	7.72365	-2.24808	0.002		0.424	0.222	0.679243	-0.00425923	0.979563	24.2	0.8231
SDD	106803	14	104462114	A	T	TDRD9	NP_694591.2	ENSP00000387303	S450C	TRUE	0.00847018	-4.046	-3.841	-4.251	11.61	-4.1584	0	-0.98	0.908	0.866	0.768526	0.269562	0.998238	29.3	0.6542
SDD	106803	2	218713553	G	A	TNS1	NP_072174.3	ENSP00000171887	R438W	TRUE	0.02	-3.3495	-3.429	-3.27	3.6687	-3.51502	0.002	-2.91	0.352	0.36	0.33473	0.0560246	0.92402	25.4	0.1807
SDD	106803	5	170834708	G	A	NPM1	NP_002511.1	ENSP00000296930	G259D	TRUE	0.439	-3.4865	-3.809	-3.164	5.60419	-6.44754	0.315	0.84	0.543	0.215	0.624822	-0.0488666	0.900047	22.8	0.9605
SDD	106819	12	110019262	C	T	MVK	NP_000422.1	ENSP00000228510	S145F	FALSE	0.018	-4.267	-4.496	-4.038	11.9676	-13.2959	0	-4.38	0.965	0.96	0.544069	0.5766	0.999618	26	0.8969
SDD	106819	12	21294551	C	T	SLCO1B1	NP_006437.3	ENSP00000256958	P15S	FALSE	0.669	-2.7355	-2.848	-2.623	1.18542	0.340044	0.264	0.2	0.18	0.034	0.254367	-0.28844	0.0610169	0.003	0.0727
SDD	106848	15	79214498	C	T	CTSH	NP_004381.2	ENSP00000220166	A328T	FALSE	0.203	-3.4145	-3.437	-3.392	6.3717	-5.47188	0.054	1.74	0.468	0.265	0.522674	-0.225376	0.456974	26.1	0.5136
SDD	106851	4	39409252	T	C	KLB	NP_783864.1	ENSP00000257408	M228T	FALSE	0.219	-2.4175	-2.783	-2.052	-4.01453	3.2598	1	1.59	0.094	0.04	0.325913	-0.364094	0.0627192	1.019	0.0637
SDD	106873	6	26124663	G	A	H2AC6	NP_003503.1	ENSP00000367022	G68D	TRUE	0.0307841	-3.501	-3.66	-3.342	6.264	-10.1149	0	-0.43	0.936	0.813	0.939949	0.440925	0.999704	32	0.9994
SDD	106886	2	135763070	G	A	MAP3K19	NP_079328.3	ENSP00000376647	S57F	FALSE	0.777	-3.6025	-3.469	-3.736	5.87549	-1.0441				0.238	0.414919	0.0153815	0.714108	22.6	0.136
SDD	106903	19	1923070	G	A	SCAMP4	NP_524558.1	ENSP00000316007	G133S	FALSE	0.056	-3.501	-3.421	-3.581	8.66791	-7.05476	0	-0.16	0.949	0.725	0.585671	0.188758	0.95763	29.6	0.8918
SDD	106915	3	21465463	G	T	ZNF385D	NP_078973.1	ENSP00000281523	P316T	FALSE	0.235	-2.739	-2.857	-2.621	-1.06256	0.678387	0.39	1.63	0.612	0.281	0.586069	-0.00151385	0.494752	23.3	0.066
SDD	106922	18	43219774	G	A	SLC14A2	NP_009094.3	ENSP00000255226	G303S	FALSE	0.982	-3.1065	-2.92	-3.293	2.78076	-2.90118	0.255	0.74	0.933	0.532	0.582943	0.122872	0.323454	24.9	0.1496
SDD	106931	13	26911760	C	T	CDK8	NP_001251.1	ENSP00000370938	S62L	TRUE	0.117	-5.754	-5.754			-15.3397	0	-0.18	0.749	0.644	0.855433	0.327311	0.999169	29.9	0.9996
SDD	106931	6	82924052	T	C	IBTK	NP_056340.2	ENSP00000305721	K699R	TRUE	0.13229	-3.532	-3.656	-3.408	4.532	-1.16633	0.016	1.79	0.072	0.117	0.421639	-0.276767	0.342725	16.14	0.0828
SDD	106931	7	150725672	C	T	ABCB8	NP_001269220.1	ENSP00000297504	R24C	TRUE	0.919467	-3.3095	-2.87	-3.749	10.131	-1.4948	0.149	-2.85	0.299	0.18	0.347714	0.0171993	0.601954	19.63	0.103
SDD	106950	16	30364862	C	T	CD2BP2	NP_001230575.1	ENSP00000456935	R212Q	FALSE	0.002	-2.861	-2.785	-2.937	1.93707	-0.470519	0.595	1.51	0.149		0.33723	-0.379923	0.121202	17.51	0.0689
SDD	106950	1	54605468	G	A	CDCP2	NP_963840.2	ENSP00000360381	R359C	FALSE	0.572	-3.7405	-3.688	-3.793	8.84351	-8.49237	0.055	2.16	0.721	0.305	0.491085	-0.303692	0.244754	28.9	0.5483
SDD	106960	1	245018331	C	G	HNRNPU	NP_114032.2	ENSP00000491215	G790R	TRUE	0.486	-4.943	-5.968	-3.918	6.31573	-11.3318					0.8831	0.176515	0.923398	28.4	0.9901
SDD	106990	12	39695328	T	C	KIF21A	NP_060111.2	ENSP00000354851	I1616V	FALSE	0.371	-3.456	-3.292	-3.62	5.18311	-0.041569	0.049	0.72	0.249	0.114	0.470533	-0.0682111	0.450141	23.2	0.1286
SDD	106990	6	109283327	A	T	ARMC2	NP_115507.4	ENSP00000376417	N717Y	FALSE	0.073	-3.777	-3.974	-3.58	6.23828	-6.21841	0.014	0.71	0.628	0.232	0.469018	-0.0462094	0.984948	27.1	0.2294
SDD	106994	14	23518391	G	A	CDH24	NP_071923.2	ENSP00000380517	P602L	FALSE	0.20052	-3.4595	-3.531	-3.388	6.758	-5.58698	0	1.77	0.583	0.339	0.696169	0.12308	0.997589	26.8	0.3089
SDD	106994	7	140373463	C	A	ADCK2	NP_443085.2	ENSP00000072869	F111L	FALSE	0.753	-2.6165	-2.884	-2.349	0.048523	1.0914	0.738	1	0.051	0.052	0.413465	-0.30499	0.111528	9.803	0.2247
SDD	107001	4	1807371	C	G	FGFR3	NP_001156685.1	ENSP00000339824	N542K	TRUE	0.006	-3.648	-4.151	-3.145	5.88025	-10.4383	0	-2.7	0.985	0.693	0.847136	0.120837	0.998335	24.3	0.9887
SDD	107009	2	54482768	G	C	TSPYL6	NP_001003937.2	ENSP00000417919	A174G	TRUE	0.502	-2.348	-2.606	-2.09	-0.0975952	-0.167378	0.455	2.15	0.036	0.047	0.21233	-0.410931	0.139285	0.235	0.1024
SDD	107009	4	96044981	C	T	BMPR1B	NP_001194.1	ENSP00000426617	H124Y	TRUE	0.151	-2.9655	-2.944	-2.987	4.12683	-0.286067	0.654	-1.56	0.468	0.499	0.69605	0.174616	0.289913	21.1	0.1098
SDD	107023	19	49351198	G	A	PLEKHA4	NP_065955.2	ENSP00000263265	P509S	FALSE	0.0951009	-3.098	-3.057	-3.139	4.645	-0.813479	0.113	1.6	0.361	0.132	0.422314	-0.113504	0.494776	23	0.077
SDD	107035	15	58467176	C	T	AQP9	NP_066190.2	ENSP00000219919	H146Y	FALSE	0.196	-2.959	-2.915	-3.003	3.62726	-2.76285	0.093	2.79	0.384	0.033	0.366288	-0.310915	0.103852	10.02	0.1184
SDD	107035	16	919999	C	T	LMF1	NP_073610.2	ENSP00000262301	A434T	FALSE	0.108	-2.592	-2.456	-2.728	3.44733	-3.22898	0.204	2.06	0.29	0.057	0.320775	-0.242721	0.0958251	6.818	0.0754
SDD	107059	12	101016063	T	C	GAS2L3	NP_001290059.1	ENSP00000266754	I220T	TRUE	0.022	-3.551	-3.236	-3.866	9.70789	-6.16371	0.001	1.57	0.757	0.18	0.753667	-0.0692665	0.987246	25.2	0.8432
SDD	107059	22	25603042	C	G	CRYBB3	NP_004067.1	ENSP00000215855	R167G	TRUE	0.035	-3.345	-3.419	-3.271	6.70953	-6.7826	0.001	-1.16	0.839	0.867	0.483801	0.378967	0.992853	25.1	0.7403
SDD	107059	8	145235426	G	A	MROH1	NP_115826.3	ENSP00000321737	A188T	TRUE	0.108395	-4.6065	-4.609	-4.604	7.611	-1.03213	0.004	-0.2	0.691	0.396	0.460957	0.01147	0.852032	32	0.1717
SDD	107076	1	17715309	T	C	PADI6	NP_997304.3	ENSP00000483125	V299A	FALSE	-1	-3	-3.185	-2.815	3.83624	-2.31059			0.349		0.393577	0.106189		18.06
SDD	107088	1	154562778	A	T	ADAR	NP_056655.3	ENSP00000431794	I793N	TRUE	0.004	-3.7215	-3.605	-3.838	5.59253	-2.58657				0.73	0.836773	0.302292	0.990788	29.3	0.9887
SDD	107088	1	19992694	G	C	HTR6	NP_000862.1	ENSP00000289753	A150P	TRUE	0	-3.5325	-3.621	-3.444	6.46314	-6.10992	0.002	-0.74	0.681	0.613	0.728995	0.170411	0.976751	26.3	0.7068
SDD	107088	6	108067938	C	A	SCML4	NP_932347.2	ENSP00000358016	V148F	TRUE	0.024	-3.262	-2.967	-3.557	8.84705	-7.40679	0.001	0.48	0.914	0.511	0.671255	0.302254	0.997819	25.9	0.8804
SDD	10708	11	119148891	T	A	CBL	NP_005179.2	ENSP00000264033	Y371N	TRUE	0.002	-4.3255	-4.828	-3.823	9.04358	-14.011	0	-4.07	0.974	0.958	0.901185	0.497217	0.99432	29.5	0.9997
SDD	10708	1	62586868	G	A	PATJ	NP_001337074.2	ENSP00000494277	A1636T	TRUE	0.354707	-2.9585	-3.164	-2.753	0.103	0.194905					0.209402	-0.56183	0.0252106	0.011	0.0598
SDD	107108	9	13221477	G	A	MPDZ	NP_001362342.1	ENSP00000320006	T257M	TRUE	0.121968	-2.991	-3.085	-2.897	5.155	-2.41322	0.015	0.99	0.738	0.386	0.648729	0.0282141	0.654744	23.7	0.0868
SDD	10710	X	20206617	G	A	RPS6KA3	NP_004577.1	ENSP00000368884	T210I	FALSE	0.02	-6.0185	-6.311	-5.726	8.3772	-13.1299	0.004	1.89	0.771	0.382	0.926571	-0.0308421	0.989215	33	0.9975
SDD	107111	19	3977875	T	C	EEF2	NP_001952.1	ENSP00000307940	Q670R	TRUE	0.07	-4.313	-4.458	-4.168	8.59064	-11.6189	0	1.45	0.889	0.703	0.836826	0.305047	0.99895	27.9	0.987
SDD	107125	10	105164938	A	G	PDCD11	NP_055791.1	ENSP00000358812	M188V	FALSE	0.056	-3.619	-3.442	-3.796	9.17236	-1.3353	0	1	0.729	0.467	0.637559	0.102122	0.983941	26.5	0.3835
SDD	107140	19	8464780	G	A	RAB11B	NP_004209.2	ENSP00000333547	S25N	TRUE	0.126	-4.273	-4.065	-4.481	9.18166	-10.4183	0	-2.12	0.974	0.839	0.911321	0.209484	0.998083	28.2	0.9974
SDD	107140	2	103148938	A	G	SLC9A4	NP_001011552.2	ENSP00000295269	N730D	TRUE	0.849784	-2.903	-2.934	-2.872	1.886	-0.0903943	0.275	0.94	0.067	0.087	0.296941	-0.333354	0.103024	2.219	0.065
SDD	107161	19	42794868	G	T	CIC	NP_055940.3	ENSP00000458663	A650S	TRUE	0.04	-2.92	-2.926	-2.914	1.75244	-0.37842		-4.69	0.293		0.451726	0.0492655	0.100154	2.595	0.0754
SDD	107177	11	66283354	G	A	BBS1	NP_078925.3	ENSP00000317469	E181K	TRUE	0.085	-3.1455	-2.983	-3.308	4.27063	-0.76182	0.018	-2.73	0.66	0.662	0.718449	0.237203	0.963518	25.3	0.1088
SDD	10719	4	139163098	C	G	SLC7A11	NP_055146.1	ENSP00000280612	R42S	FALSE	0.109071	-3.4	-3.445	-3.355	4.557	-4.48014	0.005	-3.48	0.137	0.562	0.315551	0.094025	0.952402	26.4	0.769
SDD	107209	10	127418001	G	T	EDRF1	NP_056423.2	ENSP00000336727	M289I	TRUE	0.063	-3.758	-3.279	-4.237	9.32886	1.05982	0.006		0.768	0.399		0.447184	0.970925	24	0.9702
SDD	107209	10	127461256	C	T	MMP21	NP_671724.1	ENSP00000357798	R254H	TRUE	0.003	-2.9475	-2.936	-2.959	3.66238	-2.35758	0.547	2.25	0.239	0.034	0.70214	-0.529278	0.0510124	18.55	0.0885
SDD	107218	14	58975339	C	G	KIAA0586	NP_001231118.1	ENSP00000346359	P1465R	TRUE	0.117	-3.566	-3.353	-3.779	6.17725	-0.308736	0.007	0.83	0.212	0.063	0.280457	-0.10521	0.367286	22.7	0.1115
SDD	107247	4	107114819	C	T	TBCK	NP_001156908.2	ENSP00000273980	R669Q	TRUE	0.125	-3.1265	-3.251	-3.002	0.380737	-3.85116	0.207	2.91	0.858	0.394	0.831845	-0.124305	0.18682	22.9	0.1491
SDD	107256	10	15154796	G	A	NMT2	NP_001295224.1	ENSP00000367392	S433L	FALSE	0.075	-3.293	-3.315	-3.271	1.93176	0.832186	0.361		0.23	0.12	0.590953	-0.277954	0.310862	17.03	0.0538
SDD	107256	17	79634863	C	T	CCDC137	NP_954981.1	ENSP00000329360	P80L	FALSE	0.052	-3.1545	-3.146	-3.163	6.05072	-1.20218	0.047	-2.53	0.252	0.112	0.334127	-0.226951	0.185467	20.5	0.175
SDD	107257	9	136901310	G	A	BRD3	NP_031397.1	ENSP00000305918	R594W	FALSE	0.08	-4.61	-4.71	-4.51	10.3832	-10.1294	0	1.68	0.818	0.331	0.79	0.194526	0.995042	29.6	0.9891
SDD	107282	15	67500941	C	T	AAGAB	NP_078942.3	ENSP00000261880	G225D	FALSE	0.227	-2.744	-2.783	-2.705	-1.81244	-0.0285841	0.535	0.98	0.088	0.044	0.311209	-0.430467	0.0189573	0.7	0.0741
SDD	107311	19	33904543	G	C	PEPD	NP_000276.2	ENSP00000244137	F226L	TRUE	0.001	-3.0885	-2.958	-3.219	6.85086	-5.10757	0	-0.97	0.828	0.563	0.738193	0.134021	0.994643	24.3	0.997
SDD	107349	1	36759519	C	T	THRAP3	NP_005110.2	ENSP00000346634	R700W	FALSE	0.171	-3.4355	-3.474	-3.397	3.83545	-2.48219	0.001	2.46	0.504	0.144	0.684001	-0.0277734	0.897092	25	0.294
SDD	107375	17	37880211	T	C	ERBB2	NP_004439.2	ENSP00000269571	I752T	FALSE	0.015	-4.1465	-4.281	-4.012	8.52466	-9.38132	0	-1.98	0.949	0.97	0.844308	0.443716	0.995744	28.6	0.9961
SDD	10740	17	7477587	C	G	EIF4A1	NP_001407.1	ENSP00000293831	D11E	FALSE	0.872	-2.587	-2.649	-2.525	-1.58002	0.148151	0.607	1.85	0.126	0.202		0.0757652	0.689119	22.7	0.0918
SDD	107430	20	43043154	C	A	HNF4A	NP_787110.2	ENSP00000315180	S145Y	TRUE	0.227	-3.0625	-2.964	-3.161	2.65717	-4.00748	0.005	-3.44	0.716	0.552	0.645641	0.269956	0.957768	24	0.1262
SDD	107436	20	19674003	G	C	SLC24A3	NP_065740.2	ENSP00000333519	W475C	FALSE	0.121	-3.382	-3.382	-3.382	3.11401	-6.07256	0.043	-0.18	0.786	0.436	0.84126	0.293899	0.990673	24.1	0.4099
SDD	107546	11	68201253	G	A	LRP5	NP_002326.2	ENSP00000294304	R1316H	TRUE	0.412	-3.217	-3.105	-3.329	4.30249	-2.25987	0.128	-3.85	0.734	0.755	0.610402	0.147816	0.380723	26	0.1781
SDD	107546	12	124071403	G	A	TMED2	NP_001308374.1	ENSP00000262225	R97Q	TRUE	0.001	-2.959	-2.954	-2.964	-0.496551	0.894009	0.672	1.01	0.415	0.147	0.68647	-0.0989456	0.92656	22.9	0.1267
SDD	107561	11	72398515	C	G	ARAP1	NP_056057.2	ENSP00000335506	R1140P	FALSE	0.26	-3.781	-3.761	-3.801	9.3252	-4.14635	0.181	-1.02	0.844	0.477	0.771977	0.265775	0.899305	23.3	0.9834
SDD	107561	1	150528033	C	T	ADAMTSL4	NP_061905.2	ENSP00000271643	R455C	FALSE	0.225	-3.4795	-3.6	-3.359	7.53101	-8.58309	0.001	0.02	0.76	0.287	0.513455	0.0767885	0.995301	26.1	0.3083
SDD	107587	2	112687096	C	T	MERTK	NP_006334.2	ENSP00000295408	T154I	FALSE	0.213	-3.2945	-3.192	-3.397	3.3233	-1.70051	0.418	-1	0.093	0.078	0.51276	-0.151863	0.0481652	12.57	0.1342
SDD	107651	17	4799387	A	G	MINK1	NP_722549.2	ENSP00000347427	M1152V	TRUE	0.19	-3.879	-3.767	-3.991	9.29077	-7.18247	0.001	3.51	0.626	0.446	0.779901	0.0935718	0.978855	24	0.9153
SDD	107651	21	33069058	C	A	SCAF4	NP_065757.1	ENSP00000286835	L261F	TRUE	0.069	-3.781	-3.508	-4.054	10.0115	-3.80645	0.017	-0.4	0.768	0.349	0.812515	0.109804	0.978181	23.6	0.986
SDD	107660	12	121434371	C	T	HNF1A	NP_000536.6	ENSP00000257555	P379S	FALSE	0.064	-3.46	-3.054	-3.866	5.91486	-0.985996	0	-5.75	0.92	0.967	0.81223	0.332615	0.880183	26.2	0.7236
SDD	107660	2	220073054	T	C	ZFAND2B	NP_001257927.1	ENSP00000411334	C171R	FALSE	0.348	-2.568	-2.664	-2.472	-4.92749	3.65739	0.069	1	0.071	0.037	0.312337	-0.255919	0.0132836	15.59	0.0701
SDD	107660	6	31911080	G	C	C2	NP_000054.2	ENSP00000299367	W480S	FALSE	0.047	-4.1245	-4.228	-4.021	11.8345	-11.6505	0	0.82	0.823	0.41	0.675977	0.141277	0.999714	32	0.9516
SDD	107684	2	54149673	T	C	PSME4	NP_055429.2	ENSP00000384211	N676S	FALSE	0.058	-3.1685	-3.067	-3.27	4.77124	1.66546	0.253	3.67	0.447	0.147	0.602405	-0.256798	0.49462	18.86	0.2893
SDD	107684	8	56686248	T	G	TGS1	NP_079107.6	ENSP00000260129	I24R	FALSE	0.721	-3.474	-3.01	-3.938	12.4203	0.0336959	0	2.22	0.782	0.367	0.635445	0.185004	0.960304	27.9	0.8738
SDD	10768	19	42526205	G	A	GRIK5	NP_002079.3	ENSP00000470251	R531C	FALSE	-1	-4.053	-3.959	-4.147	10.2931	-9.3503		2.61	0.417		0.897259	-0.154371	0.820152	28.7	0.5654
SDD	10773	2	137814479	C	G	THSD7B	NP_001303278.1	ENSP00000387145	P210R	FALSE	0.21	-3.7395	-3.756	-3.723	7.05273	-4.72797	0.002	2.19	0.921	0.548	0.445914	0.249609	0.989187	23.7	0.3524
SDD	107745	2	149686910	C	A	KIF5C	NP_004513.1	ENSP00000393379	T93N	TRUE	0.025	-5.401	-5.63	-5.172	11.4323	-15.0478	0.001	-1.75	0.921	0.847	0.859399	0.194522	0.99402	25.3	0.9962
SDD	107760	14	104643336	C	T	KIF26A	NP_056471.1	ENSP00000388241	P1404L	FALSE	0.0508021	-2.8025	-2.779	-2.826	5.6	-1.19369	0.716	-1.03	0.11	0.14	0.59925	-0.147666	0.0493801	7.397	0.0883
SDD	107760	17	1690881	C	T	SMYD4	NP_443160.2	ENSP00000304360	V519I	FALSE	0.041	-2.3835	-2.848	-1.919	-1.25439	-0.741759	0.612	-1.41	0.199	0.206	0.28962	-0.203181	0.0716004	0.071	0.0789
SDD	107765	1	150318907	A	G	PRPF3	NP_004689.1	ENSP00000315379	K595E	FALSE	0.077	-4.155	-4.425	-3.885	5.97012	-6.84385	0.005	-1.27	0.575	0.531	0.801383	0.145503	0.957703	27	0.7241
SDD	107785	15	89070906	T	C	DET1	NP_060466.2	ENSP00000456340	N410D	FALSE	0.079	-3.27	-3.104	-3.436	7.07788	0.089927	0.038		0.939		0.831429	0.0762323	0.978298	26.2	0.9721
SDD	107785	16	11773305	G	A	TXNDC11	NP_001290376.1	ENSP00000349439	R902C	FALSE	0.345324	-3.1385	-3.167	-3.11	6.888	-4.57196	0.007	2.6	0.457	0.066	0.300887	-0.413278	0.243732	24.4	0.2049
SDD	107785	7	151082198	C	A	WDR86	NP_001271189.1	ENSP00000419162	R301L	FALSE	0.904	-2.864	-2.61	-3.118	5.13397	-0.291787	0.006	0.11	0.591	0.079		-0.0854525	0.37671	21.5	0.1197
SDD	107788	3	12963626	G	A	IQSEC1	NP_001363867.1	ENSP00000497029	A724V	TRUE	0.027027	-3.1	-2.944	-3.256	5.802	-7.37885					0.785342	0.123867	0.921807	23.7	0.8047
SDD	107788	3	25635040	C	T	RARB	NP_000956.2	ENSP00000332296	T278I	TRUE	0.015	-3.6795	-3.338	-4.021	6.1344	-7.83689	0.026	-4.04	0.737	0.89	0.921997	0.507363	0.99807	25.8	0.9754
SDD	107792	19	50435724	C	T	ATF5	NP_036200.2	ENSP00000470633	A75V	FALSE	0.575	-3.2315	-3.259	-3.204	1.53717	-3.91627		0.7	0.563		0.738824	-0.330034	0.231585	22.3	0.1866
SDD	107799	1	40773865	G	A	COL9A2	NP_001843.1	ENSP00000361834	T300M	TRUE	0.014	-2.911	-3.049	-2.773	0.277466	-0.64423	0.22	-3.28	0.231	0.26	0.342246	-0.158801	0.702579	23.1	0.0812
SDD	107799	4	1725257	C	T	TACC3	NP_006333.1	ENSP00000326550	R37C	TRUE	0.497093	-2.9235	-3.134	-2.713	3.587	-1.60557	0.163	2.11	0.473	0.074	0.332601	-0.314467	0.0275495	14.96	0.0921
SDD	107807	4	6865422	C	T	KIAA0232	NP_055558.2	ENSP00000303928	R1105W	FALSE	0.0315789	-3.8875	-4.054	-3.721	7.04	-1.7388	0		0.87	0.409	0.933411	0.09525	0.725526	22	0.7825
SDD	107828	12	56531422	G	A	ESYT1	NP_001171725.1	ENSP00000267113	R703Q	FALSE	0.317881	-3.1485	-3.197	-3.1	2.304	-0.987901	0.045	-0.43	0.283	0.177	0.417689	-0.0900479	0.630407	26.5	0.1132
SDD	107828	7	144096061	C	G	NOBOX	NP_001073882.3	ENSP00000419457	C484S	FALSE	0.192	-3.168	-2.868	-3.468	5.86646	1.79367	0.021	1.6	0.268	0.035	0.266631	-0.184123	0.153189	14.42	0.2107
SDD	107831	11	16810764	C	T	PLEKHA7	NP_001316559.1	ENSP00000435389	R1079H	FALSE	0.698	-3.48	-3.5	-3.46	8.07544	-3.71603	0	0.71	0.812	0.515	0.801498	0.0305792	0.944958	28	0.7924
SDD	107831	3	15721049	A	G	ANKRD28	NP_056014.2	ENSP00000382379	L774P	FALSE	0.092	-3.9495	-4.071	-3.828	7.5719	-5.47674	0.043	-0.49	0.875	0.663	0.830529	0.389587	0.982945	28.7	0.9782
SDD	107836	16	84035501	T	G	NECAB2	NP_061938.2	ENSP00000307449	L371R	TRUE	0.178	-2.3655	-2.206	-2.525	2.57007	-5.05073	0.001	2.05	0.607	0.262	0.561366	0.119225	0.984355	26.3	0.167
SDD	107836	1	154744850	C	T	KCNN3	NP_002240.3	ENSP00000271915	G350D	TRUE	0.001	-4.0675	-3.986	-4.149	7.15637	-7.84156	0.029	-3.99	0.968	0.923	0.888561	0.454535	0.990083	26	0.9876
SDD	107842	16	57509763	T	C	DOK4	NP_060580.2	ENSP00000344277	K58R	FALSE	0.134	-3.159	-2.781	-3.537	4.65375	-2.97455	0.105	-0.95	0.532	0.321	0.6786	-0.0132937	0.857412	31	0.1446
SDD	107857	20	21377611	G	C	NKX2-4	NP_149416.1	ENSP00000345147	P143A	FALSE	0.073	-2.8825	-2.788	-2.977	7.56116	-4.36994	0.01	-0.9	0.28	0.386	0.898572	0.00293537	0.992343	25.5	0.1682
SDD	10785	X	18915375	C	T	PHKA2	NP_000283.1	ENSP00000369274	R1063Q	FALSE	0.674	-3.797	-3.693	-3.901	6.24023	-0.40405	0.049	-4.62	0.177	0.425	0.306137	0.0742462	0.217032	19.3	0.069
SDD	107860	4	145633104	G	C	HHIP	NP_071920.1	ENSP00000296575	C435S	FALSE	0.001	-4.127	-4.308	-3.946	11.1901	-7.95817	0.018	2.79	0.899	0.611	0.714648	0.228365	0.991892	26.7	0.9966
SDD	107885	2	1638049	C	A	PXDN	NP_036425.1	ENSP00000252804	C1456F	TRUE	0.594	-3.5705	-3.569	-3.572	7.19092	-4.79373	0	-2.98	0.828	0.812	0.506454	0.481725	0.999629	24.2	0.7588
SDD	107888	1	63005433	C	T	DOCK7	NP_001258928.1	ENSP00000413583	R1059Q	TRUE	0.026	-3.7305	-3.64	-3.821	5.74951	-0.451241			0.787		0.766891	0.0374589	0.988321	29.3
SDD	107891	2	12858456	C	T	TRIB2	NP_067675.1	ENSP00000155926	P8L	FALSE	0.869117	-3.7085	-3.261	-4.156	6.372	-0.390203	0.009	0.83	0.771	0.42	0.869211	0.23713	0.984355	28	0.8158
SDD	107894	X	53432009	G	A	SMC1A	NP_006297.2	ENSP00000323421	R711W	FALSE	0.02	-5.628	-5.367	-5.889	10.9302	-5.40061	0	-1.25	0.89	0.846	0.929015	0.47406	0.999259	25.9	0.9938
SDD	107897	9	117848461	C	T	TNC	NP_002151.2	ENSP00000265131	V517I	FALSE	0.066	-2.9985	-2.971	-3.026	1.59326	-1.13974	0.678	2.92	0.081	0.028	0.229525	-0.475624	0.0422399	0.576	0.086
SDD	107917	5	73207125	G	A	ARHGEF28	NP_001073948.2	ENSP00000441913	S1558N	FALSE	0.086	-3.58	-3.446	-3.714	7.39111	-1.72068	0.006	3.01	0.277	0.052	0.410282	-0.196952	0.824263	21.4	0.0948
SDD	107923	11	59612865	T	C	CBLIF	NP_005133.2	ENSP00000257248	Q21R	FALSE	0.338	-2.9115	-3.149	-2.674	1.27673	-0.927106	0.682	1.3	0.078	0.074	0.254365	-0.336387	0.028785	4.897	0.0637
SDD	107923	4	69095029	G	C	TMPRSS11B	NP_872308.2	ENSP00000330475	L298V	FALSE	0.018	-3.182	-3.138	-3.226	5.01208	-0.922363	0.444	-2.5	0.166	0.254	0.331554	-0.0631917	0.36992	21.1	0.1223
SDD	107930	16	30441264	C	G	DCTPP1	NP_077001.1	ENSP00000322524	G13A	FALSE	0.957	-3.153	-3.31	-2.996	2.11853	0.367604	0.418		0.15	0.016	0.42776	-0.354732	0.0545149	0.02	0.0699
SDD	107942	2	74719516	C	T	TTC31	NP_071937.4	ENSP00000233623	R369W	FALSE	0.021	-3.504	-3.605	-3.403	7.28052	-5.6527	0.004	0.19	0.4	0.205	0.598615	-0.185688	0.723317	22.2	0.1423
SDD	107945	10	74994588	G	A	FAM149B1	NP_775483.1	ENSP00000242505	D456N	TRUE	0.108	-3.3015	-3.258	-3.345	6.22553	0.00856848	0.045	0.92	0.144	0.081	0.375373	-0.213796	0.679729	21.9	0.0777
SDD	107945	7	53103740	C	T	POM121L12	NP_872401.3	ENSP00000386133	R126C	TRUE	0.055914	-2.7625	-3.026	-2.499	1.391	-1.1123	0.011	1.89	0.236	0.095	0.309113	-0.205439	0.537989	19.41	0.2255
SDD	10796	17	7134082	G	A	DVL2	NP_004413.1	ENSP00000005340	R77C	FALSE	0.194262	-2.99	-2.891	-3.089	4.156	-5.49645	0.055	0.91	0.446	0.258	0.657833	-0.262154	0.466873	29.7	0.1212
SDD	108008	15	74220095	C	G	LOXL1	NP_005567.2	ENSP00000261921	P324R	FALSE	0.034	-3.016	-3	-3.032	4.3963	-0.901149	0.028	2.27	0.283	0.087	0.806192	-0.230239	0.18558	18.36	0.1771
SDD	108015	17	56350865	G	A	MPO	NP_000241.1	ENSP00000225275	R511C	FALSE	0.021	-3.7755	-3.714	-3.837	11.6531	-8.23679	0	-0.89	0.936	0.785	0.481715	0.180234	0.998107	32	0.8276
SDD	10802	11	10536534	G	A	RNF141	NP_057506.2	ENSP00000265981	P208S	TRUE	0.151	-3.623	-3.569	-3.677	8.55386	-1.51311	0	-0.59	0.724	0.492	0.742911	0.181809	0.995497	27	0.9233
SDD	10802	16	57695718	C	T	ADGRG1	NP_005673.3	ENSP00000456794	R598W	TRUE	0.023	-3.78	-3.688	-3.872	6.6366	-4.34868	0	0.78	0.739		0.557374	-0.191131	0.621329	27.9	0.1569
SDD	108062	22	51011419	C	T	CPT1B	NP_004368.1	ENSP00000312189	E413K	FALSE	0.002	-3.555	-3.555			-7.73298	0.001	-2.83	0.964	0.93	0.747149	0.482677	0.99942	26.9	0.8482
SDD	108062	2	25354741	G	A	EFR3B	NP_055786.1	ENSP00000384081	E370K	FALSE	0.019	-3.5345	-3.503	-3.566	5.00415	-0.586257	0.008	-0.17	0.374	0.275	0.794953	0.235411	0.966498	26.3	0.5801
SDD	108075	8	21905573	G	A	FGF17	NP_003858.1	ENSP00000352414	R155Q	FALSE	0.021	-3.709	-3.574	-3.844	5.66214	-5.59618	0.004	-2.49	0.718	0.748	0.714122	0.121943	0.995103	33	0.4919
SDD	108086	7	1132100	C	T	GPER1	NP_001035055.1	ENSP00000380281	R246W	FALSE	0.061	-3.1745	-3.318	-3.031	2.30682	-4.57158	0.078	1.15	0.123	0.077	0.652247	-0.185337	0.0943027	10.8	0.1422
SDD	108107	16	422246	G	A	PGAP6	NP_067082.2	ENSP00000401338	T686I	FALSE	0.164412	-3.134	-3.025	-3.243	7.338	-3.7741	0.011	0.94	0.231	0.16	0.380377	-0.130302	0.845054	24.2	0.2142
SDD	108113	17	80019781	C	T	DUS1L	NP_071439.3	ENSP00000303515	V197M	FALSE	0.001	-3.466	-3.426	-3.506	8.34943	-10.0523	0.001	1	0.858	0.399	0.733374	0.150108	0.989308	24.4	0.7775
SDD	108116	3	50390690	G	A	CYB561D2	NP_001278213.1	ENSP00000400454	E62K	FALSE	0.01	-3.842	-4.182	-3.502	7.18994	-9.23152	0	0.68	0.82	0.629	0.749325	0.314141	0.985161	31	0.8681
SDD	10812	11	76916608	G	A	MYO7A	NP_000251.3	ENSP00000386331	R1861Q	TRUE	0.720841	-3.19	-3.108	-3.272	4.699	0.116726	0.024	-3	0.615	0.562	0.595426	-0.0229277	0.588433	25.9	0.2675
SDD	10812	5	90670951	G	C	ARRDC3	NP_065852.1	ENSP00000265138	R220G	TRUE	0.003	-4.5055	-4.506	-4.505	11.6159	-8.51819	0.001	2.23	0.977	0.407	0.790043	0.232893	0.997644	27.6	0.9698
SDD	108142	11	111594743	G	T	SIK2	NP_056006.1	ENSP00000305976	A891S	FALSE	0.954825	-2.984	-3.037	-2.931	2.598	-0.286774	0.362	-0.72	0.033	0.122	0.323594	-0.243535	0.0428899	5.139	0.0717
SDD	108157	5	52374610	A	G	ITGA2	NP_002194.2	ENSP00000296585	N945S	FALSE	0.203	-2.985	-3.125	-2.845	0.594727	0.23024	1	0.82	0.205	0.096	0.335267	-0.352185	0.230714	17.73	0.0653
SDD	108174	8	22428444	C	T	SORBS3	NP_005766.3	ENSP00000240123	R485C	FALSE	0.003	-3.469	-3.306	-3.632	11.1184	-9.473	0	0.77	0.934	0.402	0.527471	0.101366	0.97595	27.2	0.6596
SDD	108224	10	101448504	G	A	ENTPD7	NP_065087.1	ENSP00000359520	D236N	FALSE	0.258539	-3.223	-3.222	-3.224	3.045	-2.01993	0.474	2.87	0.285	0.072	0.659896	-0.299578	0.769006	22.9	0.0824
SDD	108224	16	31088199	A	T	ZNF646	NP_055514.3	ENSP00000300850	D185V	FALSE	0.01	-2.873	-3.041	-2.705	-0.227783	-0.132926	0.629	3.04	0.192	0.014	0.347453	-0.325527	0.0693308	15.74	0.1214
SDD	108224	1	201016300	C	G	CACNA1S	NP_000060.2	ENSP00000355192	M1537I	FALSE	0.138	-3.12	-3.077	-3.163	2.75073	-1.75412	0.021	-0.03	0.137	0.196	0.630769	-0.0368236	0.918158	22.7	0.3213
SDD	108229	19	11130286	G	A	SMARCA4	NP_001122317.1	ENSP00000496635	R842Q	TRUE	0.001	-3.985	-3.977	-3.993	6.2417	-4.233					0.736841	0.240262	0.981249	32	0.97
SDD	108229	19	2278590	A	G	PEAK3	NP_940934.1	ENSP00000345102	V202A	TRUE	0.023	-2.2275	-2.837	-1.618	-5.13916	0.372947	1	2.81	0.159	0.03		-0.302797	0.0211964	8.262	0.0888
SDD	10823	9	97355963	G	A	FBP2	NP_003828.2	ENSP00000364486	R16C	FALSE	0.26	-3.536	-3.419	-3.653	10.3964	-6.20388	0	-0.77	0.909	0.818	0.859986	0.218241	0.992057	32	0.8322
SDD	10823	X	153556244	G	A	TKTL1	NP_036385.3	ENSP00000358931	V520I	FALSE	0.501	-2.412	-2.459	-2.365	-4.0564	0.940303	1	-2.71	0.13	0.23	0.365267	-0.310101	0.00604794	0.286	0.0604
SDD	108253	21	32526632	A	T	TIAM1	NP_003244.2	ENSP00000286827	L1035H	FALSE	0.075	-3.793	-3.604	-3.982	9.5249	-4.00737	0	0.58	0.752	0.51	0.755142	0.292805	0.996679	26.7	0.9049
SDD	10825	11	71183530	A	G	NADSYN1	NP_060631.2	ENSP00000326424	Q148R	TRUE	0.155	-2.9775	-2.895	-3.06	2.31238	-0.733376	0.473	2.53	0.437	0.236	0.456265	-0.139942	0.240419	17.47	0.0569
SDD	108269	2	220439811	A	G	INHA	NP_002182.1	ENSP00000243786	R222G	FALSE	0.01	-3.154	-3.013	-3.295	2.97278	-0.266713	0.05	-2.07	0.079	0.103	0.424168	-0.138962	0.102724	14.64	0.09
SDD	108272	8	125463375	G	C	TRMT12	NP_060426.2	ENSP00000329858	Q69H	FALSE	0.466	-3.28	-3.293	-3.267	3.74506	-1.0351	0.554	0.9	0.083	0.066	0.248713	-0.286729	0.0657675	12.87	0.1212
SDD	10828	9	98211545	C	A	PTCH1	NP_000255.2	ENSP00000332353	V1204L	TRUE	0.295	-2.932	-3.029	-2.835	1.06982	-0.0606702	0.581	-2.58	0.215	0.079	0.419496	-0.0566115	0.0479335	9.324	0.1461
SDD	108302	19	56319286	T	G	NLRP11	NP_659444.2	ENSP00000466285	N646H	FALSE	0.429	-3.055		-3.055	2.36743			0.58	0.17		0.364617	-0.356612	0.146754	1.244	0.2145
SDD	108310	5	38960540	A	G	RICTOR	NP_001272368.1	ENSP00000296782	V604A	FALSE	0.0288104	-3.254	-3.442	-3.066	2.139	0.425882	0.551	0.72	0.795	0.322	0.816719	0.0823189	0.650129	24.4	0.287
SDD	108316	8	23186032	C	T	LOXL2	NP_002309.1	ENSP00000373783	R338H	FALSE	0.015	-3.4475	-3.551	-3.344	7.54773	-8.57606	0.001	1.26	0.933	0.736	0.653496	0.193002	0.997148	29.3	0.9287
SDD	108355	7	37916583	G	C	NME8	NP_057700.3	ENSP00000199447	R323P	FALSE	-1	-3.659	-3.75	-3.568	5.74512	-4.72289	0.004	0.45	0.576	0.42	0.434557	-0.0112435	0.955345	25.1	0.7536
SDD	108365	11	71734179	G	C	NUMA1	NP_006176.2	ENSP00000377298	P75A	FALSE	0.297	-2.918	-2.99	-2.846	-0.00683594	0.0967444	0.14	1.13	0.267	0.074	0.322436	-0.101126	0.633214	21.5	0.0726
SDD	108365	X	153215694	C	T	HCFC1	NP_005325.2	ENSP00000309555	E2002K	FALSE	0.728	-4.539	-4.539			-4.85611	0.007	3.73	0.549	0.362	0.728325	0.0344788	0.96361	33	0.941
SDD	108381	1	108697753	T	G	SLC25A24	NP_037518.3	ENSP00000457733	H225P	TRUE	0.008	-3.7355	-4.013	-3.458	6.02209	-9.23161	0.004	-1.17	0.763		0.644	0.299005	0.996988	26.1	0.6359
SDD	108404	19	47197356	G	T	PRKD2	NP_001073349.1	ENSP00000393978	S451Y	TRUE	-1	-3.453	-3.382	-3.524	2.75671	-3.65532	0.147	-0.95	0.252	0.171	0.368649	-0.088611	0.825643	17.74	0.1276
SDD	108404	19	54692171	C	A	MBOAT7	NP_001139554.1	ENSP00000375634	A36S	TRUE	0.193	-2.9785	-2.986	-2.971	3.87811	-2.57823	0.222	1.44	0.428	0.064	0.613808	-0.129775	0.973188	21	0.1924
SDD	108404	2	216300390	T	C	FN1	NP_001293061.2	ENSP00000394423	S46G	TRUE	0.151	-3.437	-3.193	-3.681	4.21387	-0.815727	0.044	0.76	0.13	0.044	0.424018	-0.21303	0.22426	19.43	0.0675
SDD	108410	7	930622	G	A	GET4	NP_057033.2	ENSP00000265857	C175Y	FALSE	0	-3.1505	-3.468	-2.833	3.23785	-6.67161	0.078		0.928	0.701	0.77954	0.409588	0.992902	25.7	0.8781
SDD	108441	10	43617416	T	C	RET	NP_066124.1	ENSP00000347942	M918T	TRUE	0.096	-4.3405	-4.938	-3.743	7.612	-8.65682	0	-2.68	0.99	0.91	0.922185	0.456068	0.997526	26.9	0.968
SDD	108489	4	84502964	A	G	GPAT3	NP_001243350.1	ENSP00000378651	Y153C	FALSE	0.122	-3.407	-3.138	-3.676	11.3748	-6.31027	0	0.62	0.917	0.652	0.668436	0.300537	0.996116	28.2	0.807
SDD	108500	1	3624203	G	A	TP73	NP_005418.1	ENSP00000367545	V93M	TRUE	0.085	-3.0595	-2.821	-3.298	3.76331	-3.06072	0.013	-6.05	0.605	0.698	0.726331	0.141639	0.385566	24.7	0.126
SDD	108500	3	183503938	T	C	YEATS2	NP_060493.3	ENSP00000306983	L921P	TRUE	0.0828729	-3.4175	-3.596	-3.239	4.326	-1.67302	0.004	1.76	0.897	0.188	0.622378	0.127019	0.558576	25	0.2383
SDD	108500	3	53842721	G	C	CACNA1D	NP_000711.1	ENSP00000288139	S1952T	TRUE	0.549	-3.288	-3.288		4.09351	-1.05354	0.098	-0.01	0.459	0.123	0.469653	-0.0537746	0.852053	21.6	0.0886
SDD	108511	19	50827014	G	A	KCNC3	NP_004968.2	ENSP00000434241	S399L	TRUE	0	-3.7165	-3.928	-3.505	3.94568	-11.2356	0.065	-5.03	0.767	0.701	0.834643	0.202069	0.978909	23.4	0.8923
SDD	108523	6	155561743	A	G	TIAM2	NP_001010927.2	ENSP00000275246	Q8R	FALSE	0.367	-3.061	-2.991	-3.131	1.51489	0.175406	0.537	3.19	0.108	0.032	0.317416	-0.32786	0.135044	11.09	0.0607
SDD	108528	11	46765799	G	C	CKAP5	NP_001008938.1	ENSP00000432768	P1958R	FALSE	0.489	-3.432	-3.432		3.81836	-0.64583	0.002	0.91	0.227	0.21	0.52828	-0.145882	0.261271	24.1	0.2
SDD	108528	13	51854662	C	T	FAM124A	NP_659456.3	ENSP00000280057	P340L	FALSE	0.046	-3.182	-3.199	-3.165	1.05908	-0.444629	0.008	0.69	0.062	0.065	0.260572	-0.264629	0.516449	9.09	0.0651
SDD	108534	12	48272839	C	T	VDR	NP_001017535.1	ENSP00000449573	V20M	TRUE	0.187	-3.2015	-3.028	-3.375	3.82776	-2.5399	0.142	-3.32	0.258	0.304	0.765983	-0.106606	0.084181	19.18	0.1809
SDD	108534	17	47696428	C	A	SPOP	NP_001007227.1	ENSP00000377001	G132V	TRUE	0.062	-5.8315	-6.569	-5.094	7.30386	-12.2934	0.001	-1.13	0.935	0.902	0.843542	0.431544	0.99973	27.6	0.9996
SDD	108554	1	151751442	C	T	TDRKH	NP_001077432.1	ENSP00000395718	R201Q	FALSE	0.036	-3.441	-3.544	-3.338	2.4252	-4.81863	0.306	0.51	0.37	0.114	0.641363	-0.0464401	0.665857	22.8	0.1384
SDD	108565	1	2337978	G	A	PEX10	NP_722540.1	ENSP00000288774	T306M	TRUE	0.132	-3.603	-3.55	-3.656	8.63709	-4.80572	0	-1.94	0.815	0.85	0.661952	0.289618	0.970573	27.7	0.3311
SDD	108565	3	63898393	C	A	ATXN7	NP_000324.1	ENSP00000295900	P40Q	TRUE	0.945	-2.4885	-2.428	-2.549	1.06384	0.492143	0.536	2.5	0.304	0.049	0.819405	-0.226861	0.0242514	10.43	0.039
SDD	108640	9	134073928	C	T	NUP214	NP_005076.3	ENSP00000352400	P1683S	TRUE	0.391	-3.015	-3.015		1.99414	0.302991	0.386	1.75	0.051	0.063	0.366417	-0.229755	0.18024	12.64	0.0686
SDD	108656	6	168708422	G	A	DACT2	NP_999627.2	ENSP00000355760	P672L	FALSE	0.08	-2.957	-2.935	-2.979	2.43237	0.0433964	0.005	0.99	0.085	0.227	0.441889	-0.456837	0.240654	19.25	0.0746
SDD	108663	4	158242654	T	G	GRIA2	NP_001077088.2	ENSP00000264426	I262R	TRUE	0.163	-4.5105	-4.746	-4.275	5.68079	-11.1263	0	-1.85	0.87	0.931	0.876613	0.396541	0.998314	25.5	0.9918
SDD	108666	19	605124	A	C	HCN2	NP_001185.3	ENSP00000251287	M374L	FALSE	0.018	-3.151	-3.013	-3.289	5.63281	-8.41847	0.115	-4.67	0.769	0.694	0.868423	0.274082	0.727266	24.4	0.8667
SDD	108666	6	43333082	G	A	ZNF318	NP_055160.2	ENSP00000354964	R166W	FALSE	0.516579	-3.7055	-3.672	-3.739	8.008	-3.07352	0	3.61	0.279	0.139	0.358018	0.00689728	0.941533	24.5	0.1739
SDD	108689	21	33671358	G	A	MRAP	NP_848932.1	ENSP00000382684	V26M	FALSE	0.046	-3.5035	-3.335	-3.672	7.35657	-1.54541	0.001	-2.85	0.559	0.481	0.560093	0.117165	0.738251	25.9	0.5288
SDD	108689	9	140395252	C	T	PNPLA7	NP_001092007.2	ENSP00000384610	G550R	FALSE	0.195173	-3.3425	-3.422	-3.263	7.449	-5.83124	0.027	-4.19	0.825	0.929	0.556763	0.342931	0.896979	23.7	0.9755
SDD	108706	7	77035393	G	A	GSAP	NP_059135.2	ENSP00000257626	H47Y	FALSE	0.190476	-3.2875	-3.611	-2.964	2.484	-1.79321	0.306	2.3	0.092	0.047	0.515475	-0.259689	0.0881518	15.13	0.0772
SDD	108720	1	63119722	C	G	DOCK7	NP_001258928.1	ENSP00000413583	D85H	TRUE	0.342	-3.951	-3.935	-3.967	6.96631	-1.36093	0.005	1.41	0.937		0.685329	0.246724	0.995775	26.5
SDD	10873	17	48275137	C	A	COL1A1	NP_000079.2	ENSP00000225964	G218C	TRUE	-1	-5.1545	-5.98	-4.329	7.71655	-12.2999	0.001	-6.01	0.992	0.991	0.918472	0.574996	0.999388	29.6	0.9879
SDD	108804	12	57389283	T	C	GPR182	NP_009195.1	ENSP00000300098	I97T	FALSE	0.012	-3.1975	-3.158	-3.237	6.85419	-3.09	0.002	0.98	0.417	0.206	0.429212	-0.0633943	0.965794	22.2	0.2059
SDD	108810	1	8073418	G	A	ERRFI1	NP_061821.1	ENSP00000366702	A414V	FALSE	0.077	-3.392	-3.359	-3.425	5.74341	-0.310977	0.047	2.19	0.061	0.043	0.376885	-0.207298	0.51809	20.7	0.1066
SDD	108810	4	7802369	C	T	AFAP1	NP_001128119.1	ENSP00000410689	V356M	FALSE	0.002	-3.4705	-3.435	-3.506	8.23279	-7.30645	0.022	2.66	0.88	0.481	0.865108	0.00909121	0.887741	26.3	0.5084
SDD	108823	20	14307499	G	T	FLRT3	NP_938205.1	ENSP00000339912	D218E	FALSE	0.027	-3.197	-3.179	-3.215	1.71445	-0.40834	0.594	0.43	0.06	0.081	0.568226	-0.247303	0.0974048	14.98	0.0871
SDD	108829	6	100062015	C	T	PRDM13	NP_067633.2	ENSP00000358217	P502S	TRUE	0.06	-3.0205	-2.803	-3.238	3.72046	-0.570686	0.002	1.74	0.104	0.081	0.681141	-0.279371	0.452677	20.4	0.1033
SDD	108829	8	57353897	T	G	PENK	NP_001129162.1	ENSP00000400894	E246D	TRUE	0.077	-2.619	-3.026	-2.212	-1.77325	-0.592237	0.981	2.29	0.112	0.11	0.449583	-0.250805	0.0953037	13.2	0.0866
SDD	108961	8	22476765	C	T	CCAR2	NP_066997.3	ENSP00000373930	A875V	FALSE	0.787	-3.296	-3.404	-3.188	2.5144	-1.11912	0.599	8.37	0.352	0.209	0.457204	-0.0370533	0.315721	14.36	0.0958
SDD	108961	X	153296791	C	A	MECP2	NP_001104262.1	ENSP00000395535	G175V	FALSE	0	-4.0455	-4.152	-3.939	7.4563	-8.68762	0.019	-3.77	0.825	0.735	0.80239	0.4281	0.992114	25.5	0.9971
SDD	10900	11	66050533	G	A	CNIH2	NP_872359.1	ENSP00000310003	G76S	FALSE	0.002	-3.1875	-2.679	-3.696	1.38742	-0.354095	0.373	0.96	0.417	0.038	0.813555	-0.155864	0.364989	22.7	0.1437
SDD	109041	20	62891607	A	G	PCMTD2	NP_060727.2	ENSP00000307854	M97V	TRUE	0.099	-3.35	-3.35	-3.35	6.22711	-6.10537	0.234	1.42	0.839	0.282	0.736355	0.185543	0.820016	21.8	0.2963
SDD	109041	3	11059568	C	T	SLC6A1	NP_003033.3	ENSP00000287766	A93V	TRUE	0.103	-3.4875	-3.166	-3.809	4.64081	-1.82581	0.019	-0.71	0.636	0.611	0.85857	0.172686	0.977591	26.3	0.8598
SDD	109048	1	245023761	T	C	HNRNPU	NP_114032.2	ENSP00000491215	H298R	TRUE	0.04	-4.7685	-4.666	-4.871	11.0366	-9.86045					0.868991	0.381243	0.948397	29.7	0.9989
SDD	109048	3	48716312	C	G	NCKIPSD	NP_057537.1	ENSP00000294129	G597A	TRUE	0.062	-3.292	-3.364	-3.22	2.92236	-4.00883	0.427	1.09	0.423	0.141	0.731842	-0.197009	0.626984	23.2	0.3279
SDD	109054	X	19371223	G	A	PDHA1	NP_000275.1	ENSP00000394382	G148R	FALSE	0.018	-5.893	-5.538	-6.248	10.9799	-10.1234	0.001	-4.07	0.916	0.943	0.880069	0.736969	0.999784	29	0.9991
SDD	109072	9	111812951	C	T	TMEM245	NP_114401.2	ENSP00000363714	V626I	FALSE	0.077	-3.0485	-2.807	-3.29	6.13745	-4.97818	0.74	1.02	0.54	0.206	0.596205	-0.278904	0.281002	22	0.1098
SDD	109079	15	41191372	C	T	VPS18	NP_065908.1	ENSP00000220509	T119M	TRUE	0.0832084	-3.024	-3.016	-3.032	4.537	-1.78908	0.134	0.94	0.323	0.04	0.504728	-0.269589	0.253416	19.42	0.0902
SDD	109079	1	23763490	A	C	ASAP3	NP_060177.2	ENSP00000338769	C464G	TRUE	0	-4.608	-5.307	-3.909	9.974	-12.7888	0.002	-3.87	0.963	0.97	0.841533	0.564463	0.999933	32	0.9546
SDD	109079	6	31636321	G	A	CSNK2B	NP_001311.3	ENSP00000365042	E61K	TRUE	0.026	-4.0035	-3.982	-4.025	4.4782	-6.07922	0.297		0.587	0.223	0.862451	0.177825	0.865367	25.9	0.8578
SDD	10907	12	32884296	C	T	DNM1L	NP_036192.2	ENSP00000450399	R403C	TRUE	0.017	-4.4085	-4.225	-4.592	8.39728	-10.6949	0	-0.88	0.784	0.816	0.912112	0.396206	0.999645	33	0.9845
SDD	109103	1	154207113	A	T	UBAP2L	NP_055662.3	ENSP00000389445	K109M	FALSE	0.373	-4.2555	-4.254	-4.257	8.66748	-3.93732	0.002	1.38	0.616	0.33	0.76897	0.0161013	0.973434	29.1	0.7826
SDD	109103	7	1027917	C	T	CYP2W1	NP_060251.2	ENSP00000310149	T383M	FALSE	0.0366648	-3.1165	-3.166	-3.067	5.972	-5.2153	0.001	-1.73	0.732	0.669	0.440101	0.233888	0.997315	23.6	0.209
SDD	109108	20	31238251	G	A	C20orf203	NP_872390.2	ENSP00000495424	R190W	FALSE	0.277778	-3.224	-3.396	-3.052	1.223	-1.43995								24.7
SDD	109127	16	4945328	C	A	PPL	NP_002696.4	ENSP00000340510	K392N	TRUE	0.193	-2.969	-2.748	-3.19	4.42041	-0.403249	0.112	-0.47	0.395	0.183	0.649111	-0.148856	0.77103	23.4	0.4363
SDD	109127	18	52896116	G	A	TCF4	NP_001077431.1	ENSP00000346440	A614V	TRUE	0.067	-5.238	-5.378	-5.098	13.6675	-13.6972	0.001	-5.97	0.978	0.959	0.897299	0.582913	0.999649	31	0.9983
SDD	109127	1	156262935	A	G	GLMP	NP_653181.1	ENSP00000354553	M374T	TRUE	0.144	-3.476	-3.698	-3.254	5.40057	-2.64757	0.004	1.94	0.59	0.258		0.140958	0.923816	24.8	0.2926
SDD	109140	1	26162164	G	C	AUNIP	NP_001274419.1	ENSP00000443647	L132V	FALSE	0.01	-3.66	-3.593	-3.727	5.76929	-0.575662	0.115	0.67	0.143	0.02	0.228443	-0.258261	0.380528	19.3	0.0928
SDD	10916	5	161322749	G	A	GABRA1	NP_000797.2	ENSP00000023897	A312T	TRUE	0.052	-5.068	-4.968	-5.168	8.04129	-10.4196	0.003	-2.42	0.95	0.901	0.919389	0.46054	0.998426	28.7	0.9866
SDD	109172	11	77790780	C	A	NDUFC2-KCTD14	NP_001190190.1	ENSP00000432614	R4L	FALSE	0.813	-3.292	-3.312	-3.272	5.70749	-0.54931	0	0.77	0.687	0.275	0.488884	-0.0126902	0.867905	25.6	0.256
SDD	109172	11	77790780	C	A	NDUFC2	NP_004540.1	ENSP00000281031	R4L	FALSE	0.878	-3.476	-3.396	-3.556	7.22922	-0.487467	0	0.77	0.535	0.275	0.488884	-0.0126902	0.867905	25.6	0.256
SDD	109188	2	27430250	G	A	SLC5A6	NP_066918.2	ENSP00000310208	S90L	TRUE	0.0786483	-3.634	-3.953	-3.315	4.68	-9.00494	0.002	-2.35	0.608	0.532	0.434636	0.219236	0.927094	26.2	0.2789
SDD	10919	19	55610388	G	C	PPP1R12C	NP_060077.1	ENSP00000263433	H269Q	FALSE	0	-3.644	-3.506	-3.782	12.1276	-6.31133	0.001	0.01	0.645	0.379	0.880705	0.118403	0.996592	25.1	0.9647
SDD	109208	1	196461427	C	T	KCNT2	NP_940905.2	ENSP00000294725	R47K	TRUE	0.203	-3.624	-3.55	-3.698	4.01025	-1.10447	0.12	2.09	0.584	0.146	0.873915	0.0117719	0.955236	23.7	0.6585
SDD	109226	12	110231338	A	C	TRPV4	NP_067638.3	ENSP00000261740	L551R	TRUE	0.045	-4.1165	-4.54	-3.693	6.16254	-10.7756	0.001	-4.98	0.99	0.969	0.875641	0.53951	0.998033	27.9	0.8104
SDD	109226	6	17600779	C	A	FAM8A1	NP_057339.1	ENSP00000259963	P47T	TRUE	0.848	-3.1465	-3.092	-3.201	5.20831	-2.00964	0.024		0.147	0.022	0.806148	-0.112306	0.0806368	15.48	0.08
SDD	10922	5	34919985	C	A	BRIX1	NP_060791.3	ENSP00000338862	N104K	FALSE	0.027	-3.749	-3.879	-3.619	6.11157	-7.71531	0.019	1.97	0.786	0.258	0.733667	-0.118847	0.98626	18.47	0.9857
SDD	109232	11	67262615	G	A	PITPNM1	NP_004901.2	ENSP00000348772	T855M	TRUE	0.314	-3.378	-3.439	-3.317	2.60449	-2.99317	0.001	0.94	0.636	0.249	0.588657	-0.029896	0.925307	29.4	0.2398
SDD	109232	11	684943	G	T	DEAF1	NP_066288.2	ENSP00000371846	H275Q	TRUE	0.014	-3.907	-3.98	-3.834	7.50739	-8.52449	0.005	-0.09	0.899	0.424	0.811685	0.164795	0.993851	14.1	0.9997
SDD	109238	3	47446188	G	C	PTPN23	NP_056281.1	ENSP00000265562	R69P	FALSE	0.129	-3.9735	-4.16	-3.787	7.60107	-4.07191	0.007	2.26	0.89	0.36	0.786156	0.0834098	0.985444	32	0.9987
SDD	109241	3	63975982	G	A	ATXN7	NP_000324.1	ENSP00000295900	D498N	FALSE	0.002	-3.4495	-3.286	-3.613	6.94299	-3.73203	0.016	0.79	0.386	0.246	0.540959	-0.330872	0.648296	29.2	0.2421
SDD	109241	9	140008819	C	T	DPP7	NP_037511.2	ENSP00000360635	R66Q	FALSE	0.084	-2.6685	-2.708	-2.629	4.62256	-1.33372	0.1	2.62	0.212	0.013	0.406643	-0.316334	0.0748001	3.131	0.0978
SDD	109244	3	100963110	T	C	IMPG2	NP_057331.2	ENSP00000193391	I689V	FALSE	0.009	-2.9835	-3.132	-2.835	2.16101	0.590338	0.097	1.67	0.031	0.028	0.26135	-0.386347	0.0756833	0.002	0.0679
SDD	109244	3	98251117	C	A	GPR15	NP_005281.1	ENSP00000284311	F80L	FALSE	0.017	-2.787	-2.692	-2.882	2.57617	1.89916	0.966	1.72	0.15	0.095	0.569214	-0.27254	0.407407	6.796	0.5937
SDD	109244	X	15543427	G	A	BMX	NP_001712.1	ENSP00000340082	D257N	FALSE	0.194	-3.387	-3.297	-3.477	0.307007	0.354071	0.22	-0.96	0.164	0.14	0.418571	-0.337161	0.255962	19.78	0.0689
SDD	109273	X	53432320	C	T	SMC1A	NP_006297.2	ENSP00000323421	V639M	FALSE	0.005	-5.3025	-5.051	-5.554	9.06812	-3.96999	0.003	-3.04	0.767	0.913	0.863814	0.60514	0.987	25.2	0.9945
SDD	109276	2	232003526	A	G	PSMD1	NP_002798.2	ENSP00000309474	M654V	FALSE	0.0881935	-3.715	-3.685	-3.745	7.369	-8.64549	0.045	2.32	0.67	0.225	0.789171	-0.0474096	0.377271	22.7	0.1591
SDD	10927	10	89312185	A	G	MINPP1	NP_004888.2	ENSP00000361064	S472G	FALSE	0.164	-3.0015	-2.74	-3.263	3.74384	-1.1405	0.162	-1.01	0.144	0.073	0.25862	-0.134452	0.0633015	17.85	0.0611
SDD	10928	4	47644034	A	G	CORIN	NP_006578.2	ENSP00000273857	F701L	FALSE	0.04	-2.946	-2.995	-2.897	-1.17676	0.304233	1	-2.53	0.303	0.16	0.463249	-0.121655	0.046529	14.55	0.4853
SDD	109299	17	17124911	C	T	FLCN	NP_659434.2	ENSP00000285071	E271K	FALSE	0.013	-3.5845	-3.344	-3.825	9.29303	-0.723859	0	-3.68	0.948	0.613	0.85691	0.508628	0.985235	26.8	0.9837
SDD	109302	11	1009732	C	T	AP2A2	NP_001229766.1	ENSP00000327694	A887V	FALSE	0.51	-2.6785	-2.637	-2.72	1.20825	-2.38476	0.163	2.24	0.337	0.095	0.737379	-0.172816	0.263077	18.82	0.136
SDD	109302	2	44079752	G	A	ABCG8	NP_071882.1	ENSP00000272286	D237N	FALSE	0.009	-3.3175	-3.424	-3.211	7.27173	-7.2158	0.011	-6.42	0.951	0.913	0.795995	0.0763371	0.96724	32	0.2167
SDD	109308	19	33072190	C	G	PDCD5	NP_004699.1	ENSP00000466214	A8G	FALSE	0.279	-3.647	-3.645	-3.649	6.26015	-6.05809			0.376		0.74441	0.00841493	0.987437	24.8	0.2143
SDD	109311	12	52408864	G	A	TAMALIN	NP_859062.1	ENSP00000293662	E357K	FALSE	0.121	-2.6945	-2.9	-2.489	-0.415527	-1.55124	0.628	0.51	0.162	0.13	0.953951	-0.103863	0.527369	22.9	0.5236
SDD	109311	1	151810907	C	T	C2CD4D	NP_001129475.1	ENSP00000389554	A187T	FALSE	0.018	-2.979	-2.945	-3.013	4.30225	-1.56251	0.415	1.8	0.072	0.02	0.726027	-0.337816	0.0651222	9.024	0.0787
SDD	109316	19	35837508	G	A	CD22	NP_001762.2	ENSP00000085219	E818K	FALSE	-1	-3.27	-3.27			-2.665	0.007	0.69	0.293	0.396	0.432347	0.0186062	0.760617	26.8	0.1008
SDD	109320	16	28898753	A	G	ATP2A1	NP_775293.1	ENSP00000349595	N213S	FALSE	0.043	-3.119	-3.015	-3.223	6.59241	-2.6297	0.138	-2.65	0.892	0.406	0.68964	-0.0278592	0.824256	22.1	0.1448
SDD	109326	16	19191811	C	T	SYT17	NP_057608.2	ENSP00000347538	S94L	FALSE	0.739	-3.1855	-2.922	-3.449	6.49731	-1.0595	0.014	2.11	0.355	0.158	0.540919	0.0183695	0.661342	25.5	0.095
SDD	109341	1	227174271	G	A	COQ8A	NP_064632.2	ENSP00000355739	V593I	TRUE	0.033	-2.863	-2.939	-2.787	1.94485	-2.32556	0.277	-0.74	0.045	0.126	0.265578	-0.279874	0.0234764	0.892	0.0707
SDD	109342	12	13720098	C	G	GRIN2B	NP_000825.2	ENSP00000477455	G820A	TRUE	0.011	-5.909	-5.981	-5.837	9.36554	-8.79293			0.953		0.916842	0.479918	0.997553	24.8	0.9944
SDD	109351	8	61192281	G	A	CA8	NP_004047.3	ENSP00000314407	H87Y	TRUE	0.042	-3.466	-3.682	-3.25	2.20877	-3.23408	0	-0.42	0.893	0.748	0.814681	0.368244	0.99673	27.6	0.4128
SDD	109351	9	5954066	T	A	KIAA2026	NP_001017969.2	ENSP00000382815	T748S	TRUE	0.448	-2.606	-2.606		2.42676	0.711155	0.031		0.434	0.141	0.632914	-0.234566	0.280926	23.5	0.2541
SDD	109357	11	65425898	C	T	RELA	NP_068810.3	ENSP00000384273	R246Q	FALSE	0.001	-4.414	-4.73	-4.098	7.92151	-9.80274	0.001	0.44	0.496	0.482	0.881719	0.126311	0.997965	27.5	0.9989
SDD	109357	2	237032674	G	A	AGAP1	NP_055729.2	ENSP00000338378	D775N	FALSE	0.145	-2.672	-2.524	-2.82	2.07971	-2.8681	0.504	-0.45	0.425	0.243	0.565162	-0.251462	0.217799	24	0.1675
SDD	109361	17	73887219	C	T	TRIM65	NP_775818.2	ENSP00000269383	V399I	FALSE	0.103	-3.0705	-3.119	-3.022	4.40155	-2.75179	0	-1.25	0.169	0.43	0.368461	-0.150103	0.620639	15.56	0.085
SDD	109393	19	45766405	A	G	MARK4	NP_001186796.1	ENSP00000262891	N96S	FALSE	0.0869767	-3.1885	-3.095	-3.282	5.47	-5.86623	0.065	-0.11	0.271	0.385	0.792437	-0.118929	0.99133	28.2	0.2817
SDD	10941	17	66521074	A	G	PRKAR1A	NP_002725.1	ENSP00000464977	Y175C	TRUE	0.035	-4.8115	-4.762	-4.861	13.089	-11.3817		-3.92	0.909		0.87317	0.578711	0.999808	29.9	0.9691
SDD	109421	15	43571940	G	C	TGM7	NP_443187.1	ENSP00000389466	P521A	FALSE	0.755377	-3.001	-3.079	-2.923	3.512	-0.39883	0.759	-1.11	0.194	0.076	0.314314	-0.14353	0.0368376	1.328	0.0646
SDD	109425	6	132966452	G	C	TAAR1	NP_612200.1	ENSP00000275216	L231V	FALSE	0.592	-2.6285	-2.756	-2.501	-0.10321	-0.0993071	0.23	1.13	0.057	0.011	0.198516	-0.320777	0.0952104	0.264	0.0772
SDD	109429	19	38886778	C	G	SPRED3	NP_001035987.1	ENSP00000345405	A409G	FALSE	0.909	-3.2505	-2.88	-3.621	5.66492	-0.242896	0.018	-1.58	0.117	0.25	0.664939	-0.0681255	0.539215	25.1	0.099
SDD	109435	15	72454678	G	A	GRAMD2A	NP_001012660.1	ENSP00000311657	R333C	FALSE	0.451	-3.5115	-3.167	-3.856	8.75348	-7.29603	0	0.45	0.946	0.506	0.606078	0.0707973	0.822861	25.4	0.271
SDD	109435	18	29099832	G	A	DSG2	NP_001934.2	ENSP00000261590	A50T	FALSE	0.066	-3.2145	-3.213	-3.216	4.61035	-0.250872	0.024	0.3	0.14	0.042	0.377954	-0.300827	0.0881754	18.54	0.1234
SDD	109435	3	128813951	C	A	RAB43	NP_001191816.1	ENSP00000427632	R89L	FALSE	0.0168691	-3.6695	-3.63	-3.709	7.623	-8.68923	0	-1.59	0.958	0.884		-0.0949816	0.984134	27	0.9616
SDD	109435	3	128813951	C	A	ISY1-RAB43	NP_001191819.1	ENSP00000411822	A305S	FALSE	0.989757	-2.699	-3.099	-2.299	-5.486	0.287821	0.548		0.386	0.073	0.41306	-0.0949816	0.984134	27	0.9616
SDD	109435	7	44147504	C	T	AEBP1	NP_001120.3	ENSP00000223357	P279L	FALSE	0.693	-3.1125	-3.107	-3.118	2.39331	-2.63503	0.05	1.03	0.153	0.101	0.427275	-0.250686	0.0968479	15.76	0.0806
SDD	109440	14	105201372	G	A	ADSS1	NP_954634.1	ENSP00000333019	G113S	FALSE	0.036	-3.227	-3.157	-3.297	7.7511	-10.1928	0	-1.11	0.95	0.817	0.886705	0.382924	0.999484	28.2	0.9802
SDD	109443	12	52200884	C	T	SCN8A	NP_055006.1	ENSP00000346534	R1872W	TRUE	0.177	-4.5745	-4.552	-4.597	6.22363	-6.12663	0	-4	0.834	0.901	0.868561	0.487601	0.990807	24.6	0.9763
SDD	109443	4	2956257	C	T	NOP14	NP_001278907.1	ENSP00000405068	G169D	TRUE	0.173	-3.1555	-3.535	-2.776	5.05286	-7.19749	0.004	1.59	0.308	0.12	0.295129	-0.127849	0.525434	6.343	0.1
SDD	109464	15	42111101	G	A	MAPKBP1	NP_001122080.1	ENSP00000393099	R752Q	FALSE	0.001	-3.2025	-3.235	-3.17	1.04224	-0.0826595	0.294	1.3	0.212	0.074	0.29934	-0.283422	0.252289	17.78	0.0922
SDD	109464	2	219146759	A	G	TMBIM1	NP_001308357.1	ENSP00000258412	Y36H	FALSE	-1	-2.864	-2.864			-2.18083	0.175	1.98	0.475	0.182	0.719249	0.0896489	0.862959	23.4	0.5722
SDD	109464	7	86526926	C	A	ELAPOR2	NP_001136221.1	ENSP00000413445	D861Y	FALSE	0.120783	-4.3195	-4.465	-4.174	12.516	-10.2461	0.001	3.6	0.984	0.736	0.862391	0.241507	0.996944	29.5	0.9551
SDD	10948	20	62044824	C	T	KCNQ2	NP_742105.1	ENSP00000352035	R581Q	TRUE	0.022	-4.194	-4.002	-4.386	7.18018	-9.87948	0.015	-7.46	0.921	0.95	0.821921	0.550848	0.999024	31	0.9914
SDD	109493	22	40055003	G	A	CACNA1I	NP_066919.2	ENSP00000385019	V738M	FALSE	0.014	-3.976	-3.976		6.80542	-6.10971	0.001	-5.05	0.82	0.871	0.920494	0.4021	0.998579	28.6	0.9282
SDD	109531	18	43669637	C	T	ATP5F1A	NP_001001937.1	ENSP00000282050	R182Q	TRUE	0.029	-4.568	-4.381	-4.755	11.077	-12.2656	0.005	-1.87	0.543	0.878	0.862485	0.356764	0.980006	25.6	0.9988
SDD	109534	15	89876351	G	C	POLG	NP_002684.1	ENSP00000268124	A212G	TRUE	0.119	-3.263	-3.086	-3.44	8.35962	-0.57225	0	-3.29	0.827	0.919	0.755143	0.407725	0.999208	33	0.5065
SDD	109550	15	86312369	G	A	KLHL25	NP_071925.2	ENSP00000336800	R225W	FALSE	0.02	-3.567	-3.478	-3.656	10.099	-10.5536	0	-0.82	0.948	0.594	0.563087	0.191266	0.976695	25.2	0.9322
SDD	109553	19	17974030	C	A	RPL18A	NP_000971.1	ENSP00000222247	H163Q	FALSE	0.161	-3.033	-3.32	-2.746	6.60483	0.496344	0.301		0.624	0.171	0.821589	0.148093	0.78459	22.4	0.9093
SDD	109557	1	36354156	G	T	AGO1	NP_036331.1	ENSP00000362300	V52L	TRUE	0.168	-3.163	-3.156	-3.17	-0.684448	-2.84454	1	3.12	0.513	0.209	0.867523	-0.0181683	0.795822	19.37	0.7022
SDD	109577	14	93399008	C	T	CHGA	NP_001266.1	ENSP00000216492	R368W	FALSE	0.1	-2.8065	-3.148	-2.465	0.256042	-1.26203	0.001	4.74	0.196	0.14	0.384198	-0.372443	0.0980498	22.1	0.1227
SDD	109583	6	117201804	C	A	RFX6	NP_775831.2	ENSP00000332208	P160T	TRUE	0.147	-3.8395	-3.701	-3.978	7.73938	-6.38903	0.001	-2.12	0.842	0.936	0.889772	0.404653	0.997825	24.6	0.9285
SDD	109589	19	16000330	C	T	CYP4F2	NP_001073.3	ENSP00000221700	R274Q	FALSE	0.0727751	-3.3545	-3.435	-3.274	6.198	-8.29412	0.001	-0.74	0.283	0.257	0.463875	-0.114208	0.990588	23.1	0.2046
SDD	109589	21	42845259	C	A	TMPRSS2	NP_001128571.1	ENSP00000381588	V335L	FALSE	0.001	-3.2065	-3.206	-3.207	5.20502	-4.32739	0.008	0.12	0.34	0.185	0.537272	-0.0432395	0.700349	22.9	0.572
SDD	109589	X	107433696	T	C	COL4A6	NP_001838.2	ENSP00000361290	N452S	FALSE	0.45	-3.3145	-3.305	-3.324	0.989014	0.93127	0.979	-3.35	0.028	0.229	0.300972	-0.268937	0.0329741	0.034	0.0635
SDD	1095	13	42306289	T	C	VWA8	NP_001009814.1	ENSP00000281496	D810G	TRUE	0.086	-3.959	-3.959			-5.77992	0.006	1.56	0.958	0.547	0.811059	0.26049	0.996117	31	0.9928
SDD	1095	15	43696708	A	G	TUBGCP4	NP_001273343.1	ENSP00000260383	D650G	TRUE	0.201	-4.3115	-4.5	-4.123	8.91394	-8.11636	0.013	0.24	0.993	0.734	0.75384	0.344098	0.995236	29.9	0.9945
SDD	10961	17	44952553	G	C	WNT9B	NP_003387.1	ENSP00000290015	E141Q	FALSE	0.027	-3.0715	-2.928	-3.215	5.0293	-3.80067	0.006	-1.04	0.779	0.528	0.735762	0.202096	0.980194	27.1	0.2814
SDD	109630	18	55355534	A	G	ATP8B1	NP_005594.2	ENSP00000497896	Y476H	TRUE	0.02	-3.729	-3.732	-3.726	6.7514	-5.02556					0.723135	0.275101	0.993179	26.3	0.6521
SDD	109640	2	158443738	T	C	ACVR1C	NP_660302.2	ENSP00000243349	T89A	FALSE	0.362751	-3.419	-3.447	-3.391	5.151	-3.41249	0.525	0.43	0.668	0.47	0.782112	0.247136	0.900673	20.5	0.1115
SDD	109647	17	75201406	A	G	SEC14L1	NP_002994.4	ENSP00000390392	K383E	TRUE	0.021814	-3.106	-3.224	-2.988	4.524	-6.9223	0.375	1.87	0.268	0.097	0.781664	-0.219086	0.266066	21.7	0.2202
SDD	109647	1	165738102	C	T	TMCO1	NP_001243093.1	ENSP00000480514	V14I	TRUE	0.959481	-3.343	-3.57	-3.116	3.083	-1.0691			0.194		0.460161	-0.275513		17.59	0.1262
SDD	109647	2	101910525	T	C	RNF149	NP_775918.2	ENSP00000295317	K244R	TRUE	0.03826	-3.1565	-3.115	-3.198	5.446	-3.52035	0.003	2.87	0.511	0.107	0.458795	-0.335536	0.58016	28.6	0.0894
SDD	109653	11	17416760	G	A	ABCC8	NP_000343.2	ENSP00000374467	A1457V	FALSE	0.091	-3.3405	-3.204	-3.477	5.10645	-1.32706	0.002	-3.06	0.975	0.747	0.765658	0.436458	0.988175	25	0.9099
SDD	109657	6	31762739	C	T	VARS1	NP_006286.1	ENSP00000364815	G86S	FALSE	0.969	-3.293	-3.162	-3.424	5.31909	-1.20323	0.008	3.54	0.339	0.135	0.854234	-0.105872	0.63853	23.5	0.1445
SDD	109660	14	35477991	C	G	SRP54	NP_003127.1	ENSP00000216774	Q147E	TRUE	0.006	-6.1185	-6.69	-5.547	11.0316	-15.4929	0		0.847	0.918	0.843752	0.508427	0.999046	25.1	0.9838
SDD	109664	19	14262280	G	A	ADGRL1	NP_001008701.1	ENSP00000340688	A1277V	FALSE	0.905	-3.371	-3.11	-3.632	6.14209	-0.433561	0.036	-0.58	0.239	0.255	0.77148	-0.265377	0.187109	22.8	0.2142
SDD	109664	1	212150006	C	T	INTS7	NP_001186740.1	ENSP00000355960	S509N	FALSE	0.007	-3.179	-3.352	-3.006	1.79333	-0.553548	0.345	1.94	0.172	0.093	0.431674	-0.284153	0.39821	11.21	0.1532
SDD	109664	X	16189380	A	G	MAGEB17	NP_001264236.1	ENSP00000382884	K292R	FALSE	0.068	-3.597	-3.57	-3.624	3.4295	-1.80469	0.038	4.5	0.234	0.052	0.510522	-0.46077	0.234722	22.1	0.0986
SDD	10967	9	138660699	T	C	KCNT1	NP_065873.2	ENSP00000360822	W476R	TRUE	0.025	-4.0865	-4.434	-3.739	7.12231	-10.2121	0	-0.36	0.959	0.74	0.909343	0.404788	0.999766	29.6
SDD	109689	1	153653031	T	C	NPR1	NP_000897.3	ENSP00000357669	L259P	FALSE	0.262	-3.2735	-3.203	-3.344	4.2948	-2.44514	0.193	-1.68	0.283	0.349	0.499401	0.0257148	0.236655	18.43	0.4565
SDD	109701	2	219530928	T	C	RNF25	NP_071898.2	ENSP00000295704	N128S	FALSE	0.016	-3.1285	-2.993	-3.264	3.66962	0.7441	0.539	0.87	0.254	0.08	0.57995	-0.166679	0.554677	22.2	0.1494
SDD	10970	17	40947344	G	A	WNK4	NP_115763.2	ENSP00000246914	V969I	FALSE	0.506	-3.0375	-3.187	-2.888	0.67749	-1.74074	0.478	-0.55	0.049	0.112	0.407798	-0.51673	0.00715996	1.758	0.0746
SDD	109717	10	96602719	C	G	CYP2C19	NP_000760.1	ENSP00000360372	P363A	FALSE	0.0541913	-3.0705	-3.078	-3.063	6.045	-5.85654	0.002	2.34	0.74	0.306	0.472967	-0.0247012	0.994544	22.4	0.2843
SDD	109717	15	42292153	C	T	PLA2G4E	NP_001193599.1	ENSP00000382434	D300N	FALSE	0.31	-2.8005	-2.845	-2.756	3.26416	-0.596763	0.717	4.99	0.229	0.028	0.297645	-0.659388	0.0156299	6.042	0.0755
SDD	109738	20	55025713	A	C	CASS4	NP_001157588.1	ENSP00000353462	H207P	TRUE	0.139	-2.84	-2.681	-2.999	4.64368	1.77	0.208	2.64	0.155	0.026	0.244762	-0.250007	0.0449802	3.836	0.0685
SDD	109738	7	50566914	C	T	DDC	NP_001229817.2	ENSP00000395069	V192I	TRUE	0.002	-2.7585	-3.003	-2.514	-0.0170288	-1.99607	0.379	0.83	0.246	0.094	0.274993	-0.462665	0.0193677	7.903	0.0817
SDD	109751	8	145139714	G	A	GPAA1	NP_003792.1	ENSP00000347206	R367H	TRUE	0.013	-3.1515	-3.161	-3.142	3.77563	-3.09892	0.083		0.236	0.13	0.456323	-0.178699	0.802476	22.4	0.0749
SDD	10975	17	79880615	G	A	MAFG	NP_002350.1	ENSP00000350369	R119W	FALSE	0.167	-3.9625	-4.197	-3.728	6.69739	-11.1677	0.002	-1.84	0.842	0.632	0.873832	0.362028	0.808761	25.4	0.4193
SDD	10977	7	155530862	A	G	RBM33	NP_444271.2	ENSP00000384160	Q501R	FALSE	0.009	-3.563	-3.301	-3.825	6.75317	-0.608882	0.06	0.61	0.296	0.12	0.443196	-0.140232	0.516429	21.9	0.2154
SDD	109805	7	40085606	A	G	CDK13	NP_003709.3	ENSP00000181839	N842S	TRUE	0.001	-4.754	-5.307	-4.201	9.00244	-12.1771	0	-2.94	0.92	0.861	0.806506	0.226271	0.997291	26.7	0.9975
SDD	109821	1	1688625	T	G	NADK	NP_001185923.1	ENSP00000367890	M234L	FALSE	0.123	-3.24	-2.942	-3.538	6.1178	0.653678	0.615	1	0.261	0.066	0.466311	-0.197163	0.449442	21.1	0.1
SDD	109824	1	110134683	A	T	GNAI3	NP_006487.1	ENSP00000358867	E298V	TRUE	0.113	-3.736	-3.615	-3.857	7.96982	-6.23742	0	-2.49	0.859	0.895	0.741095	0.384998	0.997018	31	0.5092
SDD	10982	10	124740101	C	A	PSTK	NP_699167.2	ENSP00000357882	R36S	FALSE	0.25964	-3.462	-3.575	-3.349	6.165	-4.27087	0.006	0.72	0.428	0.256	0.671705	0.306963	0.946498	23.5	0.4004
SDD	109836	1	120056678	G	A	HSD3B1	NP_000853.1	ENSP00000358421	G178S	TRUE	0.0457766	-2.808	-2.89	-2.726	4.703	-3.91706	0.043	-2.28	0.112	0.461	0.34572	-0.349387	0.217528	23.3	0.0934
SDD	109836	3	123010214	C	T	ADCY5	NP_899200.1	ENSP00000419361	E1025K	TRUE	0.077	-4.02	-4.104	-3.936	8.08252	-6.66073	0	-1.34	0.797	0.743	0.903561	0.395685	0.999057	27.3	0.9992
SDD	109836	9	133759721	C	T	ABL1	NP_009297.2	ENSP00000361423	R701W	TRUE	0.189	-3.1525	-3.359	-2.946	2.97742	-1.77468	0.035	2.44	0.416	0.099	0.548815	-0.210549	0.671429	23.5	0.1102
SDD	109850	17	72341090	C	T	KIF19	NP_694941.2	ENSP00000374566	S258L	FALSE	0.0286406	-3.0765	-2.833	-3.32	7.12	-8.01028	0.004	-0.77	0.524	0.396	0.70289	0.0486598	0.970653	25.5	0.2395
SDD	109867	11	76895736	A	G	MYO7A	NP_000251.3	ENSP00000386331	N1160S	TRUE	0.230066	-3.028	-3.073	-2.983	2.554	0.435419	0.08	-2.87	0.781	0.448	0.730127	0.0426971	0.904526	24.3	0.5221
SDD	109867	7	12271530	G	A	TMEM106B	NP_060844.2	ENSP00000379901	D252N	TRUE	0.191	-3.489	-3.299	-3.679	6.68398	-3.31473	0.054	1.43	0.827	0.526	0.811816	-0.0372065	0.997816	31	0.968
SDD	109897	6	160234675	G	A	PNLDC1	NP_001258791.1	ENSP00000376007	E328K	FALSE	0.04	-3.0105	-2.966	-3.055	3.71582	0.2041	0.078	1.93	0.553	0.128	0.466044	-0.0733022	0.817084	24	0.124
SDD	109905	19	14583397	C	T	PTGER1	NP_000946.2	ENSP00000292513	R395Q	FALSE	0.941	-2.9035	-2.606	-3.201	4.03223	-0.63585	0.198	2.19	0.101	0.043	0.38532	-0.508957	0.152347	22	0.0864
SDD	109906	1	1737942	A	G	GNB1	NP_002065.1	ENSP00000367872	I80T	TRUE	0.743	-4.117	-4.15	-4.084	6.12372	-8.66714	0	0.22	0.963	0.515	0.926381	0.351782	0.999098	27.1	0.9988
SDD	10990	10	31750059	C	T	ZEB1	NP_110378.3	ENSP00000319248	A51V	TRUE	0.426	-3.274	-3.308	-3.24	3.03149	-0.168879	0.127	-0.95	0.241	0.182	0.54627	-0.00101191	0.346924	21.6	0.0952
SDD	10990	14	101350477	T	C	RTL1	NP_001128360.1	ENSP00000497482	I217V	TRUE	0.057	-3.033	-3.05	-3.016	3.08887	-0.3704					0.358829	-0.284539	0.0314438	9.088	0.1209
SDD	10990	15	44202089	T	A	FRMD5	NP_116281.2	ENSP00000403067	I140F	TRUE	0.01	-3.8145	-3.545	-4.084	7.2879	-8.52964	0.001	-1.15	0.805	0.754	0.879723	0.31495	0.97758	27.3	0.957
SDD	10990	21	37781703	G	A	CHAF1B	NP_005432.1	ENSP00000315700	A287T	TRUE	0.001	-3.507	-3.298	-3.716	6.18982	-4.45935	0.34	-0.19	0.467	0.209	0.680416	0.0742789	0.965202	27.2	0.3939
SDD	10990	21	46276172	G	C	PTTG1IP	NP_004330.1	ENSP00000328325	P129A	TRUE	0.065	-3.1435	-3.21	-3.077	4.29797	-4.53409	0.465	0.65	0.26	0.118	0.417047	-0.124822	0.731438	20.8	0.0848
SDD	10990	4	170634409	A	G	CLCN3	NP_776297.2	ENSP00000261514	K777E	TRUE	0.103985	-4.6465	-4.903	-4.39	6.552	-9.97765	0.001	-3.21	0.763	0.937	0.83797	0.451651	0.979981	24.7	0.9969
SDD	109929	2	241715306	C	T	KIF1A	NP_004312.2	ENSP00000497030	R307Q	TRUE	0.331	-5.5675	-5.582	-5.553	15.9636	-13.9973					0.875142	0.457499	0.998786	27	0.952
SDD	109936	11	14316397	C	T	RRAS2	NP_036382.2	ENSP00000256196	A70T	TRUE	0.024	-4.1405	-4.117	-4.164	8.75189	-11.7336	0.016	-2.42	0.794	0.863	0.829796	0.156618	0.963363	26.8	0.9981
control	10C102695	8	135614542	G	A	ZFAT	NP_065914.2	ENSP00000367069	R474C	TRUE	0.035	-3.643	-3.833	-3.453	4.09936	-3.76018	0.004	3.3	0.795	0.235	0.486125	0.0106213	0.671421	29.8	0.2943
control	10C105735	12	100453251	T	C	BLTP3B	NP_055869.1	ENSP00000279907	I602V	TRUE	0.004	-3.213	-3.187	-3.239	3.12964	0.266293	0.261	2.88	0.064	0.048	0.35477	-0.364995	0.128857	11.84	0.0724
control	10C105972	5	72419397	G	A	TMEM171	NP_001154814.1	ENSP00000287773	C66Y	TRUE	0.045	-3.894	-4.09	-3.698	7.30029	-6.86023	0.01	1.77	0.521	0.265	0.627526	0.0669698	0.935109	26.7	0.7194
control	10C106239	6	41889361	G	T	BYSL	NP_004044.3	ENSP00000230340	D21Y	TRUE	0.221	-3.3725	-3.501	-3.244	6.74316	-7.82628	0.005	1.93	0.273	0.163	0.615527	-0.0622804	0.993015	26.2	0.5137
control	10C106631	19	44932648	A	G	ZNF229	NP_055333.3	ENSP00000479884	C770R	TRUE	-1	-4.084	-4.084			-8.11463			0.582		0.750842	0.21845	0.981351	26	0.9556
control	10C107338	19	581474	G	A	BSG	NP_940991.1	ENSP00000343809	V202M	TRUE	0.01	-3.7465	-3.59	-3.903	12.5065	-7.39836	0	-1.24	0.84	0.715	0.615772	0.303707	0.996257	26	0.9342
control	10C107341	12	6974373	T	G	USP5	NP_001092006.1	ENSP00000229268	M815R	TRUE	0.119	-4.313	-4.531	-4.095	9.6261	-7.9683	0.019	-0.73	0.827	0.724	0.867679	0.349343	0.97706	29.5	0.9333
control	10C107341	21	44324297	A	G	NDUFV3	NP_066553.3	ENSP00000346196	H392R	TRUE	0.209	-2.625	-2.729	-2.521	-0.295105	1.0653	0.111		0.09	0.036	0.239608	-0.397781	0.175476	0.171
control	10C108337	2	166210904	C	T	SCN2A	NP_066287.2	ENSP00000283256	P1041L	TRUE	0.033	-3.269	-3.269		2.65356	0.880615	0.005	-1.75	0.267	0.444	0.6505	0.0566337	0.981459	23.2	0.2544
control	10C109390	3	170811668	C	T	TNIK	NP_001155033.1	ENSP00000349880	S865N	TRUE	0.056	-3.3445	-3.324	-3.365	3.87439	-1.259	0.152	-1.1	0.106	0.163	0.430852	-0.104107	0.559053	15.74	0.0909
control	10C109648	4	156289879	C	G	MAP9	NP_001034669.1	ENSP00000310593	E189D	TRUE	0.184	-3.3435	-3.253	-3.434	6.01935	-0.677576	0.057	1.97	0.11	0.068	0.318939	-0.223548	0.174475	9.692	0.1128
control	10C109816	X	117819700	A	T	DOCK11	NP_653259.3	ENSP00000276202	H2051L	FALSE	0.678266	-3.8015	-3.696	-3.907	7.258	0.538407	0.269	2.26	0.593	0.203	0.645275	-0.182973	0.971641	18.67	0.4029
control	10C111564	10	32576111	G	A	EPC1	NP_079485.1	ENSP00000263062	T356M	TRUE	0.119691	-3.3345	-3.315	-3.354	5.314	-2.52135	0.076	-0.19	0.277	0.149	0.36598	-0.252018	0.306679	23.7	0.078
control	10C111564	19	18956828	G	A	UPF1	NP_001284478.1	ENSP00000470142	D91N	TRUE	0.346	-3.3345	-3.522	-3.147	1.57379	-1.0691		-2.49	0.365		0.840943	-0.15257	0.591756	23.2	0.1196
control	10C111564	4	164272204	A	G	NPY5R	NP_001304020.1	ENSP00000423917	H260R	TRUE	0.049	-3.1835	-2.807	-3.56	4.98901	0.767735	0.039	-0.54	0.222	0.156	0.393095	-0.0503578	0.483531	20.6	0.0872
control	10C112343	3	123666090	C	T	CCDC14	NP_073594.5	ENSP00000312031	R213Q	TRUE	0.061	-3.2685	-3.001	-3.536	5.63416	0.573892	0.833	1.1	0.076	0.03	0.195196	-0.379751	0.0196247	2.072
control	10C112343	5	143853591	G	A	KCTD16	NP_065819.1	ENSP00000424151	D401N	TRUE	0.734	-3.546	-3.146	-3.946	7.82886	-1.77961	0.001	0.36	0.81	0.238	0.861597	-0.0217056	0.918649	27.8	0.5364
control	10C114379	20	45875234	T	C	ZMYND8	NP_001350643.1	ENSP00000439800	Y608C	TRUE	0.141646	-3.371	-3.412	-3.33	5.912	-1.32613	0.053	-1.86	0.92	0.558	0.846254	0.383536	0.883977	24.6	0.206
control	10C114380	12	130648360	C	G	FZD10	NP_009128.1	ENSP00000229030	D291E	TRUE	0.125201	-3.019	-2.999	-3.039	5.696	-1.30428	0.265	0.93	0.609	0.194	0.72071	-0.106212	0.931059	23.6	0.6647
control	10C116619	10	116045797	T	C	VWA2	NP_001258975.1	ENSP00000376708	V366A	TRUE	0	-2.8185	-2.55	-3.087	2.73413	-0.281353	0.185	-1.9	0.446	0.612	0.461683	0.0587612	0.955949	25	0.3583
control	10C117291	13	38138663	T	G	POSTN	NP_006466.2	ENSP00000369071	K822N	TRUE	0.918	-3.2395	-3.147	-3.332	2.16296	-0.583499	0.007	-2.82	0.2	0.308	0.396238	-0.0635503	0.662301	15.05	0.2385
control	10C117695	10	29813465	G	A	SVIL	NP_003165.2	ENSP00000364549	T415M	TRUE	0.466	-3.213	-3.313	-3.113	2.62939	-0.498465	0.414	0.83	0.054	0.053	0.234611	-0.504375	0.0267749	7.113	0.0528
SDD	110003	12	39967552	A	G	ABCD2	NP_005155.1	ENSP00000310688	S657P	FALSE	0.0532619	-3.6835	-3.731	-3.636	7.676	-7.86907	0.002	-7.2	0.95	0.805	0.834391	0.496991	0.882917	26.8	0.8174
SDD	110003	2	88991413	A	G	RPIA	NP_653164.2	ENSP00000283646	N66S	FALSE	0.953	-2.3685	-2.436	-2.301	-1.32013	2.08649	0.795	-1.01	0.218	0.153	0.324395	-0.452515	0.0607509	0.002	0.0546
SDD	110003	X	48814293	C	G	OTUD5	NP_060072.1	ENSP00000156084	E180D	FALSE	0.092	-4.5555	-3.703	-5.408	7.46289	-1.01872	0.003	-1.85	0.634	0.573	0.909017	0.0251669	0.96119	19.58	0.9978
SDD	110011	11	8719138	G	C	DENND2B	NP_005409.3	ENSP00000433528	L996V	FALSE	0.114	-3.7415	-3.659	-3.824	6.84009	-5.09797	0.002	2.57	0.722	0.319	0.806046	0.0702056	0.978741	25.8	0.2496
SDD	110014	9	131418846	C	T	DYNC2I2	NP_443076.2	ENSP00000361800	A54T	TRUE	0.23	-2.568	-2.663	-2.473	-1.31177	-0.324479	0.507	-1.02	0.07	0.114	0.553021	-0.16395	0.169071	12.92	0.0728
control	11002.s1	1	32137235	G	A	COL16A1	NP_001847.3	ENSP00000362776	P1044L	TRUE	0.074	-3.4995	-3.353	-3.646	6.44141	-2.44402	0.011	-3.37	0.55	0.553	0.661964	-0.0414691	0.255759	25.8	0.1033
control	11002.s1	1	57489303	T	G	DAB1	NP_066566.3	ENSP00000387581	T266P	TRUE	0.009	-3.0365	-2.727	-3.346	4.45789	0.76637			0.421	0.175	0.6154	-0.0436231	0.81001	27.1
control	11002.s1	7	5541497	G	T	FBXL18	NP_001308142.1	ENSP00000371805	R135S	TRUE	0.017341	-2.988	-2.39	-3.586	8.484	2.44387	0.139	5.59	0.811	0.376	0.637423	0.178325	0.705078	26.9
SDD	110022	10	72083669	G	C	LRRC20	NP_060709.2	ENSP00000350860	T67S	FALSE	0.146402	-2.8595	-2.815	-2.904	3.315	0.0109967	0.307	0.51	0.434	0.205	0.486068	-0.0715068	0.873403	22.7	0.1559
SDD	110028	3	31670800	A	G	STT3B	NP_849193.1	ENSP00000295770	Y695C	TRUE	0.097	-4.3275	-4.121	-4.534	7.67102	-10.1658	0	-3.22	0.865	0.929	0.849663	0.529838	0.999525	31	0.9712
control	11003.s1	16	70819649	C	A	VAC14	NP_060522.3	ENSP00000261776	A127S	TRUE	0.077	-2.966	-2.973	-2.959	0.113281	-0.332917	0.272	-0.2	0.231	0.073	0.647052	-0.180507	0.393723	19.33	0.0674
control	11004.s1	17	6913580	C	A	ALOX12	NP_000688.2	ENSP00000251535	H610Q	TRUE	0.094	-3.513	-3.294	-3.732	8.03271	-1.2534	0.003	-0.98	0.306	0.477	0.560638	0.0592639	0.992771	24.1	0.3947
SDD	110047	19	8808081	C	T	ACTL9	NP_848620.3	ENSP00000316674	R324H	FALSE	0.0657921	-2.722	-2.925	-2.519	1.052	-0.621775	0.402	-3.43	0.022	0.259	0.292264	-0.343207	0.0552515	0.115	0.0637
SDD	11004	3	42701243	G	A	ZBTB47	NP_660149.2	ENSP00000232974	D466N	FALSE	0	-3.437	-3.375	-3.499	4.74219	-6.93629	0.183	0.98	0.138	0.095	0.645832	-0.388973	0.343097	23	0.3871
SDD	110054	3	113010574	G	A	CFAP44	NP_001157968.1	ENSP00000377428	R1799W	FALSE	0.263	-3.7945	-3.771	-3.818	8.00195	-2.29879	0.003	2.73	0.594	0.181	0.413006	-0.399846	0.497074	25.1	0.1467
SDD	110063	16	30771694	G	A	CFAP119	NP_001014979.2	ENSP00000437532	A127V	TRUE	0.012	-3.1245	-2.927	-3.322	6.60651	0.169222	0.189		0.304	0.328		-0.152687	0.148016	11.73	0.1313
SDD	110063	17	73759209	C	T	GALK1	NP_001368914.1	ENSP00000225614	R166H	TRUE	-1	-3.2335	-3.205	-3.262	5.57141	-5.36799	0.008	-1.96	0.502	0.63	0.402146	-0.0382599	0.937257	25.3	0.2677
SDD	110071	12	59282667	A	G	LRIG3	NP_700356.2	ENSP00000326759	M246T	FALSE	0.073	-3.6955	-3.853	-3.538	5.50098	-7.60422	0.001	1.83	0.708	0.266	0.694604	0.0594247	0.986506	23.5	0.9703
control	11008.s1	17	6368072	C	T	PITPNM3	NP_112497.2	ENSP00000262483	R637Q	TRUE	0.291	-3.6765	-3.285	-4.068	7.60242	-7.21417	0	0.56	0.962	0.443	0.737254	0.214261	0.999071	25.1	0.9605
SDD	110096	15	59799507	T	C	FAM81A	NP_689663.2	ENSP00000288228	I170T	FALSE	0.0584192	-3.014	-3.087	-2.941	0.776	0.887484	0.373	1.62	0.518	0.102	0.861209	-0.106862	0.622403	21.3	0.227
SDD	110099	1	1267749	G	A	TAS1R3	NP_689414.2	ENSP00000344411	A280T	FALSE	-1	-2.764	-2.764			-3.21475	0.117	-1.86	0.294	0.283	0.387316	-0.0145719	0.710861	14.95	0.1562
SDD	11009	1	53370485	G	A	ECHDC2	NP_060751.2	ENSP00000351125	R148C	FALSE	0.001	-3.247	-3.247			-3.95502	0	-0.94	0.926	0.795	0.770488	0.386192	0.995043	29.6	0.4297
SDD	11009	3	112969630	G	A	BOC	NP_001288790.1	ENSP00000273395	R109Q	FALSE	0.439	-3.165	-3.145	-3.185	3.47607	-0.879463	0.327	2.66	0.548	0.075	0.27914	-0.256368	0.214101	23.1	0.1075
SDD	1100	4	1206816	G	A	CTBP1	NP_001319.1	ENSP00000290921	R342W	TRUE	0.109	-3.9815	-3.648	-4.315	8.70718	-8.37277	0.012	-1.88	0.894	0.743	0.749855	0.288715	0.99522	32	0.4961
SDD	11012	11	46726616	C	T	ZNF408	NP_079017.1	ENSP00000309606	R456C	TRUE	0.009	-3.474	-3.447	-3.501	6.57361	-4.37635	0.026	2.73	0.579	0.19	0.552035	-0.129635	0.893141	24.6	0.2368
SDD	11012	4	166964509	T	A	TLL1	NP_036596.3	ENSP00000061240	C488S	TRUE	0.001	-4.277	-4.679	-3.875	9.77991	-12.762	0	-0.18	0.967	0.607	0.807929	0.357314	0.997504	28.1	0.9992
control	11013.s1	10	86131994	G	A	CCSER2	NP_001271169.1	ENSP00000361160	D396N	TRUE	0.014	-3.381	-3.412	-3.35	3.72754	-1.88546	0.003	1.84	0.429	0.128	0.527774	-0.069295	0.831902	24.6	0.3319
control	11014.s1	18	54281689	C	T	TXNL1	NP_004777.1	ENSP00000217515	R234H	TRUE	0.029	-3.9675	-3.984	-3.951	5.73267	-5.88298	0.003	2.05	0.842	0.367	0.784803	-0.0280518	0.989076	29.8	0.9135
control	11014.s1	3	10276192	C	G	IRAK2	NP_001561.3	ENSP00000256458	S441C	TRUE	0.314819	-3.195	-3.061	-3.329	6.269	-1.60058	0.056	1.1	0.354	0.088	0.328255	-0.100792	0.454889	22.3	0.0694
SDD	110145	11	59419991	G	A	PATL1	NP_689929.2	ENSP00000300146	R458C	TRUE	0.013	-3.8645	-4.156	-3.573	5.78882	-4.38945	0.046	0.67	0.368	0.187	0.617681	-0.00860991	0.731833	26.5	0.3409
SDD	110145	16	9923453	C	T	GRIN2A	NP_000824.1	ENSP00000379818	V612M	TRUE	0.012	-4.3415	-4.633	-4.05	5.1145	-7.47145	0.001	0.73	0.793	0.35	0.803271	0.256517	0.990338	25.8	0.9911
control	11016.s1	1	38280996	G	T	MTF1	NP_005946.2	ENSP00000362127	P692T	TRUE	0.57	-3.2495	-3.36	-3.139	1.65857	-0.595176	0.065	2.98	0.057	0.039	0.299037	-0.322879	0.0771971	9.795	0.0961
control	11017.s1	12	48192707	A	G	HDAC7	NP_001354975.1	ENSP00000080059	M40T	TRUE	0.641975	-3.4905	-2.975	-4.006	9.397	-0.918045	0	1.88	0.754	0.268	0.754789	0.102131	0.990921	25.4
SDD	110177	9	131721381	G	A	NUP188	NP_056169.1	ENSP00000361658	A185T	FALSE	0.173653	-3.477	-3.227	-3.727	8.956	0.0191494	0.029	1.5	0.535	0.239	0.569666	-0.00308511	0.776592	25.1	0.3387
SDD	110223	19	50358248	C	T	PTOV1	NP_001292034.1	ENSP00000469128	R158W	FALSE	0.021	-3.575	-3.75	-3.4	6.48517	-4.37333			0.764		0.617832	0.179957	0.365819	28.4	0.9791
control	11024.s1	22	36715636	C	T	MYH9	NP_002464.1	ENSP00000216181	V353I	TRUE	0.106	-3.2805	-3.131	-3.43	4.22681	-1.35721	0.125	-2.23	0.246	0.274	0.48742	-0.230001	0.0981113	19.5	0.0655
SDD	110240	18	47802350	C	T	MBD1	NP_056671.2	ENSP00000269468	R173H	FALSE	0.081	-3.8235	-3.511	-4.136	8.22559	-8.92727	0.005	-3.98	0.352	0.688	0.806934	0.173074	0.743911	32	0.5279
SDD	110252	7	39446278	G	T	POU6F2	NP_009183.3	ENSP00000384004	G322V	FALSE	0.088	-3.2995	-3.195	-3.404	3.50079	-3.65324	0.002	0.88	0.941	0.34	0.818469	0.403018	0.791521	27	0.3574
control	11027.s1	9	86585713	C	T	HNRNPK	NP_002131.2	ENSP00000365458	R377H	TRUE	0.473	-3.9885	-3.843	-4.134	5.48706	-3.92226	0.051	0.7	0.275	0.175	0.767598	0.00839613	0.552481	22.5	0.3833
SDD	110276	15	74489728	G	A	STRA6	NP_071764.3	ENSP00000378537	R73C	TRUE	0.232	-3.6895	-3.763	-3.616	6.92026	-3.3524	0.03	-2.22	0.376	0.389	0.379424	0.0428384	0.70013	22.4	0.1418
control	11028.s1	14	24656632	C	T	IPO4	NP_078934.3	ENSP00000346453	A188T	TRUE	0.104	-3.126	-3.264	-2.988	0.900391	-1.04208	0.406	3.44	0.201	0.065	0.423927	-0.318651	0.306457	18.3	0.0879
SDD	110280	22	24121540	G	A	MMP11	NP_005931.2	ENSP00000215743	R92H	FALSE	0.526	-3.0635	-2.955	-3.172	2.81409	-3.39338	0.078	2.51	0.235	0.026	0.278086	-0.232934	0.0693904	14.91	0.0873
SDD	110289	7	940213	A	T	ADAP1	NP_001271240.2	ENSP00000478011	F135Y	FALSE	0.003	-2.603	-2.398	-2.808	2.84912	-4.9705			0.475		0.888113	0.0337458	0.611522	24.4	0.1235
control	11030.s1	22	37699352	C	T	CYTH4	NP_037517.1	ENSP00000248901	P202L	TRUE	0	-3.5775	-3.208	-3.947	8.46796	-5.95921	0.001	1.28	0.895	0.531	0.750377	0.178623	0.999929	27.9	0.4751
SDD	110309	12	8078480	A	T	SLC2A3	NP_008862.1	ENSP00000075120	I309N	FALSE	0.008	-4.153	-4.223	-4.083	9.21393	-9.84104	0	-1.32	0.955	0.897	0.672688	0.29436	0.994287	28.7	0.976
SDD	110309	9	138774858	G	A	CAMSAP1	NP_056262.3	ENSP00000374183	P76L	FALSE	0.633	-3.369	-3.079	-3.659	8.83252	0.727497	0	1.81	0.812	0.528	0.661477	0.290415	0.996766	27.1	0.7098
SDD	11033	1	12056215	C	T	MFN2	NP_055689.1	ENSP00000235329	T105M	TRUE	0.143	-4.7915	-5.094	-4.489	9.22333	-10.5077	0	-4.13	0.84	0.939	0.786411	0.565087	0.996368	27.3	0.9884
SDD	11033	2	40342431	A	G	SLC8A1	NP_066920.1	ENSP00000332931	S962P	TRUE	0.838	-4.16	-4.449	-3.871	6.9104	-10.4926	0.01	1.1	0.89	0.491	0.762645	0.247052	0.987066	27.2	0.9934
SDD	110343	15	93521588	C	A	CHD2	NP_001262.3	ENSP00000377747	A901E	TRUE	0	-5.944	-6.41	-5.478	11.3267	-13.1883	0	-1.37	0.967	0.864	0.906401	0.447467	0.999274	25.9	0.9997
SDD	110352	15	66727447	A	C	MAP2K1	NP_002746.1	ENSP00000302486	T55P	TRUE	0.679	-4.275	-4.926	-3.624	3.32132	-11.4244	0.135	-3.17	0.879	0.847	0.848765	0.465855	0.968408	27	0.9216
SDD	110352	6	20131403	G	C	MBOAT1	NP_001073949.1	ENSP00000324944	I149M	TRUE	0.034	-3.476	-3.261	-3.691	6.00592	-5.41925	0.001	-0.73	0.684	0.655	0.799318	0.320068	0.986016	24.2	0.1667
control	11038.s1	13	46850784	G	A	LRRC63	NP_001269389.1	ENSP00000469337	R537Q	TRUE	0.189	-3.1565	-3.477	-2.836	1.91833	-0.607831		5.11	0.107			-0.260048		8.057
control	11040.s1	22	50633461	G	A	TRABD	NP_001307413.1	ENSP00000370295	V138M	TRUE	0.01	-2.7265	-2.862	-2.591	2.43365	-2.92763	0.117	0.91	0.436	0.115	0.745459	-0.314792	0.0461681	22.5	0.17
control	11042.s1	19	14083912	C	A	RFX1	NP_002909.4	ENSP00000254325	E319D	TRUE	0.256	-2.7165	-2.635	-2.798	0.275879	-1.18676	0.096	1.13	0.171	0.052	0.660248	-0.200971	0.648357	14.78	0.0759
SDD	110425	2	203383681	A	G	BMPR2	NP_001195.2	ENSP00000363708	E253G	TRUE	0.06	-4.0515	-3.937	-4.166	7.70294	-3.46175	0.004	-3.18	0.701	0.741	0.735518	0.205933	0.982992	25.1	0.1711
SDD	110425	5	178413399	G	A	GRM6	NP_000834.2	ENSP00000430767	S619L	TRUE	0.054	-3.671	-3.853	-3.489	8.34229	-10.457	0	-2.59	0.821	0.811	0.654545	0.092523	0.894987	32	0.5796
SDD	11044	12	13761640	G	A	GRIN2B	NP_000825.2	ENSP00000477455	A636V	TRUE	0.012	-5.949	-6.29	-5.608	8.80743	-9.61498			0.782		0.87243	0.323054	0.994115	29	0.9978
control	11047.s1	1	160460440	G	C	SLAMF6	NP_001171645.1	ENSP00000357034	L117V	TRUE	0.336377	-2.9565	-3.243	-2.67	0.498	-0.180507	1	1.22	0.024	0.019	0.265583	-0.378942	0.0366418	0.055	0.0759
control	11048.s2	6	41897935	T	C	BYSL	NP_004044.3	ENSP00000230340	M166T	TRUE	0.235	-3.0765	-2.984	-3.169	6.08734	-2.12475	0.255	1.04	0.633	0.216	0.754289	-0.0596275	0.403875	22.4	0.5308
SDD	110489	12	57989687	A	C	PIP4K2C	NP_001139730.1	ENSP00000439878	N129T	FALSE	0.0614589	-2.59	-2.805	-2.375	-0.804	0.736368	0.042	1.51	0.41	0.076	0.388171	-0.251915	0.330797	23.5	0.0831
SDD	110496	10	115340420	A	C	HABP2	NP_004123.1	ENSP00000277903	E269D	FALSE	0.013	-3.0495	-3.089	-3.01	4.26587	-0.831034	0.32	-0.13	0.192	0.134	0.42558	-0.235403	0.0934715	8.886	0.2504
SDD	110496	19	57640509	C	T	USP29	NP_065954.1	ENSP00000254181	H156Y	FALSE	0.146	-2.952	-3.164	-2.74	2.23096	-0.0411843	1	0.89	0.04	0.031	0.257766	-0.344167	0.0466815	0.016	0.0653
SDD	110504	16	8995001	A	T	USP7	NP_003461.2	ENSP00000343535	I713K	TRUE	0.041	-4.4055	-4.841	-3.97	4.41479	-4.41606	0.012	3.14	0.921	0.632	0.937842	0.199252	0.975947	26	0.9978
SDD	110510	17	47007946	C	G	SNF8	NP_009172.2	ENSP00000421380	W223S	FALSE	0.117	-3.921	-3.91	-3.932	8.92215	-6.76783	0.001		0.876	0.741	0.738646	0.502563	0.999752	29.5	0.9937
SDD	110510	3	183975444	T	G	EEF1AKMT4	NP_115707.2	ENSP00000314295	V127G	FALSE	0.001	-3.358	-3.431	-3.285	6.95758	-7.58299	0	-0.72	0.747	0.764	0.516013	0.25151	0.992739	26	0.6409
SDD	110510	3	183975444	T	G	EEF1AKMT4-ECE2	NP_055508.3	ENSP00000384223	V127G	FALSE	0.974274	-3.0985	-3.358	-2.839	0.02	-7.62575	0	-0.72	0.619	0.764	0.516013	0.25151	0.992739	26	0.6409
control	11052.s1	1	48697782	G	A	SLC5A9	NP_001128653.1	ENSP00000236495	G311R	TRUE	0.006	-3.691	-3.831	-3.551	8.68408	-11.6268	0.015	-4.6	0.978	0.952	0.797002	0.545528	0.999636	28.8	0.9789
control	11053.s1	10	104835900	G	A	CNNM2	NP_060119.3	ENSP00000358894	R764Q	TRUE	0.552	-3.291	-3.181	-3.401	2.78168	-3.26	0.153	1.19	0.784	0.261	0.67425	0.0829866	0.929268	25.5	0.1671
SDD	110532	12	55420263	C	A	NEUROD4	NP_067014.2	ENSP00000242994	L14I	FALSE	0.382	-3.2225	-3.029	-3.416	7.39453	-0.69973	0.566	-3.87	0.104	0.265	0.582808	0.0441284	0.141613	13.23	0.0716
SDD	110535	11	82611383	G	T	PRCP	NP_005031.1	ENSP00000317362	A21D	FALSE	0.803	-3.042	-3.048	-3.036	1.87451	-2.95829	0.614	2.46	0.106	0.011	0.416793	-0.269677	0.0666151	8.705	0.1341
SDD	110535	1	28099847	G	A	STX12	NP_803173.1	ENSP00000363054	R10Q	FALSE	0.762	-3.0105	-2.814	-3.207	3.1712	-0.522957	0.397	1.53	0.382	0.125	0.646316	-0.241281	0.477672	23.2	0.1276
control	11056.s1	2	103124675	T	C	SLC9A4	NP_001011552.2	ENSP00000295269	F446L	TRUE	0.0954073	-3.0945	-3.052	-3.137	3.872	-5.49444	0.019	2.61	0.414	0.165	0.71274	-0.125615	0.982915	24.4	0.9131
SDD	110572	10	71640274	G	T	COL13A1	NP_001123575.1	ENSP00000381949	A151S	TRUE	0.164	-3.1035	-2.984	-3.223	3.54761	-1.21577	0.382	-2.84	0.375	0.269	0.53432	-0.172416	0.0827798	23.7	0.0945
SDD	110572	20	39831924	G	A	ZHX3	NP_055850.1	ENSP00000415498	R545C	TRUE	0.002	-3.9785	-4.145	-3.812	8.03503	-7.85793			0.768		0.776567	0.536073	0.990477	29.1	0.7775
SDD	110572	20	47991501	A	C	KCNB1	NP_004966.1	ENSP00000360806	I199S	TRUE	0.008	-5.5895	-5.999	-5.18	7.76086	-16.3985	0	-4.78	0.883	0.979	0.835936	0.571852	0.996826	27.9	0.9986
SDD	110572	4	5642543	G	A	EVC2	NP_667338.3	ENSP00000342144	R390W	TRUE	0.046	-3.69	-3.652	-3.728	7.96875	-1.91305	0.003	-1.28	0.301	0.426	0.287502	-0.179869	0.721006	25	0.1482
SDD	110575	11	8942945	G	C	C11orf16	NP_065694.2	ENSP00000318999	P441R	FALSE	0.647222	-3.057	-3.199	-2.915	4.412	-0.11571	0.073	1.49	0.194	0.068		-0.287704	0.747272	8.362	0.0777
SDD	110591	8	28980905	T	C	KIF13B	NP_056069.2	ENSP00000427900	I1153V	FALSE	0.578	-3.1585	-3.005	-3.312	7.59155	1.16302	0.06	-1.22	0.393	0.449	0.800624	0.0595423	0.843193	22.7	0.3121
SDD	110597	21	45483617	G	T	TRAPPC10	NP_003265.3	ENSP00000291574	R330L	TRUE	0.107	-3.8615	-3.441	-4.282	9.86865	0.000477266	0	1.53	0.954	0.555	0.830235	0.25989	0.994753	29.9	0.9404
SDD	110597	6	138200086	C	T	TNFAIP3	NP_006281.1	ENSP00000481570	R502W	TRUE	0.053	-3.785	-3.882	-3.688	5.81342	-4.31014			0.617		0.567186	0.0542297	0.96128	26.2	0.1529
SDD	110603	16	2138489	G	A	TSC2	NP_000539.2	ENSP00000219476	V1768M	TRUE	0.58	-2.988	-3.442	-2.534	0.731689	-1.43976	1	-2.35	0.116	0.412	0.25774	0.0254906	0.0186626	4.132	0.075
SDD	110603	9	140248799	G	T	EXD3	NP_060290.3	ENSP00000340474	H288N	TRUE	0.041	-3.4735	-3.585	-3.362	7.10486	-6.20479	0.046	0.57	0.413	0.104	0.400926	-0.154971	0.945733	19.48	0.2304
SDD	110604	12	64825503	C	T	XPOT	NP_009166.2	ENSP00000327821	P721L	FALSE	0.080429	-4.091	-4.053	-4.129	8.273	-4.80567	0.025	0.37	0.911	0.472	0.915714	0.213239	0.976384	23	0.5336
control	11061.s1	12	49458906	G	A	RHEBL1	NP_653194.1	ENSP00000301068	R178C	TRUE	0.507459	-3.4	-3.476	-3.324	3.619	-1.75616	0.007	-0.43	0.137	0.112	0.358751	-0.187555	0.473669	19.33	0.1815
SDD	110614	12	106824228	C	T	POLR3B	NP_060552.4	ENSP00000228347	P481S	TRUE	0.087	-4.009	-4.116	-3.902	9.00665	-6.28885	0.005	-2.12	0.884	0.847	0.932271	0.404552	0.995823	25.3	0.8096
SDD	110614	22	30695451	C	G	TBC1D10A	NP_001191169.1	ENSP00000384996	Q140H	TRUE	0.0921751	-3.216	-3.11	-3.322	5.144	-4.85705	0.011	2.29	0.651	0.167	0.686194	-0.0813534	0.914372	24.8	0.2265
SDD	110617	7	140453990	T	C	BRAF	NP_004324.2	ENSP00000493543	N580D	TRUE	0.033	-4.8965	-4.894	-4.899	7.83606	-13.24					0.911175	0.0895508	0.995886	24.8	0.9743
SDD	110628	12	112888156	A	G	PTPN11	NP_002825.3	ENSP00000340944	N58D	TRUE	0.948	-4.31	-4.384	-4.236	7.17279	-10.2506	0.013	-2.39	0.872	0.757	0.923429	0.129093	0.993732	26.6	0.9944
SDD	110628	6	43322598	G	T	ZNF318	NP_055160.2	ENSP00000354964	T825N	TRUE	0.0924956	-3.434	-3.247	-3.621	6.888	-0.390319	0.005	2.62	0.34	0.042	0.444642	-0.259888	0.629565	20.4	0.1945
SDD	110628	7	107615436	A	T	LAMB1	NP_002282.2	ENSP00000222399	C493S	TRUE	0.0289521	-4.156	-4.251	-4.061	9.123	-11.235	0.002	-3.39	0.979	0.957	0.709328	0.551118	0.997955	27.3	0.9957
control	11063.s1	6	46978014	G	A	ADGRF1	NP_722582.2	ENSP00000360299	S386L	TRUE	0.093	-3.0115	-3.201	-2.822	4.89917	-2.56152	0.323	1.31	0.071	0.104	0.319924	-0.295887	0.12074	7.969	0.0778
control	11064.s1	12	122257364	G	A	SETD1B	NP_001340274.1	ENSP00000474253	S1158N	TRUE	0.119641	-3.513	-4.082	-2.944	2.188	-4.37143			0.391		0.567827	-0.176292	0.45662	24.6	0.2392
control	11064.s1	18	55273861	T	C	NARS1	NP_004530.1	ENSP00000256854	H375R	TRUE	0.051	-2.6715	-2.615	-2.728	-0.648743	-0.740348	0.119	-1.76	0.176	0.119	0.264861	-0.274344	0.0249079	3.658	0.0517
SDD	110641	19	17444571	A	G	ANO8	NP_066010.1	ENSP00000159087	Y49H	FALSE	0.205	-3.0205	-2.646	-3.395	3.80688	1.99474	0.134	0.04	0.239	0.122	0.812272	-0.101911	0.802421	22.9	0.3929
SDD	110652	11	66099811	G	T	RIN1	NP_004283.2	ENSP00000310406	A763D	TRUE	0.943	-2.893	-2.867	-2.919	3.76074	-1.00956	0	2.87	0.224	0.032	0.35124	-0.223976	0.334554	4.372	0.0893
SDD	110652	22	42475827	C	T	SMDT1	NP_201575.3	ENSP00000327467	L19F	TRUE	0.765	-2.7825	-2.67	-2.895	2.76469	-1.82151	0.332	0.7	0.048	0.004	0.339138	-0.320859	0.1195	0.08	0.0491
SDD	110652	9	140057112	C	T	GRIN1	NP_015566.1	ENSP00000360616	A645V	TRUE	0.026	-5.183	-5.537	-4.829	9.44458	-12.0458	0	0.39	0.822	0.646	0.901463	0.23866	0.997281	29.3	0.9988
SDD	110656	2	135779367	T	C	MAP3K19	NP_079328.3	ENSP00000376647	H19R	FALSE	0.78	-3.5505	-3.368	-3.733	5.85107	0.81124				0.137	0.473766	0.0198126	0.969347	23.1	0.0828
SDD	110656	9	90283558	A	C	DAPK1	NP_004929.2	ENSP00000386135	H657P	FALSE	0.017	-3.199	-3.344	-3.054	2.21558	-0.805492	0.125	2.44	0.779	0.186	0.672774	0.103971	0.413847	21.9	0.0881
SDD	110656	X	100613328	G	A	BTK	NP_000052.1	ENSP00000308176	L358F	FALSE	0	-5.1955	-5.121	-5.27	8.09012	-7.7088	0.001	-3.91	0.831	0.938	0.881422	0.697975	0.997041	27	0.9954
control	11066.s1	10	96109056	T	G	NOC3L	NP_071896.8	ENSP00000360412	K403T	TRUE	0.0186966	-3.5115	-3.516	-3.507	8.039	-4.14812	0.005	1.43	0.613	0.283	0.790051	0.0341997	0.979772	26.3	0.564
control	11066.s1	8	11842028	C	G	DEFB135	NP_001028189.2	ENSP00000371643	R55G	TRUE	0.002	-2.993	-2.993			-0.289501	0.03	2.8	0.309	0.067	0.439512	-0.272496	0.739386	15.3	0.351
control	11066.s2	6	149983364	C	A	LATS1	NP_004681.1	ENSP00000437550	W965L	TRUE	0.076	-4.3725	-4.661	-4.084	9.0846	-10.1665	0.003	-0.08	0.808	0.48	0.851735	0.217227	0.999163	27.8	0.9918
SDD	110665	12	120795666	C	T	MSI1	NP_002433.1	ENSP00000257552	V163M	TRUE	0.002	-4.1125	-4.186	-4.039	6.75385	-10.5172	0	-0.92	0.802	0.669	0.87341	0.237848	0.988317	25.8	0.9987
SDD	110680	12	56661676	C	A	COQ10A	NP_653177.3	ENSP00000312587	A78D	FALSE	0.858	-2.857	-2.81	-2.904	0.307678	-2.14507	0.229	1.89	0.524	0.04	0.659247	-0.156118	0.416489	20.8	0.3484
control	11069.s1	19	50099730	G	A	PRR12	NP_065770.1	ENSP00000394510	G713D	TRUE	0.51	-2.886	-2.886		4.15869	-0.320531	0.09		0.66	0.047	0.873785	-0.0540427	0.482684	23.2	0.1881
SDD	110692	1	146756045	A	C	CHD1L	NP_004275.4	ENSP00000358262	E576A	TRUE	0.502061	-3.186	-3.1	-3.272	5.779	-6.59884	0.036	-2.53	0.803	0.753	0.592415	0.371004	0.995959	33	0.4556
SDD	110692	20	47567893	G	A	ARFGEF2	NP_006411.2	ENSP00000360985	A104T	TRUE	0.74	-3.347	-3.443	-3.251	1.71582	-0.178841	0.43	1.82	0.803	0.274	0.834263	0.0646105	0.752752	22.9	0.1421
SDD	110696	19	39663640	G	A	PAK4	NP_001014831.1	ENSP00000469413	R96H	TRUE	0.705	-3.0145	-2.803	-3.226	6.62561	-6.37614		0.78	0.542		0.651837	-0.103281	0.969236	27	0.7245
SDD	110696	9	127262899	G	A	NR5A1	NP_004950.2	ENSP00000362690	R114W	TRUE	0.044	-4.598	-4.759	-4.437	8.35348	-9.48192	0.003	-3.45	0.85	0.781	0.804399	0.325946	0.991567	32	0.5834
SDD	110705	1	151379482	C	T	POGZ	NP_055915.2	ENSP00000271715	C817Y	TRUE	0.018	-4.4285	-4.59	-4.267	9.12817	-5.25026	0.01	5.02	0.925	0.538	0.692906	0.288071	0.962908	27	0.9995
SDD	110705	20	44507097	G	A	ZSWIM3	NP_542790.2	ENSP00000255152	E634K	TRUE	0.125	-3.4915	-3.23	-3.753	6.91052	-0.0270474	0.177	1.83	0.356	0.163	0.584504	-0.0481009	0.918279	27.5	0.1702
control	11071.s1	X	77276473	G	T	ATP7A	NP_000043.4	ENSP00000345728	S938I	FALSE	-1	-4.59	-4.96	-4.22	8.38574	-7.72527	0.001	-2.43	0.924	0.849	0.811337	0.544488	0.993938	26.4	0.9787
control	11073.s1	20	30732948	C	T	TM9SF4	NP_055557.2	ENSP00000381104	S236L	TRUE	0.201	-2.979	-2.967	-2.991	0.42627	-1.28841	0.213	0.86	0.165	0.043	0.450493	-0.277906	0.416794	22.1	0.0657
control	11073.s1	8	25898178	G	T	EBF2	NP_073150.2	ENSP00000430241	T121K	TRUE	0.199	-3.059	-2.912	-3.206	2.87524	-7.01439	0.061	0.81	0.676	0.368	0.878043	0.243675	0.992216	28.6	0.9769
control	11073.s1	9	35057454	C	T	VCP	NP_009057.1	ENSP00000351777	R745H	TRUE	0.453	-4.7325	-4.541	-4.924	5.49377	-8.03924	0.018	-3.55	0.765	0.731	0.914583	0.388788	0.990098	25	0.9661
SDD	110747	12	72090282	T	A	TMEM19	NP_060749.2	ENSP00000266673	F104Y	FALSE	0.023	-3.3835	-3.525	-3.242	4.08093	-3.00978	0.01		0.593	0.584	0.670618	0.0843016	0.947897	25.9	0.3651
SDD	110747	13	46730580	C	A	LCP1	NP_002289.2	ENSP00000315757	V162F	FALSE	0.079	-3.885	-3.798	-3.972	7.60699	-9.06445	0.004	-3.85	0.825	0.763	0.752651	0.457793	0.960627	26.2	0.4804
control	11075.s1	3	151083738	A	C	MED12L	NP_443728.3	ENSP00000417235	N1061H	TRUE	0.0752294	-3.9675	-3.598	-4.337	11.614	-0.419453	0.058	1.55	0.7	0.251	0.696602	-0.0724821	0.98015	25.6	0.587
control	11075.s1	4	71024298	C	T	PRR27	NP_999876.2	ENSP00000343172	P110L	TRUE	0	-3.2745	-3.14	-3.409	3.15253	-1.72437	0.346	1.21	0.062	0.04		-0.659207	0.0336864	8.355	0.1754
control	11075.s1	9	131709450	A	G	DOLK	NP_055723.1	ENSP00000361667	C45R	TRUE	0.579	-3.526	-3.245	-3.807	10.0687	0.381548	0	-1.69	0.874	0.856	0.667083	0.415994	0.91483	29.8	0.9627
SDD	110758	4	30725998	G	C	PCDH7	NP_002580.2	ENSP00000355243	G985A	FALSE	0.59	-3.2805	-3.138	-3.423	5.90869	-2.14411	0.562	1.62	0.537	0.226	0.854537	0.0845453	0.602892	19.43	0.3272
SDD	110783	12	45004676	A	C	NELL2	NP_001138579.1	ENSP00000416341	C558G	FALSE	0.168763	-4.4655	-4.972	-3.959	8.407	-13.7953	0	-5.9	0.989	0.976	0.685116	0.588398	0.99992	28.3	0.9781
SDD	110783	6	27834754	T	C	H1-5	NP_005313.1	ENSP00000330074	K185R	FALSE	0.137	-1.7575	-1.829	-1.686	4.64691	-5.18126	0.029	1.87	0.441	0.093	0.446757	-0.0719106	0.862621	23.6	0.1712
control	11083.s1	2	152138490	T	C	NMI	NP_004679.2	ENSP00000243346	E50G	TRUE	0.288	-3.7985	-3.714	-3.883	8.54547	-3.25078	0.02	1.31	0.351	0.171	0.411821	-0.141273	0.967725	24.6	0.1332
SDD	110832	1	54722847	G	C	SSBP3	NP_001009955.1	ENSP00000360370	P127A	FALSE	0.0960591	-3.1315	-2.716	-3.547	7.029	-6.80357	0.013		0.803	0.446	0.845919	0.275352	0.988491	26.3	0.2941
SDD	110832	7	73523346	C	T	LIMK1	NP_002305.1	ENSP00000336740	R422W	FALSE	0.012	-3.726	-3.876	-3.576	6.23645	-6.36249	0.001	-0.01	0.443	0.289	0.809625	-0.113181	0.874411	25.9	0.5365
SDD	110837	19	9577690	C	A	ZNF560	NP_689689.2	ENSP00000301480	D645Y	FALSE	0.115	-3.068	-2.95	-3.186	1.64404	-1.18426	0.443	2.4	0.085	0.018	0.284167	-0.346753	0.0539313	0.363	0.1665
SDD	110837	1	47515783	C	A	CYP4X1	NP_828847.1	ENSP00000360968	N489K	FALSE	0.132	-3.281	-3.05	-3.512	5.19629	-0.267094	0.549	-0.3	0.131	0.043	0.288664	-0.246546	0.0558454	1.816	0.1644
SDD	110841	1	23403722	A	T	KDM1A	NP_001009999.1	ENSP00000383042	D579V	TRUE	0.008	-4.747	-5.072	-4.422	7.04297	-11.4776	0	-3.15	0.822	0.957	0.899135	0.525237	0.998885	33	0.9999
SDD	110847	10	134599064	G	C	NKX6-2	NP_796374.2	ENSP00000357581	P130R	TRUE	0.06	-2.662	-2.933	-2.391	0.263901	-4.42306	0.054	-2.61	0.304	0.472	0.919477	0.0709491	0.84891	23	0.2257
control	11085.s1	1	166818303	G	A	POGK	NP_060012.3	ENSP00000356850	E163K	TRUE	0.779	-3.3225	-3.324	-3.321	-0.500366	-1.28469	0	4.69	0.568	0.159	0.602338	0.0459365	0.637405	25.9	0.2137
control	11085.s1	20	42744972	C	G	JPH2	NP_065166.2	ENSP00000362071	S448T	TRUE	0.219	-2.779	-2.715	-2.843	1.32251	-0.375067	0.477	0.22	0.331	0.122	0.837749	-0.211731	0.105467	19.68	0.07
control	11086.s1	4	17818950	T	C	NCAPG	NP_071741.2	ENSP00000251496	I281T	TRUE	0.046	-3.572	-3.405	-3.739	7.17566	-1.43407	0.009	1.27	0.689	0.17	0.492718	-0.024337	0.319795	24.2	0.2841
SDD	110862	7	100417437	G	T	EPHB4	NP_004435.3	ENSP00000350896	L347M	TRUE	0.099	-3.1465	-2.926	-3.367	6.1759	-3.05885	0.109	0.38	0.403	0.197	0.548694	-0.0232935	0.753952	23.1	0.2342
SDD	110862	7	101747649	G	A	CUX1	NP_001189472.1	ENSP00000353401	R158Q	TRUE	0.246	-3.146	-3.146			-0.992899	0.115	1	0.726	0.231	0.767022	0.205837	0.272692	25.8	0.2286
SDD	110872	10	131757201	C	A	EBF3	NP_001005463.1	ENSP00000357637	C161F	TRUE	0.137	-5.5185	-6.653	-4.384	6.77209	-15.4508	0.011	-0.49	0.844	0.765	0.876217	0.366582	0.998325	32	0.9999
SDD	110875	19	48876870	G	A	SYNGR4	NP_036583.2	ENSP00000344041	V64M	FALSE	0.018	-3.0195	-3.251	-2.788	1.74649	-1.59309	0.222	1.78	0.122	0.004	0.257901	-0.495809	0.043805	0.007	0.084
control	11089.s1	2	37302699	G	A	HEATR5B	NP_061897.1	ENSP00000233099	R176C	TRUE	0.176	-4.426	-4.426		5.89722	-2.66214	0	-0.2	0.903	0.607	0.843264	0.32208	0.990004	29.4	0.9636
control	11089.s1	7	645850	C	T	PRKAR1B	NP_001158233.1	ENSP00000385749	V177I	TRUE	0.03	-2.146	-2.38	-1.912	-3.73883	4.15209	1	-1.55	0.2	0.203	0.725971	-0.178894	0.0188487	5.406	0.0442
SDD	110895	16	15129381	C	T	PDXDC1	NP_055842.2	ENSP00000379691	S693L	FALSE	0.178	-3.125	-2.952	-3.298	3.67786	-1.16485	0.193	1.68	0.206	0.052	0.364307	-0.357325	0.078603	12.65	0.072
SDD	110895	3	42676783	C	T	NKTR	NP_005376.2	ENSP00000232978	P363L	FALSE	0.042	-3.6725	-3.522	-3.823	6.71875	-2.08173	0	1.63	0.633	0.4	0.80755	0.068154	0.999865	26.3	0.9046
SDD	110895	X	62570445	T	C	SPIN4	NP_001012986.2	ENSP00000364018	Y85C	FALSE	0.063	-4.6335	-4.652	-4.615	5.40674	-6.60785				0.825	0.767173	0.35212	0.994731	26.9	0.625
control	11090.s1	1	196251455	G	A	KCNT2	NP_940905.2	ENSP00000294725	T910M	TRUE	0.167	-3.5605	-3.494	-3.627	3.64539	-0.613241	0.06	-0.92	0.544	0.264	0.810277	0.0871796	0.452343	25.9	0.1393
control	11091.s1	3	126222857	G	A	UROC1	NP_653240.1	ENSP00000290868	R295C	TRUE	0.004	-3.0315	-2.905	-3.158	4.03656	-1.56467	0.002	0.92	0.14	0.107	0.203212	-0.431611	0.236306	22.6	0.0818
control	11092.s1	19	17330492	C	T	USE1	NP_060937.2	ENSP00000263897	T217M	TRUE	0.0880102	-3.299	-3.221	-3.377	5.243	-1.88537	0.183	0.8	0.116	0.06	0.515464	-0.373488	0.0570128	21.3	0.0671
SDD	110922	1	147380773	G	A	GJA8	NP_005258.2	ENSP00000358238	G231R	TRUE	0.007	-2.3235	-2.263	-2.384	-2.60358	3.50844	0.123	-4.34	0.064	0.287	0.263027	-0.0567646	0.235536	21.1	0.0892
SDD	110922	9	129856019	G	A	ANGPTL2	NP_036230.1	ENSP00000362524	T335M	TRUE	0.00806813	-3.24	-3.087	-3.393	5.058	-3.16342	0.047	-1.51	0.683	0.661	0.861552	-0.0770123	0.158515	27	0.1076
SDD	110935	3	51992205	G	A	PCBP4	NP_001167571.1	ENSP00000417196	P362S	FALSE	0.855	-2.8635	-2.776	-2.951	-0.144165	-0.0211839	0.49	1.59	0.075	0.04	0.638479	-0.169803	0.207526	17.78	0.1269
SDD	110961	9	87366905	A	G	NTRK2	NP_006171.2	ENSP00000277120	Y434C	TRUE	0	-3.9895	-3.867	-4.112	7.26123	-6.58675	0.01	-0.82	0.828	0.59	0.746932	0.334768	0.997843	26.3	0.2875
SDD	110964	20	61909543	G	C	ARFGAP1	NP_783202.1	ENSP00000314615	G173A	FALSE	0.0399801	-3.0885	-3.077	-3.1	4.864	-5.50707	0.222	1.51	0.257	0.021	0.33499	-0.162313	0.21472	19.69	0.095
SDD	110967	1	12057357	G	A	MFN2	NP_055689.1	ENSP00000235329	V160M	TRUE	0.106	-3.931	-3.725	-4.137	7.36871	-6.42587	0.001	-4.19	0.792	0.83	0.826125	0.349288	0.976725	27.6	0.5572
SDD	110973	17	2583528	A	G	PAFAH1B1	NP_000421.1	ENSP00000380378	D358G	TRUE	0.55	-5.2595	-5.491	-5.028	9.63818	-10.7378	0.001	0.17	0.897	0.634	0.880765	0.32525	0.993108	31	0.9973
SDD	110976	2	31596766	G	C	XDH	NP_000370.2	ENSP00000368727	D553E	FALSE	0.493	-2.8285	-2.836	-2.821	0.912842	0.425357	0.909	2.86	0.231	0.061	0.417483	-0.390177	0.0436423	0.865	0.0842
SDD	110988	2	204291918	A	G	ABI2	NP_001269854.1	ENSP00000295851	Y462C	FALSE	0.73	-3.952	-3.725	-4.179	9.7392	-9.39279	0	0.55	0.912	0.61	0.923864	0.368128	0.999633	31
SDD	110991	8	94934724	A	G	PDP1	NP_060914.2	ENSP00000297598	H146R	FALSE	0.469	-4.44	-5.071	-3.809	9.82336	-13.0534	0	2.56	0.973	0.713	0.885069	0.284365	0.999596	25.5	0.9983
SDD	110997	11	76831837	G	A	CAPN5	NP_004046.2	ENSP00000498132	V457I	FALSE	0.071	-2.7645	-2.789	-2.74	2.74832	-4.24289					0.571298	-0.00895739	0.293647	24	0.0803
SDD	111011	10	119043813	T	C	PDZD8	NP_776152.1	ENSP00000334642	K811E	FALSE	0.0228311	-3.3055	-3.207	-3.404	3.782	0.656736	0.2	-2.04	0.392	0.3	0.508304	0.0561158	0.655368	23.2	0.1251
control	11106.s1	19	36230667	G	A	IGFLR1	NP_078936.1	ENSP00000246532	A222V	TRUE	0.067	-2.6775	-2.803	-2.552	2.38489	-0.648001	0.054	0.81	0.182	0.106	0.211026	-0.320218	0.113224	15.18	0.0857
control	11106.s1	3	52643674	G	A	PBRM1	NP_060783.3	ENSP00000378307	P741L	TRUE	0	-4.7655	-4.555	-4.976	11.0481	-3.77804	0	1.97	0.765	0.476	0.846188	0.119531	0.998752	27.2	0.9796
control	11106.s1	8	17731961	G	T	FGL1	NP_004458.3	ENSP00000401952	P105Q	TRUE	0.129246	-2.64	-2.601	-2.679	3.896	-0.699237	0.486	-0.95	0.287	0.085	0.377698	-0.116779	0.153826	14.61	0.0933
control	11106.s1	X	49034380	C	T	PRICKLE3	NP_006141.2	ENSP00000470248	R306H	FALSE	0.002	-3.1735	-3.067	-3.28	1.80933	-2.15541		-2.26	0.208		0.687536	0.013797	0.248974	22.4	0.1264
control	11108.s1	5	109051866	G	A	MAN2A1	NP_002363.2	ENSP00000261483	G146R	TRUE	0.639	-3.814	-3.776	-3.852	8.54199	-4.39983	0	1.85	0.935	0.606	0.720426	0.299855	0.999047	32	0.9068
control	11109.s1	4	83838686	T	A	THAP9	NP_078948.3	ENSP00000305533	W441R	TRUE	0.0402414	-4.3155	-4.262	-4.369	7.991	-4.98733	0	-3.35	0.855	0.735	0.650874	0.482269	0.998981	26.2	0.9269
SDD	111094	19	55526286	C	T	GP6	NP_001077368.2	ENSP00000308782	A343T	TRUE	0.8	-2.9745	-3.232	-2.717	-0.983154	-0.551621	0	6.64	0.036	0.012	0.275267	-0.402536	0.0404902	1.304
SDD	111094	8	144899950	A	C	PUF60	NP_510965.1	ENSP00000434359	Y274D	TRUE	0.001	-6.169	-7.305	-5.033	6.52612	-18.4485	0	2.02	0.87	0.654	0.90371	0.274218	0.996535	25.2	0.9998
control	11114.s1	11	22646797	C	G	FANCF	NP_073562.1	ENSP00000330875	R187T	TRUE	0	-2.855	-3.008	-2.702	3.50558	-0.615994	0.079	1.44	0.119	0.011	0.353441	-0.251744	0.158291	3.336	0.0931
control	11118.s1	17	40734733	T	C	RETREG3	NP_835227.1	ENSP00000309432	N301S	TRUE	0.0236686	-3.264	-3.388	-3.14	5.147	-3.68142	0.24	0.9	0.81	0.138	0.733272	-0.131977	0.820515	23.8	0.1666
control	11121.s1	17	49079077	G	A	SPAG9	NP_001124000.1	ENSP00000262013	R536W	TRUE	0.014	-4.123	-4.116	-4.13	9.59424	-5.57242	0	2.13	0.868	0.415	0.822672	0.244923	0.993587	33	0.9881
SDD	111212	2	68740357	G	A	APLF	NP_775816.1	ENSP00000307004	V163M	FALSE	0.07	-3.1075	-3.328	-2.887	2.05737	-1.55301	0.263	1.84	0.169	0.026	0.269506	-0.338058	0.0785845	5.667	0.0795
SDD	111212	9	78641895	G	A	PCSK5	NP_001177411.1	ENSP00000446280	D192N	FALSE	0.195	-3.791	-3.872	-3.71	7.21338	-7.87334	0.07	-2.3	0.916	0.753	0.835136	0.063326	0.98312	26.3	0.9877
SDD	111218	13	25425603	A	T	RNF17	NP_112567.2	ENSP00000255324	T1072S	FALSE	0.025	-2.9575	-3.215	-2.7	0.52832	0.571382	0.285	3.62	0.119	0.02	0.476529	-0.217517	0.149093	10.92	0.0962
SDD	111228	2	27346837	C	A	ABHD1	NP_115993.3	ENSP00000326491	S7R	FALSE	0.933435	-3.0955	-2.905	-3.286	6.005	-1.22005	0.014	2.49	0.342	0.083	0.307902	-0.174482	0.108847	18.58	0.1586
SDD	111235	12	27089646	C	G	INTS13	NP_060634.2	ENSP00000261191	D31H	FALSE	0.358314	-4.0935	-3.826	-4.361	9.409	-1.48224	0.001	0.67	0.888	0.565	0.867311	0.217651	0.994879	26.7	0.9962
SDD	111244	10	22015236	A	C	MLLT10	NP_004632.1	ENSP00000366272	N664H	FALSE	0.253	-3.716	-3.293	-4.139	8.24902	-1.31523	0.006	3.12	0.456	0.126	0.285959	-0.146405	0.466647	23.3	0.0921
SDD	111251	7	21943855	C	T	CDCA7L	NP_061189.2	ENSP00000383986	R357Q	FALSE	0.012	-3.5325	-3.564	-3.501	12.8727	-7.51859	0	-0.19	0.953	0.686	0.766142	0.337391	0.999512	29.9	0.9886
SDD	111255	20	57769796	C	T	ZNF831	NP_848552.1	ENSP00000360069	P1241L	FALSE	0.119	-3.011	-3.212	-2.81	0.586182	-0.207566	0.079	3.52	0.031	0.008	0.232837	-0.409885	0.0411872	5.614	0.0734
SDD	111261	7	40132678	C	T	CDK13	NP_003709.3	ENSP00000181839	A1177V	TRUE	0.304	-3.2185	-3.159	-3.278	4.57349	-1.53972	0.001	0.79	0.518	0.189	0.684426	-0.204766	0.339572	26.1	0.1462
SDD	111267	17	73998125	G	A	CDK3	NP_001249.1	ENSP00000400088	E73K	FALSE	0.0634363	-3.1465	-3.148	-3.145	2.974	-4.25242	0.028	-0.1	0.484	0.34	0.472698	-0.105698	0.312022	23.8	0.2589
SDD	111275	14	24108194	G	A	DHRS2	NP_878912.1	ENSP00000344674	V41I	FALSE	0.0210704	-2.647	-2.936	-2.358	0.207	-2.46861	0.49	1.72	0.28	0.065	0.330636	-0.193052	0.152079	6.06	0.1025
SDD	111275	17	79792759	C	G	PPP1R27	NP_001007534.1	ENSP00000331065	R24P	FALSE	0.597798	-2.697	-2.631	-2.763	3.543	-2.37593	0.097	0.01	0.866	0.313	0.671565	0.244889	0.942193	23.1	0.2391
SDD	111317	9	108366710	T	C	FKTN	NP_001073270.1	ENSP00000350687	I195T	TRUE	0.107	-2.8255	-2.948	-2.703	0.376129	-1.42167	0.516	-2.62	0.326	0.167	0.379848	-0.148004	0.0174415	17.22	0.0597
SDD	11132	6	34003689	C	G	GRM4	NP_000832.1	ENSP00000440556	R733P	FALSE	0.92	-3.2515	-3.145	-3.358	6.42419	-4.49992	0.008	-2.42	0.833	0.817	0.660157	0.412487	0.990297	27.9	0.8481
control	11135.s1	7	98988625	T	G	ARPC1B	NP_005711.1	ENSP00000496599	W204G	TRUE	0.015	-3.998	-3.725	-4.271	10.6577	-7.57075					0.733712	0.369952	0.999754	32	0.9833
SDD	11135	1	114394681	G	A	PTPN22	NP_001295226.1	ENSP00000439372	R242W	TRUE	0.0183338	-4.164	-4.178	-4.15	15.814	-11.406			0.964	0.915	0.710137	0.484306	0.999618	29	0.862
SDD	11135	9	2081995	C	T	SMARCA2	NP_003061.3	ENSP00000265773	S783L	TRUE	0	-5.923	-6.889	-4.957	8.27258	-14.036	0	-3.34	0.958	0.979	0.899717	0.534818	0.998857	33	0.995
SDD	11135	X	153284237	G	C	IRAK1	NP_001560.2	ENSP00000358997	P181R	FALSE	0.2	-3.673	-3.624	-3.722	7.00342	-1.65848	0.009	-0.91	0.087	0.104	0.305179	-0.219613	0.0741429	1.287	0.0718
SDD	11136	6	117201717	A	T	RFX6	NP_775831.2	ENSP00000332208	N131Y	TRUE	0.156	-4.108	-4.195	-4.021	8.04297	-9.99303	0	-1.72	0.91	0.905	0.834202	0.424773	0.999181	28.3	0.9806
control	11138.s1	7	4955654	G	A	MMD2	NP_940685.3	ENSP00000384141	A116V	TRUE	0.0175038	-3.2295	-3.337	-3.122	5.884	-5.27683	0.003	1.3	0.946	0.599	0.817861	0.160209	0.995881	29.8	0.9662
SDD	11138	4	153244092	G	A	FBXW7	NP_361014.1	ENSP00000474725	R689W	TRUE	0.417	-5.1545	-4.77	-5.539	13.4308	-10.288		2.2	0.907		0.914714	0.224233	0.998814	28.8	0.9986
SDD	111398	10	124896957	G	A	HMX3	NP_001099044.1	ENSP00000350549	A262T	FALSE	0.003	-3.2925	-3.261	-3.324	5.35761	-7.28538	0.016	-3.96	0.611	0.648	0.7784	0.191149	0.99166	27.8	0.6122
SDD	1113	2	127806203	C	T	BIN1	NP_647593.1	ENSP00000316779	G561S	TRUE	0.413	-3.877	-3.88	-3.874	8.77969	-8.65601	0	0.31	0.9	0.571	0.754996	0.288898	0.997127	29.2	0.9836
SDD	111410	19	58983040	A	G	ZNF324	NP_055162.1	ENSP00000196482	E394G	TRUE	0.003	-3.54	-3.424	-3.656	7.61145	-4.78822	0	1.66	0.136	0.224	0.884588	-0.0456253	0.987711	26.2	0.7822
SDD	111410	22	37964276	G	A	CDC42EP1	NP_689449.1	ENSP00000249014	E209K	TRUE	0.0128465	-3.27	-3.276	-3.264	13.392	-3.77513	0.004	1.11	0.73	0.201	0.841212	0.226309	0.926316	24.1	0.8828
SDD	111410	2	166245235	T	A	SCN2A	NP_066287.2	ENSP00000283256	I1640N	TRUE	0.156	-7.655	-7.655		8.54004	-15.6306	0	-5.26	0.912	0.966	0.90907	0.43163	0.99939	28.2	0.9942
SDD	111428	4	15780198	G	A	CD38	NP_001766.2	ENSP00000226279	G54D	FALSE	0.182	-3.645	-3.337	-3.953	7.20233	0.157881	0.006	0.64	0.235	0.102	0.373299	-0.112423	0.775274	23.2	0.7236
control	11146.s1	12	51090925	C	T	DIP2B	NP_775873.2	ENSP00000301180	T672M	TRUE	0.0759804	-3.4015	-3.605	-3.198	1.992	-2.90311	0.012	2.87	0.743	0.251	0.77077	0.0938956	0.938921	25.2	0.1308
SDD	111483	4	159894326	T	C	C4orf45	NP_689756.2	ENSP00000412215	K68E	FALSE	0.38	-3.866		-3.866	6.59085		0.549	2.5	0.372	0.052		-0.238785	0.175978	10.31	0.1731
SDD	11148	11	46771875	G	A	CKAP5	NP_001008938.1	ENSP00000432768	R1885W	TRUE	0.306	-4.721	-4.721		4.44019	-4.09491	0.004	0.8	0.769	0.368	0.735826	0.18616	0.982319	31	0.738
SDD	11148	15	64499785	G	A	CSNK1G1	NP_071331.2	ENSP00000305777	R230W	TRUE	0.002	-4.288	-4.27	-4.306	9.01562	-12.5406	0	3.05	0.912	0.506	0.901365	0.209567	0.999946	32	0.998
control	11152.s1	1	23760755	A	G	ASAP3	NP_060177.2	ENSP00000338769	V648A	TRUE	0.032	-3.1575	-3.098	-3.217	2.00415	-1.97691	0.183	-0.33	0.086	0.259	0.352137	-0.193356	0.145007	9.638	0.0667
SDD	111529	1	149858841	G	T	H2AC20	NP_003508.1	ENSP00000332194	G106V	FALSE	0.112	-3.854	-4.284	-3.424	6.5519	-11.0304	0	0.84	0.916	0.635	0.925441	0.312108	0.999059	31	0.999
SDD	11152	12	112926888	G	A	PTPN11	NP_002825.3	ENSP00000340944	G503E	TRUE	0.01	-5.179	-5.73	-4.628	10.1353	-13.7541	0.001	-5.86	0.968	0.979	0.907961	0.58513	0.99938	29.1	0.9999
SDD	111532	8	145667461	T	G	TONSL	NP_038460.4	ENSP00000386239	K275T	FALSE	0.118	-3.2	-2.984	-3.416	6.83398	1.35508	0.114	-0.88	0.231	0.22	0.416376	0.296228	0.810476	25.1	0.2562
SDD	111535	11	9864177	A	G	SBF2	NP_112224.1	ENSP00000256190	V1084A	FALSE	0.051	-3.0415	-3.106	-2.977	1.54761	0.0172246	0.364	2.97	0.365	0.129	0.344756	-0.201677	0.815527	22.9	0.2449
SDD	111535	12	58220816	A	G	CTDSP2	NP_005721.3	ENSP00000381148	I106T	FALSE	0.023	-4.5055	-4.815	-4.196	9.41281	-10.7441	0.001	2.18	0.964	0.732	0.874105	0.127138	0.984147	24.5	0.9537
SDD	111535	17	1257546	C	T	YWHAE	NP_006752.1	ENSP00000264335	R225H	FALSE	0.153	-4.9355	-4.764	-5.107	9.01871	-8.93098	0.007	0.55	0.5	0.462	0.874218	0.221019	0.996037	24.4	0.9984
control	11154.s1	1	227216757	G	A	CDC42BPA	NP_003598.2	ENSP00000355731	R1310C	TRUE	0.071	-3.3565	-3.362	-3.351	1.54517	-0.678483	0.098	3.45	0.196	0.097	0.235372	-0.262997	0.2921	22.9	0.1066
control	11156.s1	20	19664943	C	G	SLC24A3	NP_065740.2	ENSP00000333519	T342S	TRUE	0.018	-3.588	-3.404	-3.772	5.46289	-6.21239	0.078	-0.23	0.671	0.309	0.770866	0.165042	0.984453	24.8	0.9406
SDD	111561	11	687941	C	T	DEAF1	NP_066288.2	ENSP00000371846	G212S	TRUE	0.034	-3.8755	-3.949	-3.802	7.16388	-8.23869	0.001	-1.25	0.935	0.815	0.731662	0.417295	0.996051	26.3	0.9766
SDD	111575	11	86749212	A	G	TMEM135	NP_075069.3	ENSP00000306344	Y42C	TRUE	0.274	-4.326	-4.194	-4.458	14.9021	-7.28048	0	-1.34	0.95	0.877	0.626061	0.441954	0.998694	32	0.9378
SDD	111578	3	48916846	C	A	SLC25A20	NP_000378.1	ENSP00000326305	G121V	TRUE	0.009	-3.8515	-3.903	-3.8	10.2299	-9.97632	0.002	-1.87	0.988	0.872	0.847704	0.46083	0.999529	25.8	0.9588
SDD	111609	3	183956587	C	T	VWA5B2	NP_612354.1	ENSP00000398688	R710C	FALSE	0.206	-3.2595	-3.096	-3.423	5.78394	-0.792879	0.002	2.85	0.139	0.047	0.57909	-0.200821	0.844777	23.6	0.1138
SDD	11162	10	105172952	G	A	PDCD11	NP_055791.1	ENSP00000358812	G353E	FALSE	0.038	-3.332	-3.14	-3.524	6.31201	0.271431	0.002	2.41	0.242	0.127	0.574939	-0.0373819	0.934676	22.8	0.3687
SDD	111642	16	57509438	C	T	DOK4	NP_060580.2	ENSP00000344277	R90H	FALSE	0.115	-3.176	-2.874	-3.478	4.18756	-6.15136	0.102	-0.83	0.713	0.401	0.682186	-0.0438467	0.342055	23	0.6446
SDD	11165	7	38433724	C	G	AMPH	NP_001626.1	ENSP00000348602	A497P	FALSE	0.444051	-2.781	-2.85	-2.712	1.262	-0.540938	0.093	0.18	0.19	0.091	0.325578	-0.104315	0.196049	12.69	0.0845
SDD	111676	6	35199507	G	T	SCUBE3	NP_689966.2	ENSP00000274938	D114Y	TRUE	0.333	-4.6505	-5.424	-3.877	5.72876	-14.1307	0.001	-5.36	0.923	0.972	0.833953	0.566495	0.999085	29.9	0.9627
control	11168.s1	19	54578084	A	G	TARM1	NP_001129158.2	ENSP00000439454	L118S	TRUE	0.0307209	-3.612	-3.504	-3.72	6.945	-3.1587	0.002	5.67	0.497	0.13	0.336616	-0.148709	0.981537	24.1	0.7731
SDD	111689	X	132833994	A	C	GPC3	NP_004475.1	ENSP00000359854	D365E	FALSE	0.094	-3.5215	-3.415	-3.628	2.82892	0.0148997	0.156	0.87	0.234	0.017	0.644062	-0.372569	0.183722	18.81	0.2021
SDD	11168	2	37085055	C	G	STRN	NP_003153.2	ENSP00000263918	R594P	FALSE	0.033	-4.6385	-5.602	-3.675	7.94043	-14.7065	0.002	-0.32	0.892	0.661	0.674572	0.362395	0.999363	27.7	0.9973
control	11169.s1	1	150484919	G	A	ECM1	NP_004416.2	ENSP00000358043	R392Q	TRUE	0.012	-3.45	-3.499	-3.401	6.0282	-2.29082	0.129	-2.65	0.635	0.598	0.387678	0.0659581	0.843419	23.8	0.3784
control	11169.s1	X	69421748	C	T	DGAT2L6	NP_940914.1	ENSP00000328036	P161S	FALSE	0.004	-3.033	-2.798	-3.268	2.94525	0.744179	0.661	-3.41	0.454	0.588	0.469919	0.276771	0.960935	13.25	0.1449
SDD	111693	5	484653	G	A	SLC9A3	NP_004165.2	ENSP00000264938	S305L	TRUE	0.007	-3.769	-3.673	-3.865	9.96259	-10.2702	0.108	2.39	0.854	0.335	0.745951	0.0704116	0.995325	27.8	0.3135
SDD	111693	8	41812830	G	A	KAT6A	NP_006757.2	ENSP00000265713	P528S	TRUE	0.291	-4.294	-4.812	-3.776	5.91248	-6.46453	0	-0.73	0.757	0.752	0.850498	0.497049	0.999817	28.5	0.9863
SDD	111696	14	25326261	C	T	STXBP6	NP_001291405.1	ENSP00000379928	R86H	TRUE	0.016	-3.6775	-3.579	-3.776	7.53058	-2.87741	0.073		0.623	0.1	0.592652	-0.0394559	0.691378	24.2	0.1094
SDD	111696	2	166245148	T	C	SCN2A	NP_066287.2	ENSP00000283256	L1611P	TRUE	0.152	-5.171	-5.171		9.15894	-9.96976	0	-5.28	0.964	0.981	0.916186	0.554904	0.996799	29.5	0.9959
SDD	1116	15	60740231	G	A	ICE2	NP_078887.2	ENSP00000261520	R745C	FALSE	0.035	-3.642	-3.653	-3.631	8.10461	-1.26148	0		0.95	0.565	0.80338	0.323323	0.99444	32	0.3728
SDD	111717	13	37453603	A	G	SMAD9	NP_001120689.1	ENSP00000369154	L75P	FALSE	0.293	-3.256	-3.071	-3.441	9.60721	-8.0906	0.002	-1.35	0.978	0.894	0.907084	0.428707	0.993416	29.4	0.9936
SDD	111741	1	12023672	G	A	PLOD1	NP_000293.2	ENSP00000196061	R394Q	TRUE	0.005	-2.8585	-2.726	-2.991	2.05072	-2.00412	0.091	-1.94	0.212	0.31	0.282473	-0.083018	0.157458	21.5	0.0794
SDD	111759	X	149887100	C	G	MTMR1	NP_001340919.1	ENSP00000436957	L103V	FALSE	0.631368	-3.3295	-2.99	-3.669	4.331	-0.514398	0.084	-3.58		0.536	0.704288	0.38791	0.457185	18.94	0.1924
SDD	11175	1	62976273	G	A	DOCK7	NP_001258928.1	ENSP00000413583	R1443C	TRUE	0.033	-4.102	-4.278	-3.926	6.61914	-2.39308			0.668		0.844614	0.286669	0.997261	32
control	11176.s1	5	160042896	C	T	ATP10B	NP_079429.2	ENSP00000313600	E868K	TRUE	0.016	-3.146	-2.979	-3.313	5.04639	-0.027349	0.003	0.75	0.355	0.178	0.441897	0.150667	0.892954	26.7	0.0949
SDD	111770	19	12883606	C	G	HOOK2	NP_037444.2	ENSP00000380785	E126Q	FALSE	0.134	-3.245	-3.067	-3.423	7.01038	-5.06948	0.012	0.76	0.378	0.316	0.712377	-0.0379131	0.971418	25.3	0.132
control	11178.s1	21	16338241	T	A	NRIP1	NP_003480.2	ENSP00000327213	E758V	TRUE	0.053	-4.1245	-4.619	-3.63	6.99194	-3.42641	0	2.33	0.947	0.423	0.501675	0.0920834	0.9954	27.3	0.7191
SDD	111819	17	70118906	C	T	SOX9	NP_000337.1	ENSP00000245479	R160W	TRUE	0.009	-4.896	-4.884	-4.908	13.044	-13.0699	0	-4.73	0.857	0.889	0.909675	0.392553	0.999517	32	0.9996
SDD	111830	17	19689399	G	A	ULK2	NP_001136082.1	ENSP00000354877	A701V	TRUE	0.135	-3.3915	-3.126	-3.657	4.41675	-0.320884	0.079	0.5	0.477	0.062	0.525468	-0.0684478	0.718513	24.8	0.0971
SDD	111830	19	42746482	T	C	GSK3A	NP_063937.2	ENSP00000222330	T46A	TRUE	0.94684	-2.591	-2.852	-2.33	-1.246	1.7107	0.065	2.03	0.075	0.041	0.947541	-0.29879	0.110568	20.7	0.0564
SDD	111830	2	1926828	T	C	MYT1L	NP_055840.2	ENSP00000382114	D238G	TRUE	0.122	-3.5345	-3.349	-3.72	3.68579	-0.540927	0.005	0.27	0.37	0.118	0.439278	-0.0520091	0.384172	22.3	0.1973
SDD	111839	1	150772182	C	T	CTSK	NP_000387.1	ENSP00000271651	E208K	TRUE	0.021	-3.396	-3.089	-3.703	4.08325	-0.232594	0.228	-4.38	0.545	0.466	0.432409	0.143993	0.542806	17.27	0.1432
control	11186.s1	3	50378858	C	G	ZMYND10	NP_056980.2	ENSP00000231749	G436R	TRUE	0.602	-3.0915	-2.992	-3.191	1.65961	-0.130316	0.02		0.171	0.056	0.485139	-0.0439343	0.704784	24.5	0.1138
SDD	111863	19	47544334	G	A	NPAS1	NP_002508.2	ENSP00000469142	G390R	FALSE	0.024	-3.0915	-3.053	-3.13	1.88062	-2.62293		2	0.36		0.650248	-0.160454	0.787266	24.8	0.173
control	11187.s1	2	132290629	C	A	CCDC74A	NP_620125.1	ENSP00000295171	L332I	TRUE	0.077	-2.8765	-3.134	-2.619	1.55841	-1.29509	0.24	1.39	0.144	0.028	0.414904	-0.234083	0.0497079	3.669	0.0827
control	11187.s1	5	1394870	G	A	SLC6A3	NP_001035.1	ENSP00000270349	R615C	TRUE	0.94	-3.3075	-3.015	-3.6	6.25842	-1.80938	0.001	-0.9	0.732	0.801	0.482226	0.0544366	0.980029	28.7	0.1083
SDD	111874	10	70892769	A	T	VPS26A	NP_004887.2	ENSP00000263559	Y40F	TRUE	0.116	-3.0015	-2.91	-3.093	0.97467	0.224331	0.777		0.189	0.073	0.728892	-0.105417	0.467954	17.51	0.0731
SDD	111874	11	62598660	C	T	STX5	NP_003155.2	ENSP00000294179	G19D	TRUE	0.914	-3.184	-2.979	-3.389	7.13178	-0.160094	0	1.02	0.778	0.174	0.86208	0.122927	0.858585	26.1	0.592
SDD	111874	18	52896126	G	C	TCF4	NP_001077431.1	ENSP00000346440	L611V	TRUE	0.067	-4.9285	-4.774	-5.083	13.5948	-12.5025	0.001	-6.82	0.874	0.942	0.884623	0.555769	0.998945	26.2	0.9964
control	11190.s1	1	173873176	C	G	SERPINC1	NP_000479.1	ENSP00000356671	A416P	TRUE	0.067	-4.7685	-5.438	-4.099	7.4523	-7.47215	0	-2.1	0.789	0.837	0.538538	0.439801	0.999817	24.5	0.9671
control	11190.s1	6	44241187	C	T	TMEM151B	NP_001131032.1	ENSP00000393161	R174C	TRUE	0.022	-3.9605	-4.028	-3.893	7.17725	-7.68919	0		0.856	0.613	0.931867	0.446153	0.998848	27.7	0.9943
SDD	111908	17	66881408	C	T	ABCA8	NP_009099.1	ENSP00000269080	D1120N	FALSE	0.019	-3.1445	-3.148	-3.141	0.947998	0.147831	0.498	-2.18	0.128	0.119	0.280684	-0.187451	0.0605311	0.07	0.0801
SDD	111914	16	19693638	T	C	VPS35L	NP_064710.5	ENSP00000395973	I818T	FALSE	0.1781	-2.752	-2.572	-2.932	2.996	-4.6225			0.749	0.13		0.0152228	0.727226	22.5	0.2512
SDD	111919	2	86998741	C	T	RMND5A	NP_073617.1	ENSP00000283632	R340C	FALSE	0.067	-4.5005	-4.534	-4.467	9.67432	-7.67796	0	2.28	0.668	0.38	0.853506	0.204309	0.998349	31	0.9962
control	11192.s1	11	49208201	T	G	FOLH1	NP_004467.1	ENSP00000256999	N212H	TRUE	0.062	-4.0095	-3.915	-4.104	8.48132	-7.53377	0.006	3.32	0.89	0.185	0.695335	-0.146301	0.984647	25.2	0.5442
control	11194.s1	20	23433337	T	C	CST11	NP_570612.1	ENSP00000366208	M38V	TRUE	0.019	-2.6215	-2.67	-2.573	1.27698	1.004	0.114	2.7	0.054	0.014	0.328882	-0.657047	0.0211449	0.03	0.0951
control	11195.s1	3	169497153	C	A	MYNN	NP_061127.1	ENSP00000326240	N288K	TRUE	0.011	-3.1455	-3.398	-2.893	-0.25708	-0.332517	0.452	3.16	0.132	0.097	0.355466	-0.380111	0.301695	8.514	0.1474
control	11195.s1	8	70585199	C	T	SLCO5A1	NP_112220.2	ENSP00000260126	A818T	TRUE	0.95	-2.8945	-2.918	-2.871	0.555542	-0.520518	0.294	0.95	0.14	0.055	0.440228	-0.237942	0.265977	20.8	0.0825
SDD	111955	9	130425494	T	G	STXBP1	NP_003156.1	ENSP00000362399	L147W	TRUE	0.071	-6.155	-6.247	-6.063	12.6824	-11.5474	0	-1.92	0.906	0.948	0.844265	0.445867	0.997634	29	0.9892
SDD	11195	10	135139350	G	A	CALY	NP_056537.1	ENSP00000252939	A212V	FALSE	0.947589	-3.141	-3.398	-2.884	1.787	-1.90272	0.025		0.057	0.018	0.615633	-0.244621	0.0772621	15.87	0.0962
SDD	11195	22	21996659	C	T	SDF2L1	NP_071327.2	ENSP00000248958	P12S	FALSE	0.934	-2.9175	-2.748	-3.087	0.834747	-1.03689	0.525	-1.19	0.071	0.095	0.700437	-0.168911	0.115145	6.103	0.0875
control	11196.s1	5	150029165	C	T	SYNPO	NP_009217.3	ENSP00000302139	A443V	TRUE	0.079	-3.0945	-3.093	-3.096	1.93066	-0.96107	0.024	-1.36	0.329	0.178	0.45	-0.215411	0.0438221	8.657	0.0863
SDD	111987	1	169824083	A	C	SCYL3	NP_851607.2	ENSP00000356746	I499M	FALSE	0.343239	-3.0015	-3.155	-2.848	2.97	-0.898787	0.397	2.58	0.169	0.014	0.281707	-0.233794	0.0450436	2.718	0.0643
control	11200.s1	11	18313438	T	C	HPS5	NP_852608.1	ENSP00000265967	N664S	TRUE	0.249433	-2.867	-3.132	-2.602	0.089	1.27476	1	-0.96	0.087	0.139	0.204926	-0.253836	0.0174362	0.489	0.062
SDD	112022	1	110116380	G	A	GNAI3	NP_006487.1	ENSP00000358867	S47N	TRUE	0.167	-4.32	-4.652	-3.988	9.06198	-13.1129	0	-1.24	0.865	0.851	0.867847	0.173396	0.998156	27.9	0.9987
SDD	112030	14	77685869	G	A	TMEM63C	NP_065164.2	ENSP00000298351	R60Q	TRUE	0.142731	-4.027	-4.038	-4.016	9.121	-4.64021	0	-0.47	0.863	0.768	0.594263	0.1016	0.989605	33	0.7415
SDD	112047	17	10247332	C	G	MYH13	NP_003793.2	ENSP00000252172	G560A	TRUE	0.0756816	-3.3525	-3.201	-3.504	7.679	-5.48987	0	-2.22	0.687	0.863	0.793266	0.256857	0.991778	24.6	0.6103
SDD	112047	4	5710213	G	A	EVC2	NP_667338.3	ENSP00000342144	P10S	TRUE	0.94	-2.6015	-3.016	-2.187	-0.283203	-0.111501	0.418	-0.72	0.1	0.091	0.80059	-0.145934	0.057451	3.864	0.0784
SDD	11204	16	89828393	A	C	FANCA	NP_000126.2	ENSP00000373952	I939S	TRUE	0.049	-2.98	-2.627	-3.333	7.55304	1.47994	0.001	-2.29	0.697	0.492	0.402987	0.202485	0.882607	21.1	0.6447
control	11205.s1	3	184071111	C	T	CLCN2	NP_004357.3	ENSP00000265593	R652H	TRUE	0.216	-2.922	-2.775	-3.069	3.96594	-2.01102	0.038	-1.95	0.114	0.127	0.283981	-0.398124	0.0268434	10.39	0.0753
SDD	112053	12	93170621	C	T	EEA1	NP_003557.3	ENSP00000317955	R1371Q	FALSE	0.188	-3.942	-4.21	-3.674	4.39868	-3.54599	0.018	-1.06	0.639	0.615	0.676212	0.122623	0.765808	32	0.8012
SDD	112072	1	204192624	C	T	PLEKHA6	NP_055750.2	ENSP00000272203	D1041N	FALSE	0.709	-3.128	-3.155	-3.101	5.01501	-0.720046	0	2.47	0.271	0.08	0.581318	-0.314058	0.475533	24.1	0.1113
SDD	11207	10	76781704	A	C	KAT6B	NP_036462.2	ENSP00000287239	R1029S	TRUE	0.004	-3.233	-3.233		-0.711182	0.666882	0.069	2.04	0.698	0.165	0.476314	0.181903	0.614771	23.9	0.3891
SDD	112089	13	101844374	T	C	NALCN	NP_443099.1	ENSP00000251127	Q553R	TRUE	0.143902	-4.2035	-4.222	-4.185	12.61	-3.28049	0.002	-4.38	0.879	0.951	0.807198	0.554824	0.997735	27.8	0.9293
SDD	112089	16	31519517	C	T	RUSF1	NP_073581.2	ENSP00000317579	V60M	TRUE	0.277	-2.874	-2.875	-2.873	2.3147	-1.55735	0.146	0.9	0.245	0.097	0.42916	-0.264433	0.515237	13.47	0.1039
SDD	112092	4	55968601	A	G	KDR	NP_002244.1	ENSP00000263923	C688R	FALSE	0	-4.974	-5.188	-4.76	14.2622	-10.7348	0	-3.06	0.98	0.909	0.660167	0.519141	0.999939	25.3	0.9883
control	11212.s1	15	74948257	A	G	EDC3	NP_079359.2	ENSP00000320503	F213L	TRUE	0.039	-4.4285	-4.305	-4.552	10.7687	-7.53032	0		0.948	0.542	0.92963	0.46987	0.996234	24.1	0.9999
SDD	112124	19	55871083	C	G	GARIN5B	NP_001138874.1	ENSP00000398617	A385P	FALSE	0.149351	-3.161	-2.921	-3.401	5.159	0.258978	0.084	2.06	0.072	0.009	0.344538	-0.319786	0.0791412	6.456	0.1186
SDD	112162	14	45711461	C	T	MIS18BP1	NP_060823.3	ENSP00000309790	E307K	FALSE	0.105	-2.9835	-3.265	-2.702	0.571411	0.205864	0.892	2.13	0.034	0.007	0.241878	-0.415681	0.0249206	2.066	0.066
SDD	112171	14	94395363	G	C	FAM181A	NP_612353.3	ENSP00000267594	K306N	FALSE	0.0754039	-3.2645	-3.199	-3.33	4.172	-0.518916	0.003	1.18	0.467	0.101	0.505455	-0.157821	0.984507	13.52	0.3946
control	11218.s1	11	74547714	G	A	RNF169	NP_001092108.1	ENSP00000299563	R689Q	TRUE	0.03	-3.308	-3.104	-3.512	8.26611	-0.285595	0	-0.96	0.732	0.507	0.501427	0.0845806	0.589111	29	0.3584
control	11218.s1	1	156643276	C	T	NES	NP_006608.1	ENSP00000357206	G318S	TRUE	0.538	-2.655	-2.948	-2.362	0.523438	-0.325974	1	-1.97	0.12	0.178	0.254286	-0.335032	0.0411295	0.004	0.0715
SDD	112187	19	15366207	C	T	BRD4	NP_490597.1	ENSP00000263377	D650N	TRUE	0	-4.076	-3.776	-4.376	8.10669	-5.87828	0.001	2.2	0.544	0.263	0.9116	-0.0808355	0.98404	24.5	0.961
control	11224.s1	2	37496777	C	G	PRKD3	NP_005804.1	ENSP00000234179	Q586H	TRUE	0.028	-3.9595	-3.913	-4.006	8.42004	-8.5446	0	1.08	0.811	0.274	0.843901	-0.0414587	0.999066	23.3	0.9989
SDD	112247	2	241513281	G	A	RNPEPL1	NP_060696.4	ENSP00000270357	R304Q	FALSE	0.004	-2.845	-2.806	-2.884	0.215088	-2.95928				0.025	0.667453	-0.48456	0.0563734	22.6
control	11225.s1	19	50243380	G	A	TSKS	NP_068379.1	ENSP00000246801	R520W	TRUE	0.385	-3.723	-4.017	-3.429	5.34973	-3.86549	0	0.78	0.836	0.217	0.721444	-0.092937	0.953098	29.2	0.3572
SDD	112250	14	103969283	A	C	MARK3	NP_001122390.2	ENSP00000411397	T661P	TRUE	0.691939	-3.7035	-3.844	-3.563	5.655	-10.4814	0.078	0.41	0.597	0.404	0.8004	0.343213	0.964943	25.6	0.9192
SDD	112250	9	95480135	C	A	BICD2	NP_001003800.1	ENSP00000349351	K734N	TRUE	0.11	-4.155	-4.098	-4.212	10.3532	-9.81866	0.001	0.33	0.949	0.368	0.895688	0.0158069	0.990253	24.8	0.9966
control	11226.s1	1	205493463	G	A	CDK18	NP_002587.2	ENSP00000353176	R126H	TRUE	0.481068	-3.2785	-3.186	-3.371	6.353	-7.40679	0.001	-0.57	0.809	0.419	0.623675	0.0466622	0.905425	31	0.9133
control	11229.s1	13	42733479	G	A	DGKH	NP_821077.1	ENSP00000337572	G234R	TRUE	0.310443	-3.648	-3.601	-3.695	6.306	-7.83742	0.028	-1.75	0.838	0.704	0.802191	0.149051	0.848959	27.9	0.6648
control	11230.s1	6	11575684	T	C	TMEM170B	NP_001094299.1	ENSP00000368737	Y97H	TRUE	0.105	-3.991	-4.182	-3.8	3.36551	-2.23437	0.185		0.84	0.556	0.87871	0.347173	0.957199	30	0.8002
SDD	112300	17	10538822	C	T	MYH3	NP_002461.2	ENSP00000464317	R1345Q	TRUE	0.096	-3.065	-3.065		4.81763	-4.17935		-1.64	0.902		0.846554	0.0787616	0.882057	26.4	0.2409
SDD	112312	8	19675119	C	T	INTS10	NP_060612.2	ENSP00000381064	A24V	FALSE	0.185	-3.9125	-4.095	-3.73	7.31787	-2.23762	0.005		0.771	0.24	0.8364	0.37608	0.991484	31	0.9058
control	11232.s1	20	37356620	T	G	SLC32A1	NP_542119.1	ENSP00000217420	F306V	TRUE	0.001	-3.8875	-3.748	-4.027	5.52637	-3.51444	0.002	4.4	0.797	0.396	0.922022	0.176956	0.987519	31	0.9812
SDD	11233	9	133799154	G	A	FIBCD1	NP_001138578.1	ENSP00000361413	R276C	FALSE	0.022	-3.381	-3.381			-5.44261	0.039	-1.53	0.566	0.521	0.367056	-0.0943492	0.207633	26.3	0.2385
control	11234.s1	1	94054567	C	T	BCAR3	NP_001248337.1	ENSP00000359264	R299Q	TRUE	0.15	-2.756	-2.924	-2.588	-1.31116	0.357736	0.34	2.15	0.142	0.038	0.258293	-0.502382	0.0653216	16.24	0.0683
control	11234.s1	5	174102	C	T	PLEKHG4B	NP_443141.4	ENSP00000490806	R1431W	TRUE	0.145161	-3.91	-3.824	-3.996	9.303	-4.78457					0.690524	-0.234504	0.913542	26.5
SDD	112340	11	62748779	C	T	SLC22A6	NP_004781.2	ENSP00000367102	A292T	FALSE	0.003	-3.635	-3.524	-3.746	6.98462	-5.89563	0.001	0.27	0.889	0.52	0.608057	0.253585	0.998347	25.6	0.6945
SDD	112340	14	104209073	G	A	PPP1R13B	NP_056131.2	ENSP00000202556	P413L	FALSE	0.149	-3.0425	-3.104	-2.981	0.785889	-0.279851	0.07	0.87	0.079	0.067	0.247644	-0.213736	0.236528	13.37	0.0714
control	11235.s1	9	20865949	T	G	FOCAD	NP_060264.4	ENSP00000369599	F694V	TRUE	-1	-2.801	-2.801			0.594478	0.222	2.09	0.695	0.188	0.698762	0.145551	0.836779	24.7	0.1203
control	11236.s1	1	36641866	C	T	MAP7D1	NP_060537.3	ENSP00000362244	S306F	TRUE	0.443	-3.7265	-4.057	-3.396	6.02454	-10.5328	0	2.54	0.758	0.453	0.887535	0.18663	0.99104	27.3	0.991
SDD	112361	3	168810875	G	A	MECOM	NP_001098548.2	ENSP00000419995	S824L	TRUE	0.072	-3.821	-3.837	-3.805	7.99219	-5.90288	0.006	3.22	0.777	0.352	0.69811	0.0898473	0.952733	28.4	0.2488
control	11239.s1	11	58477393	A	C	GLYAT	NP_964011.2	ENSP00000340200	V246G	TRUE	0.063	-3.51	-3.6	-3.42	8.05945	-6.51628	0.001	2.15	0.403	0.218	0.307973	0.104648	0.873764	20.4	0.2944
control	11239.s1	19	41201931	C	T	COQ8B	NP_079152.3	ENSP00000315118	R391Q	TRUE	0.005	-3.171	-2.962	-3.38	7.6611	-6.00047	0.018	-0.3	0.441	0.449	0.321847	-0.115245	0.663263	24.8	0.1403
SDD	112404	5	79363926	G	C	THBS4	NP_003239.2	ENSP00000339730	R442T	FALSE	0.046	-3.425	-3.28	-3.57	6.63037	-6.46955	0.044	-1.9	0.624	0.528	0.531329	0.178549	0.907138	21.5	0.2825
control	11241.s1	2	96967339	T	C	SNRNP200	NP_054733.2	ENSP00000317123	D166G	TRUE	0.443	-3.7005	-3.599	-3.802	6.41455	-0.17104	0.279	0.93	0.509	0.292	0.858213	0.132426	0.884364	23.2	0.6562
control	11241.s1	3	32280480	C	G	CMTM8	NP_849199.2	ENSP00000307741	R6G	TRUE	0.92	-3.061	-2.85	-3.272	3.89578	-0.574797	0.065	1.43	0.177	0.202	0.820632	-0.0413682	0.916105	24.2	0.1346
SDD	112410	14	65210275	G	A	PLEKHG3	NP_001295076.1	ENSP00000247226	A1172T	FALSE	0.339	-3.114	-3.06	-3.168	7.81592	-0.331503			0.094	0.123	0.379572	-0.166004	0.345691	15.43	0.0764
SDD	112449	14	24842929	C	T	NFATC4	NP_004545.2	ENSP00000250373	R530W	TRUE	0.01	-4.0635	-4.165	-3.962	12.1392	-10.6388	0	-2.07	0.85	0.818	0.929946	0.436898	0.999323	32	0.9989
SDD	112449	3	10076174	A	G	FANCD2	NP_149075.2	ENSP00000287647	Q76R	TRUE	0.193	-3.5375	-3.527	-3.548	6.65479	-0.32747	0	0.42	0.426	0.298	0.467418	0.194113	0.985852	25.6	0.2314
SDD	112460	5	170598229	T	A	RANBP17	NP_075048.1	ENSP00000427975	W602R	FALSE	0.036	-3.1935	-2.985	-3.402	4.82458	0.414828	0.045	-0.22	0.582	0.507	0.821072	0.27413	0.894392	23.1	0.3679
SDD	112470	17	27957891	G	A	SSH2	NP_203747.2	ENSP00000269033	R1414W	FALSE	0.661	-3.832	-3.701	-3.963	7.86621	-1.83356	0	2.24	0.691	0.263	0.731348	0.0390472	0.881927	26.3	0.3859
SDD	112470	19	920659	C	T	KISS1R	NP_115940.2	ENSP00000234371	P370S	FALSE	0.789	-2.459	-2.671	-2.247	-1.69238	-0.90856	0.189	-0.41	0.093	0.132	0.66535	-0.133414	0.17613	10.77	0.0848
SDD	112486	1	36938165	A	T	CSF3R	NP_000751.1	ENSP00000362198	C266S	FALSE	0.04	-3.919	-4.064	-3.774	7.36359	-5.90916	0.157	0.52	0.884	0.283	0.573921	0.225089	0.735889	24.7	0.9082
SDD	112506	22	24562947	G	A	CABIN1	NP_036427.1	ENSP00000263119	R1783H	FALSE	0.484211	-3.415	-3.437	-3.393	7.227	-0.535177	0.008	-1.34	0.127	0.188	0.505693	-0.135521	0.440811	13.97	0.0727
control	11251.s1	2	169780296	G	A	ABCB11	NP_003733.2	ENSP00000497931	R1268W	TRUE	0.165	-4.027	-4.028	-4.026	11.0189	-8.9767					0.829666	0.30232	0.999801	32	0.6471
control	11252.s1	6	86201766	A	G	NT5E	NP_002517.1	ENSP00000257770	K478E	TRUE	0.881	-2.8395	-2.887	-2.792	0.691406	-1.34039	0.961	0.64	0.069	0.055	0.21307	-0.188901	0.0265831	15.01	0.1118
SDD	112534	16	31271393	T	G	ITGAM	NP_000623.2	ENSP00000441691	L3R	FALSE	0.869	-2.946	-3.364	-2.528	-0.123657	-1.81934	0.237	0.06	0.284	0.095	0.255419	-0.322258	0.0359965	2.684	0.0466
SDD	112539	19	36231925	C	T	IGFLR1	NP_078936.1	ENSP00000246532	D53N	FALSE	0.166	-3.076	-2.873	-3.279	9.59497	-1.05712	0.299	-2.98	0.433	0.272	0.441886	0.0816638	0.885609	32	0.2119
control	11254.s1	15	41193102	G	A	VPS18	NP_065908.1	ENSP00000220509	D696N	TRUE	0.0314843	-3.2345	-3.316	-3.153	5.75	-3.80339	0	1.71	0.934	0.505	0.883576	-0.0742817	0.966892	29.2	0.8476
SDD	112551	16	89257794	G	T	CDH15	NP_004924.1	ENSP00000289746	R430L	TRUE	0.002	-2.667	-2.718	-2.616	1.12274	-0.569003	1	0.71	0.186	0.018	0.288016	-0.263762	0.0303588	2.115	0.0983
SDD	112556	11	56468564	T	C	OR9G1	NP_001005213.1	ENSP00000493255	L234P	FALSE	0.0450059	-3.808	-3.543	-4.073	6.338	-3.7305					0.187468	-0.186224	0.436886	20.2	0.1676
SDD	112559	17	7246853	G	A	ACAP1	NP_055531.1	ENSP00000158762	R167Q	FALSE	0.279531	-3.1825	-3.086	-3.279	4.019	-0.893858	0.237	3.8	0.175	0.125	0.334758	-0.327573	0.0958583	16.19	0.1005
SDD	112568	X	153197526	A	C	NAA10	NP_003482.1	ENSP00000417763	F128L	FALSE	0.013	-5.448	-5.433	-5.463	10.2143	-12.6748	0.001	-0.92	0.915	0.75	0.886986	0.252636	0.980385	23.3	1
control	11257.s1	3	44683742	A	G	ZNF197	NP_001310222.1	ENSP00000345809	M374V	TRUE	0.019	-3.0505	-2.896	-3.205	-1.0957	2.23817	0.183	3.54	0.21	0.022	0.301974	-0.34822	0.0281837	13.46	0.0577
control	11257.s1	3	44683742	A	G	ZNF660-ZNF197	NP_001338661.1	ENSP00000379370	M374V	TRUE	0.00134771	-2.604	-2.768	-2.44	1.051	2.23817	0.183	3.54	0.198	0.022	0.301974	-0.34822	0.0281837	13.46	0.0577
SDD	112612	X	101970897	A	T	ARMCX5-GPRASP2	NP_001186747.1	ENSP00000339057	Q367L	FALSE	0.0942408	-3.409	-3.659	-3.159	3.523	-1.50273	0.063	3.15	0.148	0.094	0.34524	-0.375819	0.0946911	6.873	0.111
SDD	112637	10	21101805	G	C	NEBL	NP_006384.1	ENSP00000366326	P804R	FALSE	0.795	-3.629	-3.763	-3.495	6.75073	-5.45849	0.003	2.87	0.931	0.359	0.609326	0.116728	0.985349	26.6	0.5399
SDD	112640	8	16884816	C	T	MICU3	NP_859074.1	ENSP00000321455	P10S	FALSE	0.939	-3.119	-2.815	-3.423	6.61932	-0.10507	0.095	0.49	0.398	0.034	0.777824	-0.141586	0.231425	19.02	0.1394
SDD	11264	16	58075766	G	A	MMP15	NP_002419.1	ENSP00000219271	V386M	TRUE	0.005	-3.3845	-3.409	-3.36	7.2771	-8.17187	0.001	4.25	0.879	0.429	0.874569	0.21664	0.992854	29.9	0.8504
control	11265.s1	19	56572874	C	T	NLRP5	NP_703148.4	ENSP00000375063	R1195W	TRUE	0.848	-2.695	-2.695			-0.196277	0.029	-0.74	0.301	0.143	0.363371	-0.242731	0.150128	19.53	0.1487
control	11265.s1	3	184040619	G	C	EIF4G1	NP_937885.1	ENSP00000317600	K438N	TRUE	0.245451	-3.74	-3.38	-4.1	8.27	-1.24096	0.005	0.77	0.343	0.155	0.726408	-0.127711	0.940675	25.7	0.826
SDD	112664	16	88891266	T	C	GALNS	NP_000503.1	ENSP00000268695	Y384C	TRUE	0.02	-3.298	-3.459	-3.137	7.33517	-7.03884	0.001	-2.93	0.897	0.722	0.515056	0.144821	0.81812	25.3	0.3512
SDD	112664	1	231114561	A	C	TTC13	NP_078801.3	ENSP00000355621	C6G	TRUE	0.989583	-3.383	-3.02	-3.746	7.88	-0.409492	0.652	0.91	0.139	0.069	0.635793	-0.17817	0.0874415	13.71	0.0523
control	11267.s1	10	28971295	A	G	BAMBI	NP_036474.1	ENSP00000364683	M250V	TRUE	0.372	-2.9785	-3.093	-2.864	1.1265	0.929341	0.079		0.404	0.19	0.645088	-0.115324	0.168456	19.89	0.0718
SDD	112674	14	24843005	G	A	NFATC4	NP_004545.2	ENSP00000250373	R555Q	FALSE	0.017	-3.7145	-3.647	-3.782	10.5509	-6.55681	0	0.91	0.844	0.551	0.786864	0.268079	0.998274	33	0.9837
SDD	112674	9	130474130	A	G	CFAP157	NP_001012520.2	ENSP00000362392	E296G	FALSE	0.0709046	-3.3665	-3.437	-3.296	6.432	-2.39541	0.006	0.9	0.131	0.119		-0.0986602	0.98906	26.5	0.123
SDD	11267	2	20138082	C	A	WDR35	NP_001006658.1	ENSP00000314444	K680N	TRUE	0.026	-3.383	-3.452	-3.314	3.99677	-0.907678	0.189	-0.24	0.242	0.204	0.617102	-0.123026	0.7961	16.92	0.149
control	11268.s1	6	39041545	G	A	GLP1R	NP_002053.3	ENSP00000362353	G275S	TRUE	0.005	-3.714	-3.356	-4.072	7.48181	-3.92232	0.004	-0.08	0.961	0.77	0.411897	0.238509	0.981274	34	0.4599
SDD	112694	12	53849254	T	A	PCBP2	NP_005007.2	ENSP00000352438	S35T	TRUE	0.08	-3.1525	-3.247	-3.058	-2.76978	0.305476	1	1.82	0.184	0.084	0.828775	-0.217177	0.76243	19.63	0.1605
SDD	112703	10	60556128	A	G	BICC1	NP_001073981.1	ENSP00000362993	N403S	TRUE	0.011	-3.534	-3.197	-3.871	7.46558	0.00281336	0.034	1.38	0.974	0.273	0.826261	-0.0903048	0.979049	25.6	0.7279
SDD	112703	14	23874847	A	C	MYH6	NP_002462.2	ENSP00000386041	W112G	TRUE	0.166	-3.223	-3.345	-3.101	3.9646	-6.98291	0	-0.38	0.782	0.544	0.889693	0.132863	0.994424	26.4	0.8778
SDD	112712	12	112888220	A	G	PTPN11	NP_002825.3	ENSP00000340944	Q79R	TRUE	0.942	-3.8455	-3.658	-4.033	6.29889	-7.60764	0.003	-3.99	0.934	0.933	0.878018	0.515809	0.973175	26.2	0.964
SDD	112719	11	686914	T	C	DEAF1	NP_066288.2	ENSP00000371846	K250E	TRUE	0.007	-4.15	-4.405	-3.895	8.13971	-13.9984	0.001	-1.87	0.808	0.919	0.840555	0.438993	0.994949	25.5	0.9999
SDD	112722	13	25458102	G	A	CENPJ	NP_060921.3	ENSP00000371308	R1275C	TRUE	-1	-3.572	-3.601	-3.543	6.96814	-2.00204	0.05	-1.22	0.308	0.242	0.347244	-0.231869	0.596738	18.45	0.0997
SDD	112722	2	28999810	C	G	PPP1CB	NP_996759.1	ENSP00000398839	P49R	TRUE	0.118	-5.261	-5.079	-5.443	7.11974	-8.85223	0	0.78		0.438	0.8944	0.163481	0.999807	26.7	0.9609
SDD	112734	3	48465462	G	A	PLXNB1	NP_002664.2	ENSP00000351338	R187W	FALSE	0.817	-4.025	-4.111	-3.939	6.1499	-4.78641	0	0.27	0.572	0.357	0.776704	0.114602	0.999581	31	0.833
SDD	112742	18	48604676	A	G	SMAD4	NP_005350.1	ENSP00000341551	I500V	TRUE	0.222	-4.0445	-3.661	-4.428	5.92767	-5.08414	0.041	-5.1	0.718	0.71	0.863077	0.362928	0.712918	23.9	0.6162
SDD	112754	18	45566620	G	A	ZBTB7C	NP_001034449.1	ENSP00000439781	R287W	TRUE	0.04	-3.421	-3.349	-3.493	5.91235	-5.67939	0.002	2.7	0.669	0.104	0.733767	-0.194158	0.770296	25.5	0.4494
SDD	112754	2	241723215	C	T	KIF1A	NP_004312.2	ENSP00000497030	V247M	TRUE	0.332	-5.1745	-5.19	-5.159	14.0635	-12.5372					0.802696	0.363969	0.996626	26.6	0.9878
control	11276.s1	1	33354782	G	A	HPCA	NP_002134.2	ENSP00000362566	G95S	TRUE	0.001	-4.0655	-4.308	-3.823	6.48738	-11.8706	0.001	0.56	0.852	0.583	0.813336	0.163245	0.999356	28.3	0.9718
SDD	112763	3	43474151	C	T	ANO10	NP_060545.3	ENSP00000292246	M622I	FALSE	0.128	-2.703	-2.626	-2.78	-2.79816	0.882419	0.361	0.08	0.229	0.073	0.26114	-0.318862	0.0529106	16.78	0.149
SDD	11280	2	48040455	C	G	FBXO11	NP_001177203.1	ENSP00000384823	K715N	TRUE	0.12	-4.8795	-5.025	-4.734	6.47797	-8.15569	0.005	-1.36	0.712	0.562	0.92513	0.0656707	0.991485	23.8	0.9999
SDD	11280	9	117118270	G	C	AKNA	NP_001304879.1	ENSP00000363201	P998R	TRUE	0.07	-2.8185	-3.313	-2.324	0.122803	-1.27838	0.836	2.76	0.076	0.012	0.221403	-0.420406	0.0171791	0.174	0.0666
control	11282.s1	2	219894385	C	G	CFAP65	NP_919278.2	ENSP00000340776	A464P	TRUE	0.032	-3.4875	-3.428	-3.547	6.77466	-1.0843	0.263	3.49	0.287	0.116	0.279353	-0.152519	0.476161	18.83	0.5354
SDD	112835	12	53162775	T	A	KRT76	NP_056932.2	ENSP00000330101	S547C	FALSE	0.739639	-2.782	-2.835	-2.729	3.557	-3.27777	0.153	-1.67	0.214	0.421	0.524904	-0.0473037	0.132283	7.697	0.0996
SDD	112835	14	24737768	C	T	RABGGTA	NP_878256.1	ENSP00000216840	V320I	FALSE	0.075	-3.101	-3.083	-3.119	3.12445	-1.48249	0.388	0.78	0.219	0.065	0.470419	-0.457006	0.0331568	16.89	0.1017
SDD	112835	18	21109204	C	T	RMC1	NP_037458.3	ENSP00000269221	A453V	FALSE	0.111	-2.932	-3.127	-2.737	1.49219	-0.0543986	0.904		0.79	0.207		0.194162	0.821157	22.2	0.1909
SDD	11283	18	52896236	T	C	TCF4	NP_001077431.1	ENSP00000346440	N574S	TRUE	0.066	-5.1725	-5.36	-4.985	13.1066	-13.6639	0.002	-5.07	0.88	0.913	0.835049	0.288876	0.997278	26.4	0.9955
SDD	112846	2	136609009	A	G	MCM6	NP_005906.2	ENSP00000264156	L627P	FALSE	0.0603265	-4.605	-4.692	-4.518	11.917	-11.2934	0	2.51	0.982	0.761	0.844646	0.272932	0.999629	31	0.9993
SDD	112854	21	47409541	G	T	COL6A1	NP_001839.2	ENSP00000355180	G293V	TRUE	0.12	-3.9525	-4.247	-3.658	7.98669	-10.4666	0	-6.29	0.983	0.98	0.91889	0.589298	0.999686	30	0.9721
SDD	112854	5	96129104	A	G	ERAP1	NP_057526.3	ENSP00000296754	V396A	TRUE	0.007	-3.345	-3.216	-3.474	5.74744	-3.91489	0.091	4.17	0.717	0.258	0.538859	0.106733	0.919004	26.1	0.1147
SDD	112871	10	1126409	C	T	WDR37	NP_054742.2	ENSP00000263150	T130I	TRUE	0.105	-3.978	-4.03	-3.926	7.16864	-9.43994	0.003	-0.15	0.537	0.415	0.85639	0.201877	0.959233	23.4	0.9993
SDD	112871	3	128181935	C	T	DNAJB8	NP_699161.1	ENSP00000316053	A52T	TRUE	0.007	-3.411	-3.5	-3.322	12.5618	-8.88557	0.021	-0.1	0.936	0.681	0.753866	0.331823	0.998781	26.6	0.9643
SDD	112880	12	71523153	C	A	TSPAN8	NP_004607.1	ENSP00000247829	L206F	FALSE	0.089	-3.062	-3.14	-2.984	2.30185	-2.22136	0.165	-2.61	0.057	0.282	0.361848	-0.105616	0.172429	0.138	0.2512
SDD	112880	1	51253824	G	A	FAF1	NP_008982.1	ENSP00000379457	P72L	FALSE	0.408	-3.165	-3.135	-3.195	1.39478	-1.48786	0.01		0.425	0.109	0.310192	-0.0324161	0.785009	24	0.0741
SDD	11289	22	50956466	A	G	NCAPH2	NP_001171940.1	ENSP00000299821	N162S	FALSE	0.104	-2.4475	-2.784	-2.111	-1.08911	1.03298	0.907		0.051	0.043	0.23642	-0.346128	0.0323294	0.008	0.0548
SDD	11289	4	3319200	A	G	RGS12	NP_937872.1	ENSP00000339381	S435G	FALSE	0.163	-2.7995	-2.979	-2.62	1.58154	-0.0285951	0.263	1.26	0.072	0.095	0.41606	-0.184144	0.394459	20.9	0.073
SDD	112900	16	839651	C	T	CHTF18	NP_071375.1	ENSP00000262315	T181I	FALSE	0.138	-2.9215	-2.664	-3.179	9.854	-4.84402	0.098	2.43	0.758	0.321	0.706663	-0.035162	0.984384	23.7	0.6359
SDD	112913	1	176838073	G	A	ASTN1	NP_996991.1	ENSP00000395041	S1185F	TRUE	0.294	-3.4355	-3.476	-3.395	4.69336	-1.15061	0.002	2.36	0.542	0.284	0.633039	-0.0663154	0.923007	24.9	0.3584
SDD	112913	22	18222125	C	T	BID	NP_001231496.1	ENSP00000449236	R118Q	TRUE	0.0208333	-3.119	-3.414	-2.824	1.236	-0.484498	0.069	1.93	0.233	0.058	0.218202	-0.468622	0.0234558	16.33	0.0876
SDD	112913	5	1268642	G	A	TERT	NP_937983.2	ENSP00000309572	R859W	TRUE	0.057	-3.897	-4.11	-3.684	6.89581	-3.71404	0.006	-4.89	0.266	0.344	0.210599	0.0355544	0.884296	25.4	0.1242
SDD	112918	12	112915523	A	G	PTPN11	NP_002825.3	ENSP00000340944	N308D	TRUE	0.001	-4.388	-4.115	-4.661	10.0412	-9.40284	0.014	-5.98	0.951	0.838	0.875879	0.208319	0.579811	24.5	0.9963
SDD	112921	18	55273937	G	A	NARS1	NP_004530.1	ENSP00000256854	L350F	TRUE	0.001	-3.2165	-3.243	-3.19	4.20349	-6.22877	0.033	-1.45	0.781	0.553	0.633866	0.105433	0.948922	23.8	0.3192
SDD	112921	4	68360896	G	C	CENPC	NP_001803.2	ENSP00000273853	N722K	TRUE	0.161	-2.7265	-2.82	-2.633	1.9978	1.57816	0.38		0.09	0.133	0.445856	-0.496012	0.0249052	0.928	0.1447
SDD	112925	16	81479037	T	A	CMIP	NP_938204.2	ENSP00000446100	V64D	TRUE	0.507	-3.23	-3.049	-3.411	2.97388	-1.03196	0.204	0.84	0.681	0.177	0.95036	-0.0769926	0.355234	22.8	0.9105
SDD	112925	17	31439048	G	A	ASIC2	NP_899233.1	ENSP00000225823	S249L	TRUE	0.004	-3.818	-3.796	-3.84	7.23267	-5.84909	0.001	-0.25	0.739	0.469	0.73269	0.144806	0.997233	29.2	0.2836
SDD	112925	5	67593305	C	G	PIK3R1	NP_852664.1	ENSP00000428056	P684R	TRUE	0.053	-4.7745	-4.943	-4.606	9.41626	-10.7662	0	-2.23	0.788	0.918	0.906614	0.44219	0.998561	26.7	0.9989
SDD	112946	17	35969397	G	C	SYNRG	NP_009178.3	ENSP00000483453	L3V	FALSE	0.475369	-3.4345	-3.276	-3.593	5.82	0.0892381			0.446		0.882457	0.0843128	0.71468	23	0.2459
SDD	112952	17	27076365	G	C	TRAF4	NP_004286.2	ENSP00000262395	D395H	FALSE	0.026	-3.5545	-3.405	-3.704	6.83673	-4.9984	0.013	0.97	0.722	0.263	0.85007	0.219174	0.913692	28.3	0.9038
SDD	112955	3	183706444	C	T	ABCC5	NP_005679.2	ENSP00000333926	R120H	FALSE	0.178917	-3.294	-3.375	-3.213	3.782	-1.20424	0.549	-2.2	0.146	0.19	0.221016	-0.363258	0.0229303	9.468	0.0891
control	11296.s1	5	37329315	A	G	NUP155	NP_705618.1	ENSP00000231498	I597T	TRUE	0.107	-3.054	-3.016	-3.092	1.4563	0.503958	0.541	-1.05	0.423	0.307	0.674119	0.0412721	0.838632	22.6	0.3068
SDD	112964	15	29398862	C	T	APBA2	NP_005494.2	ENSP00000454171	S586L	FALSE	0.014	-4.1885	-4.414	-3.963	12.467	-14.8493	0	1.68	0.937		0.791399	0.23183	0.99781	29.2	0.9965
SDD	112970	19	13476272	C	A	CACNA1A	NP_001120693.1	ENSP00000489913	V215F	TRUE	0.61	-5.307	-6.481	-4.133	7.79102	-12.9526					0.906483	0.55227	0.999345	27	0.9501
SDD	112976	15	88690618	G	A	NTRK3	NP_002521.2	ENSP00000377990	R138W	FALSE	0.826177	-3.294	-3.202	-3.386	5.591	-7.79624	0.029	0.32	0.789	0.259	0.808191	-0.0761449	0.273425	28	0.3908
SDD	112976	19	49481383	C	G	GYS1	NP_002094.2	ENSP00000317904	G401R	FALSE	0.015	-3.5375	-3.67	-3.405	6.41925	-10.4347	0	-0.45	0.722	0.734	0.802027	0.37742	0.999407	27.7	0.9943
SDD	112979	11	18568531	G	A	UEVLD	NP_001035787.1	ENSP00000379500	S261L	TRUE	0.002	-3.8365	-3.793	-3.88	9.39453	-7.54535	0	-2.46	0.634	0.811	0.468574	0.119992	0.97265	28.2	0.1992
SDD	112979	14	80164252	G	A	NRXN3	NP_004787.2	ENSP00000451648	R926H	TRUE	0.149	-3.3345	-3.093	-3.576	4.67358	-5.25006	0.003	-0.4	0.59	0.341	0.784535	0.0165368	0.383022	29.7
control	11298.s1	8	22079267	C	G	PHYHIP	NP_055574.3	ENSP00000415491	D198H	TRUE	0.0465686	-3.888	-3.715	-4.061	9.271	-1.05745	0.188	1.45	0.729	0.283	0.78583	0.0967462	0.969521	24	0.9968
SDD	112983	1	116233752	C	T	VANGL1	NP_620409.1	ENSP00000347672	R443W	TRUE	0.212	-3.325	-3.297	-3.353	6.70935	-5.34699	0.013	-1.51	0.511	0.609	0.623443	-0.056731	0.78065	26.8	0.2998
SDD	112986	4	22440041	G	T	ADGRA3	NP_660333.2	ENSP00000334952	A308D	FALSE	0.113	-3.2705	-3.04	-3.501	5.48682	-0.378568	0.361	-0.25	0.847	0.396	0.868871	0.298319	0.893689	25.1	0.8137
SDD	112988	2	112990921	C	A	ZC3H8	NP_115883.2	ENSP00000386488	A217S	FALSE	0.001	-3.9265	-3.684	-4.169	8.94644	-0.954259	0.084	1.46	0.266	0.061	0.439973	-0.198506	0.898631	24.9	0.1845
SDD	112988	5	176301104	C	T	UNC5A	NP_588610.2	ENSP00000332737	S341L	FALSE	0.112651	-3.5975	-3.423	-3.772	10.317	-0.695901	0	0.37	0.857	0.4	0.761353	0.311596	0.996217	27.4	0.4819
SDD	112988	6	147055057	G	T	ADGB	NP_078970.3	ENSP00000381036	M895I	FALSE	0.023	-2.8355	-2.933	-2.738	2.15112	1.35425	0.744	1.6	0.125	0.011	0.293295	-0.293678	0.0126134	1.058	0.1457
SDD	112988	7	1527550	G	C	INTS1	NP_001073922.2	ENSP00000385722	R788G	FALSE	0.084	-3.098	-3.13	-3.066	2.96484	-0.912158	0.131	0.9	0.515	0.104	0.497071	-0.114435	0.39222	18.52	0.1882
SDD	113001	2	191364795	T	C	MFSD6	NP_060164.3	ENSP00000376141	C743R	TRUE	0.832031	-2.696	-2.598	-2.794	0.608	1.60257	0.305	1.6	0.024	0.058	0.229255	-0.296405	0.0467957	0.061	0.0488
SDD	113001	2	39249915	T	C	SOS1	NP_005624.2	ENSP00000384675	R552G	TRUE	0.017	-3.902	-3.389	-4.415	9.54321	-0.970695	0.001	-2.43	0.961	0.921	0.839774	0.423541	0.95558	25.5	0.9804
SDD	113005	20	3844930	G	A	MAVS	NP_065797.2	ENSP00000401980	R218H	FALSE	0.048913	-3.1535	-3.238	-3.069	2.235	-1.16821	0.208	2.41	0.105	0.149	0.249242	-0.447174	0.0574338	14.75	0.0825
SDD	113008	14	81046728	C	A	CEP128	NP_689659.2	ENSP00000451162	G949V	FALSE	0.272	-3.1825	-3.126	-3.239	1.95557	0.613021	0.405	1.53	0.297	0.124	0.430011	-0.169555	0.193012	19.87	0.1079
SDD	113011	17	27002079	C	T	SUPT6H	NP_001307684.1	ENSP00000338143	A146V	FALSE	0.302	-3.797	-3.584	-4.01	5.22803	0.00490537	0.005		0.652	0.182	0.802469	0.177036	0.896228	25.1	0.7805
SDD	113015	7	100850896	G	A	PLOD3	NP_001075.1	ENSP00000223127	P633L	TRUE	0.123	-3.1455	-2.958	-3.333	6.92957	-7.02285	0.001	-0.64	0.987	0.86	0.730533	0.395076	0.999392	26.4	0.3958
SDD	113029	16	23507030	T	C	GGA2	NP_055859.1	ENSP00000311962	N54S	FALSE	0.0833333	-3.0835	-2.979	-3.188	4.832	-2.53402	0.03	1.77	0.808	0.193	0.631837	-0.165774	0.986443	33	0.0944
SDD	113029	17	4837674	G	A	GP1BA	NP_000164.5	ENSP00000329380	R592Q	FALSE	0.46	-3.338	-3.163	-3.513	5.1582	-0.439674	0.06	0.06	0.068	0.081	0.226958	-0.292449	0.119021	15.55	0.1092
SDD	113035	19	7565758	G	A	TEX45	NP_940936.2	ENSP00000355241	R17Q	FALSE	0.285199	-3.098	-3.224	-2.972	3.567	-0.443759	0.356	2.37	0.099	0.003		-0.399249	0.110586	4.844	0.0828
SDD	113043	5	134010365	C	A	SEC24A	NP_001239160.1	ENSP00000321749	P293H	FALSE	0.017	-3.495	-3.415	-3.575	5.75549	-3.67815	0.018	1.72	0.858	0.259	0.585403	0.0526168	0.98391	25.2	0.3269
SDD	11304	6	97634409	C	T	MMS22L	NP_940870.2	ENSP00000275053	V733I	FALSE	-1	-3.566	-3.566			-0.515011	0.843	2.24	0.081	0.017	0.262327	-0.437295	0.0146814	8.452	0.0722
SDD	113059	17	34149682	A	G	TAF15	NP_631961.1	ENSP00000474096	Y110C	FALSE	0.036	-3.251	-3.199	-3.303	6.24426	-6.93845		-3.66	0.791		0.593604	0.123085	0.495632	23.8	0.1056
SDD	113059	9	77411788	G	A	TRPM6	NP_060132.3	ENSP00000354006	P754S	FALSE	0.008	-3.7935	-3.402	-4.185	10.149	-0.162562	0.015	-1.28	0.684	0.713	0.607197	0.233475	0.990162	27.5	0.6524
control	11307.s1	3	50223736	C	T	SEMA3F	NP_004177.3	ENSP00000002829	R590W	TRUE	0.104	-3.47	-3.305	-3.635	6.5293	-6.80153	0	1.93	0.649	0.206	0.6766	-0.0486661	0.996819	26	0.4436
SDD	113074	19	3491662	A	C	DOHH	NP_112594.1	ENSP00000398882	L246R	TRUE	0.180956	-3.826	-4.097	-3.555	13.749	-13.5804	0	0.95	0.781	0.577	0.954552	0.281921	0.999552	29	0.9065
SDD	113083	13	95886999	G	C	ABCC4	NP_001288758.1	ENSP00000494751	N132K	FALSE	0.220268	-2.7215	-3.025	-2.418	-0.47	-2.17517					0.281532	-0.353875	0.0258771	0.514	0.1025
SDD	113083	X	133559253	G	A	PHF6	NP_115834.1	ENSP00000329097	G331R	FALSE	0.261	-4.6665	-4.131	-5.202	7.14789	0.288383	0.07	-2.63	0.554	0.452	0.891089	0.33519	0.858527	32	0.9614
control	11309.s1	11	61557978	C	T	TMEM258	NP_055021.1	ENSP00000443216	A34T	TRUE	0.0466667	-3.3025	-3.48	-3.125	4.379	-0.832553	0.098		0.923	0.252	0.865679	0.309414	0.844202	23.2	0.9506
SDD	113092	3	136667191	C	T	NCK1	NP_006144.1	ENSP00000417273	R344C	FALSE	0.147	-4.002	-3.869	-4.135	10.3824	-7.61635	0	-0.15	0.604	0.517	0.84564	0.336739	0.993089	28.7	0.9949
SDD	11314	3	118647488	T	C	IGSF11	NP_689751.2	ENSP00000406092	M97V	FALSE	0.0332214	-3.443	-3.333	-3.553	4.973	-2.98437	0.007	-0.09	0.729	0.354	0.636599	0.191096	0.69856	24.2	0.2823
SDD	113155	12	132401607	G	T	ULK1	NP_003556.2	ENSP00000324560	A728S	FALSE	0.640238	-2.8725	-2.765	-2.98	6.068	0.738709	0.06	0.57	0.4	0.095	0.643961	-0.0676723	0.783335	33	0.1012
SDD	113155	8	22548279	C	T	EGR3	NP_004421.2	ENSP00000318057	E291K	FALSE	0.007	-5.587	-5.67	-5.504	12.2625	-13.1089	0	3.21	0.283	0.312	0.943695	0.163492	0.975749	28.8	0.9927
SDD	113166	11	65983639	A	G	PACS1	NP_060496.2	ENSP00000316454	N237S	TRUE	0.101	-3.039	-2.918	-3.16	2.33429	-2.00679	0.675	1.94	0.137	0.057	0.628432	-0.318575	0.10879	17.61	0.0539
SDD	113166	2	220155316	T	G	PTPRN	NP_002837.1	ENSP00000295718	I938L	TRUE	0.108	-3.453	-3.168	-3.738	8.54065	-7.77468	0.013	-1.89	0.708	0.823	0.776341	0.220537	0.964811	28.9	0.6827
SDD	113183	3	32411387	C	G	CMTM8	NP_849199.2	ENSP00000307741	F150L	FALSE	0.13	-3.1825	-3.009	-3.356	4.58569	-4.09819	0.135	0.62	0.677	0.332	0.811085	0.10139	0.926093	22.3	0.9488
SDD	113190	10	95385341	G	A	PDE6C	NP_006195.3	ENSP00000360502	D292N	TRUE	0.276	-3.6465	-3.53	-3.763	7.27338	-6.66221	0.075	-0.16	0.683	0.282	0.788301	-0.0949539	0.979425	26.7	0.2388
SDD	113190	12	49230010	G	T	DDX23	NP_004809.2	ENSP00000310723	L426I	TRUE	0	-3.5215	-3.244	-3.799	4.85449	-6.63591	0.003	1.99	0.616	0.227	0.879677	0.0237731	0.903264	24.5	0.3372
SDD	113206	11	64507112	G	A	RASGRP2	NP_722541.1	ENSP00000338864	A231V	FALSE	0.019	-3.7995	-3.881	-3.718	9.08618	-6.00486	0.001	0.09	0.912	0.693	0.767499	0.300837	0.99307	27.5	0.9424
SDD	113206	13	106142296	A	T	DAOA	NP_758958.3	ENSP00000365103	N110Y	FALSE	0.368	-3.279	-3.326	-3.232	0.0493164	-0.266726	0.013	1.63	0.219	0.095	0.327735	-0.196987	0.123676	15.52	0.396
SDD	113222	3	10331498	C	A	GHRL	NP_057446.1	ENSP00000335074	R58L	FALSE	0.003	-2.7655	-2.896	-2.635	2.18462	0.298657	0.053	1.47	0.197	0.021	0.219322	-0.294286	0.274892	0.075	0.0798
SDD	113230	10	3199241	A	G	PITRM1	NP_001229236.1	ENSP00000370377	W455R	FALSE	0.0112084	-3.8955	-4.113	-3.678	9.258	-10.9483	0.001	2.82	0.963	0.752	0.751063	0.272446	0.999657	26.3	0.9889
SDD	113230	6	74072941	A	G	KHDC3L	NP_001017361.1	ENSP00000359392	D98G	FALSE	0	-3.258	-2.926	-3.59	5.62415	-0.859896	0.081	0.99	0.463	0.175	0.539932	-0.0750774	0.93049	23.8	0.7882
SDD	113235	7	140477854	A	G	BRAF	NP_004324.2	ENSP00000493543	L485S	TRUE	0.004	-5.011	-4.987	-5.035	8.53607	-13.3904					0.908248	0.439391	0.997965	29.1	0.9999
control	11324.s1	10	14951129	C	T	DCLRE1C	NP_001029027.1	ENSP00000367527	E453K	TRUE	0.334	-3.441	-3.37	-3.512	5.30103	-2.82681	0.018	1.75	0.415	0.063	0.467841	-0.0780104	0.720013	23.5	0.1717
control	11327.s1	19	39997870	C	G	DLL3	NP_058637.1	ENSP00000205143	R429G	TRUE	0.38	-3.1845	-3.265	-3.104	2.91602	-5.01868	0.508	-2.21	0.258	0.401	0.936884	0.0688822	0.981498	27	0.3813
SDD	11328	2	160245992	T	C	BAZ2B	NP_038478.2	ENSP00000376534	K1027R	FALSE	0.006	-3.448	-3.448		1.83325	-0.904748	0.582	1.59	0.196	0.043	0.837384	-0.195154	0.208332	20.3	0.124
SDD	113294	8	120854153	A	G	DSCC1	NP_076999.2	ENSP00000322180	C269R	FALSE	0.026	-3.5675	-2.87	-4.265	14.7234	1.43911	0	0.55	0.958	0.675	0.786977	0.34566	0.999828	27.2	0.8357
control	11330.s1	11	66082235	G	A	CD248	NP_065137.1	ENSP00000308117	T755I	TRUE	0.567	-3.5895	-3.48	-3.699	5.974	-4.81104	0	-2.85	0.651	0.45	0.764193	0.15216	0.954248	26.3	0.6645
SDD	11330	4	119204018	G	A	PRSS12	NP_003610.2	ENSP00000296498	S763F	TRUE	0.085	-3.177	-3.124	-3.23	4.95422	-5.57987	0.046	-2.51	0.457	0.46	0.369108	-0.0660904	0.725561	26.2	0.1732
SDD	113310	2	26950649	A	G	KCNK3	NP_002237.1	ENSP00000306275	N133S	TRUE	0.004	-4.231	-3.99	-4.472	8.55322	-8.09484	0	2.02	0.753	0.342	0.631369	-0.143108	0.995028	25.7	0.5961
SDD	113327	22	19164689	G	A	SLC25A1	NP_005975.1	ENSP00000215882	P157L	TRUE	0.393	-2.6315	-2.421	-2.842	2.25671	-1.07252	0.15	-1.19	0.243	0.187	0.271879	-0.040624	0.24637	22.4	0.1426
SDD	113339	4	74308041	C	T	AFP	NP_001125.1	ENSP00000379138	P171S	FALSE	0.057	-4.247	-4.129	-4.365	8.30591	-4.2202	0.002	0.08	0.635	0.463	0.409	0.304512	0.994416	23	0.2884
SDD	113342	14	59792391	C	G	DAAM1	NP_055807.1	ENSP00000378557	D333E	TRUE	0.059	-3.4515	-3.288	-3.615	5.4248	-3.87739	0.024	-2.17	0.801	0.57	0.905755	0.125831	0.970125	22.9	0.7629
SDD	113342	9	123313137	C	T	CDK5RAP2	NP_060719.4	ENSP00000343818	R80H	TRUE	0.172	-3.974	-4.249	-3.699	6.55615	-5.13471	0	1.47	0.96	0.496	0.796312	0.22312	0.992252	27.7	0.5226
SDD	113345	10	7621812	C	T	ITIH5	NP_085046.5	ENSP00000380333	V442M	FALSE	0.0101897	-3.5375	-3.535	-3.54	8.656	-5.91643	0.011	-1.37	0.877	0.708	0.709062	0.182542	0.981563	26.4
SDD	113345	16	13010621	C	T	SHISA9	NP_001138676.2	ENSP00000454014	H214Y	FALSE	0.007	-3.543	-3.432	-3.654	7.68182	-3.87078			0.676		0.813267	0.256427	0.866309	23.8	0.762
control	11336.s1	1	241519017	G	T	RGS7	NP_002915.3	ENSP00000355523	N20K	TRUE	0.426	-3.5555	-3.202	-3.909	5.84619	-3.73906	0.057	1.52	0.694	0.081	0.859009	-0.145292	0.985753	24.6	0.9929
control	11337.s1	22	39918091	A	C	ATF4	NP_001666.2	ENSP00000336790	L180F	TRUE	0.003	-2.977	-2.804	-3.15	6.10455	-0.858152	0.007	0.54	0.699	0.416	0.59571	0.0171985	0.970989	25.2	0.22
control	11337.s1	9	138709923	C	T	CAMSAP1	NP_056262.3	ENSP00000374183	D1391N	TRUE	0.327	-3.3065	-3.269	-3.344	6.53174	-0.428065	0.22	2.49	0.536	0.145	0.519758	-0.274059	0.661781	25.2	0.1007
SDD	113379	10	118957138	G	A	KCNK18	NP_862823.1	ENSP00000334650	G47S	TRUE	0.171	-2.95	-3.031	-2.869	1.04639	0.771233	0.57	1.91	0.116	0.068	0.250316	-0.519804	0.00933173	1.548	0.0769
SDD	113379	16	11931658	G	A	RSL1D1	NP_056474.2	ENSP00000460871	P487S	TRUE	0.823	-2.7735	-2.639	-2.908	5.10834	0.58147		0.94	0.214		0.328667	-0.310915	0.0954611	16.22	0.0846
SDD	113379	19	13470509	C	T	CACNA1A	NP_001120693.1	ENSP00000489913	G297R	TRUE	0.609	-4.5595	-4.814	-4.305	8.37988	-7.37914					0.903646	0.571395	0.999816	26.2	0.9872
control	11338.s1	17	25633881	G	T	WSB1	NP_056441.6	ENSP00000262394	M228I	TRUE	0	-3.297	-3.321	-3.273	1.83307	-0.965072	0.376	0.28	0.186	0.046	0.582766	-0.494767	0.03884	18.43	0.121
SDD	113383	13	41706178	C	T	KBTBD6	NP_690867.3	ENSP00000368799	R157Q	FALSE	0.0213415	-3.875	-3.826	-3.924	6.874	-2.65242	0.541	-0.51	0.088	0.347	0.685408	-0.0761461	0.936184	23.2	0.1308
control	11339.s1	3	126071150	C	G	KLF15	NP_054798.1	ENSP00000296233	G206R	TRUE	0.054	-3.1215	-2.942	-3.301	5.1936	-1.53136	0.02	3.23	0.162	0.03	0.404359	-0.259029	0.116843	9.551	0.3798
SDD	113396	16	2225341	C	T	TRAF7	NP_115647.2	ENSP00000318944	R476W	TRUE	0.034	-3.817	-4.186	-3.448	2.80908	-8.83734	0.008	0.95	0.766	0.381	0.869563	0.0825828	0.973258	31	0.3826
SDD	113396	19	55997830	C	T	NAT14	NP_065111.1	ENSP00000205194	P43L	TRUE	0	-2.7255	-2.612	-2.839	0.966766	0.809425	1		0.09	0.137	0.849421	-0.109102	0.514875	16.22	0.2873
control	11341.s1	1	32566110	G	A	TMEM39B	NP_060526.2	ENSP00000338165	V395I	TRUE	0.096	-3.2025	-3.094	-3.311	5.96558	-0.754744	0.35		0.271	0.055	0.536939	-0.221806	0.287424	20.5	0.0808
SDD	113410	9	126783530	A	G	LHX2	NP_004780.3	ENSP00000362717	K294E	FALSE	0.041	-4.905	-5.169	-4.641	12.454	-14.8462	0	-3.79	0.788	0.742	0.868495	0.401509	0.997603	31	0.9997
SDD	113415	21	48068530	C	T	PRMT2	NP_001526.2	ENSP00000380760	A163V	FALSE	0.026	-3.333	-3.289	-3.377	3.51239	-4.62974	0.165	1.98	0.243	0.041	0.426501	-0.351373	0.0362239	14.08	0.136
SDD	113436	4	84222132	G	T	HPSE	NP_001092010.1	ENSP00000308107	P485T	FALSE	0.65	-3.031	-2.901	-3.161	1.48242	-1.21716	0.494	0.98	0.188	0.014	0.340631	-0.45607	0.0419994	14.91	0.0796
SDD	11343	19	36430647	G	A	LRFN3	NP_078785.1	ENSP00000246529	R107Q	FALSE	0.034	-3.166	-2.999	-3.333	4.12207	-1.9298	0.099	0.29	0.167	0.111	0.695522	-0.34896	0.104302	20.7	0.2113
SDD	113449	11	60699513	C	T	TMEM132A	NP_060340.2	ENSP00000005286	R425C	FALSE	0.093	-3.8315	-4.001	-3.662	7.34473	-5.10597	0	2.44	0.613	0.268	0.659614	0.0578047	0.979823	26.2	0.2449
control	11345.s1	12	130941155	C	A	RIMBP2	NP_056162.4	ENSP00000261655	A65S	TRUE	0.223	-2.884	-2.821	-2.947	4.00647	0.613623	0.14	1.87	0.437	0.064	0.378236	-0.185093	0.717797	16.76	0.1099
SDD	113459	12	56115691	G	C	RDH5	NP_002896.2	ENSP00000257895	V177L	TRUE	-1	-2.8965	-3	-2.793	0.963623	-1.81926	0.364	-2.22	0.206	0.23	0.545701	0.00914242	0.127604	18.51	0.3152
SDD	113459	5	139494071	T	C	PURA	NP_005850.1	ENSP00000332706	L102P	TRUE	0.053	-6.149	-6.71	-5.588	5.43454	-11.3872	0.042	1.22	0.766	0.764	0.839578	0.263258	0.991852	31	0.9999
SDD	113462	7	128355588	T	G	GARIN1B	NP_115988.1	ENSP00000326652	N31K	FALSE	0.592	-3.3	-2.982	-3.618	2.32947	0.952795	0.002	3.23	0.347	0.052	0.585716	-0.270433	0.881412	22.5	0.1892
SDD	113466	11	1974030	A	G	MRPL23	NP_066957.3	ENSP00000380466	D81G	FALSE	0.035	-4.251	-4.455	-4.047	5.64288	-8.01058	0.268	2.18	0.359	0.237	0.552171	-0.126329	0.860063	23.3	0.4993
SDD	11346	3	176765132	A	T	TBL1XR1	NP_078941.2	ENSP00000413251	W274R	TRUE	0.002	-6.915	-7.541	-6.289	11.3165	-17.7888	0	-0.23	0.942	0.812	0.962225	0.403734	0.999878	31	1
SDD	11346	X	19725022	C	T	SH3KBP1	NP_114098.1	ENSP00000380921	D123N	FALSE	0.152	-4.284	-4.467	-4.101	6.66681	-6.70512	0.001	-0.04	0.82	0.466	0.838374	-0.0259578	0.99397	25.7	0.5579
control	11348.s1	19	11725441	G	A	ZNF627	NP_660338.1	ENSP00000354414	E35K	TRUE	0.893	-3.827	-3.677	-3.977	9.3717	-5.11443	0.001	3.67	0.615	0.216	0.410657	0.0283901	0.995411	23.7	0.8779
SDD	113481	8	131896887	G	A	ADCY8	NP_001106.1	ENSP00000286355	R678W	FALSE	0.012	-3.743	-3.546	-3.94	10.4199	-4.68702	0.001	-1.25	0.813	0.798	0.915879	0.387381	0.998611	32	0.877
control	11349.s1	19	12244345	C	T	ZNF20	NP_066966.2	ENSP00000335437	R219Q	TRUE	0.043	-3.5475	-3.576	-3.519	1.57874	-3.77308	0.004	1.84	0.144	0.037	0.233371	-0.306377	0.943388	18.83	0.2046
SDD	113494	12	42792711	C	G	PPHLN1	NP_958848.1	ENSP00000449331	T227R	TRUE	0.2218	-2.8265	-3.169	-2.484	2.312	-0.526243	0.098		0.211	0.051	0.32563	-0.188211	0.603848	17.57	0.2227
SDD	113494	17	36091625	G	T	HNF1B	NP_000449.1	ENSP00000480291	H336N	TRUE	0.214	-3.0855	-3.13	-3.041	1.56421	-0.790216			0.461		0.513614	-0.084844	0.528617	22.1	0.0788
SDD	113494	7	92027596	G	T	ANKIB1	NP_061877.1	ENSP00000265742	G868V	TRUE	0.498	-3.8485	-3.827	-3.87	6.18762	-3.85664	0	2.63	0.638	0.341	0.643861	0.0423344	0.988899	24.5	0.2235
SDD	113522	12	106897897	G	A	POLR3B	NP_060552.4	ENSP00000228347	R1046H	TRUE	0.179	-4.3925	-4.222	-4.563	12.8072	-6.76477	0	-2.28	0.899	0.861	0.894572	0.478777	0.9998	32	0.9977
SDD	113524	19	5790209	T	C	DUS3L	NP_064560.2	ENSP00000311977	D79G	TRUE	0.36	-2.924	-2.958	-2.89	3.92511	-0.610604	0.111	2.18	0.12	0.055	0.381089	-0.235994	0.619056	21.6	0.0699
SDD	113524	22	18607027	G	C	TUBA8	NP_061816.1	ENSP00000333326	G111R	TRUE	0.09	-3.61	-3.584	-3.636	10.3155	-10.7372	0	-0.98	0.981	0.856	0.893565	0.42772	0.999621	28.4	0.9966
SDD	11352	1	19243526	T	C	IFFO2	NP_001129737.1	ENSP00000387941	K325R	FALSE	0.043	-2.8315	-2.799	-2.864	-0.227051	-0.574527	1	-1.6	0.216	0.214	0.559479	-0.190823	0.110211	20.7	0.0659
control	11353.s1	19	13910723	G	A	ZSWIM4	NP_075560.2	ENSP00000254323	V115M	TRUE	0.938	-3.538	-3.642	-3.434	7.13794	-5.03121	0.02	0.34	0.704	0.299	0.885677	0.0331666	0.948718	26.9	0.9102
SDD	113530	12	11091394	G	A	TAS2R14	NP_076411.1	ENSP00000441949	S138L	FALSE	0.002	-1.5595	-2.037	-1.082	-3.58661	2.37962	1	1.52	0.08	0.041	0.220142	-0.472868	0.0343062	0.022	0.0745
SDD	113530	4	76581025	C	T	G3BP2	NP_987101.1	ENSP00000352738	E158K	FALSE	0.0512975	-3.365	-3.465	-3.265	2.668	-3.59605	0.011	-1.19	0.51	0.307	0.684623	0.0379506	0.839261	24.6	0.2751
SDD	113539	11	8947553	C	T	C11orf16	NP_065694.2	ENSP00000318999	A221T	FALSE	0.0361111	-3.642	-3.511	-3.773	6.155	-1.97411	0.104	1.76	0.087	0.049		-0.137996	0.957887	23.3	0.2096
control	11355.s1	11	111630612	C	G	PPP2R1B	NP_002707.3	ENSP00000437193	L201F	TRUE	0.057	-3.1395	-3.191	-3.088	3.8428	-2.49063	0.023	0.53	0.818	0.387	0.835198	0.264644	0.998147	24.5	0.4508
SDD	113557	2	166211181	G	C	SCN2A	NP_066287.2	ENSP00000283256	E1133D	TRUE	0.03	-3.408	-3.408		4.28589	-0.570311	0.219	-1.86	0.166	0.421	0.693741	-0.00820544	0.756139	33	0.1406
SDD	11355	4	154318387	T	A	MND1	NP_115493.1	ENSP00000240488	L123Q	FALSE	0.027	-3.74	-3.928	-3.552	6.24924	-8.37165	0.007		0.657	0.176	0.45422	0.0926404	0.98777	25.5	0.1359
control	11356.s1	19	46387957	G	A	IRF2BP1	NP_056464.1	ENSP00000307265	P359L	TRUE	0.281629	-3.304	-3.228	-3.38	5.456	-0.736537	0.418	0.96	0.217	0.084	0.815808	-0.167178	0.151278	22.3	0.097
control	11356.s1	1	35365700	G	A	DLGAP3	NP_001073887.1	ENSP00000362444	R428C	TRUE	0.012	-3.445	-3.231	-3.659	5.97278	-2.94147	0	-2.52	0.675	0.584	0.566392	0.148981	0.860283	30	0.2331
control	11356.s1	2	120003136	G	T	STEAP3	NP_001008410.1	ENSP00000376818	A22S	TRUE	0.505	-2.7195	-2.811	-2.628	-1.24762	0.172801	0.21	3.2	0.155	0.045	0.359564	-0.310824	0.144823	7.942	0.0765
control	11356.s1	3	47887994	G	A	DHX30	NP_619520.1	ENSP00000405620	E478K	TRUE	0.132133	-3.427	-3.699	-3.155	1.429	-1.21726	0.442	2.48	0.346	0.057	0.680484	-0.18674	0.291859	22.6	0.179
SDD	113560	15	31862259	T	C	OTUD7A	NP_570971.1	ENSP00000453883	E98G	TRUE	0.231	-2.415	-2.511	-2.319	-0.243774	-1.13435	0.308				0.57706	-0.18731	0.654582	23.1	0.102
SDD	113584	20	1286144	G	C	SNPH	NP_055538.2	ENSP00000371297	E311Q	FALSE	0.0440199	-3.48	-3.116	-3.844	11.444	-0.633289	0.003		0.245	0.422	0.527219	0.0656234	0.911099	25.5	0.4566
control	11364.s1	7	77265144	G	A	PTPN12	NP_002826.3	ENSP00000248594	R707Q	TRUE	0.504	-2.9535	-3.176	-2.731	-4.14807	0.395615	0.337	3.86	0.073	0.021	0.183225	-0.621795	0.0100577	8.427	0.0556
control	11366.s1	18	47390551	A	G	MYO5B	NP_001073936.1	ENSP00000285039	I1268T	TRUE	0.600424	-3.335	-3.273	-3.397	6.049	-1.99501	0.003	2.05	0.774	0.372	0.721764	0.197488	0.972776	27.2	0.7642
SDD	113664	1	63876924	A	G	ALG6	NP_037471.2	ENSP00000263440	Q201R	TRUE	0.014	-4.226	-4.305	-4.147	14.9362	-12.9027				0.916	0.759671	0.477421	0.998283	29.1	0.9091
SDD	113679	11	100168360	C	T	CNTN5	NP_055176.1	ENSP00000435637	P773L	FALSE	0.047	-3.794	-3.916	-3.672	7.97778	-8.17176	0	0.03	0.934	0.495	0.784265	0.343111	0.998122	23.9	0.683
SDD	11367	16	23692274	A	G	PLK1	NP_005021.2	ENSP00000300093	E206G	FALSE	0.0107324	-3.894	-3.946	-3.842	7.026	-5.22882	0.001	-0.22	0.741	0.576	0.755402	0.201613	0.999072	33	0.873
SDD	11367	2	219903193	G	T	CFAP65	NP_919278.2	ENSP00000340776	N87K	FALSE	0.827	-3.3525	-3.247	-3.458	6.32983	-0.268589	0.029	1.58	0.26	0.055	0.381272	-0.298865	0.130094	13.65	0.1847
SDD	11367	3	183369038	G	A	KLHL24	NP_060114.2	ENSP00000242810	M298I	FALSE	0.127	-2.9365	-2.962	-2.911	0.178467	0.388342	0.805	-0.29	0.694	0.262	0.903376	0.0275172	0.338971	21.4	0.5472
SDD	113682	16	20331787	T	C	GP2	NP_001493.2	ENSP00000304044	S219G	FALSE	0.038	-3.286	-3.063	-3.509	6.60016	-0.68114	0.244	-6.19	0.211	0.334	0.332888	0.0303464	0.217811	14.32	0.0806
SDD	113682	17	74382326	T	G	SPHK1	NP_892010.2	ENSP00000313681	L149R	FALSE	0.038	-3.177	-3.157	-3.197	8.16608	-6.54229	0.002	1.53	0.913	0.292	0.582101	0.187595	0.968811	27.1	0.1331
SDD	113722	2	241702670	G	A	KIF1A	NP_004312.2	ENSP00000497030	T612M	TRUE	0.327	-3.338	-3.41	-3.266	3.34204	-1.70334					0.85064	-0.104113	0.271168	21.6	0.3497
SDD	113728	12	57033918	T	C	ATP5F1B	NP_001677.2	ENSP00000262030	H378R	FALSE	0.016	-5.09	-4.499	-5.681	12.0566	-12.748	0	-1.26	0.895	0.893	0.908423	0.435315	0.998399	25.9	0.9972
SDD	113732	9	103072660	G	A	TEX10	NP_060216.2	ENSP00000364037	A735V	FALSE	0.176	-3.2465	-3.595	-2.898	0.527344	-0.876894	0.965		0.103	0.038	0.277304	-0.179802	0.879634	22.1	0.0982
SDD	113735	17	38244602	T	G	THRA	NP_955366.1	ENSP00000395641	S277R	TRUE	0.029	-3.9075	-4.081	-3.734	3.79483	-8.06004	0.007	-4.29	0.607	0.657	0.817414	0.158672	0.874545	14.94	0.9789
control	11374.s1	10	121201577	G	A	GRK5	NP_005299.1	ENSP00000376609	R345Q	TRUE	0.0119704	-3.668	-3.497	-3.839	7.898	-8.20146	0.008	1.84	0.638	0.414	0.813902	0.148545	0.997865	33	0.9251
SDD	113740	12	116434991	C	T	MED13L	NP_056150.1	ENSP00000281928	E872K	TRUE	0.112374	-4.2735	-3.759	-4.788	14.608	-0.459136	0.002	-1.89	0.724	0.821	0.87498	0.400217	0.97249	27.6	0.9851
SDD	113763	6	39846242	G	C	DAAM2	NP_001188356.1	ENSP00000274867	E475Q	FALSE	0.343719	-3.0285	-3.041	-3.016	5.139	-3.51214	0.003	-2.57	0.653	0.506	0.737889	0.176852	0.982263	26.7	0.5484
control	11378.s1	15	35045253	C	T	GJD2	NP_065711.1	ENSP00000290374	G131E	TRUE	0.469	-3.3455	-3.676	-3.015	0.54541	-3.09697	1	-4.55	0.327	0.386	0.486431	0.139476	0.295309	13.6	0.1341
control	11378.s1	15	40660654	G	A	DISP2	NP_277045.1	ENSP00000267889	V781M	TRUE	0.0128205	-3.2785	-3.416	-3.141	3.818	-1.52156	0.026	2.57	0.136	0.052	0.423212	-0.254211	0.309416	22.2	0.1063
control	11378.s1	17	33747329	G	T	SLFN12	NP_001275938.1	ENSP00000394903	L371I	TRUE	0.223	-3.069	-3.369	-2.769	1.11609	-1.14837	0.269	3.83	0.166	0.027	0.331832	-0.398915	0.0936261	0.001	0.0777
SDD	113802	19	52715973	A	G	PPP2R1A	NP_055040.2	ENSP00000324804	M180V	TRUE	0.066	-4.202	-4.021	-4.383	10.6714	-3.98608	0.014	3.39	0.678	0.342	0.775784	0.0918982	0.99463	23.4	0.996
SDD	113802	20	35125428	G	A	DLGAP4	NP_055717.2	ENSP00000363023	E657K	TRUE	0.082	-3.3075	-3.214	-3.401	4.03076	-0.695712	0.13	1.26	0.642	0.071	0.681683	-0.217633	0.219967	23.7	0.1045
SDD	113809	13	37678766	C	T	CSNK1A1L	NP_660204.2	ENSP00000369126	V210I	FALSE	0.02	-3.0885	-2.987	-3.19	4.70148	-2.42288	0.012	3.31	0.232	0.123	0.355487	-0.311492	0.73939	22.8	0.0971
control	11381.s1	19	49106945	G	T	FAM83E	NP_060178.2	ENSP00000263266	P328T	TRUE	0.153349	-2.6925	-2.891	-2.494	1.815	-1.62141	0.003	2.91	0.198	0.039	0.675191	-0.251504	0.116097	10.5	0.0743
control	11381.s1	2	210962818	A	C	KANSL1L	NP_689732.2	ENSP00000281772	I514M	TRUE	0.032	-3.6635	-3.525	-3.802	5.01001	-1.02249	0.003		0.574	0.087	0.53138	-0.0135444	0.874489	24.3	0.1237
control	11381.s1	3	130447391	C	T	PIK3R4	NP_055417.1	ENSP00000349205	D575N	TRUE	0.002	-3.8085	-3.598	-4.019	6.30908	-0.958881	0.002	0.84	0.688	0.412	0.874305	-0.135446	0.986606	26.8	0.9866
control	11382.s1	1	43665169	G	A	CFAP57	NP_689711.2	ENSP00000435310	G513R	TRUE	0.042	-3.6955	-3.631	-3.76	6.06653	-2.24937	0.003	1.99	0.683	0.51	0.681194	0.0995675	0.994206	29.4	0.6636
control	11383.s1	2	112944908	G	A	FBLN7	NP_694946.2	ENSP00000331411	G382D	TRUE	0.149	-3.2975	-3.244	-3.351	5.70728	-5.8035	0.179	1.01	0.906	0.64	0.731453	0.241525	0.983367	28	0.7239
SDD	113848	1	1720516	C	T	GNB1	NP_002065.1	ENSP00000367872	D298N	TRUE	0.031	-3.9605	-3.991	-3.93	5.60083	-7.82273	0.001	-0.3	0.922	0.624	0.898449	0.0389399	0.993382	26.1	0.9861
SDD	113851	11	64504446	G	A	RASGRP2	NP_722541.1	ENSP00000338864	R292W	FALSE	0.004	-3.643	-3.719	-3.567	7.13562	-5.25314	0.005	1.48	0.559	0.188	0.654409	-0.296182	0.266032	25.2	0.2171
SDD	113872	20	21492764	C	G	NKX2-2	NP_002500.1	ENSP00000366347	V207L	FALSE	0.109	-3.3745	-3.529	-3.22	5.50223	-7.60752	0.008	-3.2	0.71	0.608	0.762403	0.191673	0.991703	24.3	0.9719
SDD	113872	8	1616807	A	T	DLGAP2	NP_001333739.1	ENSP00000489774	E708V	FALSE	0.163559	-2.7715	-2.744	-2.799	5.78	-2.10486					0.350565	-0.156557	0.767708	22.8
SDD	11387	9	124521181	C	T	DAB2IP	NP_115941.2	ENSP00000259371	T146M	FALSE	0.128612	-3.6035	-3.455	-3.752	7.354	-5.08987	0.002	-3.28	0.836	0.73	0.84184	0.035965	0.295553	25.5
control	11388.s1	17	60663504	T	G	TLK2	NP_006843.2	ENSP00000275780	D459E	TRUE	0.002	-5.3575	-5.21	-5.505	11.915	-11.2631	0	1.87	0.737	0.135	0.9016	-0.0832741	0.982134	21.5	0.9983
control	11388.s1	9	100194388	G	A	TDRD7	NP_055105.2	ENSP00000347444	R144K	TRUE	0.334	-3.305	-3.027	-3.583	3.34814	0.643271	0.641	2.59	0.12	0.111	0.423838	-0.23019	0.218607	21.5	0.079
SDD	113884	19	47349375	G	A	AP2S1	NP_004060.2	ENSP00000263270	R10W	TRUE	0.164	-5.4135	-5.506	-5.321	9.46725	-7.92639	0		0.784	0.471	0.935179	0.297472	0.996116	32	0.9942
SDD	113892	20	62642825	G	T	PRPF6	NP_036601.2	ENSP00000266079	G498V	FALSE	0.027	-3.6265	-3.618	-3.635	5.1925	-6.37405	0.087	1.4	0.792	0.45	0.886729	0.264149	0.986529	22.9	0.8413
SDD	113895	2	207012328	C	A	NDUFS1	NP_004997.4	ENSP00000233190	V160L	TRUE	0.143	-3.451	-3.462	-3.44	6.96387	-8.29353	0.014	-1.87	0.764	0.677	0.737551	0.225681	0.956593	25.2	0.8376
SDD	113898	12	132633397	G	C	NOC4L	NP_076983.1	ENSP00000328854	Q286H	FALSE	0.001	-2.613	-2.613			-0.396905	0.04	1.37	0.54	0.174	0.446249	-0.0664728	0.160566	18.86	0.1857
control	11390.s1	19	2043578	T	A	MKNK2	NP_951009.1	ENSP00000250896	I115F	TRUE	0.050233	-3.257	-3.286	-3.228	6.262	-10.1655	0.001	0.91	0.867	0.498	0.631834	0.168828	0.981267	28.6	0.8495
SDD	113910	12	63195696	G	C	PPM1H	NP_065751.1	ENSP00000228705	P219R	FALSE	0.425	-3.0015	-2.745	-3.258	5.24365	-2.93574	0.032	1.94	0.701	0.183	0.779933	0.070388	0.910566	24.2	0.6581
SDD	113910	6	138539481	G	C	PBOV1	NP_067648.1	ENSP00000432353	H18D	FALSE	0.056	-3.586	-3.563	-3.609	0.280457	-0.0661273		1.03	0.509	0.146	0.462949	-0.160562	0.331055	17.69	0.3659
SDD	113914	1	62740535	G	A	KANK4	NP_859063.3	ENSP00000360195	R81C	FALSE	0.223	-3.286	-3.153	-3.419	6.8446	-1.79772	0.067	-1.13	0.247	0.317	0.365406	-0.0172689	0.879895	22.4	0.116
SDD	11391	20	44680392	G	A	SLC12A5	NP_001128243.1	ENSP00000387694	V777M	TRUE	-1	-3.163	-3.209	-3.117	1.1333	-2.23051	0.499	-3.78	0.235	0.281	0.56127	-0.110177	0.0550486	19.44	0.0619
SDD	113927	6	25770514	C	A	SLC17A4	NP_001273050.1	ENSP00000391345	Q119K	FALSE	0.0639258	-3.7355	-3.817	-3.654	6.241	-5.60245			0.612		0.349279	0.0515538	0.977939	24.6	0.5838
SDD	113933	19	36335085	C	A	NPHS1	NP_004637.1	ENSP00000368190	R711L	TRUE	0.01	-3.5025	-3.426	-3.579	5.92822	-3.3274	0.032	-0.58	0.541	0.455	0.607994	0.0720295	0.993034	24.5	0.2926
SDD	113936	1	57378148	C	T	C8A	NP_000553.1	ENSP00000354458	R485C	FALSE	0.062	-3.5775	-3.705	-3.45	8.12915	-9.175	0.001	-2.02	0.531	0.389	0.215908	-0.104766	0.694776	22	0.3333
control	11395.s1	13	27239287	A	G	WASF3	NP_006637.2	ENSP00000335055	T86A	TRUE	0.074	-3.152	-3.05	-3.254	6.73633	-5.1817	0.034	-0.21	0.628	0.291	0.840312	-0.101225	0.263221	23.9	0.3928
SDD	113951	17	8926171	A	T	NTN1	NP_004813.2	ENSP00000173229	I161F	FALSE	0.014	-3.46	-3.411	-3.509	7.51764	-8.76415	0.033	-1.59	0.934	0.896	0.807048	0.417413	0.992246	25.5	0.8769
control	11396.s1	3	121137231	A	G	STXBP5L	NP_055795.1	ENSP00000273666	I1116V	TRUE	0.607	-3.2575	-2.816	-3.699	6.16797	-0.128456	0.026	1.51	0.53	0.168	0.741667	-0.056269	0.853541	23	0.4374
SDD	113968	14	23524543	C	T	CDH24	NP_071923.2	ENSP00000380517	R74Q	FALSE	0.237688	-2.968	-2.887	-3.049	4.748	-0.727998	0.084	0.72	0.315	0.216	0.5029	-0.339335	0.24111	23.9	0.1556
SDD	113968	2	242265484	G	A	SEPTIN2	NP_001269901.1	ENSP00000479861	R64Q	FALSE	0.124	-3.55	-3.48	-3.62	4.59827	-7.18003			0.686		0.868236	0.178126	0.998521	32	0.9932
SDD	113968	5	149584465	T	C	SLC6A7	NP_055043.2	ENSP00000230671	L503P	FALSE	0.139	-3.3305	-3.502	-3.159	3.60327	-5.58235	0.218	-0.91	0.861	0.5	0.631885	-0.0677079	0.435768	23	0.8525
control	11397.s1	12	41410611	A	T	CNTN1	NP_001834.2	ENSP00000447006	D771V	TRUE	0.049	-3.7395	-3.746	-3.733	5.3374	-4.38069	0	0.8	0.901	0.316	0.591024	0.258305	0.996402	24.5	0.5889
control	11397.s1	1	220330797	C	G	RAB3GAP2	NP_036546.2	ENSP00000351832	V1124L	TRUE	0.122	-2.9985	-3.21	-2.787	-0.271851	0.670172	0.287	1.51	0.129	0.04	0.344184	-0.270699	0.188188	12.5	0.0882
SDD	113977	16	68265185	C	T	ESRP2	NP_079215.2	ENSP00000418748	R536H	TRUE	0.038	-3.639	-3.683	-3.595	7.79968	-7.70679	0	2.66	0.836	0.664	0.636345	0.271882	0.999007	27.1	0.8431
SDD	113977	8	133192493	G	A	KCNQ3	NP_004510.1	ENSP00000373648	R230C	TRUE	0.017	-4.6055	-4.842	-4.369	8.35919	-12.8139	0	-5.03	0.952	0.96	0.933053	0.567045	0.999905	32	0.9656
SDD	113987	5	33461042	A	C	TARS1	NP_001245367.1	ENSP00000387710	E462A	TRUE	0	-3.6965	-3.782	-3.611	9.07446	-9.78777	0.001	-0.41	0.918	0.691	0.720329	0.380233	0.998325	29.4	0.9501
SDD	113991	16	28507815	A	G	APOBR	NP_061160.3	ENSP00000457539	M485V	FALSE	0	-2.4615	-2.807	-2.116	-2.85645	1.05648	0.015	0.29	0.055		0.225106	-0.307788	0.0658218	1.542	0.0925
SDD	113991	19	32844641	T	A	ZNF507	NP_001129628.1	ENSP00000348162	V302D	FALSE	0.021	-3.224	-3.002	-3.446	3.04663	0.708174	0.023	3.66	0.546	0.099	0.46251	-0.10263	0.389425	17.5	0.3429
SDD	11399	19	6230599	C	G	MLLT1	NP_005925.2	ENSP00000252674	K134N	FALSE	0.096	-4.18	-4.055	-4.305	8.99976	-7.28411	0.001		0.702	0.316	0.673644	0.0463089	0.991234	26.5	0.9729
control	11400.s1	9	35616069	C	A	CD72	NP_001773.1	ENSP00000259633	A187S	TRUE	0	-3.3915	-3.263	-3.52	3.58124	-0.754541	0.24	0.55	0.102	0.084	0.236678	-0.460501	0.0594359	2.714	0.0944
SDD	114042	18	48604676	A	G	SMAD4	NP_005350.1	ENSP00000341551	I500V	TRUE	0.222	-4.0445	-3.661	-4.428	5.92767	-5.08414	0.041	-5.1	0.718	0.71	0.863077	0.362928	0.712918	23.9	0.6162
SDD	114042	3	96533746	A	C	EPHA6	NP_001073917.2	ENSP00000374323	R93S	TRUE	0.976	-2.792	-2.792		2.93604	-0.720792	0.002	-0.96	0.355	0.046	0.491519	-0.12682	0.172898	17.96
SDD	114104	13	99947817	A	G	GPR183	NP_004942.1	ENSP00000365596	W195R	FALSE	0.0533054	-3.0935	-2.92	-3.267	3.612	0.12898	0.123	1.22	0.405	0.156	0.422628	-0.0237419	0.673331	24.5	0.5479
control	11411.s1	1	114454397	C	T	DCLRE1B	NP_073747.1	ENSP00000498042	R395W	TRUE	0.75	-3.004	-3.099	-2.909	3.14832	-1.7415					0.182433	-0.322538	0.0902888	12.01	0.07
SDD	114114	12	110777148	G	A	ATP2A2	NP_001672.1	ENSP00000311186	M494I	FALSE	0	-4.5445	-4.351	-4.738	8.40173	-7.4431	0	-2.2	0.855	0.93	0.880686	0.477162	0.999142	28.2	0.9993
SDD	114114	17	79872031	A	C	SIRT7	NP_057622.1	ENSP00000329466	Y277D	FALSE	0.0272206	-3.977	-4.446	-3.508	8.711	-13.3845	0	2.23	0.866	0.557	0.797896	0.258692	0.999839	28.8	0.9877
SDD	114114	1	33430022	C	T	RNF19B	NP_699172.2	ENSP00000362555	E89K	FALSE	0.592	-2.77	-2.906	-2.634	0.86499	-3.93468	0.237	1.52	0.115	0.027	0.927064	-0.357076	0.0933864	9.921	0.1524
control	11412.s1	16	19702791	G	A	VPS35L	NP_064710.5	ENSP00000395973	E882K	TRUE	0.218997	-3.2095	-3.405	-3.014	3.702	-8.38712			0.624	0.132		-0.0682264	0.856084	24.9	0.2176
SDD	11412	4	982910	G	A	SLC26A1	NP_998778.1	ENSP00000354721	A606V	FALSE	0.718	-2.5515	-2.549	-2.554	2.04456	-2.12799	0.26	-2.36	0.09	0.136	0.521923	-0.352497	0.0121694	4.242	0.0925
control	11413.s1	22	32804767	T	A	RTCB	NP_055121.1	ENSP00000216038	E49D	TRUE	0.956	-3.5505	-3.025	-4.076	10.479	-4.21333	0.568	1.59	0.654	0.273	0.83755	0.0114412	0.993088	21.5	0.9437
control	11413.s1	9	100888938	C	G	CORO2A	NP_003380.3	ENSP00000343746	E447Q	TRUE	0.363	-3.117	-3.155	-3.079	0.757996	-1.07749	0.293	-0.66	0.282	0.133	0.302107	-0.153326	0.287567	14.54	0.0905
SDD	114133	16	19078996	G	A	COQ7	NP_057222.2	ENSP00000322316	A4T	FALSE	0.989	-2.3475	-2.589	-2.106	-3.08905	-1.93253	0.009	0.76	0.277	0.031	0.578878	-0.107202	0.388506	9.531	0.1399
control	11414.s1	17	5347818	C	A	DHX33	NP_064547.2	ENSP00000225296	A611S	TRUE	0.379	-2.5775	-2.555	-2.6	-1.02759	0.763609	0.385	4.23	0.075	0.022	0.238837	-0.293985	0.100092	0.001	0.0725
control	11414.s1	3	9965655	A	G	IL17RC	NP_703191.2	ENSP00000295981	Y309C	TRUE	0.0639098	-3.2225	-3.203	-3.242	6.622	-2.2515	0.001	2.46	0.807	0.255	0.54056	0.131833	0.995025	24.9	0.6546
control	11416.s1	16	28145164	G	C	XPO6	NP_055986.1	ENSP00000302790	L512V	TRUE	0.013	-3.454	-3.609	-3.299	4.26941	-0.598073	0.077	-0.48	0.811	0.194	0.823075	0.0895292	0.853364	22.8	0.1265
control	11419.s1	1	35900589	C	T	KIAA0319L	NP_079150.3	ENSP00000318406	R1019Q	TRUE	0.188	-3.39	-3.141	-3.639	5.07275	-0.306587	0.121	3.12	0.102	0.079	0.375303	-0.223463	0.917093	22.7	0.103
SDD	114194	2	61720091	G	T	XPO1	NP_003391.1	ENSP00000384863	T448K	FALSE	0.034	-6.2095	-6.473	-5.946	15.2312	-6.83527	0.002	-0.3	0.752	0.68	0.894171	0.366981	0.993634	27.4	0.9925
SDD	114194	3	15478028	G	A	EAF1	NP_149074.3	ENSP00000380054	V236I	FALSE	0.182	-2.9835	-3.002	-2.965	2.7298	-1.8059	0.439		0.146	0.012	0.243792	-0.415673	0.00754267	0.41	0.0621
SDD	1141	19	52627285	C	A	ZNF616	NP_848618.2	ENSP00000471000	K10N	FALSE	0.273525	-3.135	-2.993	-3.277	3.183	-3.549		4.36	0.214		0.267403	-0.291477	0.423438	14.93	0.4097
control	11420.s1	1	44056718	G	A	PTPRF	NP_002831.2	ENSP00000353030	G342E	TRUE	0.253	-3.6095	-3.745	-3.474	5.68457	-6.46346	0.01	0.59	0.735	0.504	0.845792	0.203266	0.995903	28.5	0.35
SDD	114201	4	140262126	G	A	NAA15	NP_476516.1	ENSP00000296543	C102Y	TRUE	0.088	-4.72	-4.98	-4.46	8.0011	-11.9395	0	-2.23	0.815	0.684	0.962804	0.190846	0.998429	28	0.9996
SDD	114211	11	70332268	G	A	SHANK2	NP_573573.2	ENSP00000345193	A789V	TRUE	0.110751	-3.0645	-3.312	-2.817	2.298	-0.505668			0.485	0.046	0.534188	-0.188137	0.464184	17.77	0.1347
SDD	114211	13	50092154	A	C	PHF11	NP_001035533.1	ENSP00000367570	K109Q	TRUE	0.006628	-3.965	-3.699	-4.231	10.064	-3.24537	0.047	-0.01	0.299	0.288	0.378083	-0.0414016	0.81876	24.1	0.2934
SDD	11421	22	37268381	T	A	NCF4	NP_038202.2	ENSP00000380334	F181I	FALSE	0.026	-3.798	-3.972	-3.624	7.0329	-10.1921	0.001	0.12	0.909	0.673	0.803477	0.360433	0.999202	28	0.9278
control	11424.s1	12	64519856	G	A	SRGAP1	NP_065813.1	ENSP00000347198	R775H	TRUE	0.136	-3.7895	-3.692	-3.887	8.2439	-7.36993	0.001	0.76	0.767	0.43	0.847862	0.000486439	0.977676	29.9	0.5226
control	11429.s1	1	154407519	C	T	IL6R	NP_000556.1	ENSP00000357470	R232C	TRUE	0	-3.966	-4.15	-3.782	7.36707	-7.08157	0.001	2.18	0.336	0.182	0.246472	-0.0544625	0.882306	23.9	0.2834
SDD	114297	2	166165885	T	G	SCN2A	NP_066287.2	ENSP00000283256	L210R	TRUE	0.318	-5.409	-5.409		7.91089	-10.5307	0	-4.51	0.831	0.941		0.567994	0.988234	21.8	0.9749
SDD	114308	19	46288935	T	G	DMWD	NP_004934.1	ENSP00000270223	T607P	FALSE	0.178	-4.048	-4.352	-3.744	9.03565	-10.2693	0.001	-1.78	0.725	0.815	0.704721	0.280843	0.989302	24.6	0.9843
control	11431.s1	11	47372089	C	T	MYBPC3	NP_000247.2	ENSP00000442795	A124T	TRUE	0.477	-3.0955	-3.154	-3.037	1.3811	-1.86585	0.522	0.29	0.162	0.014	0.537974	-0.170577	0.114693	6.944	0.1223
SDD	114312	12	56712174	G	A	PAN2	NP_001159751.2	ENSP00000257931	R1140C	TRUE	0.378	-3.7865	-4.218	-3.355	2.03027	-4.30294	0.034	1.77	0.833	0.409	0.87208	0.229465	0.974712	29.5	0.2997
control	11433.s1	1	212532095	G	A	PPP2R5A	NP_006234.1	ENSP00000261461	D432N	TRUE	0.134	-3.568	-3.65	-3.486	2.1933	-5.83781	0.001		0.252	0.135	0.762551	-0.120515	0.907539	26.5	0.1467
control	11433.s1	20	2842706	G	A	VPS16	NP_072097.2	ENSP00000369810	S334N	TRUE	0.039	-3.2875	-3.276	-3.299	5.8064	-2.80852	0.183	0.87	0.57	0.098	0.575402	-0.151247	0.867082	22.5	0.4925
SDD	114346	22	28196422	G	A	MN1	NP_002421.3	ENSP00000304956	P37L	TRUE	0.12	-3.496	-3.467	-3.525	6.25464	-1.99795	0.005	-0.24	0.654	0.41	0.780996	0.149047	0.987572	24.9	0.3969
SDD	114352	6	26216498	G	A	H2BC8	NP_003509.1	ENSP00000445633	S125F	FALSE	0.363	-2.7715	-2.268	-3.275	7.9062	-8.23735			0.588		0.732411	0.131459	0.996186	25.4
SDD	114358	8	89086923	G	A	MMP16	NP_005932.2	ENSP00000286614	P378S	FALSE	0.023	-4.4605	-4.501	-4.42	7.65588	-8.71994	0.001	3.43	0.897	0.425	0.821417	0.255263	0.998932	27.1	0.9977
SDD	11435	6	160662590	T	C	SLC22A2	NP_003049.2	ENSP00000355920	M473V	FALSE	0.0808377	-2.86	-2.886	-2.834	2.664	-2.50724	0.247	0.42	0.227	0.097	0.344551	-0.471067	0.0181211	14.94	0.0955
control	11436.s1	19	42503146	C	G	GRIK5	NP_002079.3	ENSP00000470251	Q940H	TRUE	-1	-2.832	-2.832			-0.522806		2.48	0.396		0.952838	-0.139587	0.885098	19.08	0.4596
SDD	114361	2	239264645	G	A	TRAF3IP1	NP_056465.2	ENSP00000362424	G538D	FALSE	0.471	-3.4825	-3.265	-3.7	9.82849	-2.46166	0	-0.8	0.874	0.782	0.677989	0.390396	0.998916	33	0.9902
control	11437.s1	12	49073591	G	A	KANSL2	NP_060292.3	ENSP00000415436	R93C	TRUE	0.048	-3.9225	-4.097	-3.748	6.77618	-8.48876	0	-1.08	0.9	0.688	0.763227	0.404122	0.983539	33	0.155
control	11437.s1	7	21946025	C	T	CDCA7L	NP_061189.2	ENSP00000383986	R268H	TRUE	0.003	-3.38	-3.225	-3.535	11.105	-3.22774	0.001	0.24	0.516	0.331	0.465928	0.227242	0.980083	26.3	0.6372
SDD	114373	5	39383003	C	T	DAB2	NP_001334.2	ENSP00000313391	R353Q	FALSE	0.003	-3.208	-2.973	-3.443	3.19202	0.341359	0.007	1.05	0.682	0.109	0.518682	-0.0949296	0.647731	24.1	0.1296
SDD	11437	22	36684874	G	A	MYH9	NP_002464.1	ENSP00000216181	R1557W	TRUE	0.137	-4.58	-5.203	-3.957	7.39746	-10.8029	0	-1.91	0.908	0.851	0.863636	0.444065	0.999431	26.7	0.9459
control	11441.s1	2	190728897	T	C	PMS1	NP_000525.1	ENSP00000406490	L762P	TRUE	0.191	-3.8105	-3.928	-3.693	8.24829	-9.928	0.001	1.76	0.765	0.488	0.496163	0.383569	0.993246	24.5	0.9238
control	11444.s1	19	1388884	C	T	NDUFS7	NP_077718.3	ENSP00000233627	R59W	TRUE	0.406	-2.876	-2.851	-2.901	2.85075	-5.91689	0.113	-0.12	0.541	0.203	0.474202	0.0248689	0.437541	24.7	0.1173
control	11444.s1	4	146601538	G	A	C4orf51	NP_001074000.1	ENSP00000391404	M61I	TRUE	0.04	-3.1985	-3.34	-3.057	-0.0570374	1.18053	0.022		0.196	0.068		-0.267868	0.10743	0.005	0.2052
SDD	11448	4	659081	G	T	PDE6B	NP_000274.3	ENSP00000420295	G744V	FALSE	0.081	-3.9375	-4.329	-3.546	10.3302	-12.7378	0	-2.16	0.991	0.913	0.795169	0.482067	0.999607	28.5	0.9994
SDD	114522	X	48385643	C	T	EBP	NP_006570.1	ENSP00000417052	R147C	FALSE	0.02	-4.7195	-5.074	-4.365	7.93034	-7.47791	0	-4.86	0.879	0.888	0.427545	0.665866	0.999384	24.2	0.2907
control	11453.s1	12	6788667	T	C	ZNF384	NP_001129206.1	ENSP00000380019	N7S	TRUE	0.167	-3.2985	-2.718	-3.879	6.70361	-5.89897	0.097	2.34	0.453	0.152	0.670979	-0.319398	0.662891	23.2	0.0821
control	11453.s1	15	65945118	G	A	SLC24A1	NP_004718.1	ENSP00000261892	G1008S	TRUE	0.414	-3.969	-4.227	-3.711	6.85803	-12.6015	0.001	-2.28	0.851	0.927	0.809072	0.397231	0.998982	29.5	0.9752
SDD	114531	5	148727843	C	G	GRPEL2	NP_689620.2	ENSP00000329558	P29R	FALSE	0.54	-2.78	-2.687	-2.873	1.78461	0.7939	0.065		0.249	0.075	0.286945	-0.19287	0.125185	7.909	0.0776
SDD	114546	14	81297615	G	C	CEP128	NP_689659.2	ENSP00000451162	L361V	FALSE	0.305	-3.795	-3.797	-3.793	7.01831	-4.01351	0.009	-1.92	0.358	0.381	0.379805	0.0169319	0.553799	22.8	0.0916
SDD	11454	9	136234243	G	C	SURF4	NP_001267718.1	ENSP00000419853	R43G	FALSE	0.049	-3.8705	-3.6	-4.141	8.3226	-0.753642	0.002		0.961	0.969	0.791145	0.492401	0.994601	32	0.9952
control	11455.s1	18	74091158	G	A	ZNF516	NP_055458.1	ENSP00000394757	P971L	TRUE	0.375854	-2.6535	-2.73	-2.577	4.099	0.761132	0.002	3.06	0.135	0.056	0.582866	-0.495191	0.0839055	18.71	0.0909
SDD	114556	16	67654664	G	A	CTCF	NP_006556.1	ENSP00000264010	C384Y	TRUE	0.006	-5.633	-5.482	-5.784	9.80652	-15.0425	0	-2.04	0.967	0.834	0.958969	0.470766	0.99945	29.5	0.9999
control	11457.s1	12	133197699	C	T	P2RX2	NP_777362.1	ENSP00000345095	S296L	TRUE	0.14	-3.333	-3.25	-3.416	7.37039	-2.92494	0.001	3.52	0.515	0.162	0.465327	-0.229732	0.884894	28.3	0.3992
control	11457.s1	14	23244691	C	T	SLC7A7	NP_001119578.1	ENSP00000285850	V353I	TRUE	0.016	-2.847	-2.864	-2.83	1.14337	-1.0432	0.618	-2.67	0.117	0.194	0.53089	-0.0240398	0.260441	17.17	0.0885
control	11457.s1	8	120772889	A	G	TAF2	NP_003175.2	ENSP00000367406	F883S	TRUE	0.068	-3.718	-3.301	-4.135	6.49915	0.532162	0.042	1.67	0.94	0.443	0.743697	0.27772	0.983091	25.5	0.9868
SDD	114572	14	24620802	C	T	RNF31	NP_060469.4	ENSP00000315112	R616C	TRUE	0.025	-3.5415	-3.549	-3.534	4.23267	-1.84908	0.02	0.9	0.541	0.184	0.69281	-0.0308324	0.423307	26.6	0.183
SDD	114572	2	27445520	A	G	CAD	NP_004332.2	ENSP00000264705	D210G	TRUE	-1	-3.083	-3.2	-2.966	3.1853	-1.61947	0.194	-2.72	0.883	0.47	0.508558	0.118886	0.908377	22.7	0.1437
SDD	114572	X	49143241	G	A	PPP1R3F	NP_149992.3	ENSP00000055335	V697I	FALSE	0.031	-3.253	-3.388	-3.118	3.25391	-1.32856	0.087	0.29	0.038	0.051	0.287055	-0.703742	0.00818277	7.45	0.0795
SDD	114576	11	134093804	C	T	NCAPD3	NP_056076.1	ENSP00000433681	G6D	TRUE	0.533	-2.6295	-3.105	-2.154	-0.065918	-0.183742	0.85	2.08	0.117	0.044	0.443106	-0.204278	0.0437574	6.578	0.0671
SDD	114576	2	135745316	C	G	MAP3K19	NP_079328.3	ENSP00000376647	V376L	TRUE	0.045	-3.3935	-3.385	-3.402	3.54419	0.513943				0.056	0.233029	-0.203528	0.0328846	2.119	0.1043
SDD	114592	13	42622928	C	G	DGKH	NP_821077.1	ENSP00000337572	Q7E	FALSE	0.966381	-3.4415	-3.004	-3.879	7.632	0.845202	0.013	-1.06	0.082	0.256	0.882337	-0.140945	0.458236	19.61	0.0831
SDD	11459	14	63453797	A	G	KCNH5	NP_647479.2	ENSP00000321427	L181P	TRUE	0.075	-4.0475	-4.532	-3.563	4.04919	-11.4551	0.002	-5.48	0.988	0.895	0.872247	0.516989	0.9971	27.4	0.931
SDD	114608	20	62071037	C	T	KCNQ2	NP_742105.1	ENSP00000352035	G281R	TRUE	0.014	-5.418	-5.783	-5.053	9.18323	-12.5919	0.017	-5.61	0.98	0.961	0.93085	0.564153	0.999077	27.9	0.9997
SDD	114608	8	104927748	C	T	RIMS2	NP_001093587.1	ENSP00000427018	S613L	TRUE	0	-3.378	-3.334	-3.422	5.56226	-3.99298	0.627	2.09	0.634	0.367	0.821877	0.137958	0.912054	24.9
SDD	114627	17	42635531	G	C	FZD2	NP_001457.1	ENSP00000323901	G159R	TRUE	0.083	-2.9485	-2.843	-3.054	1.52148	-0.508196	0.436	-0.7	0.254	0.079	0.923828	-0.176451	0.273174	22.5	0.2998
SDD	114627	8	38271703	C	T	FGFR1	NP_075598.2	ENSP00000400162	R718H	TRUE	0.04	-4.59	-4.296	-4.884	10.3193	-8.89506	0.006	-1.98	0.946	0.869	0.897967	0.303586	0.989986	29.4	0.8551
SDD	114631	12	131471727	C	T	ADGRD1	NP_942122.2	ENSP00000261654	P193L	TRUE	0.109	-3.458	-3.246	-3.67	7.58105	-3.7787	0.001	-0.8	0.602	0.255	0.374012	-0.118504	0.928809	22.9	0.0915
SDD	114631	19	50139947	G	A	RRAS	NP_006261.1	ENSP00000246792	R128W	TRUE	0.003	-3.5345	-3.586	-3.483	9.85562	-8.94578	0	-1.19	0.758	0.708	0.859967	0.225248	0.998416	26.5	0.9485
SDD	114631	5	162886977	T	A	NUDCD2	NP_660309.1	ENSP00000304854	E27V	TRUE	0.037	-4.123	-4.241	-4.005	10.5254	-6.39527	0.013	2.35	0.911	0.618	0.710544	0.252718	0.997884	32	0.956
SDD	114659	11	46765758	C	T	CKAP5	NP_001008938.1	ENSP00000432768	A1972T	TRUE	0.517	-3.281	-3.281		3.72852	0.506224	0.024	0.85	0.262	0.135	0.468784	-0.259393	0.456322	23.9	0.0917
SDD	114659	12	91450040	A	C	KERA	NP_008966.1	ENSP00000266719	F7V	TRUE	0.960484	-3.241	-3.019	-3.463	4.626	0.153536	0.383	0.6	0.073	0.089	0.351485	-0.252008	0.425036	8.949	0.0773
SDD	114659	7	92732491	C	T	SAMD9	NP_060124.2	ENSP00000369292	E974K	TRUE	0.016	-3.6355	-3.526	-3.745	5.76587	-0.540395	0.005	1.79	0.829	0.232	0.450927	-0.0184001	0.928572	23.8	0.2191
SDD	114663	10	106927086	C	A	SORCS3	NP_055793.1	ENSP00000358715	P627H	FALSE	0.005	-3.242	-3.233	-3.251	3.62939	-3.93136	0.004	2.01	0.378	0.168	0.464182	-0.145849	0.920532	25.4	0.2519
SDD	114663	12	59271223	T	C	LRIG3	NP_700356.2	ENSP00000326759	H832R	FALSE	0.055	-3.3935	-3.248	-3.539	5.51172	-3.23208	0.255	0.23	0.775	0.308	0.879327	0.238487	0.892157	26.6	0.2321
SDD	114671	10	108339214	G	A	SORCS1	NP_001013049.1	ENSP00000263054	T1095I	TRUE	0.151	-3.0055	-3.094	-2.917	1.30249	-7.45798	0.096	2.48	0.236	0.044	0.60766	-0.348908	0.265608	20.9	0.2002
SDD	114671	11	66108691	C	T	BRMS1	NP_056214.1	ENSP00000353042	R115H	TRUE	0.02	-3.677	-3.677			-6.15906	0.002		0.438	0.444	0.7733	0.151685	0.904885	27	0.2892
SDD	114671	19	50100416	G	A	PRR12	NP_065770.1	ENSP00000394510	E942K	TRUE	0.008	-2.887	-2.887		7.50391	-0.742143	0.008	2.08	0.653	0.19	0.879571	0.0505457	0.979186	27.5	0.9889
SDD	114671	1	78479299	G	A	DNAJB4	NP_001304028.1	ENSP00000359799	R259Q	TRUE	0.024	-3.404	-2.954	-3.854	8.14441	-1.88736	0.054	0.98	0.841	0.262	0.583183	0.112259	0.937153	31	0.2977
SDD	114677	12	113328765	G	A	RPH3A	NP_001137326.1	ENSP00000374036	A578T	TRUE	0.038	-3.749	-3.74	-3.758	8.47229	-10.6575	0.008	-0.4	0.665	0.43	0.788479	0.102674	0.99451	28.9	0.977
SDD	114677	21	43161771	C	G	RIPK4	NP_065690.2	ENSP00000332454	A528P	TRUE	0.023	-3.188	-3.188		7.55908	-4.98654	0.003	1.74	0.844	0.47	0.546003	0.241859	0.991359	25.2
SDD	11467	13	103449294	G	A	POGLUT2	NP_076994.2	ENSP00000365172	T83I	FALSE	0.115	-2.8725	-2.872	-2.873	2.85437	-1.29647	0.12	-2.02	0.665	0.452	0.586593	0.190002	0.907384	22.9	0.3149
SDD	114693	20	25206144	A	G	ENTPD6	NP_001309317.2	ENSP00000401895	E436G	FALSE	0.993418	-3.443	-2.922	-3.964	9.363	0.770869	0	2.08	0.402	0.154		-0.00615313	0.97297	28.4	0.2625
SDD	114703	19	42489099	C	T	ATP1A3	NP_689509.1	ENSP00000498113	V322I	TRUE	0.017	-3.922	-3.755	-4.089	5.72101	-4.85132					0.805029	0.155668	0.949086	24.9	0.5379
SDD	114703	9	140356639	C	T	PNPLA7	NP_001092007.2	ENSP00000384610	E1213K	TRUE	0.0911361	-3.264	-3.29	-3.238	7.189	-4.25726	0.002	-1.24	0.874	0.766	0.6734	0.379912	0.991437	26.2	0.1723
SDD	114717	1	110032640	C	T	ATXN7L2	NP_699171.3	ENSP00000358886	R376W	FALSE	0.011	-3.333	-3.407	-3.259	1.64404	-2.65064	0.009	0.76	0.591	0.122	0.622525	-0.197846	0.3184	26.6	0.1251
control	11472.s1	1	53323026	C	T	ZYG11A	NP_001004339.2	ENSP00000360583	P205S	TRUE	0.077	-3.4425	-3.182	-3.703	9.57043	-1.55166	0.005	5.42	0.498	0.242	0.606538	-0.0631681	0.996665	24.6	0.1628
control	11472.s1	7	20198320	A	G	MACC1	NP_877439.3	ENSP00000383185	V555A	TRUE	0.0116732	-3.338	-3.132	-3.544	5.202	-1.19964	0.183	2.91	0.54	0.209	0.385998	-0.110794	0.758681	22.8	0.3577
SDD	114729	13	46577349	A	G	ZC3H13	NP_001317495.1	ENSP00000242848	I290T	FALSE	0.135	-2.898	-3.178	-2.618	0.706055	0.435403	0.009	2.53	0.415	0.029		-0.484147	0.0527092	22.1	0.1021
control	11473.s1	3	186006628	C	A	DGKG	NP_001337.2	ENSP00000265022	V139L	TRUE	0.905	-2.7245	-2.716	-2.733	-0.300537	-0.717099	0.755	0.94	0.075	0.145	0.271442	-0.29909	0.0820671	5.618	0.0789
SDD	114735	10	105330835	C	T	NEURL1	NP_004201.3	ENSP00000358795	R98C	FALSE	0.10718	-3.804	-3.47	-4.138	12.996	-6.3048	0		0.658	0.474	0.825652	0.243191	0.997038	26	0.9733
SDD	114735	10	126136209	G	A	NKX1-2	NP_001139812.1	ENSP00000451945	A241V	FALSE	0.311	-2.7035	-2.734	-2.673	3.54828	-2.457	0.295	-2.6	0.155	0.103	0.807833	-0.0683886	0.06293	11.96	0.0932
SDD	114740	4	1806119	G	A	FGFR3	NP_001156685.1	ENSP00000339824	G382R	TRUE	0.013	-3.415	-3.498	-3.332	5.07678	-8.01674	0.014	-1.98	0.827	0.696	0.546919	0.309827	0.89164	23.8	0.9154
SDD	114747	1	33746039	A	G	ZNF362	NP_689706.2	ENSP00000446335	K222E	FALSE	0.006	-3.667	-3.985	-3.349	4.67676	-10.2361	0.068	3.19	0.746	0.28	0.833832	0.0767579	0.91963	24.7	0.5826
SDD	114753	4	158257880	G	C	GRIA2	NP_001077088.2	ENSP00000264426	G609R	TRUE	0.038	-5.061	-5.032	-5.09	8.6673	-12.9917	0	-2.66	0.948	0.918	0.918885	0.45761	0.998066	29.5	0.9997
SDD	114766	7	107398632	C	T	CBLL1	NP_079090.2	ENSP00000401277	S162F	FALSE	0.007	-3.935	-3.794	-4.076	8.40949	-5.58465	0.04	1.35	0.937	0.398	0.804839	0.252668	0.983525	25.9	0.8466
SDD	11476	22	32111090	T	C	PRR14L	NP_775837.2	ENSP00000331845	K912R	FALSE	0.0679612	-2.9235	-3.5	-2.347	0.897	-0.893734	0.145	3.18	0.05	0.058	0.249733	-0.401298	0.0524079	7.291	0.0867
SDD	114786	9	140057132	G	A	GRIN1	NP_015566.1	ENSP00000360616	A652T	TRUE	0.026	-4.8825	-5.205	-4.56	7.01843	-10.9149	0	0.08	0.713	0.58	0.876594	0.141415	0.997697	32	0.9939
SDD	114786	X	112065904	G	A	AMOT	NP_001106962.1	ENSP00000361027	R151W	FALSE	0.164	-3.914	-3.815	-4.013	6.7027	-3.06843	0.002	3.21	0.606	0.231	0.837387	0.189882	0.890864	24.6	0.7305
SDD	11479	16	15702348	G	C	MARF1	NP_001171927.1	ENSP00000450309	L1328V	FALSE	0.054	-3.636	-3.579	-3.693	6.3584	-1.359	0.223		0.631	0.152	0.610996	0.0465741	0.71712	23.4	0.2633
SDD	114824	19	47769903	G	A	CCDC9	NP_056418.1	ENSP00000221922	M252I	FALSE	0.003	-3.1075	-3.163	-3.052	5.45532	-5.42514	0.027	0.84	0.388	0.293	0.799533	-0.00562613	0.974798	31	0.5512
SDD	114824	1	248202069	A	G	OR2L2	NP_001004686.1	ENSP00000493154	Y167C	FALSE	0.0287329	-3.106	-3.298	-2.914	4.71	-4.63728					0.238656	-0.276486	0.759107	5.154	0.2967
SDD	114828	10	31137902	A	C	ZNF438	NP_001137238.1	ENSP00000406934	Y478D	FALSE	0.0250348	-2.8025	-2.605	-3	4.592	2.28874	0.25	3.19	0.117	0.025	0.236062	-0.247361	0.0348295	7.346	0.105
SDD	114835	2	197106861	G	T	HECW2	NP_065811.1	ENSP00000260983	N1199K	TRUE	0.04	-3.8685	-3.6	-4.137	10.4861	-1.77149	0.037	-2.07	0.84	0.574	0.913115	0.0700336	0.995144	23.8	0.9979
SDD	114835	6	170144369	T	C	DYNLT2	NP_777570.1	ENSP00000355736	Y41C	TRUE	0.76	-3.712	-3.539	-3.885	7.67789	-1.44919	0.049	2.11	0.658	0.251	0.616235	0.0838192	0.946401	26.1	0.3228
SDD	114838	11	128350086	C	A	ETS1	NP_001137292.1	ENSP00000376436	G375C	FALSE	0.042	-4.531	-4.433	-4.629	12.3716	-9.30815	0.005	2.46	0.634	0.336	0.895737	0.0519624	0.99317	35	0.9989
SDD	11485	2	136609013	G	A	MCM6	NP_005906.2	ENSP00000264156	R626C	TRUE	0.0597942	-4.3145	-4.383	-4.246	10.352	-9.04561	0	2.42	0.891	0.739	0.797814	0.272038	0.999934	33	0.9805
SDD	11485	2	233028236	T	A	DIS3L2	NP_689596.4	ENSP00000315569	Y340N	TRUE	0.007	-3.126	-3.277	-2.975	2.50348	-3.72233	0.538	0.93	0.841	0.19	0.792143	0.139098	0.604256	21.1	0.2693
SDD	11485	5	123984813	G	A	ZNF608	NP_065798.2	ENSP00000421899	P422S	TRUE	0.046	-3.5335	-3.176	-3.891	8.62866	0.530378	0.019			0.529	0.888647	0.234524	0.991987	27.5	0.9942
SDD	114868	16	85696625	G	A	GSE1	NP_001127945.1	ENSP00000384839	D663N	FALSE	0.007	-3.1905	-3.27	-3.111	6.25464	-3.66594	0.014	0.74	0.704	0.22	0.881703	-0.123141	0.827766	28.1	0.768
SDD	114880	7	143043689	T	C	CLCN1	NP_000074.3	ENSP00000339867	F768L	FALSE	0.436	-2.762	-2.76	-2.764	-0.962158	0.333914	0.348	-1.81	0.384	0.183	0.567351	-0.0944665	0.0675891	20.2	0.2535
SDD	114883	11	62401803	T	A	GANAB	NP_938149.2	ENSP00000340466	K202M	FALSE	0.962	-3.553	-3.375	-3.731	7.04993	-2.2725	0.007	-2.43	0.403	0.282	0.329627	0.0345498	0.928603	23.8
control	11489.s1	1	27440652	C	T	SLC9A1	NP_003038.2	ENSP00000263980	V160I	TRUE	0.052	-3.1215	-3.066	-3.177	0.518189	-0.417092	0.472	2.26	0.155	0.04	0.36097	-0.31028	0.0817836	9.142	0.0736
control	11491.s1	14	51464896	A	G	TRIM9	NP_055978.4	ENSP00000298355	V492A	TRUE	0.024	-3.305	-3.069	-3.541	4.27087	-6.18952	0.292	0.23	0.678	0.312	0.763741	0.168262	0.71996	23.4	0.4924
SDD	114929	2	69555481	C	T	GFPT1	NP_002047.2	ENSP00000354347	M587I	FALSE	0.005	-4.017	-4.203	-3.831	3.69434	-9.57186	0.074	-0.07	0.554	0.339	0.900225	0.179343	0.894797	22.9	0.897
SDD	114929	3	49829209	C	T	CDHR4	NP_001007541.2	ENSP00000391409	E741K	FALSE	0.447	-3.0085	-3.095	-2.922	4.77576	-0.882381	0.288	0.38	0.176	0.089	0.340969	-0.102862	0.0486004	8.961	0.0729
control	11494.s1	1	114215314	C	G	MAGI3	NP_001136254.1	ENSP00000304604	A999G	TRUE	0.322476	-3.1795	-3.282	-3.077	3.226	0.107273	0.328	2.43	0.157	0.054	0.34328	-0.301716	0.528364	17.17	0.0881
SDD	114942	10	68940134	C	T	CTNNA3	NP_037398.2	ENSP00000389714	A330T	FALSE	0.311	-2.629	-2.794	-2.464	-0.775757	-2.19194	0.061	1.38	0.277	0.153	0.462403	-0.420211	0.128712	20.2	0.0668
SDD	114942	20	25289125	G	A	ABHD12	NP_001035937.1	ENSP00000341408	A252V	FALSE	0.004	-3.33	-3.294	-3.366	5.46332	-5.02196	0.003	1.4	0.765	0.282	0.834598	0.20885	0.922528	25.6	0.9342
control	11496.s1	20	30432906	G	A	FOXS1	NP_004109.1	ENSP00000365145	T147M	TRUE	0.072	-3.229	-3.229			-1.80991	0.1	-3.14	0.068	0.092	0.355806	-0.453552	0.00802357	8.574	0.075
SDD	11496	11	118772216	G	A	BCL9L	NP_872363.1	ENSP00000335320	R746W	TRUE	0.335	-3.9645	-4.491	-3.438	6.93311	-5.79426	0.012	-1.21	0.777	0.537	0.685106	0.143575	0.887451	26.6	0.4007
SDD	11496	11	65978677	C	T	PACS1	NP_060496.2	ENSP00000316454	R203W	TRUE	0.105	-5.0575	-5.55	-4.565	9.23834	-11.6244	0	1.16	0.974	0.443	0.915627	0.259086	0.996643	26.9	0.9984
control	11497.s1	4	77184948	A	G	FAM47E	NP_001130042.1	ENSP00000409423	E171G	TRUE	0.064	-3.4215	-3.349	-3.494	5.89136	-0.23152	0.107	2.43	0.075	0.144	0.28046	-0.12988	0.637898	21.2	0.0936
control	11497.s1	4	77184948	A	G	FAM47E-STBD1	NP_001229868.1	ENSP00000422067	E171G	TRUE	-1	-3.426	-3.426			-0.245915	0.102	2.43	0.083	0.144	0.28046	-0.12988	0.637898	21.2	0.0936
SDD	114976	19	51378096	C	T	KLK2	NP_005542.1	ENSP00000313581	H56Y	FALSE	0.0623637	-3.4395	-3.326	-3.553	7.218	-4.93834	0.048	3.26	0.157	0.096	0.385412	0.00166834	0.718828	1.45	0.349
control	11499.s1	12	99053025	G	A	APAF1	NP_863651.1	ENSP00000448165	R205Q	TRUE	0.09	-3.5355	-3.263	-3.808	6.90088	0.078786	0.007	-1.09	0.841	0.509	0.547809	0.244475	0.98871	29.5	0.2394
control	11499.s1	17	8108242	G	A	AURKB	NP_001271455.1	ENSP00000313950	R329W	TRUE	0.367753	-3.471	-3.153	-3.789	7.701	-5.71071		3.06	0.38	0.117	0.406555	-0.231898	0.730195	29	0.1566
control	11499.s1	8	144378213	G	A	ZNF696	NP_112157.2	ENSP00000328515	R123Q	TRUE	0.0013738	-2.9155	-2.779	-3.052	6.159	-2.69675	0.002	1.41	0.082	0.089	0.511823	-0.209803	0.442397	17.51	0.1729
SDD	114995	8	22863571	G	T	RHOBTB2	NP_001153508.1	ENSP00000427926	R154L	TRUE	0.069	-3.485		-3.485	5.45264		0.006	1.94	0.846	0.532	0.910963	0.21945	0.989814	31	0.9126
SDD	115001	12	123470774	C	T	PITPNM2	NP_001287730.1	ENSP00000280562	G1278S	TRUE	0.591	-3.141	-3.155	-3.127	1.38892	1.02665	0.901	1.32	0.081	0.035	0.751647	-0.23597	0.103476	13.16	0.0709
SDD	115001	1	181620576	G	A	CACNA1E	NP_000712.2	ENSP00000356542	G352R	TRUE	0.0630742	-4.6345	-5.616	-3.653	5.073	-9.26871	0.006	-4.38	0.9	0.913	0.968954	0.478791	0.998306	32	0.9972
SDD	115004	3	184098188	G	C	CHRD	NP_003732.2	ENSP00000204604	G28R	FALSE	0.597884	-2.6335	-2.599	-2.668	0.238	0.308521	0.583	2.78	0.375	0.125	0.895761	-0.231588	0.201605	21.9	0.1645
control	11501.s1	15	90334290	G	A	ANPEP	NP_001141.2	ENSP00000300060	R855W	TRUE	0.108	-4.0415	-3.88	-4.203	11.1727	-9.51533	0	3.32	0.904	0.458	0.527537	0.119298	0.997499	31	0.9179
SDD	115010	19	42754607	C	T	ERF	NP_006485.2	ENSP00000222329	V45I	TRUE	0.256	-3.5235	-3.558	-3.489	5.36844	-4.9871	0.06	1.95	0.468	0.24	0.53691	-0.0833709	0.745328	25.1	0.2731
control	11502.s1	5	120021782	A	C	PRR16	NP_001287712.1	ENSP00000385118	Q98P	TRUE	0.0458716	-2.7795	-2.644	-2.915	2.126	1.54199	0.202	0.98	0.206	0.223	0.367988	-0.087793	0.277503	18.32	0.0845
SDD	115020	11	129725769	G	C	TMEM45B	NP_001318140.1	ENSP00000281441	Q184H	FALSE	0.0234279	-3.284	-3.456	-3.112	4.724	-5.84795	0.026	0.56	0.513	0.367	0.502247	-0.0428531	0.994122	22.7	0.6223
SDD	115065	10	90356166	T	G	LIPJ	NP_001010939.2	ENSP00000361007	I190R	FALSE	0.023	-3.2325	-3.229	-3.236	2.8443	-2.36425	0.006	-0.49	0.251	0.212	0.368875	-0.0655197	0.669964	15.58	0.2075
SDD	115090	7	100179671	C	T	LRCH4	NP_002310.2	ENSP00000309689	R162Q	FALSE	0.04	-3.128	-2.979	-3.277	4.69275	-2.88821	0.072	-0.12	0.17	0.156	0.540741	-0.0476748	0.689813	23.7	0.2521
SDD	115099	7	74103560	T	C	GTF2I	NP_001157108.1	ENSP00000482476	M33T	FALSE	0.207077	-5.4665	-5.562	-5.371	9.389	-7.6323			0.778		0.870154	0.219541	0.990587	23.6	0.985
control	11511.s1	10	99426263	C	T	PI4K2A	NP_060895.1	ENSP00000359665	L385F	TRUE	0.032	-3.5655	-3.48	-3.651	5.27625	-5.479	0	-1.38	0.578	0.767	0.771383	0.232563	0.99933	26.2	0.3893
control	11512.s1	19	3767317	C	T	MRPL54	NP_758455.1	ENSP00000331849	R115W	TRUE	0.025	-2.9875	-3.275	-2.7	1.45218	-3.29083	0.236		0.095	0.099	0.329771	-0.222315	0.290245	17.38	0.117
control	11512.s1	2	97020087	T	G	NCAPH	NP_056156.2	ENSP00000240423	F390C	TRUE	0.1	-3.4795	-3.402	-3.557	5.31989	-0.747527	0.002	0.82	0.511	0.301	0.364434	-0.0164885	0.962716	24.4	0.1096
SDD	115121	19	39207744	C	T	ACTN4	NP_004915.2	ENSP00000252699	R311C	FALSE	0.008	-3.4505	-3.119	-3.782	5.64703	-9.76315	0.001	0.7	0.813	0.338	0.780957	0.245355	0.967303	26	0.1393
SDD	11514	12	54645973	C	A	CBX5	NP_036249.1	ENSP00000209875	C59F	FALSE	0.042	-5.0945	-5.035	-5.154	7.12943	-7.1179	0.001	-0.79	0.853	0.747	0.842516	0.398903	0.999834	26.4	0.9987
SDD	115151	19	2223288	C	A	DOT1L	NP_115871.1	ENSP00000381657	N1133K	FALSE	0.327407	-3.3235	-2.884	-3.763	10.51	0.462926	0	0.86	0.562	0.162	0.735535	-0.0860463	0.978596	23.3	0.8802
SDD	115151	8	38205277	G	A	NSD3	NP_075447.1	ENSP00000313983	S138L	FALSE	0.107	-3.4295	-3.52	-3.339	0.555908	-0.362466	0.562	-3.71	0.171	0.192	0.513517	-0.039251	0.174926	21.9	0.0789
SDD	115151	X	41420891	A	C	CASK	NP_003679.2	ENSP00000494788	L530R	FALSE	0.005	-5.686	-6.308	-5.064	9.03015	-14.2016					0.903524	0.396937	0.999241	26.6	0.9995
SDD	115160	1	207224227	C	A	YOD1	NP_061036.3	ENSP00000326813	R50L	FALSE	0.219	-3.851	-3.905	-3.797	7.745	-3.92077	0.004		0.759	0.419	0.792845	0.55314	0.9994	32	0.7222
SDD	115160	5	7820717	C	T	ADCY2	NP_065433.2	ENSP00000342952	A1013V	FALSE	0.148	-4.1125	-4.075	-4.15	6.18518	-6.4063	0.004	1.55	0.897	0.471	0.821807	0.22437	0.993212	27.1	0.9738
SDD	115166	17	40478153	C	T	STAT3	NP_644805.1	ENSP00000264657	G449D	FALSE	0.016	-4.0615	-3.848	-4.275	2.37817	-7.72683	0.074	-2.26	0.545	0.638	0.923344	0.221312	0.959866	24.3	0.8612
SDD	115171	15	56122751	T	A	NEDD4	NP_001271267.1	ENSP00000424827	Q1273L	FALSE	0.036	-3.3935	-3.398	-3.389	5.03686	-4.11701	0.078	0.43	0.222	0.219	0.723971	-0.0218991	0.913915	22.9	0.1595
control	11518.s1	3	51908026	C	T	IQCF5	NP_001138531.1	ENSP00000394653	R57Q	TRUE	0.003	-3.2345	-3.097	-3.372	4.29056	-3.44138	0.095	-0.6	0.265	0.086	0.333311	-0.152008	0.0605928	7.499	0.0823
SDD	1151	16	1570662	G	A	IFT140	NP_055529.2	ENSP00000406012	R1201C	TRUE	0.127	-3.5545	-3.676	-3.433	7.7771	-3.83427	0.014	0.79	0.731	0.216	0.596612	0.124556	0.975708	31	0.2205
control	11520.s1	15	44038748	G	A	PDIA3	NP_005304.3	ENSP00000300289	R4H	TRUE	0.932	-2.8265	-2.541	-3.112	5.02148	-1.35851	0.542	3.57	0.056	0.034	0.692412	-0.242405	0.110987	12.96	0.402
control	11520.s1	1	159827660	A	G	VSIG8	NP_001013683.1	ENSP00000357080	L176P	TRUE	0	-3.444	-3.667	-3.221	3.96289	-6.19488	0.001	-0.18	0.753	0.397	0.468672	0.0119647	0.996373	25.8	0.8989
SDD	115203	1	70900860	C	T	CTH	NP_001893.2	ENSP00000359976	P351L	FALSE	0.03	-3.557	-3.482	-3.632	8.34943	-8.37159	0	-2.37	0.94	0.914	0.683726	0.352822	0.999927	32	0.8878
SDD	11521	12	68051286	A	G	DYRK2	NP_006473.2	ENSP00000342105	N200S	FALSE	0.135	-3.395	-3.078	-3.712	6.79797	-5.56696	0.011	-0.52	0.539	0.436	0.628349	-0.0633337	0.971529	25	0.6084
SDD	11521	4	110681521	C	A	CFI	NP_001317964.1	ENSP00000427438	G263V	FALSE	0.01	-3.136	-3.092	-3.18	5.065	-0.680878	0.05	-3.72	0.531	0.332	0.275371	0.051347	0.397449	16.36	0.1746
SDD	115224	14	23848252	T	C	CMTM5	NP_001275675.1	ENSP00000344819	C165R	FALSE	0.102489	-3.5465	-3.485	-3.608	8.119	-3.27273	0	0.45	0.502	0.386	0.721272	0.22082	0.996792	28	0.9874
SDD	115229	11	48134511	T	C	PTPRJ	NP_002834.3	ENSP00000400010	S110P	FALSE	0.97	-2.933	-3.102	-2.764	0.861084	-0.425239	0.398	2.37	0.077	0.014	0.325567	-0.236122	0.0460577	0.04	0.0673
SDD	115238	12	105151445	C	T	CHST11	NP_060883.1	ENSP00000305725	T308M	FALSE	0.113	-3.714	-3.793	-3.635	7.47809	-8.202	0.005	-0.83	0.628	0.559	0.701431	0.223838	0.970624	25.8	0.3024
SDD	115238	2	128186242	C	T	PROC	NP_000303.1	ENSP00000234071	P369L	FALSE	0.003	-3.489	-3.407	-3.571	7.81378	-3.57253		-3.21	0.53	0.55	0.290339	0.245554	0.935103	21.1	0.1872
SDD	115238	X	54259292	C	T	WNK3	NP_065973.2	ENSP00000346667	R1597Q	FALSE	0.875	-4.231	-3.842	-4.62	8.64331	-0.576583	0.024	-0.87	0.487	0.303	0.420502	0.0541917	0.96038	26.7	0.6549
SDD	115249	16	89967153	G	T	TCF25	NP_055787.1	ENSP00000263346	R444S	TRUE	0.162516	-2.8665	-2.828	-2.905	3.484	-4.65273	0.106		0.599	0.234	0.402034	0.1499	0.852431	21.4	0.2699
SDD	115249	17	60685448	C	T	TLK2	NP_006843.2	ENSP00000275780	T673M	TRUE	0.088	-4.94	-4.78	-5.1	8.43811	-8.81401	0	2.06	0.658	0.463	0.879608	0.102805	0.994331	26.7	0.8941
SDD	11524	6	170592746	C	T	DLL1	NP_005609.3	ENSP00000355718	G541R	TRUE	0.714	-2.9325	-2.74	-3.125	3.76575	-2.98846	0.009	-2.02	0.234	0.483	0.476622	0.0230911	0.360796	23.4	0.1229
control	11525.s1	1	43392758	G	A	SLC2A1	NP_006507.2	ENSP00000416293	T478I	TRUE	0.617	-2.918	-2.739	-3.097	4.14911	-0.729848	0.114	-1.14	0.332	0.235	0.694694	0.00452125	0.583371	22.8	0.11
SDD	115267	8	17794868	A	C	PCM1	NP_001339561.2	ENSP00000327077	N108H	FALSE	-1	-3.049	-3.049			-0.928701	0.003	3.38	0.834	0.311	0.739145	-0.039492	0.957739	25.9	0.3556
SDD	11527	11	57799014	C	T	OR6Q1	NP_001005186.2	ENSP00000307734	T197I	FALSE	0.017	-2.6675	-2.918	-2.417	1.70868	-2.93525	0.064	8.74	0.239	0.11	0.429816	-0.269135	0.8611	14.19	0.1248
SDD	11527	16	22274473	C	T	EEF2K	NP_037434.2	ENSP00000263026	R448W	FALSE	0.125	-3.2705	-3.163	-3.378	7.12891	-1.45529	0.002	2.71	0.845	0.186	0.560833	-0.257228	0.889688	25.9	0.1473
SDD	115293	19	16860348	C	T	NWD1	NP_001007526.3	ENSP00000428579	R299C	FALSE	0.06	-3.2895	-3.252	-3.327	5.00293	-1.1555	0.061	0.41	0.323	0.291	0.396435	-0.133709	0.647523	22.8	0.0973
SDD	115325	2	70463275	T	A	TIA1	NP_071505.2	ENSP00000401371	E20V	FALSE	0.268	-4.1915	-4.396	-3.987	7.1929	-12.1595	0	-1.34	0.837	0.954	0.864033	0.418792	0.996833	33	0.9972
SDD	115328	17	1552143	G	A	RILP	NP_113618.2	ENSP00000301336	P209S	FALSE	0.076	-2.8515	-2.665	-3.038	6.59351	-1.40822	0.186	2.08	0.088	0.046	0.637076	-0.346978	0.0351395	9.935	0.089
SDD	115340	17	46620822	C	T	HOXB2	NP_002136.1	ENSP00000331741	E227K	FALSE	0.105	-2.912	-2.834	-2.99	3.237	-1.97398	0.056	-2.44	0.349	0.316	0.661875	0.0624687	0.533363	19.52	0.084
SDD	115346	18	10485714	C	T	APCDD1	NP_694545.1	ENSP00000347433	R344W	FALSE	0.012	-3.4235	-3.595	-3.252	4.66095	-4.64223	0.017	1.82	0.55	0.103	0.30949	-0.297178	0.559412	23.6	0.251
SDD	11534	3	184060561	G	A	FAM131A	NP_653236.3	ENSP00000373360	A180T	FALSE	0	-3.894	-3.894			-6.30376	0	1.06	0.86	0.606	0.82415	0.263586	0.994071	29.9	0.9725
SDD	11534	4	1309241	C	G	MAEA	NP_001017405.1	ENSP00000302830	I103M	FALSE	0.06	-3.1265	-2.693	-3.56	5.3595	-4.00753	0.006	0.67	0.866	0.347	0.808578	0.00209858	0.928767	19.74	0.2004
SDD	115362	1	110293311	G	A	EPS8L3	NP_620641.1	ENSP00000358820	R582W	FALSE	0.197	-3.943	-3.973	-3.913	12.9277	-7.33639	0.001	2.28	0.709	0.234	0.387477	-0.0718819	0.883335	25.9	0.317
control	11537.s1	2	75118016	C	T	HK2	NP_000180.2	ENSP00000290573	A901V	TRUE	0.23	-3.5165	-3.642	-3.391	5.68176	-6.91373	0	-5.84	0.929	0.885	0.720294	0.407036	0.965564	26.5	0.9509
SDD	115383	17	79768960	C	T	GCGR	NP_000151.1	ENSP00000383558	R116C	FALSE	0.093	-4.0995	-4.137	-4.062	9.09662	-9.62312	0	-0.09	0.75	0.411	0.483233	0.0276835	0.991722	24.6	0.7441
SDD	115383	17	8050852	G	A	PER1	NP_002607.2	ENSP00000314420	P478L	FALSE	0.014	-2.899	-3.107	-2.691	1.69629	-1.53402	0.137	2.64	0.225	0.036	0.482319	-0.133879	0.469635	20.7	0.073
SDD	115399	12	51236848	C	T	TMPRSS12	NP_872365.2	ENSP00000381476	S34L	FALSE	0.698451	-3.102	-3.108	-3.096	5	-0.150525	0.098	-2.37	0.108	0.162	0.378216	-0.106047	0.10966	6.582	0.0909
control	11540.s1	11	43905540	G	A	ALKBH3	NP_631917.1	ENSP00000302232	R64H	TRUE	0.734195	-3.2635	-3.077	-3.45	5.908	-2.98306	0.004	1.63	0.535	0.262	0.485612	-0.100149	0.930927	29.1	0.1237
SDD	115405	14	52781816	G	T	PTGER2	NP_000947.2	ENSP00000245457	G184W	FALSE	0	-3.9145	-4.029	-3.8	8.28784	-9.21545	0	1.13	0.856	0.68	0.723272	0.17316	0.999783	33	0.9804
SDD	115417	19	14232505	G	A	ASF1B	NP_060624.1	ENSP00000263382	P81S	FALSE	0.001	-3.104	-2.951	-3.257	4.85397	-2.91094	0.223		0.337	0.093	0.525738	-0.113318	0.80503	22.3	0.188
SDD	115417	9	33255882	C	A	BAG1	NP_004314.6	ENSP00000489189	G310V	FALSE	0.100962	-3.8115	-4.111	-3.512	7.023	-7.51995			0.613		0.346148	0.0190425	0.932277	24.8	0.2048
control	11542.s1	11	125791158	A	G	DDX25	NP_037396.3	ENSP00000263576	Y425C	TRUE	0.046	-2.849	-2.904	-2.794	-0.0421143	1.72723	0.29	-0.96	0.59	0.31	0.604438	0.0278882	0.794878	24.8	0.0762
SDD	115420	19	48183710	C	A	BICRA	NP_056526.3	ENSP00000379946	P428Q	TRUE	0.047	-2.8145	-2.775	-2.854	1.88159	-0.935932	0.002	1.46	0.32	0.093	0.668943	-0.108006	0.294535	21.6	0.0942
SDD	11543	20	25457525	G	C	NINL	NP_079452.3	ENSP00000278886	S801W	FALSE	0.312	-3.617	-3.747	-3.487	5.00146	-2.43577	0.005	1.31	0.272	0.1	0.388334	-0.158825	0.531829	11.18	0.1412
SDD	11543	4	52928390	C	T	SPATA18	NP_660306.1	ENSP00000295213	T105M	FALSE	0.714	-3.161	-3.233	-3.089	4.7218	-0.602894	0.03	1.94	0.483	0.04	0.342266	-0.372918	0.178186	22.3	0.1283
control	11544.s1	22	29884893	C	G	NEFH	NP_066554.2	ENSP00000311997	L422V	TRUE	0.014	-2.858	-2.612	-3.104	4.37109	-1.17717	0.016	-1.56	0.172	0.184	0.349789	-0.0373033	0.204897	17.57
control	11545.s1	2	105900851	A	G	TGFBRAP1	NP_004248.2	ENSP00000377027	M348T	TRUE	0.0686275	-3.4015	-3.44	-3.363	5.857	-4.17187	0.021	1.02	0.569	0.216	0.69829	0.00850759	0.79784	23.9	0.2796
SDD	115453	19	4817105	C	T	TICAM1	NP_891549.1	ENSP00000248244	E429K	FALSE	0.003	-4.262	-4.521	-4.003	9.16016	-7.05942	0.005	4.35	0.54	0.239	0.732557	-0.0499297	0.934204	26.7	0.3803
SDD	115456	19	3110155	G	A	GNA11	NP_002058.2	ENSP00000078429	E49K	TRUE	0.183	-4.5295	-4.409	-4.65	12.6018	-9.34969	0	-1.08	0.868	0.81	0.877062	0.297163	0.999623	31	0.9984
SDD	115456	1	26150217	C	T	MTFR1L	NP_062457.3	ENSP00000363419	P36L	TRUE	0.172	-3.489	-3.431	-3.547	5.38092	-0.601651	0.015	0.4	0.97	0.417	0.722504	0.163485	0.893101	25	0.7355
SDD	115460	1	86342851	C	T	COL24A1	NP_690850.2	ENSP00000359603	R995Q	FALSE	0.007	-3.378	-3.155	-3.601	5.96777	0.546419	0.927	-2.73	0.492	0.356	0.41039	-0.0637132	0.26526	22.6	0.1023
SDD	115463	11	119148981	T	C	CBL	NP_005179.2	ENSP00000264033	C401R	TRUE	0.003	-4.636	-5.472	-3.8	8.84839	-15.725	0.001	-4.74	0.969	0.98	0.949842	0.573406	0.999874	28.9	1
SDD	115463	1	111217191	C	A	KCNA3	NP_002223.3	ENSP00000358784	G81C	TRUE	0.719	-3.079	-2.896	-3.262	2.46143	-2.53533	0.196	-4.17	0.328	0.337	0.872821	0.0636414	0.225058	18.9	0.1091
SDD	115474	8	38095661	A	G	DDHD2	NP_056029.2	ENSP00000380352	T186A	TRUE	0.066	-3.128	-2.975	-3.281	2.552	-4.78258	0.13	0.77	0.064	0.056	0.361929	-0.384431	0.0550699	12.59	0.0566
SDD	11547	3	88104966	C	T	CGGBP1	NP_001182237.1	ENSP00000418769	R54H	FALSE	0.132901	-3.904	-3.938	-3.87	3.719	-1.42463	0.006		0.817	0.134	0.900766	0.087385	0.958034	23.8	0.9658
control	11549.s1	15	80467407	A	T	FAH	NP_000128.1	ENSP00000453347	D296V	TRUE	0.019	-3.7265	-3.741	-3.712	9.79504	-9.18414	0	-4.33	0.817		0.442278	0.419599	0.999456	25.4	0.5863
[truncated: 24,452 more rows]
