# Supplementary material for: Deep generative modeling of the human proteome reveals over a hundred novel genes involved in rare genetic disorders
Source: Research Square preprint supplement (doi:10.21203/rs.3.rs-3740259/v1), 2024-01-03
Supplement: Supplementary file 3 [file 20f2a1acdc21eafb79b62cc2.xlsx]

## Sheet: Key
Column	Description
chrom	GRCh37 chromosome
gene	Gene symbol
protein	RefSeq stable protein id
mutant	Candidate variant in severe developmental disorder metacohort
mutant_score	popEVE score
molecule_name	Name of interacting molecule
molecule_type	Type of interacting molecule
chem	Chemical component id
min_dist	Minimum distance of variant to interacting molecule in angstroms
n_interact_structs	Number of structures that contain this interaction
interact_structs	PDB IDs for structures that contain this interaction
n_aa_agree	Number of structures that agree on target amino acid
n_cov_structs_w_entities	Number of structures that cover the target position and have an interacting partner
cov_structs_w_entities	PDB IDs for structures that cover the target position and have an interacting partner
n_cov_structs	Number of structures that cover the target position
cov_structs	PDB IDs for structures that cover the target position

## Sheet: SuppTable10
chrom	gene	protein	mutant	mutant_score	molecule_name	molecule_type	chem	min_dist	n_interact_structs	interact_structs	n_aa_agree	n_cov_structs_w_entities	cov_structs_w_entities	n_cov_structs	cov_structs
5	ETF1	NP_004721.1	R192C	-7.16	28s ribosomal rna	polyribonucleotide		2.45481	11	6ip8; 5a8l; 5lzv; 5lzu; 7o80; 3jag; 3jai; 3jah; 6d90; 6zme; 6xa1	11	23	4d61; 4d5n; 6ip8; 5a8l; 7nwh; 5lzt; 5lzv; 5lzu; 7o80; 3jag; 3jai; 3jah; 6d90; 6zme; 3j5y; 5dmq; 3e1y; 6xa1; 4crn; 4crm; 4af1; 3vmf; 8hku	26	4d61; 4d5n; 6ip8; 5a8l; 7nwh; 5lzt; 5lzv; 5lzu; 7o80; 3jag; 3jai; 3jah; 6d90; 6zme; 3j5y; 1dt9; 5dmq; 3e1y; 6xa1; 4crn; 4crm; 2hst; 4af1; 3vmf; 3agk; 8hku
					18s ribosomal rna	polyribonucleotide		1.62166	2	4d61; 7nwh	2	23	4d61; 4d5n; 6ip8; 5a8l; 7nwh; 5lzt; 5lzv; 5lzu; 7o80; 3jag; 3jai; 3jah; 6d90; 6zme; 3j5y; 5dmq; 3e1y; 6xa1; 4crn; 4crm; 4af1; 3vmf; 8hku	26	4d61; 4d5n; 6ip8; 5a8l; 7nwh; 5lzt; 5lzv; 5lzu; 7o80; 3jag; 3jai; 3jah; 6d90; 6zme; 3j5y; 1dt9; 5dmq; 3e1y; 6xa1; 4crn; 4crm; 2hst; 4af1; 3vmf; 3agk; 8hku
					eukaryotic peptide chain release factor gtp-binding subunit erf3a	polypeptide(L)		5.86442	2	4d61; 5lzt	2	23	4d61; 4d5n; 6ip8; 5a8l; 7nwh; 5lzt; 5lzv; 5lzu; 7o80; 3jag; 3jai; 3jah; 6d90; 6zme; 3j5y; 5dmq; 3e1y; 6xa1; 4crn; 4crm; 4af1; 3vmf; 8hku	26	4d61; 4d5n; 6ip8; 5a8l; 7nwh; 5lzt; 5lzv; 5lzu; 7o80; 3jag; 3jai; 3jah; 6d90; 6zme; 3j5y; 1dt9; 5dmq; 3e1y; 6xa1; 4crn; 4crm; 2hst; 4af1; 3vmf; 3agk; 8hku
					ribosomal protein l3	polypeptide(L)		7.6879	2	3jag; 3jai	2	23	4d61; 4d5n; 6ip8; 5a8l; 7nwh; 5lzt; 5lzv; 5lzu; 7o80; 3jag; 3jai; 3jah; 6d90; 6zme; 3j5y; 5dmq; 3e1y; 6xa1; 4crn; 4crm; 4af1; 3vmf; 8hku	26	4d61; 4d5n; 6ip8; 5a8l; 7nwh; 5lzt; 5lzv; 5lzu; 7o80; 3jag; 3jai; 3jah; 6d90; 6zme; 3j5y; 1dt9; 5dmq; 3e1y; 6xa1; 4crn; 4crm; 2hst; 4af1; 3vmf; 3agk; 8hku
					elongation factor 1-alpha	polypeptide(L)		3.32878	1	3vmf	1	23	4d61; 4d5n; 6ip8; 5a8l; 7nwh; 5lzt; 5lzv; 5lzu; 7o80; 3jag; 3jai; 3jah; 6d90; 6zme; 3j5y; 5dmq; 3e1y; 6xa1; 4crn; 4crm; 4af1; 3vmf; 8hku	26	4d61; 4d5n; 6ip8; 5a8l; 7nwh; 5lzt; 5lzv; 5lzu; 7o80; 3jag; 3jai; 3jah; 6d90; 6zme; 3j5y; 1dt9; 5dmq; 3e1y; 6xa1; 4crn; 4crm; 2hst; 4af1; 3vmf; 3agk; 8hku
					large ribosomal subunit protein ul16	polypeptide(L)		2.89713	1	8hku	1	23	4d61; 4d5n; 6ip8; 5a8l; 7nwh; 5lzt; 5lzv; 5lzu; 7o80; 3jag; 3jai; 3jah; 6d90; 6zme; 3j5y; 5dmq; 3e1y; 6xa1; 4crn; 4crm; 4af1; 3vmf; 8hku	26	4d61; 4d5n; 6ip8; 5a8l; 7nwh; 5lzt; 5lzv; 5lzu; 7o80; 3jag; 3jai; 3jah; 6d90; 6zme; 3j5y; 1dt9; 5dmq; 3e1y; 6xa1; 4crn; 4crm; 2hst; 4af1; 3vmf; 3agk; 8hku
					large ribosomal subunit protein ul14	polypeptide(L)		3.37924	1	5lzt	1	23	4d61; 4d5n; 6ip8; 5a8l; 7nwh; 5lzt; 5lzv; 5lzu; 7o80; 3jag; 3jai; 3jah; 6d90; 6zme; 3j5y; 5dmq; 3e1y; 6xa1; 4crn; 4crm; 4af1; 3vmf; 8hku	26	4d61; 4d5n; 6ip8; 5a8l; 7nwh; 5lzt; 5lzv; 5lzu; 7o80; 3jag; 3jai; 3jah; 6d90; 6zme; 3j5y; 1dt9; 5dmq; 3e1y; 6xa1; 4crn; 4crm; 2hst; 4af1; 3vmf; 3agk; 8hku
					23s rrna (2996-mer)	polyribonucleotide		3.28989	1	8hku	1	23	4d61; 4d5n; 6ip8; 5a8l; 7nwh; 5lzt; 5lzv; 5lzu; 7o80; 3jag; 3jai; 3jah; 6d90; 6zme; 3j5y; 5dmq; 3e1y; 6xa1; 4crn; 4crm; 4af1; 3vmf; 8hku	26	4d61; 4d5n; 6ip8; 5a8l; 7nwh; 5lzt; 5lzv; 5lzu; 7o80; 3jag; 3jai; 3jah; 6d90; 6zme; 3j5y; 1dt9; 5dmq; 3e1y; 6xa1; 4crn; 4crm; 2hst; 4af1; 3vmf; 3agk; 8hku
					erf3a	polypeptide(L)		4.85125	1	7nwh	1	23	4d61; 4d5n; 6ip8; 5a8l; 7nwh; 5lzt; 5lzv; 5lzu; 7o80; 3jag; 3jai; 3jah; 6d90; 6zme; 3j5y; 5dmq; 3e1y; 6xa1; 4crn; 4crm; 4af1; 3vmf; 8hku	26	4d61; 4d5n; 6ip8; 5a8l; 7nwh; 5lzt; 5lzv; 5lzu; 7o80; 3jag; 3jai; 3jah; 6d90; 6zme; 3j5y; 1dt9; 5dmq; 3e1y; 6xa1; 4crn; 4crm; 2hst; 4af1; 3vmf; 3agk; 8hku
					eukaryotic peptide chain release factor gtp-binding subunit	polypeptide(L)		6.66593	1	4crn	1	23	4d61; 4d5n; 6ip8; 5a8l; 7nwh; 5lzt; 5lzv; 5lzu; 7o80; 3jag; 3jai; 3jah; 6d90; 6zme; 3j5y; 5dmq; 3e1y; 6xa1; 4crn; 4crm; 4af1; 3vmf; 8hku	26	4d61; 4d5n; 6ip8; 5a8l; 7nwh; 5lzt; 5lzv; 5lzu; 7o80; 3jag; 3jai; 3jah; 6d90; 6zme; 3j5y; 1dt9; 5dmq; 3e1y; 6xa1; 4crn; 4crm; 2hst; 4af1; 3vmf; 3agk; 8hku
					magnesium ion	bound	MG	7.07114	1	7o80	1	23	4d61; 4d5n; 6ip8; 5a8l; 7nwh; 5lzt; 5lzv; 5lzu; 7o80; 3jag; 3jai; 3jah; 6d90; 6zme; 3j5y; 5dmq; 3e1y; 6xa1; 4crn; 4crm; 4af1; 3vmf; 8hku	26	4d61; 4d5n; 6ip8; 5a8l; 7nwh; 5lzt; 5lzv; 5lzu; 7o80; 3jag; 3jai; 3jah; 6d90; 6zme; 3j5y; 1dt9; 5dmq; 3e1y; 6xa1; 4crn; 4crm; 2hst; 4af1; 3vmf; 3agk; 8hku
					ribosomal protein ul16-like	polypeptide(L)		7.28623	1	6ip8	1	23	4d61; 4d5n; 6ip8; 5a8l; 7nwh; 5lzt; 5lzv; 5lzu; 7o80; 3jag; 3jai; 3jah; 6d90; 6zme; 3j5y; 5dmq; 3e1y; 6xa1; 4crn; 4crm; 4af1; 3vmf; 8hku	26	4d61; 4d5n; 6ip8; 5a8l; 7nwh; 5lzt; 5lzv; 5lzu; 7o80; 3jag; 3jai; 3jah; 6d90; 6zme; 3j5y; 1dt9; 5dmq; 3e1y; 6xa1; 4crn; 4crm; 2hst; 4af1; 3vmf; 3agk; 8hku
					sulfate ion	bound	SO4	2.42319	1	3vmf	1	23	4d61; 4d5n; 6ip8; 5a8l; 7nwh; 5lzt; 5lzv; 5lzu; 7o80; 3jag; 3jai; 3jah; 6d90; 6zme; 3j5y; 5dmq; 3e1y; 6xa1; 4crn; 4crm; 4af1; 3vmf; 8hku	26	4d61; 4d5n; 6ip8; 5a8l; 7nwh; 5lzt; 5lzv; 5lzu; 7o80; 3jag; 3jai; 3jah; 6d90; 6zme; 3j5y; 1dt9; 5dmq; 3e1y; 6xa1; 4crn; 4crm; 2hst; 4af1; 3vmf; 3agk; 8hku
			R68L	-6.847	18s ribosomal rna	polyribonucleotide		2.72596	13	4d61; 6ip8; 5a8l; 7nwh; 5lzt; 5lzv; 5lzu; 7o80; 3jag; 3jai; 3jah; 6d90; 6xa1	13	22	4d61; 4d5n; 6ip8; 5a8l; 7nwh; 5lzt; 5lzv; 5lzu; 7o80; 3jag; 3jai; 3jah; 6d90; 6zme; 3j5y; 5dmq; 3e1y; 6xa1; 4crn; 3e20; 4af1; 3vmf	28	4d61; 4d5n; 6ip8; 5a8l; 7nwh; 5lzt; 5lzv; 5lzu; 7o80; 3jag; 3jai; 3jah; 6d90; 6zme; 3j5y; 1dt9; 5dmq; 3e1y; 6xa1; 4crn; 3e20; 2mq9; 2lgt; 2llx; 2mq6; 4af1; 3vmf; 3agk
					messenger rna	polyribonucleotide		6.54314	6	6ip8; 5a8l; 3jag; 3jai; 3jah; 6xa1	6	22	4d61; 4d5n; 6ip8; 5a8l; 7nwh; 5lzt; 5lzv; 5lzu; 7o80; 3jag; 3jai; 3jah; 6d90; 6zme; 3j5y; 5dmq; 3e1y; 6xa1; 4crn; 3e20; 4af1; 3vmf	28	4d61; 4d5n; 6ip8; 5a8l; 7nwh; 5lzt; 5lzv; 5lzu; 7o80; 3jag; 3jai; 3jah; 6d90; 6zme; 3j5y; 1dt9; 5dmq; 3e1y; 6xa1; 4crn; 3e20; 2mq9; 2lgt; 2llx; 2mq6; 4af1; 3vmf; 3agk
					magnesium ion	bound	MG	5.63466	4	5lzt; 5lzv; 5lzu; 7o80	4	22	4d61; 4d5n; 6ip8; 5a8l; 7nwh; 5lzt; 5lzv; 5lzu; 7o80; 3jag; 3jai; 3jah; 6d90; 6zme; 3j5y; 5dmq; 3e1y; 6xa1; 4crn; 3e20; 4af1; 3vmf	28	4d61; 4d5n; 6ip8; 5a8l; 7nwh; 5lzt; 5lzv; 5lzu; 7o80; 3jag; 3jai; 3jah; 6d90; 6zme; 3j5y; 1dt9; 5dmq; 3e1y; 6xa1; 4crn; 3e20; 2mq9; 2lgt; 2llx; 2mq6; 4af1; 3vmf; 3agk
					mrna (uga stop codon)	polyribonucleotide		6.47616	3	5lzt; 5lzv; 5lzu	3	22	4d61; 4d5n; 6ip8; 5a8l; 7nwh; 5lzt; 5lzv; 5lzu; 7o80; 3jag; 3jai; 3jah; 6d90; 6zme; 3j5y; 5dmq; 3e1y; 6xa1; 4crn; 3e20; 4af1; 3vmf	28	4d61; 4d5n; 6ip8; 5a8l; 7nwh; 5lzt; 5lzv; 5lzu; 7o80; 3jag; 3jai; 3jah; 6d90; 6zme; 3j5y; 1dt9; 5dmq; 3e1y; 6xa1; 4crn; 3e20; 2mq9; 2lgt; 2llx; 2mq6; 4af1; 3vmf; 3agk
					28s ribosomal rna	polyribonucleotide		3.12346	1	6zme	1	22	4d61; 4d5n; 6ip8; 5a8l; 7nwh; 5lzt; 5lzv; 5lzu; 7o80; 3jag; 3jai; 3jah; 6d90; 6zme; 3j5y; 5dmq; 3e1y; 6xa1; 4crn; 3e20; 4af1; 3vmf	28	4d61; 4d5n; 6ip8; 5a8l; 7nwh; 5lzt; 5lzv; 5lzu; 7o80; 3jag; 3jai; 3jah; 6d90; 6zme; 3j5y; 1dt9; 5dmq; 3e1y; 6xa1; 4crn; 3e20; 2mq9; 2lgt; 2llx; 2mq6; 4af1; 3vmf; 3agk
					5'-r(*ap*up*up*gp*up*ap*ap*ap*ap*a)-3'	polyribonucleotide		7.57639	1	3j5y	1	22	4d61; 4d5n; 6ip8; 5a8l; 7nwh; 5lzt; 5lzv; 5lzu; 7o80; 3jag; 3jai; 3jah; 6d90; 6zme; 3j5y; 5dmq; 3e1y; 6xa1; 4crn; 3e20; 4af1; 3vmf	28	4d61; 4d5n; 6ip8; 5a8l; 7nwh; 5lzt; 5lzv; 5lzu; 7o80; 3jag; 3jai; 3jah; 6d90; 6zme; 3j5y; 1dt9; 5dmq; 3e1y; 6xa1; 4crn; 3e20; 2mq9; 2lgt; 2llx; 2mq6; 4af1; 3vmf; 3agk
					crpv-ires	polyribonucleotide		7.14085	1	6d90	1	22	4d61; 4d5n; 6ip8; 5a8l; 7nwh; 5lzt; 5lzv; 5lzu; 7o80; 3jag; 3jai; 3jah; 6d90; 6zme; 3j5y; 5dmq; 3e1y; 6xa1; 4crn; 3e20; 4af1; 3vmf	28	4d61; 4d5n; 6ip8; 5a8l; 7nwh; 5lzt; 5lzv; 5lzu; 7o80; 3jag; 3jai; 3jah; 6d90; 6zme; 3j5y; 1dt9; 5dmq; 3e1y; 6xa1; 4crn; 3e20; 2mq9; 2lgt; 2llx; 2mq6; 4af1; 3vmf; 3agk
					mrna containing sars-cov-2 sequence	polyribonucleotide		6.38401	1	7o80	1	22	4d61; 4d5n; 6ip8; 5a8l; 7nwh; 5lzt; 5lzv; 5lzu; 7o80; 3jag; 3jai; 3jah; 6d90; 6zme; 3j5y; 5dmq; 3e1y; 6xa1; 4crn; 3e20; 4af1; 3vmf	28	4d61; 4d5n; 6ip8; 5a8l; 7nwh; 5lzt; 5lzv; 5lzu; 7o80; 3jag; 3jai; 3jah; 6d90; 6zme; 3j5y; 1dt9; 5dmq; 3e1y; 6xa1; 4crn; 3e20; 2mq9; 2lgt; 2llx; 2mq6; 4af1; 3vmf; 3agk
					adenosine-5'-triphosphate	bound	ATP	7.96714	1	3e1y	1	22	4d61; 4d5n; 6ip8; 5a8l; 7nwh; 5lzt; 5lzv; 5lzu; 7o80; 3jag; 3jai; 3jah; 6d90; 6zme; 3j5y; 5dmq; 3e1y; 6xa1; 4crn; 3e20; 4af1; 3vmf	28	4d61; 4d5n; 6ip8; 5a8l; 7nwh; 5lzt; 5lzv; 5lzu; 7o80; 3jag; 3jai; 3jah; 6d90; 6zme; 3j5y; 1dt9; 5dmq; 3e1y; 6xa1; 4crn; 3e20; 2mq9; 2lgt; 2llx; 2mq6; 4af1; 3vmf; 3agk
					cricket paralysis virus ires rna	polyribonucleotide		7.31648	1	4d5n	1	22	4d61; 4d5n; 6ip8; 5a8l; 7nwh; 5lzt; 5lzv; 5lzu; 7o80; 3jag; 3jai; 3jah; 6d90; 6zme; 3j5y; 5dmq; 3e1y; 6xa1; 4crn; 3e20; 4af1; 3vmf	28	4d61; 4d5n; 6ip8; 5a8l; 7nwh; 5lzt; 5lzv; 5lzu; 7o80; 3jag; 3jai; 3jah; 6d90; 6zme; 3j5y; 1dt9; 5dmq; 3e1y; 6xa1; 4crn; 3e20; 2mq9; 2lgt; 2llx; 2mq6; 4af1; 3vmf; 3agk
			I21M	-5.066	40s ribosomal protein s15	polypeptide(L)		6.86893	1	7o80	1	22	4d61; 4d5n; 6ip8; 5a8l; 7nwh; 5lzt; 5lzv; 5lzu; 7o80; 3jag; 3jai; 3jah; 6d90; 6zme; 3j5y; 5dmq; 3e1y; 6xa1; 4crn; 3e20; 4af1; 3vmf	28	4d61; 4d5n; 6ip8; 5a8l; 7nwh; 5lzt; 5lzv; 5lzu; 7o80; 3jag; 3jai; 3jah; 6d90; 6zme; 3j5y; 1dt9; 5dmq; 3e1y; 6xa1; 4crn; 3e20; 2mq9; 2lgt; 2llx; 2mq6; 4af1; 3vmf; 3agk
					small ribosomal subunit protein us19	polypeptide(L)		6.3954	1	6xa1	1	22	4d61; 4d5n; 6ip8; 5a8l; 7nwh; 5lzt; 5lzv; 5lzu; 7o80; 3jag; 3jai; 3jah; 6d90; 6zme; 3j5y; 5dmq; 3e1y; 6xa1; 4crn; 3e20; 4af1; 3vmf	28	4d61; 4d5n; 6ip8; 5a8l; 7nwh; 5lzt; 5lzv; 5lzu; 7o80; 3jag; 3jai; 3jah; 6d90; 6zme; 3j5y; 1dt9; 5dmq; 3e1y; 6xa1; 4crn; 3e20; 2mq9; 2lgt; 2llx; 2mq6; 4af1; 3vmf; 3agk
1	RBBP4	NP_005601.1	H373R	-6.819	polycomb protein suz12	polypeptide(L)		5.47306	9	5wai; 6wkr; 5wak; 7ktp; 7kso; 6c23; 6c24; 6nq3; 7ksr	9	51	6zrd; 7y5k; 7r1d; 7y5o; 7y5l; 4pc0; 4pby; 8iqf; 7m40; 7y5u; 7y5v; 8iqg; 7n40; 5wai; 6wkr; 5wak; 6g16; 7ktp; 7kso; 6c23; 6c24; 4pbz; 7aoa; 5y1u; 6nq3; 6zrc; 5fxy; 5xwr; 5xxq; 6bw4; 6bw3; 2xu7; 7ksr; 4r7a; 2yba; 3c9c; 3c99; 2xyi; 2yb8; 5vtb; 3cfv; 3cfs; 6s29; 6s1r; 5wjc; 4xyi; 8i03; 8i02; 4psw; 7xay; 4psx	55	6zrd; 7y5k; 7r1d; 7y5o; 7y5l; 4pc0; 4pby; 8iqf; 7m40; 7y5u; 7y5v; 8iqg; 7n40; 5wai; 6wkr; 5wak; 6g16; 7ktp; 7kso; 6c23; 6c24; 4pbz; 7aoa; 5y1u; 6nq3; 6zrc; 5fxy; 5xwr; 5xxq; 6bw4; 6bw3; 2xu7; 7ksr; 4r7a; 2yba; 3c9c; 3c99; 2xyi; 2yb8; 5vtb; 3cfv; 3cfs; 7m3x; 3gfc; 6s29; 6s1r; 5wjc; 6s1l; 4xyh; 4xyi; 8i03; 8i02; 4psw; 7xay; 4psx
					metastasis-associated protein mta1	polypeptide(L)		3.77908	8	6zrd; 4pc0; 4pby; 6g16; 4pbz; 7aoa; 6zrc; 5fxy	8	51	6zrd; 7y5k; 7r1d; 7y5o; 7y5l; 4pc0; 4pby; 8iqf; 7m40; 7y5u; 7y5v; 8iqg; 7n40; 5wai; 6wkr; 5wak; 6g16; 7ktp; 7kso; 6c23; 6c24; 4pbz; 7aoa; 5y1u; 6nq3; 6zrc; 5fxy; 5xwr; 5xxq; 6bw4; 6bw3; 2xu7; 7ksr; 4r7a; 2yba; 3c9c; 3c99; 2xyi; 2yb8; 5vtb; 3cfv; 3cfs; 6s29; 6s1r; 5wjc; 4xyi; 8i03; 8i02; 4psw; 7xay; 4psx	55	6zrd; 7y5k; 7r1d; 7y5o; 7y5l; 4pc0; 4pby; 8iqf; 7m40; 7y5u; 7y5v; 8iqg; 7n40; 5wai; 6wkr; 5wak; 6g16; 7ktp; 7kso; 6c23; 6c24; 4pbz; 7aoa; 5y1u; 6nq3; 6zrc; 5fxy; 5xwr; 5xxq; 6bw4; 6bw3; 2xu7; 7ksr; 4r7a; 2yba; 3c9c; 3c99; 2xyi; 2yb8; 5vtb; 3cfv; 3cfs; 7m3x; 3gfc; 6s29; 6s1r; 5wjc; 6s1l; 4xyh; 4xyi; 8i03; 8i02; 4psw; 7xay; 4psx
					chromatin assembly factor 1 subunit a	polypeptide(L)		6.07626	5	7y5k; 7y5o; 7y5l; 7y5u; 8iqg	5	51	6zrd; 7y5k; 7r1d; 7y5o; 7y5l; 4pc0; 4pby; 8iqf; 7m40; 7y5u; 7y5v; 8iqg; 7n40; 5wai; 6wkr; 5wak; 6g16; 7ktp; 7kso; 6c23; 6c24; 4pbz; 7aoa; 5y1u; 6nq3; 6zrc; 5fxy; 5xwr; 5xxq; 6bw4; 6bw3; 2xu7; 7ksr; 4r7a; 2yba; 3c9c; 3c99; 2xyi; 2yb8; 5vtb; 3cfv; 3cfs; 6s29; 6s1r; 5wjc; 4xyi; 8i03; 8i02; 4psw; 7xay; 4psx	55	6zrd; 7y5k; 7r1d; 7y5o; 7y5l; 4pc0; 4pby; 8iqf; 7m40; 7y5u; 7y5v; 8iqg; 7n40; 5wai; 6wkr; 5wak; 6g16; 7ktp; 7kso; 6c23; 6c24; 4pbz; 7aoa; 5y1u; 6nq3; 6zrc; 5fxy; 5xwr; 5xxq; 6bw4; 6bw3; 2xu7; 7ksr; 4r7a; 2yba; 3c9c; 3c99; 2xyi; 2yb8; 5vtb; 3cfv; 3cfs; 7m3x; 3gfc; 6s29; 6s1r; 5wjc; 6s1l; 4xyh; 4xyi; 8i03; 8i02; 4psw; 7xay; 4psx
					protein lin-9 homolog	polypeptide(L)		6.64496	2	7r1d; 7n40	2	51	6zrd; 7y5k; 7r1d; 7y5o; 7y5l; 4pc0; 4pby; 8iqf; 7m40; 7y5u; 7y5v; 8iqg; 7n40; 5wai; 6wkr; 5wak; 6g16; 7ktp; 7kso; 6c23; 6c24; 4pbz; 7aoa; 5y1u; 6nq3; 6zrc; 5fxy; 5xwr; 5xxq; 6bw4; 6bw3; 2xu7; 7ksr; 4r7a; 2yba; 3c9c; 3c99; 2xyi; 2yb8; 5vtb; 3cfv; 3cfs; 6s29; 6s1r; 5wjc; 4xyi; 8i03; 8i02; 4psw; 7xay; 4psx	55	6zrd; 7y5k; 7r1d; 7y5o; 7y5l; 4pc0; 4pby; 8iqf; 7m40; 7y5u; 7y5v; 8iqg; 7n40; 5wai; 6wkr; 5wak; 6g16; 7ktp; 7kso; 6c23; 6c24; 4pbz; 7aoa; 5y1u; 6nq3; 6zrc; 5fxy; 5xwr; 5xxq; 6bw4; 6bw3; 2xu7; 7ksr; 4r7a; 2yba; 3c9c; 3c99; 2xyi; 2yb8; 5vtb; 3cfv; 3cfs; 7m3x; 3gfc; 6s29; 6s1r; 5wjc; 6s1l; 4xyh; 4xyi; 8i03; 8i02; 4psw; 7xay; 4psx
					paired amphipathic helix protein pst2	polypeptide(L)		6.9947	1	8i02	1	51	6zrd; 7y5k; 7r1d; 7y5o; 7y5l; 4pc0; 4pby; 8iqf; 7m40; 7y5u; 7y5v; 8iqg; 7n40; 5wai; 6wkr; 5wak; 6g16; 7ktp; 7kso; 6c23; 6c24; 4pbz; 7aoa; 5y1u; 6nq3; 6zrc; 5fxy; 5xwr; 5xxq; 6bw4; 6bw3; 2xu7; 7ksr; 4r7a; 2yba; 3c9c; 3c99; 2xyi; 2yb8; 5vtb; 3cfv; 3cfs; 6s29; 6s1r; 5wjc; 4xyi; 8i03; 8i02; 4psw; 7xay; 4psx	55	6zrd; 7y5k; 7r1d; 7y5o; 7y5l; 4pc0; 4pby; 8iqf; 7m40; 7y5u; 7y5v; 8iqg; 7n40; 5wai; 6wkr; 5wak; 6g16; 7ktp; 7kso; 6c23; 6c24; 4pbz; 7aoa; 5y1u; 6nq3; 6zrc; 5fxy; 5xwr; 5xxq; 6bw4; 6bw3; 2xu7; 7ksr; 4r7a; 2yba; 3c9c; 3c99; 2xyi; 2yb8; 5vtb; 3cfv; 3cfs; 7m3x; 3gfc; 6s29; 6s1r; 5wjc; 6s1l; 4xyh; 4xyi; 8i03; 8i02; 4psw; 7xay; 4psx
					paired amphipathic helix protein pst3	polypeptide(L)		7.30636	1	8i03	1	51	6zrd; 7y5k; 7r1d; 7y5o; 7y5l; 4pc0; 4pby; 8iqf; 7m40; 7y5u; 7y5v; 8iqg; 7n40; 5wai; 6wkr; 5wak; 6g16; 7ktp; 7kso; 6c23; 6c24; 4pbz; 7aoa; 5y1u; 6nq3; 6zrc; 5fxy; 5xwr; 5xxq; 6bw4; 6bw3; 2xu7; 7ksr; 4r7a; 2yba; 3c9c; 3c99; 2xyi; 2yb8; 5vtb; 3cfv; 3cfs; 6s29; 6s1r; 5wjc; 4xyi; 8i03; 8i02; 4psw; 7xay; 4psx	55	6zrd; 7y5k; 7r1d; 7y5o; 7y5l; 4pc0; 4pby; 8iqf; 7m40; 7y5u; 7y5v; 8iqg; 7n40; 5wai; 6wkr; 5wak; 6g16; 7ktp; 7kso; 6c23; 6c24; 4pbz; 7aoa; 5y1u; 6nq3; 6zrc; 5fxy; 5xwr; 5xxq; 6bw4; 6bw3; 2xu7; 7ksr; 4r7a; 2yba; 3c9c; 3c99; 2xyi; 2yb8; 5vtb; 3cfv; 3cfs; 7m3x; 3gfc; 6s29; 6s1r; 5wjc; 6s1l; 4xyh; 4xyi; 8i03; 8i02; 4psw; 7xay; 4psx
					histone h3	polypeptide(L)		5.68055	1	2yba	1	51	6zrd; 7y5k; 7r1d; 7y5o; 7y5l; 4pc0; 4pby; 8iqf; 7m40; 7y5u; 7y5v; 8iqg; 7n40; 5wai; 6wkr; 5wak; 6g16; 7ktp; 7kso; 6c23; 6c24; 4pbz; 7aoa; 5y1u; 6nq3; 6zrc; 5fxy; 5xwr; 5xxq; 6bw4; 6bw3; 2xu7; 7ksr; 4r7a; 2yba; 3c9c; 3c99; 2xyi; 2yb8; 5vtb; 3cfv; 3cfs; 6s29; 6s1r; 5wjc; 4xyi; 8i03; 8i02; 4psw; 7xay; 4psx	55	6zrd; 7y5k; 7r1d; 7y5o; 7y5l; 4pc0; 4pby; 8iqf; 7m40; 7y5u; 7y5v; 8iqg; 7n40; 5wai; 6wkr; 5wak; 6g16; 7ktp; 7kso; 6c23; 6c24; 4pbz; 7aoa; 5y1u; 6nq3; 6zrc; 5fxy; 5xwr; 5xxq; 6bw4; 6bw3; 2xu7; 7ksr; 4r7a; 2yba; 3c9c; 3c99; 2xyi; 2yb8; 5vtb; 3cfv; 3cfs; 7m3x; 3gfc; 6s29; 6s1r; 5wjc; 6s1l; 4xyh; 4xyi; 8i03; 8i02; 4psw; 7xay; 4psx
					histone h4	polypeptide(L)		7.55692	1	6s1r	1	51	6zrd; 7y5k; 7r1d; 7y5o; 7y5l; 4pc0; 4pby; 8iqf; 7m40; 7y5u; 7y5v; 8iqg; 7n40; 5wai; 6wkr; 5wak; 6g16; 7ktp; 7kso; 6c23; 6c24; 4pbz; 7aoa; 5y1u; 6nq3; 6zrc; 5fxy; 5xwr; 5xxq; 6bw4; 6bw3; 2xu7; 7ksr; 4r7a; 2yba; 3c9c; 3c99; 2xyi; 2yb8; 5vtb; 3cfv; 3cfs; 6s29; 6s1r; 5wjc; 4xyi; 8i03; 8i02; 4psw; 7xay; 4psx	55	6zrd; 7y5k; 7r1d; 7y5o; 7y5l; 4pc0; 4pby; 8iqf; 7m40; 7y5u; 7y5v; 8iqg; 7n40; 5wai; 6wkr; 5wak; 6g16; 7ktp; 7kso; 6c23; 6c24; 4pbz; 7aoa; 5y1u; 6nq3; 6zrc; 5fxy; 5xwr; 5xxq; 6bw4; 6bw3; 2xu7; 7ksr; 4r7a; 2yba; 3c9c; 3c99; 2xyi; 2yb8; 5vtb; 3cfv; 3cfs; 7m3x; 3gfc; 6s29; 6s1r; 5wjc; 6s1l; 4xyh; 4xyi; 8i03; 8i02; 4psw; 7xay; 4psx
					zinc finger protein aebp2	polypeptide(L)		7.96516	1	6c24	1	51	6zrd; 7y5k; 7r1d; 7y5o; 7y5l; 4pc0; 4pby; 8iqf; 7m40; 7y5u; 7y5v; 8iqg; 7n40; 5wai; 6wkr; 5wak; 6g16; 7ktp; 7kso; 6c23; 6c24; 4pbz; 7aoa; 5y1u; 6nq3; 6zrc; 5fxy; 5xwr; 5xxq; 6bw4; 6bw3; 2xu7; 7ksr; 4r7a; 2yba; 3c9c; 3c99; 2xyi; 2yb8; 5vtb; 3cfv; 3cfs; 6s29; 6s1r; 5wjc; 4xyi; 8i03; 8i02; 4psw; 7xay; 4psx	55	6zrd; 7y5k; 7r1d; 7y5o; 7y5l; 4pc0; 4pby; 8iqf; 7m40; 7y5u; 7y5v; 8iqg; 7n40; 5wai; 6wkr; 5wak; 6g16; 7ktp; 7kso; 6c23; 6c24; 4pbz; 7aoa; 5y1u; 6nq3; 6zrc; 5fxy; 5xwr; 5xxq; 6bw4; 6bw3; 2xu7; 7ksr; 4r7a; 2yba; 3c9c; 3c99; 2xyi; 2yb8; 5vtb; 3cfv; 3cfs; 7m3x; 3gfc; 6s29; 6s1r; 5wjc; 6s1l; 4xyh; 4xyi; 8i03; 8i02; 4psw; 7xay; 4psx
			T155I	-5.983	chromatin assembly factor 1 subunit a	polypeptide(L)		6.19048	3	7y5k; 7y5o; 7y5l	3	51	6zrd; 7y5k; 7r1d; 7y5o; 7y5l; 4pc0; 4pby; 8iqf; 7m40; 7y5u; 7y5v; 8iqg; 7n40; 5wai; 6wkr; 5wak; 6g16; 7ktp; 7kso; 6c23; 6c24; 4pbz; 7aoa; 5y1u; 6nq3; 6zrc; 5fxy; 5xwr; 5xxq; 6bw4; 6bw3; 2xu7; 7ksr; 4r7a; 2yba; 3c9c; 3c99; 2xyi; 2yb8; 5vtb; 3cfv; 3cfs; 6s29; 6s1r; 5wjc; 4xyi; 8i03; 8i02; 4psw; 7xay; 4psx	55	6zrd; 7y5k; 7r1d; 7y5o; 7y5l; 4pc0; 4pby; 8iqf; 7m40; 7y5u; 7y5v; 8iqg; 7n40; 5wai; 6wkr; 5wak; 6g16; 7ktp; 7kso; 6c23; 6c24; 4pbz; 7aoa; 5y1u; 6nq3; 6zrc; 5fxy; 5xwr; 5xxq; 6bw4; 6bw3; 2xu7; 7ksr; 4r7a; 2yba; 3c9c; 3c99; 2xyi; 2yb8; 5vtb; 3cfv; 3cfs; 7m3x; 3gfc; 6s29; 6s1r; 5wjc; 6s1l; 4xyh; 4xyi; 8i03; 8i02; 4psw; 7xay; 4psx
					zinc finger protein zfpm1	polypeptide(L)		2.89909	1	2xu7	1	51	6zrd; 7y5k; 7r1d; 7y5o; 7y5l; 4pc0; 4pby; 8iqf; 7m40; 7y5u; 7y5v; 8iqg; 7n40; 5wai; 6wkr; 5wak; 6g16; 7ktp; 7kso; 6c23; 6c24; 4pbz; 7aoa; 5y1u; 6nq3; 6zrc; 5fxy; 5xwr; 5xxq; 6bw4; 6bw3; 2xu7; 7ksr; 4r7a; 2yba; 3c9c; 3c99; 2xyi; 2yb8; 5vtb; 3cfv; 3cfs; 6s29; 6s1r; 5wjc; 4xyi; 8i03; 8i02; 4psw; 7xay; 4psx	55	6zrd; 7y5k; 7r1d; 7y5o; 7y5l; 4pc0; 4pby; 8iqf; 7m40; 7y5u; 7y5v; 8iqg; 7n40; 5wai; 6wkr; 5wak; 6g16; 7ktp; 7kso; 6c23; 6c24; 4pbz; 7aoa; 5y1u; 6nq3; 6zrc; 5fxy; 5xwr; 5xxq; 6bw4; 6bw3; 2xu7; 7ksr; 4r7a; 2yba; 3c9c; 3c99; 2xyi; 2yb8; 5vtb; 3cfv; 3cfs; 7m3x; 3gfc; 6s29; 6s1r; 5wjc; 6s1l; 4xyh; 4xyi; 8i03; 8i02; 4psw; 7xay; 4psx
					cadmium ion	bound	CD	5.09587	1	3c9c	1	51	6zrd; 7y5k; 7r1d; 7y5o; 7y5l; 4pc0; 4pby; 8iqf; 7m40; 7y5u; 7y5v; 8iqg; 7n40; 5wai; 6wkr; 5wak; 6g16; 7ktp; 7kso; 6c23; 6c24; 4pbz; 7aoa; 5y1u; 6nq3; 6zrc; 5fxy; 5xwr; 5xxq; 6bw4; 6bw3; 2xu7; 7ksr; 4r7a; 2yba; 3c9c; 3c99; 2xyi; 2yb8; 5vtb; 3cfv; 3cfs; 6s29; 6s1r; 5wjc; 4xyi; 8i03; 8i02; 4psw; 7xay; 4psx	55	6zrd; 7y5k; 7r1d; 7y5o; 7y5l; 4pc0; 4pby; 8iqf; 7m40; 7y5u; 7y5v; 8iqg; 7n40; 5wai; 6wkr; 5wak; 6g16; 7ktp; 7kso; 6c23; 6c24; 4pbz; 7aoa; 5y1u; 6nq3; 6zrc; 5fxy; 5xwr; 5xxq; 6bw4; 6bw3; 2xu7; 7ksr; 4r7a; 2yba; 3c9c; 3c99; 2xyi; 2yb8; 5vtb; 3cfv; 3cfs; 7m3x; 3gfc; 6s29; 6s1r; 5wjc; 6s1l; 4xyh; 4xyi; 8i03; 8i02; 4psw; 7xay; 4psx
					sal-like protein 4	polypeptide(L)		3.7653	1	5xwr	1	51	6zrd; 7y5k; 7r1d; 7y5o; 7y5l; 4pc0; 4pby; 8iqf; 7m40; 7y5u; 7y5v; 8iqg; 7n40; 5wai; 6wkr; 5wak; 6g16; 7ktp; 7kso; 6c23; 6c24; 4pbz; 7aoa; 5y1u; 6nq3; 6zrc; 5fxy; 5xwr; 5xxq; 6bw4; 6bw3; 2xu7; 7ksr; 4r7a; 2yba; 3c9c; 3c99; 2xyi; 2yb8; 5vtb; 3cfv; 3cfs; 6s29; 6s1r; 5wjc; 4xyi; 8i03; 8i02; 4psw; 7xay; 4psx	55	6zrd; 7y5k; 7r1d; 7y5o; 7y5l; 4pc0; 4pby; 8iqf; 7m40; 7y5u; 7y5v; 8iqg; 7n40; 5wai; 6wkr; 5wak; 6g16; 7ktp; 7kso; 6c23; 6c24; 4pbz; 7aoa; 5y1u; 6nq3; 6zrc; 5fxy; 5xwr; 5xxq; 6bw4; 6bw3; 2xu7; 7ksr; 4r7a; 2yba; 3c9c; 3c99; 2xyi; 2yb8; 5vtb; 3cfv; 3cfs; 7m3x; 3gfc; 6s29; 6s1r; 5wjc; 6s1l; 4xyh; 4xyi; 8i03; 8i02; 4psw; 7xay; 4psx
					zinc finger protein 827	polypeptide(L)		5.63388	1	5xxq	1	51	6zrd; 7y5k; 7r1d; 7y5o; 7y5l; 4pc0; 4pby; 8iqf; 7m40; 7y5u; 7y5v; 8iqg; 7n40; 5wai; 6wkr; 5wak; 6g16; 7ktp; 7kso; 6c23; 6c24; 4pbz; 7aoa; 5y1u; 6nq3; 6zrc; 5fxy; 5xwr; 5xxq; 6bw4; 6bw3; 2xu7; 7ksr; 4r7a; 2yba; 3c9c; 3c99; 2xyi; 2yb8; 5vtb; 3cfv; 3cfs; 6s29; 6s1r; 5wjc; 4xyi; 8i03; 8i02; 4psw; 7xay; 4psx	55	6zrd; 7y5k; 7r1d; 7y5o; 7y5l; 4pc0; 4pby; 8iqf; 7m40; 7y5u; 7y5v; 8iqg; 7n40; 5wai; 6wkr; 5wak; 6g16; 7ktp; 7kso; 6c23; 6c24; 4pbz; 7aoa; 5y1u; 6nq3; 6zrc; 5fxy; 5xwr; 5xxq; 6bw4; 6bw3; 2xu7; 7ksr; 4r7a; 2yba; 3c9c; 3c99; 2xyi; 2yb8; 5vtb; 3cfv; 3cfs; 7m3x; 3gfc; 6s29; 6s1r; 5wjc; 6s1l; 4xyh; 4xyi; 8i03; 8i02; 4psw; 7xay; 4psx
					zinc finger protein aebp2	polypeptide(L)		6.28082	1	5y1u	1	51	6zrd; 7y5k; 7r1d; 7y5o; 7y5l; 4pc0; 4pby; 8iqf; 7m40; 7y5u; 7y5v; 8iqg; 7n40; 5wai; 6wkr; 5wak; 6g16; 7ktp; 7kso; 6c23; 6c24; 4pbz; 7aoa; 5y1u; 6nq3; 6zrc; 5fxy; 5xwr; 5xxq; 6bw4; 6bw3; 2xu7; 7ksr; 4r7a; 2yba; 3c9c; 3c99; 2xyi; 2yb8; 5vtb; 3cfv; 3cfs; 6s29; 6s1r; 5wjc; 4xyi; 8i03; 8i02; 4psw; 7xay; 4psx	55	6zrd; 7y5k; 7r1d; 7y5o; 7y5l; 4pc0; 4pby; 8iqf; 7m40; 7y5u; 7y5v; 8iqg; 7n40; 5wai; 6wkr; 5wak; 6g16; 7ktp; 7kso; 6c23; 6c24; 4pbz; 7aoa; 5y1u; 6nq3; 6zrc; 5fxy; 5xwr; 5xxq; 6bw4; 6bw3; 2xu7; 7ksr; 4r7a; 2yba; 3c9c; 3c99; 2xyi; 2yb8; 5vtb; 3cfv; 3cfs; 7m3x; 3gfc; 6s29; 6s1r; 5wjc; 6s1l; 4xyh; 4xyi; 8i03; 8i02; 4psw; 7xay; 4psx
					histone-lysine n-methyltransferase mecom	polypeptide(L)		5.38467	1	6bw3	1	51	6zrd; 7y5k; 7r1d; 7y5o; 7y5l; 4pc0; 4pby; 8iqf; 7m40; 7y5u; 7y5v; 8iqg; 7n40; 5wai; 6wkr; 5wak; 6g16; 7ktp; 7kso; 6c23; 6c24; 4pbz; 7aoa; 5y1u; 6nq3; 6zrc; 5fxy; 5xwr; 5xxq; 6bw4; 6bw3; 2xu7; 7ksr; 4r7a; 2yba; 3c9c; 3c99; 2xyi; 2yb8; 5vtb; 3cfv; 3cfs; 6s29; 6s1r; 5wjc; 4xyi; 8i03; 8i02; 4psw; 7xay; 4psx	55	6zrd; 7y5k; 7r1d; 7y5o; 7y5l; 4pc0; 4pby; 8iqf; 7m40; 7y5u; 7y5v; 8iqg; 7n40; 5wai; 6wkr; 5wak; 6g16; 7ktp; 7kso; 6c23; 6c24; 4pbz; 7aoa; 5y1u; 6nq3; 6zrc; 5fxy; 5xwr; 5xxq; 6bw4; 6bw3; 2xu7; 7ksr; 4r7a; 2yba; 3c9c; 3c99; 2xyi; 2yb8; 5vtb; 3cfv; 3cfs; 7m3x; 3gfc; 6s29; 6s1r; 5wjc; 6s1l; 4xyh; 4xyi; 8i03; 8i02; 4psw; 7xay; 4psx
					histone-lysine n-methyltransferase prdm16	polypeptide(L)		5.62364	1	6bw4	1	51	6zrd; 7y5k; 7r1d; 7y5o; 7y5l; 4pc0; 4pby; 8iqf; 7m40; 7y5u; 7y5v; 8iqg; 7n40; 5wai; 6wkr; 5wak; 6g16; 7ktp; 7kso; 6c23; 6c24; 4pbz; 7aoa; 5y1u; 6nq3; 6zrc; 5fxy; 5xwr; 5xxq; 6bw4; 6bw3; 2xu7; 7ksr; 4r7a; 2yba; 3c9c; 3c99; 2xyi; 2yb8; 5vtb; 3cfv; 3cfs; 6s29; 6s1r; 5wjc; 4xyi; 8i03; 8i02; 4psw; 7xay; 4psx	55	6zrd; 7y5k; 7r1d; 7y5o; 7y5l; 4pc0; 4pby; 8iqf; 7m40; 7y5u; 7y5v; 8iqg; 7n40; 5wai; 6wkr; 5wak; 6g16; 7ktp; 7kso; 6c23; 6c24; 4pbz; 7aoa; 5y1u; 6nq3; 6zrc; 5fxy; 5xwr; 5xxq; 6bw4; 6bw3; 2xu7; 7ksr; 4r7a; 2yba; 3c9c; 3c99; 2xyi; 2yb8; 5vtb; 3cfv; 3cfs; 7m3x; 3gfc; 6s29; 6s1r; 5wjc; 6s1l; 4xyh; 4xyi; 8i03; 8i02; 4psw; 7xay; 4psx
			R131C	-5.814	cadmium ion	bound	CD	3.67253	2	3c9c; 3c99	2	51	6zrd; 7y5k; 7r1d; 7y5o; 7y5l; 4pc0; 4pby; 8iqf; 7m40; 7y5u; 7y5v; 8iqg; 7n40; 5wai; 6wkr; 5wak; 6g16; 7ktp; 7kso; 6c23; 6c24; 4pbz; 7aoa; 5y1u; 6nq3; 6zrc; 5fxy; 5xwr; 5xxq; 6bw4; 6bw3; 2xu7; 7ksr; 4r7a; 2yba; 3c9c; 3c99; 2xyi; 2yb8; 5vtb; 3cfv; 3cfs; 6s29; 6s1r; 5wjc; 4xyi; 8i03; 8i02; 4psw; 7xay; 4psx	55	6zrd; 7y5k; 7r1d; 7y5o; 7y5l; 4pc0; 4pby; 8iqf; 7m40; 7y5u; 7y5v; 8iqg; 7n40; 5wai; 6wkr; 5wak; 6g16; 7ktp; 7kso; 6c23; 6c24; 4pbz; 7aoa; 5y1u; 6nq3; 6zrc; 5fxy; 5xwr; 5xxq; 6bw4; 6bw3; 2xu7; 7ksr; 4r7a; 2yba; 3c9c; 3c99; 2xyi; 2yb8; 5vtb; 3cfv; 3cfs; 7m3x; 3gfc; 6s29; 6s1r; 5wjc; 6s1l; 4xyh; 4xyi; 8i03; 8i02; 4psw; 7xay; 4psx
					sulfate ion	bound	SO4	2.59337	2	2yb8; 4psx	2	51	6zrd; 7y5k; 7r1d; 7y5o; 7y5l; 4pc0; 4pby; 8iqf; 7m40; 7y5u; 7y5v; 8iqg; 7n40; 5wai; 6wkr; 5wak; 6g16; 7ktp; 7kso; 6c23; 6c24; 4pbz; 7aoa; 5y1u; 6nq3; 6zrc; 5fxy; 5xwr; 5xxq; 6bw4; 6bw3; 2xu7; 7ksr; 4r7a; 2yba; 3c9c; 3c99; 2xyi; 2yb8; 5vtb; 3cfv; 3cfs; 6s29; 6s1r; 5wjc; 4xyi; 8i03; 8i02; 4psw; 7xay; 4psx	55	6zrd; 7y5k; 7r1d; 7y5o; 7y5l; 4pc0; 4pby; 8iqf; 7m40; 7y5u; 7y5v; 8iqg; 7n40; 5wai; 6wkr; 5wak; 6g16; 7ktp; 7kso; 6c23; 6c24; 4pbz; 7aoa; 5y1u; 6nq3; 6zrc; 5fxy; 5xwr; 5xxq; 6bw4; 6bw3; 2xu7; 7ksr; 4r7a; 2yba; 3c9c; 3c99; 2xyi; 2yb8; 5vtb; 3cfv; 3cfs; 7m3x; 3gfc; 6s29; 6s1r; 5wjc; 6s1l; 4xyh; 4xyi; 8i03; 8i02; 4psw; 7xay; 4psx
					bromide ion	bound	BR	3.91431	1	6s29	1	51	6zrd; 7y5k; 7r1d; 7y5o; 7y5l; 4pc0; 4pby; 8iqf; 7m40; 7y5u; 7y5v; 8iqg; 7n40; 5wai; 6wkr; 5wak; 6g16; 7ktp; 7kso; 6c23; 6c24; 4pbz; 7aoa; 5y1u; 6nq3; 6zrc; 5fxy; 5xwr; 5xxq; 6bw4; 6bw3; 2xu7; 7ksr; 4r7a; 2yba; 3c9c; 3c99; 2xyi; 2yb8; 5vtb; 3cfv; 3cfs; 6s29; 6s1r; 5wjc; 4xyi; 8i03; 8i02; 4psw; 7xay; 4psx	55	6zrd; 7y5k; 7r1d; 7y5o; 7y5l; 4pc0; 4pby; 8iqf; 7m40; 7y5u; 7y5v; 8iqg; 7n40; 5wai; 6wkr; 5wak; 6g16; 7ktp; 7kso; 6c23; 6c24; 4pbz; 7aoa; 5y1u; 6nq3; 6zrc; 5fxy; 5xwr; 5xxq; 6bw4; 6bw3; 2xu7; 7ksr; 4r7a; 2yba; 3c9c; 3c99; 2xyi; 2yb8; 5vtb; 3cfv; 3cfs; 7m3x; 3gfc; 6s29; 6s1r; 5wjc; 6s1l; 4xyh; 4xyi; 8i03; 8i02; 4psw; 7xay; 4psx
					n~3~-{4-[3-(dimethylamino)pyrrolidin-1-yl]-6,7-dimethoxyquinazolin-2-yl}-n~1~,n~1~-dimethylpropane-1,3-diamine	bound	YQJ	7.42724	1	7m40	1	51	6zrd; 7y5k; 7r1d; 7y5o; 7y5l; 4pc0; 4pby; 8iqf; 7m40; 7y5u; 7y5v; 8iqg; 7n40; 5wai; 6wkr; 5wak; 6g16; 7ktp; 7kso; 6c23; 6c24; 4pbz; 7aoa; 5y1u; 6nq3; 6zrc; 5fxy; 5xwr; 5xxq; 6bw4; 6bw3; 2xu7; 7ksr; 4r7a; 2yba; 3c9c; 3c99; 2xyi; 2yb8; 5vtb; 3cfv; 3cfs; 6s29; 6s1r; 5wjc; 4xyi; 8i03; 8i02; 4psw; 7xay; 4psx	55	6zrd; 7y5k; 7r1d; 7y5o; 7y5l; 4pc0; 4pby; 8iqf; 7m40; 7y5u; 7y5v; 8iqg; 7n40; 5wai; 6wkr; 5wak; 6g16; 7ktp; 7kso; 6c23; 6c24; 4pbz; 7aoa; 5y1u; 6nq3; 6zrc; 5fxy; 5xwr; 5xxq; 6bw4; 6bw3; 2xu7; 7ksr; 4r7a; 2yba; 3c9c; 3c99; 2xyi; 2yb8; 5vtb; 3cfv; 3cfs; 7m3x; 3gfc; 6s29; 6s1r; 5wjc; 6s1l; 4xyh; 4xyi; 8i03; 8i02; 4psw; 7xay; 4psx
					histone-lysine n-methyltransferase prdm16	polypeptide(L)		7.98037	1	6bw4	1	51	6zrd; 7y5k; 7r1d; 7y5o; 7y5l; 4pc0; 4pby; 8iqf; 7m40; 7y5u; 7y5v; 8iqg; 7n40; 5wai; 6wkr; 5wak; 6g16; 7ktp; 7kso; 6c23; 6c24; 4pbz; 7aoa; 5y1u; 6nq3; 6zrc; 5fxy; 5xwr; 5xxq; 6bw4; 6bw3; 2xu7; 7ksr; 4r7a; 2yba; 3c9c; 3c99; 2xyi; 2yb8; 5vtb; 3cfv; 3cfs; 6s29; 6s1r; 5wjc; 4xyi; 8i03; 8i02; 4psw; 7xay; 4psx	55	6zrd; 7y5k; 7r1d; 7y5o; 7y5l; 4pc0; 4pby; 8iqf; 7m40; 7y5u; 7y5v; 8iqg; 7n40; 5wai; 6wkr; 5wak; 6g16; 7ktp; 7kso; 6c23; 6c24; 4pbz; 7aoa; 5y1u; 6nq3; 6zrc; 5fxy; 5xwr; 5xxq; 6bw4; 6bw3; 2xu7; 7ksr; 4r7a; 2yba; 3c9c; 3c99; 2xyi; 2yb8; 5vtb; 3cfv; 3cfs; 7m3x; 3gfc; 6s29; 6s1r; 5wjc; 6s1l; 4xyh; 4xyi; 8i03; 8i02; 4psw; 7xay; 4psx
					polycomb protein suz12	polypeptide(L)		7.87477	1	5wak	1	51	6zrd; 7y5k; 7r1d; 7y5o; 7y5l; 4pc0; 4pby; 8iqf; 7m40; 7y5u; 7y5v; 8iqg; 7n40; 5wai; 6wkr; 5wak; 6g16; 7ktp; 7kso; 6c23; 6c24; 4pbz; 7aoa; 5y1u; 6nq3; 6zrc; 5fxy; 5xwr; 5xxq; 6bw4; 6bw3; 2xu7; 7ksr; 4r7a; 2yba; 3c9c; 3c99; 2xyi; 2yb8; 5vtb; 3cfv; 3cfs; 6s29; 6s1r; 5wjc; 4xyi; 8i03; 8i02; 4psw; 7xay; 4psx	55	6zrd; 7y5k; 7r1d; 7y5o; 7y5l; 4pc0; 4pby; 8iqf; 7m40; 7y5u; 7y5v; 8iqg; 7n40; 5wai; 6wkr; 5wak; 6g16; 7ktp; 7kso; 6c23; 6c24; 4pbz; 7aoa; 5y1u; 6nq3; 6zrc; 5fxy; 5xwr; 5xxq; 6bw4; 6bw3; 2xu7; 7ksr; 4r7a; 2yba; 3c9c; 3c99; 2xyi; 2yb8; 5vtb; 3cfv; 3cfs; 7m3x; 3gfc; 6s29; 6s1r; 5wjc; 6s1l; 4xyh; 4xyi; 8i03; 8i02; 4psw; 7xay; 4psx
					sal-like protein 4	polypeptide(L)		7.72951	1	5xwr	1	51	6zrd; 7y5k; 7r1d; 7y5o; 7y5l; 4pc0; 4pby; 8iqf; 7m40; 7y5u; 7y5v; 8iqg; 7n40; 5wai; 6wkr; 5wak; 6g16; 7ktp; 7kso; 6c23; 6c24; 4pbz; 7aoa; 5y1u; 6nq3; 6zrc; 5fxy; 5xwr; 5xxq; 6bw4; 6bw3; 2xu7; 7ksr; 4r7a; 2yba; 3c9c; 3c99; 2xyi; 2yb8; 5vtb; 3cfv; 3cfs; 6s29; 6s1r; 5wjc; 4xyi; 8i03; 8i02; 4psw; 7xay; 4psx	55	6zrd; 7y5k; 7r1d; 7y5o; 7y5l; 4pc0; 4pby; 8iqf; 7m40; 7y5u; 7y5v; 8iqg; 7n40; 5wai; 6wkr; 5wak; 6g16; 7ktp; 7kso; 6c23; 6c24; 4pbz; 7aoa; 5y1u; 6nq3; 6zrc; 5fxy; 5xwr; 5xxq; 6bw4; 6bw3; 2xu7; 7ksr; 4r7a; 2yba; 3c9c; 3c99; 2xyi; 2yb8; 5vtb; 3cfv; 3cfs; 7m3x; 3gfc; 6s29; 6s1r; 5wjc; 6s1l; 4xyh; 4xyi; 8i03; 8i02; 4psw; 7xay; 4psx
					zinc finger protein 827	polypeptide(L)		7.92699	1	5xxq	1	51	6zrd; 7y5k; 7r1d; 7y5o; 7y5l; 4pc0; 4pby; 8iqf; 7m40; 7y5u; 7y5v; 8iqg; 7n40; 5wai; 6wkr; 5wak; 6g16; 7ktp; 7kso; 6c23; 6c24; 4pbz; 7aoa; 5y1u; 6nq3; 6zrc; 5fxy; 5xwr; 5xxq; 6bw4; 6bw3; 2xu7; 7ksr; 4r7a; 2yba; 3c9c; 3c99; 2xyi; 2yb8; 5vtb; 3cfv; 3cfs; 6s29; 6s1r; 5wjc; 4xyi; 8i03; 8i02; 4psw; 7xay; 4psx	55	6zrd; 7y5k; 7r1d; 7y5o; 7y5l; 4pc0; 4pby; 8iqf; 7m40; 7y5u; 7y5v; 8iqg; 7n40; 5wai; 6wkr; 5wak; 6g16; 7ktp; 7kso; 6c23; 6c24; 4pbz; 7aoa; 5y1u; 6nq3; 6zrc; 5fxy; 5xwr; 5xxq; 6bw4; 6bw3; 2xu7; 7ksr; 4r7a; 2yba; 3c9c; 3c99; 2xyi; 2yb8; 5vtb; 3cfv; 3cfs; 7m3x; 3gfc; 6s29; 6s1r; 5wjc; 6s1l; 4xyh; 4xyi; 8i03; 8i02; 4psw; 7xay; 4psx
					zinc finger protein aebp2	polypeptide(L)		7.95078	1	5y1u	1	51	6zrd; 7y5k; 7r1d; 7y5o; 7y5l; 4pc0; 4pby; 8iqf; 7m40; 7y5u; 7y5v; 8iqg; 7n40; 5wai; 6wkr; 5wak; 6g16; 7ktp; 7kso; 6c23; 6c24; 4pbz; 7aoa; 5y1u; 6nq3; 6zrc; 5fxy; 5xwr; 5xxq; 6bw4; 6bw3; 2xu7; 7ksr; 4r7a; 2yba; 3c9c; 3c99; 2xyi; 2yb8; 5vtb; 3cfv; 3cfs; 6s29; 6s1r; 5wjc; 4xyi; 8i03; 8i02; 4psw; 7xay; 4psx	55	6zrd; 7y5k; 7r1d; 7y5o; 7y5l; 4pc0; 4pby; 8iqf; 7m40; 7y5u; 7y5v; 8iqg; 7n40; 5wai; 6wkr; 5wak; 6g16; 7ktp; 7kso; 6c23; 6c24; 4pbz; 7aoa; 5y1u; 6nq3; 6zrc; 5fxy; 5xwr; 5xxq; 6bw4; 6bw3; 2xu7; 7ksr; 4r7a; 2yba; 3c9c; 3c99; 2xyi; 2yb8; 5vtb; 3cfv; 3cfs; 7m3x; 3gfc; 6s29; 6s1r; 5wjc; 6s1l; 4xyh; 4xyi; 8i03; 8i02; 4psw; 7xay; 4psx
					zinc finger protein zfpm1	polypeptide(L)		7.8826	1	2xu7	1	51	6zrd; 7y5k; 7r1d; 7y5o; 7y5l; 4pc0; 4pby; 8iqf; 7m40; 7y5u; 7y5v; 8iqg; 7n40; 5wai; 6wkr; 5wak; 6g16; 7ktp; 7kso; 6c23; 6c24; 4pbz; 7aoa; 5y1u; 6nq3; 6zrc; 5fxy; 5xwr; 5xxq; 6bw4; 6bw3; 2xu7; 7ksr; 4r7a; 2yba; 3c9c; 3c99; 2xyi; 2yb8; 5vtb; 3cfv; 3cfs; 6s29; 6s1r; 5wjc; 4xyi; 8i03; 8i02; 4psw; 7xay; 4psx	55	6zrd; 7y5k; 7r1d; 7y5o; 7y5l; 4pc0; 4pby; 8iqf; 7m40; 7y5u; 7y5v; 8iqg; 7n40; 5wai; 6wkr; 5wak; 6g16; 7ktp; 7kso; 6c23; 6c24; 4pbz; 7aoa; 5y1u; 6nq3; 6zrc; 5fxy; 5xwr; 5xxq; 6bw4; 6bw3; 2xu7; 7ksr; 4r7a; 2yba; 3c9c; 3c99; 2xyi; 2yb8; 5vtb; 3cfv; 3cfs; 7m3x; 3gfc; 6s29; 6s1r; 5wjc; 6s1l; 4xyh; 4xyi; 8i03; 8i02; 4psw; 7xay; 4psx
			S378P	-5.455	zinc finger protein aebp2	polypeptide(L)		4.92893	5	5wai; 6wkr; 6c23; 6c24; 5y1u	5	51	6zrd; 7y5k; 7r1d; 7y5o; 7y5l; 4pc0; 4pby; 8iqf; 7m40; 7y5u; 7y5v; 8iqg; 7n40; 5wai; 6wkr; 5wak; 6g16; 7ktp; 7kso; 6c23; 6c24; 4pbz; 7aoa; 5y1u; 6nq3; 6zrc; 5fxy; 5xwr; 5xxq; 6bw4; 6bw3; 2xu7; 7ksr; 4r7a; 2yba; 3c9c; 3c99; 2xyi; 2yb8; 5vtb; 3cfv; 3cfs; 6s29; 6s1r; 5wjc; 4xyi; 8i03; 8i02; 4psw; 7xay; 4psx	55	6zrd; 7y5k; 7r1d; 7y5o; 7y5l; 4pc0; 4pby; 8iqf; 7m40; 7y5u; 7y5v; 8iqg; 7n40; 5wai; 6wkr; 5wak; 6g16; 7ktp; 7kso; 6c23; 6c24; 4pbz; 7aoa; 5y1u; 6nq3; 6zrc; 5fxy; 5xwr; 5xxq; 6bw4; 6bw3; 2xu7; 7ksr; 4r7a; 2yba; 3c9c; 3c99; 2xyi; 2yb8; 5vtb; 3cfv; 3cfs; 7m3x; 3gfc; 6s29; 6s1r; 5wjc; 6s1l; 4xyh; 4xyi; 8i03; 8i02; 4psw; 7xay; 4psx
					histone h3	polypeptide(L)		2.62751	3	2yba; 7xay; 4psx	1	51	6zrd; 7y5k; 7r1d; 7y5o; 7y5l; 4pc0; 4pby; 8iqf; 7m40; 7y5u; 7y5v; 8iqg; 7n40; 5wai; 6wkr; 5wak; 6g16; 7ktp; 7kso; 6c23; 6c24; 4pbz; 7aoa; 5y1u; 6nq3; 6zrc; 5fxy; 5xwr; 5xxq; 6bw4; 6bw3; 2xu7; 7ksr; 4r7a; 2yba; 3c9c; 3c99; 2xyi; 2yb8; 5vtb; 3cfv; 3cfs; 6s29; 6s1r; 5wjc; 4xyi; 8i03; 8i02; 4psw; 7xay; 4psx	55	6zrd; 7y5k; 7r1d; 7y5o; 7y5l; 4pc0; 4pby; 8iqf; 7m40; 7y5u; 7y5v; 8iqg; 7n40; 5wai; 6wkr; 5wak; 6g16; 7ktp; 7kso; 6c23; 6c24; 4pbz; 7aoa; 5y1u; 6nq3; 6zrc; 5fxy; 5xwr; 5xxq; 6bw4; 6bw3; 2xu7; 7ksr; 4r7a; 2yba; 3c9c; 3c99; 2xyi; 2yb8; 5vtb; 3cfv; 3cfs; 7m3x; 3gfc; 6s29; 6s1r; 5wjc; 6s1l; 4xyh; 4xyi; 8i03; 8i02; 4psw; 7xay; 4psx
					histone h3.1	polypeptide(L)		5.39456	2	7y5u; 8iqg	2	51	6zrd; 7y5k; 7r1d; 7y5o; 7y5l; 4pc0; 4pby; 8iqf; 7m40; 7y5u; 7y5v; 8iqg; 7n40; 5wai; 6wkr; 5wak; 6g16; 7ktp; 7kso; 6c23; 6c24; 4pbz; 7aoa; 5y1u; 6nq3; 6zrc; 5fxy; 5xwr; 5xxq; 6bw4; 6bw3; 2xu7; 7ksr; 4r7a; 2yba; 3c9c; 3c99; 2xyi; 2yb8; 5vtb; 3cfv; 3cfs; 6s29; 6s1r; 5wjc; 4xyi; 8i03; 8i02; 4psw; 7xay; 4psx	55	6zrd; 7y5k; 7r1d; 7y5o; 7y5l; 4pc0; 4pby; 8iqf; 7m40; 7y5u; 7y5v; 8iqg; 7n40; 5wai; 6wkr; 5wak; 6g16; 7ktp; 7kso; 6c23; 6c24; 4pbz; 7aoa; 5y1u; 6nq3; 6zrc; 5fxy; 5xwr; 5xxq; 6bw4; 6bw3; 2xu7; 7ksr; 4r7a; 2yba; 3c9c; 3c99; 2xyi; 2yb8; 5vtb; 3cfv; 3cfs; 7m3x; 3gfc; 6s29; 6s1r; 5wjc; 6s1l; 4xyh; 4xyi; 8i03; 8i02; 4psw; 7xay; 4psx
					histone-lysine n-methyltransferase mecom	polypeptide(L)		5.44414	1	6bw3	1	51	6zrd; 7y5k; 7r1d; 7y5o; 7y5l; 4pc0; 4pby; 8iqf; 7m40; 7y5u; 7y5v; 8iqg; 7n40; 5wai; 6wkr; 5wak; 6g16; 7ktp; 7kso; 6c23; 6c24; 4pbz; 7aoa; 5y1u; 6nq3; 6zrc; 5fxy; 5xwr; 5xxq; 6bw4; 6bw3; 2xu7; 7ksr; 4r7a; 2yba; 3c9c; 3c99; 2xyi; 2yb8; 5vtb; 3cfv; 3cfs; 6s29; 6s1r; 5wjc; 4xyi; 8i03; 8i02; 4psw; 7xay; 4psx	55	6zrd; 7y5k; 7r1d; 7y5o; 7y5l; 4pc0; 4pby; 8iqf; 7m40; 7y5u; 7y5v; 8iqg; 7n40; 5wai; 6wkr; 5wak; 6g16; 7ktp; 7kso; 6c23; 6c24; 4pbz; 7aoa; 5y1u; 6nq3; 6zrc; 5fxy; 5xwr; 5xxq; 6bw4; 6bw3; 2xu7; 7ksr; 4r7a; 2yba; 3c9c; 3c99; 2xyi; 2yb8; 5vtb; 3cfv; 3cfs; 7m3x; 3gfc; 6s29; 6s1r; 5wjc; 6s1l; 4xyh; 4xyi; 8i03; 8i02; 4psw; 7xay; 4psx
					histone-lysine n-methyltransferase prdm16	polypeptide(L)		5.54332	1	6bw4	1	51	6zrd; 7y5k; 7r1d; 7y5o; 7y5l; 4pc0; 4pby; 8iqf; 7m40; 7y5u; 7y5v; 8iqg; 7n40; 5wai; 6wkr; 5wak; 6g16; 7ktp; 7kso; 6c23; 6c24; 4pbz; 7aoa; 5y1u; 6nq3; 6zrc; 5fxy; 5xwr; 5xxq; 6bw4; 6bw3; 2xu7; 7ksr; 4r7a; 2yba; 3c9c; 3c99; 2xyi; 2yb8; 5vtb; 3cfv; 3cfs; 6s29; 6s1r; 5wjc; 4xyi; 8i03; 8i02; 4psw; 7xay; 4psx	55	6zrd; 7y5k; 7r1d; 7y5o; 7y5l; 4pc0; 4pby; 8iqf; 7m40; 7y5u; 7y5v; 8iqg; 7n40; 5wai; 6wkr; 5wak; 6g16; 7ktp; 7kso; 6c23; 6c24; 4pbz; 7aoa; 5y1u; 6nq3; 6zrc; 5fxy; 5xwr; 5xxq; 6bw4; 6bw3; 2xu7; 7ksr; 4r7a; 2yba; 3c9c; 3c99; 2xyi; 2yb8; 5vtb; 3cfv; 3cfs; 7m3x; 3gfc; 6s29; 6s1r; 5wjc; 6s1l; 4xyh; 4xyi; 8i03; 8i02; 4psw; 7xay; 4psx
					sal-like protein 4	polypeptide(L)		6.57948	1	5xwr	1	51	6zrd; 7y5k; 7r1d; 7y5o; 7y5l; 4pc0; 4pby; 8iqf; 7m40; 7y5u; 7y5v; 8iqg; 7n40; 5wai; 6wkr; 5wak; 6g16; 7ktp; 7kso; 6c23; 6c24; 4pbz; 7aoa; 5y1u; 6nq3; 6zrc; 5fxy; 5xwr; 5xxq; 6bw4; 6bw3; 2xu7; 7ksr; 4r7a; 2yba; 3c9c; 3c99; 2xyi; 2yb8; 5vtb; 3cfv; 3cfs; 6s29; 6s1r; 5wjc; 4xyi; 8i03; 8i02; 4psw; 7xay; 4psx	55	6zrd; 7y5k; 7r1d; 7y5o; 7y5l; 4pc0; 4pby; 8iqf; 7m40; 7y5u; 7y5v; 8iqg; 7n40; 5wai; 6wkr; 5wak; 6g16; 7ktp; 7kso; 6c23; 6c24; 4pbz; 7aoa; 5y1u; 6nq3; 6zrc; 5fxy; 5xwr; 5xxq; 6bw4; 6bw3; 2xu7; 7ksr; 4r7a; 2yba; 3c9c; 3c99; 2xyi; 2yb8; 5vtb; 3cfv; 3cfs; 7m3x; 3gfc; 6s29; 6s1r; 5wjc; 6s1l; 4xyh; 4xyi; 8i03; 8i02; 4psw; 7xay; 4psx
					zinc finger protein 827	polypeptide(L)		5.48132	1	5xxq	1	51	6zrd; 7y5k; 7r1d; 7y5o; 7y5l; 4pc0; 4pby; 8iqf; 7m40; 7y5u; 7y5v; 8iqg; 7n40; 5wai; 6wkr; 5wak; 6g16; 7ktp; 7kso; 6c23; 6c24; 4pbz; 7aoa; 5y1u; 6nq3; 6zrc; 5fxy; 5xwr; 5xxq; 6bw4; 6bw3; 2xu7; 7ksr; 4r7a; 2yba; 3c9c; 3c99; 2xyi; 2yb8; 5vtb; 3cfv; 3cfs; 6s29; 6s1r; 5wjc; 4xyi; 8i03; 8i02; 4psw; 7xay; 4psx	55	6zrd; 7y5k; 7r1d; 7y5o; 7y5l; 4pc0; 4pby; 8iqf; 7m40; 7y5u; 7y5v; 8iqg; 7n40; 5wai; 6wkr; 5wak; 6g16; 7ktp; 7kso; 6c23; 6c24; 4pbz; 7aoa; 5y1u; 6nq3; 6zrc; 5fxy; 5xwr; 5xxq; 6bw4; 6bw3; 2xu7; 7ksr; 4r7a; 2yba; 3c9c; 3c99; 2xyi; 2yb8; 5vtb; 3cfv; 3cfs; 7m3x; 3gfc; 6s29; 6s1r; 5wjc; 6s1l; 4xyh; 4xyi; 8i03; 8i02; 4psw; 7xay; 4psx
					zinc finger protein zfpm1	polypeptide(L)		5.26948	1	2xu7	1	51	6zrd; 7y5k; 7r1d; 7y5o; 7y5l; 4pc0; 4pby; 8iqf; 7m40; 7y5u; 7y5v; 8iqg; 7n40; 5wai; 6wkr; 5wak; 6g16; 7ktp; 7kso; 6c23; 6c24; 4pbz; 7aoa; 5y1u; 6nq3; 6zrc; 5fxy; 5xwr; 5xxq; 6bw4; 6bw3; 2xu7; 7ksr; 4r7a; 2yba; 3c9c; 3c99; 2xyi; 2yb8; 5vtb; 3cfv; 3cfs; 6s29; 6s1r; 5wjc; 4xyi; 8i03; 8i02; 4psw; 7xay; 4psx	55	6zrd; 7y5k; 7r1d; 7y5o; 7y5l; 4pc0; 4pby; 8iqf; 7m40; 7y5u; 7y5v; 8iqg; 7n40; 5wai; 6wkr; 5wak; 6g16; 7ktp; 7kso; 6c23; 6c24; 4pbz; 7aoa; 5y1u; 6nq3; 6zrc; 5fxy; 5xwr; 5xxq; 6bw4; 6bw3; 2xu7; 7ksr; 4r7a; 2yba; 3c9c; 3c99; 2xyi; 2yb8; 5vtb; 3cfv; 3cfs; 7m3x; 3gfc; 6s29; 6s1r; 5wjc; 6s1l; 4xyh; 4xyi; 8i03; 8i02; 4psw; 7xay; 4psx
					transcriptional regulatory protein rxt3	polypeptide(L)		4.53945	1	8i03	0	51	6zrd; 7y5k; 7r1d; 7y5o; 7y5l; 4pc0; 4pby; 8iqf; 7m40; 7y5u; 7y5v; 8iqg; 7n40; 5wai; 6wkr; 5wak; 6g16; 7ktp; 7kso; 6c23; 6c24; 4pbz; 7aoa; 5y1u; 6nq3; 6zrc; 5fxy; 5xwr; 5xxq; 6bw4; 6bw3; 2xu7; 7ksr; 4r7a; 2yba; 3c9c; 3c99; 2xyi; 2yb8; 5vtb; 3cfv; 3cfs; 6s29; 6s1r; 5wjc; 4xyi; 8i03; 8i02; 4psw; 7xay; 4psx	55	6zrd; 7y5k; 7r1d; 7y5o; 7y5l; 4pc0; 4pby; 8iqf; 7m40; 7y5u; 7y5v; 8iqg; 7n40; 5wai; 6wkr; 5wak; 6g16; 7ktp; 7kso; 6c23; 6c24; 4pbz; 7aoa; 5y1u; 6nq3; 6zrc; 5fxy; 5xwr; 5xxq; 6bw4; 6bw3; 2xu7; 7ksr; 4r7a; 2yba; 3c9c; 3c99; 2xyi; 2yb8; 5vtb; 3cfv; 3cfs; 7m3x; 3gfc; 6s29; 6s1r; 5wjc; 6s1l; 4xyh; 4xyi; 8i03; 8i02; 4psw; 7xay; 4psx
					b-cell lymphoma/leukemia 11a	polypeptide(L)		5.55493	1	5vtb	1	51	6zrd; 7y5k; 7r1d; 7y5o; 7y5l; 4pc0; 4pby; 8iqf; 7m40; 7y5u; 7y5v; 8iqg; 7n40; 5wai; 6wkr; 5wak; 6g16; 7ktp; 7kso; 6c23; 6c24; 4pbz; 7aoa; 5y1u; 6nq3; 6zrc; 5fxy; 5xwr; 5xxq; 6bw4; 6bw3; 2xu7; 7ksr; 4r7a; 2yba; 3c9c; 3c99; 2xyi; 2yb8; 5vtb; 3cfv; 3cfs; 6s29; 6s1r; 5wjc; 4xyi; 8i03; 8i02; 4psw; 7xay; 4psx	55	6zrd; 7y5k; 7r1d; 7y5o; 7y5l; 4pc0; 4pby; 8iqf; 7m40; 7y5u; 7y5v; 8iqg; 7n40; 5wai; 6wkr; 5wak; 6g16; 7ktp; 7kso; 6c23; 6c24; 4pbz; 7aoa; 5y1u; 6nq3; 6zrc; 5fxy; 5xwr; 5xxq; 6bw4; 6bw3; 2xu7; 7ksr; 4r7a; 2yba; 3c9c; 3c99; 2xyi; 2yb8; 5vtb; 3cfv; 3cfs; 7m3x; 3gfc; 6s29; 6s1r; 5wjc; 6s1l; 4xyh; 4xyi; 8i03; 8i02; 4psw; 7xay; 4psx
					n~3~-{4-[3-(dimethylamino)pyrrolidin-1-yl]-6,7-dimethoxyquinazolin-2-yl}-n~1~,n~1~-dimethylpropane-1,3-diamine	bound	YQJ	3.25192	1	7m40	1	51	6zrd; 7y5k; 7r1d; 7y5o; 7y5l; 4pc0; 4pby; 8iqf; 7m40; 7y5u; 7y5v; 8iqg; 7n40; 5wai; 6wkr; 5wak; 6g16; 7ktp; 7kso; 6c23; 6c24; 4pbz; 7aoa; 5y1u; 6nq3; 6zrc; 5fxy; 5xwr; 5xxq; 6bw4; 6bw3; 2xu7; 7ksr; 4r7a; 2yba; 3c9c; 3c99; 2xyi; 2yb8; 5vtb; 3cfv; 3cfs; 6s29; 6s1r; 5wjc; 4xyi; 8i03; 8i02; 4psw; 7xay; 4psx	55	6zrd; 7y5k; 7r1d; 7y5o; 7y5l; 4pc0; 4pby; 8iqf; 7m40; 7y5u; 7y5v; 8iqg; 7n40; 5wai; 6wkr; 5wak; 6g16; 7ktp; 7kso; 6c23; 6c24; 4pbz; 7aoa; 5y1u; 6nq3; 6zrc; 5fxy; 5xwr; 5xxq; 6bw4; 6bw3; 2xu7; 7ksr; 4r7a; 2yba; 3c9c; 3c99; 2xyi; 2yb8; 5vtb; 3cfv; 3cfs; 7m3x; 3gfc; 6s29; 6s1r; 5wjc; 6s1l; 4xyh; 4xyi; 8i03; 8i02; 4psw; 7xay; 4psx
					phd finger protein 6	polypeptide(L)		5.40704	1	4r7a	1	51	6zrd; 7y5k; 7r1d; 7y5o; 7y5l; 4pc0; 4pby; 8iqf; 7m40; 7y5u; 7y5v; 8iqg; 7n40; 5wai; 6wkr; 5wak; 6g16; 7ktp; 7kso; 6c23; 6c24; 4pbz; 7aoa; 5y1u; 6nq3; 6zrc; 5fxy; 5xwr; 5xxq; 6bw4; 6bw3; 2xu7; 7ksr; 4r7a; 2yba; 3c9c; 3c99; 2xyi; 2yb8; 5vtb; 3cfv; 3cfs; 6s29; 6s1r; 5wjc; 4xyi; 8i03; 8i02; 4psw; 7xay; 4psx	55	6zrd; 7y5k; 7r1d; 7y5o; 7y5l; 4pc0; 4pby; 8iqf; 7m40; 7y5u; 7y5v; 8iqg; 7n40; 5wai; 6wkr; 5wak; 6g16; 7ktp; 7kso; 6c23; 6c24; 4pbz; 7aoa; 5y1u; 6nq3; 6zrc; 5fxy; 5xwr; 5xxq; 6bw4; 6bw3; 2xu7; 7ksr; 4r7a; 2yba; 3c9c; 3c99; 2xyi; 2yb8; 5vtb; 3cfv; 3cfs; 7m3x; 3gfc; 6s29; 6s1r; 5wjc; 6s1l; 4xyh; 4xyi; 8i03; 8i02; 4psw; 7xay; 4psx
					polycomb protein suz12	polypeptide(L)		5.55953	1	5wak	1	51	6zrd; 7y5k; 7r1d; 7y5o; 7y5l; 4pc0; 4pby; 8iqf; 7m40; 7y5u; 7y5v; 8iqg; 7n40; 5wai; 6wkr; 5wak; 6g16; 7ktp; 7kso; 6c23; 6c24; 4pbz; 7aoa; 5y1u; 6nq3; 6zrc; 5fxy; 5xwr; 5xxq; 6bw4; 6bw3; 2xu7; 7ksr; 4r7a; 2yba; 3c9c; 3c99; 2xyi; 2yb8; 5vtb; 3cfv; 3cfs; 6s29; 6s1r; 5wjc; 4xyi; 8i03; 8i02; 4psw; 7xay; 4psx	55	6zrd; 7y5k; 7r1d; 7y5o; 7y5l; 4pc0; 4pby; 8iqf; 7m40; 7y5u; 7y5v; 8iqg; 7n40; 5wai; 6wkr; 5wak; 6g16; 7ktp; 7kso; 6c23; 6c24; 4pbz; 7aoa; 5y1u; 6nq3; 6zrc; 5fxy; 5xwr; 5xxq; 6bw4; 6bw3; 2xu7; 7ksr; 4r7a; 2yba; 3c9c; 3c99; 2xyi; 2yb8; 5vtb; 3cfv; 3cfs; 7m3x; 3gfc; 6s29; 6s1r; 5wjc; 6s1l; 4xyh; 4xyi; 8i03; 8i02; 4psw; 7xay; 4psx
					isopropyl alcohol	bound	IPA	4.72159	1	4pby	1	51	6zrd; 7y5k; 7r1d; 7y5o; 7y5l; 4pc0; 4pby; 8iqf; 7m40; 7y5u; 7y5v; 8iqg; 7n40; 5wai; 6wkr; 5wak; 6g16; 7ktp; 7kso; 6c23; 6c24; 4pbz; 7aoa; 5y1u; 6nq3; 6zrc; 5fxy; 5xwr; 5xxq; 6bw4; 6bw3; 2xu7; 7ksr; 4r7a; 2yba; 3c9c; 3c99; 2xyi; 2yb8; 5vtb; 3cfv; 3cfs; 6s29; 6s1r; 5wjc; 4xyi; 8i03; 8i02; 4psw; 7xay; 4psx	55	6zrd; 7y5k; 7r1d; 7y5o; 7y5l; 4pc0; 4pby; 8iqf; 7m40; 7y5u; 7y5v; 8iqg; 7n40; 5wai; 6wkr; 5wak; 6g16; 7ktp; 7kso; 6c23; 6c24; 4pbz; 7aoa; 5y1u; 6nq3; 6zrc; 5fxy; 5xwr; 5xxq; 6bw4; 6bw3; 2xu7; 7ksr; 4r7a; 2yba; 3c9c; 3c99; 2xyi; 2yb8; 5vtb; 3cfv; 3cfs; 7m3x; 3gfc; 6s29; 6s1r; 5wjc; 6s1l; 4xyh; 4xyi; 8i03; 8i02; 4psw; 7xay; 4psx
					sulfate ion	bound	SO4	7.57233	1	5y1u	1	51	6zrd; 7y5k; 7r1d; 7y5o; 7y5l; 4pc0; 4pby; 8iqf; 7m40; 7y5u; 7y5v; 8iqg; 7n40; 5wai; 6wkr; 5wak; 6g16; 7ktp; 7kso; 6c23; 6c24; 4pbz; 7aoa; 5y1u; 6nq3; 6zrc; 5fxy; 5xwr; 5xxq; 6bw4; 6bw3; 2xu7; 7ksr; 4r7a; 2yba; 3c9c; 3c99; 2xyi; 2yb8; 5vtb; 3cfv; 3cfs; 6s29; 6s1r; 5wjc; 4xyi; 8i03; 8i02; 4psw; 7xay; 4psx	55	6zrd; 7y5k; 7r1d; 7y5o; 7y5l; 4pc0; 4pby; 8iqf; 7m40; 7y5u; 7y5v; 8iqg; 7n40; 5wai; 6wkr; 5wak; 6g16; 7ktp; 7kso; 6c23; 6c24; 4pbz; 7aoa; 5y1u; 6nq3; 6zrc; 5fxy; 5xwr; 5xxq; 6bw4; 6bw3; 2xu7; 7ksr; 4r7a; 2yba; 3c9c; 3c99; 2xyi; 2yb8; 5vtb; 3cfv; 3cfs; 7m3x; 3gfc; 6s29; 6s1r; 5wjc; 6s1l; 4xyh; 4xyi; 8i03; 8i02; 4psw; 7xay; 4psx
9	WDR5	NP_438172.1	S62N	-6.81					0		0	70	2gnq; 6ujh; 7axs; 7axq; 8q1n; 2h9l; 4gm9; 6ucs; 7axx; 5eap; 6u80; 6pg8; 6u6w; 6u8b; 7bed; 4gmb; 8g3e; 6e1z; 6iam; 2cnx; 2h6k; 6ujj; 6ujl; 7u9y; 8e9f; 4o45; 4ia9; 6d9x; 6das; 2g9a; 6dai; 2h6n; 6dya; 6pg6; 5vfc; 6u8l; 6u8o; 2h6q; 5sxm; 6uhy; 4gm3; 4ql1; 3eg6; 5eal; 5eam; 4erz; 4ery; 7cfq; 7cfp; 4cy2; 6oi3; 6byn; 6u5m; 6u5y; 6e22; 6dak; 4qqe; 4es0; 4y7r; 4esg; 4ewr; 4erq; 6oi2; 2o9k; 6dy7; 8g3c; 2h9…	72	2gnq; 6ujh; 7axs; 7axq; 7axu; 8q1n; 2h9l; 4gm9; 6ucs; 7axx; 5eap; 6u80; 6pg8; 6u6w; 6u8b; 7bed; 4gmb; 8g3e; 6e1z; 6iam; 2h68; 2cnx; 2h6k; 6ujj; 6ujl; 7u9y; 8e9f; 4o45; 4ia9; 6d9x; 6das; 2g9a; 6dai; 2h6n; 6dya; 6pg6; 5vfc; 6u8l; 6u8o; 2h6q; 5sxm; 6uhy; 4gm3; 4ql1; 3eg6; 5eal; 5eam; 4erz; 4ery; 7cfq; 7cfp; 4cy2; 6oi3; 6byn; 6u5m; 6u5y; 6e22; 6dak; 4qqe; 4es0; 4y7r; 4esg; 4ewr; 4erq; 6oi2; 2o9k; 6dy…
			T208M	-5.134	benzamidine	bound	BEN	6.76625	2	7u9y; 8e9f	2	70	2gnq; 6ujh; 7axs; 7axq; 8q1n; 2h9l; 4gm9; 6ucs; 7axx; 5eap; 6u80; 6pg8; 6u6w; 6u8b; 7bed; 4gmb; 8g3e; 6e1z; 6iam; 2cnx; 2h6k; 6ujj; 6ujl; 7u9y; 8e9f; 4o45; 4ia9; 6d9x; 6das; 2g9a; 6dai; 2h6n; 6dya; 6pg6; 5vfc; 6u8l; 6u8o; 2h6q; 5sxm; 6uhy; 4gm3; 4ql1; 3eg6; 5eal; 5eam; 4erz; 4ery; 7cfq; 7cfp; 4cy2; 6oi3; 6byn; 6u5m; 6u5y; 6e22; 6dak; 4qqe; 4es0; 4y7r; 4esg; 4ewr; 4erq; 6oi2; 2o9k; 6dy7; 8g3c; 2h9…	72	2gnq; 6ujh; 7axs; 7axq; 7axu; 8q1n; 2h9l; 4gm9; 6ucs; 7axx; 5eap; 6u80; 6pg8; 6u6w; 6u8b; 7bed; 4gmb; 8g3e; 6e1z; 6iam; 2h68; 2cnx; 2h6k; 6ujj; 6ujl; 7u9y; 8e9f; 4o45; 4ia9; 6d9x; 6das; 2g9a; 6dai; 2h6n; 6dya; 6pg6; 5vfc; 6u8l; 6u8o; 2h6q; 5sxm; 6uhy; 4gm3; 4ql1; 3eg6; 5eal; 5eam; 4erz; 4ery; 7cfq; 7cfp; 4cy2; 6oi3; 6byn; 6u5m; 6u5y; 6e22; 6dak; 4qqe; 4es0; 4y7r; 4esg; 4ewr; 4erq; 6oi2; 2o9k; 6dy…
			R196C	-5.056	benzamidine	bound	BEN	6.83502	2	7u9y; 8e9f	2	70	2gnq; 6ujh; 7axs; 7axq; 8q1n; 2h9l; 4gm9; 6ucs; 7axx; 5eap; 6u80; 6pg8; 6u6w; 6u8b; 7bed; 4gmb; 8g3e; 6e1z; 6iam; 2cnx; 2h6k; 6ujj; 6ujl; 7u9y; 8e9f; 4o45; 4ia9; 6d9x; 6das; 2g9a; 6dai; 2h6n; 6dya; 6pg6; 5vfc; 6u8l; 6u8o; 2h6q; 5sxm; 6uhy; 4gm3; 4ql1; 3eg6; 5eal; 5eam; 4erz; 4ery; 7cfq; 7cfp; 4cy2; 6oi3; 6byn; 6u5m; 6u5y; 6e22; 6dak; 4qqe; 4es0; 4y7r; 4esg; 4ewr; 4erq; 6oi2; 2o9k; 6dy7; 8g3c; 2h9…	72	2gnq; 6ujh; 7axs; 7axq; 7axu; 8q1n; 2h9l; 4gm9; 6ucs; 7axx; 5eap; 6u80; 6pg8; 6u6w; 6u8b; 7bed; 4gmb; 8g3e; 6e1z; 6iam; 2h68; 2cnx; 2h6k; 6ujj; 6ujl; 7u9y; 8e9f; 4o45; 4ia9; 6d9x; 6das; 2g9a; 6dai; 2h6n; 6dya; 6pg6; 5vfc; 6u8l; 6u8o; 2h6q; 5sxm; 6uhy; 4gm3; 4ql1; 3eg6; 5eal; 5eam; 4erz; 4ery; 7cfq; 7cfp; 4cy2; 6oi3; 6byn; 6u5m; 6u5y; 6e22; 6dak; 4qqe; 4es0; 4y7r; 4esg; 4ewr; 4erq; 6oi2; 2o9k; 6dy…
					potassium ion	bound	K	6.49548	1	6iam	1	70	2gnq; 6ujh; 7axs; 7axq; 8q1n; 2h9l; 4gm9; 6ucs; 7axx; 5eap; 6u80; 6pg8; 6u6w; 6u8b; 7bed; 4gmb; 8g3e; 6e1z; 6iam; 2cnx; 2h6k; 6ujj; 6ujl; 7u9y; 8e9f; 4o45; 4ia9; 6d9x; 6das; 2g9a; 6dai; 2h6n; 6dya; 6pg6; 5vfc; 6u8l; 6u8o; 2h6q; 5sxm; 6uhy; 4gm3; 4ql1; 3eg6; 5eal; 5eam; 4erz; 4ery; 7cfq; 7cfp; 4cy2; 6oi3; 6byn; 6u5m; 6u5y; 6e22; 6dak; 4qqe; 4es0; 4y7r; 4esg; 4ewr; 4erq; 6oi2; 2o9k; 6dy7; 8g3c; 2h9…	72	2gnq; 6ujh; 7axs; 7axq; 7axu; 8q1n; 2h9l; 4gm9; 6ucs; 7axx; 5eap; 6u80; 6pg8; 6u6w; 6u8b; 7bed; 4gmb; 8g3e; 6e1z; 6iam; 2h68; 2cnx; 2h6k; 6ujj; 6ujl; 7u9y; 8e9f; 4o45; 4ia9; 6d9x; 6das; 2g9a; 6dai; 2h6n; 6dya; 6pg6; 5vfc; 6u8l; 6u8o; 2h6q; 5sxm; 6uhy; 4gm3; 4ql1; 3eg6; 5eal; 5eam; 4erz; 4ery; 7cfq; 7cfp; 4cy2; 6oi3; 6byn; 6u5m; 6u5y; 6e22; 6dak; 4qqe; 4es0; 4y7r; 4esg; 4ewr; 4erq; 6oi2; 2o9k; 6dy…
4	UBE2D3	NP_871621.1	S105Y	-6.735	ubiquitin	polypeptide(L)		2.15216	19	6t7f; 5d0m; 6w9d; 7r71; 5zbu; 6sqs; 6hpr; 4auq; 5mnj; 7ahz; 7ai0; 7ai1; 5vzw; 6ttu; 6sqo; 4v3k; 4v3l; 6sqr; 3zni	20	52	3l1z; 6cp0; 7lyb; 3ugb; 2fuh; 3rpg; 5ifr; 4bvu; 4r8p; 4s3o; 6t7f; 7jzv; 5d0k; 1ur6; 5d0m; 4ddi; 4wz3; 4ldt; 4ddg; 2esp; 3a33; 6w7z; 6w9d; 7r71; 8gbq; 8gcb; 3eb6; 6m2c; 5ulh; 5zbu; 5ulk; 5ulf; 6sqs; 6hpr; 4auq; 5mnj; 3jw0; 7ahz; 7ai0; 3jvz; 7ai1; 5vzw; 5edv; 4a49; 4a4b; 6ttu; 5d1l; 6sqo; 4v3k; 4v3l; 6sqr; 3zni	61	1x23; 3l1z; 6cp0; 5egg; 7lyb; 3ugb; 2fuh; 3rpg; 5ifr; 4bvu; 4r8p; 4s3o; 6t7f; 7jzv; 5d0k; 1w4u; 1ur6; 5d0m; 4ddi; 4wz3; 4ldt; 4ddg; 7bol; 2esk; 2eso; 2esp; 2esq; 3a33; 3l1y; 3tgd; 6w7z; 6w9d; 7r71; 8gbq; 8gcb; 3eb6; 6m2c; 5ulh; 5zbu; 5ulk; 5ulf; 6sqs; 6hpr; 4auq; 5mnj; 3jw0; 7ahz; 7ai0; 3jvz; 7ai1; 5vzw; 5edv; 4a49; 4a4b; 6ttu; 5d1l; 6sqo; 4v3k; 4v3l; 6sqr; 3zni
					e3 ubiquitin-protein ligase mdm2	polypeptide(L)		6.59439	3	7ahz; 7ai0; 7ai1	3	52	3l1z; 6cp0; 7lyb; 3ugb; 2fuh; 3rpg; 5ifr; 4bvu; 4r8p; 4s3o; 6t7f; 7jzv; 5d0k; 1ur6; 5d0m; 4ddi; 4wz3; 4ldt; 4ddg; 2esp; 3a33; 6w7z; 6w9d; 7r71; 8gbq; 8gcb; 3eb6; 6m2c; 5ulh; 5zbu; 5ulk; 5ulf; 6sqs; 6hpr; 4auq; 5mnj; 3jw0; 7ahz; 7ai0; 3jvz; 7ai1; 5vzw; 5edv; 4a49; 4a4b; 6ttu; 5d1l; 6sqo; 4v3k; 4v3l; 6sqr; 3zni	61	1x23; 3l1z; 6cp0; 5egg; 7lyb; 3ugb; 2fuh; 3rpg; 5ifr; 4bvu; 4r8p; 4s3o; 6t7f; 7jzv; 5d0k; 1w4u; 1ur6; 5d0m; 4ddi; 4wz3; 4ldt; 4ddg; 7bol; 2esk; 2eso; 2esp; 2esq; 3a33; 3l1y; 3tgd; 6w7z; 6w9d; 7r71; 8gbq; 8gcb; 3eb6; 6m2c; 5ulh; 5zbu; 5ulk; 5ulf; 6sqs; 6hpr; 4auq; 5mnj; 3jw0; 7ahz; 7ai0; 3jvz; 7ai1; 5vzw; 5edv; 4a49; 4a4b; 6ttu; 5d1l; 6sqo; 4v3k; 4v3l; 6sqr; 3zni
					iodide ion	bound	IOD	6.16568	1	6w9d	1	52	3l1z; 6cp0; 7lyb; 3ugb; 2fuh; 3rpg; 5ifr; 4bvu; 4r8p; 4s3o; 6t7f; 7jzv; 5d0k; 1ur6; 5d0m; 4ddi; 4wz3; 4ldt; 4ddg; 2esp; 3a33; 6w7z; 6w9d; 7r71; 8gbq; 8gcb; 3eb6; 6m2c; 5ulh; 5zbu; 5ulk; 5ulf; 6sqs; 6hpr; 4auq; 5mnj; 3jw0; 7ahz; 7ai0; 3jvz; 7ai1; 5vzw; 5edv; 4a49; 4a4b; 6ttu; 5d1l; 6sqo; 4v3k; 4v3l; 6sqr; 3zni	61	1x23; 3l1z; 6cp0; 5egg; 7lyb; 3ugb; 2fuh; 3rpg; 5ifr; 4bvu; 4r8p; 4s3o; 6t7f; 7jzv; 5d0k; 1w4u; 1ur6; 5d0m; 4ddi; 4wz3; 4ldt; 4ddg; 7bol; 2esk; 2eso; 2esp; 2esq; 3a33; 3l1y; 3tgd; 6w7z; 6w9d; 7r71; 8gbq; 8gcb; 3eb6; 6m2c; 5ulh; 5zbu; 5ulk; 5ulf; 6sqs; 6hpr; 4auq; 5mnj; 3jw0; 7ahz; 7ai0; 3jvz; 7ai1; 5vzw; 5edv; 4a49; 4a4b; 6ttu; 5d1l; 6sqo; 4v3k; 4v3l; 6sqr; 3zni
					(4s)-2-methyl-2,4-pentanediol	bound	MPD	2.97227	1	2esp	1	52	3l1z; 6cp0; 7lyb; 3ugb; 2fuh; 3rpg; 5ifr; 4bvu; 4r8p; 4s3o; 6t7f; 7jzv; 5d0k; 1ur6; 5d0m; 4ddi; 4wz3; 4ldt; 4ddg; 2esp; 3a33; 6w7z; 6w9d; 7r71; 8gbq; 8gcb; 3eb6; 6m2c; 5ulh; 5zbu; 5ulk; 5ulf; 6sqs; 6hpr; 4auq; 5mnj; 3jw0; 7ahz; 7ai0; 3jvz; 7ai1; 5vzw; 5edv; 4a49; 4a4b; 6ttu; 5d1l; 6sqo; 4v3k; 4v3l; 6sqr; 3zni	61	1x23; 3l1z; 6cp0; 5egg; 7lyb; 3ugb; 2fuh; 3rpg; 5ifr; 4bvu; 4r8p; 4s3o; 6t7f; 7jzv; 5d0k; 1w4u; 1ur6; 5d0m; 4ddi; 4wz3; 4ldt; 4ddg; 7bol; 2esk; 2eso; 2esp; 2esq; 3a33; 3l1y; 3tgd; 6w7z; 6w9d; 7r71; 8gbq; 8gcb; 3eb6; 6m2c; 5ulh; 5zbu; 5ulk; 5ulf; 6sqs; 6hpr; 4auq; 5mnj; 3jw0; 7ahz; 7ai0; 3jvz; 7ai1; 5vzw; 5edv; 4a49; 4a4b; 6ttu; 5d1l; 6sqo; 4v3k; 4v3l; 6sqr; 3zni
					e3 ubiquitin-protein ligase rnf31	polypeptide(L)		7.16571	1	5edv	1	52	3l1z; 6cp0; 7lyb; 3ugb; 2fuh; 3rpg; 5ifr; 4bvu; 4r8p; 4s3o; 6t7f; 7jzv; 5d0k; 1ur6; 5d0m; 4ddi; 4wz3; 4ldt; 4ddg; 2esp; 3a33; 6w7z; 6w9d; 7r71; 8gbq; 8gcb; 3eb6; 6m2c; 5ulh; 5zbu; 5ulk; 5ulf; 6sqs; 6hpr; 4auq; 5mnj; 3jw0; 7ahz; 7ai0; 3jvz; 7ai1; 5vzw; 5edv; 4a49; 4a4b; 6ttu; 5d1l; 6sqo; 4v3k; 4v3l; 6sqr; 3zni	61	1x23; 3l1z; 6cp0; 5egg; 7lyb; 3ugb; 2fuh; 3rpg; 5ifr; 4bvu; 4r8p; 4s3o; 6t7f; 7jzv; 5d0k; 1w4u; 1ur6; 5d0m; 4ddi; 4wz3; 4ldt; 4ddg; 7bol; 2esk; 2eso; 2esp; 2esq; 3a33; 3l1y; 3tgd; 6w7z; 6w9d; 7r71; 8gbq; 8gcb; 3eb6; 6m2c; 5ulh; 5zbu; 5ulk; 5ulf; 6sqs; 6hpr; 4auq; 5mnj; 3jw0; 7ahz; 7ai0; 3jvz; 7ai1; 5vzw; 5edv; 4a49; 4a4b; 6ttu; 5d1l; 6sqo; 4v3k; 4v3l; 6sqr; 3zni
					phosphate ion	bound	PO4	4.39943	1	5d0m	1	52	3l1z; 6cp0; 7lyb; 3ugb; 2fuh; 3rpg; 5ifr; 4bvu; 4r8p; 4s3o; 6t7f; 7jzv; 5d0k; 1ur6; 5d0m; 4ddi; 4wz3; 4ldt; 4ddg; 2esp; 3a33; 6w7z; 6w9d; 7r71; 8gbq; 8gcb; 3eb6; 6m2c; 5ulh; 5zbu; 5ulk; 5ulf; 6sqs; 6hpr; 4auq; 5mnj; 3jw0; 7ahz; 7ai0; 3jvz; 7ai1; 5vzw; 5edv; 4a49; 4a4b; 6ttu; 5d1l; 6sqo; 4v3k; 4v3l; 6sqr; 3zni	61	1x23; 3l1z; 6cp0; 5egg; 7lyb; 3ugb; 2fuh; 3rpg; 5ifr; 4bvu; 4r8p; 4s3o; 6t7f; 7jzv; 5d0k; 1w4u; 1ur6; 5d0m; 4ddi; 4wz3; 4ldt; 4ddg; 7bol; 2esk; 2eso; 2esp; 2esq; 3a33; 3l1y; 3tgd; 6w7z; 6w9d; 7r71; 8gbq; 8gcb; 3eb6; 6m2c; 5ulh; 5zbu; 5ulk; 5ulf; 6sqs; 6hpr; 4auq; 5mnj; 3jw0; 7ahz; 7ai0; 3jvz; 7ai1; 5vzw; 5edv; 4a49; 4a4b; 6ttu; 5d1l; 6sqo; 4v3k; 4v3l; 6sqr; 3zni
3	EIF4A2	NP_001958.2	Q60K	-6.643	protein mago nashi homolog	polypeptide(L)		6.45855	11	2j0q; 2hyi; 7a5p; 8c6j; 2xb2; 2j0s; 3ex7; 7w5b; 7w5a; 7w59; 7znj	11	56	7pq0; 6zmw; 8huj; 5zc9; 6xki; 7ppz; 3eiq; 2zu6; 2j0q; 5yzg; 2hyi; 7a5p; 8c6j; 2xb2; 2j0s; 5xjc; 3ex7; 4c9b; 7w5b; 7w5a; 7w59; 6icz; 5mqf; 6qdv; 7znj; 2j0u; 2vsx; 2vso; 5zbz; 7ddx; 4brw; 4bru; 1qde; 3g0h; 6b4i; 6b4j; 3fht; 3ews; 6b4k; 4ct4; 3pew; 3pey; 5elx; 3rrn; 5anr; 3rrm; 8enk; 1xti; 1xtk; 1xtj; 5sup; 7znk; 5suq; 7v2y; 7luv; 1hv8	63	7pq0; 6zmw; 8huj; 5zc9; 6xki; 7ppz; 3eiq; 2zu6; 2j0q; 5yzg; 2hyi; 7a5p; 8c6j; 2xb2; 2j0s; 5xjc; 3ex7; 4c9b; 2hxy; 7w5b; 7w5a; 7w59; 6icz; 5mqf; 6qdv; 7znj; 2j0u; 1fuu; 2vsx; 2vso; 5zbz; 2g9n; 7ddx; 3bor; 1qva; 1s2m; 4brw; 4bru; 1qde; 3g0h; 6b4i; 6b4j; 3fht; 3ews; 6b4k; 4ct5; 4ct4; 3pew; 3pey; 5elx; 3rrn; 5anr; 3rrm; 8enk; 1xti; 1xtk; 1xtj; 5sup; 7znk; 5suq; 7v2y; 7luv; 1hv8
					phosphoaminophosphonic acid-adenylate ester	bound	ANP	1.79285	11	5zc9; 6xki; 2j0q; 2hyi; 2xb2; 2j0s; 7znj; 3g0h; 6b4j; 3fht; 6b4k	11	56	7pq0; 6zmw; 8huj; 5zc9; 6xki; 7ppz; 3eiq; 2zu6; 2j0q; 5yzg; 2hyi; 7a5p; 8c6j; 2xb2; 2j0s; 5xjc; 3ex7; 4c9b; 7w5b; 7w5a; 7w59; 6icz; 5mqf; 6qdv; 7znj; 2j0u; 2vsx; 2vso; 5zbz; 7ddx; 4brw; 4bru; 1qde; 3g0h; 6b4i; 6b4j; 3fht; 3ews; 6b4k; 4ct4; 3pew; 3pey; 5elx; 3rrn; 5anr; 3rrm; 8enk; 1xti; 1xtk; 1xtj; 5sup; 7znk; 5suq; 7v2y; 7luv; 1hv8	63	7pq0; 6zmw; 8huj; 5zc9; 6xki; 7ppz; 3eiq; 2zu6; 2j0q; 5yzg; 2hyi; 7a5p; 8c6j; 2xb2; 2j0s; 5xjc; 3ex7; 4c9b; 2hxy; 7w5b; 7w5a; 7w59; 6icz; 5mqf; 6qdv; 7znj; 2j0u; 1fuu; 2vsx; 2vso; 5zbz; 2g9n; 7ddx; 3bor; 1qva; 1s2m; 4brw; 4bru; 1qde; 3g0h; 6b4i; 6b4j; 3fht; 3ews; 6b4k; 4ct5; 4ct4; 3pew; 3pey; 5elx; 3rrn; 5anr; 3rrm; 8enk; 1xti; 1xtk; 1xtj; 5sup; 7znk; 5suq; 7v2y; 7luv; 1hv8
					adenosine-5'-diphosphate	bound	ADP	1.9051	10	3ex7; 6b4i; 3ews; 3pew; 3pey; 3rrn; 3rrm; 8enk; 1xtj; 5sup	10	56	7pq0; 6zmw; 8huj; 5zc9; 6xki; 7ppz; 3eiq; 2zu6; 2j0q; 5yzg; 2hyi; 7a5p; 8c6j; 2xb2; 2j0s; 5xjc; 3ex7; 4c9b; 7w5b; 7w5a; 7w59; 6icz; 5mqf; 6qdv; 7znj; 2j0u; 2vsx; 2vso; 5zbz; 7ddx; 4brw; 4bru; 1qde; 3g0h; 6b4i; 6b4j; 3fht; 3ews; 6b4k; 4ct4; 3pew; 3pey; 5elx; 3rrn; 5anr; 3rrm; 8enk; 1xti; 1xtk; 1xtj; 5sup; 7znk; 5suq; 7v2y; 7luv; 1hv8	63	7pq0; 6zmw; 8huj; 5zc9; 6xki; 7ppz; 3eiq; 2zu6; 2j0q; 5yzg; 2hyi; 7a5p; 8c6j; 2xb2; 2j0s; 5xjc; 3ex7; 4c9b; 2hxy; 7w5b; 7w5a; 7w59; 6icz; 5mqf; 6qdv; 7znj; 2j0u; 1fuu; 2vsx; 2vso; 5zbz; 2g9n; 7ddx; 3bor; 1qva; 1s2m; 4brw; 4bru; 1qde; 3g0h; 6b4i; 6b4j; 3fht; 3ews; 6b4k; 4ct5; 4ct4; 3pew; 3pey; 5elx; 3rrn; 5anr; 3rrm; 8enk; 1xti; 1xtk; 1xtj; 5sup; 7znk; 5suq; 7v2y; 7luv; 1hv8
					protein mago nashi homolog 2	polypeptide(L)		6.49139	4	5yzg; 5xjc; 6icz; 6qdv	4	56	7pq0; 6zmw; 8huj; 5zc9; 6xki; 7ppz; 3eiq; 2zu6; 2j0q; 5yzg; 2hyi; 7a5p; 8c6j; 2xb2; 2j0s; 5xjc; 3ex7; 4c9b; 7w5b; 7w5a; 7w59; 6icz; 5mqf; 6qdv; 7znj; 2j0u; 2vsx; 2vso; 5zbz; 7ddx; 4brw; 4bru; 1qde; 3g0h; 6b4i; 6b4j; 3fht; 3ews; 6b4k; 4ct4; 3pew; 3pey; 5elx; 3rrn; 5anr; 3rrm; 8enk; 1xti; 1xtk; 1xtj; 5sup; 7znk; 5suq; 7v2y; 7luv; 1hv8	63	7pq0; 6zmw; 8huj; 5zc9; 6xki; 7ppz; 3eiq; 2zu6; 2j0q; 5yzg; 2hyi; 7a5p; 8c6j; 2xb2; 2j0s; 5xjc; 3ex7; 4c9b; 2hxy; 7w5b; 7w5a; 7w59; 6icz; 5mqf; 6qdv; 7znj; 2j0u; 1fuu; 2vsx; 2vso; 5zbz; 2g9n; 7ddx; 3bor; 1qva; 1s2m; 4brw; 4bru; 1qde; 3g0h; 6b4i; 6b4j; 3fht; 3ews; 6b4k; 4ct5; 4ct4; 3pew; 3pey; 5elx; 3rrn; 5anr; 3rrm; 8enk; 1xti; 1xtk; 1xtj; 5sup; 7znk; 5suq; 7v2y; 7luv; 1hv8
					adenosine-5'-triphosphate	bound	ATP	2.984	4	5yzg; 8c6j; 5xjc; 6qdv	4	56	7pq0; 6zmw; 8huj; 5zc9; 6xki; 7ppz; 3eiq; 2zu6; 2j0q; 5yzg; 2hyi; 7a5p; 8c6j; 2xb2; 2j0s; 5xjc; 3ex7; 4c9b; 7w5b; 7w5a; 7w59; 6icz; 5mqf; 6qdv; 7znj; 2j0u; 2vsx; 2vso; 5zbz; 7ddx; 4brw; 4bru; 1qde; 3g0h; 6b4i; 6b4j; 3fht; 3ews; 6b4k; 4ct4; 3pew; 3pey; 5elx; 3rrn; 5anr; 3rrm; 8enk; 1xti; 1xtk; 1xtj; 5sup; 7znk; 5suq; 7v2y; 7luv; 1hv8	63	7pq0; 6zmw; 8huj; 5zc9; 6xki; 7ppz; 3eiq; 2zu6; 2j0q; 5yzg; 2hyi; 7a5p; 8c6j; 2xb2; 2j0s; 5xjc; 3ex7; 4c9b; 2hxy; 7w5b; 7w5a; 7w59; 6icz; 5mqf; 6qdv; 7znj; 2j0u; 1fuu; 2vsx; 2vso; 5zbz; 2g9n; 7ddx; 3bor; 1qva; 1s2m; 4brw; 4bru; 1qde; 3g0h; 6b4i; 6b4j; 3fht; 3ews; 6b4k; 4ct5; 4ct4; 3pew; 3pey; 5elx; 3rrn; 5anr; 3rrm; 8enk; 1xti; 1xtk; 1xtj; 5sup; 7znk; 5suq; 7v2y; 7luv; 1hv8
					sulfate ion	bound	SO4	6.38787	3	7ddx; 1qde; 1hv8	3	56	7pq0; 6zmw; 8huj; 5zc9; 6xki; 7ppz; 3eiq; 2zu6; 2j0q; 5yzg; 2hyi; 7a5p; 8c6j; 2xb2; 2j0s; 5xjc; 3ex7; 4c9b; 7w5b; 7w5a; 7w59; 6icz; 5mqf; 6qdv; 7znj; 2j0u; 2vsx; 2vso; 5zbz; 7ddx; 4brw; 4bru; 1qde; 3g0h; 6b4i; 6b4j; 3fht; 3ews; 6b4k; 4ct4; 3pew; 3pey; 5elx; 3rrn; 5anr; 3rrm; 8enk; 1xti; 1xtk; 1xtj; 5sup; 7znk; 5suq; 7v2y; 7luv; 1hv8	63	7pq0; 6zmw; 8huj; 5zc9; 6xki; 7ppz; 3eiq; 2zu6; 2j0q; 5yzg; 2hyi; 7a5p; 8c6j; 2xb2; 2j0s; 5xjc; 3ex7; 4c9b; 2hxy; 7w5b; 7w5a; 7w59; 6icz; 5mqf; 6qdv; 7znj; 2j0u; 1fuu; 2vsx; 2vso; 5zbz; 2g9n; 7ddx; 3bor; 1qva; 1s2m; 4brw; 4bru; 1qde; 3g0h; 6b4i; 6b4j; 3fht; 3ews; 6b4k; 4ct5; 4ct4; 3pew; 3pey; 5elx; 3rrn; 5anr; 3rrm; 8enk; 1xti; 1xtk; 1xtj; 5sup; 7znk; 5suq; 7v2y; 7luv; 1hv8
					adenosine monophosphate	bound	AMP	2.79652	2	2vsx; 2vso	2	56	7pq0; 6zmw; 8huj; 5zc9; 6xki; 7ppz; 3eiq; 2zu6; 2j0q; 5yzg; 2hyi; 7a5p; 8c6j; 2xb2; 2j0s; 5xjc; 3ex7; 4c9b; 7w5b; 7w5a; 7w59; 6icz; 5mqf; 6qdv; 7znj; 2j0u; 2vsx; 2vso; 5zbz; 7ddx; 4brw; 4bru; 1qde; 3g0h; 6b4i; 6b4j; 3fht; 3ews; 6b4k; 4ct4; 3pew; 3pey; 5elx; 3rrn; 5anr; 3rrm; 8enk; 1xti; 1xtk; 1xtj; 5sup; 7znk; 5suq; 7v2y; 7luv; 1hv8	63	7pq0; 6zmw; 8huj; 5zc9; 6xki; 7ppz; 3eiq; 2zu6; 2j0q; 5yzg; 2hyi; 7a5p; 8c6j; 2xb2; 2j0s; 5xjc; 3ex7; 4c9b; 2hxy; 7w5b; 7w5a; 7w59; 6icz; 5mqf; 6qdv; 7znj; 2j0u; 1fuu; 2vsx; 2vso; 5zbz; 2g9n; 7ddx; 3bor; 1qva; 1s2m; 4brw; 4bru; 1qde; 3g0h; 6b4i; 6b4j; 3fht; 3ews; 6b4k; 4ct5; 4ct4; 3pew; 3pey; 5elx; 3rrn; 5anr; 3rrm; 8enk; 1xti; 1xtk; 1xtj; 5sup; 7znk; 5suq; 7v2y; 7luv; 1hv8
					tho complex subunit 2	polypeptide(L)		5.70964	2	7znk; 7v2y	2	56	7pq0; 6zmw; 8huj; 5zc9; 6xki; 7ppz; 3eiq; 2zu6; 2j0q; 5yzg; 2hyi; 7a5p; 8c6j; 2xb2; 2j0s; 5xjc; 3ex7; 4c9b; 7w5b; 7w5a; 7w59; 6icz; 5mqf; 6qdv; 7znj; 2j0u; 2vsx; 2vso; 5zbz; 7ddx; 4brw; 4bru; 1qde; 3g0h; 6b4i; 6b4j; 3fht; 3ews; 6b4k; 4ct4; 3pew; 3pey; 5elx; 3rrn; 5anr; 3rrm; 8enk; 1xti; 1xtk; 1xtj; 5sup; 7znk; 5suq; 7v2y; 7luv; 1hv8	63	7pq0; 6zmw; 8huj; 5zc9; 6xki; 7ppz; 3eiq; 2zu6; 2j0q; 5yzg; 2hyi; 7a5p; 8c6j; 2xb2; 2j0s; 5xjc; 3ex7; 4c9b; 2hxy; 7w5b; 7w5a; 7w59; 6icz; 5mqf; 6qdv; 7znj; 2j0u; 1fuu; 2vsx; 2vso; 5zbz; 2g9n; 7ddx; 3bor; 1qva; 1s2m; 4brw; 4bru; 1qde; 3g0h; 6b4i; 6b4j; 3fht; 3ews; 6b4k; 4ct5; 4ct4; 3pew; 3pey; 5elx; 3rrn; 5anr; 3rrm; 8enk; 1xti; 1xtk; 1xtj; 5sup; 7znk; 5suq; 7v2y; 7luv; 1hv8
					eukaryotic initiation factor 4a-iii	polypeptide(L)		6.86621	1	2j0u	1	56	7pq0; 6zmw; 8huj; 5zc9; 6xki; 7ppz; 3eiq; 2zu6; 2j0q; 5yzg; 2hyi; 7a5p; 8c6j; 2xb2; 2j0s; 5xjc; 3ex7; 4c9b; 7w5b; 7w5a; 7w59; 6icz; 5mqf; 6qdv; 7znj; 2j0u; 2vsx; 2vso; 5zbz; 7ddx; 4brw; 4bru; 1qde; 3g0h; 6b4i; 6b4j; 3fht; 3ews; 6b4k; 4ct4; 3pew; 3pey; 5elx; 3rrn; 5anr; 3rrm; 8enk; 1xti; 1xtk; 1xtj; 5sup; 7znk; 5suq; 7v2y; 7luv; 1hv8	63	7pq0; 6zmw; 8huj; 5zc9; 6xki; 7ppz; 3eiq; 2zu6; 2j0q; 5yzg; 2hyi; 7a5p; 8c6j; 2xb2; 2j0s; 5xjc; 3ex7; 4c9b; 2hxy; 7w5b; 7w5a; 7w59; 6icz; 5mqf; 6qdv; 7znj; 2j0u; 1fuu; 2vsx; 2vso; 5zbz; 2g9n; 7ddx; 3bor; 1qva; 1s2m; 4brw; 4bru; 1qde; 3g0h; 6b4i; 6b4j; 3fht; 3ews; 6b4k; 4ct5; 4ct4; 3pew; 3pey; 5elx; 3rrn; 5anr; 3rrm; 8enk; 1xti; 1xtk; 1xtj; 5sup; 7znk; 5suq; 7v2y; 7luv; 1hv8
					13-methyl[1,3]benzodioxolo[5,6-c][1,3]dioxolo[4,5-i]phenanthridin-13-ium	bound	SAU	4.72087	1	5zbz	1	56	7pq0; 6zmw; 8huj; 5zc9; 6xki; 7ppz; 3eiq; 2zu6; 2j0q; 5yzg; 2hyi; 7a5p; 8c6j; 2xb2; 2j0s; 5xjc; 3ex7; 4c9b; 7w5b; 7w5a; 7w59; 6icz; 5mqf; 6qdv; 7znj; 2j0u; 2vsx; 2vso; 5zbz; 7ddx; 4brw; 4bru; 1qde; 3g0h; 6b4i; 6b4j; 3fht; 3ews; 6b4k; 4ct4; 3pew; 3pey; 5elx; 3rrn; 5anr; 3rrm; 8enk; 1xti; 1xtk; 1xtj; 5sup; 7znk; 5suq; 7v2y; 7luv; 1hv8	63	7pq0; 6zmw; 8huj; 5zc9; 6xki; 7ppz; 3eiq; 2zu6; 2j0q; 5yzg; 2hyi; 7a5p; 8c6j; 2xb2; 2j0s; 5xjc; 3ex7; 4c9b; 2hxy; 7w5b; 7w5a; 7w59; 6icz; 5mqf; 6qdv; 7znj; 2j0u; 1fuu; 2vsx; 2vso; 5zbz; 2g9n; 7ddx; 3bor; 1qva; 1s2m; 4brw; 4bru; 1qde; 3g0h; 6b4i; 6b4j; 3fht; 3ews; 6b4k; 4ct5; 4ct4; 3pew; 3pey; 5elx; 3rrn; 5anr; 3rrm; 8enk; 1xti; 1xtk; 1xtj; 5sup; 7znk; 5suq; 7v2y; 7luv; 1hv8
					[(2~{r},3~{r},4~{r},5~{s})-2-(6-aminopurin-9-yl)-4-oxidanyl-5-[[oxidanyl(phosphonooxy)phosphoryl]oxymethyl]oxolan-3-yl] 2-(methylamino)benzoate	bound	M2A	2.92559	1	5elx	1	56	7pq0; 6zmw; 8huj; 5zc9; 6xki; 7ppz; 3eiq; 2zu6; 2j0q; 5yzg; 2hyi; 7a5p; 8c6j; 2xb2; 2j0s; 5xjc; 3ex7; 4c9b; 7w5b; 7w5a; 7w59; 6icz; 5mqf; 6qdv; 7znj; 2j0u; 2vsx; 2vso; 5zbz; 7ddx; 4brw; 4bru; 1qde; 3g0h; 6b4i; 6b4j; 3fht; 3ews; 6b4k; 4ct4; 3pew; 3pey; 5elx; 3rrn; 5anr; 3rrm; 8enk; 1xti; 1xtk; 1xtj; 5sup; 7znk; 5suq; 7v2y; 7luv; 1hv8	63	7pq0; 6zmw; 8huj; 5zc9; 6xki; 7ppz; 3eiq; 2zu6; 2j0q; 5yzg; 2hyi; 7a5p; 8c6j; 2xb2; 2j0s; 5xjc; 3ex7; 4c9b; 2hxy; 7w5b; 7w5a; 7w59; 6icz; 5mqf; 6qdv; 7znj; 2j0u; 1fuu; 2vsx; 2vso; 5zbz; 2g9n; 7ddx; 3bor; 1qva; 1s2m; 4brw; 4bru; 1qde; 3g0h; 6b4i; 6b4j; 3fht; 3ews; 6b4k; 4ct5; 4ct4; 3pew; 3pey; 5elx; 3rrn; 5anr; 3rrm; 8enk; 1xti; 1xtk; 1xtj; 5sup; 7znk; 5suq; 7v2y; 7luv; 1hv8
					beta-mercaptoethanol	bound	BME	7.68946	1	1xtk	1	56	7pq0; 6zmw; 8huj; 5zc9; 6xki; 7ppz; 3eiq; 2zu6; 2j0q; 5yzg; 2hyi; 7a5p; 8c6j; 2xb2; 2j0s; 5xjc; 3ex7; 4c9b; 7w5b; 7w5a; 7w59; 6icz; 5mqf; 6qdv; 7znj; 2j0u; 2vsx; 2vso; 5zbz; 7ddx; 4brw; 4bru; 1qde; 3g0h; 6b4i; 6b4j; 3fht; 3ews; 6b4k; 4ct4; 3pew; 3pey; 5elx; 3rrn; 5anr; 3rrm; 8enk; 1xti; 1xtk; 1xtj; 5sup; 7znk; 5suq; 7v2y; 7luv; 1hv8	63	7pq0; 6zmw; 8huj; 5zc9; 6xki; 7ppz; 3eiq; 2zu6; 2j0q; 5yzg; 2hyi; 7a5p; 8c6j; 2xb2; 2j0s; 5xjc; 3ex7; 4c9b; 2hxy; 7w5b; 7w5a; 7w59; 6icz; 5mqf; 6qdv; 7znj; 2j0u; 1fuu; 2vsx; 2vso; 5zbz; 2g9n; 7ddx; 3bor; 1qva; 1s2m; 4brw; 4bru; 1qde; 3g0h; 6b4i; 6b4j; 3fht; 3ews; 6b4k; 4ct5; 4ct4; 3pew; 3pey; 5elx; 3rrn; 5anr; 3rrm; 8enk; 1xti; 1xtk; 1xtj; 5sup; 7znk; 5suq; 7v2y; 7luv; 1hv8
					magnesium ion	bound	MG	6.40332	1	8c6j	1	56	7pq0; 6zmw; 8huj; 5zc9; 6xki; 7ppz; 3eiq; 2zu6; 2j0q; 5yzg; 2hyi; 7a5p; 8c6j; 2xb2; 2j0s; 5xjc; 3ex7; 4c9b; 7w5b; 7w5a; 7w59; 6icz; 5mqf; 6qdv; 7znj; 2j0u; 2vsx; 2vso; 5zbz; 7ddx; 4brw; 4bru; 1qde; 3g0h; 6b4i; 6b4j; 3fht; 3ews; 6b4k; 4ct4; 3pew; 3pey; 5elx; 3rrn; 5anr; 3rrm; 8enk; 1xti; 1xtk; 1xtj; 5sup; 7znk; 5suq; 7v2y; 7luv; 1hv8	63	7pq0; 6zmw; 8huj; 5zc9; 6xki; 7ppz; 3eiq; 2zu6; 2j0q; 5yzg; 2hyi; 7a5p; 8c6j; 2xb2; 2j0s; 5xjc; 3ex7; 4c9b; 2hxy; 7w5b; 7w5a; 7w59; 6icz; 5mqf; 6qdv; 7znj; 2j0u; 1fuu; 2vsx; 2vso; 5zbz; 2g9n; 7ddx; 3bor; 1qva; 1s2m; 4brw; 4bru; 1qde; 3g0h; 6b4i; 6b4j; 3fht; 3ews; 6b4k; 4ct5; 4ct4; 3pew; 3pey; 5elx; 3rrn; 5anr; 3rrm; 8enk; 1xti; 1xtk; 1xtj; 5sup; 7znk; 5suq; 7v2y; 7luv; 1hv8
					malonate ion	bound	MLI	6.03815	1	5zbz	1	56	7pq0; 6zmw; 8huj; 5zc9; 6xki; 7ppz; 3eiq; 2zu6; 2j0q; 5yzg; 2hyi; 7a5p; 8c6j; 2xb2; 2j0s; 5xjc; 3ex7; 4c9b; 7w5b; 7w5a; 7w59; 6icz; 5mqf; 6qdv; 7znj; 2j0u; 2vsx; 2vso; 5zbz; 7ddx; 4brw; 4bru; 1qde; 3g0h; 6b4i; 6b4j; 3fht; 3ews; 6b4k; 4ct4; 3pew; 3pey; 5elx; 3rrn; 5anr; 3rrm; 8enk; 1xti; 1xtk; 1xtj; 5sup; 7znk; 5suq; 7v2y; 7luv; 1hv8	63	7pq0; 6zmw; 8huj; 5zc9; 6xki; 7ppz; 3eiq; 2zu6; 2j0q; 5yzg; 2hyi; 7a5p; 8c6j; 2xb2; 2j0s; 5xjc; 3ex7; 4c9b; 2hxy; 7w5b; 7w5a; 7w59; 6icz; 5mqf; 6qdv; 7znj; 2j0u; 1fuu; 2vsx; 2vso; 5zbz; 2g9n; 7ddx; 3bor; 1qva; 1s2m; 4brw; 4bru; 1qde; 3g0h; 6b4i; 6b4j; 3fht; 3ews; 6b4k; 4ct5; 4ct4; 3pew; 3pey; 5elx; 3rrn; 5anr; 3rrm; 8enk; 1xti; 1xtk; 1xtj; 5sup; 7znk; 5suq; 7v2y; 7luv; 1hv8
					nitrate ion	bound	NO3	5.10757	1	3pew	1	56	7pq0; 6zmw; 8huj; 5zc9; 6xki; 7ppz; 3eiq; 2zu6; 2j0q; 5yzg; 2hyi; 7a5p; 8c6j; 2xb2; 2j0s; 5xjc; 3ex7; 4c9b; 7w5b; 7w5a; 7w59; 6icz; 5mqf; 6qdv; 7znj; 2j0u; 2vsx; 2vso; 5zbz; 7ddx; 4brw; 4bru; 1qde; 3g0h; 6b4i; 6b4j; 3fht; 3ews; 6b4k; 4ct4; 3pew; 3pey; 5elx; 3rrn; 5anr; 3rrm; 8enk; 1xti; 1xtk; 1xtj; 5sup; 7znk; 5suq; 7v2y; 7luv; 1hv8	63	7pq0; 6zmw; 8huj; 5zc9; 6xki; 7ppz; 3eiq; 2zu6; 2j0q; 5yzg; 2hyi; 7a5p; 8c6j; 2xb2; 2j0s; 5xjc; 3ex7; 4c9b; 2hxy; 7w5b; 7w5a; 7w59; 6icz; 5mqf; 6qdv; 7znj; 2j0u; 1fuu; 2vsx; 2vso; 5zbz; 2g9n; 7ddx; 3bor; 1qva; 1s2m; 4brw; 4bru; 1qde; 3g0h; 6b4i; 6b4j; 3fht; 3ews; 6b4k; 4ct5; 4ct4; 3pew; 3pey; 5elx; 3rrn; 5anr; 3rrm; 8enk; 1xti; 1xtk; 1xtj; 5sup; 7znk; 5suq; 7v2y; 7luv; 1hv8
					phosphate ion	bound	PO4	6.5255	1	4c9b	1	56	7pq0; 6zmw; 8huj; 5zc9; 6xki; 7ppz; 3eiq; 2zu6; 2j0q; 5yzg; 2hyi; 7a5p; 8c6j; 2xb2; 2j0s; 5xjc; 3ex7; 4c9b; 7w5b; 7w5a; 7w59; 6icz; 5mqf; 6qdv; 7znj; 2j0u; 2vsx; 2vso; 5zbz; 7ddx; 4brw; 4bru; 1qde; 3g0h; 6b4i; 6b4j; 3fht; 3ews; 6b4k; 4ct4; 3pew; 3pey; 5elx; 3rrn; 5anr; 3rrm; 8enk; 1xti; 1xtk; 1xtj; 5sup; 7znk; 5suq; 7v2y; 7luv; 1hv8	63	7pq0; 6zmw; 8huj; 5zc9; 6xki; 7ppz; 3eiq; 2zu6; 2j0q; 5yzg; 2hyi; 7a5p; 8c6j; 2xb2; 2j0s; 5xjc; 3ex7; 4c9b; 2hxy; 7w5b; 7w5a; 7w59; 6icz; 5mqf; 6qdv; 7znj; 2j0u; 1fuu; 2vsx; 2vso; 5zbz; 2g9n; 7ddx; 3bor; 1qva; 1s2m; 4brw; 4bru; 1qde; 3g0h; 6b4i; 6b4j; 3fht; 3ews; 6b4k; 4ct5; 4ct4; 3pew; 3pey; 5elx; 3rrn; 5anr; 3rrm; 8enk; 1xti; 1xtk; 1xtj; 5sup; 7znk; 5suq; 7v2y; 7luv; 1hv8
					tho2, hpr1, mft1, and thp2	polypeptide(L)		6.92734	1	5suq	1	56	7pq0; 6zmw; 8huj; 5zc9; 6xki; 7ppz; 3eiq; 2zu6; 2j0q; 5yzg; 2hyi; 7a5p; 8c6j; 2xb2; 2j0s; 5xjc; 3ex7; 4c9b; 7w5b; 7w5a; 7w59; 6icz; 5mqf; 6qdv; 7znj; 2j0u; 2vsx; 2vso; 5zbz; 7ddx; 4brw; 4bru; 1qde; 3g0h; 6b4i; 6b4j; 3fht; 3ews; 6b4k; 4ct4; 3pew; 3pey; 5elx; 3rrn; 5anr; 3rrm; 8enk; 1xti; 1xtk; 1xtj; 5sup; 7znk; 5suq; 7v2y; 7luv; 1hv8	63	7pq0; 6zmw; 8huj; 5zc9; 6xki; 7ppz; 3eiq; 2zu6; 2j0q; 5yzg; 2hyi; 7a5p; 8c6j; 2xb2; 2j0s; 5xjc; 3ex7; 4c9b; 2hxy; 7w5b; 7w5a; 7w59; 6icz; 5mqf; 6qdv; 7znj; 2j0u; 1fuu; 2vsx; 2vso; 5zbz; 2g9n; 7ddx; 3bor; 1qva; 1s2m; 4brw; 4bru; 1qde; 3g0h; 6b4i; 6b4j; 3fht; 3ews; 6b4k; 4ct5; 4ct4; 3pew; 3pey; 5elx; 3rrn; 5anr; 3rrm; 8enk; 1xti; 1xtk; 1xtj; 5sup; 7znk; 5suq; 7v2y; 7luv; 1hv8
15	ANP32A	NP_006296.1	L80R	-6.418					0		0	2	6xzq; 4xos	7	6xzq; 2je1; 4xos; 2je0; 2jqd; 2ell; 2rr6
7	UBE2H	NP_003335.1	D120V	-6.231	ubiquitin	polypeptide(L)		2.00907	19	2gmi; 6jb6; 5dfl; 6jb7; 7myf; 7ojx; 1fxt; 5tut; 5fer; 7zj3; 4ap4; 3ptf; 6ttu; 6sqo; 7ahz; 6sqr; 7r71; 7ai1; 6sqs	19	52	2z5d; 1yf9; 2yb6; 2ybf; 8iej; 6zhs; 5ojw; 6zht; 2gmi; 1jat; 7w75; 7w76; 2oxq; 5v0r; 3k9p; 3k9o; 6jb6; 2bep; 3f92; 3e46; 2o25; 2bf8; 6if1; 5dfl; 6jb7; 7myf; 7myh; 7ojx; 1fxt; 5tut; 5fer; 2yho; 4qpl; 6d4p; 7zj3; 4ap4; 3ptf; 3oj4; 1z2u; 4x57; 6ttu; 6sqo; 7ahz; 6sqr; 3eb6; 8gcb; 8gbq; 7r71; 7ai1; 6sqs; 4wz3; 6m2c	67	2z5d; 2onu; 1yf9; 1jas; 2y4w; 2yb6; 2ybf; 6cyr; 6cyo; 8iej; 2aak; 1q34; 1z3d; 1tte; 6zhs; 5ojw; 1jbb; 6zht; 2gmi; 1jat; 7w75; 7w76; 2oxq; 5v0r; 6mj9; 3k9p; 3k9o; 6jb6; 2bep; 3f92; 3e46; 2o25; 1yla; 2bf8; 6if1; 5dfl; 6jb7; 7myf; 7myh; 7ojx; 1fzy; 1fxt; 5tut; 5fer; 2yho; 4qpl; 2c4p; 6d4p; 7zj3; 4ap4; 3ptf; 3oj4; 1z2u; 4x57; 6ttu; 7bol; 6sqo; 7ahz; 6sqr; 3eb6; 8gcb; 8gbq; 7r71; 7ai1; 6sqs; 4wz3; 6m2c
					beta-mercaptoethanol	bound	BME	2.16869	4	2yb6; 2ybf; 2bep; 3f92	2	52	2z5d; 1yf9; 2yb6; 2ybf; 8iej; 6zhs; 5ojw; 6zht; 2gmi; 1jat; 7w75; 7w76; 2oxq; 5v0r; 3k9p; 3k9o; 6jb6; 2bep; 3f92; 3e46; 2o25; 2bf8; 6if1; 5dfl; 6jb7; 7myf; 7myh; 7ojx; 1fxt; 5tut; 5fer; 2yho; 4qpl; 6d4p; 7zj3; 4ap4; 3ptf; 3oj4; 1z2u; 4x57; 6ttu; 6sqo; 7ahz; 6sqr; 3eb6; 8gcb; 8gbq; 7r71; 7ai1; 6sqs; 4wz3; 6m2c	67	2z5d; 2onu; 1yf9; 1jas; 2y4w; 2yb6; 2ybf; 6cyr; 6cyo; 8iej; 2aak; 1q34; 1z3d; 1tte; 6zhs; 5ojw; 1jbb; 6zht; 2gmi; 1jat; 7w75; 7w76; 2oxq; 5v0r; 6mj9; 3k9p; 3k9o; 6jb6; 2bep; 3f92; 3e46; 2o25; 1yla; 2bf8; 6if1; 5dfl; 6jb7; 7myf; 7myh; 7ojx; 1fzy; 1fxt; 5tut; 5fer; 2yho; 4qpl; 2c4p; 6d4p; 7zj3; 4ap4; 3ptf; 3oj4; 1z2u; 4x57; 6ttu; 7bol; 6sqo; 7ahz; 6sqr; 3eb6; 8gcb; 8gbq; 7r71; 7ai1; 6sqs; 4wz3; 6m2c
					ubiquitin-activating enzyme e1 1	polypeptide(L)		1.97796	2	6zhs; 6zht	2	52	2z5d; 1yf9; 2yb6; 2ybf; 8iej; 6zhs; 5ojw; 6zht; 2gmi; 1jat; 7w75; 7w76; 2oxq; 5v0r; 3k9p; 3k9o; 6jb6; 2bep; 3f92; 3e46; 2o25; 2bf8; 6if1; 5dfl; 6jb7; 7myf; 7myh; 7ojx; 1fxt; 5tut; 5fer; 2yho; 4qpl; 6d4p; 7zj3; 4ap4; 3ptf; 3oj4; 1z2u; 4x57; 6ttu; 6sqo; 7ahz; 6sqr; 3eb6; 8gcb; 8gbq; 7r71; 7ai1; 6sqs; 4wz3; 6m2c	67	2z5d; 2onu; 1yf9; 1jas; 2y4w; 2yb6; 2ybf; 6cyr; 6cyo; 8iej; 2aak; 1q34; 1z3d; 1tte; 6zhs; 5ojw; 1jbb; 6zht; 2gmi; 1jat; 7w75; 7w76; 2oxq; 5v0r; 6mj9; 3k9p; 3k9o; 6jb6; 2bep; 3f92; 3e46; 2o25; 1yla; 2bf8; 6if1; 5dfl; 6jb7; 7myf; 7myh; 7ojx; 1fzy; 1fxt; 5tut; 5fer; 2yho; 4qpl; 2c4p; 6d4p; 7zj3; 4ap4; 3ptf; 3oj4; 1z2u; 4x57; 6ttu; 7bol; 6sqo; 7ahz; 6sqr; 3eb6; 8gcb; 8gbq; 7r71; 7ai1; 6sqs; 4wz3; 6m2c
					histone h2b type 1-k	polypeptide(L)		6.02107	1	8iej	0	52	2z5d; 1yf9; 2yb6; 2ybf; 8iej; 6zhs; 5ojw; 6zht; 2gmi; 1jat; 7w75; 7w76; 2oxq; 5v0r; 3k9p; 3k9o; 6jb6; 2bep; 3f92; 3e46; 2o25; 2bf8; 6if1; 5dfl; 6jb7; 7myf; 7myh; 7ojx; 1fxt; 5tut; 5fer; 2yho; 4qpl; 6d4p; 7zj3; 4ap4; 3ptf; 3oj4; 1z2u; 4x57; 6ttu; 6sqo; 7ahz; 6sqr; 3eb6; 8gcb; 8gbq; 7r71; 7ai1; 6sqs; 4wz3; 6m2c	67	2z5d; 2onu; 1yf9; 1jas; 2y4w; 2yb6; 2ybf; 6cyr; 6cyo; 8iej; 2aak; 1q34; 1z3d; 1tte; 6zhs; 5ojw; 1jbb; 6zht; 2gmi; 1jat; 7w75; 7w76; 2oxq; 5v0r; 6mj9; 3k9p; 3k9o; 6jb6; 2bep; 3f92; 3e46; 2o25; 1yla; 2bf8; 6if1; 5dfl; 6jb7; 7myf; 7myh; 7ojx; 1fzy; 1fxt; 5tut; 5fer; 2yho; 4qpl; 2c4p; 6d4p; 7zj3; 4ap4; 3ptf; 3oj4; 1z2u; 4x57; 6ttu; 7bol; 6sqo; 7ahz; 6sqr; 3eb6; 8gcb; 8gbq; 7r71; 7ai1; 6sqs; 4wz3; 6m2c
					nf-kappa-b inhibitor alpha	polypeptide(L)		4.31796	1	6ttu	1	52	2z5d; 1yf9; 2yb6; 2ybf; 8iej; 6zhs; 5ojw; 6zht; 2gmi; 1jat; 7w75; 7w76; 2oxq; 5v0r; 3k9p; 3k9o; 6jb6; 2bep; 3f92; 3e46; 2o25; 2bf8; 6if1; 5dfl; 6jb7; 7myf; 7myh; 7ojx; 1fxt; 5tut; 5fer; 2yho; 4qpl; 6d4p; 7zj3; 4ap4; 3ptf; 3oj4; 1z2u; 4x57; 6ttu; 6sqo; 7ahz; 6sqr; 3eb6; 8gcb; 8gbq; 7r71; 7ai1; 6sqs; 4wz3; 6m2c	67	2z5d; 2onu; 1yf9; 1jas; 2y4w; 2yb6; 2ybf; 6cyr; 6cyo; 8iej; 2aak; 1q34; 1z3d; 1tte; 6zhs; 5ojw; 1jbb; 6zht; 2gmi; 1jat; 7w75; 7w76; 2oxq; 5v0r; 6mj9; 3k9p; 3k9o; 6jb6; 2bep; 3f92; 3e46; 2o25; 1yla; 2bf8; 6if1; 5dfl; 6jb7; 7myf; 7myh; 7ojx; 1fzy; 1fxt; 5tut; 5fer; 2yho; 4qpl; 2c4p; 6d4p; 7zj3; 4ap4; 3ptf; 3oj4; 1z2u; 4x57; 6ttu; 7bol; 6sqo; 7ahz; 6sqr; 3eb6; 8gcb; 8gbq; 7r71; 7ai1; 6sqs; 4wz3; 6m2c
					1,1'-ethane-1,2-diylbis(1h-pyrrole-2,5-dione)	bound	ME7	1.76895	1	7ojx	0	52	2z5d; 1yf9; 2yb6; 2ybf; 8iej; 6zhs; 5ojw; 6zht; 2gmi; 1jat; 7w75; 7w76; 2oxq; 5v0r; 3k9p; 3k9o; 6jb6; 2bep; 3f92; 3e46; 2o25; 2bf8; 6if1; 5dfl; 6jb7; 7myf; 7myh; 7ojx; 1fxt; 5tut; 5fer; 2yho; 4qpl; 6d4p; 7zj3; 4ap4; 3ptf; 3oj4; 1z2u; 4x57; 6ttu; 6sqo; 7ahz; 6sqr; 3eb6; 8gcb; 8gbq; 7r71; 7ai1; 6sqs; 4wz3; 6m2c	67	2z5d; 2onu; 1yf9; 1jas; 2y4w; 2yb6; 2ybf; 6cyr; 6cyo; 8iej; 2aak; 1q34; 1z3d; 1tte; 6zhs; 5ojw; 1jbb; 6zht; 2gmi; 1jat; 7w75; 7w76; 2oxq; 5v0r; 6mj9; 3k9p; 3k9o; 6jb6; 2bep; 3f92; 3e46; 2o25; 1yla; 2bf8; 6if1; 5dfl; 6jb7; 7myf; 7myh; 7ojx; 1fzy; 1fxt; 5tut; 5fer; 2yho; 4qpl; 2c4p; 6d4p; 7zj3; 4ap4; 3ptf; 3oj4; 1z2u; 4x57; 6ttu; 7bol; 6sqo; 7ahz; 6sqr; 3eb6; 8gcb; 8gbq; 7r71; 7ai1; 6sqs; 4wz3; 6m2c
					e3 ubiquitin-protein ligase bre1	polypeptide(L)		6.61423	1	7w76	0	52	2z5d; 1yf9; 2yb6; 2ybf; 8iej; 6zhs; 5ojw; 6zht; 2gmi; 1jat; 7w75; 7w76; 2oxq; 5v0r; 3k9p; 3k9o; 6jb6; 2bep; 3f92; 3e46; 2o25; 2bf8; 6if1; 5dfl; 6jb7; 7myf; 7myh; 7ojx; 1fxt; 5tut; 5fer; 2yho; 4qpl; 6d4p; 7zj3; 4ap4; 3ptf; 3oj4; 1z2u; 4x57; 6ttu; 6sqo; 7ahz; 6sqr; 3eb6; 8gcb; 8gbq; 7r71; 7ai1; 6sqs; 4wz3; 6m2c	67	2z5d; 2onu; 1yf9; 1jas; 2y4w; 2yb6; 2ybf; 6cyr; 6cyo; 8iej; 2aak; 1q34; 1z3d; 1tte; 6zhs; 5ojw; 1jbb; 6zht; 2gmi; 1jat; 7w75; 7w76; 2oxq; 5v0r; 6mj9; 3k9p; 3k9o; 6jb6; 2bep; 3f92; 3e46; 2o25; 1yla; 2bf8; 6if1; 5dfl; 6jb7; 7myf; 7myh; 7ojx; 1fzy; 1fxt; 5tut; 5fer; 2yho; 4qpl; 2c4p; 6d4p; 7zj3; 4ap4; 3ptf; 3oj4; 1z2u; 4x57; 6ttu; 7bol; 6sqo; 7ahz; 6sqr; 3eb6; 8gcb; 8gbq; 7r71; 7ai1; 6sqs; 4wz3; 6m2c
					nitrate ion	bound	NO3	6.92804	1	6sqo	1	52	2z5d; 1yf9; 2yb6; 2ybf; 8iej; 6zhs; 5ojw; 6zht; 2gmi; 1jat; 7w75; 7w76; 2oxq; 5v0r; 3k9p; 3k9o; 6jb6; 2bep; 3f92; 3e46; 2o25; 2bf8; 6if1; 5dfl; 6jb7; 7myf; 7myh; 7ojx; 1fxt; 5tut; 5fer; 2yho; 4qpl; 6d4p; 7zj3; 4ap4; 3ptf; 3oj4; 1z2u; 4x57; 6ttu; 6sqo; 7ahz; 6sqr; 3eb6; 8gcb; 8gbq; 7r71; 7ai1; 6sqs; 4wz3; 6m2c	67	2z5d; 2onu; 1yf9; 1jas; 2y4w; 2yb6; 2ybf; 6cyr; 6cyo; 8iej; 2aak; 1q34; 1z3d; 1tte; 6zhs; 5ojw; 1jbb; 6zht; 2gmi; 1jat; 7w75; 7w76; 2oxq; 5v0r; 6mj9; 3k9p; 3k9o; 6jb6; 2bep; 3f92; 3e46; 2o25; 1yla; 2bf8; 6if1; 5dfl; 6jb7; 7myf; 7myh; 7ojx; 1fzy; 1fxt; 5tut; 5fer; 2yho; 4qpl; 2c4p; 6d4p; 7zj3; 4ap4; 3ptf; 3oj4; 1z2u; 4x57; 6ttu; 7bol; 6sqo; 7ahz; 6sqr; 3eb6; 8gcb; 8gbq; 7r71; 7ai1; 6sqs; 4wz3; 6m2c
2	XPO1	NP_003391.1	T448K	-6.21	gtp-binding nuclear protein ran	polypeptide(L)		2.91899	42	5dis; 3nc0; 3gjx; 3nby; 3nbz; 7b51; 6tvo; 3nc1; 6lq9; 5jlj; 5ysu; 4hax; 4gpt; 5zpu; 5ytb; 4hb2; 4hb4; 4hat; 5yst; 5yro; 4hav; 4hb0; 4haz; 4gmx; 4hau; 4hay; 4hb3; 6x2o; 4haw; 6x2m; 6xjs; 6xjt; 6xju; 6xjr; 7l5e; 6xjp; 5uww; 5uwh; 5uwq; 5uwt; 5uwr; 5uwi	8	47	5dis; 3nc0; 3gjx; 3nby; 3nbz; 7b51; 6tvo; 3nc1; 3gb8; 3wyf; 3m1i; 6lq9; 5jlj; 5ysu; 4hax; 4gpt; 5zpu; 5ytb; 4hb2; 4hb4; 4hat; 5yst; 5yro; 4hav; 4hb0; 4haz; 4gmx; 4hau; 4hay; 4hb3; 6x2o; 4haw; 6x2m; 6xjs; 6xjt; 6xju; 6xjr; 7l5e; 3wyg; 6xjp; 5uww; 5xoj; 5uwh; 5uwq; 5uwt; 5uwr; 5uwi	50	5dis; 3nc0; 3gjx; 3nby; 3nbz; 7b51; 6tvo; 3nc1; 3gb8; 4bsm; 4bsn; 3wyf; 3m1i; 6lq9; 5jlj; 5ysu; 4hax; 4gpt; 5zpu; 5ytb; 4hb2; 4hb4; 4hat; 5yst; 5yro; 4hav; 4hb0; 4haz; 4gmx; 4hau; 4hay; 4hb3; 6x2o; 4haw; 6x2m; 6xjs; 6xjt; 6xju; 6xjr; 7l5e; 3wyg; 6xjp; 5uww; 5xoj; 5uwh; 5uwq; 5uwt; 5uwr; 5uwi; 3vyc
					chloride ion	bound	CL	4.11455	4	6lq9; 5ysu; 5ytb; 5yst	0	47	5dis; 3nc0; 3gjx; 3nby; 3nbz; 7b51; 6tvo; 3nc1; 3gb8; 3wyf; 3m1i; 6lq9; 5jlj; 5ysu; 4hax; 4gpt; 5zpu; 5ytb; 4hb2; 4hb4; 4hat; 5yst; 5yro; 4hav; 4hb0; 4haz; 4gmx; 4hau; 4hay; 4hb3; 6x2o; 4haw; 6x2m; 6xjs; 6xjt; 6xju; 6xjr; 7l5e; 3wyg; 6xjp; 5uww; 5xoj; 5uwh; 5uwq; 5uwt; 5uwr; 5uwi	50	5dis; 3nc0; 3gjx; 3nby; 3nbz; 7b51; 6tvo; 3nc1; 3gb8; 4bsm; 4bsn; 3wyf; 3m1i; 6lq9; 5jlj; 5ysu; 4hax; 4gpt; 5zpu; 5ytb; 4hb2; 4hb4; 4hat; 5yst; 5yro; 4hav; 4hb0; 4haz; 4gmx; 4hau; 4hay; 4hb3; 6x2o; 4haw; 6x2m; 6xjs; 6xjt; 6xju; 6xjr; 7l5e; 3wyg; 6xjp; 5uww; 5xoj; 5uwh; 5uwq; 5uwt; 5uwr; 5uwi; 3vyc
					gtp-binding nuclear protein gsp1/cnr1	polypeptide(L)		3.55812	2	3m1i; 3wyg	0	47	5dis; 3nc0; 3gjx; 3nby; 3nbz; 7b51; 6tvo; 3nc1; 3gb8; 3wyf; 3m1i; 6lq9; 5jlj; 5ysu; 4hax; 4gpt; 5zpu; 5ytb; 4hb2; 4hb4; 4hat; 5yst; 5yro; 4hav; 4hb0; 4haz; 4gmx; 4hau; 4hay; 4hb3; 6x2o; 4haw; 6x2m; 6xjs; 6xjt; 6xju; 6xjr; 7l5e; 3wyg; 6xjp; 5uww; 5xoj; 5uwh; 5uwq; 5uwt; 5uwr; 5uwi	50	5dis; 3nc0; 3gjx; 3nby; 3nbz; 7b51; 6tvo; 3nc1; 3gb8; 4bsm; 4bsn; 3wyf; 3m1i; 6lq9; 5jlj; 5ysu; 4hax; 4gpt; 5zpu; 5ytb; 4hb2; 4hb4; 4hat; 5yst; 5yro; 4hav; 4hb0; 4haz; 4gmx; 4hau; 4hay; 4hb3; 6x2o; 4haw; 6x2m; 6xjs; 6xjt; 6xju; 6xjr; 7l5e; 3wyg; 6xjp; 5uww; 5xoj; 5uwh; 5uwq; 5uwt; 5uwr; 5uwi; 3vyc
					gsp1p	polypeptide(L)		3.76797	1	3wyf	0	47	5dis; 3nc0; 3gjx; 3nby; 3nbz; 7b51; 6tvo; 3nc1; 3gb8; 3wyf; 3m1i; 6lq9; 5jlj; 5ysu; 4hax; 4gpt; 5zpu; 5ytb; 4hb2; 4hb4; 4hat; 5yst; 5yro; 4hav; 4hb0; 4haz; 4gmx; 4hau; 4hay; 4hb3; 6x2o; 4haw; 6x2m; 6xjs; 6xjt; 6xju; 6xjr; 7l5e; 3wyg; 6xjp; 5uww; 5xoj; 5uwh; 5uwq; 5uwt; 5uwr; 5uwi	50	5dis; 3nc0; 3gjx; 3nby; 3nbz; 7b51; 6tvo; 3nc1; 3gb8; 4bsm; 4bsn; 3wyf; 3m1i; 6lq9; 5jlj; 5ysu; 4hax; 4gpt; 5zpu; 5ytb; 4hb2; 4hb4; 4hat; 5yst; 5yro; 4hav; 4hb0; 4haz; 4gmx; 4hau; 4hay; 4hb3; 6x2o; 4haw; 6x2m; 6xjs; 6xjt; 6xju; 6xjr; 7l5e; 3wyg; 6xjp; 5uww; 5xoj; 5uwh; 5uwq; 5uwt; 5uwr; 5uwi; 3vyc
					gtp-binding nuclear protein	polypeptide(L)		3.63965	1	5xoj	0	47	5dis; 3nc0; 3gjx; 3nby; 3nbz; 7b51; 6tvo; 3nc1; 3gb8; 3wyf; 3m1i; 6lq9; 5jlj; 5ysu; 4hax; 4gpt; 5zpu; 5ytb; 4hb2; 4hb4; 4hat; 5yst; 5yro; 4hav; 4hb0; 4haz; 4gmx; 4hau; 4hay; 4hb3; 6x2o; 4haw; 6x2m; 6xjs; 6xjt; 6xju; 6xjr; 7l5e; 3wyg; 6xjp; 5uww; 5xoj; 5uwh; 5uwq; 5uwt; 5uwr; 5uwi	50	5dis; 3nc0; 3gjx; 3nby; 3nbz; 7b51; 6tvo; 3nc1; 3gb8; 4bsm; 4bsn; 3wyf; 3m1i; 6lq9; 5jlj; 5ysu; 4hax; 4gpt; 5zpu; 5ytb; 4hb2; 4hb4; 4hat; 5yst; 5yro; 4hav; 4hb0; 4haz; 4gmx; 4hau; 4hay; 4hb3; 6x2o; 4haw; 6x2m; 6xjs; 6xjt; 6xju; 6xjr; 7l5e; 3wyg; 6xjp; 5uww; 5xoj; 5uwh; 5uwq; 5uwt; 5uwr; 5uwi; 3vyc
			S725R	-5.185	maltose/maltodextrin-binding periplasmic protein; nuclear pore complex protein nup214	polypeptide(L)		6.7967	1	5dis	1	77	5dis; 3nc0; 3gjx; 3nby; 3nbz; 7b51; 6tvo; 3nc1; 3gb8; 3wyf; 3m1i; 6lq9; 5jlj; 5ysu; 4hax; 4gpt; 5zpu; 5ytb; 4hb2; 4hb4; 4hat; 5yst; 5yro; 4hav; 4hb0; 4haz; 4gmx; 4hau; 4hay; 4hb3; 6x2o; 4haw; 6x2m; 6xjs; 6xjt; 6xju; 6xjr; 7l5e; 3wyg; 6xjp; 5uww; 5xoj; 5uwh; 5uwq; 5uwt; 5uwr; 5uwi; 5uwu; 7dbg; 5uwp; 5uws; 5uwo; 5uwj; 5dif; 5di9; 7cnd; 7ypz; 6a3a; 6a38; 6m60; 6a3e; 6cit; 6a3c; 6a3b; 6kft; 6x2s; 6x2…	80	5dis; 3nc0; 3gjx; 3nby; 3nbz; 7b51; 6tvo; 3nc1; 3gb8; 4bsm; 3wyf; 3m1i; 6lq9; 5jlj; 5ysu; 4hax; 4gpt; 5zpu; 5ytb; 4hb2; 4hb4; 4hat; 5yst; 5yro; 4hav; 4hb0; 4haz; 4gmx; 4hau; 4hay; 4hb3; 6x2o; 4haw; 6x2m; 6xjs; 6xjt; 6xju; 6xjr; 7l5e; 3wyg; 6xjp; 5uww; 5xoj; 5uwh; 5uwq; 5uwt; 5uwr; 5uwi; 5uwu; 7dbg; 5uwp; 5uws; 5uwo; 5uwj; 5dif; 5di9; 7cnd; 7ypz; 6a3a; 6a38; 6m60; 6a3e; 6cit; 6a3c; 6a3b; 6kft; 6x2…
					nup42p	polypeptide(L)		6.53221	1	5xoj	1	77	5dis; 3nc0; 3gjx; 3nby; 3nbz; 7b51; 6tvo; 3nc1; 3gb8; 3wyf; 3m1i; 6lq9; 5jlj; 5ysu; 4hax; 4gpt; 5zpu; 5ytb; 4hb2; 4hb4; 4hat; 5yst; 5yro; 4hav; 4hb0; 4haz; 4gmx; 4hau; 4hay; 4hb3; 6x2o; 4haw; 6x2m; 6xjs; 6xjt; 6xju; 6xjr; 7l5e; 3wyg; 6xjp; 5uww; 5xoj; 5uwh; 5uwq; 5uwt; 5uwr; 5uwi; 5uwu; 7dbg; 5uwp; 5uws; 5uwo; 5uwj; 5dif; 5di9; 7cnd; 7ypz; 6a3a; 6a38; 6m60; 6a3e; 6cit; 6a3c; 6a3b; 6kft; 6x2s; 6x2…	80	5dis; 3nc0; 3gjx; 3nby; 3nbz; 7b51; 6tvo; 3nc1; 3gb8; 4bsm; 3wyf; 3m1i; 6lq9; 5jlj; 5ysu; 4hax; 4gpt; 5zpu; 5ytb; 4hb2; 4hb4; 4hat; 5yst; 5yro; 4hav; 4hb0; 4haz; 4gmx; 4hau; 4hay; 4hb3; 6x2o; 4haw; 6x2m; 6xjs; 6xjt; 6xju; 6xjr; 7l5e; 3wyg; 6xjp; 5uww; 5xoj; 5uwh; 5uwq; 5uwt; 5uwr; 5uwi; 5uwu; 7dbg; 5uwp; 5uws; 5uwo; 5uwj; 5dif; 5di9; 7cnd; 7ypz; 6a3a; 6a38; 6m60; 6a3e; 6cit; 6a3c; 6a3b; 6kft; 6x2…
					snurportin-1	polypeptide(L)		7.9973	1	3gjx	1	77	5dis; 3nc0; 3gjx; 3nby; 3nbz; 7b51; 6tvo; 3nc1; 3gb8; 3wyf; 3m1i; 6lq9; 5jlj; 5ysu; 4hax; 4gpt; 5zpu; 5ytb; 4hb2; 4hb4; 4hat; 5yst; 5yro; 4hav; 4hb0; 4haz; 4gmx; 4hau; 4hay; 4hb3; 6x2o; 4haw; 6x2m; 6xjs; 6xjt; 6xju; 6xjr; 7l5e; 3wyg; 6xjp; 5uww; 5xoj; 5uwh; 5uwq; 5uwt; 5uwr; 5uwi; 5uwu; 7dbg; 5uwp; 5uws; 5uwo; 5uwj; 5dif; 5di9; 7cnd; 7ypz; 6a3a; 6a38; 6m60; 6a3e; 6cit; 6a3c; 6a3b; 6kft; 6x2s; 6x2…	80	5dis; 3nc0; 3gjx; 3nby; 3nbz; 7b51; 6tvo; 3nc1; 3gb8; 4bsm; 3wyf; 3m1i; 6lq9; 5jlj; 5ysu; 4hax; 4gpt; 5zpu; 5ytb; 4hb2; 4hb4; 4hat; 5yst; 5yro; 4hav; 4hb0; 4haz; 4gmx; 4hau; 4hay; 4hb3; 6x2o; 4haw; 6x2m; 6xjs; 6xjt; 6xju; 6xjr; 7l5e; 3wyg; 6xjp; 5uww; 5xoj; 5uwh; 5uwq; 5uwt; 5uwr; 5uwi; 5uwu; 7dbg; 5uwp; 5uws; 5uwo; 5uwj; 5dif; 5di9; 7cnd; 7ypz; 6a3a; 6a38; 6m60; 6a3e; 6cit; 6a3c; 6a3b; 6kft; 6x2…
			V784A	-5.162	snurportin-1	polypeptide(L)		6.81189	4	3nc0; 3gjx; 3nby; 3nbz	4	77	5dis; 3nc0; 3gjx; 3nby; 3nbz; 7b51; 6tvo; 3nc1; 3gb8; 3wyf; 3m1i; 6lq9; 5jlj; 5ysu; 4hax; 4gpt; 5zpu; 5ytb; 4hb2; 4hb4; 4hat; 5yst; 5yro; 4hav; 4hb0; 4haz; 4gmx; 4hau; 4hay; 4hb3; 6x2o; 4haw; 6x2m; 6xjs; 6xjt; 6xju; 6xjr; 7l5e; 3wyg; 6xjp; 5uww; 5xoj; 5uwh; 5uwq; 5uwt; 5uwr; 5uwi; 5uwu; 7dbg; 5uwp; 5uws; 5uwo; 5uwj; 5dif; 5di9; 7cnd; 7ypz; 6a3a; 6a38; 6m60; 6a3e; 6cit; 6a3c; 6a3b; 6kft; 6x2s; 6x2…	81	5dis; 3nc0; 3gjx; 3nby; 3nbz; 7b51; 6tvo; 3nc1; 3gb8; 4bsm; 4bsn; 3wyf; 3m1i; 6lq9; 5jlj; 5ysu; 4hax; 4gpt; 5zpu; 5ytb; 4hb2; 4hb4; 4hat; 5yst; 5yro; 4hav; 4hb0; 4haz; 4gmx; 4hau; 4hay; 4hb3; 6x2o; 4haw; 6x2m; 6xjs; 6xjt; 6xju; 6xjr; 7l5e; 3wyg; 6xjp; 5uww; 5xoj; 5uwh; 5uwq; 5uwt; 5uwr; 5uwi; 5uwu; 7dbg; 5uwp; 5uws; 5uwo; 5uwj; 5dif; 5di9; 7cnd; 7ypz; 6a3a; 6a38; 6m60; 6a3e; 6cit; 6a3c; 6a3b; 6kf…
					nup42p	polypeptide(L)		6.71302	1	5xoj	1	77	5dis; 3nc0; 3gjx; 3nby; 3nbz; 7b51; 6tvo; 3nc1; 3gb8; 3wyf; 3m1i; 6lq9; 5jlj; 5ysu; 4hax; 4gpt; 5zpu; 5ytb; 4hb2; 4hb4; 4hat; 5yst; 5yro; 4hav; 4hb0; 4haz; 4gmx; 4hau; 4hay; 4hb3; 6x2o; 4haw; 6x2m; 6xjs; 6xjt; 6xju; 6xjr; 7l5e; 3wyg; 6xjp; 5uww; 5xoj; 5uwh; 5uwq; 5uwt; 5uwr; 5uwi; 5uwu; 7dbg; 5uwp; 5uws; 5uwo; 5uwj; 5dif; 5di9; 7cnd; 7ypz; 6a3a; 6a38; 6m60; 6a3e; 6cit; 6a3c; 6a3b; 6kft; 6x2s; 6x2…	81	5dis; 3nc0; 3gjx; 3nby; 3nbz; 7b51; 6tvo; 3nc1; 3gb8; 4bsm; 4bsn; 3wyf; 3m1i; 6lq9; 5jlj; 5ysu; 4hax; 4gpt; 5zpu; 5ytb; 4hb2; 4hb4; 4hat; 5yst; 5yro; 4hav; 4hb0; 4haz; 4gmx; 4hau; 4hay; 4hb3; 6x2o; 4haw; 6x2m; 6xjs; 6xjt; 6xju; 6xjr; 7l5e; 3wyg; 6xjp; 5uww; 5xoj; 5uwh; 5uwq; 5uwt; 5uwr; 5uwi; 5uwu; 7dbg; 5uwp; 5uws; 5uwo; 5uwj; 5dif; 5di9; 7cnd; 7ypz; 6a3a; 6a38; 6m60; 6a3e; 6cit; 6a3c; 6a3b; 6kf…
			A881T	-5.152	nitrate ion	bound	NO3	7.09718	2	6lq9; 5ysu	2	77	5dis; 3nc0; 3gjx; 3nby; 3nbz; 7b51; 6tvo; 3nc1; 3gb8; 3wyf; 3m1i; 6lq9; 5jlj; 5ysu; 4hax; 4gpt; 5zpu; 5ytb; 4hb2; 4hb4; 4hat; 5yst; 5yro; 4hav; 4hb0; 4haz; 4gmx; 4hau; 4hay; 4hb3; 6x2o; 4haw; 6x2m; 6xjs; 6xjt; 6xju; 6xjr; 7l5e; 3wyg; 6xjp; 5uww; 5xoj; 5uwh; 5uwq; 5uwt; 5uwr; 5uwi; 5uwu; 7dbg; 5uwp; 5uws; 5uwo; 5uwj; 5dif; 5di9; 7cnd; 7ypz; 6a3a; 6a38; 6m60; 6a3e; 6cit; 6a3c; 6a3b; 6kft; 6x2s; 6x2…	80	5dis; 3nc0; 3gjx; 3nby; 3nbz; 7b51; 6tvo; 3nc1; 3gb8; 4bsm; 3wyf; 3m1i; 6lq9; 5jlj; 5ysu; 4hax; 4gpt; 5zpu; 5ytb; 4hb2; 4hb4; 4hat; 5yst; 5yro; 4hav; 4hb0; 4haz; 4gmx; 4hau; 4hay; 4hb3; 6x2o; 4haw; 6x2m; 6xjs; 6xjt; 6xju; 6xjr; 7l5e; 3wyg; 6xjp; 5uww; 5xoj; 5uwh; 5uwq; 5uwt; 5uwr; 5uwi; 5uwu; 7dbg; 5uwp; 5uws; 5uwo; 5uwj; 5dif; 5di9; 7cnd; 7ypz; 6a3a; 6a38; 6m60; 6a3e; 6cit; 6a3c; 6a3b; 6kft; 6x2…
					chloride ion	bound	CL	7.28232	1	7dbg	1	77	5dis; 3nc0; 3gjx; 3nby; 3nbz; 7b51; 6tvo; 3nc1; 3gb8; 3wyf; 3m1i; 6lq9; 5jlj; 5ysu; 4hax; 4gpt; 5zpu; 5ytb; 4hb2; 4hb4; 4hat; 5yst; 5yro; 4hav; 4hb0; 4haz; 4gmx; 4hau; 4hay; 4hb3; 6x2o; 4haw; 6x2m; 6xjs; 6xjt; 6xju; 6xjr; 7l5e; 3wyg; 6xjp; 5uww; 5xoj; 5uwh; 5uwq; 5uwt; 5uwr; 5uwi; 5uwu; 7dbg; 5uwp; 5uws; 5uwo; 5uwj; 5dif; 5di9; 7cnd; 7ypz; 6a3a; 6a38; 6m60; 6a3e; 6cit; 6a3c; 6a3b; 6kft; 6x2s; 6x2…	80	5dis; 3nc0; 3gjx; 3nby; 3nbz; 7b51; 6tvo; 3nc1; 3gb8; 4bsm; 3wyf; 3m1i; 6lq9; 5jlj; 5ysu; 4hax; 4gpt; 5zpu; 5ytb; 4hb2; 4hb4; 4hat; 5yst; 5yro; 4hav; 4hb0; 4haz; 4gmx; 4hau; 4hay; 4hb3; 6x2o; 4haw; 6x2m; 6xjs; 6xjt; 6xju; 6xjr; 7l5e; 3wyg; 6xjp; 5uww; 5xoj; 5uwh; 5uwq; 5uwt; 5uwr; 5uwi; 5uwu; 7dbg; 5uwp; 5uws; 5uwo; 5uwj; 5dif; 5di9; 7cnd; 7ypz; 6a3a; 6a38; 6m60; 6a3e; 6cit; 6a3c; 6a3b; 6kft; 6x2…
					maltose/maltodextrin-binding periplasmic protein; nuclear pore complex protein nup214	polypeptide(L)		6.7951	1	5dis	1	77	5dis; 3nc0; 3gjx; 3nby; 3nbz; 7b51; 6tvo; 3nc1; 3gb8; 3wyf; 3m1i; 6lq9; 5jlj; 5ysu; 4hax; 4gpt; 5zpu; 5ytb; 4hb2; 4hb4; 4hat; 5yst; 5yro; 4hav; 4hb0; 4haz; 4gmx; 4hau; 4hay; 4hb3; 6x2o; 4haw; 6x2m; 6xjs; 6xjt; 6xju; 6xjr; 7l5e; 3wyg; 6xjp; 5uww; 5xoj; 5uwh; 5uwq; 5uwt; 5uwr; 5uwi; 5uwu; 7dbg; 5uwp; 5uws; 5uwo; 5uwj; 5dif; 5di9; 7cnd; 7ypz; 6a3a; 6a38; 6m60; 6a3e; 6cit; 6a3c; 6a3b; 6kft; 6x2s; 6x2…	80	5dis; 3nc0; 3gjx; 3nby; 3nbz; 7b51; 6tvo; 3nc1; 3gb8; 4bsm; 3wyf; 3m1i; 6lq9; 5jlj; 5ysu; 4hax; 4gpt; 5zpu; 5ytb; 4hb2; 4hb4; 4hat; 5yst; 5yro; 4hav; 4hb0; 4haz; 4gmx; 4hau; 4hay; 4hb3; 6x2o; 4haw; 6x2m; 6xjs; 6xjt; 6xju; 6xjr; 7l5e; 3wyg; 6xjp; 5uww; 5xoj; 5uwh; 5uwq; 5uwt; 5uwr; 5uwi; 5uwu; 7dbg; 5uwp; 5uws; 5uwo; 5uwj; 5dif; 5di9; 7cnd; 7ypz; 6a3a; 6a38; 6m60; 6a3e; 6cit; 6a3c; 6a3b; 6kft; 6x2…
					nup42p	polypeptide(L)		6.94643	1	5xoj	1	77	5dis; 3nc0; 3gjx; 3nby; 3nbz; 7b51; 6tvo; 3nc1; 3gb8; 3wyf; 3m1i; 6lq9; 5jlj; 5ysu; 4hax; 4gpt; 5zpu; 5ytb; 4hb2; 4hb4; 4hat; 5yst; 5yro; 4hav; 4hb0; 4haz; 4gmx; 4hau; 4hay; 4hb3; 6x2o; 4haw; 6x2m; 6xjs; 6xjt; 6xju; 6xjr; 7l5e; 3wyg; 6xjp; 5uww; 5xoj; 5uwh; 5uwq; 5uwt; 5uwr; 5uwi; 5uwu; 7dbg; 5uwp; 5uws; 5uwo; 5uwj; 5dif; 5di9; 7cnd; 7ypz; 6a3a; 6a38; 6m60; 6a3e; 6cit; 6a3c; 6a3b; 6kft; 6x2s; 6x2…	80	5dis; 3nc0; 3gjx; 3nby; 3nbz; 7b51; 6tvo; 3nc1; 3gb8; 4bsm; 3wyf; 3m1i; 6lq9; 5jlj; 5ysu; 4hax; 4gpt; 5zpu; 5ytb; 4hb2; 4hb4; 4hat; 5yst; 5yro; 4hav; 4hb0; 4haz; 4gmx; 4hau; 4hay; 4hb3; 6x2o; 4haw; 6x2m; 6xjs; 6xjt; 6xju; 6xjr; 7l5e; 3wyg; 6xjp; 5uww; 5xoj; 5uwh; 5uwq; 5uwt; 5uwr; 5uwi; 5uwu; 7dbg; 5uwp; 5uws; 5uwo; 5uwj; 5dif; 5di9; 7cnd; 7ypz; 6a3a; 6a38; 6m60; 6a3e; 6cit; 6a3c; 6a3b; 6kft; 6x2…
X	OTUD5	NP_060072.1	L352P	-6.116					0		0	0		0
1	AMIGO1	NP_065754.2	L112P	-6.115					0		0	1	2xot	1	2xot
15	COPS2	NP_001137359.1	F69C	-6.083	inositol hexakisphosphate	bound	IHP	6.5484	1	6a73	1	56	6r7n; 6r7i; 6r6h; 6r7h; 6r7f; 4d10; 4d18; 4wsn; 6a73; 6epe; 6epf; 5gjq; 5gjr; 5l4k; 5ln3; 6epd; 6epc; 5vgz; 5vhf; 5vhh; 5vhi; 5m32; 6wjd; 7w37; 7w3c; 7qya; 7w3b; 5vfq; 5vfs; 7qxn; 8cvt; 6msk; 7w38; 6msh; 6msg; 6mse; 6msd; 6msb; 6msj; 7qyb; 5t0c; 7w39; 7w3f; 7w3g; 7w3h; 7w3i; 7w3j; 7w3k; 7w3m; 7qxu; 7qxw; 7w3a; 5vfp; 5t0g; 7qxp; 6wjn	56	6r7n; 6r7i; 6r6h; 6r7h; 6r7f; 4d10; 4d18; 4wsn; 6a73; 6epe; 6epf; 5gjq; 5gjr; 5l4k; 5ln3; 6epd; 6epc; 5vgz; 5vhf; 5vhh; 5vhi; 5m32; 6wjd; 7w37; 7w3c; 7qya; 7w3b; 5vfq; 5vfs; 7qxn; 8cvt; 6msk; 7w38; 6msh; 6msg; 6mse; 6msd; 6msb; 6msj; 7qyb; 5t0c; 7w39; 7w3f; 7w3g; 7w3h; 7w3i; 7w3j; 7w3k; 7w3m; 7qxu; 7qxw; 7w3a; 5vfp; 5t0g; 7qxp; 6wjn
X	RBBP7	NP_001185648.1	N325D	-5.966	polycomb protein suz12	polypeptide(L)		4.04941	9	5wai; 6wkr; 5wak; 7ktp; 7kso; 6c24; 6c23; 6nq3; 7ksr	9	51	3cfv; 3cfs; 6zrd; 7y5o; 7y5k; 7y5l; 7r1d; 4pc0; 4pby; 7y5v; 7y5u; 7m40; 8iqg; 8iqf; 7n40; 5wai; 6wkr; 5wak; 6g16; 7ktp; 7kso; 7aoa; 6c24; 6c23; 5y1u; 4pbz; 6nq3; 5fxy; 6zrc; 5xwr; 5xxq; 2yba; 6bw4; 6bw3; 3c99; 3c9c; 2xyi; 2xu7; 7ksr; 2yb8; 4r7a; 5vtb; 6s29; 6s1r; 5wjc; 4xyi; 8i03; 8i02; 4psw; 7xay; 4psx	55	3cfv; 3cfs; 7m3x; 6zrd; 7y5o; 7y5k; 7y5l; 7r1d; 4pc0; 4pby; 7y5v; 7y5u; 7m40; 8iqg; 8iqf; 7n40; 5wai; 6wkr; 5wak; 6g16; 7ktp; 7kso; 7aoa; 6c24; 6c23; 5y1u; 4pbz; 6nq3; 5fxy; 6zrc; 5xwr; 5xxq; 2yba; 6bw4; 6bw3; 3c99; 3c9c; 2xyi; 2xu7; 7ksr; 2yb8; 4r7a; 5vtb; 3gfc; 6s29; 6s1r; 6s1l; 5wjc; 4xyi; 4xyh; 8i03; 8i02; 4psw; 7xay; 4psx
					chromatin assembly factor 1 subunit a	polypeptide(L)		5.63475	4	7y5o; 7y5k; 7y5l; 8iqg	4	51	3cfv; 3cfs; 6zrd; 7y5o; 7y5k; 7y5l; 7r1d; 4pc0; 4pby; 7y5v; 7y5u; 7m40; 8iqg; 8iqf; 7n40; 5wai; 6wkr; 5wak; 6g16; 7ktp; 7kso; 7aoa; 6c24; 6c23; 5y1u; 4pbz; 6nq3; 5fxy; 6zrc; 5xwr; 5xxq; 2yba; 6bw4; 6bw3; 3c99; 3c9c; 2xyi; 2xu7; 7ksr; 2yb8; 4r7a; 5vtb; 6s29; 6s1r; 5wjc; 4xyi; 8i03; 8i02; 4psw; 7xay; 4psx	55	3cfv; 3cfs; 7m3x; 6zrd; 7y5o; 7y5k; 7y5l; 7r1d; 4pc0; 4pby; 7y5v; 7y5u; 7m40; 8iqg; 8iqf; 7n40; 5wai; 6wkr; 5wak; 6g16; 7ktp; 7kso; 7aoa; 6c24; 6c23; 5y1u; 4pbz; 6nq3; 5fxy; 6zrc; 5xwr; 5xxq; 2yba; 6bw4; 6bw3; 3c99; 3c9c; 2xyi; 2xu7; 7ksr; 2yb8; 4r7a; 5vtb; 3gfc; 6s29; 6s1r; 6s1l; 5wjc; 4xyi; 4xyh; 8i03; 8i02; 4psw; 7xay; 4psx
					metastasis-associated protein mta1	polypeptide(L)		3.27227	3	6g16; 7aoa; 5fxy	3	51	3cfv; 3cfs; 6zrd; 7y5o; 7y5k; 7y5l; 7r1d; 4pc0; 4pby; 7y5v; 7y5u; 7m40; 8iqg; 8iqf; 7n40; 5wai; 6wkr; 5wak; 6g16; 7ktp; 7kso; 7aoa; 6c24; 6c23; 5y1u; 4pbz; 6nq3; 5fxy; 6zrc; 5xwr; 5xxq; 2yba; 6bw4; 6bw3; 3c99; 3c9c; 2xyi; 2xu7; 7ksr; 2yb8; 4r7a; 5vtb; 6s29; 6s1r; 5wjc; 4xyi; 8i03; 8i02; 4psw; 7xay; 4psx	55	3cfv; 3cfs; 7m3x; 6zrd; 7y5o; 7y5k; 7y5l; 7r1d; 4pc0; 4pby; 7y5v; 7y5u; 7m40; 8iqg; 8iqf; 7n40; 5wai; 6wkr; 5wak; 6g16; 7ktp; 7kso; 7aoa; 6c24; 6c23; 5y1u; 4pbz; 6nq3; 5fxy; 6zrc; 5xwr; 5xxq; 2yba; 6bw4; 6bw3; 3c99; 3c9c; 2xyi; 2xu7; 7ksr; 2yb8; 4r7a; 5vtb; 3gfc; 6s29; 6s1r; 6s1l; 5wjc; 4xyi; 4xyh; 8i03; 8i02; 4psw; 7xay; 4psx
					histone acetyltransferase type b catalytic subunit	polypeptide(L)		4.83782	2	4psw; 4psx	0	51	3cfv; 3cfs; 6zrd; 7y5o; 7y5k; 7y5l; 7r1d; 4pc0; 4pby; 7y5v; 7y5u; 7m40; 8iqg; 8iqf; 7n40; 5wai; 6wkr; 5wak; 6g16; 7ktp; 7kso; 7aoa; 6c24; 6c23; 5y1u; 4pbz; 6nq3; 5fxy; 6zrc; 5xwr; 5xxq; 2yba; 6bw4; 6bw3; 3c99; 3c9c; 2xyi; 2xu7; 7ksr; 2yb8; 4r7a; 5vtb; 6s29; 6s1r; 5wjc; 4xyi; 8i03; 8i02; 4psw; 7xay; 4psx	55	3cfv; 3cfs; 7m3x; 6zrd; 7y5o; 7y5k; 7y5l; 7r1d; 4pc0; 4pby; 7y5v; 7y5u; 7m40; 8iqg; 8iqf; 7n40; 5wai; 6wkr; 5wak; 6g16; 7ktp; 7kso; 7aoa; 6c24; 6c23; 5y1u; 4pbz; 6nq3; 5fxy; 6zrc; 5xwr; 5xxq; 2yba; 6bw4; 6bw3; 3c99; 3c9c; 2xyi; 2xu7; 7ksr; 2yb8; 4r7a; 5vtb; 3gfc; 6s29; 6s1r; 6s1l; 5wjc; 4xyi; 4xyh; 8i03; 8i02; 4psw; 7xay; 4psx
					histone acetyltransferase type b catalytic subunit; soluble cytochrome b562	polypeptide(L)		4.86887	1	7xay	0	51	3cfv; 3cfs; 6zrd; 7y5o; 7y5k; 7y5l; 7r1d; 4pc0; 4pby; 7y5v; 7y5u; 7m40; 8iqg; 8iqf; 7n40; 5wai; 6wkr; 5wak; 6g16; 7ktp; 7kso; 7aoa; 6c24; 6c23; 5y1u; 4pbz; 6nq3; 5fxy; 6zrc; 5xwr; 5xxq; 2yba; 6bw4; 6bw3; 3c99; 3c9c; 2xyi; 2xu7; 7ksr; 2yb8; 4r7a; 5vtb; 6s29; 6s1r; 5wjc; 4xyi; 8i03; 8i02; 4psw; 7xay; 4psx	55	3cfv; 3cfs; 7m3x; 6zrd; 7y5o; 7y5k; 7y5l; 7r1d; 4pc0; 4pby; 7y5v; 7y5u; 7m40; 8iqg; 8iqf; 7n40; 5wai; 6wkr; 5wak; 6g16; 7ktp; 7kso; 7aoa; 6c24; 6c23; 5y1u; 4pbz; 6nq3; 5fxy; 6zrc; 5xwr; 5xxq; 2yba; 6bw4; 6bw3; 3c99; 3c9c; 2xyi; 2xu7; 7ksr; 2yb8; 4r7a; 5vtb; 3gfc; 6s29; 6s1r; 6s1l; 5wjc; 4xyi; 4xyh; 8i03; 8i02; 4psw; 7xay; 4psx
					cenp-a recruiting complex protein mis19	polypeptide(L)		5.48578	1	6s29	1	51	3cfv; 3cfs; 6zrd; 7y5o; 7y5k; 7y5l; 7r1d; 4pc0; 4pby; 7y5v; 7y5u; 7m40; 8iqg; 8iqf; 7n40; 5wai; 6wkr; 5wak; 6g16; 7ktp; 7kso; 7aoa; 6c24; 6c23; 5y1u; 4pbz; 6nq3; 5fxy; 6zrc; 5xwr; 5xxq; 2yba; 6bw4; 6bw3; 3c99; 3c9c; 2xyi; 2xu7; 7ksr; 2yb8; 4r7a; 5vtb; 6s29; 6s1r; 5wjc; 4xyi; 8i03; 8i02; 4psw; 7xay; 4psx	55	3cfv; 3cfs; 7m3x; 6zrd; 7y5o; 7y5k; 7y5l; 7r1d; 4pc0; 4pby; 7y5v; 7y5u; 7m40; 8iqg; 8iqf; 7n40; 5wai; 6wkr; 5wak; 6g16; 7ktp; 7kso; 7aoa; 6c24; 6c23; 5y1u; 4pbz; 6nq3; 5fxy; 6zrc; 5xwr; 5xxq; 2yba; 6bw4; 6bw3; 3c99; 3c9c; 2xyi; 2xu7; 7ksr; 2yb8; 4r7a; 5vtb; 3gfc; 6s29; 6s1r; 6s1l; 5wjc; 4xyi; 4xyh; 8i03; 8i02; 4psw; 7xay; 4psx
					calcium ion	bound	CA	7.17743	1	4pc0	1	51	3cfv; 3cfs; 6zrd; 7y5o; 7y5k; 7y5l; 7r1d; 4pc0; 4pby; 7y5v; 7y5u; 7m40; 8iqg; 8iqf; 7n40; 5wai; 6wkr; 5wak; 6g16; 7ktp; 7kso; 7aoa; 6c24; 6c23; 5y1u; 4pbz; 6nq3; 5fxy; 6zrc; 5xwr; 5xxq; 2yba; 6bw4; 6bw3; 3c99; 3c9c; 2xyi; 2xu7; 7ksr; 2yb8; 4r7a; 5vtb; 6s29; 6s1r; 5wjc; 4xyi; 8i03; 8i02; 4psw; 7xay; 4psx	55	3cfv; 3cfs; 7m3x; 6zrd; 7y5o; 7y5k; 7y5l; 7r1d; 4pc0; 4pby; 7y5v; 7y5u; 7m40; 8iqg; 8iqf; 7n40; 5wai; 6wkr; 5wak; 6g16; 7ktp; 7kso; 7aoa; 6c24; 6c23; 5y1u; 4pbz; 6nq3; 5fxy; 6zrc; 5xwr; 5xxq; 2yba; 6bw4; 6bw3; 3c99; 3c9c; 2xyi; 2xu7; 7ksr; 2yb8; 4r7a; 5vtb; 3gfc; 6s29; 6s1r; 6s1l; 5wjc; 4xyi; 4xyh; 8i03; 8i02; 4psw; 7xay; 4psx
					histone h4	polypeptide(L)		4.55239	1	3cfv	1	51	3cfv; 3cfs; 6zrd; 7y5o; 7y5k; 7y5l; 7r1d; 4pc0; 4pby; 7y5v; 7y5u; 7m40; 8iqg; 8iqf; 7n40; 5wai; 6wkr; 5wak; 6g16; 7ktp; 7kso; 7aoa; 6c24; 6c23; 5y1u; 4pbz; 6nq3; 5fxy; 6zrc; 5xwr; 5xxq; 2yba; 6bw4; 6bw3; 3c99; 3c9c; 2xyi; 2xu7; 7ksr; 2yb8; 4r7a; 5vtb; 6s29; 6s1r; 5wjc; 4xyi; 8i03; 8i02; 4psw; 7xay; 4psx	55	3cfv; 3cfs; 7m3x; 6zrd; 7y5o; 7y5k; 7y5l; 7r1d; 4pc0; 4pby; 7y5v; 7y5u; 7m40; 8iqg; 8iqf; 7n40; 5wai; 6wkr; 5wak; 6g16; 7ktp; 7kso; 7aoa; 6c24; 6c23; 5y1u; 4pbz; 6nq3; 5fxy; 6zrc; 5xwr; 5xxq; 2yba; 6bw4; 6bw3; 3c99; 3c9c; 2xyi; 2xu7; 7ksr; 2yb8; 4r7a; 5vtb; 3gfc; 6s29; 6s1r; 6s1l; 5wjc; 4xyi; 4xyh; 8i03; 8i02; 4psw; 7xay; 4psx
					paired amphipathic helix protein pst3	polypeptide(L)		6.82716	1	8i03	1	51	3cfv; 3cfs; 6zrd; 7y5o; 7y5k; 7y5l; 7r1d; 4pc0; 4pby; 7y5v; 7y5u; 7m40; 8iqg; 8iqf; 7n40; 5wai; 6wkr; 5wak; 6g16; 7ktp; 7kso; 7aoa; 6c24; 6c23; 5y1u; 4pbz; 6nq3; 5fxy; 6zrc; 5xwr; 5xxq; 2yba; 6bw4; 6bw3; 3c99; 3c9c; 2xyi; 2xu7; 7ksr; 2yb8; 4r7a; 5vtb; 6s29; 6s1r; 5wjc; 4xyi; 8i03; 8i02; 4psw; 7xay; 4psx	55	3cfv; 3cfs; 7m3x; 6zrd; 7y5o; 7y5k; 7y5l; 7r1d; 4pc0; 4pby; 7y5v; 7y5u; 7m40; 8iqg; 8iqf; 7n40; 5wai; 6wkr; 5wak; 6g16; 7ktp; 7kso; 7aoa; 6c24; 6c23; 5y1u; 4pbz; 6nq3; 5fxy; 6zrc; 5xwr; 5xxq; 2yba; 6bw4; 6bw3; 3c99; 3c9c; 2xyi; 2xu7; 7ksr; 2yb8; 4r7a; 5vtb; 3gfc; 6s29; 6s1r; 6s1l; 5wjc; 4xyi; 4xyh; 8i03; 8i02; 4psw; 7xay; 4psx
					paired amphipathic helix protein pst2	polypeptide(L)		6.13407	1	8i02	1	51	3cfv; 3cfs; 6zrd; 7y5o; 7y5k; 7y5l; 7r1d; 4pc0; 4pby; 7y5v; 7y5u; 7m40; 8iqg; 8iqf; 7n40; 5wai; 6wkr; 5wak; 6g16; 7ktp; 7kso; 7aoa; 6c24; 6c23; 5y1u; 4pbz; 6nq3; 5fxy; 6zrc; 5xwr; 5xxq; 2yba; 6bw4; 6bw3; 3c99; 3c9c; 2xyi; 2xu7; 7ksr; 2yb8; 4r7a; 5vtb; 6s29; 6s1r; 5wjc; 4xyi; 8i03; 8i02; 4psw; 7xay; 4psx	55	3cfv; 3cfs; 7m3x; 6zrd; 7y5o; 7y5k; 7y5l; 7r1d; 4pc0; 4pby; 7y5v; 7y5u; 7m40; 8iqg; 8iqf; 7n40; 5wai; 6wkr; 5wak; 6g16; 7ktp; 7kso; 7aoa; 6c24; 6c23; 5y1u; 4pbz; 6nq3; 5fxy; 6zrc; 5xwr; 5xxq; 2yba; 6bw4; 6bw3; 3c99; 3c9c; 2xyi; 2xu7; 7ksr; 2yb8; 4r7a; 5vtb; 3gfc; 6s29; 6s1r; 6s1l; 5wjc; 4xyi; 4xyh; 8i03; 8i02; 4psw; 7xay; 4psx
X	ZMYM3	NP_963893.1	C454R	-5.951					0		0	0		0
22	DDX17	NP_001091974.1	V484M	-5.891	adenosine-5'-diphosphate	bound	ADP	6.35673	9	6uv1; 6uv2; 6uv4; 6uv3; 4d26; 7pmq; 7pli; 7pmm; 3ex7	5	53	6uv1; 6uv2; 6uv4; 6uv3; 6uv0; 8arp; 6y5q; 7evo; 7vpx; 6y53; 7evn; 4nho; 6qx9; 6qw6; 3jcr; 4pxa; 7liu; 6ah0; 5e7j; 6cz5; 5e7m; 2i4i; 4ljy; 2db3; 4lk2; 7oqb; 7oqe; 4kbf; 4kbg; 4d26; 4d25; 5dtu; 1hv8; 4w7s; 5zwn; 7pmq; 7pli; 7pmm; 3ex7; 7znj; 7w5b; 2j0q; 2xb2; 7w5a; 7w59; 6icz; 7a5p; 6qdv; 5xjc; 2j0s; 2hyi; 5yzg; 8c6j	57	6uv1; 6uv2; 6uv4; 6uv3; 6uv0; 8arp; 8ark; 6y5q; 7evo; 7vpx; 6y53; 8dpe; 7evn; 4nho; 6qx9; 6qw6; 3jcr; 4pxa; 7liu; 6ah0; 5e7j; 5e7i; 6cz5; 5e7m; 2i4i; 4ljy; 2db3; 4lk2; 7oqb; 7oqe; 4kbf; 4kbg; 4d26; 4d25; 5dtu; 1hv8; 4w7s; 5zwn; 7pmq; 7pli; 7pmm; 3ex7; 7znj; 7w5b; 2j0q; 2xb2; 7w5a; 7w59; 6icz; 7a5p; 6qdv; 5xjc; 2j0s; 2hxy; 2hyi; 5yzg; 8c6j
					phosphoaminophosphonic acid-adenylate ester	bound	ANP	6.40813	7	2db3; 4d25; 7znj; 2j0q; 2xb2; 2j0s; 2hyi	5	53	6uv1; 6uv2; 6uv4; 6uv3; 6uv0; 8arp; 6y5q; 7evo; 7vpx; 6y53; 7evn; 4nho; 6qx9; 6qw6; 3jcr; 4pxa; 7liu; 6ah0; 5e7j; 6cz5; 5e7m; 2i4i; 4ljy; 2db3; 4lk2; 7oqb; 7oqe; 4kbf; 4kbg; 4d26; 4d25; 5dtu; 1hv8; 4w7s; 5zwn; 7pmq; 7pli; 7pmm; 3ex7; 7znj; 7w5b; 2j0q; 2xb2; 7w5a; 7w59; 6icz; 7a5p; 6qdv; 5xjc; 2j0s; 2hyi; 5yzg; 8c6j	57	6uv1; 6uv2; 6uv4; 6uv3; 6uv0; 8arp; 8ark; 6y5q; 7evo; 7vpx; 6y53; 8dpe; 7evn; 4nho; 6qx9; 6qw6; 3jcr; 4pxa; 7liu; 6ah0; 5e7j; 5e7i; 6cz5; 5e7m; 2i4i; 4ljy; 2db3; 4lk2; 7oqb; 7oqe; 4kbf; 4kbg; 4d26; 4d25; 5dtu; 1hv8; 4w7s; 5zwn; 7pmq; 7pli; 7pmm; 3ex7; 7znj; 7w5b; 2j0q; 2xb2; 7w5a; 7w59; 6icz; 7a5p; 6qdv; 5xjc; 2j0s; 2hxy; 2hyi; 5yzg; 8c6j
					adenosine-5'-triphosphate	bound	ATP	2.5858	4	6qdv; 5xjc; 5yzg; 8c6j	4	53	6uv1; 6uv2; 6uv4; 6uv3; 6uv0; 8arp; 6y5q; 7evo; 7vpx; 6y53; 7evn; 4nho; 6qx9; 6qw6; 3jcr; 4pxa; 7liu; 6ah0; 5e7j; 6cz5; 5e7m; 2i4i; 4ljy; 2db3; 4lk2; 7oqb; 7oqe; 4kbf; 4kbg; 4d26; 4d25; 5dtu; 1hv8; 4w7s; 5zwn; 7pmq; 7pli; 7pmm; 3ex7; 7znj; 7w5b; 2j0q; 2xb2; 7w5a; 7w59; 6icz; 7a5p; 6qdv; 5xjc; 2j0s; 2hyi; 5yzg; 8c6j	57	6uv1; 6uv2; 6uv4; 6uv3; 6uv0; 8arp; 8ark; 6y5q; 7evo; 7vpx; 6y53; 8dpe; 7evn; 4nho; 6qx9; 6qw6; 3jcr; 4pxa; 7liu; 6ah0; 5e7j; 5e7i; 6cz5; 5e7m; 2i4i; 4ljy; 2db3; 4lk2; 7oqb; 7oqe; 4kbf; 4kbg; 4d26; 4d25; 5dtu; 1hv8; 4w7s; 5zwn; 7pmq; 7pli; 7pmm; 3ex7; 7znj; 7w5b; 2j0q; 2xb2; 7w5a; 7w59; 6icz; 7a5p; 6qdv; 5xjc; 2j0s; 2hxy; 2hyi; 5yzg; 8c6j
					[[[(2r,3s,4r,5r)-5-(6-aminopurin-9-yl)-3,4-bis(oxidanyl)oxolan-2-yl]methoxy-oxidanyl-phosphoryl]oxy-oxidanyl-phosphoryl]oxy-tris(fluoranyl)beryllium	bound	08T	6.88654	1	7liu	0	53	6uv1; 6uv2; 6uv4; 6uv3; 6uv0; 8arp; 6y5q; 7evo; 7vpx; 6y53; 7evn; 4nho; 6qx9; 6qw6; 3jcr; 4pxa; 7liu; 6ah0; 5e7j; 6cz5; 5e7m; 2i4i; 4ljy; 2db3; 4lk2; 7oqb; 7oqe; 4kbf; 4kbg; 4d26; 4d25; 5dtu; 1hv8; 4w7s; 5zwn; 7pmq; 7pli; 7pmm; 3ex7; 7znj; 7w5b; 2j0q; 2xb2; 7w5a; 7w59; 6icz; 7a5p; 6qdv; 5xjc; 2j0s; 2hyi; 5yzg; 8c6j	57	6uv1; 6uv2; 6uv4; 6uv3; 6uv0; 8arp; 8ark; 6y5q; 7evo; 7vpx; 6y53; 8dpe; 7evn; 4nho; 6qx9; 6qw6; 3jcr; 4pxa; 7liu; 6ah0; 5e7j; 5e7i; 6cz5; 5e7m; 2i4i; 4ljy; 2db3; 4lk2; 7oqb; 7oqe; 4kbf; 4kbg; 4d26; 4d25; 5dtu; 1hv8; 4w7s; 5zwn; 7pmq; 7pli; 7pmm; 3ex7; 7znj; 7w5b; 2j0q; 2xb2; 7w5a; 7w59; 6icz; 7a5p; 6qdv; 5xjc; 2j0s; 2hxy; 2hyi; 5yzg; 8c6j
					pre-mrna-splicing factor cwc22 homolog	polypeptide(L)		7.10937	1	8c6j	1	53	6uv1; 6uv2; 6uv4; 6uv3; 6uv0; 8arp; 6y5q; 7evo; 7vpx; 6y53; 7evn; 4nho; 6qx9; 6qw6; 3jcr; 4pxa; 7liu; 6ah0; 5e7j; 6cz5; 5e7m; 2i4i; 4ljy; 2db3; 4lk2; 7oqb; 7oqe; 4kbf; 4kbg; 4d26; 4d25; 5dtu; 1hv8; 4w7s; 5zwn; 7pmq; 7pli; 7pmm; 3ex7; 7znj; 7w5b; 2j0q; 2xb2; 7w5a; 7w59; 6icz; 7a5p; 6qdv; 5xjc; 2j0s; 2hyi; 5yzg; 8c6j	57	6uv1; 6uv2; 6uv4; 6uv3; 6uv0; 8arp; 8ark; 6y5q; 7evo; 7vpx; 6y53; 8dpe; 7evn; 4nho; 6qx9; 6qw6; 3jcr; 4pxa; 7liu; 6ah0; 5e7j; 5e7i; 6cz5; 5e7m; 2i4i; 4ljy; 2db3; 4lk2; 7oqb; 7oqe; 4kbf; 4kbg; 4d26; 4d25; 5dtu; 1hv8; 4w7s; 5zwn; 7pmq; 7pli; 7pmm; 3ex7; 7znj; 7w5b; 2j0q; 2xb2; 7w5a; 7w59; 6icz; 7a5p; 6qdv; 5xjc; 2j0s; 2hxy; 2hyi; 5yzg; 8c6j
					beryllium trifluoride ion	bound	BEF	7.99382	1	7pli	0	53	6uv1; 6uv2; 6uv4; 6uv3; 6uv0; 8arp; 6y5q; 7evo; 7vpx; 6y53; 7evn; 4nho; 6qx9; 6qw6; 3jcr; 4pxa; 7liu; 6ah0; 5e7j; 6cz5; 5e7m; 2i4i; 4ljy; 2db3; 4lk2; 7oqb; 7oqe; 4kbf; 4kbg; 4d26; 4d25; 5dtu; 1hv8; 4w7s; 5zwn; 7pmq; 7pli; 7pmm; 3ex7; 7znj; 7w5b; 2j0q; 2xb2; 7w5a; 7w59; 6icz; 7a5p; 6qdv; 5xjc; 2j0s; 2hyi; 5yzg; 8c6j	57	6uv1; 6uv2; 6uv4; 6uv3; 6uv0; 8arp; 8ark; 6y5q; 7evo; 7vpx; 6y53; 8dpe; 7evn; 4nho; 6qx9; 6qw6; 3jcr; 4pxa; 7liu; 6ah0; 5e7j; 5e7i; 6cz5; 5e7m; 2i4i; 4ljy; 2db3; 4lk2; 7oqb; 7oqe; 4kbf; 4kbg; 4d26; 4d25; 5dtu; 1hv8; 4w7s; 5zwn; 7pmq; 7pli; 7pmm; 3ex7; 7znj; 7w5b; 2j0q; 2xb2; 7w5a; 7w59; 6icz; 7a5p; 6qdv; 5xjc; 2j0s; 2hxy; 2hyi; 5yzg; 8c6j
					magnesium ion	bound	MG	3.85454	1	6uv1	1	53	6uv1; 6uv2; 6uv4; 6uv3; 6uv0; 8arp; 6y5q; 7evo; 7vpx; 6y53; 7evn; 4nho; 6qx9; 6qw6; 3jcr; 4pxa; 7liu; 6ah0; 5e7j; 6cz5; 5e7m; 2i4i; 4ljy; 2db3; 4lk2; 7oqb; 7oqe; 4kbf; 4kbg; 4d26; 4d25; 5dtu; 1hv8; 4w7s; 5zwn; 7pmq; 7pli; 7pmm; 3ex7; 7znj; 7w5b; 2j0q; 2xb2; 7w5a; 7w59; 6icz; 7a5p; 6qdv; 5xjc; 2j0s; 2hyi; 5yzg; 8c6j	57	6uv1; 6uv2; 6uv4; 6uv3; 6uv0; 8arp; 8ark; 6y5q; 7evo; 7vpx; 6y53; 8dpe; 7evn; 4nho; 6qx9; 6qw6; 3jcr; 4pxa; 7liu; 6ah0; 5e7j; 5e7i; 6cz5; 5e7m; 2i4i; 4ljy; 2db3; 4lk2; 7oqb; 7oqe; 4kbf; 4kbg; 4d26; 4d25; 5dtu; 1hv8; 4w7s; 5zwn; 7pmq; 7pli; 7pmm; 3ex7; 7znj; 7w5b; 2j0q; 2xb2; 7w5a; 7w59; 6icz; 7a5p; 6qdv; 5xjc; 2j0s; 2hxy; 2hyi; 5yzg; 8c6j
					splicing factor 3b subunit 1	polypeptide(L)		6.65987	1	7evn	0	53	6uv1; 6uv2; 6uv4; 6uv3; 6uv0; 8arp; 6y5q; 7evo; 7vpx; 6y53; 7evn; 4nho; 6qx9; 6qw6; 3jcr; 4pxa; 7liu; 6ah0; 5e7j; 6cz5; 5e7m; 2i4i; 4ljy; 2db3; 4lk2; 7oqb; 7oqe; 4kbf; 4kbg; 4d26; 4d25; 5dtu; 1hv8; 4w7s; 5zwn; 7pmq; 7pli; 7pmm; 3ex7; 7znj; 7w5b; 2j0q; 2xb2; 7w5a; 7w59; 6icz; 7a5p; 6qdv; 5xjc; 2j0s; 2hyi; 5yzg; 8c6j	57	6uv1; 6uv2; 6uv4; 6uv3; 6uv0; 8arp; 8ark; 6y5q; 7evo; 7vpx; 6y53; 8dpe; 7evn; 4nho; 6qx9; 6qw6; 3jcr; 4pxa; 7liu; 6ah0; 5e7j; 5e7i; 6cz5; 5e7m; 2i4i; 4ljy; 2db3; 4lk2; 7oqb; 7oqe; 4kbf; 4kbg; 4d26; 4d25; 5dtu; 1hv8; 4w7s; 5zwn; 7pmq; 7pli; 7pmm; 3ex7; 7znj; 7w5b; 2j0q; 2xb2; 7w5a; 7w59; 6icz; 7a5p; 6qdv; 5xjc; 2j0s; 2hxy; 2hyi; 5yzg; 8c6j
9	SPIN1	NP_006708.2	Y170C	-5.864	histone h3.2	polypeptide(L)		3.04487	5	7bqz; 7bu9; 4mzg; 4mzf; 4mzh	5	21	7bqz; 7bu9; 7cna; 2ns2; 7e9m; 4h75; 7ea1; 8gtx; 5jsj; 4mzg; 5y5w; 5jsg; 4mzf; 4mzh; 7ocb; 6i8b; 6i8l; 6qpl; 6i8y; 5lug; 4uy4	22	7bqz; 7bu9; 7cna; 2ns2; 7e9m; 4h75; 7ea1; 8gtx; 5jsj; 4mzg; 5y5w; 5jsg; 4mzf; 4mzh; 7ocb; 6i8b; 6i8l; 6qpl; 6i8y; 5a1h; 5lug; 4uy4
					chloride ion	bound	CL	6.63295	4	5jsj; 4mzg; 5jsg; 4mzf	4	21	7bqz; 7bu9; 7cna; 2ns2; 7e9m; 4h75; 7ea1; 8gtx; 5jsj; 4mzg; 5y5w; 5jsg; 4mzf; 4mzh; 7ocb; 6i8b; 6i8l; 6qpl; 6i8y; 5lug; 4uy4	22	7bqz; 7bu9; 7cna; 2ns2; 7e9m; 4h75; 7ea1; 8gtx; 5jsj; 4mzg; 5y5w; 5jsg; 4mzf; 4mzh; 7ocb; 6i8b; 6i8l; 6qpl; 6i8y; 5a1h; 5lug; 4uy4
					(4s)-2-methyl-2,4-pentanediol	bound	MPD	2.36734	4	4mzg; 7ocb; 6i8l; 6qpl	4	21	7bqz; 7bu9; 7cna; 2ns2; 7e9m; 4h75; 7ea1; 8gtx; 5jsj; 4mzg; 5y5w; 5jsg; 4mzf; 4mzh; 7ocb; 6i8b; 6i8l; 6qpl; 6i8y; 5lug; 4uy4	22	7bqz; 7bu9; 7cna; 2ns2; 7e9m; 4h75; 7ea1; 8gtx; 5jsj; 4mzg; 5y5w; 5jsg; 4mzf; 4mzh; 7ocb; 6i8b; 6i8l; 6qpl; 6i8y; 5a1h; 5lug; 4uy4
					spindlin interactor and repressor of chromatin-binding protein	polypeptide(L)		3.78714	3	7cna; 7e9m; 7ea1	3	21	7bqz; 7bu9; 7cna; 2ns2; 7e9m; 4h75; 7ea1; 8gtx; 5jsj; 4mzg; 5y5w; 5jsg; 4mzf; 4mzh; 7ocb; 6i8b; 6i8l; 6qpl; 6i8y; 5lug; 4uy4	22	7bqz; 7bu9; 7cna; 2ns2; 7e9m; 4h75; 7ea1; 8gtx; 5jsj; 4mzg; 5y5w; 5jsg; 4mzf; 4mzh; 7ocb; 6i8b; 6i8l; 6qpl; 6i8y; 5a1h; 5lug; 4uy4
					histone h3.1	polypeptide(L)		3.51379	2	5lug; 4uy4	2	21	7bqz; 7bu9; 7cna; 2ns2; 7e9m; 4h75; 7ea1; 8gtx; 5jsj; 4mzg; 5y5w; 5jsg; 4mzf; 4mzh; 7ocb; 6i8b; 6i8l; 6qpl; 6i8y; 5lug; 4uy4	22	7bqz; 7bu9; 7cna; 2ns2; 7e9m; 4h75; 7ea1; 8gtx; 5jsj; 4mzg; 5y5w; 5jsg; 4mzf; 4mzh; 7ocb; 6i8b; 6i8l; 6qpl; 6i8y; 5a1h; 5lug; 4uy4
					histone peptide h4k20(me3)	polypeptide(L)		3.25931	1	5y5w	1	21	7bqz; 7bu9; 7cna; 2ns2; 7e9m; 4h75; 7ea1; 8gtx; 5jsj; 4mzg; 5y5w; 5jsg; 4mzf; 4mzh; 7ocb; 6i8b; 6i8l; 6qpl; 6i8y; 5lug; 4uy4	22	7bqz; 7bu9; 7cna; 2ns2; 7e9m; 4h75; 7ea1; 8gtx; 5jsj; 4mzg; 5y5w; 5jsg; 4mzf; 4mzh; 7ocb; 6i8b; 6i8l; 6qpl; 6i8y; 5a1h; 5lug; 4uy4
					ala-arg-thr-m3l-gln-thr-ala-arg-m3l-ser-gly	polypeptide(L)		3.44359	1	7cna	1	21	7bqz; 7bu9; 7cna; 2ns2; 7e9m; 4h75; 7ea1; 8gtx; 5jsj; 4mzg; 5y5w; 5jsg; 4mzf; 4mzh; 7ocb; 6i8b; 6i8l; 6qpl; 6i8y; 5lug; 4uy4	22	7bqz; 7bu9; 7cna; 2ns2; 7e9m; 4h75; 7ea1; 8gtx; 5jsj; 4mzg; 5y5w; 5jsg; 4mzf; 4mzh; 7ocb; 6i8b; 6i8l; 6qpl; 6i8y; 5a1h; 5lug; 4uy4
					ala-arg-thr-m3l-gln-thr-ala-arg-m3l-ser-thr	polypeptide(L)		3.48692	1	7cna	1	21	7bqz; 7bu9; 7cna; 2ns2; 7e9m; 4h75; 7ea1; 8gtx; 5jsj; 4mzg; 5y5w; 5jsg; 4mzf; 4mzh; 7ocb; 6i8b; 6i8l; 6qpl; 6i8y; 5lug; 4uy4	22	7bqz; 7bu9; 7cna; 2ns2; 7e9m; 4h75; 7ea1; 8gtx; 5jsj; 4mzg; 5y5w; 5jsg; 4mzf; 4mzh; 7ocb; 6i8b; 6i8l; 6qpl; 6i8y; 5a1h; 5lug; 4uy4
					2-[4-[2-[[2-[3-[2-azanyl-5-(cyclopropylmethoxy)-3,3-dimethyl-indol-6-yl]oxypropyl]-1,3-dihydroisoindol-5-yl]oxy]ethyl]-1,2,3-triazol-1-yl]-1-[4-(2-pyrrolidin-1-ylethyl)piperidin-1-yl]ethanone	bound	H7T	2.69005	1	6i8b	1	21	7bqz; 7bu9; 7cna; 2ns2; 7e9m; 4h75; 7ea1; 8gtx; 5jsj; 4mzg; 5y5w; 5jsg; 4mzf; 4mzh; 7ocb; 6i8b; 6i8l; 6qpl; 6i8y; 5lug; 4uy4	22	7bqz; 7bu9; 7cna; 2ns2; 7e9m; 4h75; 7ea1; 8gtx; 5jsj; 4mzg; 5y5w; 5jsg; 4mzf; 4mzh; 7ocb; 6i8b; 6i8l; 6qpl; 6i8y; 5a1h; 5lug; 4uy4
					[2-(phenylamino)-1,4-phenylene]bis({4-[2-(pyrrolidin-1-yl)ethyl]piperidin-1-yl}methanone)	bound	6P9	3.57388	1	5jsg	1	21	7bqz; 7bu9; 7cna; 2ns2; 7e9m; 4h75; 7ea1; 8gtx; 5jsj; 4mzg; 5y5w; 5jsg; 4mzf; 4mzh; 7ocb; 6i8b; 6i8l; 6qpl; 6i8y; 5lug; 4uy4	22	7bqz; 7bu9; 7cna; 2ns2; 7e9m; 4h75; 7ea1; 8gtx; 5jsj; 4mzg; 5y5w; 5jsg; 4mzf; 4mzh; 7ocb; 6i8b; 6i8l; 6qpl; 6i8y; 5a1h; 5lug; 4uy4
					[4-(2-pyrrolidin-1-ylethyl)piperidin-1-yl]-[4-[4-(2-pyrrolidin-1-ylethyl)piperidin-1-yl]carbonyl-3-[[4-(pyrrolidin-1-ylmethoxy)phenyl]amino]phenyl]methanone	bound	6PD	3.60413	1	5jsj	1	21	7bqz; 7bu9; 7cna; 2ns2; 7e9m; 4h75; 7ea1; 8gtx; 5jsj; 4mzg; 5y5w; 5jsg; 4mzf; 4mzh; 7ocb; 6i8b; 6i8l; 6qpl; 6i8y; 5lug; 4uy4	22	7bqz; 7bu9; 7cna; 2ns2; 7e9m; 4h75; 7ea1; 8gtx; 5jsj; 4mzg; 5y5w; 5jsg; 4mzf; 4mzh; 7ocb; 6i8b; 6i8l; 6qpl; 6i8y; 5a1h; 5lug; 4uy4
					glycine	bound	GLY	3.83037	1	6i8b	1	21	7bqz; 7bu9; 7cna; 2ns2; 7e9m; 4h75; 7ea1; 8gtx; 5jsj; 4mzg; 5y5w; 5jsg; 4mzf; 4mzh; 7ocb; 6i8b; 6i8l; 6qpl; 6i8y; 5lug; 4uy4	22	7bqz; 7bu9; 7cna; 2ns2; 7e9m; 4h75; 7ea1; 8gtx; 5jsj; 4mzg; 5y5w; 5jsg; 4mzf; 4mzh; 7ocb; 6i8b; 6i8l; 6qpl; 6i8y; 5a1h; 5lug; 4uy4
					hbx	polypeptide(L)		4.54529	1	8gtx	1	21	7bqz; 7bu9; 7cna; 2ns2; 7e9m; 4h75; 7ea1; 8gtx; 5jsj; 4mzg; 5y5w; 5jsg; 4mzf; 4mzh; 7ocb; 6i8b; 6i8l; 6qpl; 6i8y; 5lug; 4uy4	22	7bqz; 7bu9; 7cna; 2ns2; 7e9m; 4h75; 7ea1; 8gtx; 5jsj; 4mzg; 5y5w; 5jsg; 4mzf; 4mzh; 7ocb; 6i8b; 6i8l; 6qpl; 6i8y; 5a1h; 5lug; 4uy4
					histone h3-7	polypeptide(L)		3.89199	1	4h75	1	21	7bqz; 7bu9; 7cna; 2ns2; 7e9m; 4h75; 7ea1; 8gtx; 5jsj; 4mzg; 5y5w; 5jsg; 4mzf; 4mzh; 7ocb; 6i8b; 6i8l; 6qpl; 6i8y; 5lug; 4uy4	22	7bqz; 7bu9; 7cna; 2ns2; 7e9m; 4h75; 7ea1; 8gtx; 5jsj; 4mzg; 5y5w; 5jsg; 4mzf; 4mzh; 7ocb; 6i8b; 6i8l; 6qpl; 6i8y; 5a1h; 5lug; 4uy4
					5'-(cyclopropylmethoxy)-6'-[3-(1,3-dihydroisoindol-2-yl)propoxy]spiro[cyclopentane-1,3'-indole]-2'-amine	bound	H7Q	2.74477	1	6i8l	1	21	7bqz; 7bu9; 7cna; 2ns2; 7e9m; 4h75; 7ea1; 8gtx; 5jsj; 4mzg; 5y5w; 5jsg; 4mzf; 4mzh; 7ocb; 6i8b; 6i8l; 6qpl; 6i8y; 5lug; 4uy4	22	7bqz; 7bu9; 7cna; 2ns2; 7e9m; 4h75; 7ea1; 8gtx; 5jsj; 4mzg; 5y5w; 5jsg; 4mzf; 4mzh; 7ocb; 6i8b; 6i8l; 6qpl; 6i8y; 5a1h; 5lug; 4uy4
					5'-methoxy-6'-[3-(pyrrolidin-1-yl)propoxy]spiro[cyclobutane-1,3'-indol]-2'-amine	bound	2OD	3.6452	1	6i8y	1	21	7bqz; 7bu9; 7cna; 2ns2; 7e9m; 4h75; 7ea1; 8gtx; 5jsj; 4mzg; 5y5w; 5jsg; 4mzf; 4mzh; 7ocb; 6i8b; 6i8l; 6qpl; 6i8y; 5lug; 4uy4	22	7bqz; 7bu9; 7cna; 2ns2; 7e9m; 4h75; 7ea1; 8gtx; 5jsj; 4mzg; 5y5w; 5jsg; 4mzf; 4mzh; 7ocb; 6i8b; 6i8l; 6qpl; 6i8y; 5a1h; 5lug; 4uy4
					7-[3-(1,3-dihydroisoindol-2-yl)propoxy]-2n-[2-(dimethylamino)ethyl]-6-methoxy-4n-(1-propan-2-ylpiperidin-4-yl)quinazoline-2,4-diamine	bound	V88	2.7858	1	7ocb	1	21	7bqz; 7bu9; 7cna; 2ns2; 7e9m; 4h75; 7ea1; 8gtx; 5jsj; 4mzg; 5y5w; 5jsg; 4mzf; 4mzh; 7ocb; 6i8b; 6i8l; 6qpl; 6i8y; 5lug; 4uy4	22	7bqz; 7bu9; 7cna; 2ns2; 7e9m; 4h75; 7ea1; 8gtx; 5jsj; 4mzg; 5y5w; 5jsg; 4mzf; 4mzh; 7ocb; 6i8b; 6i8l; 6qpl; 6i8y; 5a1h; 5lug; 4uy4
					[3-(aminomethyl)-5-[3-(1,3-dihydroisoindol-2-yl)propoxy]-4-methoxy-phenyl]methanamine	bound	JC5	2.87858	1	6qpl	1	21	7bqz; 7bu9; 7cna; 2ns2; 7e9m; 4h75; 7ea1; 8gtx; 5jsj; 4mzg; 5y5w; 5jsg; 4mzf; 4mzh; 7ocb; 6i8b; 6i8l; 6qpl; 6i8y; 5lug; 4uy4	22	7bqz; 7bu9; 7cna; 2ns2; 7e9m; 4h75; 7ea1; 8gtx; 5jsj; 4mzg; 5y5w; 5jsg; 4mzf; 4mzh; 7ocb; 6i8b; 6i8l; 6qpl; 6i8y; 5a1h; 5lug; 4uy4
					benzamidine	bound	BEN	5.96384	1	7cna	1	21	7bqz; 7bu9; 7cna; 2ns2; 7e9m; 4h75; 7ea1; 8gtx; 5jsj; 4mzg; 5y5w; 5jsg; 4mzf; 4mzh; 7ocb; 6i8b; 6i8l; 6qpl; 6i8y; 5lug; 4uy4	22	7bqz; 7bu9; 7cna; 2ns2; 7e9m; 4h75; 7ea1; 8gtx; 5jsj; 4mzg; 5y5w; 5jsg; 4mzf; 4mzh; 7ocb; 6i8b; 6i8l; 6qpl; 6i8y; 5a1h; 5lug; 4uy4
14	WARS1	NP_004175.2	G163V	-5.857	tryptophan	bound	TRP	2.93719	10	2azx; 2quj; 2quh; 2ake; 2dr2; 3kt6; 3hv0; 4jfa; 3tze; 3a05	9	21	5ujj; 1r6t; 2qui; 2azx; 1r6u; 2quj; 2quh; 2ake; 2dr2; 3kt3; 3kt6; 3kt8; 3hv0; 3kt0; 4j75; 4jfa; 3tze; 3foc; 3jxe; 3a05; 3a04	29	5ujj; 1r6t; 2qui; 2azx; 1r6u; 2quj; 2quh; 1ulh; 1o5t; 2quk; 2ake; 2dr2; 5uji; 3kt3; 3kt6; 3kt8; 3hv0; 3kt0; 2ip1; 3i05; 4j75; 4j76; 4jfa; 3tze; 3foc; 3jxe; 3hzr; 3a05; 3a04
					sulfate ion	bound	SO4	4.21051	7	2azx; 2ake; 2dr2; 3kt3; 3kt6; 3kt8; 3jxe	7	21	5ujj; 1r6t; 2qui; 2azx; 1r6u; 2quj; 2quh; 2ake; 2dr2; 3kt3; 3kt6; 3kt8; 3hv0; 3kt0; 4j75; 4jfa; 3tze; 3foc; 3jxe; 3a05; 3a04	29	5ujj; 1r6t; 2qui; 2azx; 1r6u; 2quj; 2quh; 1ulh; 1o5t; 2quk; 2ake; 2dr2; 5uji; 3kt3; 3kt6; 3kt8; 3hv0; 3kt0; 2ip1; 3i05; 4j75; 4j76; 4jfa; 3tze; 3foc; 3jxe; 3hzr; 3a05; 3a04
					tryptophanyl-5'amp	bound	TYM	2.6728	7	5ujj; 1r6t; 1r6u; 2quj; 3kt3; 4j75; 3jxe	7	21	5ujj; 1r6t; 2qui; 2azx; 1r6u; 2quj; 2quh; 2ake; 2dr2; 3kt3; 3kt6; 3kt8; 3hv0; 3kt0; 4j75; 4jfa; 3tze; 3foc; 3jxe; 3a05; 3a04	29	5ujj; 1r6t; 2qui; 2azx; 1r6u; 2quj; 2quh; 1ulh; 1o5t; 2quk; 2ake; 2dr2; 5uji; 3kt3; 3kt6; 3kt8; 3hv0; 3kt0; 2ip1; 3i05; 4j75; 4j76; 4jfa; 3tze; 3foc; 3jxe; 3hzr; 3a05; 3a04
					l-tryptophanamide	bound	LTN	3.34507	2	2qui; 3kt8	2	21	5ujj; 1r6t; 2qui; 2azx; 1r6u; 2quj; 2quh; 2ake; 2dr2; 3kt3; 3kt6; 3kt8; 3hv0; 3kt0; 4j75; 4jfa; 3tze; 3foc; 3jxe; 3a05; 3a04	29	5ujj; 1r6t; 2qui; 2azx; 1r6u; 2quj; 2quh; 1ulh; 1o5t; 2quk; 2ake; 2dr2; 5uji; 3kt3; 3kt6; 3kt8; 3hv0; 3kt0; 2ip1; 3i05; 4j75; 4j76; 4jfa; 3tze; 3foc; 3jxe; 3hzr; 3a05; 3a04
					magnesium ion	bound	MG	2.98616	2	5ujj; 2qui	2	21	5ujj; 1r6t; 2qui; 2azx; 1r6u; 2quj; 2quh; 2ake; 2dr2; 3kt3; 3kt6; 3kt8; 3hv0; 3kt0; 4j75; 4jfa; 3tze; 3foc; 3jxe; 3a05; 3a04	29	5ujj; 1r6t; 2qui; 2azx; 1r6u; 2quj; 2quh; 1ulh; 1o5t; 2quk; 2ake; 2dr2; 5uji; 3kt3; 3kt6; 3kt8; 3hv0; 3kt0; 2ip1; 3i05; 4j75; 4j76; 4jfa; 3tze; 3foc; 3jxe; 3hzr; 3a05; 3a04
					(2s)-1-{[(2s)-3-(2-methoxyethoxy)-2-methylpropyl]oxy}propan-2-amine	bound	EMN	5.07863	1	3kt0	1	21	5ujj; 1r6t; 2qui; 2azx; 1r6u; 2quj; 2quh; 2ake; 2dr2; 3kt3; 3kt6; 3kt8; 3hv0; 3kt0; 4j75; 4jfa; 3tze; 3foc; 3jxe; 3a05; 3a04	29	5ujj; 1r6t; 2qui; 2azx; 1r6u; 2quj; 2quh; 1ulh; 1o5t; 2quk; 2ake; 2dr2; 5uji; 3kt3; 3kt6; 3kt8; 3hv0; 3kt0; 2ip1; 3i05; 4j75; 4j76; 4jfa; 3tze; 3foc; 3jxe; 3hzr; 3a05; 3a04
					adenosine-5'-triphosphate	bound	ATP	3.54405	1	2qui	1	21	5ujj; 1r6t; 2qui; 2azx; 1r6u; 2quj; 2quh; 2ake; 2dr2; 3kt3; 3kt6; 3kt8; 3hv0; 3kt0; 4j75; 4jfa; 3tze; 3foc; 3jxe; 3a05; 3a04	29	5ujj; 1r6t; 2qui; 2azx; 1r6u; 2quj; 2quh; 1ulh; 1o5t; 2quk; 2ake; 2dr2; 5uji; 3kt3; 3kt6; 3kt8; 3hv0; 3kt0; 2ip1; 3i05; 4j75; 4j76; 4jfa; 3tze; 3foc; 3jxe; 3hzr; 3a05; 3a04
					cadmium ion	bound	CD	5.07254	1	3a05	0	21	5ujj; 1r6t; 2qui; 2azx; 1r6u; 2quj; 2quh; 2ake; 2dr2; 3kt3; 3kt6; 3kt8; 3hv0; 3kt0; 4j75; 4jfa; 3tze; 3foc; 3jxe; 3a05; 3a04	29	5ujj; 1r6t; 2qui; 2azx; 1r6u; 2quj; 2quh; 1ulh; 1o5t; 2quk; 2ake; 2dr2; 5uji; 3kt3; 3kt6; 3kt8; 3hv0; 3kt0; 2ip1; 3i05; 4j75; 4j76; 4jfa; 3tze; 3foc; 3jxe; 3hzr; 3a05; 3a04
			R162W	-5.417	tryptophan	bound	TRP	3.30635	10	2azx; 2quj; 2quh; 2ake; 2dr2; 3kt6; 3hv0; 4jfa; 3tze; 3a05	9	21	5ujj; 1r6t; 2qui; 2azx; 1r6u; 2quj; 2quh; 2ake; 2dr2; 3kt3; 3kt6; 3kt8; 3hv0; 3kt0; 4j75; 4jfa; 3tze; 3foc; 3jxe; 3a05; 3a04	29	5ujj; 1r6t; 2qui; 2azx; 1r6u; 2quj; 2quh; 1ulh; 1o5t; 2quk; 2ake; 2dr2; 5uji; 3kt3; 3kt6; 3kt8; 3hv0; 3kt0; 2ip1; 3i05; 4j75; 4j76; 4jfa; 3tze; 3foc; 3jxe; 3hzr; 3a05; 3a04
					sulfate ion	bound	SO4	2.86004	7	2azx; 2ake; 2dr2; 3kt3; 3kt6; 3kt8; 3jxe	7	21	5ujj; 1r6t; 2qui; 2azx; 1r6u; 2quj; 2quh; 2ake; 2dr2; 3kt3; 3kt6; 3kt8; 3hv0; 3kt0; 4j75; 4jfa; 3tze; 3foc; 3jxe; 3a05; 3a04	29	5ujj; 1r6t; 2qui; 2azx; 1r6u; 2quj; 2quh; 1ulh; 1o5t; 2quk; 2ake; 2dr2; 5uji; 3kt3; 3kt6; 3kt8; 3hv0; 3kt0; 2ip1; 3i05; 4j75; 4j76; 4jfa; 3tze; 3foc; 3jxe; 3hzr; 3a05; 3a04
					tryptophanyl-5'amp	bound	TYM	2.77374	7	5ujj; 1r6t; 1r6u; 2quj; 3kt3; 4j75; 3jxe	7	21	5ujj; 1r6t; 2qui; 2azx; 1r6u; 2quj; 2quh; 2ake; 2dr2; 3kt3; 3kt6; 3kt8; 3hv0; 3kt0; 4j75; 4jfa; 3tze; 3foc; 3jxe; 3a05; 3a04	29	5ujj; 1r6t; 2qui; 2azx; 1r6u; 2quj; 2quh; 1ulh; 1o5t; 2quk; 2ake; 2dr2; 5uji; 3kt3; 3kt6; 3kt8; 3hv0; 3kt0; 2ip1; 3i05; 4j75; 4j76; 4jfa; 3tze; 3foc; 3jxe; 3hzr; 3a05; 3a04
					l-tryptophanamide	bound	LTN	3.64749	2	2qui; 3kt8	2	21	5ujj; 1r6t; 2qui; 2azx; 1r6u; 2quj; 2quh; 2ake; 2dr2; 3kt3; 3kt6; 3kt8; 3hv0; 3kt0; 4j75; 4jfa; 3tze; 3foc; 3jxe; 3a05; 3a04	29	5ujj; 1r6t; 2qui; 2azx; 1r6u; 2quj; 2quh; 1ulh; 1o5t; 2quk; 2ake; 2dr2; 5uji; 3kt3; 3kt6; 3kt8; 3hv0; 3kt0; 2ip1; 3i05; 4j75; 4j76; 4jfa; 3tze; 3foc; 3jxe; 3hzr; 3a05; 3a04
					magnesium ion	bound	MG	3.24903	2	5ujj; 2qui	2	21	5ujj; 1r6t; 2qui; 2azx; 1r6u; 2quj; 2quh; 2ake; 2dr2; 3kt3; 3kt6; 3kt8; 3hv0; 3kt0; 4j75; 4jfa; 3tze; 3foc; 3jxe; 3a05; 3a04	29	5ujj; 1r6t; 2qui; 2azx; 1r6u; 2quj; 2quh; 1ulh; 1o5t; 2quk; 2ake; 2dr2; 5uji; 3kt3; 3kt6; 3kt8; 3hv0; 3kt0; 2ip1; 3i05; 4j75; 4j76; 4jfa; 3tze; 3foc; 3jxe; 3hzr; 3a05; 3a04
					(2s)-1-{[(2s)-3-(2-methoxyethoxy)-2-methylpropyl]oxy}propan-2-amine	bound	EMN	4.19381	1	3kt0	1	21	5ujj; 1r6t; 2qui; 2azx; 1r6u; 2quj; 2quh; 2ake; 2dr2; 3kt3; 3kt6; 3kt8; 3hv0; 3kt0; 4j75; 4jfa; 3tze; 3foc; 3jxe; 3a05; 3a04	29	5ujj; 1r6t; 2qui; 2azx; 1r6u; 2quj; 2quh; 1ulh; 1o5t; 2quk; 2ake; 2dr2; 5uji; 3kt3; 3kt6; 3kt8; 3hv0; 3kt0; 2ip1; 3i05; 4j75; 4j76; 4jfa; 3tze; 3foc; 3jxe; 3hzr; 3a05; 3a04
					adenosine-5'-triphosphate	bound	ATP	2.50166	1	2qui	1	21	5ujj; 1r6t; 2qui; 2azx; 1r6u; 2quj; 2quh; 2ake; 2dr2; 3kt3; 3kt6; 3kt8; 3hv0; 3kt0; 4j75; 4jfa; 3tze; 3foc; 3jxe; 3a05; 3a04	29	5ujj; 1r6t; 2qui; 2azx; 1r6u; 2quj; 2quh; 1ulh; 1o5t; 2quk; 2ake; 2dr2; 5uji; 3kt3; 3kt6; 3kt8; 3hv0; 3kt0; 2ip1; 3i05; 4j75; 4j76; 4jfa; 3tze; 3foc; 3jxe; 3hzr; 3a05; 3a04
					cadmium ion	bound	CD	7.95664	1	3a05	0	21	5ujj; 1r6t; 2qui; 2azx; 1r6u; 2quj; 2quh; 2ake; 2dr2; 3kt3; 3kt6; 3kt8; 3hv0; 3kt0; 4j75; 4jfa; 3tze; 3foc; 3jxe; 3a05; 3a04	29	5ujj; 1r6t; 2qui; 2azx; 1r6u; 2quj; 2quh; 1ulh; 1o5t; 2quk; 2ake; 2dr2; 5uji; 3kt3; 3kt6; 3kt8; 3hv0; 3kt0; 2ip1; 3i05; 4j75; 4j76; 4jfa; 3tze; 3foc; 3jxe; 3hzr; 3a05; 3a04
2	MAT2A	NP_005902.1	S206F	-5.854	s-adenosylmethionine	bound	SAM	2.47307	31	8p4h; 7rwh; 7rwg; 4ndn; 7rw7; 7rw5; 4ktt; 8p1v; 7kcc; 7kcf; 8p1t; 6fbn; 7kdb; 7kda; 5a1i; 7bhx; 2p02; 8oog; 7kce; 7bhs; 7bhw; 6fcb; 7bht; 7bhr; 6g6r; 7bhv; 7bhu; 8axz; 2obv; 6vd2; 6vd1	31	55	8p4h; 7rwh; 7rwg; 4ndn; 7rw7; 7rw5; 4ktt; 8p1v; 7kcc; 7kcf; 8p1t; 4ktv; 8p1w; 7rxw; 6fbn; 6fbo; 7lnh; 7kdb; 7kda; 5a1i; 6wkb; 7bhx; 7l1a; 2p02; 7rxv; 7rxx; 8oog; 7kce; 7bhs; 7bhw; 6fcb; 7bht; 7bhr; 6p9v; 6g6r; 6fcd; 6fbp; 7bhv; 7bhu; 5a1g; 8axz; 6fwb; 5a19; 5ugh; 2obv; 1qm4; 1o92; 1o93; 1o9t; 1o90; 6vd2; 6vd1; 6vd0; 6vcy; 6vcx	59	8p4h; 7rwh; 7rwg; 4ndn; 7rw7; 7rw5; 4ktt; 8p1v; 7kcc; 7kcf; 8p1t; 4ktv; 8p1w; 7rxw; 6fbn; 6fbo; 7lnh; 7kdb; 7kda; 5a1i; 6wkb; 7bhx; 7l1a; 2p02; 7rxv; 7rxx; 8oog; 7kce; 7bhs; 7bhw; 6fcb; 7bht; 7bhr; 6p9v; 6g6r; 6fcd; 6fbp; 7bhv; 7bhu; 5a1g; 8axz; 6fwb; 6faj; 5a19; 5ugh; 6sw6; 2obv; 6sw5; 1qm4; 1o92; 1o93; 1o9t; 1o90; 6vd2; 6vd1; 6vd0; 6vcy; 6vcx; 3so4
					adenosine	bound	ADN	2.62321	7	4ktv; 6fbo; 5a1i; 6p9v; 6fcd; 6fbp; 8axz	7	55	8p4h; 7rwh; 7rwg; 4ndn; 7rw7; 7rw5; 4ktt; 8p1v; 7kcc; 7kcf; 8p1t; 4ktv; 8p1w; 7rxw; 6fbn; 6fbo; 7lnh; 7kdb; 7kda; 5a1i; 6wkb; 7bhx; 7l1a; 2p02; 7rxv; 7rxx; 8oog; 7kce; 7bhs; 7bhw; 6fcb; 7bht; 7bhr; 6p9v; 6g6r; 6fcd; 6fbp; 7bhv; 7bhu; 5a1g; 8axz; 6fwb; 5a19; 5ugh; 2obv; 1qm4; 1o92; 1o93; 1o9t; 1o90; 6vd2; 6vd1; 6vd0; 6vcy; 6vcx	59	8p4h; 7rwh; 7rwg; 4ndn; 7rw7; 7rw5; 4ktt; 8p1v; 7kcc; 7kcf; 8p1t; 4ktv; 8p1w; 7rxw; 6fbn; 6fbo; 7lnh; 7kdb; 7kda; 5a1i; 6wkb; 7bhx; 7l1a; 2p02; 7rxv; 7rxx; 8oog; 7kce; 7bhs; 7bhw; 6fcb; 7bht; 7bhr; 6p9v; 6g6r; 6fcd; 6fbp; 7bhv; 7bhu; 5a1g; 8axz; 6fwb; 6faj; 5a19; 5ugh; 6sw6; 2obv; 6sw5; 1qm4; 1o92; 1o93; 1o9t; 1o90; 6vd2; 6vd1; 6vd0; 6vcy; 6vcx; 3so4
					5'-deoxy-5'-methylthioadenosine	bound	MTA	2.74105	6	8p1w; 7rxw; 7l1a; 7rxv; 7rxx; 6vcy	6	55	8p4h; 7rwh; 7rwg; 4ndn; 7rw7; 7rw5; 4ktt; 8p1v; 7kcc; 7kcf; 8p1t; 4ktv; 8p1w; 7rxw; 6fbn; 6fbo; 7lnh; 7kdb; 7kda; 5a1i; 6wkb; 7bhx; 7l1a; 2p02; 7rxv; 7rxx; 8oog; 7kce; 7bhs; 7bhw; 6fcb; 7bht; 7bhr; 6p9v; 6g6r; 6fcd; 6fbp; 7bhv; 7bhu; 5a1g; 8axz; 6fwb; 5a19; 5ugh; 2obv; 1qm4; 1o92; 1o93; 1o9t; 1o90; 6vd2; 6vd1; 6vd0; 6vcy; 6vcx	59	8p4h; 7rwh; 7rwg; 4ndn; 7rw7; 7rw5; 4ktt; 8p1v; 7kcc; 7kcf; 8p1t; 4ktv; 8p1w; 7rxw; 6fbn; 6fbo; 7lnh; 7kdb; 7kda; 5a1i; 6wkb; 7bhx; 7l1a; 2p02; 7rxv; 7rxx; 8oog; 7kce; 7bhs; 7bhw; 6fcb; 7bht; 7bhr; 6p9v; 6g6r; 6fcd; 6fbp; 7bhv; 7bhu; 5a1g; 8axz; 6fwb; 6faj; 5a19; 5ugh; 6sw6; 2obv; 6sw5; 1qm4; 1o92; 1o93; 1o9t; 1o90; 6vd2; 6vd1; 6vd0; 6vcy; 6vcx; 3so4
					magnesium ion	bound	MG	5.15188	5	1qm4; 1o92; 1o93; 1o9t; 1o90	5	55	8p4h; 7rwh; 7rwg; 4ndn; 7rw7; 7rw5; 4ktt; 8p1v; 7kcc; 7kcf; 8p1t; 4ktv; 8p1w; 7rxw; 6fbn; 6fbo; 7lnh; 7kdb; 7kda; 5a1i; 6wkb; 7bhx; 7l1a; 2p02; 7rxv; 7rxx; 8oog; 7kce; 7bhs; 7bhw; 6fcb; 7bht; 7bhr; 6p9v; 6g6r; 6fcd; 6fbp; 7bhv; 7bhu; 5a1g; 8axz; 6fwb; 5a19; 5ugh; 2obv; 1qm4; 1o92; 1o93; 1o9t; 1o90; 6vd2; 6vd1; 6vd0; 6vcy; 6vcx	59	8p4h; 7rwh; 7rwg; 4ndn; 7rw7; 7rw5; 4ktt; 8p1v; 7kcc; 7kcf; 8p1t; 4ktv; 8p1w; 7rxw; 6fbn; 6fbo; 7lnh; 7kdb; 7kda; 5a1i; 6wkb; 7bhx; 7l1a; 2p02; 7rxv; 7rxx; 8oog; 7kce; 7bhs; 7bhw; 6fcb; 7bht; 7bhr; 6p9v; 6g6r; 6fcd; 6fbp; 7bhv; 7bhu; 5a1g; 8axz; 6fwb; 6faj; 5a19; 5ugh; 6sw6; 2obv; 6sw5; 1qm4; 1o92; 1o93; 1o9t; 1o90; 6vd2; 6vd1; 6vd0; 6vcy; 6vcx; 3so4
					phosphate ion	bound	PO4	3.27125	4	1o92; 1o93; 1o9t; 1o90	4	55	8p4h; 7rwh; 7rwg; 4ndn; 7rw7; 7rw5; 4ktt; 8p1v; 7kcc; 7kcf; 8p1t; 4ktv; 8p1w; 7rxw; 6fbn; 6fbo; 7lnh; 7kdb; 7kda; 5a1i; 6wkb; 7bhx; 7l1a; 2p02; 7rxv; 7rxx; 8oog; 7kce; 7bhs; 7bhw; 6fcb; 7bht; 7bhr; 6p9v; 6g6r; 6fcd; 6fbp; 7bhv; 7bhu; 5a1g; 8axz; 6fwb; 5a19; 5ugh; 2obv; 1qm4; 1o92; 1o93; 1o9t; 1o90; 6vd2; 6vd1; 6vd0; 6vcy; 6vcx	59	8p4h; 7rwh; 7rwg; 4ndn; 7rw7; 7rw5; 4ktt; 8p1v; 7kcc; 7kcf; 8p1t; 4ktv; 8p1w; 7rxw; 6fbn; 6fbo; 7lnh; 7kdb; 7kda; 5a1i; 6wkb; 7bhx; 7l1a; 2p02; 7rxv; 7rxx; 8oog; 7kce; 7bhs; 7bhw; 6fcb; 7bht; 7bhr; 6p9v; 6g6r; 6fcd; 6fbp; 7bhv; 7bhu; 5a1g; 8axz; 6fwb; 6faj; 5a19; 5ugh; 6sw6; 2obv; 6sw5; 1qm4; 1o92; 1o93; 1o9t; 1o90; 6vd2; 6vd1; 6vd0; 6vcy; 6vcx; 3so4
					methionine	bound	MET	5.71354	2	1o9t; 6vd0	2	55	8p4h; 7rwh; 7rwg; 4ndn; 7rw7; 7rw5; 4ktt; 8p1v; 7kcc; 7kcf; 8p1t; 4ktv; 8p1w; 7rxw; 6fbn; 6fbo; 7lnh; 7kdb; 7kda; 5a1i; 6wkb; 7bhx; 7l1a; 2p02; 7rxv; 7rxx; 8oog; 7kce; 7bhs; 7bhw; 6fcb; 7bht; 7bhr; 6p9v; 6g6r; 6fcd; 6fbp; 7bhv; 7bhu; 5a1g; 8axz; 6fwb; 5a19; 5ugh; 2obv; 1qm4; 1o92; 1o93; 1o9t; 1o90; 6vd2; 6vd1; 6vd0; 6vcy; 6vcx	59	8p4h; 7rwh; 7rwg; 4ndn; 7rw7; 7rw5; 4ktt; 8p1v; 7kcc; 7kcf; 8p1t; 4ktv; 8p1w; 7rxw; 6fbn; 6fbo; 7lnh; 7kdb; 7kda; 5a1i; 6wkb; 7bhx; 7l1a; 2p02; 7rxv; 7rxx; 8oog; 7kce; 7bhs; 7bhw; 6fcb; 7bht; 7bhr; 6p9v; 6g6r; 6fcd; 6fbp; 7bhv; 7bhu; 5a1g; 8axz; 6fwb; 6faj; 5a19; 5ugh; 6sw6; 2obv; 6sw5; 1qm4; 1o92; 1o93; 1o9t; 1o90; 6vd2; 6vd1; 6vd0; 6vcy; 6vcx; 3so4
					(2s,4s)-2-amino-4,5-epoxipentanoic acid	bound	LIS	3.78625	2	1o93; 1o90	2	55	8p4h; 7rwh; 7rwg; 4ndn; 7rw7; 7rw5; 4ktt; 8p1v; 7kcc; 7kcf; 8p1t; 4ktv; 8p1w; 7rxw; 6fbn; 6fbo; 7lnh; 7kdb; 7kda; 5a1i; 6wkb; 7bhx; 7l1a; 2p02; 7rxv; 7rxx; 8oog; 7kce; 7bhs; 7bhw; 6fcb; 7bht; 7bhr; 6p9v; 6g6r; 6fcd; 6fbp; 7bhv; 7bhu; 5a1g; 8axz; 6fwb; 5a19; 5ugh; 2obv; 1qm4; 1o92; 1o93; 1o9t; 1o90; 6vd2; 6vd1; 6vd0; 6vcy; 6vcx	59	8p4h; 7rwh; 7rwg; 4ndn; 7rw7; 7rw5; 4ktt; 8p1v; 7kcc; 7kcf; 8p1t; 4ktv; 8p1w; 7rxw; 6fbn; 6fbo; 7lnh; 7kdb; 7kda; 5a1i; 6wkb; 7bhx; 7l1a; 2p02; 7rxv; 7rxx; 8oog; 7kce; 7bhs; 7bhw; 6fcb; 7bht; 7bhr; 6p9v; 6g6r; 6fcd; 6fbp; 7bhv; 7bhu; 5a1g; 8axz; 6fwb; 6faj; 5a19; 5ugh; 6sw6; 2obv; 6sw5; 1qm4; 1o92; 1o93; 1o9t; 1o90; 6vd2; 6vd1; 6vd0; 6vcy; 6vcx; 3so4
					adenosine-5'-triphosphate	bound	ATP	6.70801	2	1o93; 1o9t	2	55	8p4h; 7rwh; 7rwg; 4ndn; 7rw7; 7rw5; 4ktt; 8p1v; 7kcc; 7kcf; 8p1t; 4ktv; 8p1w; 7rxw; 6fbn; 6fbo; 7lnh; 7kdb; 7kda; 5a1i; 6wkb; 7bhx; 7l1a; 2p02; 7rxv; 7rxx; 8oog; 7kce; 7bhs; 7bhw; 6fcb; 7bht; 7bhr; 6p9v; 6g6r; 6fcd; 6fbp; 7bhv; 7bhu; 5a1g; 8axz; 6fwb; 5a19; 5ugh; 2obv; 1qm4; 1o92; 1o93; 1o9t; 1o90; 6vd2; 6vd1; 6vd0; 6vcy; 6vcx	59	8p4h; 7rwh; 7rwg; 4ndn; 7rw7; 7rw5; 4ktt; 8p1v; 7kcc; 7kcf; 8p1t; 4ktv; 8p1w; 7rxw; 6fbn; 6fbo; 7lnh; 7kdb; 7kda; 5a1i; 6wkb; 7bhx; 7l1a; 2p02; 7rxv; 7rxx; 8oog; 7kce; 7bhs; 7bhw; 6fcb; 7bht; 7bhr; 6p9v; 6g6r; 6fcd; 6fbp; 7bhv; 7bhu; 5a1g; 8axz; 6fwb; 6faj; 5a19; 5ugh; 6sw6; 2obv; 6sw5; 1qm4; 1o92; 1o93; 1o9t; 1o90; 6vd2; 6vd1; 6vd0; 6vcy; 6vcx; 3so4
					l-2-amino-4-methoxy-cis-but-3-enoic acid	bound	AMB	4.96744	2	1qm4; 1o92	2	55	8p4h; 7rwh; 7rwg; 4ndn; 7rw7; 7rw5; 4ktt; 8p1v; 7kcc; 7kcf; 8p1t; 4ktv; 8p1w; 7rxw; 6fbn; 6fbo; 7lnh; 7kdb; 7kda; 5a1i; 6wkb; 7bhx; 7l1a; 2p02; 7rxv; 7rxx; 8oog; 7kce; 7bhs; 7bhw; 6fcb; 7bht; 7bhr; 6p9v; 6g6r; 6fcd; 6fbp; 7bhv; 7bhu; 5a1g; 8axz; 6fwb; 5a19; 5ugh; 2obv; 1qm4; 1o92; 1o93; 1o9t; 1o90; 6vd2; 6vd1; 6vd0; 6vcy; 6vcx	59	8p4h; 7rwh; 7rwg; 4ndn; 7rw7; 7rw5; 4ktt; 8p1v; 7kcc; 7kcf; 8p1t; 4ktv; 8p1w; 7rxw; 6fbn; 6fbo; 7lnh; 7kdb; 7kda; 5a1i; 6wkb; 7bhx; 7l1a; 2p02; 7rxv; 7rxx; 8oog; 7kce; 7bhs; 7bhw; 6fcb; 7bht; 7bhr; 6p9v; 6g6r; 6fcd; 6fbp; 7bhv; 7bhu; 5a1g; 8axz; 6fwb; 6faj; 5a19; 5ugh; 6sw6; 2obv; 6sw5; 1qm4; 1o92; 1o93; 1o9t; 1o90; 6vd2; 6vd1; 6vd0; 6vcy; 6vcx; 3so4
					sulfate ion	bound	SO4	3.76676	2	6fwb; 1qm4	2	55	8p4h; 7rwh; 7rwg; 4ndn; 7rw7; 7rw5; 4ktt; 8p1v; 7kcc; 7kcf; 8p1t; 4ktv; 8p1w; 7rxw; 6fbn; 6fbo; 7lnh; 7kdb; 7kda; 5a1i; 6wkb; 7bhx; 7l1a; 2p02; 7rxv; 7rxx; 8oog; 7kce; 7bhs; 7bhw; 6fcb; 7bht; 7bhr; 6p9v; 6g6r; 6fcd; 6fbp; 7bhv; 7bhu; 5a1g; 8axz; 6fwb; 5a19; 5ugh; 2obv; 1qm4; 1o92; 1o93; 1o9t; 1o90; 6vd2; 6vd1; 6vd0; 6vcy; 6vcx	59	8p4h; 7rwh; 7rwg; 4ndn; 7rw7; 7rw5; 4ktt; 8p1v; 7kcc; 7kcf; 8p1t; 4ktv; 8p1w; 7rxw; 6fbn; 6fbo; 7lnh; 7kdb; 7kda; 5a1i; 6wkb; 7bhx; 7l1a; 2p02; 7rxv; 7rxx; 8oog; 7kce; 7bhs; 7bhw; 6fcb; 7bht; 7bhr; 6p9v; 6g6r; 6fcd; 6fbp; 7bhv; 7bhu; 5a1g; 8axz; 6fwb; 6faj; 5a19; 5ugh; 6sw6; 2obv; 6sw5; 1qm4; 1o92; 1o93; 1o9t; 1o90; 6vd2; 6vd1; 6vd0; 6vcy; 6vcx; 3so4
					diphosphomethylphosphonic acid adenosyl ester	bound	APC	3.86901	1	6vd0	1	55	8p4h; 7rwh; 7rwg; 4ndn; 7rw7; 7rw5; 4ktt; 8p1v; 7kcc; 7kcf; 8p1t; 4ktv; 8p1w; 7rxw; 6fbn; 6fbo; 7lnh; 7kdb; 7kda; 5a1i; 6wkb; 7bhx; 7l1a; 2p02; 7rxv; 7rxx; 8oog; 7kce; 7bhs; 7bhw; 6fcb; 7bht; 7bhr; 6p9v; 6g6r; 6fcd; 6fbp; 7bhv; 7bhu; 5a1g; 8axz; 6fwb; 5a19; 5ugh; 2obv; 1qm4; 1o92; 1o93; 1o9t; 1o90; 6vd2; 6vd1; 6vd0; 6vcy; 6vcx	59	8p4h; 7rwh; 7rwg; 4ndn; 7rw7; 7rw5; 4ktt; 8p1v; 7kcc; 7kcf; 8p1t; 4ktv; 8p1w; 7rxw; 6fbn; 6fbo; 7lnh; 7kdb; 7kda; 5a1i; 6wkb; 7bhx; 7l1a; 2p02; 7rxv; 7rxx; 8oog; 7kce; 7bhs; 7bhw; 6fcb; 7bht; 7bhr; 6p9v; 6g6r; 6fcd; 6fbp; 7bhv; 7bhu; 5a1g; 8axz; 6fwb; 6faj; 5a19; 5ugh; 6sw6; 2obv; 6sw5; 1qm4; 1o92; 1o93; 1o9t; 1o90; 6vd2; 6vd1; 6vd0; 6vcy; 6vcx; 3so4
					(2~{s})-2-azanyl-4-[[(2~{s},3~{s},4~{r},5~{r})-5-[2,4-bis(oxidanylidene)pyrimidin-1-yl]-3,4-bis(oxidanyl)oxolan-2-yl]methyl-methyl-$l^{3}-sulfanyl]butanoic acid	bound	YQP	4.19384	1	7lnh	1	55	8p4h; 7rwh; 7rwg; 4ndn; 7rw7; 7rw5; 4ktt; 8p1v; 7kcc; 7kcf; 8p1t; 4ktv; 8p1w; 7rxw; 6fbn; 6fbo; 7lnh; 7kdb; 7kda; 5a1i; 6wkb; 7bhx; 7l1a; 2p02; 7rxv; 7rxx; 8oog; 7kce; 7bhs; 7bhw; 6fcb; 7bht; 7bhr; 6p9v; 6g6r; 6fcd; 6fbp; 7bhv; 7bhu; 5a1g; 8axz; 6fwb; 5a19; 5ugh; 2obv; 1qm4; 1o92; 1o93; 1o9t; 1o90; 6vd2; 6vd1; 6vd0; 6vcy; 6vcx	59	8p4h; 7rwh; 7rwg; 4ndn; 7rw7; 7rw5; 4ktt; 8p1v; 7kcc; 7kcf; 8p1t; 4ktv; 8p1w; 7rxw; 6fbn; 6fbo; 7lnh; 7kdb; 7kda; 5a1i; 6wkb; 7bhx; 7l1a; 2p02; 7rxv; 7rxx; 8oog; 7kce; 7bhs; 7bhw; 6fcb; 7bht; 7bhr; 6p9v; 6g6r; 6fcd; 6fbp; 7bhv; 7bhu; 5a1g; 8axz; 6fwb; 6faj; 5a19; 5ugh; 6sw6; 2obv; 6sw5; 1qm4; 1o92; 1o93; 1o9t; 1o90; 6vd2; 6vd1; 6vd0; 6vcy; 6vcx; 3so4
					5'-deoxyuridine	bound	U4P	4.24214	1	6wkb	1	55	8p4h; 7rwh; 7rwg; 4ndn; 7rw7; 7rw5; 4ktt; 8p1v; 7kcc; 7kcf; 8p1t; 4ktv; 8p1w; 7rxw; 6fbn; 6fbo; 7lnh; 7kdb; 7kda; 5a1i; 6wkb; 7bhx; 7l1a; 2p02; 7rxv; 7rxx; 8oog; 7kce; 7bhs; 7bhw; 6fcb; 7bht; 7bhr; 6p9v; 6g6r; 6fcd; 6fbp; 7bhv; 7bhu; 5a1g; 8axz; 6fwb; 5a19; 5ugh; 2obv; 1qm4; 1o92; 1o93; 1o9t; 1o90; 6vd2; 6vd1; 6vd0; 6vcy; 6vcx	59	8p4h; 7rwh; 7rwg; 4ndn; 7rw7; 7rw5; 4ktt; 8p1v; 7kcc; 7kcf; 8p1t; 4ktv; 8p1w; 7rxw; 6fbn; 6fbo; 7lnh; 7kdb; 7kda; 5a1i; 6wkb; 7bhx; 7l1a; 2p02; 7rxv; 7rxx; 8oog; 7kce; 7bhs; 7bhw; 6fcb; 7bht; 7bhr; 6p9v; 6g6r; 6fcd; 6fbp; 7bhv; 7bhu; 5a1g; 8axz; 6fwb; 6faj; 5a19; 5ugh; 6sw6; 2obv; 6sw5; 1qm4; 1o92; 1o93; 1o9t; 1o90; 6vd2; 6vd1; 6vd0; 6vcy; 6vcx; 3so4
					[(3s)-3-amino-3-carboxypropyl]{[(2s,3s,4r,5r)-5-(6-amino-9h-purin-9-yl)-3,4-dihydroxytetrahydrofuran-2-yl]methyl}ethylsulfonium	bound	S7M	3.96262	1	5a1g	1	55	8p4h; 7rwh; 7rwg; 4ndn; 7rw7; 7rw5; 4ktt; 8p1v; 7kcc; 7kcf; 8p1t; 4ktv; 8p1w; 7rxw; 6fbn; 6fbo; 7lnh; 7kdb; 7kda; 5a1i; 6wkb; 7bhx; 7l1a; 2p02; 7rxv; 7rxx; 8oog; 7kce; 7bhs; 7bhw; 6fcb; 7bht; 7bhr; 6p9v; 6g6r; 6fcd; 6fbp; 7bhv; 7bhu; 5a1g; 8axz; 6fwb; 5a19; 5ugh; 2obv; 1qm4; 1o92; 1o93; 1o9t; 1o90; 6vd2; 6vd1; 6vd0; 6vcy; 6vcx	59	8p4h; 7rwh; 7rwg; 4ndn; 7rw7; 7rw5; 4ktt; 8p1v; 7kcc; 7kcf; 8p1t; 4ktv; 8p1w; 7rxw; 6fbn; 6fbo; 7lnh; 7kdb; 7kda; 5a1i; 6wkb; 7bhx; 7l1a; 2p02; 7rxv; 7rxx; 8oog; 7kce; 7bhs; 7bhw; 6fcb; 7bht; 7bhr; 6p9v; 6g6r; 6fcd; 6fbp; 7bhv; 7bhu; 5a1g; 8axz; 6fwb; 6faj; 5a19; 5ugh; 6sw6; 2obv; 6sw5; 1qm4; 1o92; 1o93; 1o9t; 1o90; 6vd2; 6vd1; 6vd0; 6vcy; 6vcx; 3so4
5	KCNN2	NP_001359162.1	I637F	-5.846	potassium ion	bound	K	2.73138	2	6cnm; 6cnn	2	3	6cnm; 6cnn; 6cno	3	6cnm; 6cnn; 6cno
20	ZMYND8	NP_001350643.1	R333G	-5.822	zinc ion	bound	ZN	5.49969	2	4cos; 5y1z	2	3	4cos; 5b73; 5y1z	3	4cos; 5b73; 5y1z
					drebrin	polypeptide(L)		6.57698	1	5y1z	1	3	4cos; 5b73; 5y1z	3	4cos; 5b73; 5y1z
			W1082C	-5.639	zinc ion	bound	ZN	4.85362	1	5mq4	1	1	5mq4	1	5mq4
15	ACTC1	NP_005150.1	S340F	-5.816	adenosine-5'-diphosphate	bound	ADP	6.02412	11	8dmy; 4a7f; 6c1g; 6kn8; 4a7h; 4a7l; 4a7n; 6kn7; 3g37; 2y83; 3mfp	11	20	8dmy; 4a7f; 6c1g; 7ko5; 7ko7; 7tj7; 6kn8; 7tit; 4a7h; 4a7l; 7ko4; 7tij; 7kon; 7kor; 4a7n; 6kn7; 3g37; 8syf; 2y83; 3mfp	22	8dmy; 4a7f; 6c1g; 7ko5; 7ko7; 7tj7; 6kn8; 7tit; 4a7h; 4a7l; 7ko4; 7tij; 7kon; 7kor; 4a7n; 3j8k; 3b5u; 6kn7; 3g37; 8syf; 2y83; 3mfp
					troponin i, cardiac muscle	polypeptide(L)		5.42328	4	7ko7; 7ko4; 7kon; 6kn7	4	20	8dmy; 4a7f; 6c1g; 7ko5; 7ko7; 7tj7; 6kn8; 7tit; 4a7h; 4a7l; 7ko4; 7tij; 7kon; 7kor; 4a7n; 6kn7; 3g37; 8syf; 2y83; 3mfp	22	8dmy; 4a7f; 6c1g; 7ko5; 7ko7; 7tj7; 6kn8; 7tit; 4a7h; 4a7l; 7ko4; 7tij; 7kon; 7kor; 4a7n; 3j8k; 3b5u; 6kn7; 3g37; 8syf; 2y83; 3mfp
					myosin-binding protein c, cardiac-type	polypeptide(L)		4.71863	3	7tj7; 7tit; 7tij	3	20	8dmy; 4a7f; 6c1g; 7ko5; 7ko7; 7tj7; 6kn8; 7tit; 4a7h; 4a7l; 7ko4; 7tij; 7kon; 7kor; 4a7n; 6kn7; 3g37; 8syf; 2y83; 3mfp	22	8dmy; 4a7f; 6c1g; 7ko5; 7ko7; 7tj7; 6kn8; 7tit; 4a7h; 4a7l; 7ko4; 7tij; 7kon; 7kor; 4a7n; 3j8k; 3b5u; 6kn7; 3g37; 8syf; 2y83; 3mfp
					magnesium ion	bound	MG	7.04958	2	6c1g; 3g37	2	20	8dmy; 4a7f; 6c1g; 7ko5; 7ko7; 7tj7; 6kn8; 7tit; 4a7h; 4a7l; 7ko4; 7tij; 7kon; 7kor; 4a7n; 6kn7; 3g37; 8syf; 2y83; 3mfp	22	8dmy; 4a7f; 6c1g; 7ko5; 7ko7; 7tj7; 6kn8; 7tit; 4a7h; 4a7l; 7ko4; 7tij; 7kon; 7kor; 4a7n; 3j8k; 3b5u; 6kn7; 3g37; 8syf; 2y83; 3mfp
					calcium ion	bound	CA	6.49298	2	4a7l; 2y83	2	20	8dmy; 4a7f; 6c1g; 7ko5; 7ko7; 7tj7; 6kn8; 7tit; 4a7h; 4a7l; 7ko4; 7tij; 7kon; 7kor; 4a7n; 6kn7; 3g37; 8syf; 2y83; 3mfp	22	8dmy; 4a7f; 6c1g; 7ko5; 7ko7; 7tj7; 6kn8; 7tit; 4a7h; 4a7l; 7ko4; 7tij; 7kon; 7kor; 4a7n; 3j8k; 3b5u; 6kn7; 3g37; 8syf; 2y83; 3mfp
					myosin heavy chain 11	polypeptide(L)		6.68564	1	8syf	1	20	8dmy; 4a7f; 6c1g; 7ko5; 7ko7; 7tj7; 6kn8; 7tit; 4a7h; 4a7l; 7ko4; 7tij; 7kon; 7kor; 4a7n; 6kn7; 3g37; 8syf; 2y83; 3mfp	22	8dmy; 4a7f; 6c1g; 7ko5; 7ko7; 7tj7; 6kn8; 7tit; 4a7h; 4a7l; 7ko4; 7tij; 7kon; 7kor; 4a7n; 3j8k; 3b5u; 6kn7; 3g37; 8syf; 2y83; 3mfp
					myosin ie heavy chain	polypeptide(L)		7.80813	1	4a7l	1	20	8dmy; 4a7f; 6c1g; 7ko5; 7ko7; 7tj7; 6kn8; 7tit; 4a7h; 4a7l; 7ko4; 7tij; 7kon; 7kor; 4a7n; 6kn7; 3g37; 8syf; 2y83; 3mfp	22	8dmy; 4a7f; 6c1g; 7ko5; 7ko7; 7tj7; 6kn8; 7tit; 4a7h; 4a7l; 7ko4; 7tij; 7kon; 7kor; 4a7n; 3j8k; 3b5u; 6kn7; 3g37; 8syf; 2y83; 3mfp
					troponin t, cardiac muscle	polypeptide(L)		7.20551	1	6kn7	1	20	8dmy; 4a7f; 6c1g; 7ko5; 7ko7; 7tj7; 6kn8; 7tit; 4a7h; 4a7l; 7ko4; 7tij; 7kon; 7kor; 4a7n; 6kn7; 3g37; 8syf; 2y83; 3mfp	22	8dmy; 4a7f; 6c1g; 7ko5; 7ko7; 7tj7; 6kn8; 7tit; 4a7h; 4a7l; 7ko4; 7tij; 7kon; 7kor; 4a7n; 3j8k; 3b5u; 6kn7; 3g37; 8syf; 2y83; 3mfp
					unconventional myosin-ib	polypeptide(L)		7.46313	1	6c1g	1	20	8dmy; 4a7f; 6c1g; 7ko5; 7ko7; 7tj7; 6kn8; 7tit; 4a7h; 4a7l; 7ko4; 7tij; 7kon; 7kor; 4a7n; 6kn7; 3g37; 8syf; 2y83; 3mfp	22	8dmy; 4a7f; 6c1g; 7ko5; 7ko7; 7tj7; 6kn8; 7tit; 4a7h; 4a7l; 7ko4; 7tij; 7kon; 7kor; 4a7n; 3j8k; 3b5u; 6kn7; 3g37; 8syf; 2y83; 3mfp
7	PSMA2	NP_002778.1	G125D	-5.8	proteasome subunit alpha type-6	polypeptide(L)		4.36654	60	8cvt; 5ln3; 6epe; 6epd; 6epf; 6epc; 4r67; 8fz6; 5l4g; 4r3o; 1iru; 8fz5; 5gjq; 5t0g; 5t0i; 3une; 7w3b; 7w3c; 7w3f; 7w39; 7w3i; 6msd; 5vfs; 5vfr; 7w3h; 7w37; 6wjn; 7qy7; 6wjd; 7qxn; 7qxx; 7w3a; 5vft; 7w3m; 7w3g; 7qyb; 7w3k; 7w3j; 6msk; 7w38; 7qya; 5t0c; 5vfo; 5t0h; 7qxp; 6msj; 5vfu; 6msb; 6mse; 6msg; 6msh; 5t0j; 7qxw; 7qxu; 5vfq; 5vfp; 7dr7; 5gjr; 7nht; 3unb	61	60	8cvt; 5ln3; 6epe; 6epd; 6epf; 6epc; 4r67; 8fz6; 5l4g; 4r3o; 1iru; 8fz5; 5gjq; 5t0g; 5t0i; 3une; 7w3b; 7w3c; 7w3f; 7w39; 7w3i; 6msd; 5vfs; 5vfr; 7w3h; 7w37; 6wjn; 7qy7; 6wjd; 7qxn; 7qxx; 7w3a; 5vft; 7w3m; 7w3g; 7qyb; 7w3k; 7w3j; 6msk; 7w38; 7qya; 5t0c; 5vfo; 5t0h; 7qxp; 6msj; 5vfu; 6msb; 6mse; 6msg; 6msh; 5t0j; 7qxw; 7qxu; 5vfq; 5vfp; 7dr7; 5gjr; 7nht; 3unb	60	8cvt; 5ln3; 6epe; 6epd; 6epf; 6epc; 4r67; 8fz6; 5l4g; 4r3o; 1iru; 8fz5; 5gjq; 5t0g; 5t0i; 3une; 7w3b; 7w3c; 7w3f; 7w39; 7w3i; 6msd; 5vfs; 5vfr; 7w3h; 7w37; 6wjn; 7qy7; 6wjd; 7qxn; 7qxx; 7w3a; 5vft; 7w3m; 7w3g; 7qyb; 7w3k; 7w3j; 6msk; 7w38; 7qya; 5t0c; 5vfo; 5t0h; 7qxp; 6msj; 5vfu; 6msb; 6mse; 6msg; 6msh; 5t0j; 7qxw; 7qxu; 5vfq; 5vfp; 7dr7; 5gjr; 7nht; 3unb
					proteasome subunit alpha type-4	polypeptide(L)		2.9175	60	8cvt; 5ln3; 6epe; 6epd; 6epf; 6epc; 4r67; 8fz6; 5l4g; 4r3o; 1iru; 8fz5; 5gjq; 5t0g; 5t0i; 3une; 7w3b; 7w3c; 7w3f; 7w39; 7w3i; 6msd; 5vfs; 5vfr; 7w3h; 7w37; 6wjn; 7qy7; 6wjd; 7qxn; 7qxx; 7w3a; 5vft; 7w3m; 7w3g; 7qyb; 7w3k; 7w3j; 6msk; 7w38; 7qya; 5t0c; 5vfo; 5t0h; 7qxp; 6msj; 5vfu; 6msb; 6mse; 6msg; 6msh; 5t0j; 7qxw; 7qxu; 5vfq; 5vfp; 7dr7; 5gjr; 7nht; 3unb	60	60	8cvt; 5ln3; 6epe; 6epd; 6epf; 6epc; 4r67; 8fz6; 5l4g; 4r3o; 1iru; 8fz5; 5gjq; 5t0g; 5t0i; 3une; 7w3b; 7w3c; 7w3f; 7w39; 7w3i; 6msd; 5vfs; 5vfr; 7w3h; 7w37; 6wjn; 7qy7; 6wjd; 7qxn; 7qxx; 7w3a; 5vft; 7w3m; 7w3g; 7qyb; 7w3k; 7w3j; 6msk; 7w38; 7qya; 5t0c; 5vfo; 5t0h; 7qxp; 6msj; 5vfu; 6msb; 6mse; 6msg; 6msh; 5t0j; 7qxw; 7qxu; 5vfq; 5vfp; 7dr7; 5gjr; 7nht; 3unb	60	8cvt; 5ln3; 6epe; 6epd; 6epf; 6epc; 4r67; 8fz6; 5l4g; 4r3o; 1iru; 8fz5; 5gjq; 5t0g; 5t0i; 3une; 7w3b; 7w3c; 7w3f; 7w39; 7w3i; 6msd; 5vfs; 5vfr; 7w3h; 7w37; 6wjn; 7qy7; 6wjd; 7qxn; 7qxx; 7w3a; 5vft; 7w3m; 7w3g; 7qyb; 7w3k; 7w3j; 6msk; 7w38; 7qya; 5t0c; 5vfo; 5t0h; 7qxp; 6msj; 5vfu; 6msb; 6mse; 6msg; 6msh; 5t0j; 7qxw; 7qxu; 5vfq; 5vfp; 7dr7; 5gjr; 7nht; 3unb
					proteasome subunit alpha type-7	polypeptide(L)		5.02916	25	6epd; 6epf; 6epc; 8fz6; 5l4g; 8fz5; 5gjq; 5t0g; 3une; 5vfs; 5vfr; 5vft; 5t0c; 5vfo; 5t0h; 7qxp; 5vfu; 6mse; 6msg; 6msh; 7qxw; 5vfq; 5vfp; 7dr7; 3unb	25	60	8cvt; 5ln3; 6epe; 6epd; 6epf; 6epc; 4r67; 8fz6; 5l4g; 4r3o; 1iru; 8fz5; 5gjq; 5t0g; 5t0i; 3une; 7w3b; 7w3c; 7w3f; 7w39; 7w3i; 6msd; 5vfs; 5vfr; 7w3h; 7w37; 6wjn; 7qy7; 6wjd; 7qxn; 7qxx; 7w3a; 5vft; 7w3m; 7w3g; 7qyb; 7w3k; 7w3j; 6msk; 7w38; 7qya; 5t0c; 5vfo; 5t0h; 7qxp; 6msj; 5vfu; 6msb; 6mse; 6msg; 6msh; 5t0j; 7qxw; 7qxu; 5vfq; 5vfp; 7dr7; 5gjr; 7nht; 3unb	60	8cvt; 5ln3; 6epe; 6epd; 6epf; 6epc; 4r67; 8fz6; 5l4g; 4r3o; 1iru; 8fz5; 5gjq; 5t0g; 5t0i; 3une; 7w3b; 7w3c; 7w3f; 7w39; 7w3i; 6msd; 5vfs; 5vfr; 7w3h; 7w37; 6wjn; 7qy7; 6wjd; 7qxn; 7qxx; 7w3a; 5vft; 7w3m; 7w3g; 7qyb; 7w3k; 7w3j; 6msk; 7w38; 7qya; 5t0c; 5vfo; 5t0h; 7qxp; 6msj; 5vfu; 6msb; 6mse; 6msg; 6msh; 5t0j; 7qxw; 7qxu; 5vfq; 5vfp; 7dr7; 5gjr; 7nht; 3unb
					substrate	polypeptide(L)		7.56533	1	7w3h	1	60	8cvt; 5ln3; 6epe; 6epd; 6epf; 6epc; 4r67; 8fz6; 5l4g; 4r3o; 1iru; 8fz5; 5gjq; 5t0g; 5t0i; 3une; 7w3b; 7w3c; 7w3f; 7w39; 7w3i; 6msd; 5vfs; 5vfr; 7w3h; 7w37; 6wjn; 7qy7; 6wjd; 7qxn; 7qxx; 7w3a; 5vft; 7w3m; 7w3g; 7qyb; 7w3k; 7w3j; 6msk; 7w38; 7qya; 5t0c; 5vfo; 5t0h; 7qxp; 6msj; 5vfu; 6msb; 6mse; 6msg; 6msh; 5t0j; 7qxw; 7qxu; 5vfq; 5vfp; 7dr7; 5gjr; 7nht; 3unb	60	8cvt; 5ln3; 6epe; 6epd; 6epf; 6epc; 4r67; 8fz6; 5l4g; 4r3o; 1iru; 8fz5; 5gjq; 5t0g; 5t0i; 3une; 7w3b; 7w3c; 7w3f; 7w39; 7w3i; 6msd; 5vfs; 5vfr; 7w3h; 7w37; 6wjn; 7qy7; 6wjd; 7qxn; 7qxx; 7w3a; 5vft; 7w3m; 7w3g; 7qyb; 7w3k; 7w3j; 6msk; 7w38; 7qya; 5t0c; 5vfo; 5t0h; 7qxp; 6msj; 5vfu; 6msb; 6mse; 6msg; 6msh; 5t0j; 7qxw; 7qxu; 5vfq; 5vfp; 7dr7; 5gjr; 7nht; 3unb
17	MAP2K4	NP_001268364.1	S262N	-5.797	serine/threonine-protein kinase b-raf	polypeptide(L)		6.41154	9	8dgt; 6pp9; 6v2w; 7m0v; 7m0w; 7m0z; 7m0x; 6u2g; 7m0y	9	70	3alo; 3aln; 3vn9; 8a8m; 3enm; 8p7j; 6yg1; 6ib0; 6yg2; 6yz4; 5b2l; 7ovn; 6qg7; 7ovm; 7cbx; 6yg7; 7ovl; 5z1e; 6qft; 6qhr; 5z1d; 6yg3; 6qho; 6qg4; 6yg5; 6yg4; 1s9i; 3w8q; 5bx0; 8dgt; 3eqd; 3eqi; 3zls; 7m0u; 3eqh; 3eqg; 3eqf; 6pp9; 6v2w; 7m0v; 7m0w; 7m0z; 7m0x; 8dgs; 6u2g; 7m0t; 7juy; 7juw; 5yt3; 7m0y; 3zlw; 3eqc; 3zlx; 2y4i; 5kkr; 3zly; 6q0t; 6q0j; 7xlp; 3zm4; 7pqv; 7jux; 7juz; 7jv1; 7jv0; 7xnc; 5hz…	77	3alo; 3aln; 3vut; 3vn9; 8a8m; 3enm; 8p7j; 6yg1; 6yfz; 6ib0; 5y90; 6yg2; 6yz4; 6qfl; 5b2l; 7ovn; 6qg7; 7ovm; 7cbx; 6yg0; 6yg7; 7ovl; 5z1e; 6qft; 6qhr; 5z1d; 2dyl; 6qfr; 6yg3; 6qho; 6qg4; 6yg5; 6yg4; 1s9i; 3w8q; 5bx0; 8dgt; 3eqd; 3eqi; 3zls; 7m0u; 3eqh; 3eqg; 3eqf; 6pp9; 6v2w; 7m0v; 7m0w; 7m0z; 7m0x; 8dgs; 6u2g; 7m0t; 7juy; 7juw; 5yt3; 7m0y; 3zlw; 3eqc; 3zlx; 2y4i; 5kkr; 3zly; 6q0t; 6q0j; 7xlp; 3zm…
					5-[(2-fluoro-4-iodophenyl)amino]-n-(2-hydroxyethoxy)imidazo[1,5-a]pyridine-6-carboxamide	bound	LCJ	2.9005	5	8dgt; 6pp9; 8dgs; 6q0t; 6q0j	5	70	3alo; 3aln; 3vn9; 8a8m; 3enm; 8p7j; 6yg1; 6ib0; 6yg2; 6yz4; 5b2l; 7ovn; 6qg7; 7ovm; 7cbx; 6yg7; 7ovl; 5z1e; 6qft; 6qhr; 5z1d; 6yg3; 6qho; 6qg4; 6yg5; 6yg4; 1s9i; 3w8q; 5bx0; 8dgt; 3eqd; 3eqi; 3zls; 7m0u; 3eqh; 3eqg; 3eqf; 6pp9; 6v2w; 7m0v; 7m0w; 7m0z; 7m0x; 8dgs; 6u2g; 7m0t; 7juy; 7juw; 5yt3; 7m0y; 3zlw; 3eqc; 3zlx; 2y4i; 5kkr; 3zly; 6q0t; 6q0j; 7xlp; 3zm4; 7pqv; 7jux; 7juz; 7jv1; 7jv0; 7xnc; 5hz…	77	3alo; 3aln; 3vut; 3vn9; 8a8m; 3enm; 8p7j; 6yg1; 6yfz; 6ib0; 5y90; 6yg2; 6yz4; 6qfl; 5b2l; 7ovn; 6qg7; 7ovm; 7cbx; 6yg0; 6yg7; 7ovl; 5z1e; 6qft; 6qhr; 5z1d; 2dyl; 6qfr; 6yg3; 6qho; 6qg4; 6yg5; 6yg4; 1s9i; 3w8q; 5bx0; 8dgt; 3eqd; 3eqi; 3zls; 7m0u; 3eqh; 3eqg; 3eqf; 6pp9; 6v2w; 7m0v; 7m0w; 7m0z; 7m0x; 8dgs; 6u2g; 7m0t; 7juy; 7juw; 5yt3; 7m0y; 3zlw; 3eqc; 3zlx; 2y4i; 5kkr; 3zly; 6q0t; 6q0j; 7xlp; 3zm…
					magnesium ion	bound	MG	5.98435	4	3alo; 3aln; 3vn9; 8a8m	4	70	3alo; 3aln; 3vn9; 8a8m; 3enm; 8p7j; 6yg1; 6ib0; 6yg2; 6yz4; 5b2l; 7ovn; 6qg7; 7ovm; 7cbx; 6yg7; 7ovl; 5z1e; 6qft; 6qhr; 5z1d; 6yg3; 6qho; 6qg4; 6yg5; 6yg4; 1s9i; 3w8q; 5bx0; 8dgt; 3eqd; 3eqi; 3zls; 7m0u; 3eqh; 3eqg; 3eqf; 6pp9; 6v2w; 7m0v; 7m0w; 7m0z; 7m0x; 8dgs; 6u2g; 7m0t; 7juy; 7juw; 5yt3; 7m0y; 3zlw; 3eqc; 3zlx; 2y4i; 5kkr; 3zly; 6q0t; 6q0j; 7xlp; 3zm4; 7pqv; 7jux; 7juz; 7jv1; 7jv0; 7xnc; 5hz…	77	3alo; 3aln; 3vut; 3vn9; 8a8m; 3enm; 8p7j; 6yg1; 6yfz; 6ib0; 5y90; 6yg2; 6yz4; 6qfl; 5b2l; 7ovn; 6qg7; 7ovm; 7cbx; 6yg0; 6yg7; 7ovl; 5z1e; 6qft; 6qhr; 5z1d; 2dyl; 6qfr; 6yg3; 6qho; 6qg4; 6yg5; 6yg4; 1s9i; 3w8q; 5bx0; 8dgt; 3eqd; 3eqi; 3zls; 7m0u; 3eqh; 3eqg; 3eqf; 6pp9; 6v2w; 7m0v; 7m0w; 7m0z; 7m0x; 8dgs; 6u2g; 7m0t; 7juy; 7juw; 5yt3; 7m0y; 3zlw; 3eqc; 3zlx; 2y4i; 5kkr; 3zly; 6q0t; 6q0j; 7xlp; 3zm…
					n-{[(2r)-2,3-dihydroxypropyl]oxy}-3,4-difluoro-2-[(2-fluoro-4-iodophenyl)amino]benzamide	bound	4BM	2.7823	4	3eqg; 7m0x; 7jv0; 7juu	4	70	3alo; 3aln; 3vn9; 8a8m; 3enm; 8p7j; 6yg1; 6ib0; 6yg2; 6yz4; 5b2l; 7ovn; 6qg7; 7ovm; 7cbx; 6yg7; 7ovl; 5z1e; 6qft; 6qhr; 5z1d; 6yg3; 6qho; 6qg4; 6yg5; 6yg4; 1s9i; 3w8q; 5bx0; 8dgt; 3eqd; 3eqi; 3zls; 7m0u; 3eqh; 3eqg; 3eqf; 6pp9; 6v2w; 7m0v; 7m0w; 7m0z; 7m0x; 8dgs; 6u2g; 7m0t; 7juy; 7juw; 5yt3; 7m0y; 3zlw; 3eqc; 3zlx; 2y4i; 5kkr; 3zly; 6q0t; 6q0j; 7xlp; 3zm4; 7pqv; 7jux; 7juz; 7jv1; 7jv0; 7xnc; 5hz…	77	3alo; 3aln; 3vut; 3vn9; 8a8m; 3enm; 8p7j; 6yg1; 6yfz; 6ib0; 5y90; 6yg2; 6yz4; 6qfl; 5b2l; 7ovn; 6qg7; 7ovm; 7cbx; 6yg0; 6yg7; 7ovl; 5z1e; 6qft; 6qhr; 5z1d; 2dyl; 6qfr; 6yg3; 6qho; 6qg4; 6yg5; 6yg4; 1s9i; 3w8q; 5bx0; 8dgt; 3eqd; 3eqi; 3zls; 7m0u; 3eqh; 3eqg; 3eqf; 6pp9; 6v2w; 7m0v; 7m0w; 7m0z; 7m0x; 8dgs; 6u2g; 7m0t; 7juy; 7juw; 5yt3; 7m0y; 3zlw; 3eqc; 3zlx; 2y4i; 5kkr; 3zly; 6q0t; 6q0j; 7xlp; 3zm…
					phosphoaminophosphonic acid-adenylate ester	bound	ANP	4.66005	3	3alo; 3aln; 5yt3	3	70	3alo; 3aln; 3vn9; 8a8m; 3enm; 8p7j; 6yg1; 6ib0; 6yg2; 6yz4; 5b2l; 7ovn; 6qg7; 7ovm; 7cbx; 6yg7; 7ovl; 5z1e; 6qft; 6qhr; 5z1d; 6yg3; 6qho; 6qg4; 6yg5; 6yg4; 1s9i; 3w8q; 5bx0; 8dgt; 3eqd; 3eqi; 3zls; 7m0u; 3eqh; 3eqg; 3eqf; 6pp9; 6v2w; 7m0v; 7m0w; 7m0z; 7m0x; 8dgs; 6u2g; 7m0t; 7juy; 7juw; 5yt3; 7m0y; 3zlw; 3eqc; 3zlx; 2y4i; 5kkr; 3zly; 6q0t; 6q0j; 7xlp; 3zm4; 7pqv; 7jux; 7juz; 7jv1; 7jv0; 7xnc; 5hz…	77	3alo; 3aln; 3vut; 3vn9; 8a8m; 3enm; 8p7j; 6yg1; 6yfz; 6ib0; 5y90; 6yg2; 6yz4; 6qfl; 5b2l; 7ovn; 6qg7; 7ovm; 7cbx; 6yg0; 6yg7; 7ovl; 5z1e; 6qft; 6qhr; 5z1d; 2dyl; 6qfr; 6yg3; 6qho; 6qg4; 6yg5; 6yg4; 1s9i; 3w8q; 5bx0; 8dgt; 3eqd; 3eqi; 3zls; 7m0u; 3eqh; 3eqg; 3eqf; 6pp9; 6v2w; 7m0v; 7m0w; 7m0z; 7m0x; 8dgs; 6u2g; 7m0t; 7juy; 7juw; 5yt3; 7m0y; 3zlw; 3eqc; 3zlx; 2y4i; 5kkr; 3zly; 6q0t; 6q0j; 7xlp; 3zm…
					5-[(4-bromo-2-chlorophenyl)amino]-4-fluoro-n-(2-hydroxyethoxy)-1-methyl-1h-benzimidazole-6-carboxamide	bound	3EW	2.863	2	7m0t; 7juz	2	70	3alo; 3aln; 3vn9; 8a8m; 3enm; 8p7j; 6yg1; 6ib0; 6yg2; 6yz4; 5b2l; 7ovn; 6qg7; 7ovm; 7cbx; 6yg7; 7ovl; 5z1e; 6qft; 6qhr; 5z1d; 6yg3; 6qho; 6qg4; 6yg5; 6yg4; 1s9i; 3w8q; 5bx0; 8dgt; 3eqd; 3eqi; 3zls; 7m0u; 3eqh; 3eqg; 3eqf; 6pp9; 6v2w; 7m0v; 7m0w; 7m0z; 7m0x; 8dgs; 6u2g; 7m0t; 7juy; 7juw; 5yt3; 7m0y; 3zlw; 3eqc; 3zlx; 2y4i; 5kkr; 3zly; 6q0t; 6q0j; 7xlp; 3zm4; 7pqv; 7jux; 7juz; 7jv1; 7jv0; 7xnc; 5hz…	77	3alo; 3aln; 3vut; 3vn9; 8a8m; 3enm; 8p7j; 6yg1; 6yfz; 6ib0; 5y90; 6yg2; 6yz4; 6qfl; 5b2l; 7ovn; 6qg7; 7ovm; 7cbx; 6yg0; 6yg7; 7ovl; 5z1e; 6qft; 6qhr; 5z1d; 2dyl; 6qfr; 6yg3; 6qho; 6qg4; 6yg5; 6yg4; 1s9i; 3w8q; 5bx0; 8dgt; 3eqd; 3eqi; 3zls; 7m0u; 3eqh; 3eqg; 3eqf; 6pp9; 6v2w; 7m0v; 7m0w; 7m0z; 7m0x; 8dgs; 6u2g; 7m0t; 7juy; 7juw; 5yt3; 7m0y; 3zlw; 3eqc; 3zlx; 2y4i; 5kkr; 3zly; 6q0t; 6q0j; 7xlp; 3zm…
					[3,4-bis(fluoranyl)-2-[(2-fluoranyl-4-iodanyl-phenyl)amino]phenyl]-[3-oxidanyl-3-[(2s)-piperidin-2-yl]azetidin-1-yl]methanone	bound	EUI	2.60805	2	7m0v; 7juy	2	70	3alo; 3aln; 3vn9; 8a8m; 3enm; 8p7j; 6yg1; 6ib0; 6yg2; 6yz4; 5b2l; 7ovn; 6qg7; 7ovm; 7cbx; 6yg7; 7ovl; 5z1e; 6qft; 6qhr; 5z1d; 6yg3; 6qho; 6qg4; 6yg5; 6yg4; 1s9i; 3w8q; 5bx0; 8dgt; 3eqd; 3eqi; 3zls; 7m0u; 3eqh; 3eqg; 3eqf; 6pp9; 6v2w; 7m0v; 7m0w; 7m0z; 7m0x; 8dgs; 6u2g; 7m0t; 7juy; 7juw; 5yt3; 7m0y; 3zlw; 3eqc; 3zlx; 2y4i; 5kkr; 3zly; 6q0t; 6q0j; 7xlp; 3zm4; 7pqv; 7jux; 7juz; 7jv1; 7jv0; 7xnc; 5hz…	77	3alo; 3aln; 3vut; 3vn9; 8a8m; 3enm; 8p7j; 6yg1; 6yfz; 6ib0; 5y90; 6yg2; 6yz4; 6qfl; 5b2l; 7ovn; 6qg7; 7ovm; 7cbx; 6yg0; 6yg7; 7ovl; 5z1e; 6qft; 6qhr; 5z1d; 2dyl; 6qfr; 6yg3; 6qho; 6qg4; 6yg5; 6yg4; 1s9i; 3w8q; 5bx0; 8dgt; 3eqd; 3eqi; 3zls; 7m0u; 3eqh; 3eqg; 3eqf; 6pp9; 6v2w; 7m0v; 7m0w; 7m0z; 7m0x; 8dgs; 6u2g; 7m0t; 7juy; 7juw; 5yt3; 7m0y; 3zlw; 3eqc; 3zlx; 2y4i; 5kkr; 3zly; 6q0t; 6q0j; 7xlp; 3zm…
					n-(3-{3-cyclopropyl-5-[(2-fluoro-4-iodophenyl)amino]-6,8-dimethyl-2,4,7-trioxo-3,4,6,7-tetrahydropyrido[4,3-d]pyrimidin-1(2h)-yl}phenyl)-n'-methylsulfuric diamide	bound	VKG	2.8554	2	7jv1; 7juv	2	70	3alo; 3aln; 3vn9; 8a8m; 3enm; 8p7j; 6yg1; 6ib0; 6yg2; 6yz4; 5b2l; 7ovn; 6qg7; 7ovm; 7cbx; 6yg7; 7ovl; 5z1e; 6qft; 6qhr; 5z1d; 6yg3; 6qho; 6qg4; 6yg5; 6yg4; 1s9i; 3w8q; 5bx0; 8dgt; 3eqd; 3eqi; 3zls; 7m0u; 3eqh; 3eqg; 3eqf; 6pp9; 6v2w; 7m0v; 7m0w; 7m0z; 7m0x; 8dgs; 6u2g; 7m0t; 7juy; 7juw; 5yt3; 7m0y; 3zlw; 3eqc; 3zlx; 2y4i; 5kkr; 3zly; 6q0t; 6q0j; 7xlp; 3zm4; 7pqv; 7jux; 7juz; 7jv1; 7jv0; 7xnc; 5hz…	77	3alo; 3aln; 3vut; 3vn9; 8a8m; 3enm; 8p7j; 6yg1; 6yfz; 6ib0; 5y90; 6yg2; 6yz4; 6qfl; 5b2l; 7ovn; 6qg7; 7ovm; 7cbx; 6yg0; 6yg7; 7ovl; 5z1e; 6qft; 6qhr; 5z1d; 2dyl; 6qfr; 6yg3; 6qho; 6qg4; 6yg5; 6yg4; 1s9i; 3w8q; 5bx0; 8dgt; 3eqd; 3eqi; 3zls; 7m0u; 3eqh; 3eqg; 3eqf; 6pp9; 6v2w; 7m0v; 7m0w; 7m0z; 7m0x; 8dgs; 6u2g; 7m0t; 7juy; 7juw; 5yt3; 7m0y; 3zlw; 3eqc; 3zlx; 2y4i; 5kkr; 3zly; 6q0t; 6q0j; 7xlp; 3zm…
					trametinib	bound	QOM	2.92518	2	7m0y; 7jux	2	70	3alo; 3aln; 3vn9; 8a8m; 3enm; 8p7j; 6yg1; 6ib0; 6yg2; 6yz4; 5b2l; 7ovn; 6qg7; 7ovm; 7cbx; 6yg7; 7ovl; 5z1e; 6qft; 6qhr; 5z1d; 6yg3; 6qho; 6qg4; 6yg5; 6yg4; 1s9i; 3w8q; 5bx0; 8dgt; 3eqd; 3eqi; 3zls; 7m0u; 3eqh; 3eqg; 3eqf; 6pp9; 6v2w; 7m0v; 7m0w; 7m0z; 7m0x; 8dgs; 6u2g; 7m0t; 7juy; 7juw; 5yt3; 7m0y; 3zlw; 3eqc; 3zlx; 2y4i; 5kkr; 3zly; 6q0t; 6q0j; 7xlp; 3zm4; 7pqv; 7jux; 7juz; 7jv1; 7jv0; 7xnc; 5hz…	77	3alo; 3aln; 3vut; 3vn9; 8a8m; 3enm; 8p7j; 6yg1; 6yfz; 6ib0; 5y90; 6yg2; 6yz4; 6qfl; 5b2l; 7ovn; 6qg7; 7ovm; 7cbx; 6yg0; 6yg7; 7ovl; 5z1e; 6qft; 6qhr; 5z1d; 2dyl; 6qfr; 6yg3; 6qho; 6qg4; 6yg5; 6yg4; 1s9i; 3w8q; 5bx0; 8dgt; 3eqd; 3eqi; 3zls; 7m0u; 3eqh; 3eqg; 3eqf; 6pp9; 6v2w; 7m0v; 7m0w; 7m0z; 7m0x; 8dgs; 6u2g; 7m0t; 7juy; 7juw; 5yt3; 7m0y; 3zlw; 3eqc; 3zlx; 2y4i; 5kkr; 3zly; 6q0t; 6q0j; 7xlp; 3zm…
					5-{3,4-difluoro-2-[(2-fluoro-4-iodophenyl)amino]phenyl}-n-(2-morpholin-4-ylethyl)-1,3,4-oxadiazol-2-amine	bound	5EA	2.63074	1	1s9i	1	70	3alo; 3aln; 3vn9; 8a8m; 3enm; 8p7j; 6yg1; 6ib0; 6yg2; 6yz4; 5b2l; 7ovn; 6qg7; 7ovm; 7cbx; 6yg7; 7ovl; 5z1e; 6qft; 6qhr; 5z1d; 6yg3; 6qho; 6qg4; 6yg5; 6yg4; 1s9i; 3w8q; 5bx0; 8dgt; 3eqd; 3eqi; 3zls; 7m0u; 3eqh; 3eqg; 3eqf; 6pp9; 6v2w; 7m0v; 7m0w; 7m0z; 7m0x; 8dgs; 6u2g; 7m0t; 7juy; 7juw; 5yt3; 7m0y; 3zlw; 3eqc; 3zlx; 2y4i; 5kkr; 3zly; 6q0t; 6q0j; 7xlp; 3zm4; 7pqv; 7jux; 7juz; 7jv1; 7jv0; 7xnc; 5hz…	77	3alo; 3aln; 3vut; 3vn9; 8a8m; 3enm; 8p7j; 6yg1; 6yfz; 6ib0; 5y90; 6yg2; 6yz4; 6qfl; 5b2l; 7ovn; 6qg7; 7ovm; 7cbx; 6yg0; 6yg7; 7ovl; 5z1e; 6qft; 6qhr; 5z1d; 2dyl; 6qfr; 6yg3; 6qho; 6qg4; 6yg5; 6yg4; 1s9i; 3w8q; 5bx0; 8dgt; 3eqd; 3eqi; 3zls; 7m0u; 3eqh; 3eqg; 3eqf; 6pp9; 6v2w; 7m0v; 7m0w; 7m0z; 7m0x; 8dgs; 6u2g; 7m0t; 7juy; 7juw; 5yt3; 7m0y; 3zlw; 3eqc; 3zlx; 2y4i; 5kkr; 3zly; 6q0t; 6q0j; 7xlp; 3zm…
					(1~{r},3~{s})-3-[[6-[2-chloranyl-4-(4-methylpyrimidin-2-yl)oxy-phenyl]-3-methyl-1~{h}-indazol-4-yl]oxy]cyclohexan-1-amine	bound	FZC	5.95053	1	7xlp	1	70	3alo; 3aln; 3vn9; 8a8m; 3enm; 8p7j; 6yg1; 6ib0; 6yg2; 6yz4; 5b2l; 7ovn; 6qg7; 7ovm; 7cbx; 6yg7; 7ovl; 5z1e; 6qft; 6qhr; 5z1d; 6yg3; 6qho; 6qg4; 6yg5; 6yg4; 1s9i; 3w8q; 5bx0; 8dgt; 3eqd; 3eqi; 3zls; 7m0u; 3eqh; 3eqg; 3eqf; 6pp9; 6v2w; 7m0v; 7m0w; 7m0z; 7m0x; 8dgs; 6u2g; 7m0t; 7juy; 7juw; 5yt3; 7m0y; 3zlw; 3eqc; 3zlx; 2y4i; 5kkr; 3zly; 6q0t; 6q0j; 7xlp; 3zm4; 7pqv; 7jux; 7juz; 7jv1; 7jv0; 7xnc; 5hz…	77	3alo; 3aln; 3vut; 3vn9; 8a8m; 3enm; 8p7j; 6yg1; 6yfz; 6ib0; 5y90; 6yg2; 6yz4; 6qfl; 5b2l; 7ovn; 6qg7; 7ovm; 7cbx; 6yg0; 6yg7; 7ovl; 5z1e; 6qft; 6qhr; 5z1d; 2dyl; 6qfr; 6yg3; 6qho; 6qg4; 6yg5; 6yg4; 1s9i; 3w8q; 5bx0; 8dgt; 3eqd; 3eqi; 3zls; 7m0u; 3eqh; 3eqg; 3eqf; 6pp9; 6v2w; 7m0v; 7m0w; 7m0z; 7m0x; 8dgs; 6u2g; 7m0t; 7juy; 7juw; 5yt3; 7m0y; 3zlw; 3eqc; 3zlx; 2y4i; 5kkr; 3zly; 6q0t; 6q0j; 7xlp; 3zm…
					(2z)-bis{amino[(2-aminophenyl)sulfanyl]methylidene}butanedinitrile	bound	5BM	3.23299	1	3eqh	1	70	3alo; 3aln; 3vn9; 8a8m; 3enm; 8p7j; 6yg1; 6ib0; 6yg2; 6yz4; 5b2l; 7ovn; 6qg7; 7ovm; 7cbx; 6yg7; 7ovl; 5z1e; 6qft; 6qhr; 5z1d; 6yg3; 6qho; 6qg4; 6yg5; 6yg4; 1s9i; 3w8q; 5bx0; 8dgt; 3eqd; 3eqi; 3zls; 7m0u; 3eqh; 3eqg; 3eqf; 6pp9; 6v2w; 7m0v; 7m0w; 7m0z; 7m0x; 8dgs; 6u2g; 7m0t; 7juy; 7juw; 5yt3; 7m0y; 3zlw; 3eqc; 3zlx; 2y4i; 5kkr; 3zly; 6q0t; 6q0j; 7xlp; 3zm4; 7pqv; 7jux; 7juz; 7jv1; 7jv0; 7xnc; 5hz…	77	3alo; 3aln; 3vut; 3vn9; 8a8m; 3enm; 8p7j; 6yg1; 6yfz; 6ib0; 5y90; 6yg2; 6yz4; 6qfl; 5b2l; 7ovn; 6qg7; 7ovm; 7cbx; 6yg0; 6yg7; 7ovl; 5z1e; 6qft; 6qhr; 5z1d; 2dyl; 6qfr; 6yg3; 6qho; 6qg4; 6yg5; 6yg4; 1s9i; 3w8q; 5bx0; 8dgt; 3eqd; 3eqi; 3zls; 7m0u; 3eqh; 3eqg; 3eqf; 6pp9; 6v2w; 7m0v; 7m0w; 7m0z; 7m0x; 8dgs; 6u2g; 7m0t; 7juy; 7juw; 5yt3; 7m0y; 3zlw; 3eqc; 3zlx; 2y4i; 5kkr; 3zly; 6q0t; 6q0j; 7xlp; 3zm…
					2-[(2-chloro-4-iodophenyl)amino]-n-{[(2r)-2,3-dihydroxypropyl]oxy}-3,4-difluorobenzamide	bound	3BM	3.02046	1	3eqc	1	70	3alo; 3aln; 3vn9; 8a8m; 3enm; 8p7j; 6yg1; 6ib0; 6yg2; 6yz4; 5b2l; 7ovn; 6qg7; 7ovm; 7cbx; 6yg7; 7ovl; 5z1e; 6qft; 6qhr; 5z1d; 6yg3; 6qho; 6qg4; 6yg5; 6yg4; 1s9i; 3w8q; 5bx0; 8dgt; 3eqd; 3eqi; 3zls; 7m0u; 3eqh; 3eqg; 3eqf; 6pp9; 6v2w; 7m0v; 7m0w; 7m0z; 7m0x; 8dgs; 6u2g; 7m0t; 7juy; 7juw; 5yt3; 7m0y; 3zlw; 3eqc; 3zlx; 2y4i; 5kkr; 3zly; 6q0t; 6q0j; 7xlp; 3zm4; 7pqv; 7jux; 7juz; 7jv1; 7jv0; 7xnc; 5hz…	77	3alo; 3aln; 3vut; 3vn9; 8a8m; 3enm; 8p7j; 6yg1; 6yfz; 6ib0; 5y90; 6yg2; 6yz4; 6qfl; 5b2l; 7ovn; 6qg7; 7ovm; 7cbx; 6yg0; 6yg7; 7ovl; 5z1e; 6qft; 6qhr; 5z1d; 2dyl; 6qfr; 6yg3; 6qho; 6qg4; 6yg5; 6yg4; 1s9i; 3w8q; 5bx0; 8dgt; 3eqd; 3eqi; 3zls; 7m0u; 3eqh; 3eqg; 3eqf; 6pp9; 6v2w; 7m0v; 7m0w; 7m0z; 7m0x; 8dgs; 6u2g; 7m0t; 7juy; 7juw; 5yt3; 7m0y; 3zlw; 3eqc; 3zlx; 2y4i; 5kkr; 3zly; 6q0t; 6q0j; 7xlp; 3zm…
					5-[(4-bromo-2-fluorophenyl)amino]-4-fluoro-n-(2-hydroxyethoxy)-1-methyl-1h-benzimidazole-6-carboxamide	bound	QO7	2.97276	1	7m0u	1	70	3alo; 3aln; 3vn9; 8a8m; 3enm; 8p7j; 6yg1; 6ib0; 6yg2; 6yz4; 5b2l; 7ovn; 6qg7; 7ovm; 7cbx; 6yg7; 7ovl; 5z1e; 6qft; 6qhr; 5z1d; 6yg3; 6qho; 6qg4; 6yg5; 6yg4; 1s9i; 3w8q; 5bx0; 8dgt; 3eqd; 3eqi; 3zls; 7m0u; 3eqh; 3eqg; 3eqf; 6pp9; 6v2w; 7m0v; 7m0w; 7m0z; 7m0x; 8dgs; 6u2g; 7m0t; 7juy; 7juw; 5yt3; 7m0y; 3zlw; 3eqc; 3zlx; 2y4i; 5kkr; 3zly; 6q0t; 6q0j; 7xlp; 3zm4; 7pqv; 7jux; 7juz; 7jv1; 7jv0; 7xnc; 5hz…	77	3alo; 3aln; 3vut; 3vn9; 8a8m; 3enm; 8p7j; 6yg1; 6yfz; 6ib0; 5y90; 6yg2; 6yz4; 6qfl; 5b2l; 7ovn; 6qg7; 7ovm; 7cbx; 6yg0; 6yg7; 7ovl; 5z1e; 6qft; 6qhr; 5z1d; 2dyl; 6qfr; 6yg3; 6qho; 6qg4; 6yg5; 6yg4; 1s9i; 3w8q; 5bx0; 8dgt; 3eqd; 3eqi; 3zls; 7m0u; 3eqh; 3eqg; 3eqf; 6pp9; 6v2w; 7m0v; 7m0w; 7m0z; 7m0x; 8dgs; 6u2g; 7m0t; 7juy; 7juw; 5yt3; 7m0y; 3zlw; 3eqc; 3zlx; 2y4i; 5kkr; 3zly; 6q0t; 6q0j; 7xlp; 3zm…
					9-{5-o-[(r)-hydroxy{[(s)-hydroxy(phosphonoamino)phosphoryl]oxy}phosphoryl]-beta-l-ribofuranosyl}-9h-purin-6-amine	bound	ANK	3.69231	1	3vn9	1	70	3alo; 3aln; 3vn9; 8a8m; 3enm; 8p7j; 6yg1; 6ib0; 6yg2; 6yz4; 5b2l; 7ovn; 6qg7; 7ovm; 7cbx; 6yg7; 7ovl; 5z1e; 6qft; 6qhr; 5z1d; 6yg3; 6qho; 6qg4; 6yg5; 6yg4; 1s9i; 3w8q; 5bx0; 8dgt; 3eqd; 3eqi; 3zls; 7m0u; 3eqh; 3eqg; 3eqf; 6pp9; 6v2w; 7m0v; 7m0w; 7m0z; 7m0x; 8dgs; 6u2g; 7m0t; 7juy; 7juw; 5yt3; 7m0y; 3zlw; 3eqc; 3zlx; 2y4i; 5kkr; 3zly; 6q0t; 6q0j; 7xlp; 3zm4; 7pqv; 7jux; 7juz; 7jv1; 7jv0; 7xnc; 5hz…	77	3alo; 3aln; 3vut; 3vn9; 8a8m; 3enm; 8p7j; 6yg1; 6yfz; 6ib0; 5y90; 6yg2; 6yz4; 6qfl; 5b2l; 7ovn; 6qg7; 7ovm; 7cbx; 6yg0; 6yg7; 7ovl; 5z1e; 6qft; 6qhr; 5z1d; 2dyl; 6qfr; 6yg3; 6qho; 6qg4; 6yg5; 6yg4; 1s9i; 3w8q; 5bx0; 8dgt; 3eqd; 3eqi; 3zls; 7m0u; 3eqh; 3eqg; 3eqf; 6pp9; 6v2w; 7m0v; 7m0w; 7m0z; 7m0x; 8dgs; 6u2g; 7m0t; 7juy; 7juw; 5yt3; 7m0y; 3zlw; 3eqc; 3zlx; 2y4i; 5kkr; 3zly; 6q0t; 6q0j; 7xlp; 3zm…
					calcium ion	bound	CA	7.38201	1	7xlp	1	70	3alo; 3aln; 3vn9; 8a8m; 3enm; 8p7j; 6yg1; 6ib0; 6yg2; 6yz4; 5b2l; 7ovn; 6qg7; 7ovm; 7cbx; 6yg7; 7ovl; 5z1e; 6qft; 6qhr; 5z1d; 6yg3; 6qho; 6qg4; 6yg5; 6yg4; 1s9i; 3w8q; 5bx0; 8dgt; 3eqd; 3eqi; 3zls; 7m0u; 3eqh; 3eqg; 3eqf; 6pp9; 6v2w; 7m0v; 7m0w; 7m0z; 7m0x; 8dgs; 6u2g; 7m0t; 7juy; 7juw; 5yt3; 7m0y; 3zlw; 3eqc; 3zlx; 2y4i; 5kkr; 3zly; 6q0t; 6q0j; 7xlp; 3zm4; 7pqv; 7jux; 7juz; 7jv1; 7jv0; 7xnc; 5hz…	77	3alo; 3aln; 3vut; 3vn9; 8a8m; 3enm; 8p7j; 6yg1; 6yfz; 6ib0; 5y90; 6yg2; 6yz4; 6qfl; 5b2l; 7ovn; 6qg7; 7ovm; 7cbx; 6yg0; 6yg7; 7ovl; 5z1e; 6qft; 6qhr; 5z1d; 2dyl; 6qfr; 6yg3; 6qho; 6qg4; 6yg5; 6yg4; 1s9i; 3w8q; 5bx0; 8dgt; 3eqd; 3eqi; 3zls; 7m0u; 3eqh; 3eqg; 3eqf; 6pp9; 6v2w; 7m0v; 7m0w; 7m0z; 7m0x; 8dgs; 6u2g; 7m0t; 7juy; 7juw; 5yt3; 7m0y; 3zlw; 3eqc; 3zlx; 2y4i; 5kkr; 3zly; 6q0t; 6q0j; 7xlp; 3zm…
					cobimetinib	bound	VKD	3.45324	1	7jus	1	70	3alo; 3aln; 3vn9; 8a8m; 3enm; 8p7j; 6yg1; 6ib0; 6yg2; 6yz4; 5b2l; 7ovn; 6qg7; 7ovm; 7cbx; 6yg7; 7ovl; 5z1e; 6qft; 6qhr; 5z1d; 6yg3; 6qho; 6qg4; 6yg5; 6yg4; 1s9i; 3w8q; 5bx0; 8dgt; 3eqd; 3eqi; 3zls; 7m0u; 3eqh; 3eqg; 3eqf; 6pp9; 6v2w; 7m0v; 7m0w; 7m0z; 7m0x; 8dgs; 6u2g; 7m0t; 7juy; 7juw; 5yt3; 7m0y; 3zlw; 3eqc; 3zlx; 2y4i; 5kkr; 3zly; 6q0t; 6q0j; 7xlp; 3zm4; 7pqv; 7jux; 7juz; 7jv1; 7jv0; 7xnc; 5hz…	77	3alo; 3aln; 3vut; 3vn9; 8a8m; 3enm; 8p7j; 6yg1; 6yfz; 6ib0; 5y90; 6yg2; 6yz4; 6qfl; 5b2l; 7ovn; 6qg7; 7ovm; 7cbx; 6yg0; 6yg7; 7ovl; 5z1e; 6qft; 6qhr; 5z1d; 2dyl; 6qfr; 6yg3; 6qho; 6qg4; 6yg5; 6yg4; 1s9i; 3w8q; 5bx0; 8dgt; 3eqd; 3eqi; 3zls; 7m0u; 3eqh; 3eqg; 3eqf; 6pp9; 6v2w; 7m0v; 7m0w; 7m0z; 7m0x; 8dgs; 6u2g; 7m0t; 7juy; 7juw; 5yt3; 7m0y; 3zlw; 3eqc; 3zlx; 2y4i; 5kkr; 3zly; 6q0t; 6q0j; 7xlp; 3zm…
					n-(3-fluoro-4-{[4-methyl-2-oxo-7-(pyrimidin-2-yloxy)-2h-chromen-3-yl]methyl}pyridin-2-yl)-n'-methylsulfuric diamide	bound	CHU	3.12442	1	7m0z	1	70	3alo; 3aln; 3vn9; 8a8m; 3enm; 8p7j; 6yg1; 6ib0; 6yg2; 6yz4; 5b2l; 7ovn; 6qg7; 7ovm; 7cbx; 6yg7; 7ovl; 5z1e; 6qft; 6qhr; 5z1d; 6yg3; 6qho; 6qg4; 6yg5; 6yg4; 1s9i; 3w8q; 5bx0; 8dgt; 3eqd; 3eqi; 3zls; 7m0u; 3eqh; 3eqg; 3eqf; 6pp9; 6v2w; 7m0v; 7m0w; 7m0z; 7m0x; 8dgs; 6u2g; 7m0t; 7juy; 7juw; 5yt3; 7m0y; 3zlw; 3eqc; 3zlx; 2y4i; 5kkr; 3zly; 6q0t; 6q0j; 7xlp; 3zm4; 7pqv; 7jux; 7juz; 7jv1; 7jv0; 7xnc; 5hz…	77	3alo; 3aln; 3vut; 3vn9; 8a8m; 3enm; 8p7j; 6yg1; 6yfz; 6ib0; 5y90; 6yg2; 6yz4; 6qfl; 5b2l; 7ovn; 6qg7; 7ovm; 7cbx; 6yg0; 6yg7; 7ovl; 5z1e; 6qft; 6qhr; 5z1d; 2dyl; 6qfr; 6yg3; 6qho; 6qg4; 6yg5; 6yg4; 1s9i; 3w8q; 5bx0; 8dgt; 3eqd; 3eqi; 3zls; 7m0u; 3eqh; 3eqg; 3eqf; 6pp9; 6v2w; 7m0v; 7m0w; 7m0z; 7m0x; 8dgs; 6u2g; 7m0t; 7juy; 7juw; 5yt3; 7m0y; 3zlw; 3eqc; 3zlx; 2y4i; 5kkr; 3zly; 6q0t; 6q0j; 7xlp; 3zm…
					n-[(2s)-2,3-dihydroxypropyl]-3-[(2-fluoro-4-iodophenyl)amino]pyridine-4-carboxamide	bound	QOA	3.38832	1	7m0w	1	70	3alo; 3aln; 3vn9; 8a8m; 3enm; 8p7j; 6yg1; 6ib0; 6yg2; 6yz4; 5b2l; 7ovn; 6qg7; 7ovm; 7cbx; 6yg7; 7ovl; 5z1e; 6qft; 6qhr; 5z1d; 6yg3; 6qho; 6qg4; 6yg5; 6yg4; 1s9i; 3w8q; 5bx0; 8dgt; 3eqd; 3eqi; 3zls; 7m0u; 3eqh; 3eqg; 3eqf; 6pp9; 6v2w; 7m0v; 7m0w; 7m0z; 7m0x; 8dgs; 6u2g; 7m0t; 7juy; 7juw; 5yt3; 7m0y; 3zlw; 3eqc; 3zlx; 2y4i; 5kkr; 3zly; 6q0t; 6q0j; 7xlp; 3zm4; 7pqv; 7jux; 7juz; 7jv1; 7jv0; 7xnc; 5hz…	77	3alo; 3aln; 3vut; 3vn9; 8a8m; 3enm; 8p7j; 6yg1; 6yfz; 6ib0; 5y90; 6yg2; 6yz4; 6qfl; 5b2l; 7ovn; 6qg7; 7ovm; 7cbx; 6yg0; 6yg7; 7ovl; 5z1e; 6qft; 6qhr; 5z1d; 2dyl; 6qfr; 6yg3; 6qho; 6qg4; 6yg5; 6yg4; 1s9i; 3w8q; 5bx0; 8dgt; 3eqd; 3eqi; 3zls; 7m0u; 3eqh; 3eqg; 3eqf; 6pp9; 6v2w; 7m0v; 7m0w; 7m0z; 7m0x; 8dgs; 6u2g; 7m0t; 7juy; 7juw; 5yt3; 7m0y; 3zlw; 3eqc; 3zlx; 2y4i; 5kkr; 3zly; 6q0t; 6q0j; 7xlp; 3zm…
					phosphothiophosphoric acid-adenylate ester	bound	AGS	2.68418	1	3w8q	1	70	3alo; 3aln; 3vn9; 8a8m; 3enm; 8p7j; 6yg1; 6ib0; 6yg2; 6yz4; 5b2l; 7ovn; 6qg7; 7ovm; 7cbx; 6yg7; 7ovl; 5z1e; 6qft; 6qhr; 5z1d; 6yg3; 6qho; 6qg4; 6yg5; 6yg4; 1s9i; 3w8q; 5bx0; 8dgt; 3eqd; 3eqi; 3zls; 7m0u; 3eqh; 3eqg; 3eqf; 6pp9; 6v2w; 7m0v; 7m0w; 7m0z; 7m0x; 8dgs; 6u2g; 7m0t; 7juy; 7juw; 5yt3; 7m0y; 3zlw; 3eqc; 3zlx; 2y4i; 5kkr; 3zly; 6q0t; 6q0j; 7xlp; 3zm4; 7pqv; 7jux; 7juz; 7jv1; 7jv0; 7xnc; 5hz…	77	3alo; 3aln; 3vut; 3vn9; 8a8m; 3enm; 8p7j; 6yg1; 6yfz; 6ib0; 5y90; 6yg2; 6yz4; 6qfl; 5b2l; 7ovn; 6qg7; 7ovm; 7cbx; 6yg0; 6yg7; 7ovl; 5z1e; 6qft; 6qhr; 5z1d; 2dyl; 6qfr; 6yg3; 6qho; 6qg4; 6yg5; 6yg4; 1s9i; 3w8q; 5bx0; 8dgt; 3eqd; 3eqi; 3zls; 7m0u; 3eqh; 3eqg; 3eqf; 6pp9; 6v2w; 7m0v; 7m0w; 7m0z; 7m0x; 8dgs; 6u2g; 7m0t; 7juy; 7juw; 5yt3; 7m0y; 3zlw; 3eqc; 3zlx; 2y4i; 5kkr; 3zly; 6q0t; 6q0j; 7xlp; 3zm…
22	ZBED4	NP_055653.2	C136R	-5.789					0		0	0		0
10	NFKB2	NP_001309863.1	W270R	-5.77					0		0	28	7vuq; 7vup; 7cli; 7w7l; 3do7; 1a3q; 2v2t; 2i9t; 1nfk; 1lei; 1le9; 1le5; 1ooa; 1vkx; 2o61; 3gut; 1svc; 5zmc; 1gji; 3jv6; 1nfi; 1ikn; 1ram; 5u01; 2ram; 3jv4; 1oy3; 1k3z	43	7vuq; 7vup; 7cli; 7w7l; 3do7; 1a3q; 2v2t; 2i9t; 1nfk; 1lei; 1le9; 1le5; 1ooa; 1vkx; 2o61; 3gut; 1svc; 5zmc; 1gji; 3jv6; 3jv5; 1nfi; 1ikn; 1ram; 5u01; 2ram; 3jv4; 1bfs; 1u3z; 1u41; 1u42; 1u36; 1u3j; 1u3y; 1oy3; 1k3z; 1zka; 1zk9; 4jgm; 4jhb; 1my7; 1my5; 3juz
			V190G	-5.585	(2s,3s)-1,4-dimercaptobutane-2,3-diol	bound	DTV	7.62281	1	2ram	1	25	7vuq; 7vup; 7cli; 7w7l; 3do7; 1a3q; 2v2t; 2i9t; 1nfk; 1lei; 1le9; 1le5; 1ooa; 1vkx; 2o61; 3gut; 1svc; 1gji; 1nfi; 1ikn; 1ram; 5u01; 2ram; 1bvo; 6ggr	25	7vuq; 7vup; 7cli; 7w7l; 3do7; 1a3q; 2v2t; 2i9t; 1nfk; 1lei; 1le9; 1le5; 1ooa; 1vkx; 2o61; 3gut; 1svc; 1gji; 1nfi; 1ikn; 1ram; 5u01; 2ram; 1bvo; 6ggr
					2,3-dihydroxy-1,4-dithiobutane	bound	DTT	7.81146	1	1ram	1	25	7vuq; 7vup; 7cli; 7w7l; 3do7; 1a3q; 2v2t; 2i9t; 1nfk; 1lei; 1le9; 1le5; 1ooa; 1vkx; 2o61; 3gut; 1svc; 1gji; 1nfi; 1ikn; 1ram; 5u01; 2ram; 1bvo; 6ggr	25	7vuq; 7vup; 7cli; 7w7l; 3do7; 1a3q; 2v2t; 2i9t; 1nfk; 1lei; 1le9; 1le5; 1ooa; 1vkx; 2o61; 3gut; 1svc; 1gji; 1nfi; 1ikn; 1ram; 5u01; 2ram; 1bvo; 6ggr
14	CALM1	NP_001350599.1	D24Y	-5.769	calcium ion	bound	CA	2.03063	52	2l7l; 1mux; 6feh; 5j8h; 5dow; 1prw; 6feg; 7nqc; 1cff; 1ckk; 6e2g; 6o20; 6gdk; 2o60; 1sy9; 5t0x; 1x02; 2jzi; 2k0e; 2kne; 1up5; 2m3s; 4djc; 6e2f; 2kdu; 2m55; 2n27; 2lv6; 6y94; 6zbi; 2m0j; 3g43; 2mgu; 1nwd; 2m0k; 1wrz; 2o5g; 3sjq; 7tzc; 2k0j; 6mud; 6tv7; 1g4y; 5jqa; 5jth; 6u3a; 1xfz; 6b8n; 4j9y; 5ggm; 5j03; 6b8m	52	70	2l7l; 1mux; 6feh; 5j8h; 5dow; 1prw; 6feg; 7nqc; 1cff; 1ckk; 6e2g; 6o20; 5oeo; 6gdk; 2o60; 1sy9; 4byf; 6but; 6c1d; 2ll6; 6c1g; 6c1h; 5t0x; 1x02; 2jzi; 2k0e; 7l8v; 2kne; 1up5; 2m3s; 2ll7; 4djc; 5tp6; 6e2f; 2kdu; 2n8j; 2m55; 2mg5; 2n27; 2lv6; 6y94; 6zbi; 2m0j; 3g43; 7yv9; 2mgu; 1nwd; 2m0k; 1wrz; 2o5g; 3sjq; 7tzc; 2k0j; 6mud; 6tv7; 1g4y; 4l79; 5jqa; 5jth; 6u3a; 1xfz; 1xfy; 6b8n; 6b8q; 6b8p; 4j9y; 5gg…	77	2l7l; 1mux; 6feh; 5j8h; 5dow; 1prw; 6feg; 7nqc; 1cfc; 1cfd; 1cff; 1ckk; 6e2g; 6o20; 5oeo; 1dmo; 5tp5; 6gdk; 2o60; 1sy9; 4byf; 6but; 6c1d; 2ll6; 6c1g; 6c1h; 5t0x; 1x02; 2jzi; 2k0e; 7l8v; 2kne; 1up5; 2m3s; 2ll7; 4djc; 5tp6; 6e2f; 2kdu; 2n8j; 2m55; 2mg5; 2n27; 2lv6; 6y94; 6zbi; 2m0j; 6y95; 3g43; 7yv9; 2mgu; 1nwd; 2m0k; 1wrz; 2o5g; 3sjq; 7tzc; 2k0j; 6mud; 6tv7; 1g4y; 4l79; 5jqa; 5jth; 1qx5; 6u3a; 1xf…
					potassium voltage-gated channel subfamily kqt member 4	polypeptide(L)		6.05657	4	6b8n; 6b8p; 6b8m; 6b8l	4	70	2l7l; 1mux; 6feh; 5j8h; 5dow; 1prw; 6feg; 7nqc; 1cff; 1ckk; 6e2g; 6o20; 5oeo; 6gdk; 2o60; 1sy9; 4byf; 6but; 6c1d; 2ll6; 6c1g; 6c1h; 5t0x; 1x02; 2jzi; 2k0e; 7l8v; 2kne; 1up5; 2m3s; 2ll7; 4djc; 5tp6; 6e2f; 2kdu; 2n8j; 2m55; 2mg5; 2n27; 2lv6; 6y94; 6zbi; 2m0j; 3g43; 7yv9; 2mgu; 1nwd; 2m0k; 1wrz; 2o5g; 3sjq; 7tzc; 2k0j; 6mud; 6tv7; 1g4y; 4l79; 5jqa; 5jth; 6u3a; 1xfz; 1xfy; 6b8n; 6b8q; 6b8p; 4j9y; 5gg…	77	2l7l; 1mux; 6feh; 5j8h; 5dow; 1prw; 6feg; 7nqc; 1cfc; 1cfd; 1cff; 1ckk; 6e2g; 6o20; 5oeo; 1dmo; 5tp5; 6gdk; 2o60; 1sy9; 4byf; 6but; 6c1d; 2ll6; 6c1g; 6c1h; 5t0x; 1x02; 2jzi; 2k0e; 7l8v; 2kne; 1up5; 2m3s; 2ll7; 4djc; 5tp6; 6e2f; 2kdu; 2n8j; 2m55; 2mg5; 2n27; 2lv6; 6y94; 6zbi; 2m0j; 6y95; 3g43; 7yv9; 2mgu; 1nwd; 2m0k; 1wrz; 2o5g; 3sjq; 7tzc; 2k0j; 6mud; 6tv7; 1g4y; 4l79; 5jqa; 5jth; 1qx5; 6u3a; 1xf…
					sulfate ion	bound	SO4	4.13421	4	6b8n; 6b8p; 6b8m; 6b8l	4	70	2l7l; 1mux; 6feh; 5j8h; 5dow; 1prw; 6feg; 7nqc; 1cff; 1ckk; 6e2g; 6o20; 5oeo; 6gdk; 2o60; 1sy9; 4byf; 6but; 6c1d; 2ll6; 6c1g; 6c1h; 5t0x; 1x02; 2jzi; 2k0e; 7l8v; 2kne; 1up5; 2m3s; 2ll7; 4djc; 5tp6; 6e2f; 2kdu; 2n8j; 2m55; 2mg5; 2n27; 2lv6; 6y94; 6zbi; 2m0j; 3g43; 7yv9; 2mgu; 1nwd; 2m0k; 1wrz; 2o5g; 3sjq; 7tzc; 2k0j; 6mud; 6tv7; 1g4y; 4l79; 5jqa; 5jth; 6u3a; 1xfz; 1xfy; 6b8n; 6b8q; 6b8p; 4j9y; 5gg…	77	2l7l; 1mux; 6feh; 5j8h; 5dow; 1prw; 6feg; 7nqc; 1cfc; 1cfd; 1cff; 1ckk; 6e2g; 6o20; 5oeo; 1dmo; 5tp5; 6gdk; 2o60; 1sy9; 4byf; 6but; 6c1d; 2ll6; 6c1g; 6c1h; 5t0x; 1x02; 2jzi; 2k0e; 7l8v; 2kne; 1up5; 2m3s; 2ll7; 4djc; 5tp6; 6e2f; 2kdu; 2n8j; 2m55; 2mg5; 2n27; 2lv6; 6y94; 6zbi; 2m0j; 6y95; 3g43; 7yv9; 2mgu; 1nwd; 2m0k; 1wrz; 2o5g; 3sjq; 7tzc; 2k0j; 6mud; 6tv7; 1g4y; 4l79; 5jqa; 5jth; 1qx5; 6u3a; 1xf…
					calmodulin-sensitive adenylate cyclase	polypeptide(L)		5.04479	2	1xfz; 1xfy	2	70	2l7l; 1mux; 6feh; 5j8h; 5dow; 1prw; 6feg; 7nqc; 1cff; 1ckk; 6e2g; 6o20; 5oeo; 6gdk; 2o60; 1sy9; 4byf; 6but; 6c1d; 2ll6; 6c1g; 6c1h; 5t0x; 1x02; 2jzi; 2k0e; 7l8v; 2kne; 1up5; 2m3s; 2ll7; 4djc; 5tp6; 6e2f; 2kdu; 2n8j; 2m55; 2mg5; 2n27; 2lv6; 6y94; 6zbi; 2m0j; 3g43; 7yv9; 2mgu; 1nwd; 2m0k; 1wrz; 2o5g; 3sjq; 7tzc; 2k0j; 6mud; 6tv7; 1g4y; 4l79; 5jqa; 5jth; 6u3a; 1xfz; 1xfy; 6b8n; 6b8q; 6b8p; 4j9y; 5gg…	77	2l7l; 1mux; 6feh; 5j8h; 5dow; 1prw; 6feg; 7nqc; 1cfc; 1cfd; 1cff; 1ckk; 6e2g; 6o20; 5oeo; 1dmo; 5tp5; 6gdk; 2o60; 1sy9; 4byf; 6but; 6c1d; 2ll6; 6c1g; 6c1h; 5t0x; 1x02; 2jzi; 2k0e; 7l8v; 2kne; 1up5; 2m3s; 2ll7; 4djc; 5tp6; 6e2f; 2kdu; 2n8j; 2m55; 2mg5; 2n27; 2lv6; 6y94; 6zbi; 2m0j; 6y95; 3g43; 7yv9; 2mgu; 1nwd; 2m0k; 1wrz; 2o5g; 3sjq; 7tzc; 2k0j; 6mud; 6tv7; 1g4y; 4l79; 5jqa; 5jth; 1qx5; 6u3a; 1xf…
					transient receptor potential cation channel subfamily v member 5	polypeptide(L)		2.09789	2	6o20; 5oeo	2	70	2l7l; 1mux; 6feh; 5j8h; 5dow; 1prw; 6feg; 7nqc; 1cff; 1ckk; 6e2g; 6o20; 5oeo; 6gdk; 2o60; 1sy9; 4byf; 6but; 6c1d; 2ll6; 6c1g; 6c1h; 5t0x; 1x02; 2jzi; 2k0e; 7l8v; 2kne; 1up5; 2m3s; 2ll7; 4djc; 5tp6; 6e2f; 2kdu; 2n8j; 2m55; 2mg5; 2n27; 2lv6; 6y94; 6zbi; 2m0j; 3g43; 7yv9; 2mgu; 1nwd; 2m0k; 1wrz; 2o5g; 3sjq; 7tzc; 2k0j; 6mud; 6tv7; 1g4y; 4l79; 5jqa; 5jth; 6u3a; 1xfz; 1xfy; 6b8n; 6b8q; 6b8p; 4j9y; 5gg…	77	2l7l; 1mux; 6feh; 5j8h; 5dow; 1prw; 6feg; 7nqc; 1cfc; 1cfd; 1cff; 1ckk; 6e2g; 6o20; 5oeo; 1dmo; 5tp5; 6gdk; 2o60; 1sy9; 4byf; 6but; 6c1d; 2ll6; 6c1g; 6c1h; 5t0x; 1x02; 2jzi; 2k0e; 7l8v; 2kne; 1up5; 2m3s; 2ll7; 4djc; 5tp6; 6e2f; 2kdu; 2n8j; 2m55; 2mg5; 2n27; 2lv6; 6y94; 6zbi; 2m0j; 6y95; 3g43; 7yv9; 2mgu; 1nwd; 2m0k; 1wrz; 2o5g; 3sjq; 7tzc; 2k0j; 6mud; 6tv7; 1g4y; 4l79; 5jqa; 5jth; 1qx5; 6u3a; 1xf…
					transient receptor potential cation channel subfamily v member 6	polypeptide(L)		3.28603	2	6e2g; 6e2f	2	70	2l7l; 1mux; 6feh; 5j8h; 5dow; 1prw; 6feg; 7nqc; 1cff; 1ckk; 6e2g; 6o20; 5oeo; 6gdk; 2o60; 1sy9; 4byf; 6but; 6c1d; 2ll6; 6c1g; 6c1h; 5t0x; 1x02; 2jzi; 2k0e; 7l8v; 2kne; 1up5; 2m3s; 2ll7; 4djc; 5tp6; 6e2f; 2kdu; 2n8j; 2m55; 2mg5; 2n27; 2lv6; 6y94; 6zbi; 2m0j; 3g43; 7yv9; 2mgu; 1nwd; 2m0k; 1wrz; 2o5g; 3sjq; 7tzc; 2k0j; 6mud; 6tv7; 1g4y; 4l79; 5jqa; 5jth; 6u3a; 1xfz; 1xfy; 6b8n; 6b8q; 6b8p; 4j9y; 5gg…	77	2l7l; 1mux; 6feh; 5j8h; 5dow; 1prw; 6feg; 7nqc; 1cfc; 1cfd; 1cff; 1ckk; 6e2g; 6o20; 5oeo; 1dmo; 5tp5; 6gdk; 2o60; 1sy9; 4byf; 6but; 6c1d; 2ll6; 6c1g; 6c1h; 5t0x; 1x02; 2jzi; 2k0e; 7l8v; 2kne; 1up5; 2m3s; 2ll7; 4djc; 5tp6; 6e2f; 2kdu; 2n8j; 2m55; 2mg5; 2n27; 2lv6; 6y94; 6zbi; 2m0j; 6y95; 3g43; 7yv9; 2mgu; 1nwd; 2m0k; 1wrz; 2o5g; 3sjq; 7tzc; 2k0j; 6mud; 6tv7; 1g4y; 4l79; 5jqa; 5jth; 1qx5; 6u3a; 1xf…
					magnesium ion	bound	MG	1.90252	2	6b8q; 6b8p	2	70	2l7l; 1mux; 6feh; 5j8h; 5dow; 1prw; 6feg; 7nqc; 1cff; 1ckk; 6e2g; 6o20; 5oeo; 6gdk; 2o60; 1sy9; 4byf; 6but; 6c1d; 2ll6; 6c1g; 6c1h; 5t0x; 1x02; 2jzi; 2k0e; 7l8v; 2kne; 1up5; 2m3s; 2ll7; 4djc; 5tp6; 6e2f; 2kdu; 2n8j; 2m55; 2mg5; 2n27; 2lv6; 6y94; 6zbi; 2m0j; 3g43; 7yv9; 2mgu; 1nwd; 2m0k; 1wrz; 2o5g; 3sjq; 7tzc; 2k0j; 6mud; 6tv7; 1g4y; 4l79; 5jqa; 5jth; 6u3a; 1xfz; 1xfy; 6b8n; 6b8q; 6b8p; 4j9y; 5gg…	77	2l7l; 1mux; 6feh; 5j8h; 5dow; 1prw; 6feg; 7nqc; 1cfc; 1cfd; 1cff; 1ckk; 6e2g; 6o20; 5oeo; 1dmo; 5tp5; 6gdk; 2o60; 1sy9; 4byf; 6but; 6c1d; 2ll6; 6c1g; 6c1h; 5t0x; 1x02; 2jzi; 2k0e; 7l8v; 2kne; 1up5; 2m3s; 2ll7; 4djc; 5tp6; 6e2f; 2kdu; 2n8j; 2m55; 2mg5; 2n27; 2lv6; 6y94; 6zbi; 2m0j; 6y95; 3g43; 7yv9; 2mgu; 1nwd; 2m0k; 1wrz; 2o5g; 3sjq; 7tzc; 2k0j; 6mud; 6tv7; 1g4y; 4l79; 5jqa; 5jth; 1qx5; 6u3a; 1xf…
					unconventional myosin-va	polypeptide(L)		2.77644	1	7yv9	1	70	2l7l; 1mux; 6feh; 5j8h; 5dow; 1prw; 6feg; 7nqc; 1cff; 1ckk; 6e2g; 6o20; 5oeo; 6gdk; 2o60; 1sy9; 4byf; 6but; 6c1d; 2ll6; 6c1g; 6c1h; 5t0x; 1x02; 2jzi; 2k0e; 7l8v; 2kne; 1up5; 2m3s; 2ll7; 4djc; 5tp6; 6e2f; 2kdu; 2n8j; 2m55; 2mg5; 2n27; 2lv6; 6y94; 6zbi; 2m0j; 3g43; 7yv9; 2mgu; 1nwd; 2m0k; 1wrz; 2o5g; 3sjq; 7tzc; 2k0j; 6mud; 6tv7; 1g4y; 4l79; 5jqa; 5jth; 6u3a; 1xfz; 1xfy; 6b8n; 6b8q; 6b8p; 4j9y; 5gg…	77	2l7l; 1mux; 6feh; 5j8h; 5dow; 1prw; 6feg; 7nqc; 1cfc; 1cfd; 1cff; 1ckk; 6e2g; 6o20; 5oeo; 1dmo; 5tp5; 6gdk; 2o60; 1sy9; 4byf; 6but; 6c1d; 2ll6; 6c1g; 6c1h; 5t0x; 1x02; 2jzi; 2k0e; 7l8v; 2kne; 1up5; 2m3s; 2ll7; 4djc; 5tp6; 6e2f; 2kdu; 2n8j; 2m55; 2mg5; 2n27; 2lv6; 6y94; 6zbi; 2m0j; 6y95; 3g43; 7yv9; 2mgu; 1nwd; 2m0k; 1wrz; 2o5g; 3sjq; 7tzc; 2k0j; 6mud; 6tv7; 1g4y; 4l79; 5jqa; 5jth; 1qx5; 6u3a; 1xf…
					isopropyl alcohol	bound	IPA	6.74307	1	4djc	1	70	2l7l; 1mux; 6feh; 5j8h; 5dow; 1prw; 6feg; 7nqc; 1cff; 1ckk; 6e2g; 6o20; 5oeo; 6gdk; 2o60; 1sy9; 4byf; 6but; 6c1d; 2ll6; 6c1g; 6c1h; 5t0x; 1x02; 2jzi; 2k0e; 7l8v; 2kne; 1up5; 2m3s; 2ll7; 4djc; 5tp6; 6e2f; 2kdu; 2n8j; 2m55; 2mg5; 2n27; 2lv6; 6y94; 6zbi; 2m0j; 3g43; 7yv9; 2mgu; 1nwd; 2m0k; 1wrz; 2o5g; 3sjq; 7tzc; 2k0j; 6mud; 6tv7; 1g4y; 4l79; 5jqa; 5jth; 6u3a; 1xfz; 1xfy; 6b8n; 6b8q; 6b8p; 4j9y; 5gg…	77	2l7l; 1mux; 6feh; 5j8h; 5dow; 1prw; 6feg; 7nqc; 1cfc; 1cfd; 1cff; 1ckk; 6e2g; 6o20; 5oeo; 1dmo; 5tp5; 6gdk; 2o60; 1sy9; 4byf; 6but; 6c1d; 2ll6; 6c1g; 6c1h; 5t0x; 1x02; 2jzi; 2k0e; 7l8v; 2kne; 1up5; 2m3s; 2ll7; 4djc; 5tp6; 6e2f; 2kdu; 2n8j; 2m55; 2mg5; 2n27; 2lv6; 6y94; 6zbi; 2m0j; 6y95; 3g43; 7yv9; 2mgu; 1nwd; 2m0k; 1wrz; 2o5g; 3sjq; 7tzc; 2k0j; 6mud; 6tv7; 1g4y; 4l79; 5jqa; 5jth; 1qx5; 6u3a; 1xf…
					potassium voltage-gated channel subfamily kqt member 5	polypeptide(L)		7.47613	1	6b8q	1	70	2l7l; 1mux; 6feh; 5j8h; 5dow; 1prw; 6feg; 7nqc; 1cff; 1ckk; 6e2g; 6o20; 5oeo; 6gdk; 2o60; 1sy9; 4byf; 6but; 6c1d; 2ll6; 6c1g; 6c1h; 5t0x; 1x02; 2jzi; 2k0e; 7l8v; 2kne; 1up5; 2m3s; 2ll7; 4djc; 5tp6; 6e2f; 2kdu; 2n8j; 2m55; 2mg5; 2n27; 2lv6; 6y94; 6zbi; 2m0j; 3g43; 7yv9; 2mgu; 1nwd; 2m0k; 1wrz; 2o5g; 3sjq; 7tzc; 2k0j; 6mud; 6tv7; 1g4y; 4l79; 5jqa; 5jth; 6u3a; 1xfz; 1xfy; 6b8n; 6b8q; 6b8p; 4j9y; 5gg…	77	2l7l; 1mux; 6feh; 5j8h; 5dow; 1prw; 6feg; 7nqc; 1cfc; 1cfd; 1cff; 1ckk; 6e2g; 6o20; 5oeo; 1dmo; 5tp5; 6gdk; 2o60; 1sy9; 4byf; 6but; 6c1d; 2ll6; 6c1g; 6c1h; 5t0x; 1x02; 2jzi; 2k0e; 7l8v; 2kne; 1up5; 2m3s; 2ll7; 4djc; 5tp6; 6e2f; 2kdu; 2n8j; 2m55; 2mg5; 2n27; 2lv6; 6y94; 6zbi; 2m0j; 6y95; 3g43; 7yv9; 2mgu; 1nwd; 2m0k; 1wrz; 2o5g; 3sjq; 7tzc; 2k0j; 6mud; 6tv7; 1g4y; 4l79; 5jqa; 5jth; 1qx5; 6u3a; 1xf…
					protein unc-13 homolog a	polypeptide(L)		7.32063	1	2kdu	1	70	2l7l; 1mux; 6feh; 5j8h; 5dow; 1prw; 6feg; 7nqc; 1cff; 1ckk; 6e2g; 6o20; 5oeo; 6gdk; 2o60; 1sy9; 4byf; 6but; 6c1d; 2ll6; 6c1g; 6c1h; 5t0x; 1x02; 2jzi; 2k0e; 7l8v; 2kne; 1up5; 2m3s; 2ll7; 4djc; 5tp6; 6e2f; 2kdu; 2n8j; 2m55; 2mg5; 2n27; 2lv6; 6y94; 6zbi; 2m0j; 3g43; 7yv9; 2mgu; 1nwd; 2m0k; 1wrz; 2o5g; 3sjq; 7tzc; 2k0j; 6mud; 6tv7; 1g4y; 4l79; 5jqa; 5jth; 6u3a; 1xfz; 1xfy; 6b8n; 6b8q; 6b8p; 4j9y; 5gg…	77	2l7l; 1mux; 6feh; 5j8h; 5dow; 1prw; 6feg; 7nqc; 1cfc; 1cfd; 1cff; 1ckk; 6e2g; 6o20; 5oeo; 1dmo; 5tp5; 6gdk; 2o60; 1sy9; 4byf; 6but; 6c1d; 2ll6; 6c1g; 6c1h; 5t0x; 1x02; 2jzi; 2k0e; 7l8v; 2kne; 1up5; 2m3s; 2ll7; 4djc; 5tp6; 6e2f; 2kdu; 2n8j; 2m55; 2mg5; 2n27; 2lv6; 6y94; 6zbi; 2m0j; 6y95; 3g43; 7yv9; 2mgu; 1nwd; 2m0k; 1wrz; 2o5g; 3sjq; 7tzc; 2k0j; 6mud; 6tv7; 1g4y; 4l79; 5jqa; 5jth; 1qx5; 6u3a; 1xf…
			T31P	-5.471	calcium ion	bound	CA	6.68314	20	6feh; 5j8h; 6feg; 6e2g; 6o20; 6gdk; 1sy9; 5t0x; 2jzi; 2k0e; 6e2f; 2kdu; 2m55; 2mgu; 1nwd; 7tzc; 6tv7; 6b8n; 5ggm; 6b8m	20	70	2l7l; 1mux; 6feh; 5j8h; 5dow; 1prw; 6feg; 7nqc; 1cff; 1ckk; 6e2g; 6o20; 5oeo; 6gdk; 2o60; 1sy9; 4byf; 6but; 6c1d; 2ll6; 6c1g; 6c1h; 5t0x; 1x02; 2jzi; 2k0e; 7l8v; 2kne; 1up5; 2m3s; 2ll7; 4djc; 5tp6; 6e2f; 2kdu; 2n8j; 2m55; 2mg5; 2n27; 2lv6; 6y94; 6zbi; 2m0j; 3g43; 7yv9; 2mgu; 1nwd; 2m0k; 1wrz; 2o5g; 3sjq; 7tzc; 2k0j; 6mud; 6tv7; 1g4y; 4l79; 5jqa; 5jth; 6u3a; 1xfz; 1xfy; 6b8n; 6b8q; 6b8p; 4j9y; 5gg…	77	2l7l; 1mux; 6feh; 5j8h; 5dow; 1prw; 6feg; 7nqc; 1cfc; 1cfd; 1cff; 1ckk; 6e2g; 6o20; 5oeo; 1dmo; 5tp5; 6gdk; 2o60; 1sy9; 4byf; 6but; 6c1d; 2ll6; 6c1g; 6c1h; 5t0x; 1x02; 2jzi; 2k0e; 7l8v; 2kne; 1up5; 2m3s; 2ll7; 4djc; 5tp6; 6e2f; 2kdu; 2n8j; 2m55; 2mg5; 2n27; 2lv6; 6y94; 6zbi; 2m0j; 6y95; 3g43; 7yv9; 2mgu; 1nwd; 2m0k; 1wrz; 2o5g; 3sjq; 7tzc; 2k0j; 6mud; 6tv7; 1g4y; 4l79; 5jqa; 5jth; 1qx5; 6u3a; 1xf…
					potassium voltage-gated channel subfamily kqt member 4	polypeptide(L)		6.50984	3	6b8n; 6b8p; 6b8m	3	70	2l7l; 1mux; 6feh; 5j8h; 5dow; 1prw; 6feg; 7nqc; 1cff; 1ckk; 6e2g; 6o20; 5oeo; 6gdk; 2o60; 1sy9; 4byf; 6but; 6c1d; 2ll6; 6c1g; 6c1h; 5t0x; 1x02; 2jzi; 2k0e; 7l8v; 2kne; 1up5; 2m3s; 2ll7; 4djc; 5tp6; 6e2f; 2kdu; 2n8j; 2m55; 2mg5; 2n27; 2lv6; 6y94; 6zbi; 2m0j; 3g43; 7yv9; 2mgu; 1nwd; 2m0k; 1wrz; 2o5g; 3sjq; 7tzc; 2k0j; 6mud; 6tv7; 1g4y; 4l79; 5jqa; 5jth; 6u3a; 1xfz; 1xfy; 6b8n; 6b8q; 6b8p; 4j9y; 5gg…	77	2l7l; 1mux; 6feh; 5j8h; 5dow; 1prw; 6feg; 7nqc; 1cfc; 1cfd; 1cff; 1ckk; 6e2g; 6o20; 5oeo; 1dmo; 5tp5; 6gdk; 2o60; 1sy9; 4byf; 6but; 6c1d; 2ll6; 6c1g; 6c1h; 5t0x; 1x02; 2jzi; 2k0e; 7l8v; 2kne; 1up5; 2m3s; 2ll7; 4djc; 5tp6; 6e2f; 2kdu; 2n8j; 2m55; 2mg5; 2n27; 2lv6; 6y94; 6zbi; 2m0j; 6y95; 3g43; 7yv9; 2mgu; 1nwd; 2m0k; 1wrz; 2o5g; 3sjq; 7tzc; 2k0j; 6mud; 6tv7; 1g4y; 4l79; 5jqa; 5jth; 1qx5; 6u3a; 1xf…
					cyclic nucleotide-gated olfactory channel	polypeptide(L)		4.61418	3	1sy9; 2m0j; 2m0k	3	70	2l7l; 1mux; 6feh; 5j8h; 5dow; 1prw; 6feg; 7nqc; 1cff; 1ckk; 6e2g; 6o20; 5oeo; 6gdk; 2o60; 1sy9; 4byf; 6but; 6c1d; 2ll6; 6c1g; 6c1h; 5t0x; 1x02; 2jzi; 2k0e; 7l8v; 2kne; 1up5; 2m3s; 2ll7; 4djc; 5tp6; 6e2f; 2kdu; 2n8j; 2m55; 2mg5; 2n27; 2lv6; 6y94; 6zbi; 2m0j; 3g43; 7yv9; 2mgu; 1nwd; 2m0k; 1wrz; 2o5g; 3sjq; 7tzc; 2k0j; 6mud; 6tv7; 1g4y; 4l79; 5jqa; 5jth; 6u3a; 1xfz; 1xfy; 6b8n; 6b8q; 6b8p; 4j9y; 5gg…	77	2l7l; 1mux; 6feh; 5j8h; 5dow; 1prw; 6feg; 7nqc; 1cfc; 1cfd; 1cff; 1ckk; 6e2g; 6o20; 5oeo; 1dmo; 5tp5; 6gdk; 2o60; 1sy9; 4byf; 6but; 6c1d; 2ll6; 6c1g; 6c1h; 5t0x; 1x02; 2jzi; 2k0e; 7l8v; 2kne; 1up5; 2m3s; 2ll7; 4djc; 5tp6; 6e2f; 2kdu; 2n8j; 2m55; 2mg5; 2n27; 2lv6; 6y94; 6zbi; 2m0j; 6y95; 3g43; 7yv9; 2mgu; 1nwd; 2m0k; 1wrz; 2o5g; 3sjq; 7tzc; 2k0j; 6mud; 6tv7; 1g4y; 4l79; 5jqa; 5jth; 1qx5; 6u3a; 1xf…
					transient receptor potential cation channel subfamily v member 6	polypeptide(L)		6.13334	2	6e2g; 6e2f	2	70	2l7l; 1mux; 6feh; 5j8h; 5dow; 1prw; 6feg; 7nqc; 1cff; 1ckk; 6e2g; 6o20; 5oeo; 6gdk; 2o60; 1sy9; 4byf; 6but; 6c1d; 2ll6; 6c1g; 6c1h; 5t0x; 1x02; 2jzi; 2k0e; 7l8v; 2kne; 1up5; 2m3s; 2ll7; 4djc; 5tp6; 6e2f; 2kdu; 2n8j; 2m55; 2mg5; 2n27; 2lv6; 6y94; 6zbi; 2m0j; 3g43; 7yv9; 2mgu; 1nwd; 2m0k; 1wrz; 2o5g; 3sjq; 7tzc; 2k0j; 6mud; 6tv7; 1g4y; 4l79; 5jqa; 5jth; 6u3a; 1xfz; 1xfy; 6b8n; 6b8q; 6b8p; 4j9y; 5gg…	77	2l7l; 1mux; 6feh; 5j8h; 5dow; 1prw; 6feg; 7nqc; 1cfc; 1cfd; 1cff; 1ckk; 6e2g; 6o20; 5oeo; 1dmo; 5tp5; 6gdk; 2o60; 1sy9; 4byf; 6but; 6c1d; 2ll6; 6c1g; 6c1h; 5t0x; 1x02; 2jzi; 2k0e; 7l8v; 2kne; 1up5; 2m3s; 2ll7; 4djc; 5tp6; 6e2f; 2kdu; 2n8j; 2m55; 2mg5; 2n27; 2lv6; 6y94; 6zbi; 2m0j; 6y95; 3g43; 7yv9; 2mgu; 1nwd; 2m0k; 1wrz; 2o5g; 3sjq; 7tzc; 2k0j; 6mud; 6tv7; 1g4y; 4l79; 5jqa; 5jth; 1qx5; 6u3a; 1xf…
					eukaryotic elongation factor 2 kinase	polypeptide(L)		7.39162	1	5j8h	1	70	2l7l; 1mux; 6feh; 5j8h; 5dow; 1prw; 6feg; 7nqc; 1cff; 1ckk; 6e2g; 6o20; 5oeo; 6gdk; 2o60; 1sy9; 4byf; 6but; 6c1d; 2ll6; 6c1g; 6c1h; 5t0x; 1x02; 2jzi; 2k0e; 7l8v; 2kne; 1up5; 2m3s; 2ll7; 4djc; 5tp6; 6e2f; 2kdu; 2n8j; 2m55; 2mg5; 2n27; 2lv6; 6y94; 6zbi; 2m0j; 3g43; 7yv9; 2mgu; 1nwd; 2m0k; 1wrz; 2o5g; 3sjq; 7tzc; 2k0j; 6mud; 6tv7; 1g4y; 4l79; 5jqa; 5jth; 6u3a; 1xfz; 1xfy; 6b8n; 6b8q; 6b8p; 4j9y; 5gg…	77	2l7l; 1mux; 6feh; 5j8h; 5dow; 1prw; 6feg; 7nqc; 1cfc; 1cfd; 1cff; 1ckk; 6e2g; 6o20; 5oeo; 1dmo; 5tp5; 6gdk; 2o60; 1sy9; 4byf; 6but; 6c1d; 2ll6; 6c1g; 6c1h; 5t0x; 1x02; 2jzi; 2k0e; 7l8v; 2kne; 1up5; 2m3s; 2ll7; 4djc; 5tp6; 6e2f; 2kdu; 2n8j; 2m55; 2mg5; 2n27; 2lv6; 6y94; 6zbi; 2m0j; 6y95; 3g43; 7yv9; 2mgu; 1nwd; 2m0k; 1wrz; 2o5g; 3sjq; 7tzc; 2k0j; 6mud; 6tv7; 1g4y; 4l79; 5jqa; 5jth; 1qx5; 6u3a; 1xf…
					potassium voltage-gated channel subfamily kqt member 5	polypeptide(L)		7.16218	1	6b8q	1	70	2l7l; 1mux; 6feh; 5j8h; 5dow; 1prw; 6feg; 7nqc; 1cff; 1ckk; 6e2g; 6o20; 5oeo; 6gdk; 2o60; 1sy9; 4byf; 6but; 6c1d; 2ll6; 6c1g; 6c1h; 5t0x; 1x02; 2jzi; 2k0e; 7l8v; 2kne; 1up5; 2m3s; 2ll7; 4djc; 5tp6; 6e2f; 2kdu; 2n8j; 2m55; 2mg5; 2n27; 2lv6; 6y94; 6zbi; 2m0j; 3g43; 7yv9; 2mgu; 1nwd; 2m0k; 1wrz; 2o5g; 3sjq; 7tzc; 2k0j; 6mud; 6tv7; 1g4y; 4l79; 5jqa; 5jth; 6u3a; 1xfz; 1xfy; 6b8n; 6b8q; 6b8p; 4j9y; 5gg…	77	2l7l; 1mux; 6feh; 5j8h; 5dow; 1prw; 6feg; 7nqc; 1cfc; 1cfd; 1cff; 1ckk; 6e2g; 6o20; 5oeo; 1dmo; 5tp5; 6gdk; 2o60; 1sy9; 4byf; 6but; 6c1d; 2ll6; 6c1g; 6c1h; 5t0x; 1x02; 2jzi; 2k0e; 7l8v; 2kne; 1up5; 2m3s; 2ll7; 4djc; 5tp6; 6e2f; 2kdu; 2n8j; 2m55; 2mg5; 2n27; 2lv6; 6y94; 6zbi; 2m0j; 6y95; 3g43; 7yv9; 2mgu; 1nwd; 2m0k; 1wrz; 2o5g; 3sjq; 7tzc; 2k0j; 6mud; 6tv7; 1g4y; 4l79; 5jqa; 5jth; 1qx5; 6u3a; 1xf…
					protein phosphatase 3 catalytic subunit alpha	polypeptide(L)		4.71671	1	2jzi	1	70	2l7l; 1mux; 6feh; 5j8h; 5dow; 1prw; 6feg; 7nqc; 1cff; 1ckk; 6e2g; 6o20; 5oeo; 6gdk; 2o60; 1sy9; 4byf; 6but; 6c1d; 2ll6; 6c1g; 6c1h; 5t0x; 1x02; 2jzi; 2k0e; 7l8v; 2kne; 1up5; 2m3s; 2ll7; 4djc; 5tp6; 6e2f; 2kdu; 2n8j; 2m55; 2mg5; 2n27; 2lv6; 6y94; 6zbi; 2m0j; 3g43; 7yv9; 2mgu; 1nwd; 2m0k; 1wrz; 2o5g; 3sjq; 7tzc; 2k0j; 6mud; 6tv7; 1g4y; 4l79; 5jqa; 5jth; 6u3a; 1xfz; 1xfy; 6b8n; 6b8q; 6b8p; 4j9y; 5gg…	77	2l7l; 1mux; 6feh; 5j8h; 5dow; 1prw; 6feg; 7nqc; 1cfc; 1cfd; 1cff; 1ckk; 6e2g; 6o20; 5oeo; 1dmo; 5tp5; 6gdk; 2o60; 1sy9; 4byf; 6but; 6c1d; 2ll6; 6c1g; 6c1h; 5t0x; 1x02; 2jzi; 2k0e; 7l8v; 2kne; 1up5; 2m3s; 2ll7; 4djc; 5tp6; 6e2f; 2kdu; 2n8j; 2m55; 2mg5; 2n27; 2lv6; 6y94; 6zbi; 2m0j; 6y95; 3g43; 7yv9; 2mgu; 1nwd; 2m0k; 1wrz; 2o5g; 3sjq; 7tzc; 2k0j; 6mud; 6tv7; 1g4y; 4l79; 5jqa; 5jth; 1qx5; 6u3a; 1xf…
					protein unc-13 homolog a	polypeptide(L)		3.4358	1	2kdu	1	70	2l7l; 1mux; 6feh; 5j8h; 5dow; 1prw; 6feg; 7nqc; 1cff; 1ckk; 6e2g; 6o20; 5oeo; 6gdk; 2o60; 1sy9; 4byf; 6but; 6c1d; 2ll6; 6c1g; 6c1h; 5t0x; 1x02; 2jzi; 2k0e; 7l8v; 2kne; 1up5; 2m3s; 2ll7; 4djc; 5tp6; 6e2f; 2kdu; 2n8j; 2m55; 2mg5; 2n27; 2lv6; 6y94; 6zbi; 2m0j; 3g43; 7yv9; 2mgu; 1nwd; 2m0k; 1wrz; 2o5g; 3sjq; 7tzc; 2k0j; 6mud; 6tv7; 1g4y; 4l79; 5jqa; 5jth; 6u3a; 1xfz; 1xfy; 6b8n; 6b8q; 6b8p; 4j9y; 5gg…	77	2l7l; 1mux; 6feh; 5j8h; 5dow; 1prw; 6feg; 7nqc; 1cfc; 1cfd; 1cff; 1ckk; 6e2g; 6o20; 5oeo; 1dmo; 5tp5; 6gdk; 2o60; 1sy9; 4byf; 6but; 6c1d; 2ll6; 6c1g; 6c1h; 5t0x; 1x02; 2jzi; 2k0e; 7l8v; 2kne; 1up5; 2m3s; 2ll7; 4djc; 5tp6; 6e2f; 2kdu; 2n8j; 2m55; 2mg5; 2n27; 2lv6; 6y94; 6zbi; 2m0j; 6y95; 3g43; 7yv9; 2mgu; 1nwd; 2m0k; 1wrz; 2o5g; 3sjq; 7tzc; 2k0j; 6mud; 6tv7; 1g4y; 4l79; 5jqa; 5jth; 1qx5; 6u3a; 1xf…
					transient receptor potential cation channel subfamily v member 5	polypeptide(L)		7.77275	1	6o20	1	70	2l7l; 1mux; 6feh; 5j8h; 5dow; 1prw; 6feg; 7nqc; 1cff; 1ckk; 6e2g; 6o20; 5oeo; 6gdk; 2o60; 1sy9; 4byf; 6but; 6c1d; 2ll6; 6c1g; 6c1h; 5t0x; 1x02; 2jzi; 2k0e; 7l8v; 2kne; 1up5; 2m3s; 2ll7; 4djc; 5tp6; 6e2f; 2kdu; 2n8j; 2m55; 2mg5; 2n27; 2lv6; 6y94; 6zbi; 2m0j; 3g43; 7yv9; 2mgu; 1nwd; 2m0k; 1wrz; 2o5g; 3sjq; 7tzc; 2k0j; 6mud; 6tv7; 1g4y; 4l79; 5jqa; 5jth; 6u3a; 1xfz; 1xfy; 6b8n; 6b8q; 6b8p; 4j9y; 5gg…	77	2l7l; 1mux; 6feh; 5j8h; 5dow; 1prw; 6feg; 7nqc; 1cfc; 1cfd; 1cff; 1ckk; 6e2g; 6o20; 5oeo; 1dmo; 5tp5; 6gdk; 2o60; 1sy9; 4byf; 6but; 6c1d; 2ll6; 6c1g; 6c1h; 5t0x; 1x02; 2jzi; 2k0e; 7l8v; 2kne; 1up5; 2m3s; 2ll7; 4djc; 5tp6; 6e2f; 2kdu; 2n8j; 2m55; 2mg5; 2n27; 2lv6; 6y94; 6zbi; 2m0j; 6y95; 3g43; 7yv9; 2mgu; 1nwd; 2m0k; 1wrz; 2o5g; 3sjq; 7tzc; 2k0j; 6mud; 6tv7; 1g4y; 4l79; 5jqa; 5jth; 1qx5; 6u3a; 1xf…
					(6e)-n-(4-hydroxy-3-methoxybenzyl)-8-methylnon-6-enamide	bound	4DY	5.38239	1	2n27	1	70	2l7l; 1mux; 6feh; 5j8h; 5dow; 1prw; 6feg; 7nqc; 1cff; 1ckk; 6e2g; 6o20; 5oeo; 6gdk; 2o60; 1sy9; 4byf; 6but; 6c1d; 2ll6; 6c1g; 6c1h; 5t0x; 1x02; 2jzi; 2k0e; 7l8v; 2kne; 1up5; 2m3s; 2ll7; 4djc; 5tp6; 6e2f; 2kdu; 2n8j; 2m55; 2mg5; 2n27; 2lv6; 6y94; 6zbi; 2m0j; 3g43; 7yv9; 2mgu; 1nwd; 2m0k; 1wrz; 2o5g; 3sjq; 7tzc; 2k0j; 6mud; 6tv7; 1g4y; 4l79; 5jqa; 5jth; 6u3a; 1xfz; 1xfy; 6b8n; 6b8q; 6b8p; 4j9y; 5gg…	77	2l7l; 1mux; 6feh; 5j8h; 5dow; 1prw; 6feg; 7nqc; 1cfc; 1cfd; 1cff; 1ckk; 6e2g; 6o20; 5oeo; 1dmo; 5tp5; 6gdk; 2o60; 1sy9; 4byf; 6but; 6c1d; 2ll6; 6c1g; 6c1h; 5t0x; 1x02; 2jzi; 2k0e; 7l8v; 2kne; 1up5; 2m3s; 2ll7; 4djc; 5tp6; 6e2f; 2kdu; 2n8j; 2m55; 2mg5; 2n27; 2lv6; 6y94; 6zbi; 2m0j; 6y95; 3g43; 7yv9; 2mgu; 1nwd; 2m0k; 1wrz; 2o5g; 3sjq; 7tzc; 2k0j; 6mud; 6tv7; 1g4y; 4l79; 5jqa; 5jth; 1qx5; 6u3a; 1xf…
					[(2~{z},6~{z})-3,7,11-trimethyldodeca-2,6-dienyl] 3-[2,5-bis(oxidanylidene)pyrrolidin-1-yl]propanoate	bound	ULW	6.14183	1	7nqc	1	70	2l7l; 1mux; 6feh; 5j8h; 5dow; 1prw; 6feg; 7nqc; 1cff; 1ckk; 6e2g; 6o20; 5oeo; 6gdk; 2o60; 1sy9; 4byf; 6but; 6c1d; 2ll6; 6c1g; 6c1h; 5t0x; 1x02; 2jzi; 2k0e; 7l8v; 2kne; 1up5; 2m3s; 2ll7; 4djc; 5tp6; 6e2f; 2kdu; 2n8j; 2m55; 2mg5; 2n27; 2lv6; 6y94; 6zbi; 2m0j; 3g43; 7yv9; 2mgu; 1nwd; 2m0k; 1wrz; 2o5g; 3sjq; 7tzc; 2k0j; 6mud; 6tv7; 1g4y; 4l79; 5jqa; 5jth; 6u3a; 1xfz; 1xfy; 6b8n; 6b8q; 6b8p; 4j9y; 5gg…	77	2l7l; 1mux; 6feh; 5j8h; 5dow; 1prw; 6feg; 7nqc; 1cfc; 1cfd; 1cff; 1ckk; 6e2g; 6o20; 5oeo; 1dmo; 5tp5; 6gdk; 2o60; 1sy9; 4byf; 6but; 6c1d; 2ll6; 6c1g; 6c1h; 5t0x; 1x02; 2jzi; 2k0e; 7l8v; 2kne; 1up5; 2m3s; 2ll7; 4djc; 5tp6; 6e2f; 2kdu; 2n8j; 2m55; 2mg5; 2n27; 2lv6; 6y94; 6zbi; 2m0j; 6y95; 3g43; 7yv9; 2mgu; 1nwd; 2m0k; 1wrz; 2o5g; 3sjq; 7tzc; 2k0j; 6mud; 6tv7; 1g4y; 4l79; 5jqa; 5jth; 1qx5; 6u3a; 1xf…
					alpha-synuclein	polypeptide(L)		7.154	1	2m55	1	70	2l7l; 1mux; 6feh; 5j8h; 5dow; 1prw; 6feg; 7nqc; 1cff; 1ckk; 6e2g; 6o20; 5oeo; 6gdk; 2o60; 1sy9; 4byf; 6but; 6c1d; 2ll6; 6c1g; 6c1h; 5t0x; 1x02; 2jzi; 2k0e; 7l8v; 2kne; 1up5; 2m3s; 2ll7; 4djc; 5tp6; 6e2f; 2kdu; 2n8j; 2m55; 2mg5; 2n27; 2lv6; 6y94; 6zbi; 2m0j; 3g43; 7yv9; 2mgu; 1nwd; 2m0k; 1wrz; 2o5g; 3sjq; 7tzc; 2k0j; 6mud; 6tv7; 1g4y; 4l79; 5jqa; 5jth; 6u3a; 1xfz; 1xfy; 6b8n; 6b8q; 6b8p; 4j9y; 5gg…	77	2l7l; 1mux; 6feh; 5j8h; 5dow; 1prw; 6feg; 7nqc; 1cfc; 1cfd; 1cff; 1ckk; 6e2g; 6o20; 5oeo; 1dmo; 5tp5; 6gdk; 2o60; 1sy9; 4byf; 6but; 6c1d; 2ll6; 6c1g; 6c1h; 5t0x; 1x02; 2jzi; 2k0e; 7l8v; 2kne; 1up5; 2m3s; 2ll7; 4djc; 5tp6; 6e2f; 2kdu; 2n8j; 2m55; 2mg5; 2n27; 2lv6; 6y94; 6zbi; 2m0j; 6y95; 3g43; 7yv9; 2mgu; 1nwd; 2m0k; 1wrz; 2o5g; 3sjq; 7tzc; 2k0j; 6mud; 6tv7; 1g4y; 4l79; 5jqa; 5jth; 1qx5; 6u3a; 1xf…
					calcium/calmodulin-dependent protein kinase kinase 1	polypeptide(L)		6.28811	1	1ckk	1	70	2l7l; 1mux; 6feh; 5j8h; 5dow; 1prw; 6feg; 7nqc; 1cff; 1ckk; 6e2g; 6o20; 5oeo; 6gdk; 2o60; 1sy9; 4byf; 6but; 6c1d; 2ll6; 6c1g; 6c1h; 5t0x; 1x02; 2jzi; 2k0e; 7l8v; 2kne; 1up5; 2m3s; 2ll7; 4djc; 5tp6; 6e2f; 2kdu; 2n8j; 2m55; 2mg5; 2n27; 2lv6; 6y94; 6zbi; 2m0j; 3g43; 7yv9; 2mgu; 1nwd; 2m0k; 1wrz; 2o5g; 3sjq; 7tzc; 2k0j; 6mud; 6tv7; 1g4y; 4l79; 5jqa; 5jth; 6u3a; 1xfz; 1xfy; 6b8n; 6b8q; 6b8p; 4j9y; 5gg…	77	2l7l; 1mux; 6feh; 5j8h; 5dow; 1prw; 6feg; 7nqc; 1cfc; 1cfd; 1cff; 1ckk; 6e2g; 6o20; 5oeo; 1dmo; 5tp5; 6gdk; 2o60; 1sy9; 4byf; 6but; 6c1d; 2ll6; 6c1g; 6c1h; 5t0x; 1x02; 2jzi; 2k0e; 7l8v; 2kne; 1up5; 2m3s; 2ll7; 4djc; 5tp6; 6e2f; 2kdu; 2n8j; 2m55; 2mg5; 2n27; 2lv6; 6y94; 6zbi; 2m0j; 6y95; 3g43; 7yv9; 2mgu; 1nwd; 2m0k; 1wrz; 2o5g; 3sjq; 7tzc; 2k0j; 6mud; 6tv7; 1g4y; 4l79; 5jqa; 5jth; 1qx5; 6u3a; 1xf…
					estrogen receptor	polypeptide(L)		7.35845	1	5t0x	1	70	2l7l; 1mux; 6feh; 5j8h; 5dow; 1prw; 6feg; 7nqc; 1cff; 1ckk; 6e2g; 6o20; 5oeo; 6gdk; 2o60; 1sy9; 4byf; 6but; 6c1d; 2ll6; 6c1g; 6c1h; 5t0x; 1x02; 2jzi; 2k0e; 7l8v; 2kne; 1up5; 2m3s; 2ll7; 4djc; 5tp6; 6e2f; 2kdu; 2n8j; 2m55; 2mg5; 2n27; 2lv6; 6y94; 6zbi; 2m0j; 3g43; 7yv9; 2mgu; 1nwd; 2m0k; 1wrz; 2o5g; 3sjq; 7tzc; 2k0j; 6mud; 6tv7; 1g4y; 4l79; 5jqa; 5jth; 6u3a; 1xfz; 1xfy; 6b8n; 6b8q; 6b8p; 4j9y; 5gg…	77	2l7l; 1mux; 6feh; 5j8h; 5dow; 1prw; 6feg; 7nqc; 1cfc; 1cfd; 1cff; 1ckk; 6e2g; 6o20; 5oeo; 1dmo; 5tp5; 6gdk; 2o60; 1sy9; 4byf; 6but; 6c1d; 2ll6; 6c1g; 6c1h; 5t0x; 1x02; 2jzi; 2k0e; 7l8v; 2kne; 1up5; 2m3s; 2ll7; 4djc; 5tp6; 6e2f; 2kdu; 2n8j; 2m55; 2mg5; 2n27; 2lv6; 6y94; 6zbi; 2m0j; 6y95; 3g43; 7yv9; 2mgu; 1nwd; 2m0k; 1wrz; 2o5g; 3sjq; 7tzc; 2k0j; 6mud; 6tv7; 1g4y; 4l79; 5jqa; 5jth; 1qx5; 6u3a; 1xf…
					glutamate decarboxylase	polypeptide(L)		7.96944	1	1nwd	1	70	2l7l; 1mux; 6feh; 5j8h; 5dow; 1prw; 6feg; 7nqc; 1cff; 1ckk; 6e2g; 6o20; 5oeo; 6gdk; 2o60; 1sy9; 4byf; 6but; 6c1d; 2ll6; 6c1g; 6c1h; 5t0x; 1x02; 2jzi; 2k0e; 7l8v; 2kne; 1up5; 2m3s; 2ll7; 4djc; 5tp6; 6e2f; 2kdu; 2n8j; 2m55; 2mg5; 2n27; 2lv6; 6y94; 6zbi; 2m0j; 3g43; 7yv9; 2mgu; 1nwd; 2m0k; 1wrz; 2o5g; 3sjq; 7tzc; 2k0j; 6mud; 6tv7; 1g4y; 4l79; 5jqa; 5jth; 6u3a; 1xfz; 1xfy; 6b8n; 6b8q; 6b8p; 4j9y; 5gg…	77	2l7l; 1mux; 6feh; 5j8h; 5dow; 1prw; 6feg; 7nqc; 1cfc; 1cfd; 1cff; 1ckk; 6e2g; 6o20; 5oeo; 1dmo; 5tp5; 6gdk; 2o60; 1sy9; 4byf; 6but; 6c1d; 2ll6; 6c1g; 6c1h; 5t0x; 1x02; 2jzi; 2k0e; 7l8v; 2kne; 1up5; 2m3s; 2ll7; 4djc; 5tp6; 6e2f; 2kdu; 2n8j; 2m55; 2mg5; 2n27; 2lv6; 6y94; 6zbi; 2m0j; 6y95; 3g43; 7yv9; 2mgu; 1nwd; 2m0k; 1wrz; 2o5g; 3sjq; 7tzc; 2k0j; 6mud; 6tv7; 1g4y; 4l79; 5jqa; 5jth; 1qx5; 6u3a; 1xf…
					matrix protein p17	polypeptide(L)		7.85426	1	2mgu	1	70	2l7l; 1mux; 6feh; 5j8h; 5dow; 1prw; 6feg; 7nqc; 1cff; 1ckk; 6e2g; 6o20; 5oeo; 6gdk; 2o60; 1sy9; 4byf; 6but; 6c1d; 2ll6; 6c1g; 6c1h; 5t0x; 1x02; 2jzi; 2k0e; 7l8v; 2kne; 1up5; 2m3s; 2ll7; 4djc; 5tp6; 6e2f; 2kdu; 2n8j; 2m55; 2mg5; 2n27; 2lv6; 6y94; 6zbi; 2m0j; 3g43; 7yv9; 2mgu; 1nwd; 2m0k; 1wrz; 2o5g; 3sjq; 7tzc; 2k0j; 6mud; 6tv7; 1g4y; 4l79; 5jqa; 5jth; 6u3a; 1xfz; 1xfy; 6b8n; 6b8q; 6b8p; 4j9y; 5gg…	77	2l7l; 1mux; 6feh; 5j8h; 5dow; 1prw; 6feg; 7nqc; 1cfc; 1cfd; 1cff; 1ckk; 6e2g; 6o20; 5oeo; 1dmo; 5tp5; 6gdk; 2o60; 1sy9; 4byf; 6but; 6c1d; 2ll6; 6c1g; 6c1h; 5t0x; 1x02; 2jzi; 2k0e; 7l8v; 2kne; 1up5; 2m3s; 2ll7; 4djc; 5tp6; 6e2f; 2kdu; 2n8j; 2m55; 2mg5; 2n27; 2lv6; 6y94; 6zbi; 2m0j; 6y95; 3g43; 7yv9; 2mgu; 1nwd; 2m0k; 1wrz; 2o5g; 3sjq; 7tzc; 2k0j; 6mud; 6tv7; 1g4y; 4l79; 5jqa; 5jth; 1qx5; 6u3a; 1xf…
					n-(6-aminohexyl)-5-chloro-1-naphthalenesulfonamide	bound	WW7	6.22638	1	1mux	1	70	2l7l; 1mux; 6feh; 5j8h; 5dow; 1prw; 6feg; 7nqc; 1cff; 1ckk; 6e2g; 6o20; 5oeo; 6gdk; 2o60; 1sy9; 4byf; 6but; 6c1d; 2ll6; 6c1g; 6c1h; 5t0x; 1x02; 2jzi; 2k0e; 7l8v; 2kne; 1up5; 2m3s; 2ll7; 4djc; 5tp6; 6e2f; 2kdu; 2n8j; 2m55; 2mg5; 2n27; 2lv6; 6y94; 6zbi; 2m0j; 3g43; 7yv9; 2mgu; 1nwd; 2m0k; 1wrz; 2o5g; 3sjq; 7tzc; 2k0j; 6mud; 6tv7; 1g4y; 4l79; 5jqa; 5jth; 6u3a; 1xfz; 1xfy; 6b8n; 6b8q; 6b8p; 4j9y; 5gg…	77	2l7l; 1mux; 6feh; 5j8h; 5dow; 1prw; 6feg; 7nqc; 1cfc; 1cfd; 1cff; 1ckk; 6e2g; 6o20; 5oeo; 1dmo; 5tp5; 6gdk; 2o60; 1sy9; 4byf; 6but; 6c1d; 2ll6; 6c1g; 6c1h; 5t0x; 1x02; 2jzi; 2k0e; 7l8v; 2kne; 1up5; 2m3s; 2ll7; 4djc; 5tp6; 6e2f; 2kdu; 2n8j; 2m55; 2mg5; 2n27; 2lv6; 6y94; 6zbi; 2m0j; 6y95; 3g43; 7yv9; 2mgu; 1nwd; 2m0k; 1wrz; 2o5g; 3sjq; 7tzc; 2k0j; 6mud; 6tv7; 1g4y; 4l79; 5jqa; 5jth; 1qx5; 6u3a; 1xf…
					nitric oxide synthase, inducible	polypeptide(L)		7.89062	1	2ll6	1	70	2l7l; 1mux; 6feh; 5j8h; 5dow; 1prw; 6feg; 7nqc; 1cff; 1ckk; 6e2g; 6o20; 5oeo; 6gdk; 2o60; 1sy9; 4byf; 6but; 6c1d; 2ll6; 6c1g; 6c1h; 5t0x; 1x02; 2jzi; 2k0e; 7l8v; 2kne; 1up5; 2m3s; 2ll7; 4djc; 5tp6; 6e2f; 2kdu; 2n8j; 2m55; 2mg5; 2n27; 2lv6; 6y94; 6zbi; 2m0j; 3g43; 7yv9; 2mgu; 1nwd; 2m0k; 1wrz; 2o5g; 3sjq; 7tzc; 2k0j; 6mud; 6tv7; 1g4y; 4l79; 5jqa; 5jth; 6u3a; 1xfz; 1xfy; 6b8n; 6b8q; 6b8p; 4j9y; 5gg…	77	2l7l; 1mux; 6feh; 5j8h; 5dow; 1prw; 6feg; 7nqc; 1cfc; 1cfd; 1cff; 1ckk; 6e2g; 6o20; 5oeo; 1dmo; 5tp5; 6gdk; 2o60; 1sy9; 4byf; 6but; 6c1d; 2ll6; 6c1g; 6c1h; 5t0x; 1x02; 2jzi; 2k0e; 7l8v; 2kne; 1up5; 2m3s; 2ll7; 4djc; 5tp6; 6e2f; 2kdu; 2n8j; 2m55; 2mg5; 2n27; 2lv6; 6y94; 6zbi; 2m0j; 6y95; 3g43; 7yv9; 2mgu; 1nwd; 2m0k; 1wrz; 2o5g; 3sjq; 7tzc; 2k0j; 6mud; 6tv7; 1g4y; 4l79; 5jqa; 5jth; 1qx5; 6u3a; 1xf…
					plasma membrane calcium-transporting atpase 4	polypeptide(L)		7.32677	1	2kne	1	70	2l7l; 1mux; 6feh; 5j8h; 5dow; 1prw; 6feg; 7nqc; 1cff; 1ckk; 6e2g; 6o20; 5oeo; 6gdk; 2o60; 1sy9; 4byf; 6but; 6c1d; 2ll6; 6c1g; 6c1h; 5t0x; 1x02; 2jzi; 2k0e; 7l8v; 2kne; 1up5; 2m3s; 2ll7; 4djc; 5tp6; 6e2f; 2kdu; 2n8j; 2m55; 2mg5; 2n27; 2lv6; 6y94; 6zbi; 2m0j; 3g43; 7yv9; 2mgu; 1nwd; 2m0k; 1wrz; 2o5g; 3sjq; 7tzc; 2k0j; 6mud; 6tv7; 1g4y; 4l79; 5jqa; 5jth; 6u3a; 1xfz; 1xfy; 6b8n; 6b8q; 6b8p; 4j9y; 5gg…	77	2l7l; 1mux; 6feh; 5j8h; 5dow; 1prw; 6feg; 7nqc; 1cfc; 1cfd; 1cff; 1ckk; 6e2g; 6o20; 5oeo; 1dmo; 5tp5; 6gdk; 2o60; 1sy9; 4byf; 6but; 6c1d; 2ll6; 6c1g; 6c1h; 5t0x; 1x02; 2jzi; 2k0e; 7l8v; 2kne; 1up5; 2m3s; 2ll7; 4djc; 5tp6; 6e2f; 2kdu; 2n8j; 2m55; 2mg5; 2n27; 2lv6; 6y94; 6zbi; 2m0j; 6y95; 3g43; 7yv9; 2mgu; 1nwd; 2m0k; 1wrz; 2o5g; 3sjq; 7tzc; 2k0j; 6mud; 6tv7; 1g4y; 4l79; 5jqa; 5jth; 1qx5; 6u3a; 1xf…
					potassium voltage-gated channel subfamily kqt member 2	polypeptide(L)		7.77497	1	6feh	1	70	2l7l; 1mux; 6feh; 5j8h; 5dow; 1prw; 6feg; 7nqc; 1cff; 1ckk; 6e2g; 6o20; 5oeo; 6gdk; 2o60; 1sy9; 4byf; 6but; 6c1d; 2ll6; 6c1g; 6c1h; 5t0x; 1x02; 2jzi; 2k0e; 7l8v; 2kne; 1up5; 2m3s; 2ll7; 4djc; 5tp6; 6e2f; 2kdu; 2n8j; 2m55; 2mg5; 2n27; 2lv6; 6y94; 6zbi; 2m0j; 3g43; 7yv9; 2mgu; 1nwd; 2m0k; 1wrz; 2o5g; 3sjq; 7tzc; 2k0j; 6mud; 6tv7; 1g4y; 4l79; 5jqa; 5jth; 6u3a; 1xfz; 1xfy; 6b8n; 6b8q; 6b8p; 4j9y; 5gg…	77	2l7l; 1mux; 6feh; 5j8h; 5dow; 1prw; 6feg; 7nqc; 1cfc; 1cfd; 1cff; 1ckk; 6e2g; 6o20; 5oeo; 1dmo; 5tp5; 6gdk; 2o60; 1sy9; 4byf; 6but; 6c1d; 2ll6; 6c1g; 6c1h; 5t0x; 1x02; 2jzi; 2k0e; 7l8v; 2kne; 1up5; 2m3s; 2ll7; 4djc; 5tp6; 6e2f; 2kdu; 2n8j; 2m55; 2mg5; 2n27; 2lv6; 6y94; 6zbi; 2m0j; 6y95; 3g43; 7yv9; 2mgu; 1nwd; 2m0k; 1wrz; 2o5g; 3sjq; 7tzc; 2k0j; 6mud; 6tv7; 1g4y; 4l79; 5jqa; 5jth; 1qx5; 6u3a; 1xf…
					sulfate ion	bound	SO4	7.48212	1	5dow	1	70	2l7l; 1mux; 6feh; 5j8h; 5dow; 1prw; 6feg; 7nqc; 1cff; 1ckk; 6e2g; 6o20; 5oeo; 6gdk; 2o60; 1sy9; 4byf; 6but; 6c1d; 2ll6; 6c1g; 6c1h; 5t0x; 1x02; 2jzi; 2k0e; 7l8v; 2kne; 1up5; 2m3s; 2ll7; 4djc; 5tp6; 6e2f; 2kdu; 2n8j; 2m55; 2mg5; 2n27; 2lv6; 6y94; 6zbi; 2m0j; 3g43; 7yv9; 2mgu; 1nwd; 2m0k; 1wrz; 2o5g; 3sjq; 7tzc; 2k0j; 6mud; 6tv7; 1g4y; 4l79; 5jqa; 5jth; 6u3a; 1xfz; 1xfy; 6b8n; 6b8q; 6b8p; 4j9y; 5gg…	77	2l7l; 1mux; 6feh; 5j8h; 5dow; 1prw; 6feg; 7nqc; 1cfc; 1cfd; 1cff; 1ckk; 6e2g; 6o20; 5oeo; 1dmo; 5tp5; 6gdk; 2o60; 1sy9; 4byf; 6but; 6c1d; 2ll6; 6c1g; 6c1h; 5t0x; 1x02; 2jzi; 2k0e; 7l8v; 2kne; 1up5; 2m3s; 2ll7; 4djc; 5tp6; 6e2f; 2kdu; 2n8j; 2m55; 2mg5; 2n27; 2lv6; 6y94; 6zbi; 2m0j; 6y95; 3g43; 7yv9; 2mgu; 1nwd; 2m0k; 1wrz; 2o5g; 3sjq; 7tzc; 2k0j; 6mud; 6tv7; 1g4y; 4l79; 5jqa; 5jth; 1qx5; 6u3a; 1xf…
					voltage-dependent l-type calcium channel subunit alpha-1c	polypeptide(L)		7.9052	1	6u3a	1	70	2l7l; 1mux; 6feh; 5j8h; 5dow; 1prw; 6feg; 7nqc; 1cff; 1ckk; 6e2g; 6o20; 5oeo; 6gdk; 2o60; 1sy9; 4byf; 6but; 6c1d; 2ll6; 6c1g; 6c1h; 5t0x; 1x02; 2jzi; 2k0e; 7l8v; 2kne; 1up5; 2m3s; 2ll7; 4djc; 5tp6; 6e2f; 2kdu; 2n8j; 2m55; 2mg5; 2n27; 2lv6; 6y94; 6zbi; 2m0j; 3g43; 7yv9; 2mgu; 1nwd; 2m0k; 1wrz; 2o5g; 3sjq; 7tzc; 2k0j; 6mud; 6tv7; 1g4y; 4l79; 5jqa; 5jth; 6u3a; 1xfz; 1xfy; 6b8n; 6b8q; 6b8p; 4j9y; 5gg…	77	2l7l; 1mux; 6feh; 5j8h; 5dow; 1prw; 6feg; 7nqc; 1cfc; 1cfd; 1cff; 1ckk; 6e2g; 6o20; 5oeo; 1dmo; 5tp5; 6gdk; 2o60; 1sy9; 4byf; 6but; 6c1d; 2ll6; 6c1g; 6c1h; 5t0x; 1x02; 2jzi; 2k0e; 7l8v; 2kne; 1up5; 2m3s; 2ll7; 4djc; 5tp6; 6e2f; 2kdu; 2n8j; 2m55; 2mg5; 2n27; 2lv6; 6y94; 6zbi; 2m0j; 6y95; 3g43; 7yv9; 2mgu; 1nwd; 2m0k; 1wrz; 2o5g; 3sjq; 7tzc; 2k0j; 6mud; 6tv7; 1g4y; 4l79; 5jqa; 5jth; 1qx5; 6u3a; 1xf…
8	EGR3	NP_004421.2	H319R	-5.769	dna (5'-d(*tp*ap*(5cm)p*gp*cp*cp*cp*ap*cp*gp*c)-3')	polydeoxyribonucleotide		3.42045	7	4r2s; 5kl4; 4r2e; 5kl7; 4r2r; 5kl5; 4r2a	7	49	5kl6; 4r2s; 5kl3; 6b0o; 6b0q; 5kl2; 5kl4; 4r2e; 4r2p; 4r2q; 5kl7; 4r2r; 6b0r; 5kl5; 6b0p; 2jpa; 2jp9; 6wlh; 2prt; 6blw; 4r2d; 1g2d; 1g2f; 4x9j; 4r2a; 4r2c; 1p47; 1aay; 1jk1; 1a1h; 1a1i; 1a1l; 1zaa; 1jk2; 1a1k; 1a1g; 1a1j; 1a1f; 1f2i; 1llm; 1xf7; 1sp2; 1va2; 6pv0; 6pv1; 6uco; 6ucp; 6pv2; 6pv3	49	5kl6; 4r2s; 5kl3; 6b0o; 6b0q; 5kl2; 5kl4; 4r2e; 4r2p; 4r2q; 5kl7; 4r2r; 6b0r; 5kl5; 6b0p; 2jpa; 2jp9; 6wlh; 2prt; 6blw; 4r2d; 1g2d; 1g2f; 4x9j; 4r2a; 4r2c; 1p47; 1aay; 1jk1; 1a1h; 1a1i; 1a1l; 1zaa; 1jk2; 1a1k; 1a1g; 1a1j; 1a1f; 1f2i; 1llm; 1xf7; 1sp2; 1va2; 6pv0; 6pv1; 6uco; 6ucp; 6pv2; 6pv3
					dna (5'-d(*ap*gp*cp*gp*tp*gp*gp*gp*cp*gp*t)-3')	polydeoxyribonucleotide		2.65027	4	1aay; 1zaa; 1a1g; 1a1j	4	49	5kl6; 4r2s; 5kl3; 6b0o; 6b0q; 5kl2; 5kl4; 4r2e; 4r2p; 4r2q; 5kl7; 4r2r; 6b0r; 5kl5; 6b0p; 2jpa; 2jp9; 6wlh; 2prt; 6blw; 4r2d; 1g2d; 1g2f; 4x9j; 4r2a; 4r2c; 1p47; 1aay; 1jk1; 1a1h; 1a1i; 1a1l; 1zaa; 1jk2; 1a1k; 1a1g; 1a1j; 1a1f; 1f2i; 1llm; 1xf7; 1sp2; 1va2; 6pv0; 6pv1; 6uco; 6ucp; 6pv2; 6pv3	49	5kl6; 4r2s; 5kl3; 6b0o; 6b0q; 5kl2; 5kl4; 4r2e; 4r2p; 4r2q; 5kl7; 4r2r; 6b0r; 5kl5; 6b0p; 2jpa; 2jp9; 6wlh; 2prt; 6blw; 4r2d; 1g2d; 1g2f; 4x9j; 4r2a; 4r2c; 1p47; 1aay; 1jk1; 1a1h; 1a1i; 1a1l; 1zaa; 1jk2; 1a1k; 1a1g; 1a1j; 1a1f; 1f2i; 1llm; 1xf7; 1sp2; 1va2; 6pv0; 6pv1; 6uco; 6ucp; 6pv2; 6pv3
					dna (5'-d(*tp*ap*cp*gp*cp*cp*cp*ap*cp*gp*c)-3')	polydeoxyribonucleotide		4.76362	4	1aay; 1zaa; 1a1g; 1a1j	4	49	5kl6; 4r2s; 5kl3; 6b0o; 6b0q; 5kl2; 5kl4; 4r2e; 4r2p; 4r2q; 5kl7; 4r2r; 6b0r; 5kl5; 6b0p; 2jpa; 2jp9; 6wlh; 2prt; 6blw; 4r2d; 1g2d; 1g2f; 4x9j; 4r2a; 4r2c; 1p47; 1aay; 1jk1; 1a1h; 1a1i; 1a1l; 1zaa; 1jk2; 1a1k; 1a1g; 1a1j; 1a1f; 1f2i; 1llm; 1xf7; 1sp2; 1va2; 6pv0; 6pv1; 6uco; 6ucp; 6pv2; 6pv3	49	5kl6; 4r2s; 5kl3; 6b0o; 6b0q; 5kl2; 5kl4; 4r2e; 4r2p; 4r2q; 5kl7; 4r2r; 6b0r; 5kl5; 6b0p; 2jpa; 2jp9; 6wlh; 2prt; 6blw; 4r2d; 1g2d; 1g2f; 4x9j; 4r2a; 4r2c; 1p47; 1aay; 1jk1; 1a1h; 1a1i; 1a1l; 1zaa; 1jk2; 1a1k; 1a1g; 1a1j; 1a1f; 1f2i; 1llm; 1xf7; 1sp2; 1va2; 6pv0; 6pv1; 6uco; 6ucp; 6pv2; 6pv3
					dna (5'-d(*ap*gp*cp*gp*tp*gp*gp*gp*(5fc)p*gp*t)-3')	polydeoxyribonucleotide		1.98227	3	5kl4; 4r2q; 4r2d	3	49	5kl6; 4r2s; 5kl3; 6b0o; 6b0q; 5kl2; 5kl4; 4r2e; 4r2p; 4r2q; 5kl7; 4r2r; 6b0r; 5kl5; 6b0p; 2jpa; 2jp9; 6wlh; 2prt; 6blw; 4r2d; 1g2d; 1g2f; 4x9j; 4r2a; 4r2c; 1p47; 1aay; 1jk1; 1a1h; 1a1i; 1a1l; 1zaa; 1jk2; 1a1k; 1a1g; 1a1j; 1a1f; 1f2i; 1llm; 1xf7; 1sp2; 1va2; 6pv0; 6pv1; 6uco; 6ucp; 6pv2; 6pv3	49	5kl6; 4r2s; 5kl3; 6b0o; 6b0q; 5kl2; 5kl4; 4r2e; 4r2p; 4r2q; 5kl7; 4r2r; 6b0r; 5kl5; 6b0p; 2jpa; 2jp9; 6wlh; 2prt; 6blw; 4r2d; 1g2d; 1g2f; 4x9j; 4r2a; 4r2c; 1p47; 1aay; 1jk1; 1a1h; 1a1i; 1a1l; 1zaa; 1jk2; 1a1k; 1a1g; 1a1j; 1a1f; 1f2i; 1llm; 1xf7; 1sp2; 1va2; 6pv0; 6pv1; 6uco; 6ucp; 6pv2; 6pv3
					dna (5'-d(*ap*gp*cp*gp*tp*gp*gp*gp*(1cc)p*gp*t)-3')	polydeoxyribonucleotide		2.02416	3	5kl7; 4r2r; 5kl5	3	49	5kl6; 4r2s; 5kl3; 6b0o; 6b0q; 5kl2; 5kl4; 4r2e; 4r2p; 4r2q; 5kl7; 4r2r; 6b0r; 5kl5; 6b0p; 2jpa; 2jp9; 6wlh; 2prt; 6blw; 4r2d; 1g2d; 1g2f; 4x9j; 4r2a; 4r2c; 1p47; 1aay; 1jk1; 1a1h; 1a1i; 1a1l; 1zaa; 1jk2; 1a1k; 1a1g; 1a1j; 1a1f; 1f2i; 1llm; 1xf7; 1sp2; 1va2; 6pv0; 6pv1; 6uco; 6ucp; 6pv2; 6pv3	49	5kl6; 4r2s; 5kl3; 6b0o; 6b0q; 5kl2; 5kl4; 4r2e; 4r2p; 4r2q; 5kl7; 4r2r; 6b0r; 5kl5; 6b0p; 2jpa; 2jp9; 6wlh; 2prt; 6blw; 4r2d; 1g2d; 1g2f; 4x9j; 4r2a; 4r2c; 1p47; 1aay; 1jk1; 1a1h; 1a1i; 1a1l; 1zaa; 1jk2; 1a1k; 1a1g; 1a1j; 1a1f; 1f2i; 1llm; 1xf7; 1sp2; 1va2; 6pv0; 6pv1; 6uco; 6ucp; 6pv2; 6pv3
					dna (5'-d(*ap*gp*cp*gp*tp*gp*gp*gp*(5cm)p*gp*t)-3')	polydeoxyribonucleotide		2.75501	3	4r2s; 4r2e; 4r2a	3	49	5kl6; 4r2s; 5kl3; 6b0o; 6b0q; 5kl2; 5kl4; 4r2e; 4r2p; 4r2q; 5kl7; 4r2r; 6b0r; 5kl5; 6b0p; 2jpa; 2jp9; 6wlh; 2prt; 6blw; 4r2d; 1g2d; 1g2f; 4x9j; 4r2a; 4r2c; 1p47; 1aay; 1jk1; 1a1h; 1a1i; 1a1l; 1zaa; 1jk2; 1a1k; 1a1g; 1a1j; 1a1f; 1f2i; 1llm; 1xf7; 1sp2; 1va2; 6pv0; 6pv1; 6uco; 6ucp; 6pv2; 6pv3	49	5kl6; 4r2s; 5kl3; 6b0o; 6b0q; 5kl2; 5kl4; 4r2e; 4r2p; 4r2q; 5kl7; 4r2r; 6b0r; 5kl5; 6b0p; 2jpa; 2jp9; 6wlh; 2prt; 6blw; 4r2d; 1g2d; 1g2f; 4x9j; 4r2a; 4r2c; 1p47; 1aay; 1jk1; 1a1h; 1a1i; 1a1l; 1zaa; 1jk2; 1a1k; 1a1g; 1a1j; 1a1f; 1f2i; 1llm; 1xf7; 1sp2; 1va2; 6pv0; 6pv1; 6uco; 6ucp; 6pv2; 6pv3
					dna (5'-d(*ap*gp*cp*gp*tp*gp*gp*gp*cp*ap*c)-3')	polydeoxyribonucleotide		2.63953	3	1a1h; 1a1i; 1a1l	3	49	5kl6; 4r2s; 5kl3; 6b0o; 6b0q; 5kl2; 5kl4; 4r2e; 4r2p; 4r2q; 5kl7; 4r2r; 6b0r; 5kl5; 6b0p; 2jpa; 2jp9; 6wlh; 2prt; 6blw; 4r2d; 1g2d; 1g2f; 4x9j; 4r2a; 4r2c; 1p47; 1aay; 1jk1; 1a1h; 1a1i; 1a1l; 1zaa; 1jk2; 1a1k; 1a1g; 1a1j; 1a1f; 1f2i; 1llm; 1xf7; 1sp2; 1va2; 6pv0; 6pv1; 6uco; 6ucp; 6pv2; 6pv3	49	5kl6; 4r2s; 5kl3; 6b0o; 6b0q; 5kl2; 5kl4; 4r2e; 4r2p; 4r2q; 5kl7; 4r2r; 6b0r; 5kl5; 6b0p; 2jpa; 2jp9; 6wlh; 2prt; 6blw; 4r2d; 1g2d; 1g2f; 4x9j; 4r2a; 4r2c; 1p47; 1aay; 1jk1; 1a1h; 1a1i; 1a1l; 1zaa; 1jk2; 1a1k; 1a1g; 1a1j; 1a1f; 1f2i; 1llm; 1xf7; 1sp2; 1va2; 6pv0; 6pv1; 6uco; 6ucp; 6pv2; 6pv3
					dna (5'-d(*tp*gp*tp*gp*cp*cp*cp*ap*cp*gp*c)-3')	polydeoxyribonucleotide		4.92906	3	1a1h; 1a1i; 1a1l	3	49	5kl6; 4r2s; 5kl3; 6b0o; 6b0q; 5kl2; 5kl4; 4r2e; 4r2p; 4r2q; 5kl7; 4r2r; 6b0r; 5kl5; 6b0p; 2jpa; 2jp9; 6wlh; 2prt; 6blw; 4r2d; 1g2d; 1g2f; 4x9j; 4r2a; 4r2c; 1p47; 1aay; 1jk1; 1a1h; 1a1i; 1a1l; 1zaa; 1jk2; 1a1k; 1a1g; 1a1j; 1a1f; 1f2i; 1llm; 1xf7; 1sp2; 1va2; 6pv0; 6pv1; 6uco; 6ucp; 6pv2; 6pv3	49	5kl6; 4r2s; 5kl3; 6b0o; 6b0q; 5kl2; 5kl4; 4r2e; 4r2p; 4r2q; 5kl7; 4r2r; 6b0r; 5kl5; 6b0p; 2jpa; 2jp9; 6wlh; 2prt; 6blw; 4r2d; 1g2d; 1g2f; 4x9j; 4r2a; 4r2c; 1p47; 1aay; 1jk1; 1a1h; 1a1i; 1a1l; 1zaa; 1jk2; 1a1k; 1a1g; 1a1j; 1a1f; 1f2i; 1llm; 1xf7; 1sp2; 1va2; 6pv0; 6pv1; 6uco; 6ucp; 6pv2; 6pv3
					5'-d(*gp*ap*cp*gp*cp*tp*ap*tp*ap*ap*ap*ap*gp*gp*ap*g)-3'	polydeoxyribonucleotide		3.39866	2	1g2d; 1g2f	0	49	5kl6; 4r2s; 5kl3; 6b0o; 6b0q; 5kl2; 5kl4; 4r2e; 4r2p; 4r2q; 5kl7; 4r2r; 6b0r; 5kl5; 6b0p; 2jpa; 2jp9; 6wlh; 2prt; 6blw; 4r2d; 1g2d; 1g2f; 4x9j; 4r2a; 4r2c; 1p47; 1aay; 1jk1; 1a1h; 1a1i; 1a1l; 1zaa; 1jk2; 1a1k; 1a1g; 1a1j; 1a1f; 1f2i; 1llm; 1xf7; 1sp2; 1va2; 6pv0; 6pv1; 6uco; 6ucp; 6pv2; 6pv3	49	5kl6; 4r2s; 5kl3; 6b0o; 6b0q; 5kl2; 5kl4; 4r2e; 4r2p; 4r2q; 5kl7; 4r2r; 6b0r; 5kl5; 6b0p; 2jpa; 2jp9; 6wlh; 2prt; 6blw; 4r2d; 1g2d; 1g2f; 4x9j; 4r2a; 4r2c; 1p47; 1aay; 1jk1; 1a1h; 1a1i; 1a1l; 1zaa; 1jk2; 1a1k; 1a1g; 1a1j; 1a1f; 1f2i; 1llm; 1xf7; 1sp2; 1va2; 6pv0; 6pv1; 6uco; 6ucp; 6pv2; 6pv3
					5'-d(*tp*cp*cp*tp*tp*tp*tp*ap*tp*ap*gp*cp*gp*tp*cp*c)-3'	polydeoxyribonucleotide		6.11199	2	1g2d; 1g2f	0	49	5kl6; 4r2s; 5kl3; 6b0o; 6b0q; 5kl2; 5kl4; 4r2e; 4r2p; 4r2q; 5kl7; 4r2r; 6b0r; 5kl5; 6b0p; 2jpa; 2jp9; 6wlh; 2prt; 6blw; 4r2d; 1g2d; 1g2f; 4x9j; 4r2a; 4r2c; 1p47; 1aay; 1jk1; 1a1h; 1a1i; 1a1l; 1zaa; 1jk2; 1a1k; 1a1g; 1a1j; 1a1f; 1f2i; 1llm; 1xf7; 1sp2; 1va2; 6pv0; 6pv1; 6uco; 6ucp; 6pv2; 6pv3	49	5kl6; 4r2s; 5kl3; 6b0o; 6b0q; 5kl2; 5kl4; 4r2e; 4r2p; 4r2q; 5kl7; 4r2r; 6b0r; 5kl5; 6b0p; 2jpa; 2jp9; 6wlh; 2prt; 6blw; 4r2d; 1g2d; 1g2f; 4x9j; 4r2a; 4r2c; 1p47; 1aay; 1jk1; 1a1h; 1a1i; 1a1l; 1zaa; 1jk2; 1a1k; 1a1g; 1a1j; 1a1f; 1f2i; 1llm; 1xf7; 1sp2; 1va2; 6pv0; 6pv1; 6uco; 6ucp; 6pv2; 6pv3
					dna (5'-d(*ap*gp*cp*gp*tp*gp*gp*gp*(5hc)p*gp*t)-3')	polydeoxyribonucleotide		2.76439	2	4r2p; 4r2c	2	49	5kl6; 4r2s; 5kl3; 6b0o; 6b0q; 5kl2; 5kl4; 4r2e; 4r2p; 4r2q; 5kl7; 4r2r; 6b0r; 5kl5; 6b0p; 2jpa; 2jp9; 6wlh; 2prt; 6blw; 4r2d; 1g2d; 1g2f; 4x9j; 4r2a; 4r2c; 1p47; 1aay; 1jk1; 1a1h; 1a1i; 1a1l; 1zaa; 1jk2; 1a1k; 1a1g; 1a1j; 1a1f; 1f2i; 1llm; 1xf7; 1sp2; 1va2; 6pv0; 6pv1; 6uco; 6ucp; 6pv2; 6pv3	49	5kl6; 4r2s; 5kl3; 6b0o; 6b0q; 5kl2; 5kl4; 4r2e; 4r2p; 4r2q; 5kl7; 4r2r; 6b0r; 5kl5; 6b0p; 2jpa; 2jp9; 6wlh; 2prt; 6blw; 4r2d; 1g2d; 1g2f; 4x9j; 4r2a; 4r2c; 1p47; 1aay; 1jk1; 1a1h; 1a1i; 1a1l; 1zaa; 1jk2; 1a1k; 1a1g; 1a1j; 1a1f; 1f2i; 1llm; 1xf7; 1sp2; 1va2; 6pv0; 6pv1; 6uco; 6ucp; 6pv2; 6pv3
					dna (5'-d(*ap*gp*cp*gp*tp*gp*gp*gp*ap*cp*c)-3')	polydeoxyribonucleotide		2.55044	2	1a1k; 1a1f	2	49	5kl6; 4r2s; 5kl3; 6b0o; 6b0q; 5kl2; 5kl4; 4r2e; 4r2p; 4r2q; 5kl7; 4r2r; 6b0r; 5kl5; 6b0p; 2jpa; 2jp9; 6wlh; 2prt; 6blw; 4r2d; 1g2d; 1g2f; 4x9j; 4r2a; 4r2c; 1p47; 1aay; 1jk1; 1a1h; 1a1i; 1a1l; 1zaa; 1jk2; 1a1k; 1a1g; 1a1j; 1a1f; 1f2i; 1llm; 1xf7; 1sp2; 1va2; 6pv0; 6pv1; 6uco; 6ucp; 6pv2; 6pv3	49	5kl6; 4r2s; 5kl3; 6b0o; 6b0q; 5kl2; 5kl4; 4r2e; 4r2p; 4r2q; 5kl7; 4r2r; 6b0r; 5kl5; 6b0p; 2jpa; 2jp9; 6wlh; 2prt; 6blw; 4r2d; 1g2d; 1g2f; 4x9j; 4r2a; 4r2c; 1p47; 1aay; 1jk1; 1a1h; 1a1i; 1a1l; 1zaa; 1jk2; 1a1k; 1a1g; 1a1j; 1a1f; 1f2i; 1llm; 1xf7; 1sp2; 1va2; 6pv0; 6pv1; 6uco; 6ucp; 6pv2; 6pv3
					dna (5'-d(*ap*gp*cp*gp*tp*gp*gp*gp*ap*gp*t)-3')	polydeoxyribonucleotide		1.92718	2	5kl3; 5kl2	2	49	5kl6; 4r2s; 5kl3; 6b0o; 6b0q; 5kl2; 5kl4; 4r2e; 4r2p; 4r2q; 5kl7; 4r2r; 6b0r; 5kl5; 6b0p; 2jpa; 2jp9; 6wlh; 2prt; 6blw; 4r2d; 1g2d; 1g2f; 4x9j; 4r2a; 4r2c; 1p47; 1aay; 1jk1; 1a1h; 1a1i; 1a1l; 1zaa; 1jk2; 1a1k; 1a1g; 1a1j; 1a1f; 1f2i; 1llm; 1xf7; 1sp2; 1va2; 6pv0; 6pv1; 6uco; 6ucp; 6pv2; 6pv3	49	5kl6; 4r2s; 5kl3; 6b0o; 6b0q; 5kl2; 5kl4; 4r2e; 4r2p; 4r2q; 5kl7; 4r2r; 6b0r; 5kl5; 6b0p; 2jpa; 2jp9; 6wlh; 2prt; 6blw; 4r2d; 1g2d; 1g2f; 4x9j; 4r2a; 4r2c; 1p47; 1aay; 1jk1; 1a1h; 1a1i; 1a1l; 1zaa; 1jk2; 1a1k; 1a1g; 1a1j; 1a1f; 1f2i; 1llm; 1xf7; 1sp2; 1va2; 6pv0; 6pv1; 6uco; 6ucp; 6pv2; 6pv3
					dna (5'-d(*tp*ap*cp*tp*cp*cp*cp*ap*cp*gp*c)-3')	polydeoxyribonucleotide		3.60401	2	5kl3; 5kl2	2	49	5kl6; 4r2s; 5kl3; 6b0o; 6b0q; 5kl2; 5kl4; 4r2e; 4r2p; 4r2q; 5kl7; 4r2r; 6b0r; 5kl5; 6b0p; 2jpa; 2jp9; 6wlh; 2prt; 6blw; 4r2d; 1g2d; 1g2f; 4x9j; 4r2a; 4r2c; 1p47; 1aay; 1jk1; 1a1h; 1a1i; 1a1l; 1zaa; 1jk2; 1a1k; 1a1g; 1a1j; 1a1f; 1f2i; 1llm; 1xf7; 1sp2; 1va2; 6pv0; 6pv1; 6uco; 6ucp; 6pv2; 6pv3	49	5kl6; 4r2s; 5kl3; 6b0o; 6b0q; 5kl2; 5kl4; 4r2e; 4r2p; 4r2q; 5kl7; 4r2r; 6b0r; 5kl5; 6b0p; 2jpa; 2jp9; 6wlh; 2prt; 6blw; 4r2d; 1g2d; 1g2f; 4x9j; 4r2a; 4r2c; 1p47; 1aay; 1jk1; 1a1h; 1a1i; 1a1l; 1zaa; 1jk2; 1a1k; 1a1g; 1a1j; 1a1f; 1f2i; 1llm; 1xf7; 1sp2; 1va2; 6pv0; 6pv1; 6uco; 6ucp; 6pv2; 6pv3
					dna (5'-d(*tp*ap*(5fc)p*gp*cp*cp*cp*ap*cp*gp*c)-3')	polydeoxyribonucleotide		4.9559	2	4r2q; 4r2d	2	49	5kl6; 4r2s; 5kl3; 6b0o; 6b0q; 5kl2; 5kl4; 4r2e; 4r2p; 4r2q; 5kl7; 4r2r; 6b0r; 5kl5; 6b0p; 2jpa; 2jp9; 6wlh; 2prt; 6blw; 4r2d; 1g2d; 1g2f; 4x9j; 4r2a; 4r2c; 1p47; 1aay; 1jk1; 1a1h; 1a1i; 1a1l; 1zaa; 1jk2; 1a1k; 1a1g; 1a1j; 1a1f; 1f2i; 1llm; 1xf7; 1sp2; 1va2; 6pv0; 6pv1; 6uco; 6ucp; 6pv2; 6pv3	49	5kl6; 4r2s; 5kl3; 6b0o; 6b0q; 5kl2; 5kl4; 4r2e; 4r2p; 4r2q; 5kl7; 4r2r; 6b0r; 5kl5; 6b0p; 2jpa; 2jp9; 6wlh; 2prt; 6blw; 4r2d; 1g2d; 1g2f; 4x9j; 4r2a; 4r2c; 1p47; 1aay; 1jk1; 1a1h; 1a1i; 1a1l; 1zaa; 1jk2; 1a1k; 1a1g; 1a1j; 1a1f; 1f2i; 1llm; 1xf7; 1sp2; 1va2; 6pv0; 6pv1; 6uco; 6ucp; 6pv2; 6pv3
					dna (5'-d(*tp*ap*(5hc)p*gp*cp*cp*cp*ap*cp*gp*c)-3')	polydeoxyribonucleotide		4.78173	2	4r2p; 4r2c	2	49	5kl6; 4r2s; 5kl3; 6b0o; 6b0q; 5kl2; 5kl4; 4r2e; 4r2p; 4r2q; 5kl7; 4r2r; 6b0r; 5kl5; 6b0p; 2jpa; 2jp9; 6wlh; 2prt; 6blw; 4r2d; 1g2d; 1g2f; 4x9j; 4r2a; 4r2c; 1p47; 1aay; 1jk1; 1a1h; 1a1i; 1a1l; 1zaa; 1jk2; 1a1k; 1a1g; 1a1j; 1a1f; 1f2i; 1llm; 1xf7; 1sp2; 1va2; 6pv0; 6pv1; 6uco; 6ucp; 6pv2; 6pv3	49	5kl6; 4r2s; 5kl3; 6b0o; 6b0q; 5kl2; 5kl4; 4r2e; 4r2p; 4r2q; 5kl7; 4r2r; 6b0r; 5kl5; 6b0p; 2jpa; 2jp9; 6wlh; 2prt; 6blw; 4r2d; 1g2d; 1g2f; 4x9j; 4r2a; 4r2c; 1p47; 1aay; 1jk1; 1a1h; 1a1i; 1a1l; 1zaa; 1jk2; 1a1k; 1a1g; 1a1j; 1a1f; 1f2i; 1llm; 1xf7; 1sp2; 1va2; 6pv0; 6pv1; 6uco; 6ucp; 6pv2; 6pv3
					dna (5'-d(*tp*gp*gp*tp*cp*cp*cp*ap*cp*gp*c)-3')	polydeoxyribonucleotide		4.85998	2	1a1k; 1a1f	2	49	5kl6; 4r2s; 5kl3; 6b0o; 6b0q; 5kl2; 5kl4; 4r2e; 4r2p; 4r2q; 5kl7; 4r2r; 6b0r; 5kl5; 6b0p; 2jpa; 2jp9; 6wlh; 2prt; 6blw; 4r2d; 1g2d; 1g2f; 4x9j; 4r2a; 4r2c; 1p47; 1aay; 1jk1; 1a1h; 1a1i; 1a1l; 1zaa; 1jk2; 1a1k; 1a1g; 1a1j; 1a1f; 1f2i; 1llm; 1xf7; 1sp2; 1va2; 6pv0; 6pv1; 6uco; 6ucp; 6pv2; 6pv3	49	5kl6; 4r2s; 5kl3; 6b0o; 6b0q; 5kl2; 5kl4; 4r2e; 4r2p; 4r2q; 5kl7; 4r2r; 6b0r; 5kl5; 6b0p; 2jpa; 2jp9; 6wlh; 2prt; 6blw; 4r2d; 1g2d; 1g2f; 4x9j; 4r2a; 4r2c; 1p47; 1aay; 1jk1; 1a1h; 1a1i; 1a1l; 1zaa; 1jk2; 1a1k; 1a1g; 1a1j; 1a1f; 1f2i; 1llm; 1xf7; 1sp2; 1va2; 6pv0; 6pv1; 6uco; 6ucp; 6pv2; 6pv3
					5'-d(*ap*tp*gp*gp*gp*cp*gp*cp*gp*cp*cp*cp*ap*t)-3'	polydeoxyribonucleotide		2.5737	1	1f2i	1	49	5kl6; 4r2s; 5kl3; 6b0o; 6b0q; 5kl2; 5kl4; 4r2e; 4r2p; 4r2q; 5kl7; 4r2r; 6b0r; 5kl5; 6b0p; 2jpa; 2jp9; 6wlh; 2prt; 6blw; 4r2d; 1g2d; 1g2f; 4x9j; 4r2a; 4r2c; 1p47; 1aay; 1jk1; 1a1h; 1a1i; 1a1l; 1zaa; 1jk2; 1a1k; 1a1g; 1a1j; 1a1f; 1f2i; 1llm; 1xf7; 1sp2; 1va2; 6pv0; 6pv1; 6uco; 6ucp; 6pv2; 6pv3	49	5kl6; 4r2s; 5kl3; 6b0o; 6b0q; 5kl2; 5kl4; 4r2e; 4r2p; 4r2q; 5kl7; 4r2r; 6b0r; 5kl5; 6b0p; 2jpa; 2jp9; 6wlh; 2prt; 6blw; 4r2d; 1g2d; 1g2f; 4x9j; 4r2a; 4r2c; 1p47; 1aay; 1jk1; 1a1h; 1a1i; 1a1l; 1zaa; 1jk2; 1a1k; 1a1g; 1a1j; 1a1f; 1f2i; 1llm; 1xf7; 1sp2; 1va2; 6pv0; 6pv1; 6uco; 6ucp; 6pv2; 6pv3
					5'-d(*tp*cp*cp*cp*ap*cp*gp*cp*gp*tp*gp*gp*g)-3'	polydeoxyribonucleotide		2.83157	1	1llm	1	49	5kl6; 4r2s; 5kl3; 6b0o; 6b0q; 5kl2; 5kl4; 4r2e; 4r2p; 4r2q; 5kl7; 4r2r; 6b0r; 5kl5; 6b0p; 2jpa; 2jp9; 6wlh; 2prt; 6blw; 4r2d; 1g2d; 1g2f; 4x9j; 4r2a; 4r2c; 1p47; 1aay; 1jk1; 1a1h; 1a1i; 1a1l; 1zaa; 1jk2; 1a1k; 1a1g; 1a1j; 1a1f; 1f2i; 1llm; 1xf7; 1sp2; 1va2; 6pv0; 6pv1; 6uco; 6ucp; 6pv2; 6pv3	49	5kl6; 4r2s; 5kl3; 6b0o; 6b0q; 5kl2; 5kl4; 4r2e; 4r2p; 4r2q; 5kl7; 4r2r; 6b0r; 5kl5; 6b0p; 2jpa; 2jp9; 6wlh; 2prt; 6blw; 4r2d; 1g2d; 1g2f; 4x9j; 4r2a; 4r2c; 1p47; 1aay; 1jk1; 1a1h; 1a1i; 1a1l; 1zaa; 1jk2; 1a1k; 1a1g; 1a1j; 1a1f; 1f2i; 1llm; 1xf7; 1sp2; 1va2; 6pv0; 6pv1; 6uco; 6ucp; 6pv2; 6pv3
					5'-d(*gp*tp*gp*gp*cp*gp*tp*gp*gp*gp*cp*gp*gp*cp*gp*tp*gp*gp*gp*cp*gp*t)-3'	polydeoxyribonucleotide		2.30918	1	1p47	1	49	5kl6; 4r2s; 5kl3; 6b0o; 6b0q; 5kl2; 5kl4; 4r2e; 4r2p; 4r2q; 5kl7; 4r2r; 6b0r; 5kl5; 6b0p; 2jpa; 2jp9; 6wlh; 2prt; 6blw; 4r2d; 1g2d; 1g2f; 4x9j; 4r2a; 4r2c; 1p47; 1aay; 1jk1; 1a1h; 1a1i; 1a1l; 1zaa; 1jk2; 1a1k; 1a1g; 1a1j; 1a1f; 1f2i; 1llm; 1xf7; 1sp2; 1va2; 6pv0; 6pv1; 6uco; 6ucp; 6pv2; 6pv3	49	5kl6; 4r2s; 5kl3; 6b0o; 6b0q; 5kl2; 5kl4; 4r2e; 4r2p; 4r2q; 5kl7; 4r2r; 6b0r; 5kl5; 6b0p; 2jpa; 2jp9; 6wlh; 2prt; 6blw; 4r2d; 1g2d; 1g2f; 4x9j; 4r2a; 4r2c; 1p47; 1aay; 1jk1; 1a1h; 1a1i; 1a1l; 1zaa; 1jk2; 1a1k; 1a1g; 1a1j; 1a1f; 1f2i; 1llm; 1xf7; 1sp2; 1va2; 6pv0; 6pv1; 6uco; 6ucp; 6pv2; 6pv3
					dna (5'-d(*ap*gp*cp*gp*tp*gp*gp*gp*ap*gp*gp*gp*tp*tp*a)-3')	polydeoxyribonucleotide		2.6541	1	6b0r	1	49	5kl6; 4r2s; 5kl3; 6b0o; 6b0q; 5kl2; 5kl4; 4r2e; 4r2p; 4r2q; 5kl7; 4r2r; 6b0r; 5kl5; 6b0p; 2jpa; 2jp9; 6wlh; 2prt; 6blw; 4r2d; 1g2d; 1g2f; 4x9j; 4r2a; 4r2c; 1p47; 1aay; 1jk1; 1a1h; 1a1i; 1a1l; 1zaa; 1jk2; 1a1k; 1a1g; 1a1j; 1a1f; 1f2i; 1llm; 1xf7; 1sp2; 1va2; 6pv0; 6pv1; 6uco; 6ucp; 6pv2; 6pv3	49	5kl6; 4r2s; 5kl3; 6b0o; 6b0q; 5kl2; 5kl4; 4r2e; 4r2p; 4r2q; 5kl7; 4r2r; 6b0r; 5kl5; 6b0p; 2jpa; 2jp9; 6wlh; 2prt; 6blw; 4r2d; 1g2d; 1g2f; 4x9j; 4r2a; 4r2c; 1p47; 1aay; 1jk1; 1a1h; 1a1i; 1a1l; 1zaa; 1jk2; 1a1k; 1a1g; 1a1j; 1a1f; 1f2i; 1llm; 1xf7; 1sp2; 1va2; 6pv0; 6pv1; 6uco; 6ucp; 6pv2; 6pv3
					dna (5'-d(*ap*gp*cp*gp*tp*gp*gp*gp*ap*gp*tp*gp*t)-3')	polydeoxyribonucleotide		2.6551	1	6b0o	1	49	5kl6; 4r2s; 5kl3; 6b0o; 6b0q; 5kl2; 5kl4; 4r2e; 4r2p; 4r2q; 5kl7; 4r2r; 6b0r; 5kl5; 6b0p; 2jpa; 2jp9; 6wlh; 2prt; 6blw; 4r2d; 1g2d; 1g2f; 4x9j; 4r2a; 4r2c; 1p47; 1aay; 1jk1; 1a1h; 1a1i; 1a1l; 1zaa; 1jk2; 1a1k; 1a1g; 1a1j; 1a1f; 1f2i; 1llm; 1xf7; 1sp2; 1va2; 6pv0; 6pv1; 6uco; 6ucp; 6pv2; 6pv3	49	5kl6; 4r2s; 5kl3; 6b0o; 6b0q; 5kl2; 5kl4; 4r2e; 4r2p; 4r2q; 5kl7; 4r2r; 6b0r; 5kl5; 6b0p; 2jpa; 2jp9; 6wlh; 2prt; 6blw; 4r2d; 1g2d; 1g2f; 4x9j; 4r2a; 4r2c; 1p47; 1aay; 1jk1; 1a1h; 1a1i; 1a1l; 1zaa; 1jk2; 1a1k; 1a1g; 1a1j; 1a1f; 1f2i; 1llm; 1xf7; 1sp2; 1va2; 6pv0; 6pv1; 6uco; 6ucp; 6pv2; 6pv3
					5'-d(*cp*ap*cp*gp*cp*cp*cp*ap*cp*gp*cp*cp*gp*cp*cp*cp*ap*cp*gp*cp*cp*a)-3'	polydeoxyribonucleotide		4.74069	1	1p47	1	49	5kl6; 4r2s; 5kl3; 6b0o; 6b0q; 5kl2; 5kl4; 4r2e; 4r2p; 4r2q; 5kl7; 4r2r; 6b0r; 5kl5; 6b0p; 2jpa; 2jp9; 6wlh; 2prt; 6blw; 4r2d; 1g2d; 1g2f; 4x9j; 4r2a; 4r2c; 1p47; 1aay; 1jk1; 1a1h; 1a1i; 1a1l; 1zaa; 1jk2; 1a1k; 1a1g; 1a1j; 1a1f; 1f2i; 1llm; 1xf7; 1sp2; 1va2; 6pv0; 6pv1; 6uco; 6ucp; 6pv2; 6pv3	49	5kl6; 4r2s; 5kl3; 6b0o; 6b0q; 5kl2; 5kl4; 4r2e; 4r2p; 4r2q; 5kl7; 4r2r; 6b0r; 5kl5; 6b0p; 2jpa; 2jp9; 6wlh; 2prt; 6blw; 4r2d; 1g2d; 1g2f; 4x9j; 4r2a; 4r2c; 1p47; 1aay; 1jk1; 1a1h; 1a1i; 1a1l; 1zaa; 1jk2; 1a1k; 1a1g; 1a1j; 1a1f; 1f2i; 1llm; 1xf7; 1sp2; 1va2; 6pv0; 6pv1; 6uco; 6ucp; 6pv2; 6pv3
					dna (5'-d(*tp*ap*cp*ap*cp*tp*cp*cp*cp*ap*cp*gp*c)-3')	polydeoxyribonucleotide		4.85614	1	6b0o	1	49	5kl6; 4r2s; 5kl3; 6b0o; 6b0q; 5kl2; 5kl4; 4r2e; 4r2p; 4r2q; 5kl7; 4r2r; 6b0r; 5kl5; 6b0p; 2jpa; 2jp9; 6wlh; 2prt; 6blw; 4r2d; 1g2d; 1g2f; 4x9j; 4r2a; 4r2c; 1p47; 1aay; 1jk1; 1a1h; 1a1i; 1a1l; 1zaa; 1jk2; 1a1k; 1a1g; 1a1j; 1a1f; 1f2i; 1llm; 1xf7; 1sp2; 1va2; 6pv0; 6pv1; 6uco; 6ucp; 6pv2; 6pv3	49	5kl6; 4r2s; 5kl3; 6b0o; 6b0q; 5kl2; 5kl4; 4r2e; 4r2p; 4r2q; 5kl7; 4r2r; 6b0r; 5kl5; 6b0p; 2jpa; 2jp9; 6wlh; 2prt; 6blw; 4r2d; 1g2d; 1g2f; 4x9j; 4r2a; 4r2c; 1p47; 1aay; 1jk1; 1a1h; 1a1i; 1a1l; 1zaa; 1jk2; 1a1k; 1a1g; 1a1j; 1a1f; 1f2i; 1llm; 1xf7; 1sp2; 1va2; 6pv0; 6pv1; 6uco; 6ucp; 6pv2; 6pv3
					dna (5'-d(p*ap*ap*cp*ap*cp*tp*cp*cp*cp*ap*cp*gp*c)-3')	polydeoxyribonucleotide		5.17898	1	6b0q	1	49	5kl6; 4r2s; 5kl3; 6b0o; 6b0q; 5kl2; 5kl4; 4r2e; 4r2p; 4r2q; 5kl7; 4r2r; 6b0r; 5kl5; 6b0p; 2jpa; 2jp9; 6wlh; 2prt; 6blw; 4r2d; 1g2d; 1g2f; 4x9j; 4r2a; 4r2c; 1p47; 1aay; 1jk1; 1a1h; 1a1i; 1a1l; 1zaa; 1jk2; 1a1k; 1a1g; 1a1j; 1a1f; 1f2i; 1llm; 1xf7; 1sp2; 1va2; 6pv0; 6pv1; 6uco; 6ucp; 6pv2; 6pv3	49	5kl6; 4r2s; 5kl3; 6b0o; 6b0q; 5kl2; 5kl4; 4r2e; 4r2p; 4r2q; 5kl7; 4r2r; 6b0r; 5kl5; 6b0p; 2jpa; 2jp9; 6wlh; 2prt; 6blw; 4r2d; 1g2d; 1g2f; 4x9j; 4r2a; 4r2c; 1p47; 1aay; 1jk1; 1a1h; 1a1i; 1a1l; 1zaa; 1jk2; 1a1k; 1a1g; 1a1j; 1a1f; 1f2i; 1llm; 1xf7; 1sp2; 1va2; 6pv0; 6pv1; 6uco; 6ucp; 6pv2; 6pv3
					dna (5'-d(p*ap*cp*cp*cp*tp*cp*cp*cp*ap*cp*gp*c)-3')	polydeoxyribonucleotide		5.00217	1	6b0p	1	49	5kl6; 4r2s; 5kl3; 6b0o; 6b0q; 5kl2; 5kl4; 4r2e; 4r2p; 4r2q; 5kl7; 4r2r; 6b0r; 5kl5; 6b0p; 2jpa; 2jp9; 6wlh; 2prt; 6blw; 4r2d; 1g2d; 1g2f; 4x9j; 4r2a; 4r2c; 1p47; 1aay; 1jk1; 1a1h; 1a1i; 1a1l; 1zaa; 1jk2; 1a1k; 1a1g; 1a1j; 1a1f; 1f2i; 1llm; 1xf7; 1sp2; 1va2; 6pv0; 6pv1; 6uco; 6ucp; 6pv2; 6pv3	49	5kl6; 4r2s; 5kl3; 6b0o; 6b0q; 5kl2; 5kl4; 4r2e; 4r2p; 4r2q; 5kl7; 4r2r; 6b0r; 5kl5; 6b0p; 2jpa; 2jp9; 6wlh; 2prt; 6blw; 4r2d; 1g2d; 1g2f; 4x9j; 4r2a; 4r2c; 1p47; 1aay; 1jk1; 1a1h; 1a1i; 1a1l; 1zaa; 1jk2; 1a1k; 1a1g; 1a1j; 1a1f; 1f2i; 1llm; 1xf7; 1sp2; 1va2; 6pv0; 6pv1; 6uco; 6ucp; 6pv2; 6pv3
					dna (5'-d(p*gp*cp*gp*tp*gp*gp*gp*ap*gp*gp*gp*t)-3')	polydeoxyribonucleotide		2.6657	1	6b0p	1	49	5kl6; 4r2s; 5kl3; 6b0o; 6b0q; 5kl2; 5kl4; 4r2e; 4r2p; 4r2q; 5kl7; 4r2r; 6b0r; 5kl5; 6b0p; 2jpa; 2jp9; 6wlh; 2prt; 6blw; 4r2d; 1g2d; 1g2f; 4x9j; 4r2a; 4r2c; 1p47; 1aay; 1jk1; 1a1h; 1a1i; 1a1l; 1zaa; 1jk2; 1a1k; 1a1g; 1a1j; 1a1f; 1f2i; 1llm; 1xf7; 1sp2; 1va2; 6pv0; 6pv1; 6uco; 6ucp; 6pv2; 6pv3	49	5kl6; 4r2s; 5kl3; 6b0o; 6b0q; 5kl2; 5kl4; 4r2e; 4r2p; 4r2q; 5kl7; 4r2r; 6b0r; 5kl5; 6b0p; 2jpa; 2jp9; 6wlh; 2prt; 6blw; 4r2d; 1g2d; 1g2f; 4x9j; 4r2a; 4r2c; 1p47; 1aay; 1jk1; 1a1h; 1a1i; 1a1l; 1zaa; 1jk2; 1a1k; 1a1g; 1a1j; 1a1f; 1f2i; 1llm; 1xf7; 1sp2; 1va2; 6pv0; 6pv1; 6uco; 6ucp; 6pv2; 6pv3
					dna (5'-d(p*gp*cp*gp*tp*gp*gp*gp*ap*gp*tp*gp*tp*t)-3')	polydeoxyribonucleotide		2.71172	1	6b0q	1	49	5kl6; 4r2s; 5kl3; 6b0o; 6b0q; 5kl2; 5kl4; 4r2e; 4r2p; 4r2q; 5kl7; 4r2r; 6b0r; 5kl5; 6b0p; 2jpa; 2jp9; 6wlh; 2prt; 6blw; 4r2d; 1g2d; 1g2f; 4x9j; 4r2a; 4r2c; 1p47; 1aay; 1jk1; 1a1h; 1a1i; 1a1l; 1zaa; 1jk2; 1a1k; 1a1g; 1a1j; 1a1f; 1f2i; 1llm; 1xf7; 1sp2; 1va2; 6pv0; 6pv1; 6uco; 6ucp; 6pv2; 6pv3	49	5kl6; 4r2s; 5kl3; 6b0o; 6b0q; 5kl2; 5kl4; 4r2e; 4r2p; 4r2q; 5kl7; 4r2r; 6b0r; 5kl5; 6b0p; 2jpa; 2jp9; 6wlh; 2prt; 6blw; 4r2d; 1g2d; 1g2f; 4x9j; 4r2a; 4r2c; 1p47; 1aay; 1jk1; 1a1h; 1a1i; 1a1l; 1zaa; 1jk2; 1a1k; 1a1g; 1a1j; 1a1f; 1f2i; 1llm; 1xf7; 1sp2; 1va2; 6pv0; 6pv1; 6uco; 6ucp; 6pv2; 6pv3
					dna (5'-d(p*tp*ap*ap*cp*cp*cp*tp*cp*cp*cp*ap*cp*gp*c)-3')	polydeoxyribonucleotide		4.95412	1	6b0r	1	49	5kl6; 4r2s; 5kl3; 6b0o; 6b0q; 5kl2; 5kl4; 4r2e; 4r2p; 4r2q; 5kl7; 4r2r; 6b0r; 5kl5; 6b0p; 2jpa; 2jp9; 6wlh; 2prt; 6blw; 4r2d; 1g2d; 1g2f; 4x9j; 4r2a; 4r2c; 1p47; 1aay; 1jk1; 1a1h; 1a1i; 1a1l; 1zaa; 1jk2; 1a1k; 1a1g; 1a1j; 1a1f; 1f2i; 1llm; 1xf7; 1sp2; 1va2; 6pv0; 6pv1; 6uco; 6ucp; 6pv2; 6pv3	49	5kl6; 4r2s; 5kl3; 6b0o; 6b0q; 5kl2; 5kl4; 4r2e; 4r2p; 4r2q; 5kl7; 4r2r; 6b0r; 5kl5; 6b0p; 2jpa; 2jp9; 6wlh; 2prt; 6blw; 4r2d; 1g2d; 1g2f; 4x9j; 4r2a; 4r2c; 1p47; 1aay; 1jk1; 1a1h; 1a1i; 1a1l; 1zaa; 1jk2; 1a1k; 1a1g; 1a1j; 1a1f; 1f2i; 1llm; 1xf7; 1sp2; 1va2; 6pv0; 6pv1; 6uco; 6ucp; 6pv2; 6pv3
					rna (29-mer)	polyribonucleotide		1.87619	1	6wlh	1	49	5kl6; 4r2s; 5kl3; 6b0o; 6b0q; 5kl2; 5kl4; 4r2e; 4r2p; 4r2q; 5kl7; 4r2r; 6b0r; 5kl5; 6b0p; 2jpa; 2jp9; 6wlh; 2prt; 6blw; 4r2d; 1g2d; 1g2f; 4x9j; 4r2a; 4r2c; 1p47; 1aay; 1jk1; 1a1h; 1a1i; 1a1l; 1zaa; 1jk2; 1a1k; 1a1g; 1a1j; 1a1f; 1f2i; 1llm; 1xf7; 1sp2; 1va2; 6pv0; 6pv1; 6uco; 6ucp; 6pv2; 6pv3	49	5kl6; 4r2s; 5kl3; 6b0o; 6b0q; 5kl2; 5kl4; 4r2e; 4r2p; 4r2q; 5kl7; 4r2r; 6b0r; 5kl5; 6b0p; 2jpa; 2jp9; 6wlh; 2prt; 6blw; 4r2d; 1g2d; 1g2f; 4x9j; 4r2a; 4r2c; 1p47; 1aay; 1jk1; 1a1h; 1a1i; 1a1l; 1zaa; 1jk2; 1a1k; 1a1g; 1a1j; 1a1f; 1f2i; 1llm; 1xf7; 1sp2; 1va2; 6pv0; 6pv1; 6uco; 6ucp; 6pv2; 6pv3
					5'-d(*ap*gp*cp*gp*tp*gp*gp*gp*cp*gp*g)-3'	polydeoxyribonucleotide		2.76067	1	1jk1	1	49	5kl6; 4r2s; 5kl3; 6b0o; 6b0q; 5kl2; 5kl4; 4r2e; 4r2p; 4r2q; 5kl7; 4r2r; 6b0r; 5kl5; 6b0p; 2jpa; 2jp9; 6wlh; 2prt; 6blw; 4r2d; 1g2d; 1g2f; 4x9j; 4r2a; 4r2c; 1p47; 1aay; 1jk1; 1a1h; 1a1i; 1a1l; 1zaa; 1jk2; 1a1k; 1a1g; 1a1j; 1a1f; 1f2i; 1llm; 1xf7; 1sp2; 1va2; 6pv0; 6pv1; 6uco; 6ucp; 6pv2; 6pv3	49	5kl6; 4r2s; 5kl3; 6b0o; 6b0q; 5kl2; 5kl4; 4r2e; 4r2p; 4r2q; 5kl7; 4r2r; 6b0r; 5kl5; 6b0p; 2jpa; 2jp9; 6wlh; 2prt; 6blw; 4r2d; 1g2d; 1g2f; 4x9j; 4r2a; 4r2c; 1p47; 1aay; 1jk1; 1a1h; 1a1i; 1a1l; 1zaa; 1jk2; 1a1k; 1a1g; 1a1j; 1a1f; 1f2i; 1llm; 1xf7; 1sp2; 1va2; 6pv0; 6pv1; 6uco; 6ucp; 6pv2; 6pv3
					5'-d(*ap*gp*cp*gp*tp*gp*gp*gp*cp*tp*g)-3'	polydeoxyribonucleotide		2.67006	1	1jk2	1	49	5kl6; 4r2s; 5kl3; 6b0o; 6b0q; 5kl2; 5kl4; 4r2e; 4r2p; 4r2q; 5kl7; 4r2r; 6b0r; 5kl5; 6b0p; 2jpa; 2jp9; 6wlh; 2prt; 6blw; 4r2d; 1g2d; 1g2f; 4x9j; 4r2a; 4r2c; 1p47; 1aay; 1jk1; 1a1h; 1a1i; 1a1l; 1zaa; 1jk2; 1a1k; 1a1g; 1a1j; 1a1f; 1f2i; 1llm; 1xf7; 1sp2; 1va2; 6pv0; 6pv1; 6uco; 6ucp; 6pv2; 6pv3	49	5kl6; 4r2s; 5kl3; 6b0o; 6b0q; 5kl2; 5kl4; 4r2e; 4r2p; 4r2q; 5kl7; 4r2r; 6b0r; 5kl5; 6b0p; 2jpa; 2jp9; 6wlh; 2prt; 6blw; 4r2d; 1g2d; 1g2f; 4x9j; 4r2a; 4r2c; 1p47; 1aay; 1jk1; 1a1h; 1a1i; 1a1l; 1zaa; 1jk2; 1a1k; 1a1g; 1a1j; 1a1f; 1f2i; 1llm; 1xf7; 1sp2; 1va2; 6pv0; 6pv1; 6uco; 6ucp; 6pv2; 6pv3
					dna (5'-d(*ap*gp*(5cm)p*gp*tp*gp*gp*gp*(5cm)p*gp*t)-3')	polydeoxyribonucleotide		1.87314	1	4x9j	1	49	5kl6; 4r2s; 5kl3; 6b0o; 6b0q; 5kl2; 5kl4; 4r2e; 4r2p; 4r2q; 5kl7; 4r2r; 6b0r; 5kl5; 6b0p; 2jpa; 2jp9; 6wlh; 2prt; 6blw; 4r2d; 1g2d; 1g2f; 4x9j; 4r2a; 4r2c; 1p47; 1aay; 1jk1; 1a1h; 1a1i; 1a1l; 1zaa; 1jk2; 1a1k; 1a1g; 1a1j; 1a1f; 1f2i; 1llm; 1xf7; 1sp2; 1va2; 6pv0; 6pv1; 6uco; 6ucp; 6pv2; 6pv3	49	5kl6; 4r2s; 5kl3; 6b0o; 6b0q; 5kl2; 5kl4; 4r2e; 4r2p; 4r2q; 5kl7; 4r2r; 6b0r; 5kl5; 6b0p; 2jpa; 2jp9; 6wlh; 2prt; 6blw; 4r2d; 1g2d; 1g2f; 4x9j; 4r2a; 4r2c; 1p47; 1aay; 1jk1; 1a1h; 1a1i; 1a1l; 1zaa; 1jk2; 1a1k; 1a1g; 1a1j; 1a1f; 1f2i; 1llm; 1xf7; 1sp2; 1va2; 6pv0; 6pv1; 6uco; 6ucp; 6pv2; 6pv3
					dna (5'-d(*ap*gp*cp*gp*tp*gp*gp*gp*gp*gp*t)-3')	polydeoxyribonucleotide		1.98212	1	5kl6	1	49	5kl6; 4r2s; 5kl3; 6b0o; 6b0q; 5kl2; 5kl4; 4r2e; 4r2p; 4r2q; 5kl7; 4r2r; 6b0r; 5kl5; 6b0p; 2jpa; 2jp9; 6wlh; 2prt; 6blw; 4r2d; 1g2d; 1g2f; 4x9j; 4r2a; 4r2c; 1p47; 1aay; 1jk1; 1a1h; 1a1i; 1a1l; 1zaa; 1jk2; 1a1k; 1a1g; 1a1j; 1a1f; 1f2i; 1llm; 1xf7; 1sp2; 1va2; 6pv0; 6pv1; 6uco; 6ucp; 6pv2; 6pv3	49	5kl6; 4r2s; 5kl3; 6b0o; 6b0q; 5kl2; 5kl4; 4r2e; 4r2p; 4r2q; 5kl7; 4r2r; 6b0r; 5kl5; 6b0p; 2jpa; 2jp9; 6wlh; 2prt; 6blw; 4r2d; 1g2d; 1g2f; 4x9j; 4r2a; 4r2c; 1p47; 1aay; 1jk1; 1a1h; 1a1i; 1a1l; 1zaa; 1jk2; 1a1k; 1a1g; 1a1j; 1a1f; 1f2i; 1llm; 1xf7; 1sp2; 1va2; 6pv0; 6pv1; 6uco; 6ucp; 6pv2; 6pv3
					dna (5'-d(*cp*gp*cp*gp*gp*gp*gp*gp*cp*gp*tp*cp*tp*g)-3')	polydeoxyribonucleotide		2.62331	1	2prt	1	49	5kl6; 4r2s; 5kl3; 6b0o; 6b0q; 5kl2; 5kl4; 4r2e; 4r2p; 4r2q; 5kl7; 4r2r; 6b0r; 5kl5; 6b0p; 2jpa; 2jp9; 6wlh; 2prt; 6blw; 4r2d; 1g2d; 1g2f; 4x9j; 4r2a; 4r2c; 1p47; 1aay; 1jk1; 1a1h; 1a1i; 1a1l; 1zaa; 1jk2; 1a1k; 1a1g; 1a1j; 1a1f; 1f2i; 1llm; 1xf7; 1sp2; 1va2; 6pv0; 6pv1; 6uco; 6ucp; 6pv2; 6pv3	49	5kl6; 4r2s; 5kl3; 6b0o; 6b0q; 5kl2; 5kl4; 4r2e; 4r2p; 4r2q; 5kl7; 4r2r; 6b0r; 5kl5; 6b0p; 2jpa; 2jp9; 6wlh; 2prt; 6blw; 4r2d; 1g2d; 1g2f; 4x9j; 4r2a; 4r2c; 1p47; 1aay; 1jk1; 1a1h; 1a1i; 1a1l; 1zaa; 1jk2; 1a1k; 1a1g; 1a1j; 1a1f; 1f2i; 1llm; 1xf7; 1sp2; 1va2; 6pv0; 6pv1; 6uco; 6ucp; 6pv2; 6pv3
					dna (5'-d(p*dcp*dgp*dcp*dgp*dgp*dgp*dgp*dgp*dcp*dgp*dtp*dcp*dtp*dg)-3')	polydeoxyribonucleotide		2.21989	1	2jpa	1	49	5kl6; 4r2s; 5kl3; 6b0o; 6b0q; 5kl2; 5kl4; 4r2e; 4r2p; 4r2q; 5kl7; 4r2r; 6b0r; 5kl5; 6b0p; 2jpa; 2jp9; 6wlh; 2prt; 6blw; 4r2d; 1g2d; 1g2f; 4x9j; 4r2a; 4r2c; 1p47; 1aay; 1jk1; 1a1h; 1a1i; 1a1l; 1zaa; 1jk2; 1a1k; 1a1g; 1a1j; 1a1f; 1f2i; 1llm; 1xf7; 1sp2; 1va2; 6pv0; 6pv1; 6uco; 6ucp; 6pv2; 6pv3	49	5kl6; 4r2s; 5kl3; 6b0o; 6b0q; 5kl2; 5kl4; 4r2e; 4r2p; 4r2q; 5kl7; 4r2r; 6b0r; 5kl5; 6b0p; 2jpa; 2jp9; 6wlh; 2prt; 6blw; 4r2d; 1g2d; 1g2f; 4x9j; 4r2a; 4r2c; 1p47; 1aay; 1jk1; 1a1h; 1a1i; 1a1l; 1zaa; 1jk2; 1a1k; 1a1g; 1a1j; 1a1f; 1f2i; 1llm; 1xf7; 1sp2; 1va2; 6pv0; 6pv1; 6uco; 6ucp; 6pv2; 6pv3
					dna (5'-d(p*dcp*dgp*dcp*dgp*dgp*dgp*dgp*dgp*dcp*dgp*dtp*dcp*dtp*dgp*dcp*dgp*dc)-3')	polydeoxyribonucleotide		2.23089	1	2jp9	1	49	5kl6; 4r2s; 5kl3; 6b0o; 6b0q; 5kl2; 5kl4; 4r2e; 4r2p; 4r2q; 5kl7; 4r2r; 6b0r; 5kl5; 6b0p; 2jpa; 2jp9; 6wlh; 2prt; 6blw; 4r2d; 1g2d; 1g2f; 4x9j; 4r2a; 4r2c; 1p47; 1aay; 1jk1; 1a1h; 1a1i; 1a1l; 1zaa; 1jk2; 1a1k; 1a1g; 1a1j; 1a1f; 1f2i; 1llm; 1xf7; 1sp2; 1va2; 6pv0; 6pv1; 6uco; 6ucp; 6pv2; 6pv3	49	5kl6; 4r2s; 5kl3; 6b0o; 6b0q; 5kl2; 5kl4; 4r2e; 4r2p; 4r2q; 5kl7; 4r2r; 6b0r; 5kl5; 6b0p; 2jpa; 2jp9; 6wlh; 2prt; 6blw; 4r2d; 1g2d; 1g2f; 4x9j; 4r2a; 4r2c; 1p47; 1aay; 1jk1; 1a1h; 1a1i; 1a1l; 1zaa; 1jk2; 1a1k; 1a1g; 1a1j; 1a1f; 1f2i; 1llm; 1xf7; 1sp2; 1va2; 6pv0; 6pv1; 6uco; 6ucp; 6pv2; 6pv3
					dna (5'-d(p*gp*cp*gp*ap*ap*ap*tp*gp*gp*gp*ap*gp*gp*gp*tp*t)-3')	polydeoxyribonucleotide		2.83816	1	6blw	1	49	5kl6; 4r2s; 5kl3; 6b0o; 6b0q; 5kl2; 5kl4; 4r2e; 4r2p; 4r2q; 5kl7; 4r2r; 6b0r; 5kl5; 6b0p; 2jpa; 2jp9; 6wlh; 2prt; 6blw; 4r2d; 1g2d; 1g2f; 4x9j; 4r2a; 4r2c; 1p47; 1aay; 1jk1; 1a1h; 1a1i; 1a1l; 1zaa; 1jk2; 1a1k; 1a1g; 1a1j; 1a1f; 1f2i; 1llm; 1xf7; 1sp2; 1va2; 6pv0; 6pv1; 6uco; 6ucp; 6pv2; 6pv3	49	5kl6; 4r2s; 5kl3; 6b0o; 6b0q; 5kl2; 5kl4; 4r2e; 4r2p; 4r2q; 5kl7; 4r2r; 6b0r; 5kl5; 6b0p; 2jpa; 2jp9; 6wlh; 2prt; 6blw; 4r2d; 1g2d; 1g2f; 4x9j; 4r2a; 4r2c; 1p47; 1aay; 1jk1; 1a1h; 1a1i; 1a1l; 1zaa; 1jk2; 1a1k; 1a1g; 1a1j; 1a1f; 1f2i; 1llm; 1xf7; 1sp2; 1va2; 6pv0; 6pv1; 6uco; 6ucp; 6pv2; 6pv3
					5'-d(*tp*cp*ap*gp*cp*cp*cp*ap*cp*gp*c)-3'	polydeoxyribonucleotide		4.98503	1	1jk2	1	49	5kl6; 4r2s; 5kl3; 6b0o; 6b0q; 5kl2; 5kl4; 4r2e; 4r2p; 4r2q; 5kl7; 4r2r; 6b0r; 5kl5; 6b0p; 2jpa; 2jp9; 6wlh; 2prt; 6blw; 4r2d; 1g2d; 1g2f; 4x9j; 4r2a; 4r2c; 1p47; 1aay; 1jk1; 1a1h; 1a1i; 1a1l; 1zaa; 1jk2; 1a1k; 1a1g; 1a1j; 1a1f; 1f2i; 1llm; 1xf7; 1sp2; 1va2; 6pv0; 6pv1; 6uco; 6ucp; 6pv2; 6pv3	49	5kl6; 4r2s; 5kl3; 6b0o; 6b0q; 5kl2; 5kl4; 4r2e; 4r2p; 4r2q; 5kl7; 4r2r; 6b0r; 5kl5; 6b0p; 2jpa; 2jp9; 6wlh; 2prt; 6blw; 4r2d; 1g2d; 1g2f; 4x9j; 4r2a; 4r2c; 1p47; 1aay; 1jk1; 1a1h; 1a1i; 1a1l; 1zaa; 1jk2; 1a1k; 1a1g; 1a1j; 1a1f; 1f2i; 1llm; 1xf7; 1sp2; 1va2; 6pv0; 6pv1; 6uco; 6ucp; 6pv2; 6pv3
					5'-d(*tp*cp*cp*gp*cp*cp*cp*ap*cp*gp*c)-3'	polydeoxyribonucleotide		5.01271	1	1jk1	1	49	5kl6; 4r2s; 5kl3; 6b0o; 6b0q; 5kl2; 5kl4; 4r2e; 4r2p; 4r2q; 5kl7; 4r2r; 6b0r; 5kl5; 6b0p; 2jpa; 2jp9; 6wlh; 2prt; 6blw; 4r2d; 1g2d; 1g2f; 4x9j; 4r2a; 4r2c; 1p47; 1aay; 1jk1; 1a1h; 1a1i; 1a1l; 1zaa; 1jk2; 1a1k; 1a1g; 1a1j; 1a1f; 1f2i; 1llm; 1xf7; 1sp2; 1va2; 6pv0; 6pv1; 6uco; 6ucp; 6pv2; 6pv3	49	5kl6; 4r2s; 5kl3; 6b0o; 6b0q; 5kl2; 5kl4; 4r2e; 4r2p; 4r2q; 5kl7; 4r2r; 6b0r; 5kl5; 6b0p; 2jpa; 2jp9; 6wlh; 2prt; 6blw; 4r2d; 1g2d; 1g2f; 4x9j; 4r2a; 4r2c; 1p47; 1aay; 1jk1; 1a1h; 1a1i; 1a1l; 1zaa; 1jk2; 1a1k; 1a1g; 1a1j; 1a1f; 1f2i; 1llm; 1xf7; 1sp2; 1va2; 6pv0; 6pv1; 6uco; 6ucp; 6pv2; 6pv3
					dna (5'-d(*cp*ap*gp*ap*cp*gp*cp*cp*cp*cp*cp*gp*cp*g)-3')	polydeoxyribonucleotide		5.11913	1	2prt	1	49	5kl6; 4r2s; 5kl3; 6b0o; 6b0q; 5kl2; 5kl4; 4r2e; 4r2p; 4r2q; 5kl7; 4r2r; 6b0r; 5kl5; 6b0p; 2jpa; 2jp9; 6wlh; 2prt; 6blw; 4r2d; 1g2d; 1g2f; 4x9j; 4r2a; 4r2c; 1p47; 1aay; 1jk1; 1a1h; 1a1i; 1a1l; 1zaa; 1jk2; 1a1k; 1a1g; 1a1j; 1a1f; 1f2i; 1llm; 1xf7; 1sp2; 1va2; 6pv0; 6pv1; 6uco; 6ucp; 6pv2; 6pv3	49	5kl6; 4r2s; 5kl3; 6b0o; 6b0q; 5kl2; 5kl4; 4r2e; 4r2p; 4r2q; 5kl7; 4r2r; 6b0r; 5kl5; 6b0p; 2jpa; 2jp9; 6wlh; 2prt; 6blw; 4r2d; 1g2d; 1g2f; 4x9j; 4r2a; 4r2c; 1p47; 1aay; 1jk1; 1a1h; 1a1i; 1a1l; 1zaa; 1jk2; 1a1k; 1a1g; 1a1j; 1a1f; 1f2i; 1llm; 1xf7; 1sp2; 1va2; 6pv0; 6pv1; 6uco; 6ucp; 6pv2; 6pv3
					dna (5'-d(*tp*ap*(5cm)p*gp*cp*cp*cp*ap*(5cm)p*gp*c)-3')	polydeoxyribonucleotide		3.30734	1	4x9j	1	49	5kl6; 4r2s; 5kl3; 6b0o; 6b0q; 5kl2; 5kl4; 4r2e; 4r2p; 4r2q; 5kl7; 4r2r; 6b0r; 5kl5; 6b0p; 2jpa; 2jp9; 6wlh; 2prt; 6blw; 4r2d; 1g2d; 1g2f; 4x9j; 4r2a; 4r2c; 1p47; 1aay; 1jk1; 1a1h; 1a1i; 1a1l; 1zaa; 1jk2; 1a1k; 1a1g; 1a1j; 1a1f; 1f2i; 1llm; 1xf7; 1sp2; 1va2; 6pv0; 6pv1; 6uco; 6ucp; 6pv2; 6pv3	49	5kl6; 4r2s; 5kl3; 6b0o; 6b0q; 5kl2; 5kl4; 4r2e; 4r2p; 4r2q; 5kl7; 4r2r; 6b0r; 5kl5; 6b0p; 2jpa; 2jp9; 6wlh; 2prt; 6blw; 4r2d; 1g2d; 1g2f; 4x9j; 4r2a; 4r2c; 1p47; 1aay; 1jk1; 1a1h; 1a1i; 1a1l; 1zaa; 1jk2; 1a1k; 1a1g; 1a1j; 1a1f; 1f2i; 1llm; 1xf7; 1sp2; 1va2; 6pv0; 6pv1; 6uco; 6ucp; 6pv2; 6pv3
					dna (5'-d(*tp*ap*ap*cp*cp*cp*tp*cp*cp*cp*ap*tp*tp*tp*cp*gp*c)-3')	polydeoxyribonucleotide		6.30063	1	6blw	1	49	5kl6; 4r2s; 5kl3; 6b0o; 6b0q; 5kl2; 5kl4; 4r2e; 4r2p; 4r2q; 5kl7; 4r2r; 6b0r; 5kl5; 6b0p; 2jpa; 2jp9; 6wlh; 2prt; 6blw; 4r2d; 1g2d; 1g2f; 4x9j; 4r2a; 4r2c; 1p47; 1aay; 1jk1; 1a1h; 1a1i; 1a1l; 1zaa; 1jk2; 1a1k; 1a1g; 1a1j; 1a1f; 1f2i; 1llm; 1xf7; 1sp2; 1va2; 6pv0; 6pv1; 6uco; 6ucp; 6pv2; 6pv3	49	5kl6; 4r2s; 5kl3; 6b0o; 6b0q; 5kl2; 5kl4; 4r2e; 4r2p; 4r2q; 5kl7; 4r2r; 6b0r; 5kl5; 6b0p; 2jpa; 2jp9; 6wlh; 2prt; 6blw; 4r2d; 1g2d; 1g2f; 4x9j; 4r2a; 4r2c; 1p47; 1aay; 1jk1; 1a1h; 1a1i; 1a1l; 1zaa; 1jk2; 1a1k; 1a1g; 1a1j; 1a1f; 1f2i; 1llm; 1xf7; 1sp2; 1va2; 6pv0; 6pv1; 6uco; 6ucp; 6pv2; 6pv3
					dna (5'-d(*tp*ap*cp*cp*cp*cp*cp*ap*cp*gp*c)-3')	polydeoxyribonucleotide		3.61675	1	5kl6	1	49	5kl6; 4r2s; 5kl3; 6b0o; 6b0q; 5kl2; 5kl4; 4r2e; 4r2p; 4r2q; 5kl7; 4r2r; 6b0r; 5kl5; 6b0p; 2jpa; 2jp9; 6wlh; 2prt; 6blw; 4r2d; 1g2d; 1g2f; 4x9j; 4r2a; 4r2c; 1p47; 1aay; 1jk1; 1a1h; 1a1i; 1a1l; 1zaa; 1jk2; 1a1k; 1a1g; 1a1j; 1a1f; 1f2i; 1llm; 1xf7; 1sp2; 1va2; 6pv0; 6pv1; 6uco; 6ucp; 6pv2; 6pv3	49	5kl6; 4r2s; 5kl3; 6b0o; 6b0q; 5kl2; 5kl4; 4r2e; 4r2p; 4r2q; 5kl7; 4r2r; 6b0r; 5kl5; 6b0p; 2jpa; 2jp9; 6wlh; 2prt; 6blw; 4r2d; 1g2d; 1g2f; 4x9j; 4r2a; 4r2c; 1p47; 1aay; 1jk1; 1a1h; 1a1i; 1a1l; 1zaa; 1jk2; 1a1k; 1a1g; 1a1j; 1a1f; 1f2i; 1llm; 1xf7; 1sp2; 1va2; 6pv0; 6pv1; 6uco; 6ucp; 6pv2; 6pv3
					dna (5'-d(p*dcp*dap*dgp*dap*dcp*dgp*dcp*dcp*dcp*dcp*dcp*dgp*dcp*dg)-3')	polydeoxyribonucleotide		4.23643	1	2jpa	1	49	5kl6; 4r2s; 5kl3; 6b0o; 6b0q; 5kl2; 5kl4; 4r2e; 4r2p; 4r2q; 5kl7; 4r2r; 6b0r; 5kl5; 6b0p; 2jpa; 2jp9; 6wlh; 2prt; 6blw; 4r2d; 1g2d; 1g2f; 4x9j; 4r2a; 4r2c; 1p47; 1aay; 1jk1; 1a1h; 1a1i; 1a1l; 1zaa; 1jk2; 1a1k; 1a1g; 1a1j; 1a1f; 1f2i; 1llm; 1xf7; 1sp2; 1va2; 6pv0; 6pv1; 6uco; 6ucp; 6pv2; 6pv3	49	5kl6; 4r2s; 5kl3; 6b0o; 6b0q; 5kl2; 5kl4; 4r2e; 4r2p; 4r2q; 5kl7; 4r2r; 6b0r; 5kl5; 6b0p; 2jpa; 2jp9; 6wlh; 2prt; 6blw; 4r2d; 1g2d; 1g2f; 4x9j; 4r2a; 4r2c; 1p47; 1aay; 1jk1; 1a1h; 1a1i; 1a1l; 1zaa; 1jk2; 1a1k; 1a1g; 1a1j; 1a1f; 1f2i; 1llm; 1xf7; 1sp2; 1va2; 6pv0; 6pv1; 6uco; 6ucp; 6pv2; 6pv3
					dna (5'-d(p*dgp*dcp*dgp*dcp*dap*dgp*dap*dcp*dgp*dcp*dcp*dcp*dcp*dcp*dgp*dcp*dg)-3')	polydeoxyribonucleotide		4.20135	1	2jp9	1	49	5kl6; 4r2s; 5kl3; 6b0o; 6b0q; 5kl2; 5kl4; 4r2e; 4r2p; 4r2q; 5kl7; 4r2r; 6b0r; 5kl5; 6b0p; 2jpa; 2jp9; 6wlh; 2prt; 6blw; 4r2d; 1g2d; 1g2f; 4x9j; 4r2a; 4r2c; 1p47; 1aay; 1jk1; 1a1h; 1a1i; 1a1l; 1zaa; 1jk2; 1a1k; 1a1g; 1a1j; 1a1f; 1f2i; 1llm; 1xf7; 1sp2; 1va2; 6pv0; 6pv1; 6uco; 6ucp; 6pv2; 6pv3	49	5kl6; 4r2s; 5kl3; 6b0o; 6b0q; 5kl2; 5kl4; 4r2e; 4r2p; 4r2q; 5kl7; 4r2r; 6b0r; 5kl5; 6b0p; 2jpa; 2jp9; 6wlh; 2prt; 6blw; 4r2d; 1g2d; 1g2f; 4x9j; 4r2a; 4r2c; 1p47; 1aay; 1jk1; 1a1h; 1a1i; 1a1l; 1zaa; 1jk2; 1a1k; 1a1g; 1a1j; 1a1f; 1f2i; 1llm; 1xf7; 1sp2; 1va2; 6pv0; 6pv1; 6uco; 6ucp; 6pv2; 6pv3
					sodium ion	bound		7.66245	1	5kl2	1	49	5kl6; 4r2s; 5kl3; 6b0o; 6b0q; 5kl2; 5kl4; 4r2e; 4r2p; 4r2q; 5kl7; 4r2r; 6b0r; 5kl5; 6b0p; 2jpa; 2jp9; 6wlh; 2prt; 6blw; 4r2d; 1g2d; 1g2f; 4x9j; 4r2a; 4r2c; 1p47; 1aay; 1jk1; 1a1h; 1a1i; 1a1l; 1zaa; 1jk2; 1a1k; 1a1g; 1a1j; 1a1f; 1f2i; 1llm; 1xf7; 1sp2; 1va2; 6pv0; 6pv1; 6uco; 6ucp; 6pv2; 6pv3	49	5kl6; 4r2s; 5kl3; 6b0o; 6b0q; 5kl2; 5kl4; 4r2e; 4r2p; 4r2q; 5kl7; 4r2r; 6b0r; 5kl5; 6b0p; 2jpa; 2jp9; 6wlh; 2prt; 6blw; 4r2d; 1g2d; 1g2f; 4x9j; 4r2a; 4r2c; 1p47; 1aay; 1jk1; 1a1h; 1a1i; 1a1l; 1zaa; 1jk2; 1a1k; 1a1g; 1a1j; 1a1f; 1f2i; 1llm; 1xf7; 1sp2; 1va2; 6pv0; 6pv1; 6uco; 6ucp; 6pv2; 6pv3
					zinc ion	bound	ZN	7.67823	1	1va2	0	49	5kl6; 4r2s; 5kl3; 6b0o; 6b0q; 5kl2; 5kl4; 4r2e; 4r2p; 4r2q; 5kl7; 4r2r; 6b0r; 5kl5; 6b0p; 2jpa; 2jp9; 6wlh; 2prt; 6blw; 4r2d; 1g2d; 1g2f; 4x9j; 4r2a; 4r2c; 1p47; 1aay; 1jk1; 1a1h; 1a1i; 1a1l; 1zaa; 1jk2; 1a1k; 1a1g; 1a1j; 1a1f; 1f2i; 1llm; 1xf7; 1sp2; 1va2; 6pv0; 6pv1; 6uco; 6ucp; 6pv2; 6pv3	49	5kl6; 4r2s; 5kl3; 6b0o; 6b0q; 5kl2; 5kl4; 4r2e; 4r2p; 4r2q; 5kl7; 4r2r; 6b0r; 5kl5; 6b0p; 2jpa; 2jp9; 6wlh; 2prt; 6blw; 4r2d; 1g2d; 1g2f; 4x9j; 4r2a; 4r2c; 1p47; 1aay; 1jk1; 1a1h; 1a1i; 1a1l; 1zaa; 1jk2; 1a1k; 1a1g; 1a1j; 1a1f; 1f2i; 1llm; 1xf7; 1sp2; 1va2; 6pv0; 6pv1; 6uco; 6ucp; 6pv2; 6pv3
			E347K	-5.749	dna (5'-d(*tp*ap*(5cm)p*gp*cp*cp*cp*ap*cp*gp*c)-3')	polydeoxyribonucleotide		5.75047	7	4r2s; 5kl4; 4r2e; 5kl7; 4r2r; 5kl5; 4r2a	7	40	5kl6; 4r2s; 5kl3; 6b0o; 6b0q; 5kl2; 5kl4; 4r2e; 4r2p; 4r2q; 5kl7; 4r2r; 6b0r; 5kl5; 6b0p; 2jpa; 2jp9; 6wlh; 2prt; 4r2d; 1g2d; 1g2f; 4x9j; 4r2a; 4r2c; 1p47; 1aay; 1jk1; 1a1h; 1a1i; 1a1l; 1zaa; 1jk2; 1a1k; 1a1g; 1a1j; 1a1f; 1llm; 1va3; 1sp1	40	5kl6; 4r2s; 5kl3; 6b0o; 6b0q; 5kl2; 5kl4; 4r2e; 4r2p; 4r2q; 5kl7; 4r2r; 6b0r; 5kl5; 6b0p; 2jpa; 2jp9; 6wlh; 2prt; 4r2d; 1g2d; 1g2f; 4x9j; 4r2a; 4r2c; 1p47; 1aay; 1jk1; 1a1h; 1a1i; 1a1l; 1zaa; 1jk2; 1a1k; 1a1g; 1a1j; 1a1f; 1llm; 1va3; 1sp1
					dna (5'-d(*tp*ap*cp*gp*cp*cp*cp*ap*cp*gp*c)-3')	polydeoxyribonucleotide		7.00832	4	1aay; 1zaa; 1a1g; 1a1j	4	40	5kl6; 4r2s; 5kl3; 6b0o; 6b0q; 5kl2; 5kl4; 4r2e; 4r2p; 4r2q; 5kl7; 4r2r; 6b0r; 5kl5; 6b0p; 2jpa; 2jp9; 6wlh; 2prt; 4r2d; 1g2d; 1g2f; 4x9j; 4r2a; 4r2c; 1p47; 1aay; 1jk1; 1a1h; 1a1i; 1a1l; 1zaa; 1jk2; 1a1k; 1a1g; 1a1j; 1a1f; 1llm; 1va3; 1sp1	40	5kl6; 4r2s; 5kl3; 6b0o; 6b0q; 5kl2; 5kl4; 4r2e; 4r2p; 4r2q; 5kl7; 4r2r; 6b0r; 5kl5; 6b0p; 2jpa; 2jp9; 6wlh; 2prt; 4r2d; 1g2d; 1g2f; 4x9j; 4r2a; 4r2c; 1p47; 1aay; 1jk1; 1a1h; 1a1i; 1a1l; 1zaa; 1jk2; 1a1k; 1a1g; 1a1j; 1a1f; 1llm; 1va3; 1sp1
					dna (5'-d(*ap*gp*cp*gp*tp*gp*gp*gp*cp*gp*t)-3')	polydeoxyribonucleotide		3.78981	4	1aay; 1zaa; 1a1g; 1a1j	4	40	5kl6; 4r2s; 5kl3; 6b0o; 6b0q; 5kl2; 5kl4; 4r2e; 4r2p; 4r2q; 5kl7; 4r2r; 6b0r; 5kl5; 6b0p; 2jpa; 2jp9; 6wlh; 2prt; 4r2d; 1g2d; 1g2f; 4x9j; 4r2a; 4r2c; 1p47; 1aay; 1jk1; 1a1h; 1a1i; 1a1l; 1zaa; 1jk2; 1a1k; 1a1g; 1a1j; 1a1f; 1llm; 1va3; 1sp1	40	5kl6; 4r2s; 5kl3; 6b0o; 6b0q; 5kl2; 5kl4; 4r2e; 4r2p; 4r2q; 5kl7; 4r2r; 6b0r; 5kl5; 6b0p; 2jpa; 2jp9; 6wlh; 2prt; 4r2d; 1g2d; 1g2f; 4x9j; 4r2a; 4r2c; 1p47; 1aay; 1jk1; 1a1h; 1a1i; 1a1l; 1zaa; 1jk2; 1a1k; 1a1g; 1a1j; 1a1f; 1llm; 1va3; 1sp1
					dna (5'-d(*ap*gp*cp*gp*tp*gp*gp*gp*(5fc)p*gp*t)-3')	polydeoxyribonucleotide		2.75728	3	5kl4; 4r2q; 4r2d	3	40	5kl6; 4r2s; 5kl3; 6b0o; 6b0q; 5kl2; 5kl4; 4r2e; 4r2p; 4r2q; 5kl7; 4r2r; 6b0r; 5kl5; 6b0p; 2jpa; 2jp9; 6wlh; 2prt; 4r2d; 1g2d; 1g2f; 4x9j; 4r2a; 4r2c; 1p47; 1aay; 1jk1; 1a1h; 1a1i; 1a1l; 1zaa; 1jk2; 1a1k; 1a1g; 1a1j; 1a1f; 1llm; 1va3; 1sp1	40	5kl6; 4r2s; 5kl3; 6b0o; 6b0q; 5kl2; 5kl4; 4r2e; 4r2p; 4r2q; 5kl7; 4r2r; 6b0r; 5kl5; 6b0p; 2jpa; 2jp9; 6wlh; 2prt; 4r2d; 1g2d; 1g2f; 4x9j; 4r2a; 4r2c; 1p47; 1aay; 1jk1; 1a1h; 1a1i; 1a1l; 1zaa; 1jk2; 1a1k; 1a1g; 1a1j; 1a1f; 1llm; 1va3; 1sp1
					dna (5'-d(*ap*gp*cp*gp*tp*gp*gp*gp*cp*ap*c)-3')	polydeoxyribonucleotide		4.21642	3	1a1h; 1a1i; 1a1l	3	40	5kl6; 4r2s; 5kl3; 6b0o; 6b0q; 5kl2; 5kl4; 4r2e; 4r2p; 4r2q; 5kl7; 4r2r; 6b0r; 5kl5; 6b0p; 2jpa; 2jp9; 6wlh; 2prt; 4r2d; 1g2d; 1g2f; 4x9j; 4r2a; 4r2c; 1p47; 1aay; 1jk1; 1a1h; 1a1i; 1a1l; 1zaa; 1jk2; 1a1k; 1a1g; 1a1j; 1a1f; 1llm; 1va3; 1sp1	40	5kl6; 4r2s; 5kl3; 6b0o; 6b0q; 5kl2; 5kl4; 4r2e; 4r2p; 4r2q; 5kl7; 4r2r; 6b0r; 5kl5; 6b0p; 2jpa; 2jp9; 6wlh; 2prt; 4r2d; 1g2d; 1g2f; 4x9j; 4r2a; 4r2c; 1p47; 1aay; 1jk1; 1a1h; 1a1i; 1a1l; 1zaa; 1jk2; 1a1k; 1a1g; 1a1j; 1a1f; 1llm; 1va3; 1sp1
					dna (5'-d(*tp*gp*tp*gp*cp*cp*cp*ap*cp*gp*c)-3')	polydeoxyribonucleotide		6.94887	3	1a1h; 1a1i; 1a1l	3	40	5kl6; 4r2s; 5kl3; 6b0o; 6b0q; 5kl2; 5kl4; 4r2e; 4r2p; 4r2q; 5kl7; 4r2r; 6b0r; 5kl5; 6b0p; 2jpa; 2jp9; 6wlh; 2prt; 4r2d; 1g2d; 1g2f; 4x9j; 4r2a; 4r2c; 1p47; 1aay; 1jk1; 1a1h; 1a1i; 1a1l; 1zaa; 1jk2; 1a1k; 1a1g; 1a1j; 1a1f; 1llm; 1va3; 1sp1	40	5kl6; 4r2s; 5kl3; 6b0o; 6b0q; 5kl2; 5kl4; 4r2e; 4r2p; 4r2q; 5kl7; 4r2r; 6b0r; 5kl5; 6b0p; 2jpa; 2jp9; 6wlh; 2prt; 4r2d; 1g2d; 1g2f; 4x9j; 4r2a; 4r2c; 1p47; 1aay; 1jk1; 1a1h; 1a1i; 1a1l; 1zaa; 1jk2; 1a1k; 1a1g; 1a1j; 1a1f; 1llm; 1va3; 1sp1
					dna (5'-d(*ap*gp*cp*gp*tp*gp*gp*gp*(1cc)p*gp*t)-3')	polydeoxyribonucleotide		2.48546	3	5kl7; 4r2r; 5kl5	3	40	5kl6; 4r2s; 5kl3; 6b0o; 6b0q; 5kl2; 5kl4; 4r2e; 4r2p; 4r2q; 5kl7; 4r2r; 6b0r; 5kl5; 6b0p; 2jpa; 2jp9; 6wlh; 2prt; 4r2d; 1g2d; 1g2f; 4x9j; 4r2a; 4r2c; 1p47; 1aay; 1jk1; 1a1h; 1a1i; 1a1l; 1zaa; 1jk2; 1a1k; 1a1g; 1a1j; 1a1f; 1llm; 1va3; 1sp1	40	5kl6; 4r2s; 5kl3; 6b0o; 6b0q; 5kl2; 5kl4; 4r2e; 4r2p; 4r2q; 5kl7; 4r2r; 6b0r; 5kl5; 6b0p; 2jpa; 2jp9; 6wlh; 2prt; 4r2d; 1g2d; 1g2f; 4x9j; 4r2a; 4r2c; 1p47; 1aay; 1jk1; 1a1h; 1a1i; 1a1l; 1zaa; 1jk2; 1a1k; 1a1g; 1a1j; 1a1f; 1llm; 1va3; 1sp1
					dna (5'-d(*ap*gp*cp*gp*tp*gp*gp*gp*(5cm)p*gp*t)-3')	polydeoxyribonucleotide		3.80049	3	4r2s; 4r2e; 4r2a	3	40	5kl6; 4r2s; 5kl3; 6b0o; 6b0q; 5kl2; 5kl4; 4r2e; 4r2p; 4r2q; 5kl7; 4r2r; 6b0r; 5kl5; 6b0p; 2jpa; 2jp9; 6wlh; 2prt; 4r2d; 1g2d; 1g2f; 4x9j; 4r2a; 4r2c; 1p47; 1aay; 1jk1; 1a1h; 1a1i; 1a1l; 1zaa; 1jk2; 1a1k; 1a1g; 1a1j; 1a1f; 1llm; 1va3; 1sp1	40	5kl6; 4r2s; 5kl3; 6b0o; 6b0q; 5kl2; 5kl4; 4r2e; 4r2p; 4r2q; 5kl7; 4r2r; 6b0r; 5kl5; 6b0p; 2jpa; 2jp9; 6wlh; 2prt; 4r2d; 1g2d; 1g2f; 4x9j; 4r2a; 4r2c; 1p47; 1aay; 1jk1; 1a1h; 1a1i; 1a1l; 1zaa; 1jk2; 1a1k; 1a1g; 1a1j; 1a1f; 1llm; 1va3; 1sp1
					5'-d(*gp*ap*cp*gp*cp*tp*ap*tp*ap*ap*ap*ap*gp*gp*ap*g)-3'	polydeoxyribonucleotide		3.05573	2	1g2d; 1g2f	0	40	5kl6; 4r2s; 5kl3; 6b0o; 6b0q; 5kl2; 5kl4; 4r2e; 4r2p; 4r2q; 5kl7; 4r2r; 6b0r; 5kl5; 6b0p; 2jpa; 2jp9; 6wlh; 2prt; 4r2d; 1g2d; 1g2f; 4x9j; 4r2a; 4r2c; 1p47; 1aay; 1jk1; 1a1h; 1a1i; 1a1l; 1zaa; 1jk2; 1a1k; 1a1g; 1a1j; 1a1f; 1llm; 1va3; 1sp1	40	5kl6; 4r2s; 5kl3; 6b0o; 6b0q; 5kl2; 5kl4; 4r2e; 4r2p; 4r2q; 5kl7; 4r2r; 6b0r; 5kl5; 6b0p; 2jpa; 2jp9; 6wlh; 2prt; 4r2d; 1g2d; 1g2f; 4x9j; 4r2a; 4r2c; 1p47; 1aay; 1jk1; 1a1h; 1a1i; 1a1l; 1zaa; 1jk2; 1a1k; 1a1g; 1a1j; 1a1f; 1llm; 1va3; 1sp1
					5'-d(*tp*cp*cp*tp*tp*tp*tp*ap*tp*ap*gp*cp*gp*tp*cp*c)-3'	polydeoxyribonucleotide		5.55243	2	1g2d; 1g2f	0	40	5kl6; 4r2s; 5kl3; 6b0o; 6b0q; 5kl2; 5kl4; 4r2e; 4r2p; 4r2q; 5kl7; 4r2r; 6b0r; 5kl5; 6b0p; 2jpa; 2jp9; 6wlh; 2prt; 4r2d; 1g2d; 1g2f; 4x9j; 4r2a; 4r2c; 1p47; 1aay; 1jk1; 1a1h; 1a1i; 1a1l; 1zaa; 1jk2; 1a1k; 1a1g; 1a1j; 1a1f; 1llm; 1va3; 1sp1	40	5kl6; 4r2s; 5kl3; 6b0o; 6b0q; 5kl2; 5kl4; 4r2e; 4r2p; 4r2q; 5kl7; 4r2r; 6b0r; 5kl5; 6b0p; 2jpa; 2jp9; 6wlh; 2prt; 4r2d; 1g2d; 1g2f; 4x9j; 4r2a; 4r2c; 1p47; 1aay; 1jk1; 1a1h; 1a1i; 1a1l; 1zaa; 1jk2; 1a1k; 1a1g; 1a1j; 1a1f; 1llm; 1va3; 1sp1
					dna (5'-d(*tp*ap*cp*tp*cp*cp*cp*ap*cp*gp*c)-3')	polydeoxyribonucleotide		5.82945	2	5kl3; 5kl2	2	40	5kl6; 4r2s; 5kl3; 6b0o; 6b0q; 5kl2; 5kl4; 4r2e; 4r2p; 4r2q; 5kl7; 4r2r; 6b0r; 5kl5; 6b0p; 2jpa; 2jp9; 6wlh; 2prt; 4r2d; 1g2d; 1g2f; 4x9j; 4r2a; 4r2c; 1p47; 1aay; 1jk1; 1a1h; 1a1i; 1a1l; 1zaa; 1jk2; 1a1k; 1a1g; 1a1j; 1a1f; 1llm; 1va3; 1sp1	40	5kl6; 4r2s; 5kl3; 6b0o; 6b0q; 5kl2; 5kl4; 4r2e; 4r2p; 4r2q; 5kl7; 4r2r; 6b0r; 5kl5; 6b0p; 2jpa; 2jp9; 6wlh; 2prt; 4r2d; 1g2d; 1g2f; 4x9j; 4r2a; 4r2c; 1p47; 1aay; 1jk1; 1a1h; 1a1i; 1a1l; 1zaa; 1jk2; 1a1k; 1a1g; 1a1j; 1a1f; 1llm; 1va3; 1sp1
					dna (5'-d(*ap*gp*cp*gp*tp*gp*gp*gp*ap*cp*c)-3')	polydeoxyribonucleotide		3.75971	2	1a1k; 1a1f	2	40	5kl6; 4r2s; 5kl3; 6b0o; 6b0q; 5kl2; 5kl4; 4r2e; 4r2p; 4r2q; 5kl7; 4r2r; 6b0r; 5kl5; 6b0p; 2jpa; 2jp9; 6wlh; 2prt; 4r2d; 1g2d; 1g2f; 4x9j; 4r2a; 4r2c; 1p47; 1aay; 1jk1; 1a1h; 1a1i; 1a1l; 1zaa; 1jk2; 1a1k; 1a1g; 1a1j; 1a1f; 1llm; 1va3; 1sp1	40	5kl6; 4r2s; 5kl3; 6b0o; 6b0q; 5kl2; 5kl4; 4r2e; 4r2p; 4r2q; 5kl7; 4r2r; 6b0r; 5kl5; 6b0p; 2jpa; 2jp9; 6wlh; 2prt; 4r2d; 1g2d; 1g2f; 4x9j; 4r2a; 4r2c; 1p47; 1aay; 1jk1; 1a1h; 1a1i; 1a1l; 1zaa; 1jk2; 1a1k; 1a1g; 1a1j; 1a1f; 1llm; 1va3; 1sp1
					dna (5'-d(*ap*gp*cp*gp*tp*gp*gp*gp*ap*gp*t)-3')	polydeoxyribonucleotide		2.85702	2	5kl3; 5kl2	2	40	5kl6; 4r2s; 5kl3; 6b0o; 6b0q; 5kl2; 5kl4; 4r2e; 4r2p; 4r2q; 5kl7; 4r2r; 6b0r; 5kl5; 6b0p; 2jpa; 2jp9; 6wlh; 2prt; 4r2d; 1g2d; 1g2f; 4x9j; 4r2a; 4r2c; 1p47; 1aay; 1jk1; 1a1h; 1a1i; 1a1l; 1zaa; 1jk2; 1a1k; 1a1g; 1a1j; 1a1f; 1llm; 1va3; 1sp1	40	5kl6; 4r2s; 5kl3; 6b0o; 6b0q; 5kl2; 5kl4; 4r2e; 4r2p; 4r2q; 5kl7; 4r2r; 6b0r; 5kl5; 6b0p; 2jpa; 2jp9; 6wlh; 2prt; 4r2d; 1g2d; 1g2f; 4x9j; 4r2a; 4r2c; 1p47; 1aay; 1jk1; 1a1h; 1a1i; 1a1l; 1zaa; 1jk2; 1a1k; 1a1g; 1a1j; 1a1f; 1llm; 1va3; 1sp1
					dna (5'-d(*tp*ap*(5fc)p*gp*cp*cp*cp*ap*cp*gp*c)-3')	polydeoxyribonucleotide		6.33878	2	4r2q; 4r2d	2	40	5kl6; 4r2s; 5kl3; 6b0o; 6b0q; 5kl2; 5kl4; 4r2e; 4r2p; 4r2q; 5kl7; 4r2r; 6b0r; 5kl5; 6b0p; 2jpa; 2jp9; 6wlh; 2prt; 4r2d; 1g2d; 1g2f; 4x9j; 4r2a; 4r2c; 1p47; 1aay; 1jk1; 1a1h; 1a1i; 1a1l; 1zaa; 1jk2; 1a1k; 1a1g; 1a1j; 1a1f; 1llm; 1va3; 1sp1	40	5kl6; 4r2s; 5kl3; 6b0o; 6b0q; 5kl2; 5kl4; 4r2e; 4r2p; 4r2q; 5kl7; 4r2r; 6b0r; 5kl5; 6b0p; 2jpa; 2jp9; 6wlh; 2prt; 4r2d; 1g2d; 1g2f; 4x9j; 4r2a; 4r2c; 1p47; 1aay; 1jk1; 1a1h; 1a1i; 1a1l; 1zaa; 1jk2; 1a1k; 1a1g; 1a1j; 1a1f; 1llm; 1va3; 1sp1
					dna (5'-d(*tp*ap*(5hc)p*gp*cp*cp*cp*ap*cp*gp*c)-3')	polydeoxyribonucleotide		6.52517	2	4r2p; 4r2c	2	40	5kl6; 4r2s; 5kl3; 6b0o; 6b0q; 5kl2; 5kl4; 4r2e; 4r2p; 4r2q; 5kl7; 4r2r; 6b0r; 5kl5; 6b0p; 2jpa; 2jp9; 6wlh; 2prt; 4r2d; 1g2d; 1g2f; 4x9j; 4r2a; 4r2c; 1p47; 1aay; 1jk1; 1a1h; 1a1i; 1a1l; 1zaa; 1jk2; 1a1k; 1a1g; 1a1j; 1a1f; 1llm; 1va3; 1sp1	40	5kl6; 4r2s; 5kl3; 6b0o; 6b0q; 5kl2; 5kl4; 4r2e; 4r2p; 4r2q; 5kl7; 4r2r; 6b0r; 5kl5; 6b0p; 2jpa; 2jp9; 6wlh; 2prt; 4r2d; 1g2d; 1g2f; 4x9j; 4r2a; 4r2c; 1p47; 1aay; 1jk1; 1a1h; 1a1i; 1a1l; 1zaa; 1jk2; 1a1k; 1a1g; 1a1j; 1a1f; 1llm; 1va3; 1sp1
					dna (5'-d(*tp*gp*gp*tp*cp*cp*cp*ap*cp*gp*c)-3')	polydeoxyribonucleotide		7.00505	2	1a1k; 1a1f	2	40	5kl6; 4r2s; 5kl3; 6b0o; 6b0q; 5kl2; 5kl4; 4r2e; 4r2p; 4r2q; 5kl7; 4r2r; 6b0r; 5kl5; 6b0p; 2jpa; 2jp9; 6wlh; 2prt; 4r2d; 1g2d; 1g2f; 4x9j; 4r2a; 4r2c; 1p47; 1aay; 1jk1; 1a1h; 1a1i; 1a1l; 1zaa; 1jk2; 1a1k; 1a1g; 1a1j; 1a1f; 1llm; 1va3; 1sp1	40	5kl6; 4r2s; 5kl3; 6b0o; 6b0q; 5kl2; 5kl4; 4r2e; 4r2p; 4r2q; 5kl7; 4r2r; 6b0r; 5kl5; 6b0p; 2jpa; 2jp9; 6wlh; 2prt; 4r2d; 1g2d; 1g2f; 4x9j; 4r2a; 4r2c; 1p47; 1aay; 1jk1; 1a1h; 1a1i; 1a1l; 1zaa; 1jk2; 1a1k; 1a1g; 1a1j; 1a1f; 1llm; 1va3; 1sp1
					dna (5'-d(*ap*gp*cp*gp*tp*gp*gp*gp*(5hc)p*gp*t)-3')	polydeoxyribonucleotide		3.81873	2	4r2p; 4r2c	2	40	5kl6; 4r2s; 5kl3; 6b0o; 6b0q; 5kl2; 5kl4; 4r2e; 4r2p; 4r2q; 5kl7; 4r2r; 6b0r; 5kl5; 6b0p; 2jpa; 2jp9; 6wlh; 2prt; 4r2d; 1g2d; 1g2f; 4x9j; 4r2a; 4r2c; 1p47; 1aay; 1jk1; 1a1h; 1a1i; 1a1l; 1zaa; 1jk2; 1a1k; 1a1g; 1a1j; 1a1f; 1llm; 1va3; 1sp1	40	5kl6; 4r2s; 5kl3; 6b0o; 6b0q; 5kl2; 5kl4; 4r2e; 4r2p; 4r2q; 5kl7; 4r2r; 6b0r; 5kl5; 6b0p; 2jpa; 2jp9; 6wlh; 2prt; 4r2d; 1g2d; 1g2f; 4x9j; 4r2a; 4r2c; 1p47; 1aay; 1jk1; 1a1h; 1a1i; 1a1l; 1zaa; 1jk2; 1a1k; 1a1g; 1a1j; 1a1f; 1llm; 1va3; 1sp1
					5'-d(*tp*cp*cp*cp*ap*cp*gp*cp*gp*tp*gp*gp*g)-3'	polydeoxyribonucleotide		3.11099	1	1llm	1	40	5kl6; 4r2s; 5kl3; 6b0o; 6b0q; 5kl2; 5kl4; 4r2e; 4r2p; 4r2q; 5kl7; 4r2r; 6b0r; 5kl5; 6b0p; 2jpa; 2jp9; 6wlh; 2prt; 4r2d; 1g2d; 1g2f; 4x9j; 4r2a; 4r2c; 1p47; 1aay; 1jk1; 1a1h; 1a1i; 1a1l; 1zaa; 1jk2; 1a1k; 1a1g; 1a1j; 1a1f; 1llm; 1va3; 1sp1	40	5kl6; 4r2s; 5kl3; 6b0o; 6b0q; 5kl2; 5kl4; 4r2e; 4r2p; 4r2q; 5kl7; 4r2r; 6b0r; 5kl5; 6b0p; 2jpa; 2jp9; 6wlh; 2prt; 4r2d; 1g2d; 1g2f; 4x9j; 4r2a; 4r2c; 1p47; 1aay; 1jk1; 1a1h; 1a1i; 1a1l; 1zaa; 1jk2; 1a1k; 1a1g; 1a1j; 1a1f; 1llm; 1va3; 1sp1
					5'-d(*gp*tp*gp*gp*cp*gp*tp*gp*gp*gp*cp*gp*gp*cp*gp*tp*gp*gp*gp*cp*gp*t)-3'	polydeoxyribonucleotide		3.32502	1	1p47	1	40	5kl6; 4r2s; 5kl3; 6b0o; 6b0q; 5kl2; 5kl4; 4r2e; 4r2p; 4r2q; 5kl7; 4r2r; 6b0r; 5kl5; 6b0p; 2jpa; 2jp9; 6wlh; 2prt; 4r2d; 1g2d; 1g2f; 4x9j; 4r2a; 4r2c; 1p47; 1aay; 1jk1; 1a1h; 1a1i; 1a1l; 1zaa; 1jk2; 1a1k; 1a1g; 1a1j; 1a1f; 1llm; 1va3; 1sp1	40	5kl6; 4r2s; 5kl3; 6b0o; 6b0q; 5kl2; 5kl4; 4r2e; 4r2p; 4r2q; 5kl7; 4r2r; 6b0r; 5kl5; 6b0p; 2jpa; 2jp9; 6wlh; 2prt; 4r2d; 1g2d; 1g2f; 4x9j; 4r2a; 4r2c; 1p47; 1aay; 1jk1; 1a1h; 1a1i; 1a1l; 1zaa; 1jk2; 1a1k; 1a1g; 1a1j; 1a1f; 1llm; 1va3; 1sp1
					5'-d(*cp*ap*cp*gp*cp*cp*cp*ap*cp*gp*cp*cp*gp*cp*cp*cp*ap*cp*gp*cp*cp*a)-3'	polydeoxyribonucleotide		6.89662	1	1p47	1	40	5kl6; 4r2s; 5kl3; 6b0o; 6b0q; 5kl2; 5kl4; 4r2e; 4r2p; 4r2q; 5kl7; 4r2r; 6b0r; 5kl5; 6b0p; 2jpa; 2jp9; 6wlh; 2prt; 4r2d; 1g2d; 1g2f; 4x9j; 4r2a; 4r2c; 1p47; 1aay; 1jk1; 1a1h; 1a1i; 1a1l; 1zaa; 1jk2; 1a1k; 1a1g; 1a1j; 1a1f; 1llm; 1va3; 1sp1	40	5kl6; 4r2s; 5kl3; 6b0o; 6b0q; 5kl2; 5kl4; 4r2e; 4r2p; 4r2q; 5kl7; 4r2r; 6b0r; 5kl5; 6b0p; 2jpa; 2jp9; 6wlh; 2prt; 4r2d; 1g2d; 1g2f; 4x9j; 4r2a; 4r2c; 1p47; 1aay; 1jk1; 1a1h; 1a1i; 1a1l; 1zaa; 1jk2; 1a1k; 1a1g; 1a1j; 1a1f; 1llm; 1va3; 1sp1
					dna (5'-d(*tp*ap*cp*ap*cp*tp*cp*cp*cp*ap*cp*gp*c)-3')	polydeoxyribonucleotide		7.19473	1	6b0o	1	40	5kl6; 4r2s; 5kl3; 6b0o; 6b0q; 5kl2; 5kl4; 4r2e; 4r2p; 4r2q; 5kl7; 4r2r; 6b0r; 5kl5; 6b0p; 2jpa; 2jp9; 6wlh; 2prt; 4r2d; 1g2d; 1g2f; 4x9j; 4r2a; 4r2c; 1p47; 1aay; 1jk1; 1a1h; 1a1i; 1a1l; 1zaa; 1jk2; 1a1k; 1a1g; 1a1j; 1a1f; 1llm; 1va3; 1sp1	40	5kl6; 4r2s; 5kl3; 6b0o; 6b0q; 5kl2; 5kl4; 4r2e; 4r2p; 4r2q; 5kl7; 4r2r; 6b0r; 5kl5; 6b0p; 2jpa; 2jp9; 6wlh; 2prt; 4r2d; 1g2d; 1g2f; 4x9j; 4r2a; 4r2c; 1p47; 1aay; 1jk1; 1a1h; 1a1i; 1a1l; 1zaa; 1jk2; 1a1k; 1a1g; 1a1j; 1a1f; 1llm; 1va3; 1sp1
					dna (5'-d(p*ap*cp*cp*cp*tp*cp*cp*cp*ap*cp*gp*c)-3')	polydeoxyribonucleotide		7.30418	1	6b0p	1	40	5kl6; 4r2s; 5kl3; 6b0o; 6b0q; 5kl2; 5kl4; 4r2e; 4r2p; 4r2q; 5kl7; 4r2r; 6b0r; 5kl5; 6b0p; 2jpa; 2jp9; 6wlh; 2prt; 4r2d; 1g2d; 1g2f; 4x9j; 4r2a; 4r2c; 1p47; 1aay; 1jk1; 1a1h; 1a1i; 1a1l; 1zaa; 1jk2; 1a1k; 1a1g; 1a1j; 1a1f; 1llm; 1va3; 1sp1	40	5kl6; 4r2s; 5kl3; 6b0o; 6b0q; 5kl2; 5kl4; 4r2e; 4r2p; 4r2q; 5kl7; 4r2r; 6b0r; 5kl5; 6b0p; 2jpa; 2jp9; 6wlh; 2prt; 4r2d; 1g2d; 1g2f; 4x9j; 4r2a; 4r2c; 1p47; 1aay; 1jk1; 1a1h; 1a1i; 1a1l; 1zaa; 1jk2; 1a1k; 1a1g; 1a1j; 1a1f; 1llm; 1va3; 1sp1
					dna (5'-d(*ap*gp*cp*gp*tp*gp*gp*gp*ap*gp*gp*gp*tp*tp*a)-3')	polydeoxyribonucleotide		3.93082	1	6b0r	1	40	5kl6; 4r2s; 5kl3; 6b0o; 6b0q; 5kl2; 5kl4; 4r2e; 4r2p; 4r2q; 5kl7; 4r2r; 6b0r; 5kl5; 6b0p; 2jpa; 2jp9; 6wlh; 2prt; 4r2d; 1g2d; 1g2f; 4x9j; 4r2a; 4r2c; 1p47; 1aay; 1jk1; 1a1h; 1a1i; 1a1l; 1zaa; 1jk2; 1a1k; 1a1g; 1a1j; 1a1f; 1llm; 1va3; 1sp1	40	5kl6; 4r2s; 5kl3; 6b0o; 6b0q; 5kl2; 5kl4; 4r2e; 4r2p; 4r2q; 5kl7; 4r2r; 6b0r; 5kl5; 6b0p; 2jpa; 2jp9; 6wlh; 2prt; 4r2d; 1g2d; 1g2f; 4x9j; 4r2a; 4r2c; 1p47; 1aay; 1jk1; 1a1h; 1a1i; 1a1l; 1zaa; 1jk2; 1a1k; 1a1g; 1a1j; 1a1f; 1llm; 1va3; 1sp1
					dna (5'-d(*ap*gp*cp*gp*tp*gp*gp*gp*ap*gp*tp*gp*t)-3')	polydeoxyribonucleotide		3.34655	1	6b0o	1	40	5kl6; 4r2s; 5kl3; 6b0o; 6b0q; 5kl2; 5kl4; 4r2e; 4r2p; 4r2q; 5kl7; 4r2r; 6b0r; 5kl5; 6b0p; 2jpa; 2jp9; 6wlh; 2prt; 4r2d; 1g2d; 1g2f; 4x9j; 4r2a; 4r2c; 1p47; 1aay; 1jk1; 1a1h; 1a1i; 1a1l; 1zaa; 1jk2; 1a1k; 1a1g; 1a1j; 1a1f; 1llm; 1va3; 1sp1	40	5kl6; 4r2s; 5kl3; 6b0o; 6b0q; 5kl2; 5kl4; 4r2e; 4r2p; 4r2q; 5kl7; 4r2r; 6b0r; 5kl5; 6b0p; 2jpa; 2jp9; 6wlh; 2prt; 4r2d; 1g2d; 1g2f; 4x9j; 4r2a; 4r2c; 1p47; 1aay; 1jk1; 1a1h; 1a1i; 1a1l; 1zaa; 1jk2; 1a1k; 1a1g; 1a1j; 1a1f; 1llm; 1va3; 1sp1
					dna (5'-d(p*ap*ap*cp*ap*cp*tp*cp*cp*cp*ap*cp*gp*c)-3')	polydeoxyribonucleotide		6.80285	1	6b0q	1	40	5kl6; 4r2s; 5kl3; 6b0o; 6b0q; 5kl2; 5kl4; 4r2e; 4r2p; 4r2q; 5kl7; 4r2r; 6b0r; 5kl5; 6b0p; 2jpa; 2jp9; 6wlh; 2prt; 4r2d; 1g2d; 1g2f; 4x9j; 4r2a; 4r2c; 1p47; 1aay; 1jk1; 1a1h; 1a1i; 1a1l; 1zaa; 1jk2; 1a1k; 1a1g; 1a1j; 1a1f; 1llm; 1va3; 1sp1	40	5kl6; 4r2s; 5kl3; 6b0o; 6b0q; 5kl2; 5kl4; 4r2e; 4r2p; 4r2q; 5kl7; 4r2r; 6b0r; 5kl5; 6b0p; 2jpa; 2jp9; 6wlh; 2prt; 4r2d; 1g2d; 1g2f; 4x9j; 4r2a; 4r2c; 1p47; 1aay; 1jk1; 1a1h; 1a1i; 1a1l; 1zaa; 1jk2; 1a1k; 1a1g; 1a1j; 1a1f; 1llm; 1va3; 1sp1
					dna (5'-d(p*tp*ap*ap*cp*cp*cp*tp*cp*cp*cp*ap*cp*gp*c)-3')	polydeoxyribonucleotide		7.00398	1	6b0r	1	40	5kl6; 4r2s; 5kl3; 6b0o; 6b0q; 5kl2; 5kl4; 4r2e; 4r2p; 4r2q; 5kl7; 4r2r; 6b0r; 5kl5; 6b0p; 2jpa; 2jp9; 6wlh; 2prt; 4r2d; 1g2d; 1g2f; 4x9j; 4r2a; 4r2c; 1p47; 1aay; 1jk1; 1a1h; 1a1i; 1a1l; 1zaa; 1jk2; 1a1k; 1a1g; 1a1j; 1a1f; 1llm; 1va3; 1sp1	40	5kl6; 4r2s; 5kl3; 6b0o; 6b0q; 5kl2; 5kl4; 4r2e; 4r2p; 4r2q; 5kl7; 4r2r; 6b0r; 5kl5; 6b0p; 2jpa; 2jp9; 6wlh; 2prt; 4r2d; 1g2d; 1g2f; 4x9j; 4r2a; 4r2c; 1p47; 1aay; 1jk1; 1a1h; 1a1i; 1a1l; 1zaa; 1jk2; 1a1k; 1a1g; 1a1j; 1a1f; 1llm; 1va3; 1sp1
					rna (29-mer)	polyribonucleotide		5.02293	1	6wlh	1	40	5kl6; 4r2s; 5kl3; 6b0o; 6b0q; 5kl2; 5kl4; 4r2e; 4r2p; 4r2q; 5kl7; 4r2r; 6b0r; 5kl5; 6b0p; 2jpa; 2jp9; 6wlh; 2prt; 4r2d; 1g2d; 1g2f; 4x9j; 4r2a; 4r2c; 1p47; 1aay; 1jk1; 1a1h; 1a1i; 1a1l; 1zaa; 1jk2; 1a1k; 1a1g; 1a1j; 1a1f; 1llm; 1va3; 1sp1	40	5kl6; 4r2s; 5kl3; 6b0o; 6b0q; 5kl2; 5kl4; 4r2e; 4r2p; 4r2q; 5kl7; 4r2r; 6b0r; 5kl5; 6b0p; 2jpa; 2jp9; 6wlh; 2prt; 4r2d; 1g2d; 1g2f; 4x9j; 4r2a; 4r2c; 1p47; 1aay; 1jk1; 1a1h; 1a1i; 1a1l; 1zaa; 1jk2; 1a1k; 1a1g; 1a1j; 1a1f; 1llm; 1va3; 1sp1
					dna (5'-d(*tp*ap*(5cm)p*gp*cp*cp*cp*ap*(5cm)p*gp*c)-3')	polydeoxyribonucleotide		6.22028	1	4x9j	1	40	5kl6; 4r2s; 5kl3; 6b0o; 6b0q; 5kl2; 5kl4; 4r2e; 4r2p; 4r2q; 5kl7; 4r2r; 6b0r; 5kl5; 6b0p; 2jpa; 2jp9; 6wlh; 2prt; 4r2d; 1g2d; 1g2f; 4x9j; 4r2a; 4r2c; 1p47; 1aay; 1jk1; 1a1h; 1a1i; 1a1l; 1zaa; 1jk2; 1a1k; 1a1g; 1a1j; 1a1f; 1llm; 1va3; 1sp1	40	5kl6; 4r2s; 5kl3; 6b0o; 6b0q; 5kl2; 5kl4; 4r2e; 4r2p; 4r2q; 5kl7; 4r2r; 6b0r; 5kl5; 6b0p; 2jpa; 2jp9; 6wlh; 2prt; 4r2d; 1g2d; 1g2f; 4x9j; 4r2a; 4r2c; 1p47; 1aay; 1jk1; 1a1h; 1a1i; 1a1l; 1zaa; 1jk2; 1a1k; 1a1g; 1a1j; 1a1f; 1llm; 1va3; 1sp1
					dna (5'-d(*tp*ap*cp*cp*cp*cp*cp*ap*cp*gp*c)-3')	polydeoxyribonucleotide		6.21695	1	5kl6	1	40	5kl6; 4r2s; 5kl3; 6b0o; 6b0q; 5kl2; 5kl4; 4r2e; 4r2p; 4r2q; 5kl7; 4r2r; 6b0r; 5kl5; 6b0p; 2jpa; 2jp9; 6wlh; 2prt; 4r2d; 1g2d; 1g2f; 4x9j; 4r2a; 4r2c; 1p47; 1aay; 1jk1; 1a1h; 1a1i; 1a1l; 1zaa; 1jk2; 1a1k; 1a1g; 1a1j; 1a1f; 1llm; 1va3; 1sp1	40	5kl6; 4r2s; 5kl3; 6b0o; 6b0q; 5kl2; 5kl4; 4r2e; 4r2p; 4r2q; 5kl7; 4r2r; 6b0r; 5kl5; 6b0p; 2jpa; 2jp9; 6wlh; 2prt; 4r2d; 1g2d; 1g2f; 4x9j; 4r2a; 4r2c; 1p47; 1aay; 1jk1; 1a1h; 1a1i; 1a1l; 1zaa; 1jk2; 1a1k; 1a1g; 1a1j; 1a1f; 1llm; 1va3; 1sp1
					dna (5'-d(p*dcp*dap*dgp*dap*dcp*dgp*dcp*dcp*dcp*dcp*dcp*dgp*dcp*dg)-3')	polydeoxyribonucleotide		5.43981	1	2jpa	1	40	5kl6; 4r2s; 5kl3; 6b0o; 6b0q; 5kl2; 5kl4; 4r2e; 4r2p; 4r2q; 5kl7; 4r2r; 6b0r; 5kl5; 6b0p; 2jpa; 2jp9; 6wlh; 2prt; 4r2d; 1g2d; 1g2f; 4x9j; 4r2a; 4r2c; 1p47; 1aay; 1jk1; 1a1h; 1a1i; 1a1l; 1zaa; 1jk2; 1a1k; 1a1g; 1a1j; 1a1f; 1llm; 1va3; 1sp1	40	5kl6; 4r2s; 5kl3; 6b0o; 6b0q; 5kl2; 5kl4; 4r2e; 4r2p; 4r2q; 5kl7; 4r2r; 6b0r; 5kl5; 6b0p; 2jpa; 2jp9; 6wlh; 2prt; 4r2d; 1g2d; 1g2f; 4x9j; 4r2a; 4r2c; 1p47; 1aay; 1jk1; 1a1h; 1a1i; 1a1l; 1zaa; 1jk2; 1a1k; 1a1g; 1a1j; 1a1f; 1llm; 1va3; 1sp1
					dna (5'-d(p*dgp*dcp*dgp*dcp*dap*dgp*dap*dcp*dgp*dcp*dcp*dcp*dcp*dcp*dgp*dcp*dg)-3')	polydeoxyribonucleotide		5.59127	1	2jp9	1	40	5kl6; 4r2s; 5kl3; 6b0o; 6b0q; 5kl2; 5kl4; 4r2e; 4r2p; 4r2q; 5kl7; 4r2r; 6b0r; 5kl5; 6b0p; 2jpa; 2jp9; 6wlh; 2prt; 4r2d; 1g2d; 1g2f; 4x9j; 4r2a; 4r2c; 1p47; 1aay; 1jk1; 1a1h; 1a1i; 1a1l; 1zaa; 1jk2; 1a1k; 1a1g; 1a1j; 1a1f; 1llm; 1va3; 1sp1	40	5kl6; 4r2s; 5kl3; 6b0o; 6b0q; 5kl2; 5kl4; 4r2e; 4r2p; 4r2q; 5kl7; 4r2r; 6b0r; 5kl5; 6b0p; 2jpa; 2jp9; 6wlh; 2prt; 4r2d; 1g2d; 1g2f; 4x9j; 4r2a; 4r2c; 1p47; 1aay; 1jk1; 1a1h; 1a1i; 1a1l; 1zaa; 1jk2; 1a1k; 1a1g; 1a1j; 1a1f; 1llm; 1va3; 1sp1
					dna (5'-d(p*gp*cp*gp*tp*gp*gp*gp*ap*gp*tp*gp*tp*t)-3')	polydeoxyribonucleotide		2.95634	1	6b0q	1	40	5kl6; 4r2s; 5kl3; 6b0o; 6b0q; 5kl2; 5kl4; 4r2e; 4r2p; 4r2q; 5kl7; 4r2r; 6b0r; 5kl5; 6b0p; 2jpa; 2jp9; 6wlh; 2prt; 4r2d; 1g2d; 1g2f; 4x9j; 4r2a; 4r2c; 1p47; 1aay; 1jk1; 1a1h; 1a1i; 1a1l; 1zaa; 1jk2; 1a1k; 1a1g; 1a1j; 1a1f; 1llm; 1va3; 1sp1	40	5kl6; 4r2s; 5kl3; 6b0o; 6b0q; 5kl2; 5kl4; 4r2e; 4r2p; 4r2q; 5kl7; 4r2r; 6b0r; 5kl5; 6b0p; 2jpa; 2jp9; 6wlh; 2prt; 4r2d; 1g2d; 1g2f; 4x9j; 4r2a; 4r2c; 1p47; 1aay; 1jk1; 1a1h; 1a1i; 1a1l; 1zaa; 1jk2; 1a1k; 1a1g; 1a1j; 1a1f; 1llm; 1va3; 1sp1
					5'-d(*tp*cp*ap*gp*cp*cp*cp*ap*cp*gp*c)-3'	polydeoxyribonucleotide		6.97476	1	1jk2	1	40	5kl6; 4r2s; 5kl3; 6b0o; 6b0q; 5kl2; 5kl4; 4r2e; 4r2p; 4r2q; 5kl7; 4r2r; 6b0r; 5kl5; 6b0p; 2jpa; 2jp9; 6wlh; 2prt; 4r2d; 1g2d; 1g2f; 4x9j; 4r2a; 4r2c; 1p47; 1aay; 1jk1; 1a1h; 1a1i; 1a1l; 1zaa; 1jk2; 1a1k; 1a1g; 1a1j; 1a1f; 1llm; 1va3; 1sp1	40	5kl6; 4r2s; 5kl3; 6b0o; 6b0q; 5kl2; 5kl4; 4r2e; 4r2p; 4r2q; 5kl7; 4r2r; 6b0r; 5kl5; 6b0p; 2jpa; 2jp9; 6wlh; 2prt; 4r2d; 1g2d; 1g2f; 4x9j; 4r2a; 4r2c; 1p47; 1aay; 1jk1; 1a1h; 1a1i; 1a1l; 1zaa; 1jk2; 1a1k; 1a1g; 1a1j; 1a1f; 1llm; 1va3; 1sp1
					5'-d(*tp*cp*cp*gp*cp*cp*cp*ap*cp*gp*c)-3'	polydeoxyribonucleotide		6.93509	1	1jk1	1	40	5kl6; 4r2s; 5kl3; 6b0o; 6b0q; 5kl2; 5kl4; 4r2e; 4r2p; 4r2q; 5kl7; 4r2r; 6b0r; 5kl5; 6b0p; 2jpa; 2jp9; 6wlh; 2prt; 4r2d; 1g2d; 1g2f; 4x9j; 4r2a; 4r2c; 1p47; 1aay; 1jk1; 1a1h; 1a1i; 1a1l; 1zaa; 1jk2; 1a1k; 1a1g; 1a1j; 1a1f; 1llm; 1va3; 1sp1	40	5kl6; 4r2s; 5kl3; 6b0o; 6b0q; 5kl2; 5kl4; 4r2e; 4r2p; 4r2q; 5kl7; 4r2r; 6b0r; 5kl5; 6b0p; 2jpa; 2jp9; 6wlh; 2prt; 4r2d; 1g2d; 1g2f; 4x9j; 4r2a; 4r2c; 1p47; 1aay; 1jk1; 1a1h; 1a1i; 1a1l; 1zaa; 1jk2; 1a1k; 1a1g; 1a1j; 1a1f; 1llm; 1va3; 1sp1
					dna (5'-d(*ap*gp*cp*gp*tp*gp*gp*gp*gp*gp*t)-3')	polydeoxyribonucleotide		2.73977	1	5kl6	1	40	5kl6; 4r2s; 5kl3; 6b0o; 6b0q; 5kl2; 5kl4; 4r2e; 4r2p; 4r2q; 5kl7; 4r2r; 6b0r; 5kl5; 6b0p; 2jpa; 2jp9; 6wlh; 2prt; 4r2d; 1g2d; 1g2f; 4x9j; 4r2a; 4r2c; 1p47; 1aay; 1jk1; 1a1h; 1a1i; 1a1l; 1zaa; 1jk2; 1a1k; 1a1g; 1a1j; 1a1f; 1llm; 1va3; 1sp1	40	5kl6; 4r2s; 5kl3; 6b0o; 6b0q; 5kl2; 5kl4; 4r2e; 4r2p; 4r2q; 5kl7; 4r2r; 6b0r; 5kl5; 6b0p; 2jpa; 2jp9; 6wlh; 2prt; 4r2d; 1g2d; 1g2f; 4x9j; 4r2a; 4r2c; 1p47; 1aay; 1jk1; 1a1h; 1a1i; 1a1l; 1zaa; 1jk2; 1a1k; 1a1g; 1a1j; 1a1f; 1llm; 1va3; 1sp1
					dna (5'-d(*cp*ap*gp*ap*cp*gp*cp*cp*cp*cp*cp*gp*cp*g)-3')	polydeoxyribonucleotide		6.8954	1	2prt	1	40	5kl6; 4r2s; 5kl3; 6b0o; 6b0q; 5kl2; 5kl4; 4r2e; 4r2p; 4r2q; 5kl7; 4r2r; 6b0r; 5kl5; 6b0p; 2jpa; 2jp9; 6wlh; 2prt; 4r2d; 1g2d; 1g2f; 4x9j; 4r2a; 4r2c; 1p47; 1aay; 1jk1; 1a1h; 1a1i; 1a1l; 1zaa; 1jk2; 1a1k; 1a1g; 1a1j; 1a1f; 1llm; 1va3; 1sp1	40	5kl6; 4r2s; 5kl3; 6b0o; 6b0q; 5kl2; 5kl4; 4r2e; 4r2p; 4r2q; 5kl7; 4r2r; 6b0r; 5kl5; 6b0p; 2jpa; 2jp9; 6wlh; 2prt; 4r2d; 1g2d; 1g2f; 4x9j; 4r2a; 4r2c; 1p47; 1aay; 1jk1; 1a1h; 1a1i; 1a1l; 1zaa; 1jk2; 1a1k; 1a1g; 1a1j; 1a1f; 1llm; 1va3; 1sp1
					dna (5'-d(p*dcp*dgp*dcp*dgp*dgp*dgp*dgp*dgp*dcp*dgp*dtp*dcp*dtp*dg)-3')	polydeoxyribonucleotide		2.4463	1	2jpa	1	40	5kl6; 4r2s; 5kl3; 6b0o; 6b0q; 5kl2; 5kl4; 4r2e; 4r2p; 4r2q; 5kl7; 4r2r; 6b0r; 5kl5; 6b0p; 2jpa; 2jp9; 6wlh; 2prt; 4r2d; 1g2d; 1g2f; 4x9j; 4r2a; 4r2c; 1p47; 1aay; 1jk1; 1a1h; 1a1i; 1a1l; 1zaa; 1jk2; 1a1k; 1a1g; 1a1j; 1a1f; 1llm; 1va3; 1sp1	40	5kl6; 4r2s; 5kl3; 6b0o; 6b0q; 5kl2; 5kl4; 4r2e; 4r2p; 4r2q; 5kl7; 4r2r; 6b0r; 5kl5; 6b0p; 2jpa; 2jp9; 6wlh; 2prt; 4r2d; 1g2d; 1g2f; 4x9j; 4r2a; 4r2c; 1p47; 1aay; 1jk1; 1a1h; 1a1i; 1a1l; 1zaa; 1jk2; 1a1k; 1a1g; 1a1j; 1a1f; 1llm; 1va3; 1sp1
					dna (5'-d(p*dcp*dgp*dcp*dgp*dgp*dgp*dgp*dgp*dcp*dgp*dtp*dcp*dtp*dgp*dcp*dgp*dc)-3')	polydeoxyribonucleotide		2.64675	1	2jp9	1	40	5kl6; 4r2s; 5kl3; 6b0o; 6b0q; 5kl2; 5kl4; 4r2e; 4r2p; 4r2q; 5kl7; 4r2r; 6b0r; 5kl5; 6b0p; 2jpa; 2jp9; 6wlh; 2prt; 4r2d; 1g2d; 1g2f; 4x9j; 4r2a; 4r2c; 1p47; 1aay; 1jk1; 1a1h; 1a1i; 1a1l; 1zaa; 1jk2; 1a1k; 1a1g; 1a1j; 1a1f; 1llm; 1va3; 1sp1	40	5kl6; 4r2s; 5kl3; 6b0o; 6b0q; 5kl2; 5kl4; 4r2e; 4r2p; 4r2q; 5kl7; 4r2r; 6b0r; 5kl5; 6b0p; 2jpa; 2jp9; 6wlh; 2prt; 4r2d; 1g2d; 1g2f; 4x9j; 4r2a; 4r2c; 1p47; 1aay; 1jk1; 1a1h; 1a1i; 1a1l; 1zaa; 1jk2; 1a1k; 1a1g; 1a1j; 1a1f; 1llm; 1va3; 1sp1
					dna (5'-d(p*gp*cp*gp*tp*gp*gp*gp*ap*gp*gp*gp*t)-3')	polydeoxyribonucleotide		3.29339	1	6b0p	1	40	5kl6; 4r2s; 5kl3; 6b0o; 6b0q; 5kl2; 5kl4; 4r2e; 4r2p; 4r2q; 5kl7; 4r2r; 6b0r; 5kl5; 6b0p; 2jpa; 2jp9; 6wlh; 2prt; 4r2d; 1g2d; 1g2f; 4x9j; 4r2a; 4r2c; 1p47; 1aay; 1jk1; 1a1h; 1a1i; 1a1l; 1zaa; 1jk2; 1a1k; 1a1g; 1a1j; 1a1f; 1llm; 1va3; 1sp1	40	5kl6; 4r2s; 5kl3; 6b0o; 6b0q; 5kl2; 5kl4; 4r2e; 4r2p; 4r2q; 5kl7; 4r2r; 6b0r; 5kl5; 6b0p; 2jpa; 2jp9; 6wlh; 2prt; 4r2d; 1g2d; 1g2f; 4x9j; 4r2a; 4r2c; 1p47; 1aay; 1jk1; 1a1h; 1a1i; 1a1l; 1zaa; 1jk2; 1a1k; 1a1g; 1a1j; 1a1f; 1llm; 1va3; 1sp1
					5'-d(*ap*gp*cp*gp*tp*gp*gp*gp*cp*gp*g)-3'	polydeoxyribonucleotide		4.04847	1	1jk1	1	40	5kl6; 4r2s; 5kl3; 6b0o; 6b0q; 5kl2; 5kl4; 4r2e; 4r2p; 4r2q; 5kl7; 4r2r; 6b0r; 5kl5; 6b0p; 2jpa; 2jp9; 6wlh; 2prt; 4r2d; 1g2d; 1g2f; 4x9j; 4r2a; 4r2c; 1p47; 1aay; 1jk1; 1a1h; 1a1i; 1a1l; 1zaa; 1jk2; 1a1k; 1a1g; 1a1j; 1a1f; 1llm; 1va3; 1sp1	40	5kl6; 4r2s; 5kl3; 6b0o; 6b0q; 5kl2; 5kl4; 4r2e; 4r2p; 4r2q; 5kl7; 4r2r; 6b0r; 5kl5; 6b0p; 2jpa; 2jp9; 6wlh; 2prt; 4r2d; 1g2d; 1g2f; 4x9j; 4r2a; 4r2c; 1p47; 1aay; 1jk1; 1a1h; 1a1i; 1a1l; 1zaa; 1jk2; 1a1k; 1a1g; 1a1j; 1a1f; 1llm; 1va3; 1sp1
					5'-d(*ap*gp*cp*gp*tp*gp*gp*gp*cp*tp*g)-3'	polydeoxyribonucleotide		4.15748	1	1jk2	1	40	5kl6; 4r2s; 5kl3; 6b0o; 6b0q; 5kl2; 5kl4; 4r2e; 4r2p; 4r2q; 5kl7; 4r2r; 6b0r; 5kl5; 6b0p; 2jpa; 2jp9; 6wlh; 2prt; 4r2d; 1g2d; 1g2f; 4x9j; 4r2a; 4r2c; 1p47; 1aay; 1jk1; 1a1h; 1a1i; 1a1l; 1zaa; 1jk2; 1a1k; 1a1g; 1a1j; 1a1f; 1llm; 1va3; 1sp1	40	5kl6; 4r2s; 5kl3; 6b0o; 6b0q; 5kl2; 5kl4; 4r2e; 4r2p; 4r2q; 5kl7; 4r2r; 6b0r; 5kl5; 6b0p; 2jpa; 2jp9; 6wlh; 2prt; 4r2d; 1g2d; 1g2f; 4x9j; 4r2a; 4r2c; 1p47; 1aay; 1jk1; 1a1h; 1a1i; 1a1l; 1zaa; 1jk2; 1a1k; 1a1g; 1a1j; 1a1f; 1llm; 1va3; 1sp1
					dna (5'-d(*ap*gp*(5cm)p*gp*tp*gp*gp*gp*(5cm)p*gp*t)-3')	polydeoxyribonucleotide		3.57563	1	4x9j	1	40	5kl6; 4r2s; 5kl3; 6b0o; 6b0q; 5kl2; 5kl4; 4r2e; 4r2p; 4r2q; 5kl7; 4r2r; 6b0r; 5kl5; 6b0p; 2jpa; 2jp9; 6wlh; 2prt; 4r2d; 1g2d; 1g2f; 4x9j; 4r2a; 4r2c; 1p47; 1aay; 1jk1; 1a1h; 1a1i; 1a1l; 1zaa; 1jk2; 1a1k; 1a1g; 1a1j; 1a1f; 1llm; 1va3; 1sp1	40	5kl6; 4r2s; 5kl3; 6b0o; 6b0q; 5kl2; 5kl4; 4r2e; 4r2p; 4r2q; 5kl7; 4r2r; 6b0r; 5kl5; 6b0p; 2jpa; 2jp9; 6wlh; 2prt; 4r2d; 1g2d; 1g2f; 4x9j; 4r2a; 4r2c; 1p47; 1aay; 1jk1; 1a1h; 1a1i; 1a1l; 1zaa; 1jk2; 1a1k; 1a1g; 1a1j; 1a1f; 1llm; 1va3; 1sp1
					dna (5'-d(*cp*gp*cp*gp*gp*gp*gp*gp*cp*gp*tp*cp*tp*g)-3')	polydeoxyribonucleotide		3.22076	1	2prt	1	40	5kl6; 4r2s; 5kl3; 6b0o; 6b0q; 5kl2; 5kl4; 4r2e; 4r2p; 4r2q; 5kl7; 4r2r; 6b0r; 5kl5; 6b0p; 2jpa; 2jp9; 6wlh; 2prt; 4r2d; 1g2d; 1g2f; 4x9j; 4r2a; 4r2c; 1p47; 1aay; 1jk1; 1a1h; 1a1i; 1a1l; 1zaa; 1jk2; 1a1k; 1a1g; 1a1j; 1a1f; 1llm; 1va3; 1sp1	40	5kl6; 4r2s; 5kl3; 6b0o; 6b0q; 5kl2; 5kl4; 4r2e; 4r2p; 4r2q; 5kl7; 4r2r; 6b0r; 5kl5; 6b0p; 2jpa; 2jp9; 6wlh; 2prt; 4r2d; 1g2d; 1g2f; 4x9j; 4r2a; 4r2c; 1p47; 1aay; 1jk1; 1a1h; 1a1i; 1a1l; 1zaa; 1jk2; 1a1k; 1a1g; 1a1j; 1a1f; 1llm; 1va3; 1sp1
			E291K	-5.587	dna (5'-d(*tp*ap*(5cm)p*gp*cp*cp*cp*ap*cp*gp*c)-3')	polydeoxyribonucleotide		3.45175	7	4r2s; 5kl4; 4r2e; 5kl7; 4r2r; 5kl5; 4r2a	1	40	5kl6; 4r2s; 5kl3; 6b0o; 6b0q; 5kl2; 5kl4; 4r2e; 4r2p; 4r2q; 5kl7; 4r2r; 6b0r; 5kl5; 6b0p; 2jpa; 2jp9; 6wlh; 2prt; 6blw; 4r2d; 1g2d; 1g2f; 4x9j; 4r2a; 4r2c; 1p47; 1aay; 1jk1; 1a1h; 1a1i; 1a1l; 1zaa; 1jk2; 1a1k; 1a1g; 1a1j; 1a1f; 1f2i; 1va1	40	5kl6; 4r2s; 5kl3; 6b0o; 6b0q; 5kl2; 5kl4; 4r2e; 4r2p; 4r2q; 5kl7; 4r2r; 6b0r; 5kl5; 6b0p; 2jpa; 2jp9; 6wlh; 2prt; 6blw; 4r2d; 1g2d; 1g2f; 4x9j; 4r2a; 4r2c; 1p47; 1aay; 1jk1; 1a1h; 1a1i; 1a1l; 1zaa; 1jk2; 1a1k; 1a1g; 1a1j; 1a1f; 1f2i; 1va1
					dna (5'-d(*ap*gp*cp*gp*tp*gp*gp*gp*cp*gp*t)-3')	polydeoxyribonucleotide		3.18349	4	1aay; 1zaa; 1a1g; 1a1j	2	40	5kl6; 4r2s; 5kl3; 6b0o; 6b0q; 5kl2; 5kl4; 4r2e; 4r2p; 4r2q; 5kl7; 4r2r; 6b0r; 5kl5; 6b0p; 2jpa; 2jp9; 6wlh; 2prt; 6blw; 4r2d; 1g2d; 1g2f; 4x9j; 4r2a; 4r2c; 1p47; 1aay; 1jk1; 1a1h; 1a1i; 1a1l; 1zaa; 1jk2; 1a1k; 1a1g; 1a1j; 1a1f; 1f2i; 1va1	40	5kl6; 4r2s; 5kl3; 6b0o; 6b0q; 5kl2; 5kl4; 4r2e; 4r2p; 4r2q; 5kl7; 4r2r; 6b0r; 5kl5; 6b0p; 2jpa; 2jp9; 6wlh; 2prt; 6blw; 4r2d; 1g2d; 1g2f; 4x9j; 4r2a; 4r2c; 1p47; 1aay; 1jk1; 1a1h; 1a1i; 1a1l; 1zaa; 1jk2; 1a1k; 1a1g; 1a1j; 1a1f; 1f2i; 1va1
					dna (5'-d(*tp*ap*cp*gp*cp*cp*cp*ap*cp*gp*c)-3')	polydeoxyribonucleotide		5.43471	4	1aay; 1zaa; 1a1g; 1a1j	2	40	5kl6; 4r2s; 5kl3; 6b0o; 6b0q; 5kl2; 5kl4; 4r2e; 4r2p; 4r2q; 5kl7; 4r2r; 6b0r; 5kl5; 6b0p; 2jpa; 2jp9; 6wlh; 2prt; 6blw; 4r2d; 1g2d; 1g2f; 4x9j; 4r2a; 4r2c; 1p47; 1aay; 1jk1; 1a1h; 1a1i; 1a1l; 1zaa; 1jk2; 1a1k; 1a1g; 1a1j; 1a1f; 1f2i; 1va1	40	5kl6; 4r2s; 5kl3; 6b0o; 6b0q; 5kl2; 5kl4; 4r2e; 4r2p; 4r2q; 5kl7; 4r2r; 6b0r; 5kl5; 6b0p; 2jpa; 2jp9; 6wlh; 2prt; 6blw; 4r2d; 1g2d; 1g2f; 4x9j; 4r2a; 4r2c; 1p47; 1aay; 1jk1; 1a1h; 1a1i; 1a1l; 1zaa; 1jk2; 1a1k; 1a1g; 1a1j; 1a1f; 1f2i; 1va1
					dna (5'-d(*ap*gp*cp*gp*tp*gp*gp*gp*(5fc)p*gp*t)-3')	polydeoxyribonucleotide		2.72884	3	5kl4; 4r2q; 4r2d	1	40	5kl6; 4r2s; 5kl3; 6b0o; 6b0q; 5kl2; 5kl4; 4r2e; 4r2p; 4r2q; 5kl7; 4r2r; 6b0r; 5kl5; 6b0p; 2jpa; 2jp9; 6wlh; 2prt; 6blw; 4r2d; 1g2d; 1g2f; 4x9j; 4r2a; 4r2c; 1p47; 1aay; 1jk1; 1a1h; 1a1i; 1a1l; 1zaa; 1jk2; 1a1k; 1a1g; 1a1j; 1a1f; 1f2i; 1va1	40	5kl6; 4r2s; 5kl3; 6b0o; 6b0q; 5kl2; 5kl4; 4r2e; 4r2p; 4r2q; 5kl7; 4r2r; 6b0r; 5kl5; 6b0p; 2jpa; 2jp9; 6wlh; 2prt; 6blw; 4r2d; 1g2d; 1g2f; 4x9j; 4r2a; 4r2c; 1p47; 1aay; 1jk1; 1a1h; 1a1i; 1a1l; 1zaa; 1jk2; 1a1k; 1a1g; 1a1j; 1a1f; 1f2i; 1va1
					dna (5'-d(*ap*gp*cp*gp*tp*gp*gp*gp*(1cc)p*gp*t)-3')	polydeoxyribonucleotide		2.43931	3	5kl7; 4r2r; 5kl5	0	40	5kl6; 4r2s; 5kl3; 6b0o; 6b0q; 5kl2; 5kl4; 4r2e; 4r2p; 4r2q; 5kl7; 4r2r; 6b0r; 5kl5; 6b0p; 2jpa; 2jp9; 6wlh; 2prt; 6blw; 4r2d; 1g2d; 1g2f; 4x9j; 4r2a; 4r2c; 1p47; 1aay; 1jk1; 1a1h; 1a1i; 1a1l; 1zaa; 1jk2; 1a1k; 1a1g; 1a1j; 1a1f; 1f2i; 1va1	40	5kl6; 4r2s; 5kl3; 6b0o; 6b0q; 5kl2; 5kl4; 4r2e; 4r2p; 4r2q; 5kl7; 4r2r; 6b0r; 5kl5; 6b0p; 2jpa; 2jp9; 6wlh; 2prt; 6blw; 4r2d; 1g2d; 1g2f; 4x9j; 4r2a; 4r2c; 1p47; 1aay; 1jk1; 1a1h; 1a1i; 1a1l; 1zaa; 1jk2; 1a1k; 1a1g; 1a1j; 1a1f; 1f2i; 1va1
					dna (5'-d(*ap*gp*cp*gp*tp*gp*gp*gp*(5cm)p*gp*t)-3')	polydeoxyribonucleotide		3.28728	3	4r2s; 4r2e; 4r2a	1	40	5kl6; 4r2s; 5kl3; 6b0o; 6b0q; 5kl2; 5kl4; 4r2e; 4r2p; 4r2q; 5kl7; 4r2r; 6b0r; 5kl5; 6b0p; 2jpa; 2jp9; 6wlh; 2prt; 6blw; 4r2d; 1g2d; 1g2f; 4x9j; 4r2a; 4r2c; 1p47; 1aay; 1jk1; 1a1h; 1a1i; 1a1l; 1zaa; 1jk2; 1a1k; 1a1g; 1a1j; 1a1f; 1f2i; 1va1	40	5kl6; 4r2s; 5kl3; 6b0o; 6b0q; 5kl2; 5kl4; 4r2e; 4r2p; 4r2q; 5kl7; 4r2r; 6b0r; 5kl5; 6b0p; 2jpa; 2jp9; 6wlh; 2prt; 6blw; 4r2d; 1g2d; 1g2f; 4x9j; 4r2a; 4r2c; 1p47; 1aay; 1jk1; 1a1h; 1a1i; 1a1l; 1zaa; 1jk2; 1a1k; 1a1g; 1a1j; 1a1f; 1f2i; 1va1
					dna (5'-d(*ap*gp*cp*gp*tp*gp*gp*gp*cp*ap*c)-3')	polydeoxyribonucleotide		3.39116	3	1a1h; 1a1i; 1a1l	1	40	5kl6; 4r2s; 5kl3; 6b0o; 6b0q; 5kl2; 5kl4; 4r2e; 4r2p; 4r2q; 5kl7; 4r2r; 6b0r; 5kl5; 6b0p; 2jpa; 2jp9; 6wlh; 2prt; 6blw; 4r2d; 1g2d; 1g2f; 4x9j; 4r2a; 4r2c; 1p47; 1aay; 1jk1; 1a1h; 1a1i; 1a1l; 1zaa; 1jk2; 1a1k; 1a1g; 1a1j; 1a1f; 1f2i; 1va1	40	5kl6; 4r2s; 5kl3; 6b0o; 6b0q; 5kl2; 5kl4; 4r2e; 4r2p; 4r2q; 5kl7; 4r2r; 6b0r; 5kl5; 6b0p; 2jpa; 2jp9; 6wlh; 2prt; 6blw; 4r2d; 1g2d; 1g2f; 4x9j; 4r2a; 4r2c; 1p47; 1aay; 1jk1; 1a1h; 1a1i; 1a1l; 1zaa; 1jk2; 1a1k; 1a1g; 1a1j; 1a1f; 1f2i; 1va1
					5'-d(*gp*ap*cp*gp*cp*tp*ap*tp*ap*ap*ap*ap*gp*gp*ap*g)-3'	polydeoxyribonucleotide		2.81661	2	1g2d; 1g2f	0	40	5kl6; 4r2s; 5kl3; 6b0o; 6b0q; 5kl2; 5kl4; 4r2e; 4r2p; 4r2q; 5kl7; 4r2r; 6b0r; 5kl5; 6b0p; 2jpa; 2jp9; 6wlh; 2prt; 6blw; 4r2d; 1g2d; 1g2f; 4x9j; 4r2a; 4r2c; 1p47; 1aay; 1jk1; 1a1h; 1a1i; 1a1l; 1zaa; 1jk2; 1a1k; 1a1g; 1a1j; 1a1f; 1f2i; 1va1	40	5kl6; 4r2s; 5kl3; 6b0o; 6b0q; 5kl2; 5kl4; 4r2e; 4r2p; 4r2q; 5kl7; 4r2r; 6b0r; 5kl5; 6b0p; 2jpa; 2jp9; 6wlh; 2prt; 6blw; 4r2d; 1g2d; 1g2f; 4x9j; 4r2a; 4r2c; 1p47; 1aay; 1jk1; 1a1h; 1a1i; 1a1l; 1zaa; 1jk2; 1a1k; 1a1g; 1a1j; 1a1f; 1f2i; 1va1
					5'-d(*tp*cp*cp*tp*tp*tp*tp*ap*tp*ap*gp*cp*gp*tp*cp*c)-3'	polydeoxyribonucleotide		5.07784	2	1g2d; 1g2f	0	40	5kl6; 4r2s; 5kl3; 6b0o; 6b0q; 5kl2; 5kl4; 4r2e; 4r2p; 4r2q; 5kl7; 4r2r; 6b0r; 5kl5; 6b0p; 2jpa; 2jp9; 6wlh; 2prt; 6blw; 4r2d; 1g2d; 1g2f; 4x9j; 4r2a; 4r2c; 1p47; 1aay; 1jk1; 1a1h; 1a1i; 1a1l; 1zaa; 1jk2; 1a1k; 1a1g; 1a1j; 1a1f; 1f2i; 1va1	40	5kl6; 4r2s; 5kl3; 6b0o; 6b0q; 5kl2; 5kl4; 4r2e; 4r2p; 4r2q; 5kl7; 4r2r; 6b0r; 5kl5; 6b0p; 2jpa; 2jp9; 6wlh; 2prt; 6blw; 4r2d; 1g2d; 1g2f; 4x9j; 4r2a; 4r2c; 1p47; 1aay; 1jk1; 1a1h; 1a1i; 1a1l; 1zaa; 1jk2; 1a1k; 1a1g; 1a1j; 1a1f; 1f2i; 1va1
					dna (5'-d(*ap*gp*cp*gp*tp*gp*gp*gp*ap*gp*t)-3')	polydeoxyribonucleotide		2.02017	2	5kl3; 5kl2	0	40	5kl6; 4r2s; 5kl3; 6b0o; 6b0q; 5kl2; 5kl4; 4r2e; 4r2p; 4r2q; 5kl7; 4r2r; 6b0r; 5kl5; 6b0p; 2jpa; 2jp9; 6wlh; 2prt; 6blw; 4r2d; 1g2d; 1g2f; 4x9j; 4r2a; 4r2c; 1p47; 1aay; 1jk1; 1a1h; 1a1i; 1a1l; 1zaa; 1jk2; 1a1k; 1a1g; 1a1j; 1a1f; 1f2i; 1va1	40	5kl6; 4r2s; 5kl3; 6b0o; 6b0q; 5kl2; 5kl4; 4r2e; 4r2p; 4r2q; 5kl7; 4r2r; 6b0r; 5kl5; 6b0p; 2jpa; 2jp9; 6wlh; 2prt; 6blw; 4r2d; 1g2d; 1g2f; 4x9j; 4r2a; 4r2c; 1p47; 1aay; 1jk1; 1a1h; 1a1i; 1a1l; 1zaa; 1jk2; 1a1k; 1a1g; 1a1j; 1a1f; 1f2i; 1va1
					dna (5'-d(*ap*gp*cp*gp*tp*gp*gp*gp*ap*cp*c)-3')	polydeoxyribonucleotide		2.9728	2	1a1k; 1a1f	0	40	5kl6; 4r2s; 5kl3; 6b0o; 6b0q; 5kl2; 5kl4; 4r2e; 4r2p; 4r2q; 5kl7; 4r2r; 6b0r; 5kl5; 6b0p; 2jpa; 2jp9; 6wlh; 2prt; 6blw; 4r2d; 1g2d; 1g2f; 4x9j; 4r2a; 4r2c; 1p47; 1aay; 1jk1; 1a1h; 1a1i; 1a1l; 1zaa; 1jk2; 1a1k; 1a1g; 1a1j; 1a1f; 1f2i; 1va1	40	5kl6; 4r2s; 5kl3; 6b0o; 6b0q; 5kl2; 5kl4; 4r2e; 4r2p; 4r2q; 5kl7; 4r2r; 6b0r; 5kl5; 6b0p; 2jpa; 2jp9; 6wlh; 2prt; 6blw; 4r2d; 1g2d; 1g2f; 4x9j; 4r2a; 4r2c; 1p47; 1aay; 1jk1; 1a1h; 1a1i; 1a1l; 1zaa; 1jk2; 1a1k; 1a1g; 1a1j; 1a1f; 1f2i; 1va1
					dna (5'-d(*ap*gp*cp*gp*tp*gp*gp*gp*(5hc)p*gp*t)-3')	polydeoxyribonucleotide		2.51015	2	4r2p; 4r2c	1	40	5kl6; 4r2s; 5kl3; 6b0o; 6b0q; 5kl2; 5kl4; 4r2e; 4r2p; 4r2q; 5kl7; 4r2r; 6b0r; 5kl5; 6b0p; 2jpa; 2jp9; 6wlh; 2prt; 6blw; 4r2d; 1g2d; 1g2f; 4x9j; 4r2a; 4r2c; 1p47; 1aay; 1jk1; 1a1h; 1a1i; 1a1l; 1zaa; 1jk2; 1a1k; 1a1g; 1a1j; 1a1f; 1f2i; 1va1	40	5kl6; 4r2s; 5kl3; 6b0o; 6b0q; 5kl2; 5kl4; 4r2e; 4r2p; 4r2q; 5kl7; 4r2r; 6b0r; 5kl5; 6b0p; 2jpa; 2jp9; 6wlh; 2prt; 6blw; 4r2d; 1g2d; 1g2f; 4x9j; 4r2a; 4r2c; 1p47; 1aay; 1jk1; 1a1h; 1a1i; 1a1l; 1zaa; 1jk2; 1a1k; 1a1g; 1a1j; 1a1f; 1f2i; 1va1
					dna (5'-d(*tp*ap*cp*tp*cp*cp*cp*ap*cp*gp*c)-3')	polydeoxyribonucleotide		5.72079	2	5kl3; 5kl2	0	40	5kl6; 4r2s; 5kl3; 6b0o; 6b0q; 5kl2; 5kl4; 4r2e; 4r2p; 4r2q; 5kl7; 4r2r; 6b0r; 5kl5; 6b0p; 2jpa; 2jp9; 6wlh; 2prt; 6blw; 4r2d; 1g2d; 1g2f; 4x9j; 4r2a; 4r2c; 1p47; 1aay; 1jk1; 1a1h; 1a1i; 1a1l; 1zaa; 1jk2; 1a1k; 1a1g; 1a1j; 1a1f; 1f2i; 1va1	40	5kl6; 4r2s; 5kl3; 6b0o; 6b0q; 5kl2; 5kl4; 4r2e; 4r2p; 4r2q; 5kl7; 4r2r; 6b0r; 5kl5; 6b0p; 2jpa; 2jp9; 6wlh; 2prt; 6blw; 4r2d; 1g2d; 1g2f; 4x9j; 4r2a; 4r2c; 1p47; 1aay; 1jk1; 1a1h; 1a1i; 1a1l; 1zaa; 1jk2; 1a1k; 1a1g; 1a1j; 1a1f; 1f2i; 1va1
					dna (5'-d(*tp*ap*(5hc)p*gp*cp*cp*cp*ap*cp*gp*c)-3')	polydeoxyribonucleotide		4.98097	2	4r2p; 4r2c	1	40	5kl6; 4r2s; 5kl3; 6b0o; 6b0q; 5kl2; 5kl4; 4r2e; 4r2p; 4r2q; 5kl7; 4r2r; 6b0r; 5kl5; 6b0p; 2jpa; 2jp9; 6wlh; 2prt; 6blw; 4r2d; 1g2d; 1g2f; 4x9j; 4r2a; 4r2c; 1p47; 1aay; 1jk1; 1a1h; 1a1i; 1a1l; 1zaa; 1jk2; 1a1k; 1a1g; 1a1j; 1a1f; 1f2i; 1va1	40	5kl6; 4r2s; 5kl3; 6b0o; 6b0q; 5kl2; 5kl4; 4r2e; 4r2p; 4r2q; 5kl7; 4r2r; 6b0r; 5kl5; 6b0p; 2jpa; 2jp9; 6wlh; 2prt; 6blw; 4r2d; 1g2d; 1g2f; 4x9j; 4r2a; 4r2c; 1p47; 1aay; 1jk1; 1a1h; 1a1i; 1a1l; 1zaa; 1jk2; 1a1k; 1a1g; 1a1j; 1a1f; 1f2i; 1va1
					dna (5'-d(*tp*gp*gp*tp*cp*cp*cp*ap*cp*gp*c)-3')	polydeoxyribonucleotide		4.5442	2	1a1k; 1a1f	0	40	5kl6; 4r2s; 5kl3; 6b0o; 6b0q; 5kl2; 5kl4; 4r2e; 4r2p; 4r2q; 5kl7; 4r2r; 6b0r; 5kl5; 6b0p; 2jpa; 2jp9; 6wlh; 2prt; 6blw; 4r2d; 1g2d; 1g2f; 4x9j; 4r2a; 4r2c; 1p47; 1aay; 1jk1; 1a1h; 1a1i; 1a1l; 1zaa; 1jk2; 1a1k; 1a1g; 1a1j; 1a1f; 1f2i; 1va1	40	5kl6; 4r2s; 5kl3; 6b0o; 6b0q; 5kl2; 5kl4; 4r2e; 4r2p; 4r2q; 5kl7; 4r2r; 6b0r; 5kl5; 6b0p; 2jpa; 2jp9; 6wlh; 2prt; 6blw; 4r2d; 1g2d; 1g2f; 4x9j; 4r2a; 4r2c; 1p47; 1aay; 1jk1; 1a1h; 1a1i; 1a1l; 1zaa; 1jk2; 1a1k; 1a1g; 1a1j; 1a1f; 1f2i; 1va1
					dna (5'-d(*tp*gp*tp*gp*cp*cp*cp*ap*cp*gp*c)-3')	polydeoxyribonucleotide		6.19348	2	1a1h; 1a1i	0	40	5kl6; 4r2s; 5kl3; 6b0o; 6b0q; 5kl2; 5kl4; 4r2e; 4r2p; 4r2q; 5kl7; 4r2r; 6b0r; 5kl5; 6b0p; 2jpa; 2jp9; 6wlh; 2prt; 6blw; 4r2d; 1g2d; 1g2f; 4x9j; 4r2a; 4r2c; 1p47; 1aay; 1jk1; 1a1h; 1a1i; 1a1l; 1zaa; 1jk2; 1a1k; 1a1g; 1a1j; 1a1f; 1f2i; 1va1	40	5kl6; 4r2s; 5kl3; 6b0o; 6b0q; 5kl2; 5kl4; 4r2e; 4r2p; 4r2q; 5kl7; 4r2r; 6b0r; 5kl5; 6b0p; 2jpa; 2jp9; 6wlh; 2prt; 6blw; 4r2d; 1g2d; 1g2f; 4x9j; 4r2a; 4r2c; 1p47; 1aay; 1jk1; 1a1h; 1a1i; 1a1l; 1zaa; 1jk2; 1a1k; 1a1g; 1a1j; 1a1f; 1f2i; 1va1
					dna (5'-d(*tp*ap*(5fc)p*gp*cp*cp*cp*ap*cp*gp*c)-3')	polydeoxyribonucleotide		7.05927	2	4r2q; 4r2d	1	40	5kl6; 4r2s; 5kl3; 6b0o; 6b0q; 5kl2; 5kl4; 4r2e; 4r2p; 4r2q; 5kl7; 4r2r; 6b0r; 5kl5; 6b0p; 2jpa; 2jp9; 6wlh; 2prt; 6blw; 4r2d; 1g2d; 1g2f; 4x9j; 4r2a; 4r2c; 1p47; 1aay; 1jk1; 1a1h; 1a1i; 1a1l; 1zaa; 1jk2; 1a1k; 1a1g; 1a1j; 1a1f; 1f2i; 1va1	40	5kl6; 4r2s; 5kl3; 6b0o; 6b0q; 5kl2; 5kl4; 4r2e; 4r2p; 4r2q; 5kl7; 4r2r; 6b0r; 5kl5; 6b0p; 2jpa; 2jp9; 6wlh; 2prt; 6blw; 4r2d; 1g2d; 1g2f; 4x9j; 4r2a; 4r2c; 1p47; 1aay; 1jk1; 1a1h; 1a1i; 1a1l; 1zaa; 1jk2; 1a1k; 1a1g; 1a1j; 1a1f; 1f2i; 1va1
					5'-d(*ap*tp*gp*gp*gp*cp*gp*cp*gp*cp*cp*cp*ap*t)-3'	polydeoxyribonucleotide		3.20352	1	1f2i	1	40	5kl6; 4r2s; 5kl3; 6b0o; 6b0q; 5kl2; 5kl4; 4r2e; 4r2p; 4r2q; 5kl7; 4r2r; 6b0r; 5kl5; 6b0p; 2jpa; 2jp9; 6wlh; 2prt; 6blw; 4r2d; 1g2d; 1g2f; 4x9j; 4r2a; 4r2c; 1p47; 1aay; 1jk1; 1a1h; 1a1i; 1a1l; 1zaa; 1jk2; 1a1k; 1a1g; 1a1j; 1a1f; 1f2i; 1va1	40	5kl6; 4r2s; 5kl3; 6b0o; 6b0q; 5kl2; 5kl4; 4r2e; 4r2p; 4r2q; 5kl7; 4r2r; 6b0r; 5kl5; 6b0p; 2jpa; 2jp9; 6wlh; 2prt; 6blw; 4r2d; 1g2d; 1g2f; 4x9j; 4r2a; 4r2c; 1p47; 1aay; 1jk1; 1a1h; 1a1i; 1a1l; 1zaa; 1jk2; 1a1k; 1a1g; 1a1j; 1a1f; 1f2i; 1va1
					dna (5'-d(p*gp*cp*gp*tp*gp*gp*gp*ap*gp*tp*gp*tp*t)-3')	polydeoxyribonucleotide		2.90521	1	6b0q	0	40	5kl6; 4r2s; 5kl3; 6b0o; 6b0q; 5kl2; 5kl4; 4r2e; 4r2p; 4r2q; 5kl7; 4r2r; 6b0r; 5kl5; 6b0p; 2jpa; 2jp9; 6wlh; 2prt; 6blw; 4r2d; 1g2d; 1g2f; 4x9j; 4r2a; 4r2c; 1p47; 1aay; 1jk1; 1a1h; 1a1i; 1a1l; 1zaa; 1jk2; 1a1k; 1a1g; 1a1j; 1a1f; 1f2i; 1va1	40	5kl6; 4r2s; 5kl3; 6b0o; 6b0q; 5kl2; 5kl4; 4r2e; 4r2p; 4r2q; 5kl7; 4r2r; 6b0r; 5kl5; 6b0p; 2jpa; 2jp9; 6wlh; 2prt; 6blw; 4r2d; 1g2d; 1g2f; 4x9j; 4r2a; 4r2c; 1p47; 1aay; 1jk1; 1a1h; 1a1i; 1a1l; 1zaa; 1jk2; 1a1k; 1a1g; 1a1j; 1a1f; 1f2i; 1va1
					dna (5'-d(*ap*gp*cp*gp*tp*gp*gp*gp*ap*gp*tp*gp*t)-3')	polydeoxyribonucleotide		2.99859	1	6b0o	0	40	5kl6; 4r2s; 5kl3; 6b0o; 6b0q; 5kl2; 5kl4; 4r2e; 4r2p; 4r2q; 5kl7; 4r2r; 6b0r; 5kl5; 6b0p; 2jpa; 2jp9; 6wlh; 2prt; 6blw; 4r2d; 1g2d; 1g2f; 4x9j; 4r2a; 4r2c; 1p47; 1aay; 1jk1; 1a1h; 1a1i; 1a1l; 1zaa; 1jk2; 1a1k; 1a1g; 1a1j; 1a1f; 1f2i; 1va1	40	5kl6; 4r2s; 5kl3; 6b0o; 6b0q; 5kl2; 5kl4; 4r2e; 4r2p; 4r2q; 5kl7; 4r2r; 6b0r; 5kl5; 6b0p; 2jpa; 2jp9; 6wlh; 2prt; 6blw; 4r2d; 1g2d; 1g2f; 4x9j; 4r2a; 4r2c; 1p47; 1aay; 1jk1; 1a1h; 1a1i; 1a1l; 1zaa; 1jk2; 1a1k; 1a1g; 1a1j; 1a1f; 1f2i; 1va1
					dna (5'-d(*ap*gp*cp*gp*tp*gp*gp*gp*ap*gp*gp*gp*tp*tp*a)-3')	polydeoxyribonucleotide		3.17218	1	6b0r	0	40	5kl6; 4r2s; 5kl3; 6b0o; 6b0q; 5kl2; 5kl4; 4r2e; 4r2p; 4r2q; 5kl7; 4r2r; 6b0r; 5kl5; 6b0p; 2jpa; 2jp9; 6wlh; 2prt; 6blw; 4r2d; 1g2d; 1g2f; 4x9j; 4r2a; 4r2c; 1p47; 1aay; 1jk1; 1a1h; 1a1i; 1a1l; 1zaa; 1jk2; 1a1k; 1a1g; 1a1j; 1a1f; 1f2i; 1va1	40	5kl6; 4r2s; 5kl3; 6b0o; 6b0q; 5kl2; 5kl4; 4r2e; 4r2p; 4r2q; 5kl7; 4r2r; 6b0r; 5kl5; 6b0p; 2jpa; 2jp9; 6wlh; 2prt; 6blw; 4r2d; 1g2d; 1g2f; 4x9j; 4r2a; 4r2c; 1p47; 1aay; 1jk1; 1a1h; 1a1i; 1a1l; 1zaa; 1jk2; 1a1k; 1a1g; 1a1j; 1a1f; 1f2i; 1va1
					dna (5'-d(p*gp*cp*gp*tp*gp*gp*gp*ap*gp*gp*gp*t)-3')	polydeoxyribonucleotide		3.2634	1	6b0p	0	40	5kl6; 4r2s; 5kl3; 6b0o; 6b0q; 5kl2; 5kl4; 4r2e; 4r2p; 4r2q; 5kl7; 4r2r; 6b0r; 5kl5; 6b0p; 2jpa; 2jp9; 6wlh; 2prt; 6blw; 4r2d; 1g2d; 1g2f; 4x9j; 4r2a; 4r2c; 1p47; 1aay; 1jk1; 1a1h; 1a1i; 1a1l; 1zaa; 1jk2; 1a1k; 1a1g; 1a1j; 1a1f; 1f2i; 1va1	40	5kl6; 4r2s; 5kl3; 6b0o; 6b0q; 5kl2; 5kl4; 4r2e; 4r2p; 4r2q; 5kl7; 4r2r; 6b0r; 5kl5; 6b0p; 2jpa; 2jp9; 6wlh; 2prt; 6blw; 4r2d; 1g2d; 1g2f; 4x9j; 4r2a; 4r2c; 1p47; 1aay; 1jk1; 1a1h; 1a1i; 1a1l; 1zaa; 1jk2; 1a1k; 1a1g; 1a1j; 1a1f; 1f2i; 1va1
					rna (29-mer)	polyribonucleotide		1.86754	1	6wlh	0	40	5kl6; 4r2s; 5kl3; 6b0o; 6b0q; 5kl2; 5kl4; 4r2e; 4r2p; 4r2q; 5kl7; 4r2r; 6b0r; 5kl5; 6b0p; 2jpa; 2jp9; 6wlh; 2prt; 6blw; 4r2d; 1g2d; 1g2f; 4x9j; 4r2a; 4r2c; 1p47; 1aay; 1jk1; 1a1h; 1a1i; 1a1l; 1zaa; 1jk2; 1a1k; 1a1g; 1a1j; 1a1f; 1f2i; 1va1	40	5kl6; 4r2s; 5kl3; 6b0o; 6b0q; 5kl2; 5kl4; 4r2e; 4r2p; 4r2q; 5kl7; 4r2r; 6b0r; 5kl5; 6b0p; 2jpa; 2jp9; 6wlh; 2prt; 6blw; 4r2d; 1g2d; 1g2f; 4x9j; 4r2a; 4r2c; 1p47; 1aay; 1jk1; 1a1h; 1a1i; 1a1l; 1zaa; 1jk2; 1a1k; 1a1g; 1a1j; 1a1f; 1f2i; 1va1
					5'-d(*gp*tp*gp*gp*cp*gp*tp*gp*gp*gp*cp*gp*gp*cp*gp*tp*gp*gp*gp*cp*gp*t)-3'	polydeoxyribonucleotide		3.3259	1	1p47	1	40	5kl6; 4r2s; 5kl3; 6b0o; 6b0q; 5kl2; 5kl4; 4r2e; 4r2p; 4r2q; 5kl7; 4r2r; 6b0r; 5kl5; 6b0p; 2jpa; 2jp9; 6wlh; 2prt; 6blw; 4r2d; 1g2d; 1g2f; 4x9j; 4r2a; 4r2c; 1p47; 1aay; 1jk1; 1a1h; 1a1i; 1a1l; 1zaa; 1jk2; 1a1k; 1a1g; 1a1j; 1a1f; 1f2i; 1va1	40	5kl6; 4r2s; 5kl3; 6b0o; 6b0q; 5kl2; 5kl4; 4r2e; 4r2p; 4r2q; 5kl7; 4r2r; 6b0r; 5kl5; 6b0p; 2jpa; 2jp9; 6wlh; 2prt; 6blw; 4r2d; 1g2d; 1g2f; 4x9j; 4r2a; 4r2c; 1p47; 1aay; 1jk1; 1a1h; 1a1i; 1a1l; 1zaa; 1jk2; 1a1k; 1a1g; 1a1j; 1a1f; 1f2i; 1va1
					5'-d(*cp*ap*cp*gp*cp*cp*cp*ap*cp*gp*cp*cp*gp*cp*cp*cp*ap*cp*gp*cp*cp*a)-3'	polydeoxyribonucleotide		6.59063	1	1p47	1	40	5kl6; 4r2s; 5kl3; 6b0o; 6b0q; 5kl2; 5kl4; 4r2e; 4r2p; 4r2q; 5kl7; 4r2r; 6b0r; 5kl5; 6b0p; 2jpa; 2jp9; 6wlh; 2prt; 6blw; 4r2d; 1g2d; 1g2f; 4x9j; 4r2a; 4r2c; 1p47; 1aay; 1jk1; 1a1h; 1a1i; 1a1l; 1zaa; 1jk2; 1a1k; 1a1g; 1a1j; 1a1f; 1f2i; 1va1	40	5kl6; 4r2s; 5kl3; 6b0o; 6b0q; 5kl2; 5kl4; 4r2e; 4r2p; 4r2q; 5kl7; 4r2r; 6b0r; 5kl5; 6b0p; 2jpa; 2jp9; 6wlh; 2prt; 6blw; 4r2d; 1g2d; 1g2f; 4x9j; 4r2a; 4r2c; 1p47; 1aay; 1jk1; 1a1h; 1a1i; 1a1l; 1zaa; 1jk2; 1a1k; 1a1g; 1a1j; 1a1f; 1f2i; 1va1
					dna (5'-d(p*ap*ap*cp*ap*cp*tp*cp*cp*cp*ap*cp*gp*c)-3')	polydeoxyribonucleotide		7.02827	1	6b0q	0	40	5kl6; 4r2s; 5kl3; 6b0o; 6b0q; 5kl2; 5kl4; 4r2e; 4r2p; 4r2q; 5kl7; 4r2r; 6b0r; 5kl5; 6b0p; 2jpa; 2jp9; 6wlh; 2prt; 6blw; 4r2d; 1g2d; 1g2f; 4x9j; 4r2a; 4r2c; 1p47; 1aay; 1jk1; 1a1h; 1a1i; 1a1l; 1zaa; 1jk2; 1a1k; 1a1g; 1a1j; 1a1f; 1f2i; 1va1	40	5kl6; 4r2s; 5kl3; 6b0o; 6b0q; 5kl2; 5kl4; 4r2e; 4r2p; 4r2q; 5kl7; 4r2r; 6b0r; 5kl5; 6b0p; 2jpa; 2jp9; 6wlh; 2prt; 6blw; 4r2d; 1g2d; 1g2f; 4x9j; 4r2a; 4r2c; 1p47; 1aay; 1jk1; 1a1h; 1a1i; 1a1l; 1zaa; 1jk2; 1a1k; 1a1g; 1a1j; 1a1f; 1f2i; 1va1
					dna (5'-d(p*dcp*dap*dgp*dap*dcp*dgp*dcp*dcp*dcp*dcp*dcp*dgp*dcp*dg)-3')	polydeoxyribonucleotide		4.9743	1	2jpa	0	40	5kl6; 4r2s; 5kl3; 6b0o; 6b0q; 5kl2; 5kl4; 4r2e; 4r2p; 4r2q; 5kl7; 4r2r; 6b0r; 5kl5; 6b0p; 2jpa; 2jp9; 6wlh; 2prt; 6blw; 4r2d; 1g2d; 1g2f; 4x9j; 4r2a; 4r2c; 1p47; 1aay; 1jk1; 1a1h; 1a1i; 1a1l; 1zaa; 1jk2; 1a1k; 1a1g; 1a1j; 1a1f; 1f2i; 1va1	40	5kl6; 4r2s; 5kl3; 6b0o; 6b0q; 5kl2; 5kl4; 4r2e; 4r2p; 4r2q; 5kl7; 4r2r; 6b0r; 5kl5; 6b0p; 2jpa; 2jp9; 6wlh; 2prt; 6blw; 4r2d; 1g2d; 1g2f; 4x9j; 4r2a; 4r2c; 1p47; 1aay; 1jk1; 1a1h; 1a1i; 1a1l; 1zaa; 1jk2; 1a1k; 1a1g; 1a1j; 1a1f; 1f2i; 1va1
					dna (5'-d(p*tp*ap*ap*cp*cp*cp*tp*cp*cp*cp*ap*cp*gp*c)-3')	polydeoxyribonucleotide		6.83512	1	6b0r	0	40	5kl6; 4r2s; 5kl3; 6b0o; 6b0q; 5kl2; 5kl4; 4r2e; 4r2p; 4r2q; 5kl7; 4r2r; 6b0r; 5kl5; 6b0p; 2jpa; 2jp9; 6wlh; 2prt; 6blw; 4r2d; 1g2d; 1g2f; 4x9j; 4r2a; 4r2c; 1p47; 1aay; 1jk1; 1a1h; 1a1i; 1a1l; 1zaa; 1jk2; 1a1k; 1a1g; 1a1j; 1a1f; 1f2i; 1va1	40	5kl6; 4r2s; 5kl3; 6b0o; 6b0q; 5kl2; 5kl4; 4r2e; 4r2p; 4r2q; 5kl7; 4r2r; 6b0r; 5kl5; 6b0p; 2jpa; 2jp9; 6wlh; 2prt; 6blw; 4r2d; 1g2d; 1g2f; 4x9j; 4r2a; 4r2c; 1p47; 1aay; 1jk1; 1a1h; 1a1i; 1a1l; 1zaa; 1jk2; 1a1k; 1a1g; 1a1j; 1a1f; 1f2i; 1va1
					5'-d(*ap*gp*cp*gp*tp*gp*gp*gp*cp*gp*g)-3'	polydeoxyribonucleotide		3.05662	1	1jk1	1	40	5kl6; 4r2s; 5kl3; 6b0o; 6b0q; 5kl2; 5kl4; 4r2e; 4r2p; 4r2q; 5kl7; 4r2r; 6b0r; 5kl5; 6b0p; 2jpa; 2jp9; 6wlh; 2prt; 6blw; 4r2d; 1g2d; 1g2f; 4x9j; 4r2a; 4r2c; 1p47; 1aay; 1jk1; 1a1h; 1a1i; 1a1l; 1zaa; 1jk2; 1a1k; 1a1g; 1a1j; 1a1f; 1f2i; 1va1	40	5kl6; 4r2s; 5kl3; 6b0o; 6b0q; 5kl2; 5kl4; 4r2e; 4r2p; 4r2q; 5kl7; 4r2r; 6b0r; 5kl5; 6b0p; 2jpa; 2jp9; 6wlh; 2prt; 6blw; 4r2d; 1g2d; 1g2f; 4x9j; 4r2a; 4r2c; 1p47; 1aay; 1jk1; 1a1h; 1a1i; 1a1l; 1zaa; 1jk2; 1a1k; 1a1g; 1a1j; 1a1f; 1f2i; 1va1
					5'-d(*ap*gp*cp*gp*tp*gp*gp*gp*cp*tp*g)-3'	polydeoxyribonucleotide		2.8543	1	1jk2	1	40	5kl6; 4r2s; 5kl3; 6b0o; 6b0q; 5kl2; 5kl4; 4r2e; 4r2p; 4r2q; 5kl7; 4r2r; 6b0r; 5kl5; 6b0p; 2jpa; 2jp9; 6wlh; 2prt; 6blw; 4r2d; 1g2d; 1g2f; 4x9j; 4r2a; 4r2c; 1p47; 1aay; 1jk1; 1a1h; 1a1i; 1a1l; 1zaa; 1jk2; 1a1k; 1a1g; 1a1j; 1a1f; 1f2i; 1va1	40	5kl6; 4r2s; 5kl3; 6b0o; 6b0q; 5kl2; 5kl4; 4r2e; 4r2p; 4r2q; 5kl7; 4r2r; 6b0r; 5kl5; 6b0p; 2jpa; 2jp9; 6wlh; 2prt; 6blw; 4r2d; 1g2d; 1g2f; 4x9j; 4r2a; 4r2c; 1p47; 1aay; 1jk1; 1a1h; 1a1i; 1a1l; 1zaa; 1jk2; 1a1k; 1a1g; 1a1j; 1a1f; 1f2i; 1va1
					dna (5'-d(*ap*gp*cp*gp*tp*gp*gp*gp*gp*gp*t)-3')	polydeoxyribonucleotide		1.76291	1	5kl6	0	40	5kl6; 4r2s; 5kl3; 6b0o; 6b0q; 5kl2; 5kl4; 4r2e; 4r2p; 4r2q; 5kl7; 4r2r; 6b0r; 5kl5; 6b0p; 2jpa; 2jp9; 6wlh; 2prt; 6blw; 4r2d; 1g2d; 1g2f; 4x9j; 4r2a; 4r2c; 1p47; 1aay; 1jk1; 1a1h; 1a1i; 1a1l; 1zaa; 1jk2; 1a1k; 1a1g; 1a1j; 1a1f; 1f2i; 1va1	40	5kl6; 4r2s; 5kl3; 6b0o; 6b0q; 5kl2; 5kl4; 4r2e; 4r2p; 4r2q; 5kl7; 4r2r; 6b0r; 5kl5; 6b0p; 2jpa; 2jp9; 6wlh; 2prt; 6blw; 4r2d; 1g2d; 1g2f; 4x9j; 4r2a; 4r2c; 1p47; 1aay; 1jk1; 1a1h; 1a1i; 1a1l; 1zaa; 1jk2; 1a1k; 1a1g; 1a1j; 1a1f; 1f2i; 1va1
					dna (5'-d(p*ap*cp*cp*cp*tp*cp*cp*cp*ap*cp*gp*c)-3')	polydeoxyribonucleotide		6.57	1	6b0p	0	40	5kl6; 4r2s; 5kl3; 6b0o; 6b0q; 5kl2; 5kl4; 4r2e; 4r2p; 4r2q; 5kl7; 4r2r; 6b0r; 5kl5; 6b0p; 2jpa; 2jp9; 6wlh; 2prt; 6blw; 4r2d; 1g2d; 1g2f; 4x9j; 4r2a; 4r2c; 1p47; 1aay; 1jk1; 1a1h; 1a1i; 1a1l; 1zaa; 1jk2; 1a1k; 1a1g; 1a1j; 1a1f; 1f2i; 1va1	40	5kl6; 4r2s; 5kl3; 6b0o; 6b0q; 5kl2; 5kl4; 4r2e; 4r2p; 4r2q; 5kl7; 4r2r; 6b0r; 5kl5; 6b0p; 2jpa; 2jp9; 6wlh; 2prt; 6blw; 4r2d; 1g2d; 1g2f; 4x9j; 4r2a; 4r2c; 1p47; 1aay; 1jk1; 1a1h; 1a1i; 1a1l; 1zaa; 1jk2; 1a1k; 1a1g; 1a1j; 1a1f; 1f2i; 1va1
					dna (5'-d(p*dcp*dgp*dcp*dgp*dgp*dgp*dgp*dgp*dcp*dgp*dtp*dcp*dtp*dg)-3')	polydeoxyribonucleotide		1.69879	1	2jpa	0	40	5kl6; 4r2s; 5kl3; 6b0o; 6b0q; 5kl2; 5kl4; 4r2e; 4r2p; 4r2q; 5kl7; 4r2r; 6b0r; 5kl5; 6b0p; 2jpa; 2jp9; 6wlh; 2prt; 6blw; 4r2d; 1g2d; 1g2f; 4x9j; 4r2a; 4r2c; 1p47; 1aay; 1jk1; 1a1h; 1a1i; 1a1l; 1zaa; 1jk2; 1a1k; 1a1g; 1a1j; 1a1f; 1f2i; 1va1	40	5kl6; 4r2s; 5kl3; 6b0o; 6b0q; 5kl2; 5kl4; 4r2e; 4r2p; 4r2q; 5kl7; 4r2r; 6b0r; 5kl5; 6b0p; 2jpa; 2jp9; 6wlh; 2prt; 6blw; 4r2d; 1g2d; 1g2f; 4x9j; 4r2a; 4r2c; 1p47; 1aay; 1jk1; 1a1h; 1a1i; 1a1l; 1zaa; 1jk2; 1a1k; 1a1g; 1a1j; 1a1f; 1f2i; 1va1
					dna (5'-d(p*dcp*dgp*dcp*dgp*dgp*dgp*dgp*dgp*dcp*dgp*dtp*dcp*dtp*dgp*dcp*dgp*dc)-3')	polydeoxyribonucleotide		2.58361	1	2jp9	0	40	5kl6; 4r2s; 5kl3; 6b0o; 6b0q; 5kl2; 5kl4; 4r2e; 4r2p; 4r2q; 5kl7; 4r2r; 6b0r; 5kl5; 6b0p; 2jpa; 2jp9; 6wlh; 2prt; 6blw; 4r2d; 1g2d; 1g2f; 4x9j; 4r2a; 4r2c; 1p47; 1aay; 1jk1; 1a1h; 1a1i; 1a1l; 1zaa; 1jk2; 1a1k; 1a1g; 1a1j; 1a1f; 1f2i; 1va1	40	5kl6; 4r2s; 5kl3; 6b0o; 6b0q; 5kl2; 5kl4; 4r2e; 4r2p; 4r2q; 5kl7; 4r2r; 6b0r; 5kl5; 6b0p; 2jpa; 2jp9; 6wlh; 2prt; 6blw; 4r2d; 1g2d; 1g2f; 4x9j; 4r2a; 4r2c; 1p47; 1aay; 1jk1; 1a1h; 1a1i; 1a1l; 1zaa; 1jk2; 1a1k; 1a1g; 1a1j; 1a1f; 1f2i; 1va1
					dna (5'-d(p*dgp*dcp*dgp*dcp*dap*dgp*dap*dcp*dgp*dcp*dcp*dcp*dcp*dcp*dgp*dcp*dg)-3')	polydeoxyribonucleotide		4.87487	1	2jp9	0	40	5kl6; 4r2s; 5kl3; 6b0o; 6b0q; 5kl2; 5kl4; 4r2e; 4r2p; 4r2q; 5kl7; 4r2r; 6b0r; 5kl5; 6b0p; 2jpa; 2jp9; 6wlh; 2prt; 6blw; 4r2d; 1g2d; 1g2f; 4x9j; 4r2a; 4r2c; 1p47; 1aay; 1jk1; 1a1h; 1a1i; 1a1l; 1zaa; 1jk2; 1a1k; 1a1g; 1a1j; 1a1f; 1f2i; 1va1	40	5kl6; 4r2s; 5kl3; 6b0o; 6b0q; 5kl2; 5kl4; 4r2e; 4r2p; 4r2q; 5kl7; 4r2r; 6b0r; 5kl5; 6b0p; 2jpa; 2jp9; 6wlh; 2prt; 6blw; 4r2d; 1g2d; 1g2f; 4x9j; 4r2a; 4r2c; 1p47; 1aay; 1jk1; 1a1h; 1a1i; 1a1l; 1zaa; 1jk2; 1a1k; 1a1g; 1a1j; 1a1f; 1f2i; 1va1
					dna (5'-d(*ap*gp*(5cm)p*gp*tp*gp*gp*gp*(5cm)p*gp*t)-3')	polydeoxyribonucleotide		2.65306	1	4x9j	1	40	5kl6; 4r2s; 5kl3; 6b0o; 6b0q; 5kl2; 5kl4; 4r2e; 4r2p; 4r2q; 5kl7; 4r2r; 6b0r; 5kl5; 6b0p; 2jpa; 2jp9; 6wlh; 2prt; 6blw; 4r2d; 1g2d; 1g2f; 4x9j; 4r2a; 4r2c; 1p47; 1aay; 1jk1; 1a1h; 1a1i; 1a1l; 1zaa; 1jk2; 1a1k; 1a1g; 1a1j; 1a1f; 1f2i; 1va1	40	5kl6; 4r2s; 5kl3; 6b0o; 6b0q; 5kl2; 5kl4; 4r2e; 4r2p; 4r2q; 5kl7; 4r2r; 6b0r; 5kl5; 6b0p; 2jpa; 2jp9; 6wlh; 2prt; 6blw; 4r2d; 1g2d; 1g2f; 4x9j; 4r2a; 4r2c; 1p47; 1aay; 1jk1; 1a1h; 1a1i; 1a1l; 1zaa; 1jk2; 1a1k; 1a1g; 1a1j; 1a1f; 1f2i; 1va1
					dna (5'-d(*cp*gp*cp*gp*gp*gp*gp*gp*cp*gp*tp*cp*tp*g)-3')	polydeoxyribonucleotide		4.04969	1	2prt	0	40	5kl6; 4r2s; 5kl3; 6b0o; 6b0q; 5kl2; 5kl4; 4r2e; 4r2p; 4r2q; 5kl7; 4r2r; 6b0r; 5kl5; 6b0p; 2jpa; 2jp9; 6wlh; 2prt; 6blw; 4r2d; 1g2d; 1g2f; 4x9j; 4r2a; 4r2c; 1p47; 1aay; 1jk1; 1a1h; 1a1i; 1a1l; 1zaa; 1jk2; 1a1k; 1a1g; 1a1j; 1a1f; 1f2i; 1va1	40	5kl6; 4r2s; 5kl3; 6b0o; 6b0q; 5kl2; 5kl4; 4r2e; 4r2p; 4r2q; 5kl7; 4r2r; 6b0r; 5kl5; 6b0p; 2jpa; 2jp9; 6wlh; 2prt; 6blw; 4r2d; 1g2d; 1g2f; 4x9j; 4r2a; 4r2c; 1p47; 1aay; 1jk1; 1a1h; 1a1i; 1a1l; 1zaa; 1jk2; 1a1k; 1a1g; 1a1j; 1a1f; 1f2i; 1va1
					dna (5'-d(*tp*ap*cp*cp*cp*cp*cp*ap*cp*gp*c)-3')	polydeoxyribonucleotide		3.02649	1	5kl6	0	40	5kl6; 4r2s; 5kl3; 6b0o; 6b0q; 5kl2; 5kl4; 4r2e; 4r2p; 4r2q; 5kl7; 4r2r; 6b0r; 5kl5; 6b0p; 2jpa; 2jp9; 6wlh; 2prt; 6blw; 4r2d; 1g2d; 1g2f; 4x9j; 4r2a; 4r2c; 1p47; 1aay; 1jk1; 1a1h; 1a1i; 1a1l; 1zaa; 1jk2; 1a1k; 1a1g; 1a1j; 1a1f; 1f2i; 1va1	40	5kl6; 4r2s; 5kl3; 6b0o; 6b0q; 5kl2; 5kl4; 4r2e; 4r2p; 4r2q; 5kl7; 4r2r; 6b0r; 5kl5; 6b0p; 2jpa; 2jp9; 6wlh; 2prt; 6blw; 4r2d; 1g2d; 1g2f; 4x9j; 4r2a; 4r2c; 1p47; 1aay; 1jk1; 1a1h; 1a1i; 1a1l; 1zaa; 1jk2; 1a1k; 1a1g; 1a1j; 1a1f; 1f2i; 1va1
					5'-d(*tp*cp*ap*gp*cp*cp*cp*ap*cp*gp*c)-3'	polydeoxyribonucleotide		5.18894	1	1jk2	1	40	5kl6; 4r2s; 5kl3; 6b0o; 6b0q; 5kl2; 5kl4; 4r2e; 4r2p; 4r2q; 5kl7; 4r2r; 6b0r; 5kl5; 6b0p; 2jpa; 2jp9; 6wlh; 2prt; 6blw; 4r2d; 1g2d; 1g2f; 4x9j; 4r2a; 4r2c; 1p47; 1aay; 1jk1; 1a1h; 1a1i; 1a1l; 1zaa; 1jk2; 1a1k; 1a1g; 1a1j; 1a1f; 1f2i; 1va1	40	5kl6; 4r2s; 5kl3; 6b0o; 6b0q; 5kl2; 5kl4; 4r2e; 4r2p; 4r2q; 5kl7; 4r2r; 6b0r; 5kl5; 6b0p; 2jpa; 2jp9; 6wlh; 2prt; 6blw; 4r2d; 1g2d; 1g2f; 4x9j; 4r2a; 4r2c; 1p47; 1aay; 1jk1; 1a1h; 1a1i; 1a1l; 1zaa; 1jk2; 1a1k; 1a1g; 1a1j; 1a1f; 1f2i; 1va1
					dna (5'-d(*cp*ap*gp*ap*cp*gp*cp*cp*cp*cp*cp*gp*cp*g)-3')	polydeoxyribonucleotide		6.45077	1	2prt	0	40	5kl6; 4r2s; 5kl3; 6b0o; 6b0q; 5kl2; 5kl4; 4r2e; 4r2p; 4r2q; 5kl7; 4r2r; 6b0r; 5kl5; 6b0p; 2jpa; 2jp9; 6wlh; 2prt; 6blw; 4r2d; 1g2d; 1g2f; 4x9j; 4r2a; 4r2c; 1p47; 1aay; 1jk1; 1a1h; 1a1i; 1a1l; 1zaa; 1jk2; 1a1k; 1a1g; 1a1j; 1a1f; 1f2i; 1va1	40	5kl6; 4r2s; 5kl3; 6b0o; 6b0q; 5kl2; 5kl4; 4r2e; 4r2p; 4r2q; 5kl7; 4r2r; 6b0r; 5kl5; 6b0p; 2jpa; 2jp9; 6wlh; 2prt; 6blw; 4r2d; 1g2d; 1g2f; 4x9j; 4r2a; 4r2c; 1p47; 1aay; 1jk1; 1a1h; 1a1i; 1a1l; 1zaa; 1jk2; 1a1k; 1a1g; 1a1j; 1a1f; 1f2i; 1va1
					dna (5'-d(*tp*ap*cp*ap*cp*tp*cp*cp*cp*ap*cp*gp*c)-3')	polydeoxyribonucleotide		6.97486	1	6b0o	0	40	5kl6; 4r2s; 5kl3; 6b0o; 6b0q; 5kl2; 5kl4; 4r2e; 4r2p; 4r2q; 5kl7; 4r2r; 6b0r; 5kl5; 6b0p; 2jpa; 2jp9; 6wlh; 2prt; 6blw; 4r2d; 1g2d; 1g2f; 4x9j; 4r2a; 4r2c; 1p47; 1aay; 1jk1; 1a1h; 1a1i; 1a1l; 1zaa; 1jk2; 1a1k; 1a1g; 1a1j; 1a1f; 1f2i; 1va1	40	5kl6; 4r2s; 5kl3; 6b0o; 6b0q; 5kl2; 5kl4; 4r2e; 4r2p; 4r2q; 5kl7; 4r2r; 6b0r; 5kl5; 6b0p; 2jpa; 2jp9; 6wlh; 2prt; 6blw; 4r2d; 1g2d; 1g2f; 4x9j; 4r2a; 4r2c; 1p47; 1aay; 1jk1; 1a1h; 1a1i; 1a1l; 1zaa; 1jk2; 1a1k; 1a1g; 1a1j; 1a1f; 1f2i; 1va1
					dna (5'-d(p*gp*cp*gp*ap*ap*ap*tp*gp*gp*gp*ap*gp*gp*gp*tp*t)-3')	polydeoxyribonucleotide		4.22695	1	6blw	0	40	5kl6; 4r2s; 5kl3; 6b0o; 6b0q; 5kl2; 5kl4; 4r2e; 4r2p; 4r2q; 5kl7; 4r2r; 6b0r; 5kl5; 6b0p; 2jpa; 2jp9; 6wlh; 2prt; 6blw; 4r2d; 1g2d; 1g2f; 4x9j; 4r2a; 4r2c; 1p47; 1aay; 1jk1; 1a1h; 1a1i; 1a1l; 1zaa; 1jk2; 1a1k; 1a1g; 1a1j; 1a1f; 1f2i; 1va1	40	5kl6; 4r2s; 5kl3; 6b0o; 6b0q; 5kl2; 5kl4; 4r2e; 4r2p; 4r2q; 5kl7; 4r2r; 6b0r; 5kl5; 6b0p; 2jpa; 2jp9; 6wlh; 2prt; 6blw; 4r2d; 1g2d; 1g2f; 4x9j; 4r2a; 4r2c; 1p47; 1aay; 1jk1; 1a1h; 1a1i; 1a1l; 1zaa; 1jk2; 1a1k; 1a1g; 1a1j; 1a1f; 1f2i; 1va1
					5'-d(*tp*cp*cp*gp*cp*cp*cp*ap*cp*gp*c)-3'	polydeoxyribonucleotide		4.85924	1	1jk1	1	40	5kl6; 4r2s; 5kl3; 6b0o; 6b0q; 5kl2; 5kl4; 4r2e; 4r2p; 4r2q; 5kl7; 4r2r; 6b0r; 5kl5; 6b0p; 2jpa; 2jp9; 6wlh; 2prt; 6blw; 4r2d; 1g2d; 1g2f; 4x9j; 4r2a; 4r2c; 1p47; 1aay; 1jk1; 1a1h; 1a1i; 1a1l; 1zaa; 1jk2; 1a1k; 1a1g; 1a1j; 1a1f; 1f2i; 1va1	40	5kl6; 4r2s; 5kl3; 6b0o; 6b0q; 5kl2; 5kl4; 4r2e; 4r2p; 4r2q; 5kl7; 4r2r; 6b0r; 5kl5; 6b0p; 2jpa; 2jp9; 6wlh; 2prt; 6blw; 4r2d; 1g2d; 1g2f; 4x9j; 4r2a; 4r2c; 1p47; 1aay; 1jk1; 1a1h; 1a1i; 1a1l; 1zaa; 1jk2; 1a1k; 1a1g; 1a1j; 1a1f; 1f2i; 1va1
					dna (5'-d(*tp*ap*(5cm)p*gp*cp*cp*cp*ap*(5cm)p*gp*c)-3')	polydeoxyribonucleotide		6.65864	1	4x9j	1	40	5kl6; 4r2s; 5kl3; 6b0o; 6b0q; 5kl2; 5kl4; 4r2e; 4r2p; 4r2q; 5kl7; 4r2r; 6b0r; 5kl5; 6b0p; 2jpa; 2jp9; 6wlh; 2prt; 6blw; 4r2d; 1g2d; 1g2f; 4x9j; 4r2a; 4r2c; 1p47; 1aay; 1jk1; 1a1h; 1a1i; 1a1l; 1zaa; 1jk2; 1a1k; 1a1g; 1a1j; 1a1f; 1f2i; 1va1	40	5kl6; 4r2s; 5kl3; 6b0o; 6b0q; 5kl2; 5kl4; 4r2e; 4r2p; 4r2q; 5kl7; 4r2r; 6b0r; 5kl5; 6b0p; 2jpa; 2jp9; 6wlh; 2prt; 6blw; 4r2d; 1g2d; 1g2f; 4x9j; 4r2a; 4r2c; 1p47; 1aay; 1jk1; 1a1h; 1a1i; 1a1l; 1zaa; 1jk2; 1a1k; 1a1g; 1a1j; 1a1f; 1f2i; 1va1
					dna (5'-d(*tp*ap*ap*cp*cp*cp*tp*cp*cp*cp*ap*tp*tp*tp*cp*gp*c)-3')	polydeoxyribonucleotide		7.00017	1	6blw	0	40	5kl6; 4r2s; 5kl3; 6b0o; 6b0q; 5kl2; 5kl4; 4r2e; 4r2p; 4r2q; 5kl7; 4r2r; 6b0r; 5kl5; 6b0p; 2jpa; 2jp9; 6wlh; 2prt; 6blw; 4r2d; 1g2d; 1g2f; 4x9j; 4r2a; 4r2c; 1p47; 1aay; 1jk1; 1a1h; 1a1i; 1a1l; 1zaa; 1jk2; 1a1k; 1a1g; 1a1j; 1a1f; 1f2i; 1va1	40	5kl6; 4r2s; 5kl3; 6b0o; 6b0q; 5kl2; 5kl4; 4r2e; 4r2p; 4r2q; 5kl7; 4r2r; 6b0r; 5kl5; 6b0p; 2jpa; 2jp9; 6wlh; 2prt; 6blw; 4r2d; 1g2d; 1g2f; 4x9j; 4r2a; 4r2c; 1p47; 1aay; 1jk1; 1a1h; 1a1i; 1a1l; 1zaa; 1jk2; 1a1k; 1a1g; 1a1j; 1a1f; 1f2i; 1va1
2	EIF5B	NP_056988.3	H639L	-5.758	magnesium ion	bound	MG	4.5468	12	7syx; 7syw; 7syv; 4ncf; 4ncl; 4ncn; 4tmw; 4tmt; 4tmv; 4tmx; 4tmz; 4tn1	12	23	7syx; 7syw; 7syv; 4ujd; 4ujc; 6uz7; 6woo; 3wbk; 5fg3; 4ncf; 1g7s; 1g7t; 4ncl; 4v8z; 4v8y; 5yt0; 4ncn; 4tmw; 4tmt; 4tmv; 4tmx; 4tmz; 4tn1	26	7syx; 7syw; 7syv; 4ujd; 4ujc; 6uz7; 6woo; 3wbk; 3wbi; 5fg3; 4ncf; 3wbj; 4n3s; 1g7s; 1g7t; 4ncl; 4v8z; 4v8y; 5yt0; 4ncn; 4tmw; 4tmt; 4tmv; 4tmx; 4tmz; 4tn1
					sodium ion	bound		6.68363	6	7syw; 7syv; 4ncn; 4tmw; 4tmv; 4tmx	6	23	7syx; 7syw; 7syv; 4ujd; 4ujc; 6uz7; 6woo; 3wbk; 5fg3; 4ncf; 1g7s; 1g7t; 4ncl; 4v8z; 4v8y; 5yt0; 4ncn; 4tmw; 4tmt; 4tmv; 4tmx; 4tmz; 4tn1	26	7syx; 7syw; 7syv; 4ujd; 4ujc; 6uz7; 6woo; 3wbk; 3wbi; 5fg3; 4ncf; 3wbj; 4n3s; 1g7s; 1g7t; 4ncl; 4v8z; 4v8y; 5yt0; 4ncn; 4tmw; 4tmt; 4tmv; 4tmx; 4tmz; 4tn1
					guanosine-5'-triphosphate	bound	GTP	2.9408	6	7syx; 7syw; 7syv; 4ncn; 4tmw; 4tmx	6	23	7syx; 7syw; 7syv; 4ujd; 4ujc; 6uz7; 6woo; 3wbk; 5fg3; 4ncf; 1g7s; 1g7t; 4ncl; 4v8z; 4v8y; 5yt0; 4ncn; 4tmw; 4tmt; 4tmv; 4tmx; 4tmz; 4tn1	26	7syx; 7syw; 7syv; 4ujd; 4ujc; 6uz7; 6woo; 3wbk; 3wbi; 5fg3; 4ncf; 3wbj; 4n3s; 1g7s; 1g7t; 4ncl; 4v8z; 4v8y; 5yt0; 4ncn; 4tmw; 4tmt; 4tmv; 4tmx; 4tmz; 4tn1
					guanosine-5'-diphosphate	bound	GDP	3.27601	6	6woo; 5fg3; 4ncf; 1g7s; 4ncl; 5yt0	6	23	7syx; 7syw; 7syv; 4ujd; 4ujc; 6uz7; 6woo; 3wbk; 5fg3; 4ncf; 1g7s; 1g7t; 4ncl; 4v8z; 4v8y; 5yt0; 4ncn; 4tmw; 4tmt; 4tmv; 4tmx; 4tmz; 4tn1	26	7syx; 7syw; 7syv; 4ujd; 4ujc; 6uz7; 6woo; 3wbk; 3wbi; 5fg3; 4ncf; 3wbj; 4n3s; 1g7s; 1g7t; 4ncl; 4v8z; 4v8y; 5yt0; 4ncn; 4tmw; 4tmt; 4tmv; 4tmx; 4tmz; 4tn1
					25s ribosomal rna	polyribonucleotide		2.60983	4	6uz7; 6woo; 4v8z; 4v8y	4	23	7syx; 7syw; 7syv; 4ujd; 4ujc; 6uz7; 6woo; 3wbk; 5fg3; 4ncf; 1g7s; 1g7t; 4ncl; 4v8z; 4v8y; 5yt0; 4ncn; 4tmw; 4tmt; 4tmv; 4tmx; 4tmz; 4tn1	26	7syx; 7syw; 7syv; 4ujd; 4ujc; 6uz7; 6woo; 3wbk; 3wbi; 5fg3; 4ncf; 3wbj; 4n3s; 1g7s; 1g7t; 4ncl; 4v8z; 4v8y; 5yt0; 4ncn; 4tmw; 4tmt; 4tmv; 4tmx; 4tmz; 4tn1
					5'-guanosine-diphosphate-monothiophosphate	bound	GSP	3.8824	4	4tmt; 4tmv; 4tmz; 4tn1	4	23	7syx; 7syw; 7syv; 4ujd; 4ujc; 6uz7; 6woo; 3wbk; 5fg3; 4ncf; 1g7s; 1g7t; 4ncl; 4v8z; 4v8y; 5yt0; 4ncn; 4tmw; 4tmt; 4tmv; 4tmx; 4tmz; 4tn1	26	7syx; 7syw; 7syv; 4ujd; 4ujc; 6uz7; 6woo; 3wbk; 3wbi; 5fg3; 4ncf; 3wbj; 4n3s; 1g7s; 1g7t; 4ncl; 4v8z; 4v8y; 5yt0; 4ncn; 4tmw; 4tmt; 4tmv; 4tmx; 4tmz; 4tn1
					phosphoaminophosphonic acid-guanylate ester	bound	GNP	3.64881	3	4ujd; 4ujc; 1g7t	3	23	7syx; 7syw; 7syv; 4ujd; 4ujc; 6uz7; 6woo; 3wbk; 5fg3; 4ncf; 1g7s; 1g7t; 4ncl; 4v8z; 4v8y; 5yt0; 4ncn; 4tmw; 4tmt; 4tmv; 4tmx; 4tmz; 4tn1	26	7syx; 7syw; 7syv; 4ujd; 4ujc; 6uz7; 6woo; 3wbk; 3wbi; 5fg3; 4ncf; 3wbj; 4n3s; 1g7s; 1g7t; 4ncl; 4v8z; 4v8y; 5yt0; 4ncn; 4tmw; 4tmt; 4tmv; 4tmx; 4tmz; 4tn1
					phosphomethylphosphonic acid guanylate ester	bound	GCP	3.04634	3	6uz7; 4v8z; 4v8y	3	23	7syx; 7syw; 7syv; 4ujd; 4ujc; 6uz7; 6woo; 3wbk; 5fg3; 4ncf; 1g7s; 1g7t; 4ncl; 4v8z; 4v8y; 5yt0; 4ncn; 4tmw; 4tmt; 4tmv; 4tmx; 4tmz; 4tn1	26	7syx; 7syw; 7syv; 4ujd; 4ujc; 6uz7; 6woo; 3wbk; 3wbi; 5fg3; 4ncf; 3wbj; 4n3s; 1g7s; 1g7t; 4ncl; 4v8z; 4v8y; 5yt0; 4ncn; 4tmw; 4tmt; 4tmv; 4tmx; 4tmz; 4tn1
					28s ribosomal rna	polyribonucleotide		1.47079	2	4ujd; 4ujc	2	23	7syx; 7syw; 7syv; 4ujd; 4ujc; 6uz7; 6woo; 3wbk; 5fg3; 4ncf; 1g7s; 1g7t; 4ncl; 4v8z; 4v8y; 5yt0; 4ncn; 4tmw; 4tmt; 4tmv; 4tmx; 4tmz; 4tn1	26	7syx; 7syw; 7syv; 4ujd; 4ujc; 6uz7; 6woo; 3wbk; 3wbi; 5fg3; 4ncf; 3wbj; 4n3s; 1g7s; 1g7t; 4ncl; 4v8z; 4v8y; 5yt0; 4ncn; 4tmw; 4tmt; 4tmv; 4tmx; 4tmz; 4tn1
14	DCAF5	NP_003852.1	C349R	-5.747					0		0	0		0
X	BTK	NP_000052.1	V427M	-5.731	2-(2-methoxyethoxy)ethanol	bound	PG0	4.47606	3	4rx5; 5vgo; 5kup	3	85	8gmb; 4y93; 8s93; 4xi2; 5j87; 6tfp; 7r60; 7kxm; 6omu; 7kxp; 6nfh; 5p9i; 5vfi; 5p9k; 5u9d; 6n9p; 4z3v; 5p9m; 6di5; 6di1; 6di0; 7n5y; 7n5r; 8e2m; 8ejb; 6e4f; 7kxq; 7n5o; 4zly; 4zlz; 4yhf; 7n5x; 3pix; 7l5p; 6w06; 6x3o; 7l5o; 8flv; 7kxl; 6j6m; 5p9f; 8flh; 7r61; 6x3p; 7kxn; 4ot6; 5bq0; 7kxo; 6bkw; 7ltz; 5p9g; 3gen; 8fll; 6nzm; 5p9h; 6w07; 4rx5; 5vgo; 7yc9; 5kup; 6w8i; 6bln; 6w7o; 4ot5; 6ep9; 5zz4; 6hr…	85	8gmb; 4y93; 8s93; 4xi2; 5j87; 6tfp; 7r60; 7kxm; 6omu; 7kxp; 6nfh; 5p9i; 5vfi; 5p9k; 5u9d; 6n9p; 4z3v; 5p9m; 6di5; 6di1; 6di0; 7n5y; 7n5r; 8e2m; 8ejb; 6e4f; 7kxq; 7n5o; 4zly; 4zlz; 4yhf; 7n5x; 3pix; 7l5p; 6w06; 6x3o; 7l5o; 8flv; 7kxl; 6j6m; 5p9f; 8flh; 7r61; 6x3p; 7kxn; 4ot6; 5bq0; 7kxo; 6bkw; 7ltz; 5p9g; 3gen; 8fll; 6nzm; 5p9h; 6w07; 4rx5; 5vgo; 7yc9; 5kup; 6w8i; 6bln; 6w7o; 4ot5; 6ep9; 5zz4; 6hr…
					2-[3'-(hydroxymethyl)-1-methyl-5-({5-[(2s)-2-methyl-4-(oxetan-3-yl)piperazin-1-yl]pyridin-2-yl}amino)-6-oxo[1,6-dihydro[3,4'-bipyridine]]-2'-yl]-7,7-dimethyl-3,4,7,8-tetrahydro-2h-cyclopenta[4,5]pyrrolo[1,2-a]pyrazin-1(6h)-one	bound	9AJ	5.67403	3	8gmb; 8s93; 5vfi	3	85	8gmb; 4y93; 8s93; 4xi2; 5j87; 6tfp; 7r60; 7kxm; 6omu; 7kxp; 6nfh; 5p9i; 5vfi; 5p9k; 5u9d; 6n9p; 4z3v; 5p9m; 6di5; 6di1; 6di0; 7n5y; 7n5r; 8e2m; 8ejb; 6e4f; 7kxq; 7n5o; 4zly; 4zlz; 4yhf; 7n5x; 3pix; 7l5p; 6w06; 6x3o; 7l5o; 8flv; 7kxl; 6j6m; 5p9f; 8flh; 7r61; 6x3p; 7kxn; 4ot6; 5bq0; 7kxo; 6bkw; 7ltz; 5p9g; 3gen; 8fll; 6nzm; 5p9h; 6w07; 4rx5; 5vgo; 7yc9; 5kup; 6w8i; 6bln; 6w7o; 4ot5; 6ep9; 5zz4; 6hr…	85	8gmb; 4y93; 8s93; 4xi2; 5j87; 6tfp; 7r60; 7kxm; 6omu; 7kxp; 6nfh; 5p9i; 5vfi; 5p9k; 5u9d; 6n9p; 4z3v; 5p9m; 6di5; 6di1; 6di0; 7n5y; 7n5r; 8e2m; 8ejb; 6e4f; 7kxq; 7n5o; 4zly; 4zlz; 4yhf; 7n5x; 3pix; 7l5p; 6w06; 6x3o; 7l5o; 8flv; 7kxl; 6j6m; 5p9f; 8flh; 7r61; 6x3p; 7kxn; 4ot6; 5bq0; 7kxo; 6bkw; 7ltz; 5p9g; 3gen; 8fll; 6nzm; 5p9h; 6w07; 4rx5; 5vgo; 7yc9; 5kup; 6w8i; 6bln; 6w7o; 4ot5; 6ep9; 5zz4; 6hr…
					imidazole	bound	IMD	3.87201	3	4z3v; 4zly; 4zlz	3	85	8gmb; 4y93; 8s93; 4xi2; 5j87; 6tfp; 7r60; 7kxm; 6omu; 7kxp; 6nfh; 5p9i; 5vfi; 5p9k; 5u9d; 6n9p; 4z3v; 5p9m; 6di5; 6di1; 6di0; 7n5y; 7n5r; 8e2m; 8ejb; 6e4f; 7kxq; 7n5o; 4zly; 4zlz; 4yhf; 7n5x; 3pix; 7l5p; 6w06; 6x3o; 7l5o; 8flv; 7kxl; 6j6m; 5p9f; 8flh; 7r61; 6x3p; 7kxn; 4ot6; 5bq0; 7kxo; 6bkw; 7ltz; 5p9g; 3gen; 8fll; 6nzm; 5p9h; 6w07; 4rx5; 5vgo; 7yc9; 5kup; 6w8i; 6bln; 6w7o; 4ot5; 6ep9; 5zz4; 6hr…	85	8gmb; 4y93; 8s93; 4xi2; 5j87; 6tfp; 7r60; 7kxm; 6omu; 7kxp; 6nfh; 5p9i; 5vfi; 5p9k; 5u9d; 6n9p; 4z3v; 5p9m; 6di5; 6di1; 6di0; 7n5y; 7n5r; 8e2m; 8ejb; 6e4f; 7kxq; 7n5o; 4zly; 4zlz; 4yhf; 7n5x; 3pix; 7l5p; 6w06; 6x3o; 7l5o; 8flv; 7kxl; 6j6m; 5p9f; 8flh; 7r61; 6x3p; 7kxn; 4ot6; 5bq0; 7kxo; 6bkw; 7ltz; 5p9g; 3gen; 8fll; 6nzm; 5p9h; 6w07; 4rx5; 5vgo; 7yc9; 5kup; 6w8i; 6bln; 6w7o; 4ot5; 6ep9; 5zz4; 6hr…
					(2e)-2-{(3r)-3-[4-amino-3-(2-fluoro-4-phenoxyphenyl)-1h-pyrazolo[3,4-d]pyrimidin-1-yl]piperidine-1-carbonyl}-4-methyl-4-[4-(oxetan-3-yl)piperazin-1-yl]pent-2-enenitrile	bound	R1L	6.21407	2	7l5p; 7l5o	2	85	8gmb; 4y93; 8s93; 4xi2; 5j87; 6tfp; 7r60; 7kxm; 6omu; 7kxp; 6nfh; 5p9i; 5vfi; 5p9k; 5u9d; 6n9p; 4z3v; 5p9m; 6di5; 6di1; 6di0; 7n5y; 7n5r; 8e2m; 8ejb; 6e4f; 7kxq; 7n5o; 4zly; 4zlz; 4yhf; 7n5x; 3pix; 7l5p; 6w06; 6x3o; 7l5o; 8flv; 7kxl; 6j6m; 5p9f; 8flh; 7r61; 6x3p; 7kxn; 4ot6; 5bq0; 7kxo; 6bkw; 7ltz; 5p9g; 3gen; 8fll; 6nzm; 5p9h; 6w07; 4rx5; 5vgo; 7yc9; 5kup; 6w8i; 6bln; 6w7o; 4ot5; 6ep9; 5zz4; 6hr…	85	8gmb; 4y93; 8s93; 4xi2; 5j87; 6tfp; 7r60; 7kxm; 6omu; 7kxp; 6nfh; 5p9i; 5vfi; 5p9k; 5u9d; 6n9p; 4z3v; 5p9m; 6di5; 6di1; 6di0; 7n5y; 7n5r; 8e2m; 8ejb; 6e4f; 7kxq; 7n5o; 4zly; 4zlz; 4yhf; 7n5x; 3pix; 7l5p; 6w06; 6x3o; 7l5o; 8flv; 7kxl; 6j6m; 5p9f; 8flh; 7r61; 6x3p; 7kxn; 4ot6; 5bq0; 7kxo; 6bkw; 7ltz; 5p9g; 3gen; 8fll; 6nzm; 5p9h; 6w07; 4rx5; 5vgo; 7yc9; 5kup; 6w8i; 6bln; 6w7o; 4ot5; 6ep9; 5zz4; 6hr…
					4-tert-butyl-n-[2-methyl-3-(4-methyl-6-{[4-(morpholin-4-ylcarbonyl)phenyl]amino}-5-oxo-4,5-dihydropyrazin-2-yl)phenyl]benzamide	bound	746	5.62926	2	4y93; 3ocs	2	85	8gmb; 4y93; 8s93; 4xi2; 5j87; 6tfp; 7r60; 7kxm; 6omu; 7kxp; 6nfh; 5p9i; 5vfi; 5p9k; 5u9d; 6n9p; 4z3v; 5p9m; 6di5; 6di1; 6di0; 7n5y; 7n5r; 8e2m; 8ejb; 6e4f; 7kxq; 7n5o; 4zly; 4zlz; 4yhf; 7n5x; 3pix; 7l5p; 6w06; 6x3o; 7l5o; 8flv; 7kxl; 6j6m; 5p9f; 8flh; 7r61; 6x3p; 7kxn; 4ot6; 5bq0; 7kxo; 6bkw; 7ltz; 5p9g; 3gen; 8fll; 6nzm; 5p9h; 6w07; 4rx5; 5vgo; 7yc9; 5kup; 6w8i; 6bln; 6w7o; 4ot5; 6ep9; 5zz4; 6hr…	85	8gmb; 4y93; 8s93; 4xi2; 5j87; 6tfp; 7r60; 7kxm; 6omu; 7kxp; 6nfh; 5p9i; 5vfi; 5p9k; 5u9d; 6n9p; 4z3v; 5p9m; 6di5; 6di1; 6di0; 7n5y; 7n5r; 8e2m; 8ejb; 6e4f; 7kxq; 7n5o; 4zly; 4zlz; 4yhf; 7n5x; 3pix; 7l5p; 6w06; 6x3o; 7l5o; 8flv; 7kxl; 6j6m; 5p9f; 8flh; 7r61; 6x3p; 7kxn; 4ot6; 5bq0; 7kxo; 6bkw; 7ltz; 5p9g; 3gen; 8fll; 6nzm; 5p9h; 6w07; 4rx5; 5vgo; 7yc9; 5kup; 6w8i; 6bln; 6w7o; 4ot5; 6ep9; 5zz4; 6hr…
					isopropyl alcohol	bound	IPA	6.07865	2	4zly; 4zlz	2	85	8gmb; 4y93; 8s93; 4xi2; 5j87; 6tfp; 7r60; 7kxm; 6omu; 7kxp; 6nfh; 5p9i; 5vfi; 5p9k; 5u9d; 6n9p; 4z3v; 5p9m; 6di5; 6di1; 6di0; 7n5y; 7n5r; 8e2m; 8ejb; 6e4f; 7kxq; 7n5o; 4zly; 4zlz; 4yhf; 7n5x; 3pix; 7l5p; 6w06; 6x3o; 7l5o; 8flv; 7kxl; 6j6m; 5p9f; 8flh; 7r61; 6x3p; 7kxn; 4ot6; 5bq0; 7kxo; 6bkw; 7ltz; 5p9g; 3gen; 8fll; 6nzm; 5p9h; 6w07; 4rx5; 5vgo; 7yc9; 5kup; 6w8i; 6bln; 6w7o; 4ot5; 6ep9; 5zz4; 6hr…	85	8gmb; 4y93; 8s93; 4xi2; 5j87; 6tfp; 7r60; 7kxm; 6omu; 7kxp; 6nfh; 5p9i; 5vfi; 5p9k; 5u9d; 6n9p; 4z3v; 5p9m; 6di5; 6di1; 6di0; 7n5y; 7n5r; 8e2m; 8ejb; 6e4f; 7kxq; 7n5o; 4zly; 4zlz; 4yhf; 7n5x; 3pix; 7l5p; 6w06; 6x3o; 7l5o; 8flv; 7kxl; 6j6m; 5p9f; 8flh; 7r61; 6x3p; 7kxn; 4ot6; 5bq0; 7kxo; 6bkw; 7ltz; 5p9g; 3gen; 8fll; 6nzm; 5p9h; 6w07; 4rx5; 5vgo; 7yc9; 5kup; 6w8i; 6bln; 6w7o; 4ot5; 6ep9; 5zz4; 6hr…
					pirtobrutinib	bound	Y7W	6.2316	2	8fll; 8fln	2	85	8gmb; 4y93; 8s93; 4xi2; 5j87; 6tfp; 7r60; 7kxm; 6omu; 7kxp; 6nfh; 5p9i; 5vfi; 5p9k; 5u9d; 6n9p; 4z3v; 5p9m; 6di5; 6di1; 6di0; 7n5y; 7n5r; 8e2m; 8ejb; 6e4f; 7kxq; 7n5o; 4zly; 4zlz; 4yhf; 7n5x; 3pix; 7l5p; 6w06; 6x3o; 7l5o; 8flv; 7kxl; 6j6m; 5p9f; 8flh; 7r61; 6x3p; 7kxn; 4ot6; 5bq0; 7kxo; 6bkw; 7ltz; 5p9g; 3gen; 8fll; 6nzm; 5p9h; 6w07; 4rx5; 5vgo; 7yc9; 5kup; 6w8i; 6bln; 6w7o; 4ot5; 6ep9; 5zz4; 6hr…	85	8gmb; 4y93; 8s93; 4xi2; 5j87; 6tfp; 7r60; 7kxm; 6omu; 7kxp; 6nfh; 5p9i; 5vfi; 5p9k; 5u9d; 6n9p; 4z3v; 5p9m; 6di5; 6di1; 6di0; 7n5y; 7n5r; 8e2m; 8ejb; 6e4f; 7kxq; 7n5o; 4zly; 4zlz; 4yhf; 7n5x; 3pix; 7l5p; 6w06; 6x3o; 7l5o; 8flv; 7kxl; 6j6m; 5p9f; 8flh; 7r61; 6x3p; 7kxn; 4ot6; 5bq0; 7kxo; 6bkw; 7ltz; 5p9g; 3gen; 8fll; 6nzm; 5p9h; 6w07; 4rx5; 5vgo; 7yc9; 5kup; 6w8i; 6bln; 6w7o; 4ot5; 6ep9; 5zz4; 6hr…
					n-[3-(4-amino-6-{[4-(morpholine-4-carbonyl)phenyl]amino}-1,3,5-triazin-2-yl)-2-methylphenyl]-4-tert-butylbenzamide	bound	9M3	6.3674	1	5zz4	1	85	8gmb; 4y93; 8s93; 4xi2; 5j87; 6tfp; 7r60; 7kxm; 6omu; 7kxp; 6nfh; 5p9i; 5vfi; 5p9k; 5u9d; 6n9p; 4z3v; 5p9m; 6di5; 6di1; 6di0; 7n5y; 7n5r; 8e2m; 8ejb; 6e4f; 7kxq; 7n5o; 4zly; 4zlz; 4yhf; 7n5x; 3pix; 7l5p; 6w06; 6x3o; 7l5o; 8flv; 7kxl; 6j6m; 5p9f; 8flh; 7r61; 6x3p; 7kxn; 4ot6; 5bq0; 7kxo; 6bkw; 7ltz; 5p9g; 3gen; 8fll; 6nzm; 5p9h; 6w07; 4rx5; 5vgo; 7yc9; 5kup; 6w8i; 6bln; 6w7o; 4ot5; 6ep9; 5zz4; 6hr…	85	8gmb; 4y93; 8s93; 4xi2; 5j87; 6tfp; 7r60; 7kxm; 6omu; 7kxp; 6nfh; 5p9i; 5vfi; 5p9k; 5u9d; 6n9p; 4z3v; 5p9m; 6di5; 6di1; 6di0; 7n5y; 7n5r; 8e2m; 8ejb; 6e4f; 7kxq; 7n5o; 4zly; 4zlz; 4yhf; 7n5x; 3pix; 7l5p; 6w06; 6x3o; 7l5o; 8flv; 7kxl; 6j6m; 5p9f; 8flh; 7r61; 6x3p; 7kxn; 4ot6; 5bq0; 7kxo; 6bkw; 7ltz; 5p9g; 3gen; 8fll; 6nzm; 5p9h; 6w07; 4rx5; 5vgo; 7yc9; 5kup; 6w8i; 6bln; 6w7o; 4ot5; 6ep9; 5zz4; 6hr…
					~{n}-[3-[6-azanyl-5-[2-[methyl(propanoyl)amino]ethoxy]pyrimidin-4-yl]-5-fluoranyl-2-methyl-phenyl]-4-cyclopropyl-2-fluoranyl-benzamide	bound	N6Z	6.31084	1	6tfp	1	85	8gmb; 4y93; 8s93; 4xi2; 5j87; 6tfp; 7r60; 7kxm; 6omu; 7kxp; 6nfh; 5p9i; 5vfi; 5p9k; 5u9d; 6n9p; 4z3v; 5p9m; 6di5; 6di1; 6di0; 7n5y; 7n5r; 8e2m; 8ejb; 6e4f; 7kxq; 7n5o; 4zly; 4zlz; 4yhf; 7n5x; 3pix; 7l5p; 6w06; 6x3o; 7l5o; 8flv; 7kxl; 6j6m; 5p9f; 8flh; 7r61; 6x3p; 7kxn; 4ot6; 5bq0; 7kxo; 6bkw; 7ltz; 5p9g; 3gen; 8fll; 6nzm; 5p9h; 6w07; 4rx5; 5vgo; 7yc9; 5kup; 6w8i; 6bln; 6w7o; 4ot5; 6ep9; 5zz4; 6hr…	85	8gmb; 4y93; 8s93; 4xi2; 5j87; 6tfp; 7r60; 7kxm; 6omu; 7kxp; 6nfh; 5p9i; 5vfi; 5p9k; 5u9d; 6n9p; 4z3v; 5p9m; 6di5; 6di1; 6di0; 7n5y; 7n5r; 8e2m; 8ejb; 6e4f; 7kxq; 7n5o; 4zly; 4zlz; 4yhf; 7n5x; 3pix; 7l5p; 6w06; 6x3o; 7l5o; 8flv; 7kxl; 6j6m; 5p9f; 8flh; 7r61; 6x3p; 7kxn; 4ot6; 5bq0; 7kxo; 6bkw; 7ltz; 5p9g; 3gen; 8fll; 6nzm; 5p9h; 6w07; 4rx5; 5vgo; 7yc9; 5kup; 6w8i; 6bln; 6w7o; 4ot5; 6ep9; 5zz4; 6hr…
					n-[3-(5-{[3-(acryloylamino)-4-(morpholine-4-carbonyl)phenyl]amino}-1-methyl-6-oxo-1,6-dihydropyridin-3-yl)-2-methylphenyl]-4-tert-butylbenzamide	bound	N42	5.89279	1	5j87	1	85	8gmb; 4y93; 8s93; 4xi2; 5j87; 6tfp; 7r60; 7kxm; 6omu; 7kxp; 6nfh; 5p9i; 5vfi; 5p9k; 5u9d; 6n9p; 4z3v; 5p9m; 6di5; 6di1; 6di0; 7n5y; 7n5r; 8e2m; 8ejb; 6e4f; 7kxq; 7n5o; 4zly; 4zlz; 4yhf; 7n5x; 3pix; 7l5p; 6w06; 6x3o; 7l5o; 8flv; 7kxl; 6j6m; 5p9f; 8flh; 7r61; 6x3p; 7kxn; 4ot6; 5bq0; 7kxo; 6bkw; 7ltz; 5p9g; 3gen; 8fll; 6nzm; 5p9h; 6w07; 4rx5; 5vgo; 7yc9; 5kup; 6w8i; 6bln; 6w7o; 4ot5; 6ep9; 5zz4; 6hr…	85	8gmb; 4y93; 8s93; 4xi2; 5j87; 6tfp; 7r60; 7kxm; 6omu; 7kxp; 6nfh; 5p9i; 5vfi; 5p9k; 5u9d; 6n9p; 4z3v; 5p9m; 6di5; 6di1; 6di0; 7n5y; 7n5r; 8e2m; 8ejb; 6e4f; 7kxq; 7n5o; 4zly; 4zlz; 4yhf; 7n5x; 3pix; 7l5p; 6w06; 6x3o; 7l5o; 8flv; 7kxl; 6j6m; 5p9f; 8flh; 7r61; 6x3p; 7kxn; 4ot6; 5bq0; 7kxo; 6bkw; 7ltz; 5p9g; 3gen; 8fll; 6nzm; 5p9h; 6w07; 4rx5; 5vgo; 7yc9; 5kup; 6w8i; 6bln; 6w7o; 4ot5; 6ep9; 5zz4; 6hr…
					14-{[(3s)-2-(n-methyl-l-alanyl-3-methyl-l-valyl)-3-{[(1r)-1,2,3,4-tetrahydronaphthalen-1-yl]carbamoyl}-1,2,3,4-tetrahydroisoquinolin-7-yl]oxy}-3,6,9,12-tetraoxatetradecan-1-yl (3r)-3-{5-amino-4-carbamoyl-3-[4-(2,4-difluorophenoxy)phenyl]-1h-pyrazol-1-yl}piperidine-1-carboxylate	bound	TKY	5.73951	1	6w8i	1	85	8gmb; 4y93; 8s93; 4xi2; 5j87; 6tfp; 7r60; 7kxm; 6omu; 7kxp; 6nfh; 5p9i; 5vfi; 5p9k; 5u9d; 6n9p; 4z3v; 5p9m; 6di5; 6di1; 6di0; 7n5y; 7n5r; 8e2m; 8ejb; 6e4f; 7kxq; 7n5o; 4zly; 4zlz; 4yhf; 7n5x; 3pix; 7l5p; 6w06; 6x3o; 7l5o; 8flv; 7kxl; 6j6m; 5p9f; 8flh; 7r61; 6x3p; 7kxn; 4ot6; 5bq0; 7kxo; 6bkw; 7ltz; 5p9g; 3gen; 8fll; 6nzm; 5p9h; 6w07; 4rx5; 5vgo; 7yc9; 5kup; 6w8i; 6bln; 6w7o; 4ot5; 6ep9; 5zz4; 6hr…	85	8gmb; 4y93; 8s93; 4xi2; 5j87; 6tfp; 7r60; 7kxm; 6omu; 7kxp; 6nfh; 5p9i; 5vfi; 5p9k; 5u9d; 6n9p; 4z3v; 5p9m; 6di5; 6di1; 6di0; 7n5y; 7n5r; 8e2m; 8ejb; 6e4f; 7kxq; 7n5o; 4zly; 4zlz; 4yhf; 7n5x; 3pix; 7l5p; 6w06; 6x3o; 7l5o; 8flv; 7kxl; 6j6m; 5p9f; 8flh; 7r61; 6x3p; 7kxn; 4ot6; 5bq0; 7kxo; 6bkw; 7ltz; 5p9g; 3gen; 8fll; 6nzm; 5p9h; 6w07; 4rx5; 5vgo; 7yc9; 5kup; 6w8i; 6bln; 6w7o; 4ot5; 6ep9; 5zz4; 6hr…
					(2s)-2-({(3r)-3-[4-amino-3-(4-phenoxyphenyl)-1h-pyrazolo[3,4-d]pyrimidin-1-yl]piperidin-1-yl}carbonyl)-4,4-dimethylpentanenitrile	bound	4C9	5.41721	1	4yhf	1	85	8gmb; 4y93; 8s93; 4xi2; 5j87; 6tfp; 7r60; 7kxm; 6omu; 7kxp; 6nfh; 5p9i; 5vfi; 5p9k; 5u9d; 6n9p; 4z3v; 5p9m; 6di5; 6di1; 6di0; 7n5y; 7n5r; 8e2m; 8ejb; 6e4f; 7kxq; 7n5o; 4zly; 4zlz; 4yhf; 7n5x; 3pix; 7l5p; 6w06; 6x3o; 7l5o; 8flv; 7kxl; 6j6m; 5p9f; 8flh; 7r61; 6x3p; 7kxn; 4ot6; 5bq0; 7kxo; 6bkw; 7ltz; 5p9g; 3gen; 8fll; 6nzm; 5p9h; 6w07; 4rx5; 5vgo; 7yc9; 5kup; 6w8i; 6bln; 6w7o; 4ot5; 6ep9; 5zz4; 6hr…	85	8gmb; 4y93; 8s93; 4xi2; 5j87; 6tfp; 7r60; 7kxm; 6omu; 7kxp; 6nfh; 5p9i; 5vfi; 5p9k; 5u9d; 6n9p; 4z3v; 5p9m; 6di5; 6di1; 6di0; 7n5y; 7n5r; 8e2m; 8ejb; 6e4f; 7kxq; 7n5o; 4zly; 4zlz; 4yhf; 7n5x; 3pix; 7l5p; 6w06; 6x3o; 7l5o; 8flv; 7kxl; 6j6m; 5p9f; 8flh; 7r61; 6x3p; 7kxn; 4ot6; 5bq0; 7kxo; 6bkw; 7ltz; 5p9g; 3gen; 8fll; 6nzm; 5p9h; 6w07; 4rx5; 5vgo; 7yc9; 5kup; 6w8i; 6bln; 6w7o; 4ot5; 6ep9; 5zz4; 6hr…
					4-[8-azanyl-3-[(2~{s})-1-[4-(dimethylamino)butanoyl]pyrrolidin-2-yl]imidazo[1,5-a]pyrazin-1-yl]-~{n}-(1,3-thiazol-2-yl)benzamide	bound	5WE	3.66969	1	6x3o	1	85	8gmb; 4y93; 8s93; 4xi2; 5j87; 6tfp; 7r60; 7kxm; 6omu; 7kxp; 6nfh; 5p9i; 5vfi; 5p9k; 5u9d; 6n9p; 4z3v; 5p9m; 6di5; 6di1; 6di0; 7n5y; 7n5r; 8e2m; 8ejb; 6e4f; 7kxq; 7n5o; 4zly; 4zlz; 4yhf; 7n5x; 3pix; 7l5p; 6w06; 6x3o; 7l5o; 8flv; 7kxl; 6j6m; 5p9f; 8flh; 7r61; 6x3p; 7kxn; 4ot6; 5bq0; 7kxo; 6bkw; 7ltz; 5p9g; 3gen; 8fll; 6nzm; 5p9h; 6w07; 4rx5; 5vgo; 7yc9; 5kup; 6w8i; 6bln; 6w7o; 4ot5; 6ep9; 5zz4; 6hr…	85	8gmb; 4y93; 8s93; 4xi2; 5j87; 6tfp; 7r60; 7kxm; 6omu; 7kxp; 6nfh; 5p9i; 5vfi; 5p9k; 5u9d; 6n9p; 4z3v; 5p9m; 6di5; 6di1; 6di0; 7n5y; 7n5r; 8e2m; 8ejb; 6e4f; 7kxq; 7n5o; 4zly; 4zlz; 4yhf; 7n5x; 3pix; 7l5p; 6w06; 6x3o; 7l5o; 8flv; 7kxl; 6j6m; 5p9f; 8flh; 7r61; 6x3p; 7kxn; 4ot6; 5bq0; 7kxo; 6bkw; 7ltz; 5p9g; 3gen; 8fll; 6nzm; 5p9h; 6w07; 4rx5; 5vgo; 7yc9; 5kup; 6w8i; 6bln; 6w7o; 4ot5; 6ep9; 5zz4; 6hr…
					4-{8-amino-3-[(6r,8as)-3-oxo-3,5,6,7,8,8a-hexahydroindolizin-6-yl]imidazo[1,5-a]pyrazin-1-yl}-3-methoxy-n-[4-(trifluoromethyl)pyridin-2-yl]benzamide	bound	ULY	6.22035	1	6x3o	1	85	8gmb; 4y93; 8s93; 4xi2; 5j87; 6tfp; 7r60; 7kxm; 6omu; 7kxp; 6nfh; 5p9i; 5vfi; 5p9k; 5u9d; 6n9p; 4z3v; 5p9m; 6di5; 6di1; 6di0; 7n5y; 7n5r; 8e2m; 8ejb; 6e4f; 7kxq; 7n5o; 4zly; 4zlz; 4yhf; 7n5x; 3pix; 7l5p; 6w06; 6x3o; 7l5o; 8flv; 7kxl; 6j6m; 5p9f; 8flh; 7r61; 6x3p; 7kxn; 4ot6; 5bq0; 7kxo; 6bkw; 7ltz; 5p9g; 3gen; 8fll; 6nzm; 5p9h; 6w07; 4rx5; 5vgo; 7yc9; 5kup; 6w8i; 6bln; 6w7o; 4ot5; 6ep9; 5zz4; 6hr…	85	8gmb; 4y93; 8s93; 4xi2; 5j87; 6tfp; 7r60; 7kxm; 6omu; 7kxp; 6nfh; 5p9i; 5vfi; 5p9k; 5u9d; 6n9p; 4z3v; 5p9m; 6di5; 6di1; 6di0; 7n5y; 7n5r; 8e2m; 8ejb; 6e4f; 7kxq; 7n5o; 4zly; 4zlz; 4yhf; 7n5x; 3pix; 7l5p; 6w06; 6x3o; 7l5o; 8flv; 7kxl; 6j6m; 5p9f; 8flh; 7r61; 6x3p; 7kxn; 4ot6; 5bq0; 7kxo; 6bkw; 7ltz; 5p9g; 3gen; 8fll; 6nzm; 5p9h; 6w07; 4rx5; 5vgo; 7yc9; 5kup; 6w8i; 6bln; 6w7o; 4ot5; 6ep9; 5zz4; 6hr…
					4-{8-amino-3-[(6r,8as)-3-oxooctahydroindolizin-6-yl]imidazo[1,5-a]pyrazin-1-yl}-3-(cyclopropyloxy)-n-[4-(trifluoromethyl)pyridin-2-yl]benzamide	bound	UM4	3.1893	1	6x3p	1	85	8gmb; 4y93; 8s93; 4xi2; 5j87; 6tfp; 7r60; 7kxm; 6omu; 7kxp; 6nfh; 5p9i; 5vfi; 5p9k; 5u9d; 6n9p; 4z3v; 5p9m; 6di5; 6di1; 6di0; 7n5y; 7n5r; 8e2m; 8ejb; 6e4f; 7kxq; 7n5o; 4zly; 4zlz; 4yhf; 7n5x; 3pix; 7l5p; 6w06; 6x3o; 7l5o; 8flv; 7kxl; 6j6m; 5p9f; 8flh; 7r61; 6x3p; 7kxn; 4ot6; 5bq0; 7kxo; 6bkw; 7ltz; 5p9g; 3gen; 8fll; 6nzm; 5p9h; 6w07; 4rx5; 5vgo; 7yc9; 5kup; 6w8i; 6bln; 6w7o; 4ot5; 6ep9; 5zz4; 6hr…	85	8gmb; 4y93; 8s93; 4xi2; 5j87; 6tfp; 7r60; 7kxm; 6omu; 7kxp; 6nfh; 5p9i; 5vfi; 5p9k; 5u9d; 6n9p; 4z3v; 5p9m; 6di5; 6di1; 6di0; 7n5y; 7n5r; 8e2m; 8ejb; 6e4f; 7kxq; 7n5o; 4zly; 4zlz; 4yhf; 7n5x; 3pix; 7l5p; 6w06; 6x3o; 7l5o; 8flv; 7kxl; 6j6m; 5p9f; 8flh; 7r61; 6x3p; 7kxn; 4ot6; 5bq0; 7kxo; 6bkw; 7ltz; 5p9g; 3gen; 8fll; 6nzm; 5p9h; 6w07; 4rx5; 5vgo; 7yc9; 5kup; 6w8i; 6bln; 6w7o; 4ot5; 6ep9; 5zz4; 6hr…
					4-~{tert}-butyl-~{n}-[2-methyl-3-[6-[4-(4-methylpiperazin-1-yl)carbonylphenyl]-7~{h}-pyrrolo[2,3-d]pyrimidin-4-yl]phenyl]benzamide	bound	L0Z	6.28436	1	6s90	1	85	8gmb; 4y93; 8s93; 4xi2; 5j87; 6tfp; 7r60; 7kxm; 6omu; 7kxp; 6nfh; 5p9i; 5vfi; 5p9k; 5u9d; 6n9p; 4z3v; 5p9m; 6di5; 6di1; 6di0; 7n5y; 7n5r; 8e2m; 8ejb; 6e4f; 7kxq; 7n5o; 4zly; 4zlz; 4yhf; 7n5x; 3pix; 7l5p; 6w06; 6x3o; 7l5o; 8flv; 7kxl; 6j6m; 5p9f; 8flh; 7r61; 6x3p; 7kxn; 4ot6; 5bq0; 7kxo; 6bkw; 7ltz; 5p9g; 3gen; 8fll; 6nzm; 5p9h; 6w07; 4rx5; 5vgo; 7yc9; 5kup; 6w8i; 6bln; 6w7o; 4ot5; 6ep9; 5zz4; 6hr…	85	8gmb; 4y93; 8s93; 4xi2; 5j87; 6tfp; 7r60; 7kxm; 6omu; 7kxp; 6nfh; 5p9i; 5vfi; 5p9k; 5u9d; 6n9p; 4z3v; 5p9m; 6di5; 6di1; 6di0; 7n5y; 7n5r; 8e2m; 8ejb; 6e4f; 7kxq; 7n5o; 4zly; 4zlz; 4yhf; 7n5x; 3pix; 7l5p; 6w06; 6x3o; 7l5o; 8flv; 7kxl; 6j6m; 5p9f; 8flh; 7r61; 6x3p; 7kxn; 4ot6; 5bq0; 7kxo; 6bkw; 7ltz; 5p9g; 3gen; 8fll; 6nzm; 5p9h; 6w07; 4rx5; 5vgo; 7yc9; 5kup; 6w8i; 6bln; 6w7o; 4ot5; 6ep9; 5zz4; 6hr…
					6-{(3r)-3-[(4-tert-butylbenzoyl)amino]piperidin-1-yl}-2-{[4-(morpholin-4-ylcarbonyl)phenyl]amino}pyridine-3-carboxamide	bound	4UQ	5.69075	1	5bpy	1	85	8gmb; 4y93; 8s93; 4xi2; 5j87; 6tfp; 7r60; 7kxm; 6omu; 7kxp; 6nfh; 5p9i; 5vfi; 5p9k; 5u9d; 6n9p; 4z3v; 5p9m; 6di5; 6di1; 6di0; 7n5y; 7n5r; 8e2m; 8ejb; 6e4f; 7kxq; 7n5o; 4zly; 4zlz; 4yhf; 7n5x; 3pix; 7l5p; 6w06; 6x3o; 7l5o; 8flv; 7kxl; 6j6m; 5p9f; 8flh; 7r61; 6x3p; 7kxn; 4ot6; 5bq0; 7kxo; 6bkw; 7ltz; 5p9g; 3gen; 8fll; 6nzm; 5p9h; 6w07; 4rx5; 5vgo; 7yc9; 5kup; 6w8i; 6bln; 6w7o; 4ot5; 6ep9; 5zz4; 6hr…	85	8gmb; 4y93; 8s93; 4xi2; 5j87; 6tfp; 7r60; 7kxm; 6omu; 7kxp; 6nfh; 5p9i; 5vfi; 5p9k; 5u9d; 6n9p; 4z3v; 5p9m; 6di5; 6di1; 6di0; 7n5y; 7n5r; 8e2m; 8ejb; 6e4f; 7kxq; 7n5o; 4zly; 4zlz; 4yhf; 7n5x; 3pix; 7l5p; 6w06; 6x3o; 7l5o; 8flv; 7kxl; 6j6m; 5p9f; 8flh; 7r61; 6x3p; 7kxn; 4ot6; 5bq0; 7kxo; 6bkw; 7ltz; 5p9g; 3gen; 8fll; 6nzm; 5p9h; 6w07; 4rx5; 5vgo; 7yc9; 5kup; 6w8i; 6bln; 6w7o; 4ot5; 6ep9; 5zz4; 6hr…
					[5-({[(3s)-2-(n-methyl-l-alanyl-3-methyl-l-valyl)-3-{[(1r)-1,2,3,4-tetrahydronaphthalen-1-yl]carbamoyl}-1,2,3,4-tetrahydroisoquinolin-7-yl]oxy}methyl)pyrazin-2-yl]methyl (3r)-3-{5-amino-4-carbamoyl-3-[4-(2,4-difluorophenoxy)phenyl]-1h-pyrazol-1-yl}piperidine-1-carboxylate	bound	TL7	5.9752	1	6w7o	1	85	8gmb; 4y93; 8s93; 4xi2; 5j87; 6tfp; 7r60; 7kxm; 6omu; 7kxp; 6nfh; 5p9i; 5vfi; 5p9k; 5u9d; 6n9p; 4z3v; 5p9m; 6di5; 6di1; 6di0; 7n5y; 7n5r; 8e2m; 8ejb; 6e4f; 7kxq; 7n5o; 4zly; 4zlz; 4yhf; 7n5x; 3pix; 7l5p; 6w06; 6x3o; 7l5o; 8flv; 7kxl; 6j6m; 5p9f; 8flh; 7r61; 6x3p; 7kxn; 4ot6; 5bq0; 7kxo; 6bkw; 7ltz; 5p9g; 3gen; 8fll; 6nzm; 5p9h; 6w07; 4rx5; 5vgo; 7yc9; 5kup; 6w8i; 6bln; 6w7o; 4ot5; 6ep9; 5zz4; 6hr…	85	8gmb; 4y93; 8s93; 4xi2; 5j87; 6tfp; 7r60; 7kxm; 6omu; 7kxp; 6nfh; 5p9i; 5vfi; 5p9k; 5u9d; 6n9p; 4z3v; 5p9m; 6di5; 6di1; 6di0; 7n5y; 7n5r; 8e2m; 8ejb; 6e4f; 7kxq; 7n5o; 4zly; 4zlz; 4yhf; 7n5x; 3pix; 7l5p; 6w06; 6x3o; 7l5o; 8flv; 7kxl; 6j6m; 5p9f; 8flh; 7r61; 6x3p; 7kxn; 4ot6; 5bq0; 7kxo; 6bkw; 7ltz; 5p9g; 3gen; 8fll; 6nzm; 5p9h; 6w07; 4rx5; 5vgo; 7yc9; 5kup; 6w8i; 6bln; 6w7o; 4ot5; 6ep9; 5zz4; 6hr…
					n-[2-fluoro-6-(pyrrolidin-1-yl)phenyl]-n'-{3-[(2r)-1-(2-hydroxyethyl)-4-(7h-pyrrolo[2,3-d]pyrimidin-4-yl)piperazin-2-yl]phenyl}urea	bound	L9S	6.2181	1	6nzm	1	85	8gmb; 4y93; 8s93; 4xi2; 5j87; 6tfp; 7r60; 7kxm; 6omu; 7kxp; 6nfh; 5p9i; 5vfi; 5p9k; 5u9d; 6n9p; 4z3v; 5p9m; 6di5; 6di1; 6di0; 7n5y; 7n5r; 8e2m; 8ejb; 6e4f; 7kxq; 7n5o; 4zly; 4zlz; 4yhf; 7n5x; 3pix; 7l5p; 6w06; 6x3o; 7l5o; 8flv; 7kxl; 6j6m; 5p9f; 8flh; 7r61; 6x3p; 7kxn; 4ot6; 5bq0; 7kxo; 6bkw; 7ltz; 5p9g; 3gen; 8fll; 6nzm; 5p9h; 6w07; 4rx5; 5vgo; 7yc9; 5kup; 6w8i; 6bln; 6w7o; 4ot5; 6ep9; 5zz4; 6hr…	85	8gmb; 4y93; 8s93; 4xi2; 5j87; 6tfp; 7r60; 7kxm; 6omu; 7kxp; 6nfh; 5p9i; 5vfi; 5p9k; 5u9d; 6n9p; 4z3v; 5p9m; 6di5; 6di1; 6di0; 7n5y; 7n5r; 8e2m; 8ejb; 6e4f; 7kxq; 7n5o; 4zly; 4zlz; 4yhf; 7n5x; 3pix; 7l5p; 6w06; 6x3o; 7l5o; 8flv; 7kxl; 6j6m; 5p9f; 8flh; 7r61; 6x3p; 7kxn; 4ot6; 5bq0; 7kxo; 6bkw; 7ltz; 5p9g; 3gen; 8fll; 6nzm; 5p9h; 6w07; 4rx5; 5vgo; 7yc9; 5kup; 6w8i; 6bln; 6w7o; 4ot5; 6ep9; 5zz4; 6hr…
					(1s,2s)-n-[2'-(6-tert-butyl-8-fluoro-1-oxophthalazin-2(1h)-yl)-3'-(hydroxymethyl)-1-methyl-6-oxo[1,6-dihydro[3,4'-bipyridine]]-5-yl]-2-fluorocyclopropane-1-carboxamide	bound	V1G	6.2486	1	6xe4	1	85	8gmb; 4y93; 8s93; 4xi2; 5j87; 6tfp; 7r60; 7kxm; 6omu; 7kxp; 6nfh; 5p9i; 5vfi; 5p9k; 5u9d; 6n9p; 4z3v; 5p9m; 6di5; 6di1; 6di0; 7n5y; 7n5r; 8e2m; 8ejb; 6e4f; 7kxq; 7n5o; 4zly; 4zlz; 4yhf; 7n5x; 3pix; 7l5p; 6w06; 6x3o; 7l5o; 8flv; 7kxl; 6j6m; 5p9f; 8flh; 7r61; 6x3p; 7kxn; 4ot6; 5bq0; 7kxo; 6bkw; 7ltz; 5p9g; 3gen; 8fll; 6nzm; 5p9h; 6w07; 4rx5; 5vgo; 7yc9; 5kup; 6w8i; 6bln; 6w7o; 4ot5; 6ep9; 5zz4; 6hr…	85	8gmb; 4y93; 8s93; 4xi2; 5j87; 6tfp; 7r60; 7kxm; 6omu; 7kxp; 6nfh; 5p9i; 5vfi; 5p9k; 5u9d; 6n9p; 4z3v; 5p9m; 6di5; 6di1; 6di0; 7n5y; 7n5r; 8e2m; 8ejb; 6e4f; 7kxq; 7n5o; 4zly; 4zlz; 4yhf; 7n5x; 3pix; 7l5p; 6w06; 6x3o; 7l5o; 8flv; 7kxl; 6j6m; 5p9f; 8flh; 7r61; 6x3p; 7kxn; 4ot6; 5bq0; 7kxo; 6bkw; 7ltz; 5p9g; 3gen; 8fll; 6nzm; 5p9h; 6w07; 4rx5; 5vgo; 7yc9; 5kup; 6w8i; 6bln; 6w7o; 4ot5; 6ep9; 5zz4; 6hr…
					(5p)-5-[4-methyl-6-(2-methylpropyl)pyridin-3-yl]-4-oxo-n-[(1r,2s)-2-propanamidocyclopentyl]-4,5-dihydro-3h-1-thia-3,5,8-triazaacenaphthylene-2-carboxamide	bound	UB6	5.88302	1	8e2m	1	85	8gmb; 4y93; 8s93; 4xi2; 5j87; 6tfp; 7r60; 7kxm; 6omu; 7kxp; 6nfh; 5p9i; 5vfi; 5p9k; 5u9d; 6n9p; 4z3v; 5p9m; 6di5; 6di1; 6di0; 7n5y; 7n5r; 8e2m; 8ejb; 6e4f; 7kxq; 7n5o; 4zly; 4zlz; 4yhf; 7n5x; 3pix; 7l5p; 6w06; 6x3o; 7l5o; 8flv; 7kxl; 6j6m; 5p9f; 8flh; 7r61; 6x3p; 7kxn; 4ot6; 5bq0; 7kxo; 6bkw; 7ltz; 5p9g; 3gen; 8fll; 6nzm; 5p9h; 6w07; 4rx5; 5vgo; 7yc9; 5kup; 6w8i; 6bln; 6w7o; 4ot5; 6ep9; 5zz4; 6hr…	85	8gmb; 4y93; 8s93; 4xi2; 5j87; 6tfp; 7r60; 7kxm; 6omu; 7kxp; 6nfh; 5p9i; 5vfi; 5p9k; 5u9d; 6n9p; 4z3v; 5p9m; 6di5; 6di1; 6di0; 7n5y; 7n5r; 8e2m; 8ejb; 6e4f; 7kxq; 7n5o; 4zly; 4zlz; 4yhf; 7n5x; 3pix; 7l5p; 6w06; 6x3o; 7l5o; 8flv; 7kxl; 6j6m; 5p9f; 8flh; 7r61; 6x3p; 7kxn; 4ot6; 5bq0; 7kxo; 6bkw; 7ltz; 5p9g; 3gen; 8fll; 6nzm; 5p9h; 6w07; 4rx5; 5vgo; 7yc9; 5kup; 6w8i; 6bln; 6w7o; 4ot5; 6ep9; 5zz4; 6hr…
					(7s)-2-(4-phenoxyphenyl)-7-(1-propanoylpiperidin-4-yl)-4,5,6,7-tetrahydropyrazolo[1,5-a]pyrimidine-3-carboxamide	bound	BA0	6.21248	1	6j6m	1	85	8gmb; 4y93; 8s93; 4xi2; 5j87; 6tfp; 7r60; 7kxm; 6omu; 7kxp; 6nfh; 5p9i; 5vfi; 5p9k; 5u9d; 6n9p; 4z3v; 5p9m; 6di5; 6di1; 6di0; 7n5y; 7n5r; 8e2m; 8ejb; 6e4f; 7kxq; 7n5o; 4zly; 4zlz; 4yhf; 7n5x; 3pix; 7l5p; 6w06; 6x3o; 7l5o; 8flv; 7kxl; 6j6m; 5p9f; 8flh; 7r61; 6x3p; 7kxn; 4ot6; 5bq0; 7kxo; 6bkw; 7ltz; 5p9g; 3gen; 8fll; 6nzm; 5p9h; 6w07; 4rx5; 5vgo; 7yc9; 5kup; 6w8i; 6bln; 6w7o; 4ot5; 6ep9; 5zz4; 6hr…	85	8gmb; 4y93; 8s93; 4xi2; 5j87; 6tfp; 7r60; 7kxm; 6omu; 7kxp; 6nfh; 5p9i; 5vfi; 5p9k; 5u9d; 6n9p; 4z3v; 5p9m; 6di5; 6di1; 6di0; 7n5y; 7n5r; 8e2m; 8ejb; 6e4f; 7kxq; 7n5o; 4zly; 4zlz; 4yhf; 7n5x; 3pix; 7l5p; 6w06; 6x3o; 7l5o; 8flv; 7kxl; 6j6m; 5p9f; 8flh; 7r61; 6x3p; 7kxn; 4ot6; 5bq0; 7kxo; 6bkw; 7ltz; 5p9g; 3gen; 8fll; 6nzm; 5p9h; 6w07; 4rx5; 5vgo; 7yc9; 5kup; 6w8i; 6bln; 6w7o; 4ot5; 6ep9; 5zz4; 6hr…
					(7~{s})-2-(4-bromanyl-3,5-dimethoxy-phenyl)-7-(1-propanoylpiperidin-4-yl)-4,5,6,7-tetrahydropyrazolo[1,5-a]pyrimidine-3-carboxamide	bound	IS4	6.07297	1	7yc9	1	85	8gmb; 4y93; 8s93; 4xi2; 5j87; 6tfp; 7r60; 7kxm; 6omu; 7kxp; 6nfh; 5p9i; 5vfi; 5p9k; 5u9d; 6n9p; 4z3v; 5p9m; 6di5; 6di1; 6di0; 7n5y; 7n5r; 8e2m; 8ejb; 6e4f; 7kxq; 7n5o; 4zly; 4zlz; 4yhf; 7n5x; 3pix; 7l5p; 6w06; 6x3o; 7l5o; 8flv; 7kxl; 6j6m; 5p9f; 8flh; 7r61; 6x3p; 7kxn; 4ot6; 5bq0; 7kxo; 6bkw; 7ltz; 5p9g; 3gen; 8fll; 6nzm; 5p9h; 6w07; 4rx5; 5vgo; 7yc9; 5kup; 6w8i; 6bln; 6w7o; 4ot5; 6ep9; 5zz4; 6hr…	85	8gmb; 4y93; 8s93; 4xi2; 5j87; 6tfp; 7r60; 7kxm; 6omu; 7kxp; 6nfh; 5p9i; 5vfi; 5p9k; 5u9d; 6n9p; 4z3v; 5p9m; 6di5; 6di1; 6di0; 7n5y; 7n5r; 8e2m; 8ejb; 6e4f; 7kxq; 7n5o; 4zly; 4zlz; 4yhf; 7n5x; 3pix; 7l5p; 6w06; 6x3o; 7l5o; 8flv; 7kxl; 6j6m; 5p9f; 8flh; 7r61; 6x3p; 7kxn; 4ot6; 5bq0; 7kxo; 6bkw; 7ltz; 5p9g; 3gen; 8fll; 6nzm; 5p9h; 6w07; 4rx5; 5vgo; 7yc9; 5kup; 6w8i; 6bln; 6w7o; 4ot5; 6ep9; 5zz4; 6hr…
					(9~{s})-12-(6-~{tert}-butyl-8-fluoranyl-1-oxidanylidene-phthalazin-2-yl)-6-methyl-4-[(5-morpholin-4-ylcarbonylpyridin-2-yl)amino]-9-oxidanyl-6-azatricyclo[9.4.0.0^{2,7}]pentadeca-1(15),2(7),3,11,13-pentaen-5-one	bound	GMW	6.21854	1	6hrt	1	85	8gmb; 4y93; 8s93; 4xi2; 5j87; 6tfp; 7r60; 7kxm; 6omu; 7kxp; 6nfh; 5p9i; 5vfi; 5p9k; 5u9d; 6n9p; 4z3v; 5p9m; 6di5; 6di1; 6di0; 7n5y; 7n5r; 8e2m; 8ejb; 6e4f; 7kxq; 7n5o; 4zly; 4zlz; 4yhf; 7n5x; 3pix; 7l5p; 6w06; 6x3o; 7l5o; 8flv; 7kxl; 6j6m; 5p9f; 8flh; 7r61; 6x3p; 7kxn; 4ot6; 5bq0; 7kxo; 6bkw; 7ltz; 5p9g; 3gen; 8fll; 6nzm; 5p9h; 6w07; 4rx5; 5vgo; 7yc9; 5kup; 6w8i; 6bln; 6w7o; 4ot5; 6ep9; 5zz4; 6hr…	85	8gmb; 4y93; 8s93; 4xi2; 5j87; 6tfp; 7r60; 7kxm; 6omu; 7kxp; 6nfh; 5p9i; 5vfi; 5p9k; 5u9d; 6n9p; 4z3v; 5p9m; 6di5; 6di1; 6di0; 7n5y; 7n5r; 8e2m; 8ejb; 6e4f; 7kxq; 7n5o; 4zly; 4zlz; 4yhf; 7n5x; 3pix; 7l5p; 6w06; 6x3o; 7l5o; 8flv; 7kxl; 6j6m; 5p9f; 8flh; 7r61; 6x3p; 7kxn; 4ot6; 5bq0; 7kxo; 6bkw; 7ltz; 5p9g; 3gen; 8fll; 6nzm; 5p9h; 6w07; 4rx5; 5vgo; 7yc9; 5kup; 6w8i; 6bln; 6w7o; 4ot5; 6ep9; 5zz4; 6hr…
					(r)-n-methyl-2-(3-((quinoxalin-6-ylamino)methyl)furan-2-carbonyl)-2,3,4,9-tetrahydro-1h-pyrido[3,4-b]indole-3-carboxamide	bound	83P	6.21966	1	5u9d	1	85	8gmb; 4y93; 8s93; 4xi2; 5j87; 6tfp; 7r60; 7kxm; 6omu; 7kxp; 6nfh; 5p9i; 5vfi; 5p9k; 5u9d; 6n9p; 4z3v; 5p9m; 6di5; 6di1; 6di0; 7n5y; 7n5r; 8e2m; 8ejb; 6e4f; 7kxq; 7n5o; 4zly; 4zlz; 4yhf; 7n5x; 3pix; 7l5p; 6w06; 6x3o; 7l5o; 8flv; 7kxl; 6j6m; 5p9f; 8flh; 7r61; 6x3p; 7kxn; 4ot6; 5bq0; 7kxo; 6bkw; 7ltz; 5p9g; 3gen; 8fll; 6nzm; 5p9h; 6w07; 4rx5; 5vgo; 7yc9; 5kup; 6w8i; 6bln; 6w7o; 4ot5; 6ep9; 5zz4; 6hr…	85	8gmb; 4y93; 8s93; 4xi2; 5j87; 6tfp; 7r60; 7kxm; 6omu; 7kxp; 6nfh; 5p9i; 5vfi; 5p9k; 5u9d; 6n9p; 4z3v; 5p9m; 6di5; 6di1; 6di0; 7n5y; 7n5r; 8e2m; 8ejb; 6e4f; 7kxq; 7n5o; 4zly; 4zlz; 4yhf; 7n5x; 3pix; 7l5p; 6w06; 6x3o; 7l5o; 8flv; 7kxl; 6j6m; 5p9f; 8flh; 7r61; 6x3p; 7kxn; 4ot6; 5bq0; 7kxo; 6bkw; 7ltz; 5p9g; 3gen; 8fll; 6nzm; 5p9h; 6w07; 4rx5; 5vgo; 7yc9; 5kup; 6w8i; 6bln; 6w7o; 4ot5; 6ep9; 5zz4; 6hr…
					1,5-anhydro-2-{[5-(2-chloro-4-phenoxybenzene-1-carbonyl)-7h-pyrrolo[2,3-d]pyrimidin-4-yl]amino}-2,3,4-trideoxy-d-erythro-hexitol	bound	HRA	6.26487	1	6e4f	1	85	8gmb; 4y93; 8s93; 4xi2; 5j87; 6tfp; 7r60; 7kxm; 6omu; 7kxp; 6nfh; 5p9i; 5vfi; 5p9k; 5u9d; 6n9p; 4z3v; 5p9m; 6di5; 6di1; 6di0; 7n5y; 7n5r; 8e2m; 8ejb; 6e4f; 7kxq; 7n5o; 4zly; 4zlz; 4yhf; 7n5x; 3pix; 7l5p; 6w06; 6x3o; 7l5o; 8flv; 7kxl; 6j6m; 5p9f; 8flh; 7r61; 6x3p; 7kxn; 4ot6; 5bq0; 7kxo; 6bkw; 7ltz; 5p9g; 3gen; 8fll; 6nzm; 5p9h; 6w07; 4rx5; 5vgo; 7yc9; 5kup; 6w8i; 6bln; 6w7o; 4ot5; 6ep9; 5zz4; 6hr…	85	8gmb; 4y93; 8s93; 4xi2; 5j87; 6tfp; 7r60; 7kxm; 6omu; 7kxp; 6nfh; 5p9i; 5vfi; 5p9k; 5u9d; 6n9p; 4z3v; 5p9m; 6di5; 6di1; 6di0; 7n5y; 7n5r; 8e2m; 8ejb; 6e4f; 7kxq; 7n5o; 4zly; 4zlz; 4yhf; 7n5x; 3pix; 7l5p; 6w06; 6x3o; 7l5o; 8flv; 7kxl; 6j6m; 5p9f; 8flh; 7r61; 6x3p; 7kxn; 4ot6; 5bq0; 7kxo; 6bkw; 7ltz; 5p9g; 3gen; 8fll; 6nzm; 5p9h; 6w07; 4rx5; 5vgo; 7yc9; 5kup; 6w8i; 6bln; 6w7o; 4ot5; 6ep9; 5zz4; 6hr…
					1-[(3~{r})-3-[4-azanyl-3-(4-phenoxyphenyl)pyrazolo[3,4-d]pyrimidin-1-yl]piperidin-1-yl]propan-1-one	bound	8E8	6.2993	1	5p9j	1	85	8gmb; 4y93; 8s93; 4xi2; 5j87; 6tfp; 7r60; 7kxm; 6omu; 7kxp; 6nfh; 5p9i; 5vfi; 5p9k; 5u9d; 6n9p; 4z3v; 5p9m; 6di5; 6di1; 6di0; 7n5y; 7n5r; 8e2m; 8ejb; 6e4f; 7kxq; 7n5o; 4zly; 4zlz; 4yhf; 7n5x; 3pix; 7l5p; 6w06; 6x3o; 7l5o; 8flv; 7kxl; 6j6m; 5p9f; 8flh; 7r61; 6x3p; 7kxn; 4ot6; 5bq0; 7kxo; 6bkw; 7ltz; 5p9g; 3gen; 8fll; 6nzm; 5p9h; 6w07; 4rx5; 5vgo; 7yc9; 5kup; 6w8i; 6bln; 6w7o; 4ot5; 6ep9; 5zz4; 6hr…	85	8gmb; 4y93; 8s93; 4xi2; 5j87; 6tfp; 7r60; 7kxm; 6omu; 7kxp; 6nfh; 5p9i; 5vfi; 5p9k; 5u9d; 6n9p; 4z3v; 5p9m; 6di5; 6di1; 6di0; 7n5y; 7n5r; 8e2m; 8ejb; 6e4f; 7kxq; 7n5o; 4zly; 4zlz; 4yhf; 7n5x; 3pix; 7l5p; 6w06; 6x3o; 7l5o; 8flv; 7kxl; 6j6m; 5p9f; 8flh; 7r61; 6x3p; 7kxn; 4ot6; 5bq0; 7kxo; 6bkw; 7ltz; 5p9g; 3gen; 8fll; 6nzm; 5p9h; 6w07; 4rx5; 5vgo; 7yc9; 5kup; 6w8i; 6bln; 6w7o; 4ot5; 6ep9; 5zz4; 6hr…
					1-[4-({[6-amino-5-(4-phenoxyphenyl)pyrimidin-4-yl]amino}methyl)piperidin-1-yl]prop-2-en-1-one	bound	MZJ	6.31265	1	6omu	1	85	8gmb; 4y93; 8s93; 4xi2; 5j87; 6tfp; 7r60; 7kxm; 6omu; 7kxp; 6nfh; 5p9i; 5vfi; 5p9k; 5u9d; 6n9p; 4z3v; 5p9m; 6di5; 6di1; 6di0; 7n5y; 7n5r; 8e2m; 8ejb; 6e4f; 7kxq; 7n5o; 4zly; 4zlz; 4yhf; 7n5x; 3pix; 7l5p; 6w06; 6x3o; 7l5o; 8flv; 7kxl; 6j6m; 5p9f; 8flh; 7r61; 6x3p; 7kxn; 4ot6; 5bq0; 7kxo; 6bkw; 7ltz; 5p9g; 3gen; 8fll; 6nzm; 5p9h; 6w07; 4rx5; 5vgo; 7yc9; 5kup; 6w8i; 6bln; 6w7o; 4ot5; 6ep9; 5zz4; 6hr…	85	8gmb; 4y93; 8s93; 4xi2; 5j87; 6tfp; 7r60; 7kxm; 6omu; 7kxp; 6nfh; 5p9i; 5vfi; 5p9k; 5u9d; 6n9p; 4z3v; 5p9m; 6di5; 6di1; 6di0; 7n5y; 7n5r; 8e2m; 8ejb; 6e4f; 7kxq; 7n5o; 4zly; 4zlz; 4yhf; 7n5x; 3pix; 7l5p; 6w06; 6x3o; 7l5o; 8flv; 7kxl; 6j6m; 5p9f; 8flh; 7r61; 6x3p; 7kxn; 4ot6; 5bq0; 7kxo; 6bkw; 7ltz; 5p9g; 3gen; 8fll; 6nzm; 5p9h; 6w07; 4rx5; 5vgo; 7yc9; 5kup; 6w8i; 6bln; 6w7o; 4ot5; 6ep9; 5zz4; 6hr…
					1-{(3r)-3-[4-amino-3-(4-phenoxyphenyl)-1h-pyrazolo[3,4-d]pyrimidin-1-yl]piperidin-1-yl}prop-2-en-1-one	bound	1E8	6.20392	1	5p9i	1	85	8gmb; 4y93; 8s93; 4xi2; 5j87; 6tfp; 7r60; 7kxm; 6omu; 7kxp; 6nfh; 5p9i; 5vfi; 5p9k; 5u9d; 6n9p; 4z3v; 5p9m; 6di5; 6di1; 6di0; 7n5y; 7n5r; 8e2m; 8ejb; 6e4f; 7kxq; 7n5o; 4zly; 4zlz; 4yhf; 7n5x; 3pix; 7l5p; 6w06; 6x3o; 7l5o; 8flv; 7kxl; 6j6m; 5p9f; 8flh; 7r61; 6x3p; 7kxn; 4ot6; 5bq0; 7kxo; 6bkw; 7ltz; 5p9g; 3gen; 8fll; 6nzm; 5p9h; 6w07; 4rx5; 5vgo; 7yc9; 5kup; 6w8i; 6bln; 6w7o; 4ot5; 6ep9; 5zz4; 6hr…	85	8gmb; 4y93; 8s93; 4xi2; 5j87; 6tfp; 7r60; 7kxm; 6omu; 7kxp; 6nfh; 5p9i; 5vfi; 5p9k; 5u9d; 6n9p; 4z3v; 5p9m; 6di5; 6di1; 6di0; 7n5y; 7n5r; 8e2m; 8ejb; 6e4f; 7kxq; 7n5o; 4zly; 4zlz; 4yhf; 7n5x; 3pix; 7l5p; 6w06; 6x3o; 7l5o; 8flv; 7kxl; 6j6m; 5p9f; 8flh; 7r61; 6x3p; 7kxn; 4ot6; 5bq0; 7kxo; 6bkw; 7ltz; 5p9g; 3gen; 8fll; 6nzm; 5p9h; 6w07; 4rx5; 5vgo; 7yc9; 5kup; 6w8i; 6bln; 6w7o; 4ot5; 6ep9; 5zz4; 6hr…
					1-{5-[3-(7-tert-butyl-4-oxoquinazolin-3(4h)-yl)-2-methylphenyl]-1-methyl-2-oxo-1,2-dihydropyridin-3-yl}-3-methylurea	bound	2V2	6.29979	1	4otq	1	85	8gmb; 4y93; 8s93; 4xi2; 5j87; 6tfp; 7r60; 7kxm; 6omu; 7kxp; 6nfh; 5p9i; 5vfi; 5p9k; 5u9d; 6n9p; 4z3v; 5p9m; 6di5; 6di1; 6di0; 7n5y; 7n5r; 8e2m; 8ejb; 6e4f; 7kxq; 7n5o; 4zly; 4zlz; 4yhf; 7n5x; 3pix; 7l5p; 6w06; 6x3o; 7l5o; 8flv; 7kxl; 6j6m; 5p9f; 8flh; 7r61; 6x3p; 7kxn; 4ot6; 5bq0; 7kxo; 6bkw; 7ltz; 5p9g; 3gen; 8fll; 6nzm; 5p9h; 6w07; 4rx5; 5vgo; 7yc9; 5kup; 6w8i; 6bln; 6w7o; 4ot5; 6ep9; 5zz4; 6hr…	85	8gmb; 4y93; 8s93; 4xi2; 5j87; 6tfp; 7r60; 7kxm; 6omu; 7kxp; 6nfh; 5p9i; 5vfi; 5p9k; 5u9d; 6n9p; 4z3v; 5p9m; 6di5; 6di1; 6di0; 7n5y; 7n5r; 8e2m; 8ejb; 6e4f; 7kxq; 7n5o; 4zly; 4zlz; 4yhf; 7n5x; 3pix; 7l5p; 6w06; 6x3o; 7l5o; 8flv; 7kxl; 6j6m; 5p9f; 8flh; 7r61; 6x3p; 7kxn; 4ot6; 5bq0; 7kxo; 6bkw; 7ltz; 5p9g; 3gen; 8fll; 6nzm; 5p9h; 6w07; 4rx5; 5vgo; 7yc9; 5kup; 6w8i; 6bln; 6w7o; 4ot5; 6ep9; 5zz4; 6hr…
					1-~{tert}-butyl-~{n}-[(5~{r})-8-[2-[(1-methylpyrazol-4-yl)amino]pyrimidin-4-yl]-2-(oxetan-3-yl)-1,3,4,5-tetrahydro-2-benzazepin-5-yl]-1,2,3-triazole-4-carboxamide	bound	YDA	6.26966	1	7ltz	1	85	8gmb; 4y93; 8s93; 4xi2; 5j87; 6tfp; 7r60; 7kxm; 6omu; 7kxp; 6nfh; 5p9i; 5vfi; 5p9k; 5u9d; 6n9p; 4z3v; 5p9m; 6di5; 6di1; 6di0; 7n5y; 7n5r; 8e2m; 8ejb; 6e4f; 7kxq; 7n5o; 4zly; 4zlz; 4yhf; 7n5x; 3pix; 7l5p; 6w06; 6x3o; 7l5o; 8flv; 7kxl; 6j6m; 5p9f; 8flh; 7r61; 6x3p; 7kxn; 4ot6; 5bq0; 7kxo; 6bkw; 7ltz; 5p9g; 3gen; 8fll; 6nzm; 5p9h; 6w07; 4rx5; 5vgo; 7yc9; 5kup; 6w8i; 6bln; 6w7o; 4ot5; 6ep9; 5zz4; 6hr…	85	8gmb; 4y93; 8s93; 4xi2; 5j87; 6tfp; 7r60; 7kxm; 6omu; 7kxp; 6nfh; 5p9i; 5vfi; 5p9k; 5u9d; 6n9p; 4z3v; 5p9m; 6di5; 6di1; 6di0; 7n5y; 7n5r; 8e2m; 8ejb; 6e4f; 7kxq; 7n5o; 4zly; 4zlz; 4yhf; 7n5x; 3pix; 7l5p; 6w06; 6x3o; 7l5o; 8flv; 7kxl; 6j6m; 5p9f; 8flh; 7r61; 6x3p; 7kxn; 4ot6; 5bq0; 7kxo; 6bkw; 7ltz; 5p9g; 3gen; 8fll; 6nzm; 5p9h; 6w07; 4rx5; 5vgo; 7yc9; 5kup; 6w8i; 6bln; 6w7o; 4ot5; 6ep9; 5zz4; 6hr…
					2-(3,5-dichloroanilino)-1-{(3r)-3-[methyl(7h-pyrrolo[2,3-d]pyrimidin-4-yl)amino]azepan-1-yl}ethan-1-one	bound	Y8H	6.26899	1	8flh	1	85	8gmb; 4y93; 8s93; 4xi2; 5j87; 6tfp; 7r60; 7kxm; 6omu; 7kxp; 6nfh; 5p9i; 5vfi; 5p9k; 5u9d; 6n9p; 4z3v; 5p9m; 6di5; 6di1; 6di0; 7n5y; 7n5r; 8e2m; 8ejb; 6e4f; 7kxq; 7n5o; 4zly; 4zlz; 4yhf; 7n5x; 3pix; 7l5p; 6w06; 6x3o; 7l5o; 8flv; 7kxl; 6j6m; 5p9f; 8flh; 7r61; 6x3p; 7kxn; 4ot6; 5bq0; 7kxo; 6bkw; 7ltz; 5p9g; 3gen; 8fll; 6nzm; 5p9h; 6w07; 4rx5; 5vgo; 7yc9; 5kup; 6w8i; 6bln; 6w7o; 4ot5; 6ep9; 5zz4; 6hr…	85	8gmb; 4y93; 8s93; 4xi2; 5j87; 6tfp; 7r60; 7kxm; 6omu; 7kxp; 6nfh; 5p9i; 5vfi; 5p9k; 5u9d; 6n9p; 4z3v; 5p9m; 6di5; 6di1; 6di0; 7n5y; 7n5r; 8e2m; 8ejb; 6e4f; 7kxq; 7n5o; 4zly; 4zlz; 4yhf; 7n5x; 3pix; 7l5p; 6w06; 6x3o; 7l5o; 8flv; 7kxl; 6j6m; 5p9f; 8flh; 7r61; 6x3p; 7kxn; 4ot6; 5bq0; 7kxo; 6bkw; 7ltz; 5p9g; 3gen; 8fll; 6nzm; 5p9h; 6w07; 4rx5; 5vgo; 7yc9; 5kup; 6w8i; 6bln; 6w7o; 4ot5; 6ep9; 5zz4; 6hr…
					2-(3,5-dichloroanilino)-1-{(3r)-3-[methyl(7h-pyrrolo[2,3-d]pyrimidin-4-yl)amino]piperidin-1-yl}ethan-1-one	bound	ZB9	6.21236	1	8flv	1	85	8gmb; 4y93; 8s93; 4xi2; 5j87; 6tfp; 7r60; 7kxm; 6omu; 7kxp; 6nfh; 5p9i; 5vfi; 5p9k; 5u9d; 6n9p; 4z3v; 5p9m; 6di5; 6di1; 6di0; 7n5y; 7n5r; 8e2m; 8ejb; 6e4f; 7kxq; 7n5o; 4zly; 4zlz; 4yhf; 7n5x; 3pix; 7l5p; 6w06; 6x3o; 7l5o; 8flv; 7kxl; 6j6m; 5p9f; 8flh; 7r61; 6x3p; 7kxn; 4ot6; 5bq0; 7kxo; 6bkw; 7ltz; 5p9g; 3gen; 8fll; 6nzm; 5p9h; 6w07; 4rx5; 5vgo; 7yc9; 5kup; 6w8i; 6bln; 6w7o; 4ot5; 6ep9; 5zz4; 6hr…	85	8gmb; 4y93; 8s93; 4xi2; 5j87; 6tfp; 7r60; 7kxm; 6omu; 7kxp; 6nfh; 5p9i; 5vfi; 5p9k; 5u9d; 6n9p; 4z3v; 5p9m; 6di5; 6di1; 6di0; 7n5y; 7n5r; 8e2m; 8ejb; 6e4f; 7kxq; 7n5o; 4zly; 4zlz; 4yhf; 7n5x; 3pix; 7l5p; 6w06; 6x3o; 7l5o; 8flv; 7kxl; 6j6m; 5p9f; 8flh; 7r61; 6x3p; 7kxn; 4ot6; 5bq0; 7kxo; 6bkw; 7ltz; 5p9g; 3gen; 8fll; 6nzm; 5p9h; 6w07; 4rx5; 5vgo; 7yc9; 5kup; 6w8i; 6bln; 6w7o; 4ot5; 6ep9; 5zz4; 6hr…
					2-(4-phenoxyphenoxy)-5-[(3r)-1-(prop-2-enoyl)piperidin-3-yl]pyridine-3-carboxamide	bound	2IE	6.18315	1	7r60	1	85	8gmb; 4y93; 8s93; 4xi2; 5j87; 6tfp; 7r60; 7kxm; 6omu; 7kxp; 6nfh; 5p9i; 5vfi; 5p9k; 5u9d; 6n9p; 4z3v; 5p9m; 6di5; 6di1; 6di0; 7n5y; 7n5r; 8e2m; 8ejb; 6e4f; 7kxq; 7n5o; 4zly; 4zlz; 4yhf; 7n5x; 3pix; 7l5p; 6w06; 6x3o; 7l5o; 8flv; 7kxl; 6j6m; 5p9f; 8flh; 7r61; 6x3p; 7kxn; 4ot6; 5bq0; 7kxo; 6bkw; 7ltz; 5p9g; 3gen; 8fll; 6nzm; 5p9h; 6w07; 4rx5; 5vgo; 7yc9; 5kup; 6w8i; 6bln; 6w7o; 4ot5; 6ep9; 5zz4; 6hr…	85	8gmb; 4y93; 8s93; 4xi2; 5j87; 6tfp; 7r60; 7kxm; 6omu; 7kxp; 6nfh; 5p9i; 5vfi; 5p9k; 5u9d; 6n9p; 4z3v; 5p9m; 6di5; 6di1; 6di0; 7n5y; 7n5r; 8e2m; 8ejb; 6e4f; 7kxq; 7n5o; 4zly; 4zlz; 4yhf; 7n5x; 3pix; 7l5p; 6w06; 6x3o; 7l5o; 8flv; 7kxl; 6j6m; 5p9f; 8flh; 7r61; 6x3p; 7kxn; 4ot6; 5bq0; 7kxo; 6bkw; 7ltz; 5p9g; 3gen; 8fll; 6nzm; 5p9h; 6w07; 4rx5; 5vgo; 7yc9; 5kup; 6w8i; 6bln; 6w7o; 4ot5; 6ep9; 5zz4; 6hr…
					2-(4-phenoxyphenoxy)-6-[(1s,4s)-5-propanoyl-2,5-diazabicyclo[2.2.1]heptan-2-yl]pyridine-3-carboxamide	bound	GJ7	6.0476	1	6di5	1	85	8gmb; 4y93; 8s93; 4xi2; 5j87; 6tfp; 7r60; 7kxm; 6omu; 7kxp; 6nfh; 5p9i; 5vfi; 5p9k; 5u9d; 6n9p; 4z3v; 5p9m; 6di5; 6di1; 6di0; 7n5y; 7n5r; 8e2m; 8ejb; 6e4f; 7kxq; 7n5o; 4zly; 4zlz; 4yhf; 7n5x; 3pix; 7l5p; 6w06; 6x3o; 7l5o; 8flv; 7kxl; 6j6m; 5p9f; 8flh; 7r61; 6x3p; 7kxn; 4ot6; 5bq0; 7kxo; 6bkw; 7ltz; 5p9g; 3gen; 8fll; 6nzm; 5p9h; 6w07; 4rx5; 5vgo; 7yc9; 5kup; 6w8i; 6bln; 6w7o; 4ot5; 6ep9; 5zz4; 6hr…	85	8gmb; 4y93; 8s93; 4xi2; 5j87; 6tfp; 7r60; 7kxm; 6omu; 7kxp; 6nfh; 5p9i; 5vfi; 5p9k; 5u9d; 6n9p; 4z3v; 5p9m; 6di5; 6di1; 6di0; 7n5y; 7n5r; 8e2m; 8ejb; 6e4f; 7kxq; 7n5o; 4zly; 4zlz; 4yhf; 7n5x; 3pix; 7l5p; 6w06; 6x3o; 7l5o; 8flv; 7kxl; 6j6m; 5p9f; 8flh; 7r61; 6x3p; 7kxn; 4ot6; 5bq0; 7kxo; 6bkw; 7ltz; 5p9g; 3gen; 8fll; 6nzm; 5p9h; 6w07; 4rx5; 5vgo; 7yc9; 5kup; 6w8i; 6bln; 6w7o; 4ot5; 6ep9; 5zz4; 6hr…
					2-[2-(hydroxymethyl)-3-{1-methyl-6-oxo-5-[(pyrimidin-4-yl)amino]-1,6-dihydropyridin-3-yl}phenyl]-6,6-dimethyl-3,4,6,7-tetrahydro-2h-cyclopenta[4,5]thieno[2,3-c]pyridin-1(5h)-one	bound	9B1	6.24208	1	5vgo	1	85	8gmb; 4y93; 8s93; 4xi2; 5j87; 6tfp; 7r60; 7kxm; 6omu; 7kxp; 6nfh; 5p9i; 5vfi; 5p9k; 5u9d; 6n9p; 4z3v; 5p9m; 6di5; 6di1; 6di0; 7n5y; 7n5r; 8e2m; 8ejb; 6e4f; 7kxq; 7n5o; 4zly; 4zlz; 4yhf; 7n5x; 3pix; 7l5p; 6w06; 6x3o; 7l5o; 8flv; 7kxl; 6j6m; 5p9f; 8flh; 7r61; 6x3p; 7kxn; 4ot6; 5bq0; 7kxo; 6bkw; 7ltz; 5p9g; 3gen; 8fll; 6nzm; 5p9h; 6w07; 4rx5; 5vgo; 7yc9; 5kup; 6w8i; 6bln; 6w7o; 4ot5; 6ep9; 5zz4; 6hr…	85	8gmb; 4y93; 8s93; 4xi2; 5j87; 6tfp; 7r60; 7kxm; 6omu; 7kxp; 6nfh; 5p9i; 5vfi; 5p9k; 5u9d; 6n9p; 4z3v; 5p9m; 6di5; 6di1; 6di0; 7n5y; 7n5r; 8e2m; 8ejb; 6e4f; 7kxq; 7n5o; 4zly; 4zlz; 4yhf; 7n5x; 3pix; 7l5p; 6w06; 6x3o; 7l5o; 8flv; 7kxl; 6j6m; 5p9f; 8flh; 7r61; 6x3p; 7kxn; 4ot6; 5bq0; 7kxo; 6bkw; 7ltz; 5p9g; 3gen; 8fll; 6nzm; 5p9h; 6w07; 4rx5; 5vgo; 7yc9; 5kup; 6w8i; 6bln; 6w7o; 4ot5; 6ep9; 5zz4; 6hr…
					2-{8-fluoro-2-[2-(hydroxymethyl)-3-(1-methyl-5-{[5-(4-methylpiperazin-1-yl)pyridin-2-yl]amino}-6-oxo-1,6-dihydropyridin-3-yl)phenyl]-1-oxo-1,2,3,4-tetrahydroisoquinolin-6-yl}-2-methylpropanenitrile	bound	3P0	6.06819	1	4rg0	1	85	8gmb; 4y93; 8s93; 4xi2; 5j87; 6tfp; 7r60; 7kxm; 6omu; 7kxp; 6nfh; 5p9i; 5vfi; 5p9k; 5u9d; 6n9p; 4z3v; 5p9m; 6di5; 6di1; 6di0; 7n5y; 7n5r; 8e2m; 8ejb; 6e4f; 7kxq; 7n5o; 4zly; 4zlz; 4yhf; 7n5x; 3pix; 7l5p; 6w06; 6x3o; 7l5o; 8flv; 7kxl; 6j6m; 5p9f; 8flh; 7r61; 6x3p; 7kxn; 4ot6; 5bq0; 7kxo; 6bkw; 7ltz; 5p9g; 3gen; 8fll; 6nzm; 5p9h; 6w07; 4rx5; 5vgo; 7yc9; 5kup; 6w8i; 6bln; 6w7o; 4ot5; 6ep9; 5zz4; 6hr…	85	8gmb; 4y93; 8s93; 4xi2; 5j87; 6tfp; 7r60; 7kxm; 6omu; 7kxp; 6nfh; 5p9i; 5vfi; 5p9k; 5u9d; 6n9p; 4z3v; 5p9m; 6di5; 6di1; 6di0; 7n5y; 7n5r; 8e2m; 8ejb; 6e4f; 7kxq; 7n5o; 4zly; 4zlz; 4yhf; 7n5x; 3pix; 7l5p; 6w06; 6x3o; 7l5o; 8flv; 7kxl; 6j6m; 5p9f; 8flh; 7r61; 6x3p; 7kxn; 4ot6; 5bq0; 7kxo; 6bkw; 7ltz; 5p9g; 3gen; 8fll; 6nzm; 5p9h; 6w07; 4rx5; 5vgo; 7yc9; 5kup; 6w8i; 6bln; 6w7o; 4ot5; 6ep9; 5zz4; 6hr…
					3-tert-butyl-n-({2-fluoro-4-[2-(1-methyl-1h-pyrazol-4-yl)-1h-imidazo[4,5-b]pyridin-7-yl]phenyl}methyl)-1,2,4-oxadiazole-5-carboxamide	bound	X9J	6.30582	1	7kxl	1	85	8gmb; 4y93; 8s93; 4xi2; 5j87; 6tfp; 7r60; 7kxm; 6omu; 7kxp; 6nfh; 5p9i; 5vfi; 5p9k; 5u9d; 6n9p; 4z3v; 5p9m; 6di5; 6di1; 6di0; 7n5y; 7n5r; 8e2m; 8ejb; 6e4f; 7kxq; 7n5o; 4zly; 4zlz; 4yhf; 7n5x; 3pix; 7l5p; 6w06; 6x3o; 7l5o; 8flv; 7kxl; 6j6m; 5p9f; 8flh; 7r61; 6x3p; 7kxn; 4ot6; 5bq0; 7kxo; 6bkw; 7ltz; 5p9g; 3gen; 8fll; 6nzm; 5p9h; 6w07; 4rx5; 5vgo; 7yc9; 5kup; 6w8i; 6bln; 6w7o; 4ot5; 6ep9; 5zz4; 6hr…	85	8gmb; 4y93; 8s93; 4xi2; 5j87; 6tfp; 7r60; 7kxm; 6omu; 7kxp; 6nfh; 5p9i; 5vfi; 5p9k; 5u9d; 6n9p; 4z3v; 5p9m; 6di5; 6di1; 6di0; 7n5y; 7n5r; 8e2m; 8ejb; 6e4f; 7kxq; 7n5o; 4zly; 4zlz; 4yhf; 7n5x; 3pix; 7l5p; 6w06; 6x3o; 7l5o; 8flv; 7kxl; 6j6m; 5p9f; 8flh; 7r61; 6x3p; 7kxn; 4ot6; 5bq0; 7kxo; 6bkw; 7ltz; 5p9g; 3gen; 8fll; 6nzm; 5p9h; 6w07; 4rx5; 5vgo; 7yc9; 5kup; 6w8i; 6bln; 6w7o; 4ot5; 6ep9; 5zz4; 6hr…
					3-tert-butyl-n-[(1r)-6-{2-[5-methyl-1-(oxan-4-yl)-1h-pyrazol-4-yl]-3h-imidazo[4,5-b]pyridin-7-yl}-1,2,3,4-tetrahydronaphthalen-1-yl]-1,2,4-oxadiazole-5-carboxamide	bound	X9S	6.22279	1	7kxo	1	85	8gmb; 4y93; 8s93; 4xi2; 5j87; 6tfp; 7r60; 7kxm; 6omu; 7kxp; 6nfh; 5p9i; 5vfi; 5p9k; 5u9d; 6n9p; 4z3v; 5p9m; 6di5; 6di1; 6di0; 7n5y; 7n5r; 8e2m; 8ejb; 6e4f; 7kxq; 7n5o; 4zly; 4zlz; 4yhf; 7n5x; 3pix; 7l5p; 6w06; 6x3o; 7l5o; 8flv; 7kxl; 6j6m; 5p9f; 8flh; 7r61; 6x3p; 7kxn; 4ot6; 5bq0; 7kxo; 6bkw; 7ltz; 5p9g; 3gen; 8fll; 6nzm; 5p9h; 6w07; 4rx5; 5vgo; 7yc9; 5kup; 6w8i; 6bln; 6w7o; 4ot5; 6ep9; 5zz4; 6hr…	85	8gmb; 4y93; 8s93; 4xi2; 5j87; 6tfp; 7r60; 7kxm; 6omu; 7kxp; 6nfh; 5p9i; 5vfi; 5p9k; 5u9d; 6n9p; 4z3v; 5p9m; 6di5; 6di1; 6di0; 7n5y; 7n5r; 8e2m; 8ejb; 6e4f; 7kxq; 7n5o; 4zly; 4zlz; 4yhf; 7n5x; 3pix; 7l5p; 6w06; 6x3o; 7l5o; 8flv; 7kxl; 6j6m; 5p9f; 8flh; 7r61; 6x3p; 7kxn; 4ot6; 5bq0; 7kxo; 6bkw; 7ltz; 5p9g; 3gen; 8fll; 6nzm; 5p9h; 6w07; 4rx5; 5vgo; 7yc9; 5kup; 6w8i; 6bln; 6w7o; 4ot5; 6ep9; 5zz4; 6hr…
					3-tert-butyl-n-[(1s)-6-{2-[3-methyl-1-(oxan-4-yl)-1h-pyrazol-4-yl]-1h-imidazo[4,5-b]pyridin-7-yl}-1,2,3,4-tetrahydronaphthalen-1-yl]-1,2,4-oxadiazole-5-carboxamide	bound	X9V	6.37985	1	7kxp	1	85	8gmb; 4y93; 8s93; 4xi2; 5j87; 6tfp; 7r60; 7kxm; 6omu; 7kxp; 6nfh; 5p9i; 5vfi; 5p9k; 5u9d; 6n9p; 4z3v; 5p9m; 6di5; 6di1; 6di0; 7n5y; 7n5r; 8e2m; 8ejb; 6e4f; 7kxq; 7n5o; 4zly; 4zlz; 4yhf; 7n5x; 3pix; 7l5p; 6w06; 6x3o; 7l5o; 8flv; 7kxl; 6j6m; 5p9f; 8flh; 7r61; 6x3p; 7kxn; 4ot6; 5bq0; 7kxo; 6bkw; 7ltz; 5p9g; 3gen; 8fll; 6nzm; 5p9h; 6w07; 4rx5; 5vgo; 7yc9; 5kup; 6w8i; 6bln; 6w7o; 4ot5; 6ep9; 5zz4; 6hr…	85	8gmb; 4y93; 8s93; 4xi2; 5j87; 6tfp; 7r60; 7kxm; 6omu; 7kxp; 6nfh; 5p9i; 5vfi; 5p9k; 5u9d; 6n9p; 4z3v; 5p9m; 6di5; 6di1; 6di0; 7n5y; 7n5r; 8e2m; 8ejb; 6e4f; 7kxq; 7n5o; 4zly; 4zlz; 4yhf; 7n5x; 3pix; 7l5p; 6w06; 6x3o; 7l5o; 8flv; 7kxl; 6j6m; 5p9f; 8flh; 7r61; 6x3p; 7kxn; 4ot6; 5bq0; 7kxo; 6bkw; 7ltz; 5p9g; 3gen; 8fll; 6nzm; 5p9h; 6w07; 4rx5; 5vgo; 7yc9; 5kup; 6w8i; 6bln; 6w7o; 4ot5; 6ep9; 5zz4; 6hr…
					3-tert-butyl-n-[(1s)-6-{2-[5-methyl-1-(propan-2-yl)-1h-pyrazol-4-yl]-1h-imidazo[4,5-b]pyridin-7-yl}-1,2,3,4-tetrahydronaphthalen-1-yl]-1,2,4-oxadiazole-5-carboxamide	bound	X9P	6.26393	1	7kxn	1	85	8gmb; 4y93; 8s93; 4xi2; 5j87; 6tfp; 7r60; 7kxm; 6omu; 7kxp; 6nfh; 5p9i; 5vfi; 5p9k; 5u9d; 6n9p; 4z3v; 5p9m; 6di5; 6di1; 6di0; 7n5y; 7n5r; 8e2m; 8ejb; 6e4f; 7kxq; 7n5o; 4zly; 4zlz; 4yhf; 7n5x; 3pix; 7l5p; 6w06; 6x3o; 7l5o; 8flv; 7kxl; 6j6m; 5p9f; 8flh; 7r61; 6x3p; 7kxn; 4ot6; 5bq0; 7kxo; 6bkw; 7ltz; 5p9g; 3gen; 8fll; 6nzm; 5p9h; 6w07; 4rx5; 5vgo; 7yc9; 5kup; 6w8i; 6bln; 6w7o; 4ot5; 6ep9; 5zz4; 6hr…	85	8gmb; 4y93; 8s93; 4xi2; 5j87; 6tfp; 7r60; 7kxm; 6omu; 7kxp; 6nfh; 5p9i; 5vfi; 5p9k; 5u9d; 6n9p; 4z3v; 5p9m; 6di5; 6di1; 6di0; 7n5y; 7n5r; 8e2m; 8ejb; 6e4f; 7kxq; 7n5o; 4zly; 4zlz; 4yhf; 7n5x; 3pix; 7l5p; 6w06; 6x3o; 7l5o; 8flv; 7kxl; 6j6m; 5p9f; 8flh; 7r61; 6x3p; 7kxn; 4ot6; 5bq0; 7kxo; 6bkw; 7ltz; 5p9g; 3gen; 8fll; 6nzm; 5p9h; 6w07; 4rx5; 5vgo; 7yc9; 5kup; 6w8i; 6bln; 6w7o; 4ot5; 6ep9; 5zz4; 6hr…
					3-tert-butyl-n-[(5r)-2-{2-[3,5-dimethyl-1-(propan-2-yl)-1h-pyrazol-4-yl]-3h-imidazo[4,5-b]pyridin-7-yl}-6,7,8,9-tetrahydro-5h-benzo[7]annulen-5-yl]-1,2,4-oxadiazole-5-carboxamide	bound	X9Y	6.1705	1	7kxq	1	85	8gmb; 4y93; 8s93; 4xi2; 5j87; 6tfp; 7r60; 7kxm; 6omu; 7kxp; 6nfh; 5p9i; 5vfi; 5p9k; 5u9d; 6n9p; 4z3v; 5p9m; 6di5; 6di1; 6di0; 7n5y; 7n5r; 8e2m; 8ejb; 6e4f; 7kxq; 7n5o; 4zly; 4zlz; 4yhf; 7n5x; 3pix; 7l5p; 6w06; 6x3o; 7l5o; 8flv; 7kxl; 6j6m; 5p9f; 8flh; 7r61; 6x3p; 7kxn; 4ot6; 5bq0; 7kxo; 6bkw; 7ltz; 5p9g; 3gen; 8fll; 6nzm; 5p9h; 6w07; 4rx5; 5vgo; 7yc9; 5kup; 6w8i; 6bln; 6w7o; 4ot5; 6ep9; 5zz4; 6hr…	85	8gmb; 4y93; 8s93; 4xi2; 5j87; 6tfp; 7r60; 7kxm; 6omu; 7kxp; 6nfh; 5p9i; 5vfi; 5p9k; 5u9d; 6n9p; 4z3v; 5p9m; 6di5; 6di1; 6di0; 7n5y; 7n5r; 8e2m; 8ejb; 6e4f; 7kxq; 7n5o; 4zly; 4zlz; 4yhf; 7n5x; 3pix; 7l5p; 6w06; 6x3o; 7l5o; 8flv; 7kxl; 6j6m; 5p9f; 8flh; 7r61; 6x3p; 7kxn; 4ot6; 5bq0; 7kxo; 6bkw; 7ltz; 5p9g; 3gen; 8fll; 6nzm; 5p9h; 6w07; 4rx5; 5vgo; 7yc9; 5kup; 6w8i; 6bln; 6w7o; 4ot5; 6ep9; 5zz4; 6hr…
					4-(2-chlorophenyl)-7-[(4-methylpiperazin-1-yl)carbonyl]-9h-carbazole-1-carboxamide	bound	4US	5.76316	1	5bq0	1	85	8gmb; 4y93; 8s93; 4xi2; 5j87; 6tfp; 7r60; 7kxm; 6omu; 7kxp; 6nfh; 5p9i; 5vfi; 5p9k; 5u9d; 6n9p; 4z3v; 5p9m; 6di5; 6di1; 6di0; 7n5y; 7n5r; 8e2m; 8ejb; 6e4f; 7kxq; 7n5o; 4zly; 4zlz; 4yhf; 7n5x; 3pix; 7l5p; 6w06; 6x3o; 7l5o; 8flv; 7kxl; 6j6m; 5p9f; 8flh; 7r61; 6x3p; 7kxn; 4ot6; 5bq0; 7kxo; 6bkw; 7ltz; 5p9g; 3gen; 8fll; 6nzm; 5p9h; 6w07; 4rx5; 5vgo; 7yc9; 5kup; 6w8i; 6bln; 6w7o; 4ot5; 6ep9; 5zz4; 6hr…	85	8gmb; 4y93; 8s93; 4xi2; 5j87; 6tfp; 7r60; 7kxm; 6omu; 7kxp; 6nfh; 5p9i; 5vfi; 5p9k; 5u9d; 6n9p; 4z3v; 5p9m; 6di5; 6di1; 6di0; 7n5y; 7n5r; 8e2m; 8ejb; 6e4f; 7kxq; 7n5o; 4zly; 4zlz; 4yhf; 7n5x; 3pix; 7l5p; 6w06; 6x3o; 7l5o; 8flv; 7kxl; 6j6m; 5p9f; 8flh; 7r61; 6x3p; 7kxn; 4ot6; 5bq0; 7kxo; 6bkw; 7ltz; 5p9g; 3gen; 8fll; 6nzm; 5p9h; 6w07; 4rx5; 5vgo; 7yc9; 5kup; 6w8i; 6bln; 6w7o; 4ot5; 6ep9; 5zz4; 6hr…
					4-(methylsulfonyl)-n-[3-(8-{[4-(morpholin-4-ylcarbonyl)phenyl]amino}imidazo[1,2-a]pyrazin-6-yl)phenyl]benzamide	bound	2V1	5.95926	1	4ot6	1	85	8gmb; 4y93; 8s93; 4xi2; 5j87; 6tfp; 7r60; 7kxm; 6omu; 7kxp; 6nfh; 5p9i; 5vfi; 5p9k; 5u9d; 6n9p; 4z3v; 5p9m; 6di5; 6di1; 6di0; 7n5y; 7n5r; 8e2m; 8ejb; 6e4f; 7kxq; 7n5o; 4zly; 4zlz; 4yhf; 7n5x; 3pix; 7l5p; 6w06; 6x3o; 7l5o; 8flv; 7kxl; 6j6m; 5p9f; 8flh; 7r61; 6x3p; 7kxn; 4ot6; 5bq0; 7kxo; 6bkw; 7ltz; 5p9g; 3gen; 8fll; 6nzm; 5p9h; 6w07; 4rx5; 5vgo; 7yc9; 5kup; 6w8i; 6bln; 6w7o; 4ot5; 6ep9; 5zz4; 6hr…	85	8gmb; 4y93; 8s93; 4xi2; 5j87; 6tfp; 7r60; 7kxm; 6omu; 7kxp; 6nfh; 5p9i; 5vfi; 5p9k; 5u9d; 6n9p; 4z3v; 5p9m; 6di5; 6di1; 6di0; 7n5y; 7n5r; 8e2m; 8ejb; 6e4f; 7kxq; 7n5o; 4zly; 4zlz; 4yhf; 7n5x; 3pix; 7l5p; 6w06; 6x3o; 7l5o; 8flv; 7kxl; 6j6m; 5p9f; 8flh; 7r61; 6x3p; 7kxn; 4ot6; 5bq0; 7kxo; 6bkw; 7ltz; 5p9g; 3gen; 8fll; 6nzm; 5p9h; 6w07; 4rx5; 5vgo; 7yc9; 5kup; 6w8i; 6bln; 6w7o; 4ot5; 6ep9; 5zz4; 6hr…
					4-[4-[[5-fluoranyl-4-[[3-(propanoylamino)phenyl]amino]pyrimidin-2-yl]amino]phenoxy]-~{n}-methyl-pyridine-2-carboxamide	bound	7G8	6.21724	1	5p9k	1	85	8gmb; 4y93; 8s93; 4xi2; 5j87; 6tfp; 7r60; 7kxm; 6omu; 7kxp; 6nfh; 5p9i; 5vfi; 5p9k; 5u9d; 6n9p; 4z3v; 5p9m; 6di5; 6di1; 6di0; 7n5y; 7n5r; 8e2m; 8ejb; 6e4f; 7kxq; 7n5o; 4zly; 4zlz; 4yhf; 7n5x; 3pix; 7l5p; 6w06; 6x3o; 7l5o; 8flv; 7kxl; 6j6m; 5p9f; 8flh; 7r61; 6x3p; 7kxn; 4ot6; 5bq0; 7kxo; 6bkw; 7ltz; 5p9g; 3gen; 8fll; 6nzm; 5p9h; 6w07; 4rx5; 5vgo; 7yc9; 5kup; 6w8i; 6bln; 6w7o; 4ot5; 6ep9; 5zz4; 6hr…	85	8gmb; 4y93; 8s93; 4xi2; 5j87; 6tfp; 7r60; 7kxm; 6omu; 7kxp; 6nfh; 5p9i; 5vfi; 5p9k; 5u9d; 6n9p; 4z3v; 5p9m; 6di5; 6di1; 6di0; 7n5y; 7n5r; 8e2m; 8ejb; 6e4f; 7kxq; 7n5o; 4zly; 4zlz; 4yhf; 7n5x; 3pix; 7l5p; 6w06; 6x3o; 7l5o; 8flv; 7kxl; 6j6m; 5p9f; 8flh; 7r61; 6x3p; 7kxn; 4ot6; 5bq0; 7kxo; 6bkw; 7ltz; 5p9g; 3gen; 8fll; 6nzm; 5p9h; 6w07; 4rx5; 5vgo; 7yc9; 5kup; 6w8i; 6bln; 6w7o; 4ot5; 6ep9; 5zz4; 6hr…
					4-amino-2-[(3s)-3-(propanoylamino)pyrrolidin-1-yl]pyrimidine-5-carboxamide	bound	GJD	6.01184	1	6di1	1	85	8gmb; 4y93; 8s93; 4xi2; 5j87; 6tfp; 7r60; 7kxm; 6omu; 7kxp; 6nfh; 5p9i; 5vfi; 5p9k; 5u9d; 6n9p; 4z3v; 5p9m; 6di5; 6di1; 6di0; 7n5y; 7n5r; 8e2m; 8ejb; 6e4f; 7kxq; 7n5o; 4zly; 4zlz; 4yhf; 7n5x; 3pix; 7l5p; 6w06; 6x3o; 7l5o; 8flv; 7kxl; 6j6m; 5p9f; 8flh; 7r61; 6x3p; 7kxn; 4ot6; 5bq0; 7kxo; 6bkw; 7ltz; 5p9g; 3gen; 8fll; 6nzm; 5p9h; 6w07; 4rx5; 5vgo; 7yc9; 5kup; 6w8i; 6bln; 6w7o; 4ot5; 6ep9; 5zz4; 6hr…	85	8gmb; 4y93; 8s93; 4xi2; 5j87; 6tfp; 7r60; 7kxm; 6omu; 7kxp; 6nfh; 5p9i; 5vfi; 5p9k; 5u9d; 6n9p; 4z3v; 5p9m; 6di5; 6di1; 6di0; 7n5y; 7n5r; 8e2m; 8ejb; 6e4f; 7kxq; 7n5o; 4zly; 4zlz; 4yhf; 7n5x; 3pix; 7l5p; 6w06; 6x3o; 7l5o; 8flv; 7kxl; 6j6m; 5p9f; 8flh; 7r61; 6x3p; 7kxn; 4ot6; 5bq0; 7kxo; 6bkw; 7ltz; 5p9g; 3gen; 8fll; 6nzm; 5p9h; 6w07; 4rx5; 5vgo; 7yc9; 5kup; 6w8i; 6bln; 6w7o; 4ot5; 6ep9; 5zz4; 6hr…
					4-amino-5-(4-phenoxyphenyl)-7h-pyrrolo[2,3-d]pyrimidin-7-yl-cyclopentane	bound	B43	6.18236	1	3gen	1	85	8gmb; 4y93; 8s93; 4xi2; 5j87; 6tfp; 7r60; 7kxm; 6omu; 7kxp; 6nfh; 5p9i; 5vfi; 5p9k; 5u9d; 6n9p; 4z3v; 5p9m; 6di5; 6di1; 6di0; 7n5y; 7n5r; 8e2m; 8ejb; 6e4f; 7kxq; 7n5o; 4zly; 4zlz; 4yhf; 7n5x; 3pix; 7l5p; 6w06; 6x3o; 7l5o; 8flv; 7kxl; 6j6m; 5p9f; 8flh; 7r61; 6x3p; 7kxn; 4ot6; 5bq0; 7kxo; 6bkw; 7ltz; 5p9g; 3gen; 8fll; 6nzm; 5p9h; 6w07; 4rx5; 5vgo; 7yc9; 5kup; 6w8i; 6bln; 6w7o; 4ot5; 6ep9; 5zz4; 6hr…	85	8gmb; 4y93; 8s93; 4xi2; 5j87; 6tfp; 7r60; 7kxm; 6omu; 7kxp; 6nfh; 5p9i; 5vfi; 5p9k; 5u9d; 6n9p; 4z3v; 5p9m; 6di5; 6di1; 6di0; 7n5y; 7n5r; 8e2m; 8ejb; 6e4f; 7kxq; 7n5o; 4zly; 4zlz; 4yhf; 7n5x; 3pix; 7l5p; 6w06; 6x3o; 7l5o; 8flv; 7kxl; 6j6m; 5p9f; 8flh; 7r61; 6x3p; 7kxn; 4ot6; 5bq0; 7kxo; 6bkw; 7ltz; 5p9g; 3gen; 8fll; 6nzm; 5p9h; 6w07; 4rx5; 5vgo; 7yc9; 5kup; 6w8i; 6bln; 6w7o; 4ot5; 6ep9; 5zz4; 6hr…
					4-amino-8-(4-methylpyridin-3-yl)cinnoline-3-carboxamide	bound	4RV	6.06895	1	4zlz	1	85	8gmb; 4y93; 8s93; 4xi2; 5j87; 6tfp; 7r60; 7kxm; 6omu; 7kxp; 6nfh; 5p9i; 5vfi; 5p9k; 5u9d; 6n9p; 4z3v; 5p9m; 6di5; 6di1; 6di0; 7n5y; 7n5r; 8e2m; 8ejb; 6e4f; 7kxq; 7n5o; 4zly; 4zlz; 4yhf; 7n5x; 3pix; 7l5p; 6w06; 6x3o; 7l5o; 8flv; 7kxl; 6j6m; 5p9f; 8flh; 7r61; 6x3p; 7kxn; 4ot6; 5bq0; 7kxo; 6bkw; 7ltz; 5p9g; 3gen; 8fll; 6nzm; 5p9h; 6w07; 4rx5; 5vgo; 7yc9; 5kup; 6w8i; 6bln; 6w7o; 4ot5; 6ep9; 5zz4; 6hr…	85	8gmb; 4y93; 8s93; 4xi2; 5j87; 6tfp; 7r60; 7kxm; 6omu; 7kxp; 6nfh; 5p9i; 5vfi; 5p9k; 5u9d; 6n9p; 4z3v; 5p9m; 6di5; 6di1; 6di0; 7n5y; 7n5r; 8e2m; 8ejb; 6e4f; 7kxq; 7n5o; 4zly; 4zlz; 4yhf; 7n5x; 3pix; 7l5p; 6w06; 6x3o; 7l5o; 8flv; 7kxl; 6j6m; 5p9f; 8flh; 7r61; 6x3p; 7kxn; 4ot6; 5bq0; 7kxo; 6bkw; 7ltz; 5p9g; 3gen; 8fll; 6nzm; 5p9h; 6w07; 4rx5; 5vgo; 7yc9; 5kup; 6w8i; 6bln; 6w7o; 4ot5; 6ep9; 5zz4; 6hr…
					4-amino-8-(5-methyl-1h-indazol-6-yl)cinnoline-3-carboxamide	bound	4L6	6.17132	1	4z3v	1	85	8gmb; 4y93; 8s93; 4xi2; 5j87; 6tfp; 7r60; 7kxm; 6omu; 7kxp; 6nfh; 5p9i; 5vfi; 5p9k; 5u9d; 6n9p; 4z3v; 5p9m; 6di5; 6di1; 6di0; 7n5y; 7n5r; 8e2m; 8ejb; 6e4f; 7kxq; 7n5o; 4zly; 4zlz; 4yhf; 7n5x; 3pix; 7l5p; 6w06; 6x3o; 7l5o; 8flv; 7kxl; 6j6m; 5p9f; 8flh; 7r61; 6x3p; 7kxn; 4ot6; 5bq0; 7kxo; 6bkw; 7ltz; 5p9g; 3gen; 8fll; 6nzm; 5p9h; 6w07; 4rx5; 5vgo; 7yc9; 5kup; 6w8i; 6bln; 6w7o; 4ot5; 6ep9; 5zz4; 6hr…	85	8gmb; 4y93; 8s93; 4xi2; 5j87; 6tfp; 7r60; 7kxm; 6omu; 7kxp; 6nfh; 5p9i; 5vfi; 5p9k; 5u9d; 6n9p; 4z3v; 5p9m; 6di5; 6di1; 6di0; 7n5y; 7n5r; 8e2m; 8ejb; 6e4f; 7kxq; 7n5o; 4zly; 4zlz; 4yhf; 7n5x; 3pix; 7l5p; 6w06; 6x3o; 7l5o; 8flv; 7kxl; 6j6m; 5p9f; 8flh; 7r61; 6x3p; 7kxn; 4ot6; 5bq0; 7kxo; 6bkw; 7ltz; 5p9g; 3gen; 8fll; 6nzm; 5p9h; 6w07; 4rx5; 5vgo; 7yc9; 5kup; 6w8i; 6bln; 6w7o; 4ot5; 6ep9; 5zz4; 6hr…
					4-aminocinnoline-3-carboxamide	bound	4RU	6.02256	1	4zly	1	85	8gmb; 4y93; 8s93; 4xi2; 5j87; 6tfp; 7r60; 7kxm; 6omu; 7kxp; 6nfh; 5p9i; 5vfi; 5p9k; 5u9d; 6n9p; 4z3v; 5p9m; 6di5; 6di1; 6di0; 7n5y; 7n5r; 8e2m; 8ejb; 6e4f; 7kxq; 7n5o; 4zly; 4zlz; 4yhf; 7n5x; 3pix; 7l5p; 6w06; 6x3o; 7l5o; 8flv; 7kxl; 6j6m; 5p9f; 8flh; 7r61; 6x3p; 7kxn; 4ot6; 5bq0; 7kxo; 6bkw; 7ltz; 5p9g; 3gen; 8fll; 6nzm; 5p9h; 6w07; 4rx5; 5vgo; 7yc9; 5kup; 6w8i; 6bln; 6w7o; 4ot5; 6ep9; 5zz4; 6hr…	85	8gmb; 4y93; 8s93; 4xi2; 5j87; 6tfp; 7r60; 7kxm; 6omu; 7kxp; 6nfh; 5p9i; 5vfi; 5p9k; 5u9d; 6n9p; 4z3v; 5p9m; 6di5; 6di1; 6di0; 7n5y; 7n5r; 8e2m; 8ejb; 6e4f; 7kxq; 7n5o; 4zly; 4zlz; 4yhf; 7n5x; 3pix; 7l5p; 6w06; 6x3o; 7l5o; 8flv; 7kxl; 6j6m; 5p9f; 8flh; 7r61; 6x3p; 7kxn; 4ot6; 5bq0; 7kxo; 6bkw; 7ltz; 5p9g; 3gen; 8fll; 6nzm; 5p9h; 6w07; 4rx5; 5vgo; 7yc9; 5kup; 6w8i; 6bln; 6w7o; 4ot5; 6ep9; 5zz4; 6hr…
					4-tert-butyl-n-(2-methyl-3-{2-[4-(morpholine-4-carbonyl)phenyl]-1h-imidazo[4,5-b]pyridin-7-yl}phenyl)benzamide	bound	X9M	6.5488	1	7kxm	1	85	8gmb; 4y93; 8s93; 4xi2; 5j87; 6tfp; 7r60; 7kxm; 6omu; 7kxp; 6nfh; 5p9i; 5vfi; 5p9k; 5u9d; 6n9p; 4z3v; 5p9m; 6di5; 6di1; 6di0; 7n5y; 7n5r; 8e2m; 8ejb; 6e4f; 7kxq; 7n5o; 4zly; 4zlz; 4yhf; 7n5x; 3pix; 7l5p; 6w06; 6x3o; 7l5o; 8flv; 7kxl; 6j6m; 5p9f; 8flh; 7r61; 6x3p; 7kxn; 4ot6; 5bq0; 7kxo; 6bkw; 7ltz; 5p9g; 3gen; 8fll; 6nzm; 5p9h; 6w07; 4rx5; 5vgo; 7yc9; 5kup; 6w8i; 6bln; 6w7o; 4ot5; 6ep9; 5zz4; 6hr…	85	8gmb; 4y93; 8s93; 4xi2; 5j87; 6tfp; 7r60; 7kxm; 6omu; 7kxp; 6nfh; 5p9i; 5vfi; 5p9k; 5u9d; 6n9p; 4z3v; 5p9m; 6di5; 6di1; 6di0; 7n5y; 7n5r; 8e2m; 8ejb; 6e4f; 7kxq; 7n5o; 4zly; 4zlz; 4yhf; 7n5x; 3pix; 7l5p; 6w06; 6x3o; 7l5o; 8flv; 7kxl; 6j6m; 5p9f; 8flh; 7r61; 6x3p; 7kxn; 4ot6; 5bq0; 7kxo; 6bkw; 7ltz; 5p9g; 3gen; 8fll; 6nzm; 5p9h; 6w07; 4rx5; 5vgo; 7yc9; 5kup; 6w8i; 6bln; 6w7o; 4ot5; 6ep9; 5zz4; 6hr…
					4-tert-butyl-n-[2-(hydroxymethyl)-3-(1-methyl-5-{[5-(morpholine-4-carbonyl)pyridin-2-yl]amino}-6-oxo-1,6-dihydropyridazin-3-yl)phenyl]benzamide	bound	DTJ	6.11658	1	6bik	1	85	8gmb; 4y93; 8s93; 4xi2; 5j87; 6tfp; 7r60; 7kxm; 6omu; 7kxp; 6nfh; 5p9i; 5vfi; 5p9k; 5u9d; 6n9p; 4z3v; 5p9m; 6di5; 6di1; 6di0; 7n5y; 7n5r; 8e2m; 8ejb; 6e4f; 7kxq; 7n5o; 4zly; 4zlz; 4yhf; 7n5x; 3pix; 7l5p; 6w06; 6x3o; 7l5o; 8flv; 7kxl; 6j6m; 5p9f; 8flh; 7r61; 6x3p; 7kxn; 4ot6; 5bq0; 7kxo; 6bkw; 7ltz; 5p9g; 3gen; 8fll; 6nzm; 5p9h; 6w07; 4rx5; 5vgo; 7yc9; 5kup; 6w8i; 6bln; 6w7o; 4ot5; 6ep9; 5zz4; 6hr…	85	8gmb; 4y93; 8s93; 4xi2; 5j87; 6tfp; 7r60; 7kxm; 6omu; 7kxp; 6nfh; 5p9i; 5vfi; 5p9k; 5u9d; 6n9p; 4z3v; 5p9m; 6di5; 6di1; 6di0; 7n5y; 7n5r; 8e2m; 8ejb; 6e4f; 7kxq; 7n5o; 4zly; 4zlz; 4yhf; 7n5x; 3pix; 7l5p; 6w06; 6x3o; 7l5o; 8flv; 7kxl; 6j6m; 5p9f; 8flh; 7r61; 6x3p; 7kxn; 4ot6; 5bq0; 7kxo; 6bkw; 7ltz; 5p9g; 3gen; 8fll; 6nzm; 5p9h; 6w07; 4rx5; 5vgo; 7yc9; 5kup; 6w8i; 6bln; 6w7o; 4ot5; 6ep9; 5zz4; 6hr…
					4-tert-butyl-n-[2-methyl-3-(1-methyl-5-{[5-(morpholine-4-carbonyl)pyridin-2-yl]amino}-6-oxo-1,6-dihydropyridin-3-yl)phenyl]benzamide	bound	BXM	6.06946	1	6aub	1	85	8gmb; 4y93; 8s93; 4xi2; 5j87; 6tfp; 7r60; 7kxm; 6omu; 7kxp; 6nfh; 5p9i; 5vfi; 5p9k; 5u9d; 6n9p; 4z3v; 5p9m; 6di5; 6di1; 6di0; 7n5y; 7n5r; 8e2m; 8ejb; 6e4f; 7kxq; 7n5o; 4zly; 4zlz; 4yhf; 7n5x; 3pix; 7l5p; 6w06; 6x3o; 7l5o; 8flv; 7kxl; 6j6m; 5p9f; 8flh; 7r61; 6x3p; 7kxn; 4ot6; 5bq0; 7kxo; 6bkw; 7ltz; 5p9g; 3gen; 8fll; 6nzm; 5p9h; 6w07; 4rx5; 5vgo; 7yc9; 5kup; 6w8i; 6bln; 6w7o; 4ot5; 6ep9; 5zz4; 6hr…	85	8gmb; 4y93; 8s93; 4xi2; 5j87; 6tfp; 7r60; 7kxm; 6omu; 7kxp; 6nfh; 5p9i; 5vfi; 5p9k; 5u9d; 6n9p; 4z3v; 5p9m; 6di5; 6di1; 6di0; 7n5y; 7n5r; 8e2m; 8ejb; 6e4f; 7kxq; 7n5o; 4zly; 4zlz; 4yhf; 7n5x; 3pix; 7l5p; 6w06; 6x3o; 7l5o; 8flv; 7kxl; 6j6m; 5p9f; 8flh; 7r61; 6x3p; 7kxn; 4ot6; 5bq0; 7kxo; 6bkw; 7ltz; 5p9g; 3gen; 8fll; 6nzm; 5p9h; 6w07; 4rx5; 5vgo; 7yc9; 5kup; 6w8i; 6bln; 6w7o; 4ot5; 6ep9; 5zz4; 6hr…
					4-tert-butyl-n-{3-[8-({4-[(4-methylpiperazin-1-yl)carbonyl]phenyl}amino)imidazo[1,2-a]pyrazin-6-yl]phenyl}benzamide	bound	481	5.91519	1	4ot5	1	85	8gmb; 4y93; 8s93; 4xi2; 5j87; 6tfp; 7r60; 7kxm; 6omu; 7kxp; 6nfh; 5p9i; 5vfi; 5p9k; 5u9d; 6n9p; 4z3v; 5p9m; 6di5; 6di1; 6di0; 7n5y; 7n5r; 8e2m; 8ejb; 6e4f; 7kxq; 7n5o; 4zly; 4zlz; 4yhf; 7n5x; 3pix; 7l5p; 6w06; 6x3o; 7l5o; 8flv; 7kxl; 6j6m; 5p9f; 8flh; 7r61; 6x3p; 7kxn; 4ot6; 5bq0; 7kxo; 6bkw; 7ltz; 5p9g; 3gen; 8fll; 6nzm; 5p9h; 6w07; 4rx5; 5vgo; 7yc9; 5kup; 6w8i; 6bln; 6w7o; 4ot5; 6ep9; 5zz4; 6hr…	85	8gmb; 4y93; 8s93; 4xi2; 5j87; 6tfp; 7r60; 7kxm; 6omu; 7kxp; 6nfh; 5p9i; 5vfi; 5p9k; 5u9d; 6n9p; 4z3v; 5p9m; 6di5; 6di1; 6di0; 7n5y; 7n5r; 8e2m; 8ejb; 6e4f; 7kxq; 7n5o; 4zly; 4zlz; 4yhf; 7n5x; 3pix; 7l5p; 6w06; 6x3o; 7l5o; 8flv; 7kxl; 6j6m; 5p9f; 8flh; 7r61; 6x3p; 7kxn; 4ot6; 5bq0; 7kxo; 6bkw; 7ltz; 5p9g; 3gen; 8fll; 6nzm; 5p9h; 6w07; 4rx5; 5vgo; 7yc9; 5kup; 6w8i; 6bln; 6w7o; 4ot5; 6ep9; 5zz4; 6hr…
					4-~{tert}-butyl-~{n}-[[4-(7~{h}-pyrrolo[2,3-d]pyrimidin-4-yl)phenyl]methyl]benzamide	bound	S5M	6.34576	1	6w06	1	85	8gmb; 4y93; 8s93; 4xi2; 5j87; 6tfp; 7r60; 7kxm; 6omu; 7kxp; 6nfh; 5p9i; 5vfi; 5p9k; 5u9d; 6n9p; 4z3v; 5p9m; 6di5; 6di1; 6di0; 7n5y; 7n5r; 8e2m; 8ejb; 6e4f; 7kxq; 7n5o; 4zly; 4zlz; 4yhf; 7n5x; 3pix; 7l5p; 6w06; 6x3o; 7l5o; 8flv; 7kxl; 6j6m; 5p9f; 8flh; 7r61; 6x3p; 7kxn; 4ot6; 5bq0; 7kxo; 6bkw; 7ltz; 5p9g; 3gen; 8fll; 6nzm; 5p9h; 6w07; 4rx5; 5vgo; 7yc9; 5kup; 6w8i; 6bln; 6w7o; 4ot5; 6ep9; 5zz4; 6hr…	85	8gmb; 4y93; 8s93; 4xi2; 5j87; 6tfp; 7r60; 7kxm; 6omu; 7kxp; 6nfh; 5p9i; 5vfi; 5p9k; 5u9d; 6n9p; 4z3v; 5p9m; 6di5; 6di1; 6di0; 7n5y; 7n5r; 8e2m; 8ejb; 6e4f; 7kxq; 7n5o; 4zly; 4zlz; 4yhf; 7n5x; 3pix; 7l5p; 6w06; 6x3o; 7l5o; 8flv; 7kxl; 6j6m; 5p9f; 8flh; 7r61; 6x3p; 7kxn; 4ot6; 5bq0; 7kxo; 6bkw; 7ltz; 5p9g; 3gen; 8fll; 6nzm; 5p9h; 6w07; 4rx5; 5vgo; 7yc9; 5kup; 6w8i; 6bln; 6w7o; 4ot5; 6ep9; 5zz4; 6hr…
					5-(1-ethoxyisoquinolin-3-yl)-2,4-dihydro-3h-1,2,4-triazol-3-one	bound	0GW	6.19435	1	7n5x	1	85	8gmb; 4y93; 8s93; 4xi2; 5j87; 6tfp; 7r60; 7kxm; 6omu; 7kxp; 6nfh; 5p9i; 5vfi; 5p9k; 5u9d; 6n9p; 4z3v; 5p9m; 6di5; 6di1; 6di0; 7n5y; 7n5r; 8e2m; 8ejb; 6e4f; 7kxq; 7n5o; 4zly; 4zlz; 4yhf; 7n5x; 3pix; 7l5p; 6w06; 6x3o; 7l5o; 8flv; 7kxl; 6j6m; 5p9f; 8flh; 7r61; 6x3p; 7kxn; 4ot6; 5bq0; 7kxo; 6bkw; 7ltz; 5p9g; 3gen; 8fll; 6nzm; 5p9h; 6w07; 4rx5; 5vgo; 7yc9; 5kup; 6w8i; 6bln; 6w7o; 4ot5; 6ep9; 5zz4; 6hr…	85	8gmb; 4y93; 8s93; 4xi2; 5j87; 6tfp; 7r60; 7kxm; 6omu; 7kxp; 6nfh; 5p9i; 5vfi; 5p9k; 5u9d; 6n9p; 4z3v; 5p9m; 6di5; 6di1; 6di0; 7n5y; 7n5r; 8e2m; 8ejb; 6e4f; 7kxq; 7n5o; 4zly; 4zlz; 4yhf; 7n5x; 3pix; 7l5p; 6w06; 6x3o; 7l5o; 8flv; 7kxl; 6j6m; 5p9f; 8flh; 7r61; 6x3p; 7kxn; 4ot6; 5bq0; 7kxo; 6bkw; 7ltz; 5p9g; 3gen; 8fll; 6nzm; 5p9h; 6w07; 4rx5; 5vgo; 7yc9; 5kup; 6w8i; 6bln; 6w7o; 4ot5; 6ep9; 5zz4; 6hr…
					5-(1-{[(3s)-1-propanoylpyrrolidin-3-yl]oxy}isoquinolin-3-yl)-2,4-dihydro-3h-1,2,4-triazol-3-one	bound	0CI	6.2313	1	7n5y	1	85	8gmb; 4y93; 8s93; 4xi2; 5j87; 6tfp; 7r60; 7kxm; 6omu; 7kxp; 6nfh; 5p9i; 5vfi; 5p9k; 5u9d; 6n9p; 4z3v; 5p9m; 6di5; 6di1; 6di0; 7n5y; 7n5r; 8e2m; 8ejb; 6e4f; 7kxq; 7n5o; 4zly; 4zlz; 4yhf; 7n5x; 3pix; 7l5p; 6w06; 6x3o; 7l5o; 8flv; 7kxl; 6j6m; 5p9f; 8flh; 7r61; 6x3p; 7kxn; 4ot6; 5bq0; 7kxo; 6bkw; 7ltz; 5p9g; 3gen; 8fll; 6nzm; 5p9h; 6w07; 4rx5; 5vgo; 7yc9; 5kup; 6w8i; 6bln; 6w7o; 4ot5; 6ep9; 5zz4; 6hr…	85	8gmb; 4y93; 8s93; 4xi2; 5j87; 6tfp; 7r60; 7kxm; 6omu; 7kxp; 6nfh; 5p9i; 5vfi; 5p9k; 5u9d; 6n9p; 4z3v; 5p9m; 6di5; 6di1; 6di0; 7n5y; 7n5r; 8e2m; 8ejb; 6e4f; 7kxq; 7n5o; 4zly; 4zlz; 4yhf; 7n5x; 3pix; 7l5p; 6w06; 6x3o; 7l5o; 8flv; 7kxl; 6j6m; 5p9f; 8flh; 7r61; 6x3p; 7kxn; 4ot6; 5bq0; 7kxo; 6bkw; 7ltz; 5p9g; 3gen; 8fll; 6nzm; 5p9h; 6w07; 4rx5; 5vgo; 7yc9; 5kup; 6w8i; 6bln; 6w7o; 4ot5; 6ep9; 5zz4; 6hr…
					5-(1h-benzimidazol-2-yl)-2,4-dihydro-3h-1,2,4-triazol-3-one	bound	0BQ	6.15882	1	7n5o	1	85	8gmb; 4y93; 8s93; 4xi2; 5j87; 6tfp; 7r60; 7kxm; 6omu; 7kxp; 6nfh; 5p9i; 5vfi; 5p9k; 5u9d; 6n9p; 4z3v; 5p9m; 6di5; 6di1; 6di0; 7n5y; 7n5r; 8e2m; 8ejb; 6e4f; 7kxq; 7n5o; 4zly; 4zlz; 4yhf; 7n5x; 3pix; 7l5p; 6w06; 6x3o; 7l5o; 8flv; 7kxl; 6j6m; 5p9f; 8flh; 7r61; 6x3p; 7kxn; 4ot6; 5bq0; 7kxo; 6bkw; 7ltz; 5p9g; 3gen; 8fll; 6nzm; 5p9h; 6w07; 4rx5; 5vgo; 7yc9; 5kup; 6w8i; 6bln; 6w7o; 4ot5; 6ep9; 5zz4; 6hr…	85	8gmb; 4y93; 8s93; 4xi2; 5j87; 6tfp; 7r60; 7kxm; 6omu; 7kxp; 6nfh; 5p9i; 5vfi; 5p9k; 5u9d; 6n9p; 4z3v; 5p9m; 6di5; 6di1; 6di0; 7n5y; 7n5r; 8e2m; 8ejb; 6e4f; 7kxq; 7n5o; 4zly; 4zlz; 4yhf; 7n5x; 3pix; 7l5p; 6w06; 6x3o; 7l5o; 8flv; 7kxl; 6j6m; 5p9f; 8flh; 7r61; 6x3p; 7kxn; 4ot6; 5bq0; 7kxo; 6bkw; 7ltz; 5p9g; 3gen; 8fll; 6nzm; 5p9h; 6w07; 4rx5; 5vgo; 7yc9; 5kup; 6w8i; 6bln; 6w7o; 4ot5; 6ep9; 5zz4; 6hr…
					5-[(3r)-3-(3-methyl-2-oxoimidazolidin-1-yl)piperidin-1-yl]-3-[4-(piperidin-4-yl)anilino]pyrazine-2-carboxamide	bound	WKC	6.16121	1	8ejb	1	85	8gmb; 4y93; 8s93; 4xi2; 5j87; 6tfp; 7r60; 7kxm; 6omu; 7kxp; 6nfh; 5p9i; 5vfi; 5p9k; 5u9d; 6n9p; 4z3v; 5p9m; 6di5; 6di1; 6di0; 7n5y; 7n5r; 8e2m; 8ejb; 6e4f; 7kxq; 7n5o; 4zly; 4zlz; 4yhf; 7n5x; 3pix; 7l5p; 6w06; 6x3o; 7l5o; 8flv; 7kxl; 6j6m; 5p9f; 8flh; 7r61; 6x3p; 7kxn; 4ot6; 5bq0; 7kxo; 6bkw; 7ltz; 5p9g; 3gen; 8fll; 6nzm; 5p9h; 6w07; 4rx5; 5vgo; 7yc9; 5kup; 6w8i; 6bln; 6w7o; 4ot5; 6ep9; 5zz4; 6hr…	85	8gmb; 4y93; 8s93; 4xi2; 5j87; 6tfp; 7r60; 7kxm; 6omu; 7kxp; 6nfh; 5p9i; 5vfi; 5p9k; 5u9d; 6n9p; 4z3v; 5p9m; 6di5; 6di1; 6di0; 7n5y; 7n5r; 8e2m; 8ejb; 6e4f; 7kxq; 7n5o; 4zly; 4zlz; 4yhf; 7n5x; 3pix; 7l5p; 6w06; 6x3o; 7l5o; 8flv; 7kxl; 6j6m; 5p9f; 8flh; 7r61; 6x3p; 7kxn; 4ot6; 5bq0; 7kxo; 6bkw; 7ltz; 5p9g; 3gen; 8fll; 6nzm; 5p9h; 6w07; 4rx5; 5vgo; 7yc9; 5kup; 6w8i; 6bln; 6w7o; 4ot5; 6ep9; 5zz4; 6hr…
					5-phenyl-2,4-dihydro-3h-1,2,4-triazol-3-one	bound	0UW	6.13528	1	7n5r	1	85	8gmb; 4y93; 8s93; 4xi2; 5j87; 6tfp; 7r60; 7kxm; 6omu; 7kxp; 6nfh; 5p9i; 5vfi; 5p9k; 5u9d; 6n9p; 4z3v; 5p9m; 6di5; 6di1; 6di0; 7n5y; 7n5r; 8e2m; 8ejb; 6e4f; 7kxq; 7n5o; 4zly; 4zlz; 4yhf; 7n5x; 3pix; 7l5p; 6w06; 6x3o; 7l5o; 8flv; 7kxl; 6j6m; 5p9f; 8flh; 7r61; 6x3p; 7kxn; 4ot6; 5bq0; 7kxo; 6bkw; 7ltz; 5p9g; 3gen; 8fll; 6nzm; 5p9h; 6w07; 4rx5; 5vgo; 7yc9; 5kup; 6w8i; 6bln; 6w7o; 4ot5; 6ep9; 5zz4; 6hr…	85	8gmb; 4y93; 8s93; 4xi2; 5j87; 6tfp; 7r60; 7kxm; 6omu; 7kxp; 6nfh; 5p9i; 5vfi; 5p9k; 5u9d; 6n9p; 4z3v; 5p9m; 6di5; 6di1; 6di0; 7n5y; 7n5r; 8e2m; 8ejb; 6e4f; 7kxq; 7n5o; 4zly; 4zlz; 4yhf; 7n5x; 3pix; 7l5p; 6w06; 6x3o; 7l5o; 8flv; 7kxl; 6j6m; 5p9f; 8flh; 7r61; 6x3p; 7kxn; 4ot6; 5bq0; 7kxo; 6bkw; 7ltz; 5p9g; 3gen; 8fll; 6nzm; 5p9h; 6w07; 4rx5; 5vgo; 7yc9; 5kup; 6w8i; 6bln; 6w7o; 4ot5; 6ep9; 5zz4; 6hr…
					5-{(3s)-1-[(z)-iminomethyl]piperidin-3-yl}-2-(4-phenoxyphenoxy)pyridine-3-carboxamide	bound	2IJ	5.99067	1	7r61	1	85	8gmb; 4y93; 8s93; 4xi2; 5j87; 6tfp; 7r60; 7kxm; 6omu; 7kxp; 6nfh; 5p9i; 5vfi; 5p9k; 5u9d; 6n9p; 4z3v; 5p9m; 6di5; 6di1; 6di0; 7n5y; 7n5r; 8e2m; 8ejb; 6e4f; 7kxq; 7n5o; 4zly; 4zlz; 4yhf; 7n5x; 3pix; 7l5p; 6w06; 6x3o; 7l5o; 8flv; 7kxl; 6j6m; 5p9f; 8flh; 7r61; 6x3p; 7kxn; 4ot6; 5bq0; 7kxo; 6bkw; 7ltz; 5p9g; 3gen; 8fll; 6nzm; 5p9h; 6w07; 4rx5; 5vgo; 7yc9; 5kup; 6w8i; 6bln; 6w7o; 4ot5; 6ep9; 5zz4; 6hr…	85	8gmb; 4y93; 8s93; 4xi2; 5j87; 6tfp; 7r60; 7kxm; 6omu; 7kxp; 6nfh; 5p9i; 5vfi; 5p9k; 5u9d; 6n9p; 4z3v; 5p9m; 6di5; 6di1; 6di0; 7n5y; 7n5r; 8e2m; 8ejb; 6e4f; 7kxq; 7n5o; 4zly; 4zlz; 4yhf; 7n5x; 3pix; 7l5p; 6w06; 6x3o; 7l5o; 8flv; 7kxl; 6j6m; 5p9f; 8flh; 7r61; 6x3p; 7kxn; 4ot6; 5bq0; 7kxo; 6bkw; 7ltz; 5p9g; 3gen; 8fll; 6nzm; 5p9h; 6w07; 4rx5; 5vgo; 7yc9; 5kup; 6w8i; 6bln; 6w7o; 4ot5; 6ep9; 5zz4; 6hr…
					6-(cyclohexylamino)pyridine-3-carboxamide	bound	GJG	5.70388	1	6di0	1	85	8gmb; 4y93; 8s93; 4xi2; 5j87; 6tfp; 7r60; 7kxm; 6omu; 7kxp; 6nfh; 5p9i; 5vfi; 5p9k; 5u9d; 6n9p; 4z3v; 5p9m; 6di5; 6di1; 6di0; 7n5y; 7n5r; 8e2m; 8ejb; 6e4f; 7kxq; 7n5o; 4zly; 4zlz; 4yhf; 7n5x; 3pix; 7l5p; 6w06; 6x3o; 7l5o; 8flv; 7kxl; 6j6m; 5p9f; 8flh; 7r61; 6x3p; 7kxn; 4ot6; 5bq0; 7kxo; 6bkw; 7ltz; 5p9g; 3gen; 8fll; 6nzm; 5p9h; 6w07; 4rx5; 5vgo; 7yc9; 5kup; 6w8i; 6bln; 6w7o; 4ot5; 6ep9; 5zz4; 6hr…	85	8gmb; 4y93; 8s93; 4xi2; 5j87; 6tfp; 7r60; 7kxm; 6omu; 7kxp; 6nfh; 5p9i; 5vfi; 5p9k; 5u9d; 6n9p; 4z3v; 5p9m; 6di5; 6di1; 6di0; 7n5y; 7n5r; 8e2m; 8ejb; 6e4f; 7kxq; 7n5o; 4zly; 4zlz; 4yhf; 7n5x; 3pix; 7l5p; 6w06; 6x3o; 7l5o; 8flv; 7kxl; 6j6m; 5p9f; 8flh; 7r61; 6x3p; 7kxn; 4ot6; 5bq0; 7kxo; 6bkw; 7ltz; 5p9g; 3gen; 8fll; 6nzm; 5p9h; 6w07; 4rx5; 5vgo; 7yc9; 5kup; 6w8i; 6bln; 6w7o; 4ot5; 6ep9; 5zz4; 6hr…
					6-(dimethylamino)-2-[2-(hydroxymethyl)-3-(1-methyl-5-{[5-(morpholin-4-ylcarbonyl)pyridin-2-yl]amino}-6-oxo-1,6-dihydropyridin-3-yl)phenyl]-3,4-dihydroisoquinolin-1(2h)-one	bound	3OU	6.24494	1	4rfy	1	85	8gmb; 4y93; 8s93; 4xi2; 5j87; 6tfp; 7r60; 7kxm; 6omu; 7kxp; 6nfh; 5p9i; 5vfi; 5p9k; 5u9d; 6n9p; 4z3v; 5p9m; 6di5; 6di1; 6di0; 7n5y; 7n5r; 8e2m; 8ejb; 6e4f; 7kxq; 7n5o; 4zly; 4zlz; 4yhf; 7n5x; 3pix; 7l5p; 6w06; 6x3o; 7l5o; 8flv; 7kxl; 6j6m; 5p9f; 8flh; 7r61; 6x3p; 7kxn; 4ot6; 5bq0; 7kxo; 6bkw; 7ltz; 5p9g; 3gen; 8fll; 6nzm; 5p9h; 6w07; 4rx5; 5vgo; 7yc9; 5kup; 6w8i; 6bln; 6w7o; 4ot5; 6ep9; 5zz4; 6hr…	85	8gmb; 4y93; 8s93; 4xi2; 5j87; 6tfp; 7r60; 7kxm; 6omu; 7kxp; 6nfh; 5p9i; 5vfi; 5p9k; 5u9d; 6n9p; 4z3v; 5p9m; 6di5; 6di1; 6di0; 7n5y; 7n5r; 8e2m; 8ejb; 6e4f; 7kxq; 7n5o; 4zly; 4zlz; 4yhf; 7n5x; 3pix; 7l5p; 6w06; 6x3o; 7l5o; 8flv; 7kxl; 6j6m; 5p9f; 8flh; 7r61; 6x3p; 7kxn; 4ot6; 5bq0; 7kxo; 6bkw; 7ltz; 5p9g; 3gen; 8fll; 6nzm; 5p9h; 6w07; 4rx5; 5vgo; 7yc9; 5kup; 6w8i; 6bln; 6w7o; 4ot5; 6ep9; 5zz4; 6hr…
					6-(dimethylamino)-8-fluoro-2-[2-(hydroxymethyl)-3-(1-methyl-5-{[5-(morpholin-4-ylcarbonyl)pyridin-2-yl]amino}-6-oxo-1,6-dihydropyridin-3-yl)phenyl]isoquinolin-1(2h)-one	bound	3OV	6.28028	1	4rfz	1	85	8gmb; 4y93; 8s93; 4xi2; 5j87; 6tfp; 7r60; 7kxm; 6omu; 7kxp; 6nfh; 5p9i; 5vfi; 5p9k; 5u9d; 6n9p; 4z3v; 5p9m; 6di5; 6di1; 6di0; 7n5y; 7n5r; 8e2m; 8ejb; 6e4f; 7kxq; 7n5o; 4zly; 4zlz; 4yhf; 7n5x; 3pix; 7l5p; 6w06; 6x3o; 7l5o; 8flv; 7kxl; 6j6m; 5p9f; 8flh; 7r61; 6x3p; 7kxn; 4ot6; 5bq0; 7kxo; 6bkw; 7ltz; 5p9g; 3gen; 8fll; 6nzm; 5p9h; 6w07; 4rx5; 5vgo; 7yc9; 5kup; 6w8i; 6bln; 6w7o; 4ot5; 6ep9; 5zz4; 6hr…	85	8gmb; 4y93; 8s93; 4xi2; 5j87; 6tfp; 7r60; 7kxm; 6omu; 7kxp; 6nfh; 5p9i; 5vfi; 5p9k; 5u9d; 6n9p; 4z3v; 5p9m; 6di5; 6di1; 6di0; 7n5y; 7n5r; 8e2m; 8ejb; 6e4f; 7kxq; 7n5o; 4zly; 4zlz; 4yhf; 7n5x; 3pix; 7l5p; 6w06; 6x3o; 7l5o; 8flv; 7kxl; 6j6m; 5p9f; 8flh; 7r61; 6x3p; 7kxn; 4ot6; 5bq0; 7kxo; 6bkw; 7ltz; 5p9g; 3gen; 8fll; 6nzm; 5p9h; 6w07; 4rx5; 5vgo; 7yc9; 5kup; 6w8i; 6bln; 6w7o; 4ot5; 6ep9; 5zz4; 6hr…
					6-({5-fluoro-2-[(3,4,5-trimethoxyphenyl)amino]pyrimidin-4-yl}amino)-2,2-dimethyl-2h-pyrido[3,2-b][1,4]oxazin-3(4h)-one	bound	585	6.10278	1	3piy	1	85	8gmb; 4y93; 8s93; 4xi2; 5j87; 6tfp; 7r60; 7kxm; 6omu; 7kxp; 6nfh; 5p9i; 5vfi; 5p9k; 5u9d; 6n9p; 4z3v; 5p9m; 6di5; 6di1; 6di0; 7n5y; 7n5r; 8e2m; 8ejb; 6e4f; 7kxq; 7n5o; 4zly; 4zlz; 4yhf; 7n5x; 3pix; 7l5p; 6w06; 6x3o; 7l5o; 8flv; 7kxl; 6j6m; 5p9f; 8flh; 7r61; 6x3p; 7kxn; 4ot6; 5bq0; 7kxo; 6bkw; 7ltz; 5p9g; 3gen; 8fll; 6nzm; 5p9h; 6w07; 4rx5; 5vgo; 7yc9; 5kup; 6w8i; 6bln; 6w7o; 4ot5; 6ep9; 5zz4; 6hr…	85	8gmb; 4y93; 8s93; 4xi2; 5j87; 6tfp; 7r60; 7kxm; 6omu; 7kxp; 6nfh; 5p9i; 5vfi; 5p9k; 5u9d; 6n9p; 4z3v; 5p9m; 6di5; 6di1; 6di0; 7n5y; 7n5r; 8e2m; 8ejb; 6e4f; 7kxq; 7n5o; 4zly; 4zlz; 4yhf; 7n5x; 3pix; 7l5p; 6w06; 6x3o; 7l5o; 8flv; 7kxl; 6j6m; 5p9f; 8flh; 7r61; 6x3p; 7kxn; 4ot6; 5bq0; 7kxo; 6bkw; 7ltz; 5p9g; 3gen; 8fll; 6nzm; 5p9h; 6w07; 4rx5; 5vgo; 7yc9; 5kup; 6w8i; 6bln; 6w7o; 4ot5; 6ep9; 5zz4; 6hr…
					6-azanyl-9-[(3~{r})-1-[(~{e})-but-2-enoyl]pyrrolidin-3-yl]-7-(4-phenoxyphenyl)purin-8-one	bound	7GB	6.19465	1	5p9m	1	85	8gmb; 4y93; 8s93; 4xi2; 5j87; 6tfp; 7r60; 7kxm; 6omu; 7kxp; 6nfh; 5p9i; 5vfi; 5p9k; 5u9d; 6n9p; 4z3v; 5p9m; 6di5; 6di1; 6di0; 7n5y; 7n5r; 8e2m; 8ejb; 6e4f; 7kxq; 7n5o; 4zly; 4zlz; 4yhf; 7n5x; 3pix; 7l5p; 6w06; 6x3o; 7l5o; 8flv; 7kxl; 6j6m; 5p9f; 8flh; 7r61; 6x3p; 7kxn; 4ot6; 5bq0; 7kxo; 6bkw; 7ltz; 5p9g; 3gen; 8fll; 6nzm; 5p9h; 6w07; 4rx5; 5vgo; 7yc9; 5kup; 6w8i; 6bln; 6w7o; 4ot5; 6ep9; 5zz4; 6hr…	85	8gmb; 4y93; 8s93; 4xi2; 5j87; 6tfp; 7r60; 7kxm; 6omu; 7kxp; 6nfh; 5p9i; 5vfi; 5p9k; 5u9d; 6n9p; 4z3v; 5p9m; 6di5; 6di1; 6di0; 7n5y; 7n5r; 8e2m; 8ejb; 6e4f; 7kxq; 7n5o; 4zly; 4zlz; 4yhf; 7n5x; 3pix; 7l5p; 6w06; 6x3o; 7l5o; 8flv; 7kxl; 6j6m; 5p9f; 8flh; 7r61; 6x3p; 7kxn; 4ot6; 5bq0; 7kxo; 6bkw; 7ltz; 5p9g; 3gen; 8fll; 6nzm; 5p9h; 6w07; 4rx5; 5vgo; 7yc9; 5kup; 6w8i; 6bln; 6w7o; 4ot5; 6ep9; 5zz4; 6hr…
					6-cyclopropyl-2-[3-(5-{[5-(4-ethylpiperazin-1-yl)pyridin-2-yl]amino}-1-methyl-6-oxo-1,6-dihydropyridin-3-yl)-2-(hydroxymethyl)phenyl]-8-fluoroisoquinolin-1(2h)-one	bound	2V3	6.30803	1	4otr	1	85	8gmb; 4y93; 8s93; 4xi2; 5j87; 6tfp; 7r60; 7kxm; 6omu; 7kxp; 6nfh; 5p9i; 5vfi; 5p9k; 5u9d; 6n9p; 4z3v; 5p9m; 6di5; 6di1; 6di0; 7n5y; 7n5r; 8e2m; 8ejb; 6e4f; 7kxq; 7n5o; 4zly; 4zlz; 4yhf; 7n5x; 3pix; 7l5p; 6w06; 6x3o; 7l5o; 8flv; 7kxl; 6j6m; 5p9f; 8flh; 7r61; 6x3p; 7kxn; 4ot6; 5bq0; 7kxo; 6bkw; 7ltz; 5p9g; 3gen; 8fll; 6nzm; 5p9h; 6w07; 4rx5; 5vgo; 7yc9; 5kup; 6w8i; 6bln; 6w7o; 4ot5; 6ep9; 5zz4; 6hr…	85	8gmb; 4y93; 8s93; 4xi2; 5j87; 6tfp; 7r60; 7kxm; 6omu; 7kxp; 6nfh; 5p9i; 5vfi; 5p9k; 5u9d; 6n9p; 4z3v; 5p9m; 6di5; 6di1; 6di0; 7n5y; 7n5r; 8e2m; 8ejb; 6e4f; 7kxq; 7n5o; 4zly; 4zlz; 4yhf; 7n5x; 3pix; 7l5p; 6w06; 6x3o; 7l5o; 8flv; 7kxl; 6j6m; 5p9f; 8flh; 7r61; 6x3p; 7kxn; 4ot6; 5bq0; 7kxo; 6bkw; 7ltz; 5p9g; 3gen; 8fll; 6nzm; 5p9h; 6w07; 4rx5; 5vgo; 7yc9; 5kup; 6w8i; 6bln; 6w7o; 4ot5; 6ep9; 5zz4; 6hr…
					6-cyclopropyl-8-fluoranyl-2-[2-(hydroxymethyl)-3-[1-methyl-5-[[5-(4-methylpiperazin-1-yl)pyridin-2-yl]amino]-6-oxidanylidene-pyridin-3-yl]phenyl]isoquinolin-1-one	bound	7G6	6.44618	1	5p9g	1	85	8gmb; 4y93; 8s93; 4xi2; 5j87; 6tfp; 7r60; 7kxm; 6omu; 7kxp; 6nfh; 5p9i; 5vfi; 5p9k; 5u9d; 6n9p; 4z3v; 5p9m; 6di5; 6di1; 6di0; 7n5y; 7n5r; 8e2m; 8ejb; 6e4f; 7kxq; 7n5o; 4zly; 4zlz; 4yhf; 7n5x; 3pix; 7l5p; 6w06; 6x3o; 7l5o; 8flv; 7kxl; 6j6m; 5p9f; 8flh; 7r61; 6x3p; 7kxn; 4ot6; 5bq0; 7kxo; 6bkw; 7ltz; 5p9g; 3gen; 8fll; 6nzm; 5p9h; 6w07; 4rx5; 5vgo; 7yc9; 5kup; 6w8i; 6bln; 6w7o; 4ot5; 6ep9; 5zz4; 6hr…	85	8gmb; 4y93; 8s93; 4xi2; 5j87; 6tfp; 7r60; 7kxm; 6omu; 7kxp; 6nfh; 5p9i; 5vfi; 5p9k; 5u9d; 6n9p; 4z3v; 5p9m; 6di5; 6di1; 6di0; 7n5y; 7n5r; 8e2m; 8ejb; 6e4f; 7kxq; 7n5o; 4zly; 4zlz; 4yhf; 7n5x; 3pix; 7l5p; 6w06; 6x3o; 7l5o; 8flv; 7kxl; 6j6m; 5p9f; 8flh; 7r61; 6x3p; 7kxn; 4ot6; 5bq0; 7kxo; 6bkw; 7ltz; 5p9g; 3gen; 8fll; 6nzm; 5p9h; 6w07; 4rx5; 5vgo; 7yc9; 5kup; 6w8i; 6bln; 6w7o; 4ot5; 6ep9; 5zz4; 6hr…
					6-~{tert}-butyl-8-fluoranyl-2-[2-(hydroxymethyl)-3-[1-methyl-5-[(5-morpholin-4-ylcarbonylpyridin-2-yl)amino]-6-oxidanylidene-pyridazin-3-yl]phenyl]phthalazin-1-one	bound	GMQ	6.19996	1	6hrp	1	85	8gmb; 4y93; 8s93; 4xi2; 5j87; 6tfp; 7r60; 7kxm; 6omu; 7kxp; 6nfh; 5p9i; 5vfi; 5p9k; 5u9d; 6n9p; 4z3v; 5p9m; 6di5; 6di1; 6di0; 7n5y; 7n5r; 8e2m; 8ejb; 6e4f; 7kxq; 7n5o; 4zly; 4zlz; 4yhf; 7n5x; 3pix; 7l5p; 6w06; 6x3o; 7l5o; 8flv; 7kxl; 6j6m; 5p9f; 8flh; 7r61; 6x3p; 7kxn; 4ot6; 5bq0; 7kxo; 6bkw; 7ltz; 5p9g; 3gen; 8fll; 6nzm; 5p9h; 6w07; 4rx5; 5vgo; 7yc9; 5kup; 6w8i; 6bln; 6w7o; 4ot5; 6ep9; 5zz4; 6hr…	85	8gmb; 4y93; 8s93; 4xi2; 5j87; 6tfp; 7r60; 7kxm; 6omu; 7kxp; 6nfh; 5p9i; 5vfi; 5p9k; 5u9d; 6n9p; 4z3v; 5p9m; 6di5; 6di1; 6di0; 7n5y; 7n5r; 8e2m; 8ejb; 6e4f; 7kxq; 7n5o; 4zly; 4zlz; 4yhf; 7n5x; 3pix; 7l5p; 6w06; 6x3o; 7l5o; 8flv; 7kxl; 6j6m; 5p9f; 8flh; 7r61; 6x3p; 7kxn; 4ot6; 5bq0; 7kxo; 6bkw; 7ltz; 5p9g; 3gen; 8fll; 6nzm; 5p9h; 6w07; 4rx5; 5vgo; 7yc9; 5kup; 6w8i; 6bln; 6w7o; 4ot5; 6ep9; 5zz4; 6hr…
					6-~{tert}-butyl-8-fluoranyl-2-[3-(hydroxymethyl)-4-[1-methyl-5-[[5-(1-methylpiperidin-4-yl)pyridin-2-yl]amino]-6-oxidanylidene-pyridazin-3-yl]pyridin-2-yl]phthalazin-1-one	bound	7G7	6.36758	1	5p9h	1	85	8gmb; 4y93; 8s93; 4xi2; 5j87; 6tfp; 7r60; 7kxm; 6omu; 7kxp; 6nfh; 5p9i; 5vfi; 5p9k; 5u9d; 6n9p; 4z3v; 5p9m; 6di5; 6di1; 6di0; 7n5y; 7n5r; 8e2m; 8ejb; 6e4f; 7kxq; 7n5o; 4zly; 4zlz; 4yhf; 7n5x; 3pix; 7l5p; 6w06; 6x3o; 7l5o; 8flv; 7kxl; 6j6m; 5p9f; 8flh; 7r61; 6x3p; 7kxn; 4ot6; 5bq0; 7kxo; 6bkw; 7ltz; 5p9g; 3gen; 8fll; 6nzm; 5p9h; 6w07; 4rx5; 5vgo; 7yc9; 5kup; 6w8i; 6bln; 6w7o; 4ot5; 6ep9; 5zz4; 6hr…	85	8gmb; 4y93; 8s93; 4xi2; 5j87; 6tfp; 7r60; 7kxm; 6omu; 7kxp; 6nfh; 5p9i; 5vfi; 5p9k; 5u9d; 6n9p; 4z3v; 5p9m; 6di5; 6di1; 6di0; 7n5y; 7n5r; 8e2m; 8ejb; 6e4f; 7kxq; 7n5o; 4zly; 4zlz; 4yhf; 7n5x; 3pix; 7l5p; 6w06; 6x3o; 7l5o; 8flv; 7kxl; 6j6m; 5p9f; 8flh; 7r61; 6x3p; 7kxn; 4ot6; 5bq0; 7kxo; 6bkw; 7ltz; 5p9g; 3gen; 8fll; 6nzm; 5p9h; 6w07; 4rx5; 5vgo; 7yc9; 5kup; 6w8i; 6bln; 6w7o; 4ot5; 6ep9; 5zz4; 6hr…
					6-~{tert}-butyl-8-fluoranyl-2-[3-(hydroxymethyl)-4-[1-methyl-6-oxidanylidene-5-(pyrimidin-4-ylamino)pyridin-3-yl]pyridin-2-yl]phthalazin-1-one	bound	6XL	6.3328	1	5kup	1	85	8gmb; 4y93; 8s93; 4xi2; 5j87; 6tfp; 7r60; 7kxm; 6omu; 7kxp; 6nfh; 5p9i; 5vfi; 5p9k; 5u9d; 6n9p; 4z3v; 5p9m; 6di5; 6di1; 6di0; 7n5y; 7n5r; 8e2m; 8ejb; 6e4f; 7kxq; 7n5o; 4zly; 4zlz; 4yhf; 7n5x; 3pix; 7l5p; 6w06; 6x3o; 7l5o; 8flv; 7kxl; 6j6m; 5p9f; 8flh; 7r61; 6x3p; 7kxn; 4ot6; 5bq0; 7kxo; 6bkw; 7ltz; 5p9g; 3gen; 8fll; 6nzm; 5p9h; 6w07; 4rx5; 5vgo; 7yc9; 5kup; 6w8i; 6bln; 6w7o; 4ot5; 6ep9; 5zz4; 6hr…	85	8gmb; 4y93; 8s93; 4xi2; 5j87; 6tfp; 7r60; 7kxm; 6omu; 7kxp; 6nfh; 5p9i; 5vfi; 5p9k; 5u9d; 6n9p; 4z3v; 5p9m; 6di5; 6di1; 6di0; 7n5y; 7n5r; 8e2m; 8ejb; 6e4f; 7kxq; 7n5o; 4zly; 4zlz; 4yhf; 7n5x; 3pix; 7l5p; 6w06; 6x3o; 7l5o; 8flv; 7kxl; 6j6m; 5p9f; 8flh; 7r61; 6x3p; 7kxn; 4ot6; 5bq0; 7kxo; 6bkw; 7ltz; 5p9g; 3gen; 8fll; 6nzm; 5p9h; 6w07; 4rx5; 5vgo; 7yc9; 5kup; 6w8i; 6bln; 6w7o; 4ot5; 6ep9; 5zz4; 6hr…
					7-(4-methylpiperazin-1-yl)-4-[(5-methyl-1h-pyrazol-3-yl)amino]-2-(propan-2-yl)phthalazin-1(2h)-one	bound	027	5.95435	1	3pix	1	85	8gmb; 4y93; 8s93; 4xi2; 5j87; 6tfp; 7r60; 7kxm; 6omu; 7kxp; 6nfh; 5p9i; 5vfi; 5p9k; 5u9d; 6n9p; 4z3v; 5p9m; 6di5; 6di1; 6di0; 7n5y; 7n5r; 8e2m; 8ejb; 6e4f; 7kxq; 7n5o; 4zly; 4zlz; 4yhf; 7n5x; 3pix; 7l5p; 6w06; 6x3o; 7l5o; 8flv; 7kxl; 6j6m; 5p9f; 8flh; 7r61; 6x3p; 7kxn; 4ot6; 5bq0; 7kxo; 6bkw; 7ltz; 5p9g; 3gen; 8fll; 6nzm; 5p9h; 6w07; 4rx5; 5vgo; 7yc9; 5kup; 6w8i; 6bln; 6w7o; 4ot5; 6ep9; 5zz4; 6hr…	85	8gmb; 4y93; 8s93; 4xi2; 5j87; 6tfp; 7r60; 7kxm; 6omu; 7kxp; 6nfh; 5p9i; 5vfi; 5p9k; 5u9d; 6n9p; 4z3v; 5p9m; 6di5; 6di1; 6di0; 7n5y; 7n5r; 8e2m; 8ejb; 6e4f; 7kxq; 7n5o; 4zly; 4zlz; 4yhf; 7n5x; 3pix; 7l5p; 6w06; 6x3o; 7l5o; 8flv; 7kxl; 6j6m; 5p9f; 8flh; 7r61; 6x3p; 7kxn; 4ot6; 5bq0; 7kxo; 6bkw; 7ltz; 5p9g; 3gen; 8fll; 6nzm; 5p9h; 6w07; 4rx5; 5vgo; 7yc9; 5kup; 6w8i; 6bln; 6w7o; 4ot5; 6ep9; 5zz4; 6hr…
					8-(2,3-dihydro-1h-inden-5-yl)-2-({4-[(2s)-3-(dimethylamino)-2-hydroxypropoxy]phenyl}amino)-5,8-dihydropteridine-6,7-dione	bound	KLM	6.20843	1	6nfh	1	85	8gmb; 4y93; 8s93; 4xi2; 5j87; 6tfp; 7r60; 7kxm; 6omu; 7kxp; 6nfh; 5p9i; 5vfi; 5p9k; 5u9d; 6n9p; 4z3v; 5p9m; 6di5; 6di1; 6di0; 7n5y; 7n5r; 8e2m; 8ejb; 6e4f; 7kxq; 7n5o; 4zly; 4zlz; 4yhf; 7n5x; 3pix; 7l5p; 6w06; 6x3o; 7l5o; 8flv; 7kxl; 6j6m; 5p9f; 8flh; 7r61; 6x3p; 7kxn; 4ot6; 5bq0; 7kxo; 6bkw; 7ltz; 5p9g; 3gen; 8fll; 6nzm; 5p9h; 6w07; 4rx5; 5vgo; 7yc9; 5kup; 6w8i; 6bln; 6w7o; 4ot5; 6ep9; 5zz4; 6hr…	85	8gmb; 4y93; 8s93; 4xi2; 5j87; 6tfp; 7r60; 7kxm; 6omu; 7kxp; 6nfh; 5p9i; 5vfi; 5p9k; 5u9d; 6n9p; 4z3v; 5p9m; 6di5; 6di1; 6di0; 7n5y; 7n5r; 8e2m; 8ejb; 6e4f; 7kxq; 7n5o; 4zly; 4zlz; 4yhf; 7n5x; 3pix; 7l5p; 6w06; 6x3o; 7l5o; 8flv; 7kxl; 6j6m; 5p9f; 8flh; 7r61; 6x3p; 7kxn; 4ot6; 5bq0; 7kxo; 6bkw; 7ltz; 5p9g; 3gen; 8fll; 6nzm; 5p9h; 6w07; 4rx5; 5vgo; 7yc9; 5kup; 6w8i; 6bln; 6w7o; 4ot5; 6ep9; 5zz4; 6hr…
					chloride ion	bound	CL	4.45317	1	6omu	1	85	8gmb; 4y93; 8s93; 4xi2; 5j87; 6tfp; 7r60; 7kxm; 6omu; 7kxp; 6nfh; 5p9i; 5vfi; 5p9k; 5u9d; 6n9p; 4z3v; 5p9m; 6di5; 6di1; 6di0; 7n5y; 7n5r; 8e2m; 8ejb; 6e4f; 7kxq; 7n5o; 4zly; 4zlz; 4yhf; 7n5x; 3pix; 7l5p; 6w06; 6x3o; 7l5o; 8flv; 7kxl; 6j6m; 5p9f; 8flh; 7r61; 6x3p; 7kxn; 4ot6; 5bq0; 7kxo; 6bkw; 7ltz; 5p9g; 3gen; 8fll; 6nzm; 5p9h; 6w07; 4rx5; 5vgo; 7yc9; 5kup; 6w8i; 6bln; 6w7o; 4ot5; 6ep9; 5zz4; 6hr…	85	8gmb; 4y93; 8s93; 4xi2; 5j87; 6tfp; 7r60; 7kxm; 6omu; 7kxp; 6nfh; 5p9i; 5vfi; 5p9k; 5u9d; 6n9p; 4z3v; 5p9m; 6di5; 6di1; 6di0; 7n5y; 7n5r; 8e2m; 8ejb; 6e4f; 7kxq; 7n5o; 4zly; 4zlz; 4yhf; 7n5x; 3pix; 7l5p; 6w06; 6x3o; 7l5o; 8flv; 7kxl; 6j6m; 5p9f; 8flh; 7r61; 6x3p; 7kxn; 4ot6; 5bq0; 7kxo; 6bkw; 7ltz; 5p9g; 3gen; 8fll; 6nzm; 5p9h; 6w07; 4rx5; 5vgo; 7yc9; 5kup; 6w8i; 6bln; 6w7o; 4ot5; 6ep9; 5zz4; 6hr…
					n-(3-{5-[(1,5-dimethyl-1h-pyrazol-3-yl)amino]-1-methyl-6-oxo-1,6-dihydropyridazin-3-yl}-2,6-difluorophenyl)-4,5,6,7-tetrahydro-1-benzothiophene-2-carboxamide	bound	DXM	6.00676	1	6bkw	1	85	8gmb; 4y93; 8s93; 4xi2; 5j87; 6tfp; 7r60; 7kxm; 6omu; 7kxp; 6nfh; 5p9i; 5vfi; 5p9k; 5u9d; 6n9p; 4z3v; 5p9m; 6di5; 6di1; 6di0; 7n5y; 7n5r; 8e2m; 8ejb; 6e4f; 7kxq; 7n5o; 4zly; 4zlz; 4yhf; 7n5x; 3pix; 7l5p; 6w06; 6x3o; 7l5o; 8flv; 7kxl; 6j6m; 5p9f; 8flh; 7r61; 6x3p; 7kxn; 4ot6; 5bq0; 7kxo; 6bkw; 7ltz; 5p9g; 3gen; 8fll; 6nzm; 5p9h; 6w07; 4rx5; 5vgo; 7yc9; 5kup; 6w8i; 6bln; 6w7o; 4ot5; 6ep9; 5zz4; 6hr…	85	8gmb; 4y93; 8s93; 4xi2; 5j87; 6tfp; 7r60; 7kxm; 6omu; 7kxp; 6nfh; 5p9i; 5vfi; 5p9k; 5u9d; 6n9p; 4z3v; 5p9m; 6di5; 6di1; 6di0; 7n5y; 7n5r; 8e2m; 8ejb; 6e4f; 7kxq; 7n5o; 4zly; 4zlz; 4yhf; 7n5x; 3pix; 7l5p; 6w06; 6x3o; 7l5o; 8flv; 7kxl; 6j6m; 5p9f; 8flh; 7r61; 6x3p; 7kxn; 4ot6; 5bq0; 7kxo; 6bkw; 7ltz; 5p9g; 3gen; 8fll; 6nzm; 5p9h; 6w07; 4rx5; 5vgo; 7yc9; 5kup; 6w8i; 6bln; 6w7o; 4ot5; 6ep9; 5zz4; 6hr…
					n-(3-{5-[(1,5-dimethyl-1h-pyrazol-3-yl)amino]-6-oxo-1,6-dihydropyridazin-3-yl}-2,6-difluorophenyl)-4,5,6,7-tetrahydro-1-benzothiophene-2-carboxamide	bound	DY4	6.07242	1	6bln	1	85	8gmb; 4y93; 8s93; 4xi2; 5j87; 6tfp; 7r60; 7kxm; 6omu; 7kxp; 6nfh; 5p9i; 5vfi; 5p9k; 5u9d; 6n9p; 4z3v; 5p9m; 6di5; 6di1; 6di0; 7n5y; 7n5r; 8e2m; 8ejb; 6e4f; 7kxq; 7n5o; 4zly; 4zlz; 4yhf; 7n5x; 3pix; 7l5p; 6w06; 6x3o; 7l5o; 8flv; 7kxl; 6j6m; 5p9f; 8flh; 7r61; 6x3p; 7kxn; 4ot6; 5bq0; 7kxo; 6bkw; 7ltz; 5p9g; 3gen; 8fll; 6nzm; 5p9h; 6w07; 4rx5; 5vgo; 7yc9; 5kup; 6w8i; 6bln; 6w7o; 4ot5; 6ep9; 5zz4; 6hr…	85	8gmb; 4y93; 8s93; 4xi2; 5j87; 6tfp; 7r60; 7kxm; 6omu; 7kxp; 6nfh; 5p9i; 5vfi; 5p9k; 5u9d; 6n9p; 4z3v; 5p9m; 6di5; 6di1; 6di0; 7n5y; 7n5r; 8e2m; 8ejb; 6e4f; 7kxq; 7n5o; 4zly; 4zlz; 4yhf; 7n5x; 3pix; 7l5p; 6w06; 6x3o; 7l5o; 8flv; 7kxl; 6j6m; 5p9f; 8flh; 7r61; 6x3p; 7kxn; 4ot6; 5bq0; 7kxo; 6bkw; 7ltz; 5p9g; 3gen; 8fll; 6nzm; 5p9h; 6w07; 4rx5; 5vgo; 7yc9; 5kup; 6w8i; 6bln; 6w7o; 4ot5; 6ep9; 5zz4; 6hr…
					n-(3-{[2-amino-3-(4-phenoxyphenyl)pyridin-4-yl]oxy}phenyl)propanamide	bound	KHD	6.24389	1	6n9p	1	85	8gmb; 4y93; 8s93; 4xi2; 5j87; 6tfp; 7r60; 7kxm; 6omu; 7kxp; 6nfh; 5p9i; 5vfi; 5p9k; 5u9d; 6n9p; 4z3v; 5p9m; 6di5; 6di1; 6di0; 7n5y; 7n5r; 8e2m; 8ejb; 6e4f; 7kxq; 7n5o; 4zly; 4zlz; 4yhf; 7n5x; 3pix; 7l5p; 6w06; 6x3o; 7l5o; 8flv; 7kxl; 6j6m; 5p9f; 8flh; 7r61; 6x3p; 7kxn; 4ot6; 5bq0; 7kxo; 6bkw; 7ltz; 5p9g; 3gen; 8fll; 6nzm; 5p9h; 6w07; 4rx5; 5vgo; 7yc9; 5kup; 6w8i; 6bln; 6w7o; 4ot5; 6ep9; 5zz4; 6hr…	85	8gmb; 4y93; 8s93; 4xi2; 5j87; 6tfp; 7r60; 7kxm; 6omu; 7kxp; 6nfh; 5p9i; 5vfi; 5p9k; 5u9d; 6n9p; 4z3v; 5p9m; 6di5; 6di1; 6di0; 7n5y; 7n5r; 8e2m; 8ejb; 6e4f; 7kxq; 7n5o; 4zly; 4zlz; 4yhf; 7n5x; 3pix; 7l5p; 6w06; 6x3o; 7l5o; 8flv; 7kxl; 6j6m; 5p9f; 8flh; 7r61; 6x3p; 7kxn; 4ot6; 5bq0; 7kxo; 6bkw; 7ltz; 5p9g; 3gen; 8fll; 6nzm; 5p9h; 6w07; 4rx5; 5vgo; 7yc9; 5kup; 6w8i; 6bln; 6w7o; 4ot5; 6ep9; 5zz4; 6hr…
					n-(6-fluoro-2-methyl-3-{5-[(5-methyl-4,5,6,7-tetrahydropyrazolo[1,5-a]pyrazin-2-yl)amino]-6-oxo-1,6-dihydropyridazin-3-yl}phenyl)-1-benzothiophene-2-carboxamide	bound	3YO	6.08314	1	4rx5	1	85	8gmb; 4y93; 8s93; 4xi2; 5j87; 6tfp; 7r60; 7kxm; 6omu; 7kxp; 6nfh; 5p9i; 5vfi; 5p9k; 5u9d; 6n9p; 4z3v; 5p9m; 6di5; 6di1; 6di0; 7n5y; 7n5r; 8e2m; 8ejb; 6e4f; 7kxq; 7n5o; 4zly; 4zlz; 4yhf; 7n5x; 3pix; 7l5p; 6w06; 6x3o; 7l5o; 8flv; 7kxl; 6j6m; 5p9f; 8flh; 7r61; 6x3p; 7kxn; 4ot6; 5bq0; 7kxo; 6bkw; 7ltz; 5p9g; 3gen; 8fll; 6nzm; 5p9h; 6w07; 4rx5; 5vgo; 7yc9; 5kup; 6w8i; 6bln; 6w7o; 4ot5; 6ep9; 5zz4; 6hr…	85	8gmb; 4y93; 8s93; 4xi2; 5j87; 6tfp; 7r60; 7kxm; 6omu; 7kxp; 6nfh; 5p9i; 5vfi; 5p9k; 5u9d; 6n9p; 4z3v; 5p9m; 6di5; 6di1; 6di0; 7n5y; 7n5r; 8e2m; 8ejb; 6e4f; 7kxq; 7n5o; 4zly; 4zlz; 4yhf; 7n5x; 3pix; 7l5p; 6w06; 6x3o; 7l5o; 8flv; 7kxl; 6j6m; 5p9f; 8flh; 7r61; 6x3p; 7kxn; 4ot6; 5bq0; 7kxo; 6bkw; 7ltz; 5p9g; 3gen; 8fll; 6nzm; 5p9h; 6w07; 4rx5; 5vgo; 7yc9; 5kup; 6w8i; 6bln; 6w7o; 4ot5; 6ep9; 5zz4; 6hr…
					n-[2-(2-hydroxyethyl)-3-{5-[(5-methyl-4,5,6,7-tetrahydropyrazolo[1,5-a]pyrazin-2-yl)amino]-6-oxo-1,6-dihydropyridazin-3-yl}phenyl]-1-benzothiophene-2-carboxamide	bound	DVJ	5.90501	1	6bke	1	85	8gmb; 4y93; 8s93; 4xi2; 5j87; 6tfp; 7r60; 7kxm; 6omu; 7kxp; 6nfh; 5p9i; 5vfi; 5p9k; 5u9d; 6n9p; 4z3v; 5p9m; 6di5; 6di1; 6di0; 7n5y; 7n5r; 8e2m; 8ejb; 6e4f; 7kxq; 7n5o; 4zly; 4zlz; 4yhf; 7n5x; 3pix; 7l5p; 6w06; 6x3o; 7l5o; 8flv; 7kxl; 6j6m; 5p9f; 8flh; 7r61; 6x3p; 7kxn; 4ot6; 5bq0; 7kxo; 6bkw; 7ltz; 5p9g; 3gen; 8fll; 6nzm; 5p9h; 6w07; 4rx5; 5vgo; 7yc9; 5kup; 6w8i; 6bln; 6w7o; 4ot5; 6ep9; 5zz4; 6hr…	85	8gmb; 4y93; 8s93; 4xi2; 5j87; 6tfp; 7r60; 7kxm; 6omu; 7kxp; 6nfh; 5p9i; 5vfi; 5p9k; 5u9d; 6n9p; 4z3v; 5p9m; 6di5; 6di1; 6di0; 7n5y; 7n5r; 8e2m; 8ejb; 6e4f; 7kxq; 7n5o; 4zly; 4zlz; 4yhf; 7n5x; 3pix; 7l5p; 6w06; 6x3o; 7l5o; 8flv; 7kxl; 6j6m; 5p9f; 8flh; 7r61; 6x3p; 7kxn; 4ot6; 5bq0; 7kxo; 6bkw; 7ltz; 5p9g; 3gen; 8fll; 6nzm; 5p9h; 6w07; 4rx5; 5vgo; 7yc9; 5kup; 6w8i; 6bln; 6w7o; 4ot5; 6ep9; 5zz4; 6hr…
					n-[2-methyl-3-[4-methyl-6-[4-(4-methylpiperazine-1-carbonyl)anilino]-5-oxo-pyrazin-2-yl]phenyl]-4-(1-piperidyl)benzamide	bound	BNB	6.29004	1	6ep9	1	85	8gmb; 4y93; 8s93; 4xi2; 5j87; 6tfp; 7r60; 7kxm; 6omu; 7kxp; 6nfh; 5p9i; 5vfi; 5p9k; 5u9d; 6n9p; 4z3v; 5p9m; 6di5; 6di1; 6di0; 7n5y; 7n5r; 8e2m; 8ejb; 6e4f; 7kxq; 7n5o; 4zly; 4zlz; 4yhf; 7n5x; 3pix; 7l5p; 6w06; 6x3o; 7l5o; 8flv; 7kxl; 6j6m; 5p9f; 8flh; 7r61; 6x3p; 7kxn; 4ot6; 5bq0; 7kxo; 6bkw; 7ltz; 5p9g; 3gen; 8fll; 6nzm; 5p9h; 6w07; 4rx5; 5vgo; 7yc9; 5kup; 6w8i; 6bln; 6w7o; 4ot5; 6ep9; 5zz4; 6hr…	85	8gmb; 4y93; 8s93; 4xi2; 5j87; 6tfp; 7r60; 7kxm; 6omu; 7kxp; 6nfh; 5p9i; 5vfi; 5p9k; 5u9d; 6n9p; 4z3v; 5p9m; 6di5; 6di1; 6di0; 7n5y; 7n5r; 8e2m; 8ejb; 6e4f; 7kxq; 7n5o; 4zly; 4zlz; 4yhf; 7n5x; 3pix; 7l5p; 6w06; 6x3o; 7l5o; 8flv; 7kxl; 6j6m; 5p9f; 8flh; 7r61; 6x3p; 7kxn; 4ot6; 5bq0; 7kxo; 6bkw; 7ltz; 5p9g; 3gen; 8fll; 6nzm; 5p9h; 6w07; 4rx5; 5vgo; 7yc9; 5kup; 6w8i; 6bln; 6w7o; 4ot5; 6ep9; 5zz4; 6hr…
					n-{3-[(2r)-6-{[3-amino-4-(morpholine-4-carbonyl)phenyl]amino}-5-oxo-2,5-dihydropyrazin-2-yl]-2-methylphenyl}-4-(piperidin-1-yl)benzamide	bound	BXJ	6.06363	1	6aua	1	85	8gmb; 4y93; 8s93; 4xi2; 5j87; 6tfp; 7r60; 7kxm; 6omu; 7kxp; 6nfh; 5p9i; 5vfi; 5p9k; 5u9d; 6n9p; 4z3v; 5p9m; 6di5; 6di1; 6di0; 7n5y; 7n5r; 8e2m; 8ejb; 6e4f; 7kxq; 7n5o; 4zly; 4zlz; 4yhf; 7n5x; 3pix; 7l5p; 6w06; 6x3o; 7l5o; 8flv; 7kxl; 6j6m; 5p9f; 8flh; 7r61; 6x3p; 7kxn; 4ot6; 5bq0; 7kxo; 6bkw; 7ltz; 5p9g; 3gen; 8fll; 6nzm; 5p9h; 6w07; 4rx5; 5vgo; 7yc9; 5kup; 6w8i; 6bln; 6w7o; 4ot5; 6ep9; 5zz4; 6hr…	85	8gmb; 4y93; 8s93; 4xi2; 5j87; 6tfp; 7r60; 7kxm; 6omu; 7kxp; 6nfh; 5p9i; 5vfi; 5p9k; 5u9d; 6n9p; 4z3v; 5p9m; 6di5; 6di1; 6di0; 7n5y; 7n5r; 8e2m; 8ejb; 6e4f; 7kxq; 7n5o; 4zly; 4zlz; 4yhf; 7n5x; 3pix; 7l5p; 6w06; 6x3o; 7l5o; 8flv; 7kxl; 6j6m; 5p9f; 8flh; 7r61; 6x3p; 7kxn; 4ot6; 5bq0; 7kxo; 6bkw; 7ltz; 5p9g; 3gen; 8fll; 6nzm; 5p9h; 6w07; 4rx5; 5vgo; 7yc9; 5kup; 6w8i; 6bln; 6w7o; 4ot5; 6ep9; 5zz4; 6hr…
					n-{3-[6-({4-[(2r)-1,4-dimethyl-3-oxopiperazin-2-yl]phenyl}amino)-4-methyl-5-oxo-4,5-dihydropyrazin-2-yl]-2-methylphenyl }-4,5,6,7-tetrahydro-1-benzothiophene-2-carboxamide	bound	2VL	6.46455	1	5p9f	1	85	8gmb; 4y93; 8s93; 4xi2; 5j87; 6tfp; 7r60; 7kxm; 6omu; 7kxp; 6nfh; 5p9i; 5vfi; 5p9k; 5u9d; 6n9p; 4z3v; 5p9m; 6di5; 6di1; 6di0; 7n5y; 7n5r; 8e2m; 8ejb; 6e4f; 7kxq; 7n5o; 4zly; 4zlz; 4yhf; 7n5x; 3pix; 7l5p; 6w06; 6x3o; 7l5o; 8flv; 7kxl; 6j6m; 5p9f; 8flh; 7r61; 6x3p; 7kxn; 4ot6; 5bq0; 7kxo; 6bkw; 7ltz; 5p9g; 3gen; 8fll; 6nzm; 5p9h; 6w07; 4rx5; 5vgo; 7yc9; 5kup; 6w8i; 6bln; 6w7o; 4ot5; 6ep9; 5zz4; 6hr…	85	8gmb; 4y93; 8s93; 4xi2; 5j87; 6tfp; 7r60; 7kxm; 6omu; 7kxp; 6nfh; 5p9i; 5vfi; 5p9k; 5u9d; 6n9p; 4z3v; 5p9m; 6di5; 6di1; 6di0; 7n5y; 7n5r; 8e2m; 8ejb; 6e4f; 7kxq; 7n5o; 4zly; 4zlz; 4yhf; 7n5x; 3pix; 7l5p; 6w06; 6x3o; 7l5o; 8flv; 7kxl; 6j6m; 5p9f; 8flh; 7r61; 6x3p; 7kxn; 4ot6; 5bq0; 7kxo; 6bkw; 7ltz; 5p9g; 3gen; 8fll; 6nzm; 5p9h; 6w07; 4rx5; 5vgo; 7yc9; 5kup; 6w8i; 6bln; 6w7o; 4ot5; 6ep9; 5zz4; 6hr…
					n-{3-[6-({4-[(2r)-1,4-dimethyl-3-oxopiperazin-2-yl]phenyl}amino)-4-methyl-5-oxo-4,5-dihydropyrazin-2-yl]-2-methylphenyl}-4,5,6,7-tetrahydro-1-benzothiophene-2-carboxamide	bound	2VL	6.21726	1	4otf	1	85	8gmb; 4y93; 8s93; 4xi2; 5j87; 6tfp; 7r60; 7kxm; 6omu; 7kxp; 6nfh; 5p9i; 5vfi; 5p9k; 5u9d; 6n9p; 4z3v; 5p9m; 6di5; 6di1; 6di0; 7n5y; 7n5r; 8e2m; 8ejb; 6e4f; 7kxq; 7n5o; 4zly; 4zlz; 4yhf; 7n5x; 3pix; 7l5p; 6w06; 6x3o; 7l5o; 8flv; 7kxl; 6j6m; 5p9f; 8flh; 7r61; 6x3p; 7kxn; 4ot6; 5bq0; 7kxo; 6bkw; 7ltz; 5p9g; 3gen; 8fll; 6nzm; 5p9h; 6w07; 4rx5; 5vgo; 7yc9; 5kup; 6w8i; 6bln; 6w7o; 4ot5; 6ep9; 5zz4; 6hr…	85	8gmb; 4y93; 8s93; 4xi2; 5j87; 6tfp; 7r60; 7kxm; 6omu; 7kxp; 6nfh; 5p9i; 5vfi; 5p9k; 5u9d; 6n9p; 4z3v; 5p9m; 6di5; 6di1; 6di0; 7n5y; 7n5r; 8e2m; 8ejb; 6e4f; 7kxq; 7n5o; 4zly; 4zlz; 4yhf; 7n5x; 3pix; 7l5p; 6w06; 6x3o; 7l5o; 8flv; 7kxl; 6j6m; 5p9f; 8flh; 7r61; 6x3p; 7kxn; 4ot6; 5bq0; 7kxo; 6bkw; 7ltz; 5p9g; 3gen; 8fll; 6nzm; 5p9h; 6w07; 4rx5; 5vgo; 7yc9; 5kup; 6w8i; 6bln; 6w7o; 4ot5; 6ep9; 5zz4; 6hr…
					triphenylphosphane	bound	FPZ	3.86658	1	6bkw	1	85	8gmb; 4y93; 8s93; 4xi2; 5j87; 6tfp; 7r60; 7kxm; 6omu; 7kxp; 6nfh; 5p9i; 5vfi; 5p9k; 5u9d; 6n9p; 4z3v; 5p9m; 6di5; 6di1; 6di0; 7n5y; 7n5r; 8e2m; 8ejb; 6e4f; 7kxq; 7n5o; 4zly; 4zlz; 4yhf; 7n5x; 3pix; 7l5p; 6w06; 6x3o; 7l5o; 8flv; 7kxl; 6j6m; 5p9f; 8flh; 7r61; 6x3p; 7kxn; 4ot6; 5bq0; 7kxo; 6bkw; 7ltz; 5p9g; 3gen; 8fll; 6nzm; 5p9h; 6w07; 4rx5; 5vgo; 7yc9; 5kup; 6w8i; 6bln; 6w7o; 4ot5; 6ep9; 5zz4; 6hr…	85	8gmb; 4y93; 8s93; 4xi2; 5j87; 6tfp; 7r60; 7kxm; 6omu; 7kxp; 6nfh; 5p9i; 5vfi; 5p9k; 5u9d; 6n9p; 4z3v; 5p9m; 6di5; 6di1; 6di0; 7n5y; 7n5r; 8e2m; 8ejb; 6e4f; 7kxq; 7n5o; 4zly; 4zlz; 4yhf; 7n5x; 3pix; 7l5p; 6w06; 6x3o; 7l5o; 8flv; 7kxl; 6j6m; 5p9f; 8flh; 7r61; 6x3p; 7kxn; 4ot6; 5bq0; 7kxo; 6bkw; 7ltz; 5p9g; 3gen; 8fll; 6nzm; 5p9h; 6w07; 4rx5; 5vgo; 7yc9; 5kup; 6w8i; 6bln; 6w7o; 4ot5; 6ep9; 5zz4; 6hr…
					~{n}-[[2-methyl-4-[2-[(1-methylpyrazol-4-yl)amino]pyrimidin-4-yl]phenyl]methyl]-3-propan-2-yloxy-azetidine-1-carboxamide	bound	S9A	6.30953	1	6w07	1	85	8gmb; 4y93; 8s93; 4xi2; 5j87; 6tfp; 7r60; 7kxm; 6omu; 7kxp; 6nfh; 5p9i; 5vfi; 5p9k; 5u9d; 6n9p; 4z3v; 5p9m; 6di5; 6di1; 6di0; 7n5y; 7n5r; 8e2m; 8ejb; 6e4f; 7kxq; 7n5o; 4zly; 4zlz; 4yhf; 7n5x; 3pix; 7l5p; 6w06; 6x3o; 7l5o; 8flv; 7kxl; 6j6m; 5p9f; 8flh; 7r61; 6x3p; 7kxn; 4ot6; 5bq0; 7kxo; 6bkw; 7ltz; 5p9g; 3gen; 8fll; 6nzm; 5p9h; 6w07; 4rx5; 5vgo; 7yc9; 5kup; 6w8i; 6bln; 6w7o; 4ot5; 6ep9; 5zz4; 6hr…	85	8gmb; 4y93; 8s93; 4xi2; 5j87; 6tfp; 7r60; 7kxm; 6omu; 7kxp; 6nfh; 5p9i; 5vfi; 5p9k; 5u9d; 6n9p; 4z3v; 5p9m; 6di5; 6di1; 6di0; 7n5y; 7n5r; 8e2m; 8ejb; 6e4f; 7kxq; 7n5o; 4zly; 4zlz; 4yhf; 7n5x; 3pix; 7l5p; 6w06; 6x3o; 7l5o; 8flv; 7kxl; 6j6m; 5p9f; 8flh; 7r61; 6x3p; 7kxn; 4ot6; 5bq0; 7kxo; 6bkw; 7ltz; 5p9g; 3gen; 8fll; 6nzm; 5p9h; 6w07; 4rx5; 5vgo; 7yc9; 5kup; 6w8i; 6bln; 6w7o; 4ot5; 6ep9; 5zz4; 6hr…
			L358F	-5.196					0		0	2	8gmb; 4xi2	2	8gmb; 4xi2
6	HDAC2	NP_001518.3	M31R	-5.726	zinc ion	bound	ZN	7.13089	33	6whn; 6who; 6whq; 6wi3; 6whz; 7zzu; 7zzt; 7zzr; 7zzs; 6g3o; 8a0b; 7zzp; 5ix0; 7kbg; 7mot; 7mox; 7moy; 7moz; 7mos; 4lxz; 6xeb; 6xdm; 7zzw; 5iwg; 6wbz; 6xec; 4ly1; 7js8; 6wbw; 7ltk; 7ltl; 7ltg; 3max	33	38	6whn; 6who; 6whq; 6wi3; 6whz; 7zzu; 7zzt; 7zzr; 7zzs; 6g3o; 8a0b; 7zzp; 5ix0; 8bpa; 7kbg; 7mot; 7mox; 7moy; 7moz; 8bpb; 7zzo; 8bpc; 7mos; 8c60; 4lxz; 6xeb; 6xdm; 7zzw; 5iwg; 6wbz; 6xec; 4ly1; 7js8; 6wbw; 7ltk; 7ltl; 7ltg; 3max	38	6whn; 6who; 6whq; 6wi3; 6whz; 7zzu; 7zzt; 7zzr; 7zzs; 6g3o; 8a0b; 7zzp; 5ix0; 8bpa; 7kbg; 7mot; 7mox; 7moy; 7moz; 8bpb; 7zzo; 8bpc; 7mos; 8c60; 4lxz; 6xeb; 6xdm; 7zzw; 5iwg; 6wbz; 6xec; 4ly1; 7js8; 6wbw; 7ltk; 7ltl; 7ltg; 3max
					paired amphipathic helix protein sin3b	polypeptide(L)		5.25506	4	8bpa; 8bpb; 8bpc; 8c60	4	38	6whn; 6who; 6whq; 6wi3; 6whz; 7zzu; 7zzt; 7zzr; 7zzs; 6g3o; 8a0b; 7zzp; 5ix0; 8bpa; 7kbg; 7mot; 7mox; 7moy; 7moz; 8bpb; 7zzo; 8bpc; 7mos; 8c60; 4lxz; 6xeb; 6xdm; 7zzw; 5iwg; 6wbz; 6xec; 4ly1; 7js8; 6wbw; 7ltk; 7ltl; 7ltg; 3max	38	6whn; 6who; 6whq; 6wi3; 6whz; 7zzu; 7zzt; 7zzr; 7zzs; 6g3o; 8a0b; 7zzp; 5ix0; 8bpa; 7kbg; 7mot; 7mox; 7moy; 7moz; 8bpb; 7zzo; 8bpc; 7mos; 8c60; 4lxz; 6xeb; 6xdm; 7zzw; 5iwg; 6wbz; 6xec; 4ly1; 7js8; 6wbw; 7ltk; 7ltl; 7ltg; 3max
					octanedioic acid hydroxyamide phenylamide	bound	SHH	4.92493	3	7zzs; 8bpc; 4lxz	3	38	6whn; 6who; 6whq; 6wi3; 6whz; 7zzu; 7zzt; 7zzr; 7zzs; 6g3o; 8a0b; 7zzp; 5ix0; 8bpa; 7kbg; 7mot; 7mox; 7moy; 7moz; 8bpb; 7zzo; 8bpc; 7mos; 8c60; 4lxz; 6xeb; 6xdm; 7zzw; 5iwg; 6wbz; 6xec; 4ly1; 7js8; 6wbw; 7ltk; 7ltl; 7ltg; 3max	38	6whn; 6who; 6whq; 6wi3; 6whz; 7zzu; 7zzt; 7zzr; 7zzs; 6g3o; 8a0b; 7zzp; 5ix0; 8bpa; 7kbg; 7mot; 7mox; 7moy; 7moz; 8bpb; 7zzo; 8bpc; 7mos; 8c60; 4lxz; 6xeb; 6xdm; 7zzw; 5iwg; 6wbz; 6xec; 4ly1; 7js8; 6wbw; 7ltk; 7ltl; 7ltg; 3max
					5-{(1s)-7,7-dihydroxy-1-[(1-methylazetidine-3-carbonyl)amino]nonyl}-2-phenyl-1h-imidazole-4-carboxamide	bound	V1P	3.56445	2	7mot; 6xeb	2	38	6whn; 6who; 6whq; 6wi3; 6whz; 7zzu; 7zzt; 7zzr; 7zzs; 6g3o; 8a0b; 7zzp; 5ix0; 8bpa; 7kbg; 7mot; 7mox; 7moy; 7moz; 8bpb; 7zzo; 8bpc; 7mos; 8c60; 4lxz; 6xeb; 6xdm; 7zzw; 5iwg; 6wbz; 6xec; 4ly1; 7js8; 6wbw; 7ltk; 7ltl; 7ltg; 3max	38	6whn; 6who; 6whq; 6wi3; 6whz; 7zzu; 7zzt; 7zzr; 7zzs; 6g3o; 8a0b; 7zzp; 5ix0; 8bpa; 7kbg; 7mot; 7mox; 7moy; 7moz; 8bpb; 7zzo; 8bpc; 7mos; 8c60; 4lxz; 6xeb; 6xdm; 7zzw; 5iwg; 6wbz; 6xec; 4ly1; 7js8; 6wbw; 7ltk; 7ltl; 7ltg; 3max
					u2m-asn-pro-glu-gln-dly-trp-gly peptide macrocycle	polypeptide(L)		7.23789	2	6who; 6whq	2	38	6whn; 6who; 6whq; 6wi3; 6whz; 7zzu; 7zzt; 7zzr; 7zzs; 6g3o; 8a0b; 7zzp; 5ix0; 8bpa; 7kbg; 7mot; 7mox; 7moy; 7moz; 8bpb; 7zzo; 8bpc; 7mos; 8c60; 4lxz; 6xeb; 6xdm; 7zzw; 5iwg; 6wbz; 6xec; 4ly1; 7js8; 6wbw; 7ltk; 7ltl; 7ltg; 3max	38	6whn; 6who; 6whq; 6wi3; 6whz; 7zzu; 7zzt; 7zzr; 7zzs; 6g3o; 8a0b; 7zzp; 5ix0; 8bpa; 7kbg; 7mot; 7mox; 7moy; 7moz; 8bpb; 7zzo; 8bpc; 7mos; 8c60; 4lxz; 6xeb; 6xdm; 7zzw; 5iwg; 6wbz; 6xec; 4ly1; 7js8; 6wbw; 7ltk; 7ltl; 7ltg; 3max
					u2m-asn-pro-lys-gln-dly-trp-gly peptide macrocycle	polypeptide(L)		6.76908	1	6whn	1	38	6whn; 6who; 6whq; 6wi3; 6whz; 7zzu; 7zzt; 7zzr; 7zzs; 6g3o; 8a0b; 7zzp; 5ix0; 8bpa; 7kbg; 7mot; 7mox; 7moy; 7moz; 8bpb; 7zzo; 8bpc; 7mos; 8c60; 4lxz; 6xeb; 6xdm; 7zzw; 5iwg; 6wbz; 6xec; 4ly1; 7js8; 6wbw; 7ltk; 7ltl; 7ltg; 3max	38	6whn; 6who; 6whq; 6wi3; 6whz; 7zzu; 7zzt; 7zzr; 7zzs; 6g3o; 8a0b; 7zzp; 5ix0; 8bpa; 7kbg; 7mot; 7mox; 7moy; 7moz; 8bpb; 7zzo; 8bpc; 7mos; 8c60; 4lxz; 6xeb; 6xdm; 7zzw; 5iwg; 6wbz; 6xec; 4ly1; 7js8; 6wbw; 7ltk; 7ltl; 7ltg; 3max
					(1r,3s,6s,18r,27r)-6-(6,6-dihydroxyoctyl)-5,8,18,27,34-pentaazahexacyclo[25.2.2.1~7,10~.1~11,15~.1~14,18~.0~1,3~]tetratriaconta-7,9,11(33),12,14,16-hexaene-4,32-dione (non-preferred name)	bound	ZL4	3.53452	1	7moz	1	38	6whn; 6who; 6whq; 6wi3; 6whz; 7zzu; 7zzt; 7zzr; 7zzs; 6g3o; 8a0b; 7zzp; 5ix0; 8bpa; 7kbg; 7mot; 7mox; 7moy; 7moz; 8bpb; 7zzo; 8bpc; 7mos; 8c60; 4lxz; 6xeb; 6xdm; 7zzw; 5iwg; 6wbz; 6xec; 4ly1; 7js8; 6wbw; 7ltk; 7ltl; 7ltg; 3max	38	6whn; 6who; 6whq; 6wi3; 6whz; 7zzu; 7zzt; 7zzr; 7zzs; 6g3o; 8a0b; 7zzp; 5ix0; 8bpa; 7kbg; 7mot; 7mox; 7moy; 7moz; 8bpb; 7zzo; 8bpc; 7mos; 8c60; 4lxz; 6xeb; 6xdm; 7zzw; 5iwg; 6wbz; 6xec; 4ly1; 7js8; 6wbw; 7ltk; 7ltl; 7ltg; 3max
					(1s)-6-ethyl-n-{(1s)-1-[5-(2-ethyl-1-oxo-1,2-dihydroisoquinolin-6-yl)-1h-imidazol-2-yl]-7,7-dihydroxynonyl}-6-azaspiro[2.5]octane-1-carboxamide	bound	ZLM	3.54408	1	7moy	1	38	6whn; 6who; 6whq; 6wi3; 6whz; 7zzu; 7zzt; 7zzr; 7zzs; 6g3o; 8a0b; 7zzp; 5ix0; 8bpa; 7kbg; 7mot; 7mox; 7moy; 7moz; 8bpb; 7zzo; 8bpc; 7mos; 8c60; 4lxz; 6xeb; 6xdm; 7zzw; 5iwg; 6wbz; 6xec; 4ly1; 7js8; 6wbw; 7ltk; 7ltl; 7ltg; 3max	38	6whn; 6who; 6whq; 6wi3; 6whz; 7zzu; 7zzt; 7zzr; 7zzs; 6g3o; 8a0b; 7zzp; 5ix0; 8bpa; 7kbg; 7mot; 7mox; 7moy; 7moz; 8bpb; 7zzo; 8bpc; 7mos; 8c60; 4lxz; 6xeb; 6xdm; 7zzw; 5iwg; 6wbz; 6xec; 4ly1; 7js8; 6wbw; 7ltk; 7ltl; 7ltg; 3max
					(1s)-n-[(1s)-7,7-dihydroxy-1-{4-[(1r,4s)-1,2,3,4-tetrahydro-1,4-methanonaphthalen-6-yl]-1h-imidazol-2-yl}nonyl]-6-methyl-6-azaspiro[2.5]octane-1-carboxamide	bound	ZLS	3.56093	1	7mox	1	38	6whn; 6who; 6whq; 6wi3; 6whz; 7zzu; 7zzt; 7zzr; 7zzs; 6g3o; 8a0b; 7zzp; 5ix0; 8bpa; 7kbg; 7mot; 7mox; 7moy; 7moz; 8bpb; 7zzo; 8bpc; 7mos; 8c60; 4lxz; 6xeb; 6xdm; 7zzw; 5iwg; 6wbz; 6xec; 4ly1; 7js8; 6wbw; 7ltk; 7ltl; 7ltg; 3max	38	6whn; 6who; 6whq; 6wi3; 6whz; 7zzu; 7zzt; 7zzr; 7zzs; 6g3o; 8a0b; 7zzp; 5ix0; 8bpa; 7kbg; 7mot; 7mox; 7moy; 7moz; 8bpb; 7zzo; 8bpc; 7mos; 8c60; 4lxz; 6xeb; 6xdm; 7zzw; 5iwg; 6wbz; 6xec; 4ly1; 7js8; 6wbw; 7ltk; 7ltl; 7ltg; 3max
					(1s)-n-{(1s)-1-[5-cyano-2-(4-fluorophenyl)-1h-imidazol-4-yl]-7,7-dihydroxynonyl}-6-methyl-6-azaspiro[2.5]octane-1-carboxamide	bound	V1S	3.60982	1	6xec	1	38	6whn; 6who; 6whq; 6wi3; 6whz; 7zzu; 7zzt; 7zzr; 7zzs; 6g3o; 8a0b; 7zzp; 5ix0; 8bpa; 7kbg; 7mot; 7mox; 7moy; 7moz; 8bpb; 7zzo; 8bpc; 7mos; 8c60; 4lxz; 6xeb; 6xdm; 7zzw; 5iwg; 6wbz; 6xec; 4ly1; 7js8; 6wbw; 7ltk; 7ltl; 7ltg; 3max	38	6whn; 6who; 6whq; 6wi3; 6whz; 7zzu; 7zzt; 7zzr; 7zzs; 6g3o; 8a0b; 7zzp; 5ix0; 8bpa; 7kbg; 7mot; 7mox; 7moy; 7moz; 8bpb; 7zzo; 8bpc; 7mos; 8c60; 4lxz; 6xeb; 6xdm; 7zzw; 5iwg; 6wbz; 6xec; 4ly1; 7js8; 6wbw; 7ltk; 7ltl; 7ltg; 3max
					(1s)-n-{(1s)-7,7-dihydroxy-1-[4-(2-methylquinolin-6-yl)-1h-imidazol-2-yl]nonyl}-6-methyl-6-azaspiro[2.5]octane-1-carboxamide	bound	VJV	3.53859	1	7js8	1	38	6whn; 6who; 6whq; 6wi3; 6whz; 7zzu; 7zzt; 7zzr; 7zzs; 6g3o; 8a0b; 7zzp; 5ix0; 8bpa; 7kbg; 7mot; 7mox; 7moy; 7moz; 8bpb; 7zzo; 8bpc; 7mos; 8c60; 4lxz; 6xeb; 6xdm; 7zzw; 5iwg; 6wbz; 6xec; 4ly1; 7js8; 6wbw; 7ltk; 7ltl; 7ltg; 3max	38	6whn; 6who; 6whq; 6wi3; 6whz; 7zzu; 7zzt; 7zzr; 7zzs; 6g3o; 8a0b; 7zzp; 5ix0; 8bpa; 7kbg; 7mot; 7mox; 7moy; 7moz; 8bpb; 7zzo; 8bpc; 7mos; 8c60; 4lxz; 6xeb; 6xdm; 7zzw; 5iwg; 6wbz; 6xec; 4ly1; 7js8; 6wbw; 7ltk; 7ltl; 7ltg; 3max
					(1s)-n-{(1s)-7,7-dihydroxy-1-[5-(2-methoxyquinolin-3-yl)-1h-imidazol-2-yl]nonyl}-6-ethyl-6-azaspiro[2.5]octane-1-carboxamide	bound	TV7	3.52809	1	6wbz	1	38	6whn; 6who; 6whq; 6wi3; 6whz; 7zzu; 7zzt; 7zzr; 7zzs; 6g3o; 8a0b; 7zzp; 5ix0; 8bpa; 7kbg; 7mot; 7mox; 7moy; 7moz; 8bpb; 7zzo; 8bpc; 7mos; 8c60; 4lxz; 6xeb; 6xdm; 7zzw; 5iwg; 6wbz; 6xec; 4ly1; 7js8; 6wbw; 7ltk; 7ltl; 7ltg; 3max	38	6whn; 6who; 6whq; 6wi3; 6whz; 7zzu; 7zzt; 7zzr; 7zzs; 6g3o; 8a0b; 7zzp; 5ix0; 8bpa; 7kbg; 7mot; 7mox; 7moy; 7moz; 8bpb; 7zzo; 8bpc; 7mos; 8c60; 4lxz; 6xeb; 6xdm; 7zzw; 5iwg; 6wbz; 6xec; 4ly1; 7js8; 6wbw; 7ltk; 7ltl; 7ltg; 3max
					(2r)-2-(5-hydroxy-2-methyl-1h-indol-3-yl)-n-{(1s)-1-[5-(2-methoxyquinolin-3-yl)-1h-imidazol-2-yl]pentyl}propanamide	bound	YEV	6.53437	1	7ltl	1	38	6whn; 6who; 6whq; 6wi3; 6whz; 7zzu; 7zzt; 7zzr; 7zzs; 6g3o; 8a0b; 7zzp; 5ix0; 8bpa; 7kbg; 7mot; 7mox; 7moy; 7moz; 8bpb; 7zzo; 8bpc; 7mos; 8c60; 4lxz; 6xeb; 6xdm; 7zzw; 5iwg; 6wbz; 6xec; 4ly1; 7js8; 6wbw; 7ltk; 7ltl; 7ltg; 3max	38	6whn; 6who; 6whq; 6wi3; 6whz; 7zzu; 7zzt; 7zzr; 7zzs; 6g3o; 8a0b; 7zzp; 5ix0; 8bpa; 7kbg; 7mot; 7mox; 7moy; 7moz; 8bpb; 7zzo; 8bpc; 7mos; 8c60; 4lxz; 6xeb; 6xdm; 7zzw; 5iwg; 6wbz; 6xec; 4ly1; 7js8; 6wbw; 7ltk; 7ltl; 7ltg; 3max
					(2s)-2-hydroxypropanoic acid	bound	2OP	3.51826	1	7zzp	1	38	6whn; 6who; 6whq; 6wi3; 6whz; 7zzu; 7zzt; 7zzr; 7zzs; 6g3o; 8a0b; 7zzp; 5ix0; 8bpa; 7kbg; 7mot; 7mox; 7moy; 7moz; 8bpb; 7zzo; 8bpc; 7mos; 8c60; 4lxz; 6xeb; 6xdm; 7zzw; 5iwg; 6wbz; 6xec; 4ly1; 7js8; 6wbw; 7ltk; 7ltl; 7ltg; 3max	38	6whn; 6who; 6whq; 6wi3; 6whz; 7zzu; 7zzt; 7zzr; 7zzs; 6g3o; 8a0b; 7zzp; 5ix0; 8bpa; 7kbg; 7mot; 7mox; 7moy; 7moz; 8bpb; 7zzo; 8bpc; 7mos; 8c60; 4lxz; 6xeb; 6xdm; 7zzw; 5iwg; 6wbz; 6xec; 4ly1; 7js8; 6wbw; 7ltk; 7ltl; 7ltg; 3max
					(3-exo)-n-(4-amino-4'-fluoro[1,1'-biphenyl]-3-yl)-8-oxabicyclo[3.2.1]octane-3-carboxamide	bound	6EZ	3.4569	1	5ix0	1	38	6whn; 6who; 6whq; 6wi3; 6whz; 7zzu; 7zzt; 7zzr; 7zzs; 6g3o; 8a0b; 7zzp; 5ix0; 8bpa; 7kbg; 7mot; 7mox; 7moy; 7moz; 8bpb; 7zzo; 8bpc; 7mos; 8c60; 4lxz; 6xeb; 6xdm; 7zzw; 5iwg; 6wbz; 6xec; 4ly1; 7js8; 6wbw; 7ltk; 7ltl; 7ltg; 3max	38	6whn; 6who; 6whq; 6wi3; 6whz; 7zzu; 7zzt; 7zzr; 7zzs; 6g3o; 8a0b; 7zzp; 5ix0; 8bpa; 7kbg; 7mot; 7mox; 7moy; 7moz; 8bpb; 7zzo; 8bpc; 7mos; 8c60; 4lxz; 6xeb; 6xdm; 7zzw; 5iwg; 6wbz; 6xec; 4ly1; 7js8; 6wbw; 7ltk; 7ltl; 7ltg; 3max
					(3s,18s,20ar)-18-(6,6-dihydroxyoctyl)-1,5,6,7,8,18,19,20a-octahydro-4h-14,17-epiminoazeto[1,2-g][1,7,10,13]benzoxatriazacycloheptadecin-20(2h)-one	bound	ZLV	3.52977	1	7mos	1	38	6whn; 6who; 6whq; 6wi3; 6whz; 7zzu; 7zzt; 7zzr; 7zzs; 6g3o; 8a0b; 7zzp; 5ix0; 8bpa; 7kbg; 7mot; 7mox; 7moy; 7moz; 8bpb; 7zzo; 8bpc; 7mos; 8c60; 4lxz; 6xeb; 6xdm; 7zzw; 5iwg; 6wbz; 6xec; 4ly1; 7js8; 6wbw; 7ltk; 7ltl; 7ltg; 3max	38	6whn; 6who; 6whq; 6wi3; 6whz; 7zzu; 7zzt; 7zzr; 7zzs; 6g3o; 8a0b; 7zzp; 5ix0; 8bpa; 7kbg; 7mot; 7mox; 7moy; 7moz; 8bpb; 7zzo; 8bpc; 7mos; 8c60; 4lxz; 6xeb; 6xdm; 7zzw; 5iwg; 6wbz; 6xec; 4ly1; 7js8; 6wbw; 7ltk; 7ltl; 7ltg; 3max
					(3s,6s,9s,15ar)-9-[(2s)-butan-2-yl]-3-(6,6-dihydroxyoctyl)-6-[(1-methoxy-1h-indol-3-yl)methyl]octahydro-2h-pyrido[1,2-a][1,4,7,10]tetraazacyclododecine-1,4,7,10(3h,12h)-tetrone	bound	YED	3.57941	1	7ltg	1	38	6whn; 6who; 6whq; 6wi3; 6whz; 7zzu; 7zzt; 7zzr; 7zzs; 6g3o; 8a0b; 7zzp; 5ix0; 8bpa; 7kbg; 7mot; 7mox; 7moy; 7moz; 8bpb; 7zzo; 8bpc; 7mos; 8c60; 4lxz; 6xeb; 6xdm; 7zzw; 5iwg; 6wbz; 6xec; 4ly1; 7js8; 6wbw; 7ltk; 7ltl; 7ltg; 3max	38	6whn; 6who; 6whq; 6wi3; 6whz; 7zzu; 7zzt; 7zzr; 7zzs; 6g3o; 8a0b; 7zzp; 5ix0; 8bpa; 7kbg; 7mot; 7mox; 7moy; 7moz; 8bpb; 7zzo; 8bpc; 7mos; 8c60; 4lxz; 6xeb; 6xdm; 7zzw; 5iwg; 6wbz; 6xec; 4ly1; 7js8; 6wbw; 7ltk; 7ltl; 7ltg; 3max
					(5~{s})-5-(4-chlorophenyl)pyrrolidin-2-one	bound	KK0	2.46777	1	7zzs	1	38	6whn; 6who; 6whq; 6wi3; 6whz; 7zzu; 7zzt; 7zzr; 7zzs; 6g3o; 8a0b; 7zzp; 5ix0; 8bpa; 7kbg; 7mot; 7mox; 7moy; 7moz; 8bpb; 7zzo; 8bpc; 7mos; 8c60; 4lxz; 6xeb; 6xdm; 7zzw; 5iwg; 6wbz; 6xec; 4ly1; 7js8; 6wbw; 7ltk; 7ltl; 7ltg; 3max	38	6whn; 6who; 6whq; 6wi3; 6whz; 7zzu; 7zzt; 7zzr; 7zzs; 6g3o; 8a0b; 7zzp; 5ix0; 8bpa; 7kbg; 7mot; 7mox; 7moy; 7moz; 8bpb; 7zzo; 8bpc; 7mos; 8c60; 4lxz; 6xeb; 6xdm; 7zzw; 5iwg; 6wbz; 6xec; 4ly1; 7js8; 6wbw; 7ltk; 7ltl; 7ltg; 3max
					(6~{r})-6-[[3,4-bis(oxidanylidene)-2-[[4-(trifluoromethyloxy)phenyl]amino]cyclobuten-1-yl]amino]-~{n}-oxidanyl-heptanamide	bound	EL8	5.8647	1	6g3o	1	38	6whn; 6who; 6whq; 6wi3; 6whz; 7zzu; 7zzt; 7zzr; 7zzs; 6g3o; 8a0b; 7zzp; 5ix0; 8bpa; 7kbg; 7mot; 7mox; 7moy; 7moz; 8bpb; 7zzo; 8bpc; 7mos; 8c60; 4lxz; 6xeb; 6xdm; 7zzw; 5iwg; 6wbz; 6xec; 4ly1; 7js8; 6wbw; 7ltk; 7ltl; 7ltg; 3max	38	6whn; 6who; 6whq; 6wi3; 6whz; 7zzu; 7zzt; 7zzr; 7zzs; 6g3o; 8a0b; 7zzp; 5ix0; 8bpa; 7kbg; 7mot; 7mox; 7moy; 7moz; 8bpb; 7zzo; 8bpc; 7mos; 8c60; 4lxz; 6xeb; 6xdm; 7zzw; 5iwg; 6wbz; 6xec; 4ly1; 7js8; 6wbw; 7ltk; 7ltl; 7ltg; 3max
					(sha)w(dth)dn(dsn)(dme)(das)k peptide macrocycle	polypeptide(L)		6.95422	1	6wi3	1	38	6whn; 6who; 6whq; 6wi3; 6whz; 7zzu; 7zzt; 7zzr; 7zzs; 6g3o; 8a0b; 7zzp; 5ix0; 8bpa; 7kbg; 7mot; 7mox; 7moy; 7moz; 8bpb; 7zzo; 8bpc; 7mos; 8c60; 4lxz; 6xeb; 6xdm; 7zzw; 5iwg; 6wbz; 6xec; 4ly1; 7js8; 6wbw; 7ltk; 7ltl; 7ltg; 3max	38	6whn; 6who; 6whq; 6wi3; 6whz; 7zzu; 7zzt; 7zzr; 7zzs; 6g3o; 8a0b; 7zzp; 5ix0; 8bpa; 7kbg; 7mot; 7mox; 7moy; 7moz; 8bpb; 7zzo; 8bpc; 7mos; 8c60; 4lxz; 6xeb; 6xdm; 7zzw; 5iwg; 6wbz; 6xec; 4ly1; 7js8; 6wbw; 7ltk; 7ltl; 7ltg; 3max
					1,3-dihydroisoindol-2-yl-[(2r,4s)-4-phenylpyrrolidin-1-ium-2-yl]methanone	bound	KRU	3.50533	1	8a0b	1	38	6whn; 6who; 6whq; 6wi3; 6whz; 7zzu; 7zzt; 7zzr; 7zzs; 6g3o; 8a0b; 7zzp; 5ix0; 8bpa; 7kbg; 7mot; 7mox; 7moy; 7moz; 8bpb; 7zzo; 8bpc; 7mos; 8c60; 4lxz; 6xeb; 6xdm; 7zzw; 5iwg; 6wbz; 6xec; 4ly1; 7js8; 6wbw; 7ltk; 7ltl; 7ltg; 3max	38	6whn; 6who; 6whq; 6wi3; 6whz; 7zzu; 7zzt; 7zzr; 7zzs; 6g3o; 8a0b; 7zzp; 5ix0; 8bpa; 7kbg; 7mot; 7mox; 7moy; 7moz; 8bpb; 7zzo; 8bpc; 7mos; 8c60; 4lxz; 6xeb; 6xdm; 7zzw; 5iwg; 6wbz; 6xec; 4ly1; 7js8; 6wbw; 7ltk; 7ltl; 7ltg; 3max
					2-[4-[(2~{r},4~{s})-4-phenylpyrrolidin-2-yl]carbonylpiperazin-1-yl]pyridine-3-carbonitrile	bound	KKI	3.30218	1	7zzu	1	38	6whn; 6who; 6whq; 6wi3; 6whz; 7zzu; 7zzt; 7zzr; 7zzs; 6g3o; 8a0b; 7zzp; 5ix0; 8bpa; 7kbg; 7mot; 7mox; 7moy; 7moz; 8bpb; 7zzo; 8bpc; 7mos; 8c60; 4lxz; 6xeb; 6xdm; 7zzw; 5iwg; 6wbz; 6xec; 4ly1; 7js8; 6wbw; 7ltk; 7ltl; 7ltg; 3max	38	6whn; 6who; 6whq; 6wi3; 6whz; 7zzu; 7zzt; 7zzr; 7zzs; 6g3o; 8a0b; 7zzp; 5ix0; 8bpa; 7kbg; 7mot; 7mox; 7moy; 7moz; 8bpb; 7zzo; 8bpc; 7mos; 8c60; 4lxz; 6xeb; 6xdm; 7zzw; 5iwg; 6wbz; 6xec; 4ly1; 7js8; 6wbw; 7ltk; 7ltl; 7ltg; 3max
					4-(acetylamino)-n-[2-amino-5-(thiophen-2-yl)phenyl]benzamide	bound	20Y	3.46839	1	4ly1	1	38	6whn; 6who; 6whq; 6wi3; 6whz; 7zzu; 7zzt; 7zzr; 7zzs; 6g3o; 8a0b; 7zzp; 5ix0; 8bpa; 7kbg; 7mot; 7mox; 7moy; 7moz; 8bpb; 7zzo; 8bpc; 7mos; 8c60; 4lxz; 6xeb; 6xdm; 7zzw; 5iwg; 6wbz; 6xec; 4ly1; 7js8; 6wbw; 7ltk; 7ltl; 7ltg; 3max	38	6whn; 6who; 6whq; 6wi3; 6whz; 7zzu; 7zzt; 7zzr; 7zzs; 6g3o; 8a0b; 7zzp; 5ix0; 8bpa; 7kbg; 7mot; 7mox; 7moy; 7moz; 8bpb; 7zzo; 8bpc; 7mos; 8c60; 4lxz; 6xeb; 6xdm; 7zzw; 5iwg; 6wbz; 6xec; 4ly1; 7js8; 6wbw; 7ltk; 7ltl; 7ltg; 3max
					6-methyl-4-oxidanyl-pyran-2-one	bound	KJ6	6.13303	1	7zzp	1	38	6whn; 6who; 6whq; 6wi3; 6whz; 7zzu; 7zzt; 7zzr; 7zzs; 6g3o; 8a0b; 7zzp; 5ix0; 8bpa; 7kbg; 7mot; 7mox; 7moy; 7moz; 8bpb; 7zzo; 8bpc; 7mos; 8c60; 4lxz; 6xeb; 6xdm; 7zzw; 5iwg; 6wbz; 6xec; 4ly1; 7js8; 6wbw; 7ltk; 7ltl; 7ltg; 3max	38	6whn; 6who; 6whq; 6wi3; 6whz; 7zzu; 7zzt; 7zzr; 7zzs; 6g3o; 8a0b; 7zzp; 5ix0; 8bpa; 7kbg; 7mot; 7mox; 7moy; 7moz; 8bpb; 7zzo; 8bpc; 7mos; 8c60; 4lxz; 6xeb; 6xdm; 7zzw; 5iwg; 6wbz; 6xec; 4ly1; 7js8; 6wbw; 7ltk; 7ltl; 7ltg; 3max
					[(2~{r})-1-(dimethylamino)-1-oxidanylidene-4-phenyl-butan-2-yl]azanium	bound	KJN	3.32811	1	7zzr	1	38	6whn; 6who; 6whq; 6wi3; 6whz; 7zzu; 7zzt; 7zzr; 7zzs; 6g3o; 8a0b; 7zzp; 5ix0; 8bpa; 7kbg; 7mot; 7mox; 7moy; 7moz; 8bpb; 7zzo; 8bpc; 7mos; 8c60; 4lxz; 6xeb; 6xdm; 7zzw; 5iwg; 6wbz; 6xec; 4ly1; 7js8; 6wbw; 7ltk; 7ltl; 7ltg; 3max	38	6whn; 6who; 6whq; 6wi3; 6whz; 7zzu; 7zzt; 7zzr; 7zzs; 6g3o; 8a0b; 7zzp; 5ix0; 8bpa; 7kbg; 7mot; 7mox; 7moy; 7moz; 8bpb; 7zzo; 8bpc; 7mos; 8c60; 4lxz; 6xeb; 6xdm; 7zzw; 5iwg; 6wbz; 6xec; 4ly1; 7js8; 6wbw; 7ltk; 7ltl; 7ltg; 3max
					[(2~{r})-1-(dimethylamino)-3-(4-fluorophenyl)-1-oxidanylidene-propan-2-yl]azanium	bound	KIZ	2.84473	1	7zzo	1	38	6whn; 6who; 6whq; 6wi3; 6whz; 7zzu; 7zzt; 7zzr; 7zzs; 6g3o; 8a0b; 7zzp; 5ix0; 8bpa; 7kbg; 7mot; 7mox; 7moy; 7moz; 8bpb; 7zzo; 8bpc; 7mos; 8c60; 4lxz; 6xeb; 6xdm; 7zzw; 5iwg; 6wbz; 6xec; 4ly1; 7js8; 6wbw; 7ltk; 7ltl; 7ltg; 3max	38	6whn; 6who; 6whq; 6wi3; 6whz; 7zzu; 7zzt; 7zzr; 7zzs; 6g3o; 8a0b; 7zzp; 5ix0; 8bpa; 7kbg; 7mot; 7mox; 7moy; 7moz; 8bpb; 7zzo; 8bpc; 7mos; 8c60; 4lxz; 6xeb; 6xdm; 7zzw; 5iwg; 6wbz; 6xec; 4ly1; 7js8; 6wbw; 7ltk; 7ltl; 7ltg; 3max
					[(2~{r})-1-oxidanylidene-4-phenyl-1-pyrrolidin-1-yl-butan-2-yl]azanium	bound	KJF	3.55838	1	7zzt	1	38	6whn; 6who; 6whq; 6wi3; 6whz; 7zzu; 7zzt; 7zzr; 7zzs; 6g3o; 8a0b; 7zzp; 5ix0; 8bpa; 7kbg; 7mot; 7mox; 7moy; 7moz; 8bpb; 7zzo; 8bpc; 7mos; 8c60; 4lxz; 6xeb; 6xdm; 7zzw; 5iwg; 6wbz; 6xec; 4ly1; 7js8; 6wbw; 7ltk; 7ltl; 7ltg; 3max	38	6whn; 6who; 6whq; 6wi3; 6whz; 7zzu; 7zzt; 7zzr; 7zzs; 6g3o; 8a0b; 7zzp; 5ix0; 8bpa; 7kbg; 7mot; 7mox; 7moy; 7moz; 8bpb; 7zzo; 8bpc; 7mos; 8c60; 4lxz; 6xeb; 6xdm; 7zzw; 5iwg; 6wbz; 6xec; 4ly1; 7js8; 6wbw; 7ltk; 7ltl; 7ltg; 3max
					[(2~{r},4~{s})-4-(3-chlorophenyl)pyrrolidin-2-yl]-(4-thieno[2,3-c]pyridin-7-ylpiperazin-1-yl)methanone	bound	KKW	3.34119	1	7zzw	1	38	6whn; 6who; 6whq; 6wi3; 6whz; 7zzu; 7zzt; 7zzr; 7zzs; 6g3o; 8a0b; 7zzp; 5ix0; 8bpa; 7kbg; 7mot; 7mox; 7moy; 7moz; 8bpb; 7zzo; 8bpc; 7mos; 8c60; 4lxz; 6xeb; 6xdm; 7zzw; 5iwg; 6wbz; 6xec; 4ly1; 7js8; 6wbw; 7ltk; 7ltl; 7ltg; 3max	38	6whn; 6who; 6whq; 6wi3; 6whz; 7zzu; 7zzt; 7zzr; 7zzs; 6g3o; 8a0b; 7zzp; 5ix0; 8bpa; 7kbg; 7mot; 7mox; 7moy; 7moz; 8bpb; 7zzo; 8bpc; 7mos; 8c60; 4lxz; 6xeb; 6xdm; 7zzw; 5iwg; 6wbz; 6xec; 4ly1; 7js8; 6wbw; 7ltk; 7ltl; 7ltg; 3max
					n-(4-amino-4'-fluoro[1,1'-biphenyl]-3-yl)oxane-4-carboxamide	bound	IWX	3.43585	1	5iwg	1	38	6whn; 6who; 6whq; 6wi3; 6whz; 7zzu; 7zzt; 7zzr; 7zzs; 6g3o; 8a0b; 7zzp; 5ix0; 8bpa; 7kbg; 7mot; 7mox; 7moy; 7moz; 8bpb; 7zzo; 8bpc; 7mos; 8c60; 4lxz; 6xeb; 6xdm; 7zzw; 5iwg; 6wbz; 6xec; 4ly1; 7js8; 6wbw; 7ltk; 7ltl; 7ltg; 3max	38	6whn; 6who; 6whq; 6wi3; 6whz; 7zzu; 7zzt; 7zzr; 7zzs; 6g3o; 8a0b; 7zzp; 5ix0; 8bpa; 7kbg; 7mot; 7mox; 7moy; 7moz; 8bpb; 7zzo; 8bpc; 7mos; 8c60; 4lxz; 6xeb; 6xdm; 7zzw; 5iwg; 6wbz; 6xec; 4ly1; 7js8; 6wbw; 7ltk; 7ltl; 7ltg; 3max
					n-(4-aminobiphenyl-3-yl)benzamide	bound	LLX	3.37318	1	3max	1	38	6whn; 6who; 6whq; 6wi3; 6whz; 7zzu; 7zzt; 7zzr; 7zzs; 6g3o; 8a0b; 7zzp; 5ix0; 8bpa; 7kbg; 7mot; 7mox; 7moy; 7moz; 8bpb; 7zzo; 8bpc; 7mos; 8c60; 4lxz; 6xeb; 6xdm; 7zzw; 5iwg; 6wbz; 6xec; 4ly1; 7js8; 6wbw; 7ltk; 7ltl; 7ltg; 3max	38	6whn; 6who; 6whq; 6wi3; 6whz; 7zzu; 7zzt; 7zzr; 7zzs; 6g3o; 8a0b; 7zzp; 5ix0; 8bpa; 7kbg; 7mot; 7mox; 7moy; 7moz; 8bpb; 7zzo; 8bpc; 7mos; 8c60; 4lxz; 6xeb; 6xdm; 7zzw; 5iwg; 6wbz; 6xec; 4ly1; 7js8; 6wbw; 7ltk; 7ltl; 7ltg; 3max
					n-[(1s)-1-[4-(2-fluorophenyl)-1h-imidazol-2-yl]-7,7-dihydroxy-7-(1,2-oxazol-3-yl)heptyl]-1-methylazetidine-3-carboxamide	bound	V1D	3.39363	1	6xdm	1	38	6whn; 6who; 6whq; 6wi3; 6whz; 7zzu; 7zzt; 7zzr; 7zzs; 6g3o; 8a0b; 7zzp; 5ix0; 8bpa; 7kbg; 7mot; 7mox; 7moy; 7moz; 8bpb; 7zzo; 8bpc; 7mos; 8c60; 4lxz; 6xeb; 6xdm; 7zzw; 5iwg; 6wbz; 6xec; 4ly1; 7js8; 6wbw; 7ltk; 7ltl; 7ltg; 3max	38	6whn; 6who; 6whq; 6wi3; 6whz; 7zzu; 7zzt; 7zzr; 7zzs; 6g3o; 8a0b; 7zzp; 5ix0; 8bpa; 7kbg; 7mot; 7mox; 7moy; 7moz; 8bpb; 7zzo; 8bpc; 7mos; 8c60; 4lxz; 6xeb; 6xdm; 7zzw; 5iwg; 6wbz; 6xec; 4ly1; 7js8; 6wbw; 7ltk; 7ltl; 7ltg; 3max
					n-{(1s)-1-[5-(2-methoxyquinolin-3-yl)-1h-imidazol-2-yl]pentyl}-1-methylazetidine-3-carboxamide	bound	YEM	6.62479	1	7ltk	1	38	6whn; 6who; 6whq; 6wi3; 6whz; 7zzu; 7zzt; 7zzr; 7zzs; 6g3o; 8a0b; 7zzp; 5ix0; 8bpa; 7kbg; 7mot; 7mox; 7moy; 7moz; 8bpb; 7zzo; 8bpc; 7mos; 8c60; 4lxz; 6xeb; 6xdm; 7zzw; 5iwg; 6wbz; 6xec; 4ly1; 7js8; 6wbw; 7ltk; 7ltl; 7ltg; 3max	38	6whn; 6who; 6whq; 6wi3; 6whz; 7zzu; 7zzt; 7zzr; 7zzs; 6g3o; 8a0b; 7zzp; 5ix0; 8bpa; 7kbg; 7mot; 7mox; 7moy; 7moz; 8bpb; 7zzo; 8bpc; 7mos; 8c60; 4lxz; 6xeb; 6xdm; 7zzw; 5iwg; 6wbz; 6xec; 4ly1; 7js8; 6wbw; 7ltk; 7ltl; 7ltg; 3max
					n-{(1s)-5-[(2-fluoro-6-hydroxybenzene-1-carbonyl)amino]-1-[5-(naphthalen-2-yl)-1h-imidazol-2-yl]pentyl}-1,3-thiazole-5-carboxamide	bound	WBA	3.01484	1	7kbg	1	38	6whn; 6who; 6whq; 6wi3; 6whz; 7zzu; 7zzt; 7zzr; 7zzs; 6g3o; 8a0b; 7zzp; 5ix0; 8bpa; 7kbg; 7mot; 7mox; 7moy; 7moz; 8bpb; 7zzo; 8bpc; 7mos; 8c60; 4lxz; 6xeb; 6xdm; 7zzw; 5iwg; 6wbz; 6xec; 4ly1; 7js8; 6wbw; 7ltk; 7ltl; 7ltg; 3max	38	6whn; 6who; 6whq; 6wi3; 6whz; 7zzu; 7zzt; 7zzr; 7zzs; 6g3o; 8a0b; 7zzp; 5ix0; 8bpa; 7kbg; 7mot; 7mox; 7moy; 7moz; 8bpb; 7zzo; 8bpc; 7mos; 8c60; 4lxz; 6xeb; 6xdm; 7zzw; 5iwg; 6wbz; 6xec; 4ly1; 7js8; 6wbw; 7ltk; 7ltl; 7ltg; 3max
					n-{(1s)-7,7-dihydroxy-1-[5-(2-methoxyquinolin-3-yl)-1h-imidazol-2-yl]nonyl}-1-methylazetidine-3-carboxamide	bound	TV1	3.51122	1	6wbw	1	38	6whn; 6who; 6whq; 6wi3; 6whz; 7zzu; 7zzt; 7zzr; 7zzs; 6g3o; 8a0b; 7zzp; 5ix0; 8bpa; 7kbg; 7mot; 7mox; 7moy; 7moz; 8bpb; 7zzo; 8bpc; 7mos; 8c60; 4lxz; 6xeb; 6xdm; 7zzw; 5iwg; 6wbz; 6xec; 4ly1; 7js8; 6wbw; 7ltk; 7ltl; 7ltg; 3max	38	6whn; 6who; 6whq; 6wi3; 6whz; 7zzu; 7zzt; 7zzr; 7zzs; 6g3o; 8a0b; 7zzp; 5ix0; 8bpa; 7kbg; 7mot; 7mox; 7moy; 7moz; 8bpb; 7zzo; 8bpc; 7mos; 8c60; 4lxz; 6xeb; 6xdm; 7zzw; 5iwg; 6wbz; 6xec; 4ly1; 7js8; 6wbw; 7ltk; 7ltl; 7ltg; 3max
					u2m-asn-hyp-lys-gln-dly-trp-gly peptide macrocycle	polypeptide(L)		7.20205	1	6whz	1	38	6whn; 6who; 6whq; 6wi3; 6whz; 7zzu; 7zzt; 7zzr; 7zzs; 6g3o; 8a0b; 7zzp; 5ix0; 8bpa; 7kbg; 7mot; 7mox; 7moy; 7moz; 8bpb; 7zzo; 8bpc; 7mos; 8c60; 4lxz; 6xeb; 6xdm; 7zzw; 5iwg; 6wbz; 6xec; 4ly1; 7js8; 6wbw; 7ltk; 7ltl; 7ltg; 3max	38	6whn; 6who; 6whq; 6wi3; 6whz; 7zzu; 7zzt; 7zzr; 7zzs; 6g3o; 8a0b; 7zzp; 5ix0; 8bpa; 7kbg; 7mot; 7mox; 7moy; 7moz; 8bpb; 7zzo; 8bpc; 7mos; 8c60; 4lxz; 6xeb; 6xdm; 7zzw; 5iwg; 6wbz; 6xec; 4ly1; 7js8; 6wbw; 7ltk; 7ltl; 7ltg; 3max
					sulfate ion	bound	SO4	6.27031	1	7mos	1	38	6whn; 6who; 6whq; 6wi3; 6whz; 7zzu; 7zzt; 7zzr; 7zzs; 6g3o; 8a0b; 7zzp; 5ix0; 8bpa; 7kbg; 7mot; 7mox; 7moy; 7moz; 8bpb; 7zzo; 8bpc; 7mos; 8c60; 4lxz; 6xeb; 6xdm; 7zzw; 5iwg; 6wbz; 6xec; 4ly1; 7js8; 6wbw; 7ltk; 7ltl; 7ltg; 3max	38	6whn; 6who; 6whq; 6wi3; 6whz; 7zzu; 7zzt; 7zzr; 7zzs; 6g3o; 8a0b; 7zzp; 5ix0; 8bpa; 7kbg; 7mot; 7mox; 7moy; 7moz; 8bpb; 7zzo; 8bpc; 7mos; 8c60; 4lxz; 6xeb; 6xdm; 7zzw; 5iwg; 6wbz; 6xec; 4ly1; 7js8; 6wbw; 7ltk; 7ltl; 7ltg; 3max
			K144T	-5.579	paired amphipathic helix protein sin3b	polypeptide(L)		3.26848	4	8bpa; 8bpb; 8bpc; 8c60	4	38	6whn; 6who; 6whq; 6wi3; 6whz; 7zzu; 7zzt; 7zzr; 7zzs; 6g3o; 8a0b; 7zzp; 5ix0; 8bpa; 7kbg; 7mot; 7mox; 7moy; 7moz; 8bpb; 7zzo; 8bpc; 7mos; 8c60; 4lxz; 6xeb; 6xdm; 7zzw; 5iwg; 6wbz; 6xec; 4ly1; 7js8; 6wbw; 7ltk; 7ltl; 7ltg; 3max	38	6whn; 6who; 6whq; 6wi3; 6whz; 7zzu; 7zzt; 7zzr; 7zzs; 6g3o; 8a0b; 7zzp; 5ix0; 8bpa; 7kbg; 7mot; 7mox; 7moy; 7moz; 8bpb; 7zzo; 8bpc; 7mos; 8c60; 4lxz; 6xeb; 6xdm; 7zzw; 5iwg; 6wbz; 6xec; 4ly1; 7js8; 6wbw; 7ltk; 7ltl; 7ltg; 3max
					mortality factor 4-like protein 1	polypeptide(L)		5.14125	2	8bpa; 8c60	2	38	6whn; 6who; 6whq; 6wi3; 6whz; 7zzu; 7zzt; 7zzr; 7zzs; 6g3o; 8a0b; 7zzp; 5ix0; 8bpa; 7kbg; 7mot; 7mox; 7moy; 7moz; 8bpb; 7zzo; 8bpc; 7mos; 8c60; 4lxz; 6xeb; 6xdm; 7zzw; 5iwg; 6wbz; 6xec; 4ly1; 7js8; 6wbw; 7ltk; 7ltl; 7ltg; 3max	38	6whn; 6who; 6whq; 6wi3; 6whz; 7zzu; 7zzt; 7zzr; 7zzs; 6g3o; 8a0b; 7zzp; 5ix0; 8bpa; 7kbg; 7mot; 7mox; 7moy; 7moz; 8bpb; 7zzo; 8bpc; 7mos; 8c60; 4lxz; 6xeb; 6xdm; 7zzw; 5iwg; 6wbz; 6xec; 4ly1; 7js8; 6wbw; 7ltk; 7ltl; 7ltg; 3max
					sulfate ion	bound	SO4	5.33217	2	6g3o; 7ltl	2	38	6whn; 6who; 6whq; 6wi3; 6whz; 7zzu; 7zzt; 7zzr; 7zzs; 6g3o; 8a0b; 7zzp; 5ix0; 8bpa; 7kbg; 7mot; 7mox; 7moy; 7moz; 8bpb; 7zzo; 8bpc; 7mos; 8c60; 4lxz; 6xeb; 6xdm; 7zzw; 5iwg; 6wbz; 6xec; 4ly1; 7js8; 6wbw; 7ltk; 7ltl; 7ltg; 3max	38	6whn; 6who; 6whq; 6wi3; 6whz; 7zzu; 7zzt; 7zzr; 7zzs; 6g3o; 8a0b; 7zzp; 5ix0; 8bpa; 7kbg; 7mot; 7mox; 7moy; 7moz; 8bpb; 7zzo; 8bpc; 7mos; 8c60; 4lxz; 6xeb; 6xdm; 7zzw; 5iwg; 6wbz; 6xec; 4ly1; 7js8; 6wbw; 7ltk; 7ltl; 7ltg; 3max
					(sha)w(dth)dn(dsn)(dme)(das)k peptide macrocycle	polypeptide(L)		6.13728	1	6wi3	1	38	6whn; 6who; 6whq; 6wi3; 6whz; 7zzu; 7zzt; 7zzr; 7zzs; 6g3o; 8a0b; 7zzp; 5ix0; 8bpa; 7kbg; 7mot; 7mox; 7moy; 7moz; 8bpb; 7zzo; 8bpc; 7mos; 8c60; 4lxz; 6xeb; 6xdm; 7zzw; 5iwg; 6wbz; 6xec; 4ly1; 7js8; 6wbw; 7ltk; 7ltl; 7ltg; 3max	38	6whn; 6who; 6whq; 6wi3; 6whz; 7zzu; 7zzt; 7zzr; 7zzs; 6g3o; 8a0b; 7zzp; 5ix0; 8bpa; 7kbg; 7mot; 7mox; 7moy; 7moz; 8bpb; 7zzo; 8bpc; 7mos; 8c60; 4lxz; 6xeb; 6xdm; 7zzw; 5iwg; 6wbz; 6xec; 4ly1; 7js8; 6wbw; 7ltk; 7ltl; 7ltg; 3max
			C101Y	-5.49	octanedioic acid hydroxyamide phenylamide	bound	SHH	5.49944	3	7zzs; 8bpc; 4lxz	3	38	6whn; 6who; 6whq; 6wi3; 6whz; 7zzu; 7zzt; 7zzr; 7zzs; 6g3o; 8a0b; 7zzp; 5ix0; 8bpa; 7kbg; 7mot; 7mox; 7moy; 7moz; 8bpb; 7zzo; 8bpc; 7mos; 8c60; 4lxz; 6xeb; 6xdm; 7zzw; 5iwg; 6wbz; 6xec; 4ly1; 7js8; 6wbw; 7ltk; 7ltl; 7ltg; 3max	38	6whn; 6who; 6whq; 6wi3; 6whz; 7zzu; 7zzt; 7zzr; 7zzs; 6g3o; 8a0b; 7zzp; 5ix0; 8bpa; 7kbg; 7mot; 7mox; 7moy; 7moz; 8bpb; 7zzo; 8bpc; 7mos; 8c60; 4lxz; 6xeb; 6xdm; 7zzw; 5iwg; 6wbz; 6xec; 4ly1; 7js8; 6wbw; 7ltk; 7ltl; 7ltg; 3max
					u2m-asn-pro-glu-gln-dly-trp-gly peptide macrocycle	polypeptide(L)		6.30813	2	6who; 6whq	2	38	6whn; 6who; 6whq; 6wi3; 6whz; 7zzu; 7zzt; 7zzr; 7zzs; 6g3o; 8a0b; 7zzp; 5ix0; 8bpa; 7kbg; 7mot; 7mox; 7moy; 7moz; 8bpb; 7zzo; 8bpc; 7mos; 8c60; 4lxz; 6xeb; 6xdm; 7zzw; 5iwg; 6wbz; 6xec; 4ly1; 7js8; 6wbw; 7ltk; 7ltl; 7ltg; 3max	38	6whn; 6who; 6whq; 6wi3; 6whz; 7zzu; 7zzt; 7zzr; 7zzs; 6g3o; 8a0b; 7zzp; 5ix0; 8bpa; 7kbg; 7mot; 7mox; 7moy; 7moz; 8bpb; 7zzo; 8bpc; 7mos; 8c60; 4lxz; 6xeb; 6xdm; 7zzw; 5iwg; 6wbz; 6xec; 4ly1; 7js8; 6wbw; 7ltk; 7ltl; 7ltg; 3max
					5-{(1s)-7,7-dihydroxy-1-[(1-methylazetidine-3-carbonyl)amino]nonyl}-2-phenyl-1h-imidazole-4-carboxamide	bound	V1P	6.6211	2	7mot; 6xeb	2	38	6whn; 6who; 6whq; 6wi3; 6whz; 7zzu; 7zzt; 7zzr; 7zzs; 6g3o; 8a0b; 7zzp; 5ix0; 8bpa; 7kbg; 7mot; 7mox; 7moy; 7moz; 8bpb; 7zzo; 8bpc; 7mos; 8c60; 4lxz; 6xeb; 6xdm; 7zzw; 5iwg; 6wbz; 6xec; 4ly1; 7js8; 6wbw; 7ltk; 7ltl; 7ltg; 3max	38	6whn; 6who; 6whq; 6wi3; 6whz; 7zzu; 7zzt; 7zzr; 7zzs; 6g3o; 8a0b; 7zzp; 5ix0; 8bpa; 7kbg; 7mot; 7mox; 7moy; 7moz; 8bpb; 7zzo; 8bpc; 7mos; 8c60; 4lxz; 6xeb; 6xdm; 7zzw; 5iwg; 6wbz; 6xec; 4ly1; 7js8; 6wbw; 7ltk; 7ltl; 7ltg; 3max
					paired amphipathic helix protein sin3b	polypeptide(L)		7.79463	2	8bpb; 8c60	2	38	6whn; 6who; 6whq; 6wi3; 6whz; 7zzu; 7zzt; 7zzr; 7zzs; 6g3o; 8a0b; 7zzp; 5ix0; 8bpa; 7kbg; 7mot; 7mox; 7moy; 7moz; 8bpb; 7zzo; 8bpc; 7mos; 8c60; 4lxz; 6xeb; 6xdm; 7zzw; 5iwg; 6wbz; 6xec; 4ly1; 7js8; 6wbw; 7ltk; 7ltl; 7ltg; 3max	38	6whn; 6who; 6whq; 6wi3; 6whz; 7zzu; 7zzt; 7zzr; 7zzs; 6g3o; 8a0b; 7zzp; 5ix0; 8bpa; 7kbg; 7mot; 7mox; 7moy; 7moz; 8bpb; 7zzo; 8bpc; 7mos; 8c60; 4lxz; 6xeb; 6xdm; 7zzw; 5iwg; 6wbz; 6xec; 4ly1; 7js8; 6wbw; 7ltk; 7ltl; 7ltg; 3max
					(sha)w(dth)dn(dsn)(dme)(das)k peptide macrocycle	polypeptide(L)		7.38979	1	6wi3	1	38	6whn; 6who; 6whq; 6wi3; 6whz; 7zzu; 7zzt; 7zzr; 7zzs; 6g3o; 8a0b; 7zzp; 5ix0; 8bpa; 7kbg; 7mot; 7mox; 7moy; 7moz; 8bpb; 7zzo; 8bpc; 7mos; 8c60; 4lxz; 6xeb; 6xdm; 7zzw; 5iwg; 6wbz; 6xec; 4ly1; 7js8; 6wbw; 7ltk; 7ltl; 7ltg; 3max	38	6whn; 6who; 6whq; 6wi3; 6whz; 7zzu; 7zzt; 7zzr; 7zzs; 6g3o; 8a0b; 7zzp; 5ix0; 8bpa; 7kbg; 7mot; 7mox; 7moy; 7moz; 8bpb; 7zzo; 8bpc; 7mos; 8c60; 4lxz; 6xeb; 6xdm; 7zzw; 5iwg; 6wbz; 6xec; 4ly1; 7js8; 6wbw; 7ltk; 7ltl; 7ltg; 3max
					u2m-asn-pro-lys-gln-dly-trp-gly peptide macrocycle	polypeptide(L)		5.82025	1	6whn	1	38	6whn; 6who; 6whq; 6wi3; 6whz; 7zzu; 7zzt; 7zzr; 7zzs; 6g3o; 8a0b; 7zzp; 5ix0; 8bpa; 7kbg; 7mot; 7mox; 7moy; 7moz; 8bpb; 7zzo; 8bpc; 7mos; 8c60; 4lxz; 6xeb; 6xdm; 7zzw; 5iwg; 6wbz; 6xec; 4ly1; 7js8; 6wbw; 7ltk; 7ltl; 7ltg; 3max	38	6whn; 6who; 6whq; 6wi3; 6whz; 7zzu; 7zzt; 7zzr; 7zzs; 6g3o; 8a0b; 7zzp; 5ix0; 8bpa; 7kbg; 7mot; 7mox; 7moy; 7moz; 8bpb; 7zzo; 8bpc; 7mos; 8c60; 4lxz; 6xeb; 6xdm; 7zzw; 5iwg; 6wbz; 6xec; 4ly1; 7js8; 6wbw; 7ltk; 7ltl; 7ltg; 3max
					(1r,3s,6s,18r,27r)-6-(6,6-dihydroxyoctyl)-5,8,18,27,34-pentaazahexacyclo[25.2.2.1~7,10~.1~11,15~.1~14,18~.0~1,3~]tetratriaconta-7,9,11(33),12,14,16-hexaene-4,32-dione (non-preferred name)	bound	ZL4	6.5199	1	7moz	1	38	6whn; 6who; 6whq; 6wi3; 6whz; 7zzu; 7zzt; 7zzr; 7zzs; 6g3o; 8a0b; 7zzp; 5ix0; 8bpa; 7kbg; 7mot; 7mox; 7moy; 7moz; 8bpb; 7zzo; 8bpc; 7mos; 8c60; 4lxz; 6xeb; 6xdm; 7zzw; 5iwg; 6wbz; 6xec; 4ly1; 7js8; 6wbw; 7ltk; 7ltl; 7ltg; 3max	38	6whn; 6who; 6whq; 6wi3; 6whz; 7zzu; 7zzt; 7zzr; 7zzs; 6g3o; 8a0b; 7zzp; 5ix0; 8bpa; 7kbg; 7mot; 7mox; 7moy; 7moz; 8bpb; 7zzo; 8bpc; 7mos; 8c60; 4lxz; 6xeb; 6xdm; 7zzw; 5iwg; 6wbz; 6xec; 4ly1; 7js8; 6wbw; 7ltk; 7ltl; 7ltg; 3max
					(1s)-6-ethyl-n-{(1s)-1-[5-(2-ethyl-1-oxo-1,2-dihydroisoquinolin-6-yl)-1h-imidazol-2-yl]-7,7-dihydroxynonyl}-6-azaspiro[2.5]octane-1-carboxamide	bound	ZLM	6.39664	1	7moy	1	38	6whn; 6who; 6whq; 6wi3; 6whz; 7zzu; 7zzt; 7zzr; 7zzs; 6g3o; 8a0b; 7zzp; 5ix0; 8bpa; 7kbg; 7mot; 7mox; 7moy; 7moz; 8bpb; 7zzo; 8bpc; 7mos; 8c60; 4lxz; 6xeb; 6xdm; 7zzw; 5iwg; 6wbz; 6xec; 4ly1; 7js8; 6wbw; 7ltk; 7ltl; 7ltg; 3max	38	6whn; 6who; 6whq; 6wi3; 6whz; 7zzu; 7zzt; 7zzr; 7zzs; 6g3o; 8a0b; 7zzp; 5ix0; 8bpa; 7kbg; 7mot; 7mox; 7moy; 7moz; 8bpb; 7zzo; 8bpc; 7mos; 8c60; 4lxz; 6xeb; 6xdm; 7zzw; 5iwg; 6wbz; 6xec; 4ly1; 7js8; 6wbw; 7ltk; 7ltl; 7ltg; 3max
					(1s)-n-[(1s)-7,7-dihydroxy-1-{4-[(1r,4s)-1,2,3,4-tetrahydro-1,4-methanonaphthalen-6-yl]-1h-imidazol-2-yl}nonyl]-6-methyl-6-azaspiro[2.5]octane-1-carboxamide	bound	ZLS	6.57249	1	7mox	1	38	6whn; 6who; 6whq; 6wi3; 6whz; 7zzu; 7zzt; 7zzr; 7zzs; 6g3o; 8a0b; 7zzp; 5ix0; 8bpa; 7kbg; 7mot; 7mox; 7moy; 7moz; 8bpb; 7zzo; 8bpc; 7mos; 8c60; 4lxz; 6xeb; 6xdm; 7zzw; 5iwg; 6wbz; 6xec; 4ly1; 7js8; 6wbw; 7ltk; 7ltl; 7ltg; 3max	38	6whn; 6who; 6whq; 6wi3; 6whz; 7zzu; 7zzt; 7zzr; 7zzs; 6g3o; 8a0b; 7zzp; 5ix0; 8bpa; 7kbg; 7mot; 7mox; 7moy; 7moz; 8bpb; 7zzo; 8bpc; 7mos; 8c60; 4lxz; 6xeb; 6xdm; 7zzw; 5iwg; 6wbz; 6xec; 4ly1; 7js8; 6wbw; 7ltk; 7ltl; 7ltg; 3max
					(1s)-n-{(1s)-1-[5-cyano-2-(4-fluorophenyl)-1h-imidazol-4-yl]-7,7-dihydroxynonyl}-6-methyl-6-azaspiro[2.5]octane-1-carboxamide	bound	V1S	6.44002	1	6xec	1	38	6whn; 6who; 6whq; 6wi3; 6whz; 7zzu; 7zzt; 7zzr; 7zzs; 6g3o; 8a0b; 7zzp; 5ix0; 8bpa; 7kbg; 7mot; 7mox; 7moy; 7moz; 8bpb; 7zzo; 8bpc; 7mos; 8c60; 4lxz; 6xeb; 6xdm; 7zzw; 5iwg; 6wbz; 6xec; 4ly1; 7js8; 6wbw; 7ltk; 7ltl; 7ltg; 3max	38	6whn; 6who; 6whq; 6wi3; 6whz; 7zzu; 7zzt; 7zzr; 7zzs; 6g3o; 8a0b; 7zzp; 5ix0; 8bpa; 7kbg; 7mot; 7mox; 7moy; 7moz; 8bpb; 7zzo; 8bpc; 7mos; 8c60; 4lxz; 6xeb; 6xdm; 7zzw; 5iwg; 6wbz; 6xec; 4ly1; 7js8; 6wbw; 7ltk; 7ltl; 7ltg; 3max
					(1s)-n-{(1s)-7,7-dihydroxy-1-[4-(2-methylquinolin-6-yl)-1h-imidazol-2-yl]nonyl}-6-methyl-6-azaspiro[2.5]octane-1-carboxamide	bound	VJV	6.36069	1	7js8	1	38	6whn; 6who; 6whq; 6wi3; 6whz; 7zzu; 7zzt; 7zzr; 7zzs; 6g3o; 8a0b; 7zzp; 5ix0; 8bpa; 7kbg; 7mot; 7mox; 7moy; 7moz; 8bpb; 7zzo; 8bpc; 7mos; 8c60; 4lxz; 6xeb; 6xdm; 7zzw; 5iwg; 6wbz; 6xec; 4ly1; 7js8; 6wbw; 7ltk; 7ltl; 7ltg; 3max	38	6whn; 6who; 6whq; 6wi3; 6whz; 7zzu; 7zzt; 7zzr; 7zzs; 6g3o; 8a0b; 7zzp; 5ix0; 8bpa; 7kbg; 7mot; 7mox; 7moy; 7moz; 8bpb; 7zzo; 8bpc; 7mos; 8c60; 4lxz; 6xeb; 6xdm; 7zzw; 5iwg; 6wbz; 6xec; 4ly1; 7js8; 6wbw; 7ltk; 7ltl; 7ltg; 3max
					(1s)-n-{(1s)-7,7-dihydroxy-1-[5-(2-methoxyquinolin-3-yl)-1h-imidazol-2-yl]nonyl}-6-ethyl-6-azaspiro[2.5]octane-1-carboxamide	bound	TV7	6.36465	1	6wbz	1	38	6whn; 6who; 6whq; 6wi3; 6whz; 7zzu; 7zzt; 7zzr; 7zzs; 6g3o; 8a0b; 7zzp; 5ix0; 8bpa; 7kbg; 7mot; 7mox; 7moy; 7moz; 8bpb; 7zzo; 8bpc; 7mos; 8c60; 4lxz; 6xeb; 6xdm; 7zzw; 5iwg; 6wbz; 6xec; 4ly1; 7js8; 6wbw; 7ltk; 7ltl; 7ltg; 3max	38	6whn; 6who; 6whq; 6wi3; 6whz; 7zzu; 7zzt; 7zzr; 7zzs; 6g3o; 8a0b; 7zzp; 5ix0; 8bpa; 7kbg; 7mot; 7mox; 7moy; 7moz; 8bpb; 7zzo; 8bpc; 7mos; 8c60; 4lxz; 6xeb; 6xdm; 7zzw; 5iwg; 6wbz; 6xec; 4ly1; 7js8; 6wbw; 7ltk; 7ltl; 7ltg; 3max
					(2r)-2-(5-hydroxy-2-methyl-1h-indol-3-yl)-n-{(1s)-1-[5-(2-methoxyquinolin-3-yl)-1h-imidazol-2-yl]pentyl}propanamide	bound	YEV	6.01417	1	7ltl	1	38	6whn; 6who; 6whq; 6wi3; 6whz; 7zzu; 7zzt; 7zzr; 7zzs; 6g3o; 8a0b; 7zzp; 5ix0; 8bpa; 7kbg; 7mot; 7mox; 7moy; 7moz; 8bpb; 7zzo; 8bpc; 7mos; 8c60; 4lxz; 6xeb; 6xdm; 7zzw; 5iwg; 6wbz; 6xec; 4ly1; 7js8; 6wbw; 7ltk; 7ltl; 7ltg; 3max	38	6whn; 6who; 6whq; 6wi3; 6whz; 7zzu; 7zzt; 7zzr; 7zzs; 6g3o; 8a0b; 7zzp; 5ix0; 8bpa; 7kbg; 7mot; 7mox; 7moy; 7moz; 8bpb; 7zzo; 8bpc; 7mos; 8c60; 4lxz; 6xeb; 6xdm; 7zzw; 5iwg; 6wbz; 6xec; 4ly1; 7js8; 6wbw; 7ltk; 7ltl; 7ltg; 3max
					(3-exo)-n-(4-amino-4'-fluoro[1,1'-biphenyl]-3-yl)-8-oxabicyclo[3.2.1]octane-3-carboxamide	bound	6EZ	7.49645	1	5ix0	1	38	6whn; 6who; 6whq; 6wi3; 6whz; 7zzu; 7zzt; 7zzr; 7zzs; 6g3o; 8a0b; 7zzp; 5ix0; 8bpa; 7kbg; 7mot; 7mox; 7moy; 7moz; 8bpb; 7zzo; 8bpc; 7mos; 8c60; 4lxz; 6xeb; 6xdm; 7zzw; 5iwg; 6wbz; 6xec; 4ly1; 7js8; 6wbw; 7ltk; 7ltl; 7ltg; 3max	38	6whn; 6who; 6whq; 6wi3; 6whz; 7zzu; 7zzt; 7zzr; 7zzs; 6g3o; 8a0b; 7zzp; 5ix0; 8bpa; 7kbg; 7mot; 7mox; 7moy; 7moz; 8bpb; 7zzo; 8bpc; 7mos; 8c60; 4lxz; 6xeb; 6xdm; 7zzw; 5iwg; 6wbz; 6xec; 4ly1; 7js8; 6wbw; 7ltk; 7ltl; 7ltg; 3max
					(3s,18s,20ar)-18-(6,6-dihydroxyoctyl)-1,5,6,7,8,18,19,20a-octahydro-4h-14,17-epiminoazeto[1,2-g][1,7,10,13]benzoxatriazacycloheptadecin-20(2h)-one	bound	ZLV	6.35544	1	7mos	1	38	6whn; 6who; 6whq; 6wi3; 6whz; 7zzu; 7zzt; 7zzr; 7zzs; 6g3o; 8a0b; 7zzp; 5ix0; 8bpa; 7kbg; 7mot; 7mox; 7moy; 7moz; 8bpb; 7zzo; 8bpc; 7mos; 8c60; 4lxz; 6xeb; 6xdm; 7zzw; 5iwg; 6wbz; 6xec; 4ly1; 7js8; 6wbw; 7ltk; 7ltl; 7ltg; 3max	38	6whn; 6who; 6whq; 6wi3; 6whz; 7zzu; 7zzt; 7zzr; 7zzs; 6g3o; 8a0b; 7zzp; 5ix0; 8bpa; 7kbg; 7mot; 7mox; 7moy; 7moz; 8bpb; 7zzo; 8bpc; 7mos; 8c60; 4lxz; 6xeb; 6xdm; 7zzw; 5iwg; 6wbz; 6xec; 4ly1; 7js8; 6wbw; 7ltk; 7ltl; 7ltg; 3max
					(3s,6s,9s,15ar)-9-[(2s)-butan-2-yl]-3-(6,6-dihydroxyoctyl)-6-[(1-methoxy-1h-indol-3-yl)methyl]octahydro-2h-pyrido[1,2-a][1,4,7,10]tetraazacyclododecine-1,4,7,10(3h,12h)-tetrone	bound	YED	6.47501	1	7ltg	1	38	6whn; 6who; 6whq; 6wi3; 6whz; 7zzu; 7zzt; 7zzr; 7zzs; 6g3o; 8a0b; 7zzp; 5ix0; 8bpa; 7kbg; 7mot; 7mox; 7moy; 7moz; 8bpb; 7zzo; 8bpc; 7mos; 8c60; 4lxz; 6xeb; 6xdm; 7zzw; 5iwg; 6wbz; 6xec; 4ly1; 7js8; 6wbw; 7ltk; 7ltl; 7ltg; 3max	38	6whn; 6who; 6whq; 6wi3; 6whz; 7zzu; 7zzt; 7zzr; 7zzs; 6g3o; 8a0b; 7zzp; 5ix0; 8bpa; 7kbg; 7mot; 7mox; 7moy; 7moz; 8bpb; 7zzo; 8bpc; 7mos; 8c60; 4lxz; 6xeb; 6xdm; 7zzw; 5iwg; 6wbz; 6xec; 4ly1; 7js8; 6wbw; 7ltk; 7ltl; 7ltg; 3max
					(5~{s})-5-(4-chlorophenyl)pyrrolidin-2-one	bound	KK0	7.0759	1	7zzs	1	38	6whn; 6who; 6whq; 6wi3; 6whz; 7zzu; 7zzt; 7zzr; 7zzs; 6g3o; 8a0b; 7zzp; 5ix0; 8bpa; 7kbg; 7mot; 7mox; 7moy; 7moz; 8bpb; 7zzo; 8bpc; 7mos; 8c60; 4lxz; 6xeb; 6xdm; 7zzw; 5iwg; 6wbz; 6xec; 4ly1; 7js8; 6wbw; 7ltk; 7ltl; 7ltg; 3max	38	6whn; 6who; 6whq; 6wi3; 6whz; 7zzu; 7zzt; 7zzr; 7zzs; 6g3o; 8a0b; 7zzp; 5ix0; 8bpa; 7kbg; 7mot; 7mox; 7moy; 7moz; 8bpb; 7zzo; 8bpc; 7mos; 8c60; 4lxz; 6xeb; 6xdm; 7zzw; 5iwg; 6wbz; 6xec; 4ly1; 7js8; 6wbw; 7ltk; 7ltl; 7ltg; 3max
					(6~{r})-6-[[3,4-bis(oxidanylidene)-2-[[4-(trifluoromethyloxy)phenyl]amino]cyclobuten-1-yl]amino]-~{n}-oxidanyl-heptanamide	bound	EL8	6.26357	1	6g3o	1	38	6whn; 6who; 6whq; 6wi3; 6whz; 7zzu; 7zzt; 7zzr; 7zzs; 6g3o; 8a0b; 7zzp; 5ix0; 8bpa; 7kbg; 7mot; 7mox; 7moy; 7moz; 8bpb; 7zzo; 8bpc; 7mos; 8c60; 4lxz; 6xeb; 6xdm; 7zzw; 5iwg; 6wbz; 6xec; 4ly1; 7js8; 6wbw; 7ltk; 7ltl; 7ltg; 3max	38	6whn; 6who; 6whq; 6wi3; 6whz; 7zzu; 7zzt; 7zzr; 7zzs; 6g3o; 8a0b; 7zzp; 5ix0; 8bpa; 7kbg; 7mot; 7mox; 7moy; 7moz; 8bpb; 7zzo; 8bpc; 7mos; 8c60; 4lxz; 6xeb; 6xdm; 7zzw; 5iwg; 6wbz; 6xec; 4ly1; 7js8; 6wbw; 7ltk; 7ltl; 7ltg; 3max
					1,3-dihydroisoindol-2-yl-[(2r,4s)-4-phenylpyrrolidin-1-ium-2-yl]methanone	bound	KRU	6.80413	1	8a0b	1	38	6whn; 6who; 6whq; 6wi3; 6whz; 7zzu; 7zzt; 7zzr; 7zzs; 6g3o; 8a0b; 7zzp; 5ix0; 8bpa; 7kbg; 7mot; 7mox; 7moy; 7moz; 8bpb; 7zzo; 8bpc; 7mos; 8c60; 4lxz; 6xeb; 6xdm; 7zzw; 5iwg; 6wbz; 6xec; 4ly1; 7js8; 6wbw; 7ltk; 7ltl; 7ltg; 3max	38	6whn; 6who; 6whq; 6wi3; 6whz; 7zzu; 7zzt; 7zzr; 7zzs; 6g3o; 8a0b; 7zzp; 5ix0; 8bpa; 7kbg; 7mot; 7mox; 7moy; 7moz; 8bpb; 7zzo; 8bpc; 7mos; 8c60; 4lxz; 6xeb; 6xdm; 7zzw; 5iwg; 6wbz; 6xec; 4ly1; 7js8; 6wbw; 7ltk; 7ltl; 7ltg; 3max
					2-[4-[(2~{r},4~{s})-4-phenylpyrrolidin-2-yl]carbonylpiperazin-1-yl]pyridine-3-carbonitrile	bound	KKI	5.34116	1	7zzu	1	38	6whn; 6who; 6whq; 6wi3; 6whz; 7zzu; 7zzt; 7zzr; 7zzs; 6g3o; 8a0b; 7zzp; 5ix0; 8bpa; 7kbg; 7mot; 7mox; 7moy; 7moz; 8bpb; 7zzo; 8bpc; 7mos; 8c60; 4lxz; 6xeb; 6xdm; 7zzw; 5iwg; 6wbz; 6xec; 4ly1; 7js8; 6wbw; 7ltk; 7ltl; 7ltg; 3max	38	6whn; 6who; 6whq; 6wi3; 6whz; 7zzu; 7zzt; 7zzr; 7zzs; 6g3o; 8a0b; 7zzp; 5ix0; 8bpa; 7kbg; 7mot; 7mox; 7moy; 7moz; 8bpb; 7zzo; 8bpc; 7mos; 8c60; 4lxz; 6xeb; 6xdm; 7zzw; 5iwg; 6wbz; 6xec; 4ly1; 7js8; 6wbw; 7ltk; 7ltl; 7ltg; 3max
					4-(acetylamino)-n-[2-amino-5-(thiophen-2-yl)phenyl]benzamide	bound	20Y	7.57808	1	4ly1	1	38	6whn; 6who; 6whq; 6wi3; 6whz; 7zzu; 7zzt; 7zzr; 7zzs; 6g3o; 8a0b; 7zzp; 5ix0; 8bpa; 7kbg; 7mot; 7mox; 7moy; 7moz; 8bpb; 7zzo; 8bpc; 7mos; 8c60; 4lxz; 6xeb; 6xdm; 7zzw; 5iwg; 6wbz; 6xec; 4ly1; 7js8; 6wbw; 7ltk; 7ltl; 7ltg; 3max	38	6whn; 6who; 6whq; 6wi3; 6whz; 7zzu; 7zzt; 7zzr; 7zzs; 6g3o; 8a0b; 7zzp; 5ix0; 8bpa; 7kbg; 7mot; 7mox; 7moy; 7moz; 8bpb; 7zzo; 8bpc; 7mos; 8c60; 4lxz; 6xeb; 6xdm; 7zzw; 5iwg; 6wbz; 6xec; 4ly1; 7js8; 6wbw; 7ltk; 7ltl; 7ltg; 3max
					6-methyl-4-oxidanyl-pyran-2-one	bound	KJ6	5.91696	1	7zzp	1	38	6whn; 6who; 6whq; 6wi3; 6whz; 7zzu; 7zzt; 7zzr; 7zzs; 6g3o; 8a0b; 7zzp; 5ix0; 8bpa; 7kbg; 7mot; 7mox; 7moy; 7moz; 8bpb; 7zzo; 8bpc; 7mos; 8c60; 4lxz; 6xeb; 6xdm; 7zzw; 5iwg; 6wbz; 6xec; 4ly1; 7js8; 6wbw; 7ltk; 7ltl; 7ltg; 3max	38	6whn; 6who; 6whq; 6wi3; 6whz; 7zzu; 7zzt; 7zzr; 7zzs; 6g3o; 8a0b; 7zzp; 5ix0; 8bpa; 7kbg; 7mot; 7mox; 7moy; 7moz; 8bpb; 7zzo; 8bpc; 7mos; 8c60; 4lxz; 6xeb; 6xdm; 7zzw; 5iwg; 6wbz; 6xec; 4ly1; 7js8; 6wbw; 7ltk; 7ltl; 7ltg; 3max
					[(2~{r})-1-(dimethylamino)-1-oxidanylidene-4-phenyl-butan-2-yl]azanium	bound	KJN	6.7326	1	7zzr	1	38	6whn; 6who; 6whq; 6wi3; 6whz; 7zzu; 7zzt; 7zzr; 7zzs; 6g3o; 8a0b; 7zzp; 5ix0; 8bpa; 7kbg; 7mot; 7mox; 7moy; 7moz; 8bpb; 7zzo; 8bpc; 7mos; 8c60; 4lxz; 6xeb; 6xdm; 7zzw; 5iwg; 6wbz; 6xec; 4ly1; 7js8; 6wbw; 7ltk; 7ltl; 7ltg; 3max	38	6whn; 6who; 6whq; 6wi3; 6whz; 7zzu; 7zzt; 7zzr; 7zzs; 6g3o; 8a0b; 7zzp; 5ix0; 8bpa; 7kbg; 7mot; 7mox; 7moy; 7moz; 8bpb; 7zzo; 8bpc; 7mos; 8c60; 4lxz; 6xeb; 6xdm; 7zzw; 5iwg; 6wbz; 6xec; 4ly1; 7js8; 6wbw; 7ltk; 7ltl; 7ltg; 3max
					[(2~{r})-1-(dimethylamino)-3-(4-fluorophenyl)-1-oxidanylidene-propan-2-yl]azanium	bound	KIZ	7.04942	1	7zzo	1	38	6whn; 6who; 6whq; 6wi3; 6whz; 7zzu; 7zzt; 7zzr; 7zzs; 6g3o; 8a0b; 7zzp; 5ix0; 8bpa; 7kbg; 7mot; 7mox; 7moy; 7moz; 8bpb; 7zzo; 8bpc; 7mos; 8c60; 4lxz; 6xeb; 6xdm; 7zzw; 5iwg; 6wbz; 6xec; 4ly1; 7js8; 6wbw; 7ltk; 7ltl; 7ltg; 3max	38	6whn; 6who; 6whq; 6wi3; 6whz; 7zzu; 7zzt; 7zzr; 7zzs; 6g3o; 8a0b; 7zzp; 5ix0; 8bpa; 7kbg; 7mot; 7mox; 7moy; 7moz; 8bpb; 7zzo; 8bpc; 7mos; 8c60; 4lxz; 6xeb; 6xdm; 7zzw; 5iwg; 6wbz; 6xec; 4ly1; 7js8; 6wbw; 7ltk; 7ltl; 7ltg; 3max
					[(2~{r})-1-oxidanylidene-4-phenyl-1-pyrrolidin-1-yl-butan-2-yl]azanium	bound	KJF	6.71076	1	7zzt	1	38	6whn; 6who; 6whq; 6wi3; 6whz; 7zzu; 7zzt; 7zzr; 7zzs; 6g3o; 8a0b; 7zzp; 5ix0; 8bpa; 7kbg; 7mot; 7mox; 7moy; 7moz; 8bpb; 7zzo; 8bpc; 7mos; 8c60; 4lxz; 6xeb; 6xdm; 7zzw; 5iwg; 6wbz; 6xec; 4ly1; 7js8; 6wbw; 7ltk; 7ltl; 7ltg; 3max	38	6whn; 6who; 6whq; 6wi3; 6whz; 7zzu; 7zzt; 7zzr; 7zzs; 6g3o; 8a0b; 7zzp; 5ix0; 8bpa; 7kbg; 7mot; 7mox; 7moy; 7moz; 8bpb; 7zzo; 8bpc; 7mos; 8c60; 4lxz; 6xeb; 6xdm; 7zzw; 5iwg; 6wbz; 6xec; 4ly1; 7js8; 6wbw; 7ltk; 7ltl; 7ltg; 3max
					[(2~{r},4~{s})-4-(3-chlorophenyl)pyrrolidin-2-yl]-(4-thieno[2,3-c]pyridin-7-ylpiperazin-1-yl)methanone	bound	KKW	6.44381	1	7zzw	1	38	6whn; 6who; 6whq; 6wi3; 6whz; 7zzu; 7zzt; 7zzr; 7zzs; 6g3o; 8a0b; 7zzp; 5ix0; 8bpa; 7kbg; 7mot; 7mox; 7moy; 7moz; 8bpb; 7zzo; 8bpc; 7mos; 8c60; 4lxz; 6xeb; 6xdm; 7zzw; 5iwg; 6wbz; 6xec; 4ly1; 7js8; 6wbw; 7ltk; 7ltl; 7ltg; 3max	38	6whn; 6who; 6whq; 6wi3; 6whz; 7zzu; 7zzt; 7zzr; 7zzs; 6g3o; 8a0b; 7zzp; 5ix0; 8bpa; 7kbg; 7mot; 7mox; 7moy; 7moz; 8bpb; 7zzo; 8bpc; 7mos; 8c60; 4lxz; 6xeb; 6xdm; 7zzw; 5iwg; 6wbz; 6xec; 4ly1; 7js8; 6wbw; 7ltk; 7ltl; 7ltg; 3max
					n-(4-amino-4'-fluoro[1,1'-biphenyl]-3-yl)oxane-4-carboxamide	bound	IWX	7.5035	1	5iwg	1	38	6whn; 6who; 6whq; 6wi3; 6whz; 7zzu; 7zzt; 7zzr; 7zzs; 6g3o; 8a0b; 7zzp; 5ix0; 8bpa; 7kbg; 7mot; 7mox; 7moy; 7moz; 8bpb; 7zzo; 8bpc; 7mos; 8c60; 4lxz; 6xeb; 6xdm; 7zzw; 5iwg; 6wbz; 6xec; 4ly1; 7js8; 6wbw; 7ltk; 7ltl; 7ltg; 3max	38	6whn; 6who; 6whq; 6wi3; 6whz; 7zzu; 7zzt; 7zzr; 7zzs; 6g3o; 8a0b; 7zzp; 5ix0; 8bpa; 7kbg; 7mot; 7mox; 7moy; 7moz; 8bpb; 7zzo; 8bpc; 7mos; 8c60; 4lxz; 6xeb; 6xdm; 7zzw; 5iwg; 6wbz; 6xec; 4ly1; 7js8; 6wbw; 7ltk; 7ltl; 7ltg; 3max
					n-(4-aminobiphenyl-3-yl)benzamide	bound	LLX	7.79755	1	3max	1	38	6whn; 6who; 6whq; 6wi3; 6whz; 7zzu; 7zzt; 7zzr; 7zzs; 6g3o; 8a0b; 7zzp; 5ix0; 8bpa; 7kbg; 7mot; 7mox; 7moy; 7moz; 8bpb; 7zzo; 8bpc; 7mos; 8c60; 4lxz; 6xeb; 6xdm; 7zzw; 5iwg; 6wbz; 6xec; 4ly1; 7js8; 6wbw; 7ltk; 7ltl; 7ltg; 3max	38	6whn; 6who; 6whq; 6wi3; 6whz; 7zzu; 7zzt; 7zzr; 7zzs; 6g3o; 8a0b; 7zzp; 5ix0; 8bpa; 7kbg; 7mot; 7mox; 7moy; 7moz; 8bpb; 7zzo; 8bpc; 7mos; 8c60; 4lxz; 6xeb; 6xdm; 7zzw; 5iwg; 6wbz; 6xec; 4ly1; 7js8; 6wbw; 7ltk; 7ltl; 7ltg; 3max
					n-[(1s)-1-[4-(2-fluorophenyl)-1h-imidazol-2-yl]-7,7-dihydroxy-7-(1,2-oxazol-3-yl)heptyl]-1-methylazetidine-3-carboxamide	bound	V1D	6.62615	1	6xdm	1	38	6whn; 6who; 6whq; 6wi3; 6whz; 7zzu; 7zzt; 7zzr; 7zzs; 6g3o; 8a0b; 7zzp; 5ix0; 8bpa; 7kbg; 7mot; 7mox; 7moy; 7moz; 8bpb; 7zzo; 8bpc; 7mos; 8c60; 4lxz; 6xeb; 6xdm; 7zzw; 5iwg; 6wbz; 6xec; 4ly1; 7js8; 6wbw; 7ltk; 7ltl; 7ltg; 3max	38	6whn; 6who; 6whq; 6wi3; 6whz; 7zzu; 7zzt; 7zzr; 7zzs; 6g3o; 8a0b; 7zzp; 5ix0; 8bpa; 7kbg; 7mot; 7mox; 7moy; 7moz; 8bpb; 7zzo; 8bpc; 7mos; 8c60; 4lxz; 6xeb; 6xdm; 7zzw; 5iwg; 6wbz; 6xec; 4ly1; 7js8; 6wbw; 7ltk; 7ltl; 7ltg; 3max
					n-{(1s)-1-[5-(2-methoxyquinolin-3-yl)-1h-imidazol-2-yl]pentyl}-1-methylazetidine-3-carboxamide	bound	YEM	6.24572	1	7ltk	1	38	6whn; 6who; 6whq; 6wi3; 6whz; 7zzu; 7zzt; 7zzr; 7zzs; 6g3o; 8a0b; 7zzp; 5ix0; 8bpa; 7kbg; 7mot; 7mox; 7moy; 7moz; 8bpb; 7zzo; 8bpc; 7mos; 8c60; 4lxz; 6xeb; 6xdm; 7zzw; 5iwg; 6wbz; 6xec; 4ly1; 7js8; 6wbw; 7ltk; 7ltl; 7ltg; 3max	38	6whn; 6who; 6whq; 6wi3; 6whz; 7zzu; 7zzt; 7zzr; 7zzs; 6g3o; 8a0b; 7zzp; 5ix0; 8bpa; 7kbg; 7mot; 7mox; 7moy; 7moz; 8bpb; 7zzo; 8bpc; 7mos; 8c60; 4lxz; 6xeb; 6xdm; 7zzw; 5iwg; 6wbz; 6xec; 4ly1; 7js8; 6wbw; 7ltk; 7ltl; 7ltg; 3max
					n-{(1s)-5-[(2-fluoro-6-hydroxybenzene-1-carbonyl)amino]-1-[5-(naphthalen-2-yl)-1h-imidazol-2-yl]pentyl}-1,3-thiazole-5-carboxamide	bound	WBA	6.31026	1	7kbg	1	38	6whn; 6who; 6whq; 6wi3; 6whz; 7zzu; 7zzt; 7zzr; 7zzs; 6g3o; 8a0b; 7zzp; 5ix0; 8bpa; 7kbg; 7mot; 7mox; 7moy; 7moz; 8bpb; 7zzo; 8bpc; 7mos; 8c60; 4lxz; 6xeb; 6xdm; 7zzw; 5iwg; 6wbz; 6xec; 4ly1; 7js8; 6wbw; 7ltk; 7ltl; 7ltg; 3max	38	6whn; 6who; 6whq; 6wi3; 6whz; 7zzu; 7zzt; 7zzr; 7zzs; 6g3o; 8a0b; 7zzp; 5ix0; 8bpa; 7kbg; 7mot; 7mox; 7moy; 7moz; 8bpb; 7zzo; 8bpc; 7mos; 8c60; 4lxz; 6xeb; 6xdm; 7zzw; 5iwg; 6wbz; 6xec; 4ly1; 7js8; 6wbw; 7ltk; 7ltl; 7ltg; 3max
					n-{(1s)-7,7-dihydroxy-1-[5-(2-methoxyquinolin-3-yl)-1h-imidazol-2-yl]nonyl}-1-methylazetidine-3-carboxamide	bound	TV1	6.31626	1	6wbw	1	38	6whn; 6who; 6whq; 6wi3; 6whz; 7zzu; 7zzt; 7zzr; 7zzs; 6g3o; 8a0b; 7zzp; 5ix0; 8bpa; 7kbg; 7mot; 7mox; 7moy; 7moz; 8bpb; 7zzo; 8bpc; 7mos; 8c60; 4lxz; 6xeb; 6xdm; 7zzw; 5iwg; 6wbz; 6xec; 4ly1; 7js8; 6wbw; 7ltk; 7ltl; 7ltg; 3max	38	6whn; 6who; 6whq; 6wi3; 6whz; 7zzu; 7zzt; 7zzr; 7zzs; 6g3o; 8a0b; 7zzp; 5ix0; 8bpa; 7kbg; 7mot; 7mox; 7moy; 7moz; 8bpb; 7zzo; 8bpc; 7mos; 8c60; 4lxz; 6xeb; 6xdm; 7zzw; 5iwg; 6wbz; 6xec; 4ly1; 7js8; 6wbw; 7ltk; 7ltl; 7ltg; 3max
					u2m-asn-hyp-lys-gln-dly-trp-gly peptide macrocycle	polypeptide(L)		7.71914	1	6whz	1	38	6whn; 6who; 6whq; 6wi3; 6whz; 7zzu; 7zzt; 7zzr; 7zzs; 6g3o; 8a0b; 7zzp; 5ix0; 8bpa; 7kbg; 7mot; 7mox; 7moy; 7moz; 8bpb; 7zzo; 8bpc; 7mos; 8c60; 4lxz; 6xeb; 6xdm; 7zzw; 5iwg; 6wbz; 6xec; 4ly1; 7js8; 6wbw; 7ltk; 7ltl; 7ltg; 3max	38	6whn; 6who; 6whq; 6wi3; 6whz; 7zzu; 7zzt; 7zzr; 7zzs; 6g3o; 8a0b; 7zzp; 5ix0; 8bpa; 7kbg; 7mot; 7mox; 7moy; 7moz; 8bpb; 7zzo; 8bpc; 7mos; 8c60; 4lxz; 6xeb; 6xdm; 7zzw; 5iwg; 6wbz; 6xec; 4ly1; 7js8; 6wbw; 7ltk; 7ltl; 7ltg; 3max
					sulfate ion	bound	SO4	6.1338	1	7ltl	1	38	6whn; 6who; 6whq; 6wi3; 6whz; 7zzu; 7zzt; 7zzr; 7zzs; 6g3o; 8a0b; 7zzp; 5ix0; 8bpa; 7kbg; 7mot; 7mox; 7moy; 7moz; 8bpb; 7zzo; 8bpc; 7mos; 8c60; 4lxz; 6xeb; 6xdm; 7zzw; 5iwg; 6wbz; 6xec; 4ly1; 7js8; 6wbw; 7ltk; 7ltl; 7ltg; 3max	38	6whn; 6who; 6whq; 6wi3; 6whz; 7zzu; 7zzt; 7zzr; 7zzs; 6g3o; 8a0b; 7zzp; 5ix0; 8bpa; 7kbg; 7mot; 7mox; 7moy; 7moz; 8bpb; 7zzo; 8bpc; 7mos; 8c60; 4lxz; 6xeb; 6xdm; 7zzw; 5iwg; 6wbz; 6xec; 4ly1; 7js8; 6wbw; 7ltk; 7ltl; 7ltg; 3max
			A148T	-5.213	paired amphipathic helix protein sin3b	polypeptide(L)		7.20306	3	8bpa; 8bpb; 8c60	3	38	6whn; 6who; 6whq; 6wi3; 6whz; 7zzu; 7zzt; 7zzr; 7zzs; 6g3o; 8a0b; 7zzp; 5ix0; 8bpa; 7kbg; 7mot; 7mox; 7moy; 7moz; 8bpb; 7zzo; 8bpc; 7mos; 8c60; 4lxz; 6xeb; 6xdm; 7zzw; 5iwg; 6wbz; 6xec; 4ly1; 7js8; 6wbw; 7ltk; 7ltl; 7ltg; 3max	38	6whn; 6who; 6whq; 6wi3; 6whz; 7zzu; 7zzt; 7zzr; 7zzs; 6g3o; 8a0b; 7zzp; 5ix0; 8bpa; 7kbg; 7mot; 7mox; 7moy; 7moz; 8bpb; 7zzo; 8bpc; 7mos; 8c60; 4lxz; 6xeb; 6xdm; 7zzw; 5iwg; 6wbz; 6xec; 4ly1; 7js8; 6wbw; 7ltk; 7ltl; 7ltg; 3max
					mortality factor 4-like protein 1	polypeptide(L)		6.0571	2	8bpa; 8c60	2	38	6whn; 6who; 6whq; 6wi3; 6whz; 7zzu; 7zzt; 7zzr; 7zzs; 6g3o; 8a0b; 7zzp; 5ix0; 8bpa; 7kbg; 7mot; 7mox; 7moy; 7moz; 8bpb; 7zzo; 8bpc; 7mos; 8c60; 4lxz; 6xeb; 6xdm; 7zzw; 5iwg; 6wbz; 6xec; 4ly1; 7js8; 6wbw; 7ltk; 7ltl; 7ltg; 3max	38	6whn; 6who; 6whq; 6wi3; 6whz; 7zzu; 7zzt; 7zzr; 7zzs; 6g3o; 8a0b; 7zzp; 5ix0; 8bpa; 7kbg; 7mot; 7mox; 7moy; 7moz; 8bpb; 7zzo; 8bpc; 7mos; 8c60; 4lxz; 6xeb; 6xdm; 7zzw; 5iwg; 6wbz; 6xec; 4ly1; 7js8; 6wbw; 7ltk; 7ltl; 7ltg; 3max
					(2r)-2-(5-hydroxy-2-methyl-1h-indol-3-yl)-n-{(1s)-1-[5-(2-methoxyquinolin-3-yl)-1h-imidazol-2-yl]pentyl}propanamide	bound	YEV	7.93813	1	7ltl	1	38	6whn; 6who; 6whq; 6wi3; 6whz; 7zzu; 7zzt; 7zzr; 7zzs; 6g3o; 8a0b; 7zzp; 5ix0; 8bpa; 7kbg; 7mot; 7mox; 7moy; 7moz; 8bpb; 7zzo; 8bpc; 7mos; 8c60; 4lxz; 6xeb; 6xdm; 7zzw; 5iwg; 6wbz; 6xec; 4ly1; 7js8; 6wbw; 7ltk; 7ltl; 7ltg; 3max	38	6whn; 6who; 6whq; 6wi3; 6whz; 7zzu; 7zzt; 7zzr; 7zzs; 6g3o; 8a0b; 7zzp; 5ix0; 8bpa; 7kbg; 7mot; 7mox; 7moy; 7moz; 8bpb; 7zzo; 8bpc; 7mos; 8c60; 4lxz; 6xeb; 6xdm; 7zzw; 5iwg; 6wbz; 6xec; 4ly1; 7js8; 6wbw; 7ltk; 7ltl; 7ltg; 3max
					(sha)w(dth)dn(dsn)(dme)(das)k peptide macrocycle	polypeptide(L)		7.56552	1	6wi3	1	38	6whn; 6who; 6whq; 6wi3; 6whz; 7zzu; 7zzt; 7zzr; 7zzs; 6g3o; 8a0b; 7zzp; 5ix0; 8bpa; 7kbg; 7mot; 7mox; 7moy; 7moz; 8bpb; 7zzo; 8bpc; 7mos; 8c60; 4lxz; 6xeb; 6xdm; 7zzw; 5iwg; 6wbz; 6xec; 4ly1; 7js8; 6wbw; 7ltk; 7ltl; 7ltg; 3max	38	6whn; 6who; 6whq; 6wi3; 6whz; 7zzu; 7zzt; 7zzr; 7zzs; 6g3o; 8a0b; 7zzp; 5ix0; 8bpa; 7kbg; 7mot; 7mox; 7moy; 7moz; 8bpb; 7zzo; 8bpc; 7mos; 8c60; 4lxz; 6xeb; 6xdm; 7zzw; 5iwg; 6wbz; 6xec; 4ly1; 7js8; 6wbw; 7ltk; 7ltl; 7ltg; 3max
					2-[4-[(2~{r},4~{s})-4-phenylpyrrolidin-2-yl]carbonylpiperazin-1-yl]pyridine-3-carbonitrile	bound	KKI	7.99536	1	7zzu	1	38	6whn; 6who; 6whq; 6wi3; 6whz; 7zzu; 7zzt; 7zzr; 7zzs; 6g3o; 8a0b; 7zzp; 5ix0; 8bpa; 7kbg; 7mot; 7mox; 7moy; 7moz; 8bpb; 7zzo; 8bpc; 7mos; 8c60; 4lxz; 6xeb; 6xdm; 7zzw; 5iwg; 6wbz; 6xec; 4ly1; 7js8; 6wbw; 7ltk; 7ltl; 7ltg; 3max	38	6whn; 6who; 6whq; 6wi3; 6whz; 7zzu; 7zzt; 7zzr; 7zzs; 6g3o; 8a0b; 7zzp; 5ix0; 8bpa; 7kbg; 7mot; 7mox; 7moy; 7moz; 8bpb; 7zzo; 8bpc; 7mos; 8c60; 4lxz; 6xeb; 6xdm; 7zzw; 5iwg; 6wbz; 6xec; 4ly1; 7js8; 6wbw; 7ltk; 7ltl; 7ltg; 3max
					sulfate ion	bound	SO4	4.5596	1	7ltl	1	38	6whn; 6who; 6whq; 6wi3; 6whz; 7zzu; 7zzt; 7zzr; 7zzs; 6g3o; 8a0b; 7zzp; 5ix0; 8bpa; 7kbg; 7mot; 7mox; 7moy; 7moz; 8bpb; 7zzo; 8bpc; 7mos; 8c60; 4lxz; 6xeb; 6xdm; 7zzw; 5iwg; 6wbz; 6xec; 4ly1; 7js8; 6wbw; 7ltk; 7ltl; 7ltg; 3max	38	6whn; 6who; 6whq; 6wi3; 6whz; 7zzu; 7zzt; 7zzr; 7zzs; 6g3o; 8a0b; 7zzp; 5ix0; 8bpa; 7kbg; 7mot; 7mox; 7moy; 7moz; 8bpb; 7zzo; 8bpc; 7mos; 8c60; 4lxz; 6xeb; 6xdm; 7zzw; 5iwg; 6wbz; 6xec; 4ly1; 7js8; 6wbw; 7ltk; 7ltl; 7ltg; 3max
12	ARF3	NP_001650.1	K30M	-5.72	magnesium ion	bound	MG	3.993	18	8d9u; 8d9r; 8d9v; 8d9t; 8d9s; 8d9w; 7ux3; 8d4f; 8d4c; 8d4d; 1hur; 8d4e; 8d4g; 1r8q; 1rrg; 1rrf; 8sdw; 6ii6	18	18	8d9u; 8d9r; 8d9v; 8d9t; 8d9s; 8d9w; 7ux3; 8d4f; 8d4c; 8d4d; 1hur; 8d4e; 8d4g; 1r8q; 1rrg; 1rrf; 8sdw; 6ii6	18	8d9u; 8d9r; 8d9v; 8d9t; 8d9s; 8d9w; 7ux3; 8d4f; 8d4c; 8d4d; 1hur; 8d4e; 8d4g; 1r8q; 1rrg; 1rrf; 8sdw; 6ii6
					guanosine-5'-triphosphate	bound	GTP	2.32591	13	8d9u; 8d9r; 8d9v; 8d9t; 8d9s; 8d9w; 7ux3; 8d4f; 8d4c; 8d4d; 8d4e; 8d4g; 6ii6	13	18	8d9u; 8d9r; 8d9v; 8d9t; 8d9s; 8d9w; 7ux3; 8d4f; 8d4c; 8d4d; 1hur; 8d4e; 8d4g; 1r8q; 1rrg; 1rrf; 8sdw; 6ii6	18	8d9u; 8d9r; 8d9v; 8d9t; 8d9s; 8d9w; 7ux3; 8d4f; 8d4c; 8d4d; 1hur; 8d4e; 8d4g; 1r8q; 1rrg; 1rrf; 8sdw; 6ii6
					guanosine-5'-diphosphate	bound	GDP	2.62872	3	1hur; 1rrg; 1rrf	3	18	8d9u; 8d9r; 8d9v; 8d9t; 8d9s; 8d9w; 7ux3; 8d4f; 8d4c; 8d4d; 1hur; 8d4e; 8d4g; 1r8q; 1rrg; 1rrf; 8sdw; 6ii6	18	8d9u; 8d9r; 8d9v; 8d9t; 8d9s; 8d9w; 7ux3; 8d4f; 8d4c; 8d4d; 1hur; 8d4e; 8d4g; 1r8q; 1rrg; 1rrf; 8sdw; 6ii6
					guanosine-3'-monophosphate-5'-diphosphate	bound	G3D	2.77782	2	1r8q; 8sdw	2	18	8d9u; 8d9r; 8d9v; 8d9t; 8d9s; 8d9w; 7ux3; 8d4f; 8d4c; 8d4d; 1hur; 8d4e; 8d4g; 1r8q; 1rrg; 1rrf; 8sdw; 6ii6	18	8d9u; 8d9r; 8d9v; 8d9t; 8d9s; 8d9w; 7ux3; 8d4f; 8d4c; 8d4d; 1hur; 8d4e; 8d4g; 1r8q; 1rrg; 1rrf; 8sdw; 6ii6
			R19L	-5.236	peptidase c80 domain-containing protein	polypeptide(L)		2.69265	1	6ii6	1	18	8d9u; 8d9r; 8d9v; 8d9t; 8d9s; 8d9w; 7ux3; 8d4f; 8d4c; 8d4d; 1hur; 8d4e; 8d4g; 1r8q; 1rrg; 1rrf; 8sdw; 6ii6	18	8d9u; 8d9r; 8d9v; 8d9t; 8d9s; 8d9w; 7ux3; 8d4f; 8d4c; 8d4d; 1hur; 8d4e; 8d4g; 1r8q; 1rrg; 1rrf; 8sdw; 6ii6
					cytohesin-2	polypeptide(L)		6.53083	1	1r8q	1	18	8d9u; 8d9r; 8d9v; 8d9t; 8d9s; 8d9w; 7ux3; 8d4f; 8d4c; 8d4d; 1hur; 8d4e; 8d4g; 1r8q; 1rrg; 1rrf; 8sdw; 6ii6	18	8d9u; 8d9r; 8d9v; 8d9t; 8d9s; 8d9w; 7ux3; 8d4f; 8d4c; 8d4d; 1hur; 8d4e; 8d4g; 1r8q; 1rrg; 1rrf; 8sdw; 6ii6
					1,6,7,8,9,11a,12,13,14,14a-decahydro-1,13-dihydroxy-6-methyl-4h-cyclopent[f]oxacyclotridecin-4-one	bound	AFB	5.2813	1	1r8q	1	18	8d9u; 8d9r; 8d9v; 8d9t; 8d9s; 8d9w; 7ux3; 8d4f; 8d4c; 8d4d; 1hur; 8d4e; 8d4g; 1r8q; 1rrg; 1rrf; 8sdw; 6ii6	18	8d9u; 8d9r; 8d9v; 8d9t; 8d9s; 8d9w; 7ux3; 8d4f; 8d4c; 8d4d; 1hur; 8d4e; 8d4g; 1r8q; 1rrg; 1rrf; 8sdw; 6ii6
12	RAN	NP_006316.1	G57E	-5.67	e3 sumo-protein ligase ranbp2	polypeptide(L)		2.32486	6	7mnw; 7mny; 7mnx; 5clq; 7mnz; 1rrp	6	71	1byu; 1qg4; 7mo0; 6kft; 7mnw; 6a3e; 6a3b; 6a3a; 6a38; 6a3c; 4wvf; 4hb4; 7dbg; 5dif; 4hat; 5yro; 5uwp; 6m6x; 5ytb; 7ypz; 6x2o; 6xjp; 6lq9; 6x2m; 6xjs; 7mny; 6m60; 6xjt; 5yst; 7cnd; 6xju; 4gpt; 5uwu; 5uwi; 5uwt; 5ysu; 5di9; 7mo3; 7mnx; 5clq; 7mnz; 1k5g; 5uwq; 5dha; 5uww; 1k5d; 5uws; 3gj0; 6cit; 5uwj; 6xjr; 4gmx; 6x2y; 5uwo; 6x2r; 6x2x; 6x2w; 5dh9; 6x2u; 4hb0; 6x2s; 6x2p; 5dhf; 7mo1; 3gj8; 1rrp; 4hb…	74	2n1b; 2mmg; 2mmc; 1byu; 1qg4; 7mo0; 6kft; 7mnw; 6a3e; 6a3b; 6a3a; 6a38; 6a3c; 4wvf; 4hb4; 7dbg; 5dif; 4hat; 5yro; 5uwp; 6m6x; 5ytb; 7ypz; 6x2o; 6xjp; 6lq9; 6x2m; 6xjs; 7mny; 6m60; 6xjt; 5yst; 7cnd; 6xju; 4gpt; 5uwu; 5uwi; 5uwt; 5ysu; 5di9; 7mo3; 7mnx; 5clq; 7mnz; 1k5g; 5uwq; 5dha; 5uww; 1k5d; 5uws; 3gj0; 6cit; 5uwj; 6xjr; 4gmx; 6x2y; 5uwo; 6x2r; 6x2x; 6x2w; 5dh9; 6x2u; 4hb0; 6x2s; 6x2p; 5dhf; 7mo…
[truncated: 638 more rows]
