# Supplementary material for: Deep generative modeling of the human proteome reveals over a hundred novel genes involved in rare genetic disorders
Source: Research Square preprint supplement (doi:10.21203/rs.3.rs-3740259/v1), 2024-01-03
Supplement: Supplementary file 4 [file 4286dfa080753efb386357b8.xlsx]

## Sheet: Key
column	description
category	Functional annotation term category
term	Full functional enrichment term
count	Number of genes from query list that belong to that term
%	Percent of query genes that belong to that term
p-value	Fisher's exact p-value
genes	Query genes that belong to that term
list_total	Number of query genes that have an annotation in that category
pop_hits	Number of human genes that belong to that term
pop_total	Number of human genes that have an annotation in that category
fold_enrichment	Fold enrichment of that term
shared	Significant for both popEVE novel variant thresholding discoveries and DeNovoWEST genes

## Sheet: SuppTable06
category	term	count	%	p-value	genes	list_total	pop_hits	pop_total	fold_enrichment	shared
GOTERM_MF_DIRECT	GO:0005515~protein binding	105	88.2353	2.3397e-09	EIF4A2, ATF2, ZMYND8, UBE2D3, RNF19B, PPP2R2A, IKZF1, NR3C1, DCAF5, C1GALT1C1, ALCAM, KIF5B, DDX17, MAP2K4, KDM2A, RPS8, PRKCB, CYBB, RFX3, BTK, SRSF3, YME1L1, STX1A, SF1, DHX8, ANP32A, PSMD14, DHX9, ARL1, RTF1, MACROH2A1, HSP90B1, PPP3R1, G3BP2, KCNN2, TBC1D15, ZBED4, UBE2H, UBE2I, CBX5, HSPA5, INHBA, NFKB2, SNW1, GNAL, EIF6, COPS2, UBA2, SPIRE1, LHX6, ZNF777, FBXL3, LHX5, CALM1, CALM2, ARF3, DD…	116	12657	18976	1.35708	TRUE
GOTERM_MF_DIRECT	GO:0046872~metal ion binding	32	26.8908	0.000301189	HDAC5, ATF2, PRKAA1, HDAC2, PSMD14, DHX9, ZMYND8, USP12, ARL1, RNF19B, IKZF1, ING1, GNAI2, MAT2A, ARIH2, ARIH1, ZBED4, EIF5B, EGR3, KCND2, CYBB, ZFX, VAV2, DNAJA1, COL3A1, GNAL, BTK, UBA2, LHX6, YME1L1, ZNF777, LHX5	116	2728	18976	1.9189	TRUE
GOTERM_MF_DIRECT	GO:0003723~RNA binding	29	24.3697	4.51858e-08	EIF4A2, ARF3, HDAC2, DDX46, DHX8, ANP32A, DHX9, ELAVL4, DDX42, RTF1, NR3C1, HSP90B1, RPGR, XPO1, PABPN1, G3BP2, RBBP7, SF3B1, ZBED4, DDX17, EIF5B, UBE2I, RPS8, DNAJC2, SNW1, SRSF3, ETF1, RAN, SF1	116	1483	18976	3.19892	TRUE
GOTERM_MF_DIRECT	GO:0005524~ATP binding	29	24.3697	1.01403e-07	EIF4A2, PRKAA1, DDX46, DHX8, DHX9, UBE2D3, DDX42, PIK3CD, HSP90B1, ATP5F1B, MAT2A, KIF5B, CCT8, CLASP1, MAP4K4, DDX17, MAP2K4, UBE2H, UBE2I, HSPA5, PRKCB, CSNK1A1, WARS1, DNAJA1, ACTC1, BTK, UBA2, YME1L1, ABCE1	116	1541	18976	3.07852	TRUE
GOTERM_BP_DIRECT	GO:0006357~regulation of transcription from RNA polymerase II promoter	20	16.8067	0.00753106	DDX17, ATF2, EGR3, KDM2A, PRKCB, DHX9, STAT3, RFX3, INHBA, IKZF1, NR3C1, ZFX, NFKB2, NEUROD2, SNW1, WDR5, LHX6, ZNF777, LHX5, TAF4	118	1736	19462	1.90014	TRUE
GOTERM_BP_DIRECT	GO:0045944~positive regulation of transcription from RNA polymerase II promoter	19	15.9664	0.000396163	H2AZ1, DDX17, ATF2, HDAC5, HDAC2, EGR3, DHX9, STAT3, RFX3, INHBA, NR3C1, ZFX, NFKB2, NEUROD2, PPP3CB, PPP3R1, SNW1, SF3B1, ZBED4	118	1232	19462	2.5436	TRUE
GOTERM_BP_DIRECT	GO:0000122~negative regulation of transcription from RNA polymerase II promoter	17	14.2857	0.000376568	ATF2, HDAC5, HDAC2, UBE2I, CBX5, ZMYND8, STAT3, UBE2D3, RTF1, NR3C1, ING1, MACROH2A1, SNW1, RBBP4, COPS2, WDR5, RBBP7	118	1015	19462	2.76241	TRUE
GOTERM_BP_DIRECT	GO:0006325~chromatin organization	15	12.605	8.97942e-09	H2AZ1, HDAC5, PRKAA1, HDAC2, CBX5, KDM2A, PRKCB, ZMYND8, IKZF1, NR3C1, ING1, DNAJC2, CARM1, SPIN1, WDR5	118	323	19462	7.65939	TRUE
GOTERM_BP_DIRECT	GO:0045893~positive regulation of transcription, DNA-templated	15	12.605	0.000124451	PRKAA1, HDAC2, PRKCB, STAT3, RFX3, INHBA, ING1, DNAJC2, PPP3CB, RBBP4, SPIN1, WDR5, LHX5, RBBP7, TAF4	118	730	19462	3.38902	TRUE
GOTERM_BP_DIRECT	GO:0006355~regulation of transcription, DNA-templated	15	12.605	0.00335756	ATF2, ZMYND8, STAT3, RFX3, NR3C1, ING1, ZFX, NFKB2, NEUROD2, RBBP4, CARM1, SPIN1, WDR5, ZNF777, RBBP7	118	1024	19462	2.416	TRUE
GOTERM_MF_DIRECT	GO:0016887~ATPase activity	13	10.9244	1.58762e-05	EIF4A2, DDX17, HSPA5, DDX46, DHX8, DHX9, DDX42, HSP90B1, ATP5F1B, KIF5B, YME1L1, CCT8, ABCE1	116	443	18976	4.8005	TRUE
GOTERM_MF_DIRECT	GO:0019904~protein domain specific binding	12	10.084	4.15399e-07	ARF3, PPP3R1, HSPA5, ZMYND8, ARL1, KCNN2, IKZF1, CALM1, CALM2, STX1A, RAN, WARS1	116	254	18976	7.72848	FALSE
GOTERM_BP_DIRECT	GO:0045892~negative regulation of transcription, DNA-templated	12	10.084	0.000886364	HDAC5, HDAC2, UBE2I, SNW1, CBX5, RBBP4, RFX3, ZNF777, IKZF1, RBBP7, NR3C1, SF1	118	592	19462	3.34322	TRUE
GOTERM_BP_DIRECT	GO:0006511~ubiquitin-dependent protein catabolic process	10	8.40336	6.4806e-05	UBE2H, UBE2I, PSMD14, PSMA2, USP12, UBE2D3, ARIH2, RNF19B, ARIH1, RPGR	118	290	19462	5.68732	FALSE
GOTERM_BP_DIRECT	GO:0006468~protein phosphorylation	10	8.40336	0.00147511	PRKAA1, PPP3CB, PRKCB, CSNK1A1, COPS2, BTK, PIK3CD, TAF4, CLASP1, MAP4K4	118	445	19462	3.70634	TRUE
GOTERM_BP_DIRECT	GO:0006338~chromatin remodeling	9	7.56303	0.000969721	HDAC5, PRKAA1, HDAC2, KDM2A, RBBP4, PRKCB, CARM1, RBBP7, SF3B1	118	336	19462	4.41783	TRUE
GOTERM_MF_DIRECT	GO:0046982~protein heterodimerization activity	8	6.72269	0.00856189	H2AZ1, NEUROD2, ATF2, CYBB, UBA2, TAF4, MACROH2A1, RAN	116	381	18976	3.43488	FALSE
GOTERM_BP_DIRECT	GO:0000398~mRNA splicing, via spliceosome	7	5.88235	0.00132833	SNW1, DDX46, DHX8, SRSF3, PRPF19, SF3B1, SF1	118	200	19462	5.77263	FALSE
GOTERM_BP_DIRECT	GO:0000209~protein polyubiquitination	7	5.88235	0.00154417	UBE2H, PSMA2, UBE2D3, ARIH2, RNF19B, ARIH1, PRPF19	118	206	19462	5.60449	FALSE
GOTERM_MF_DIRECT	GO:0042393~histone binding	7	5.88235	0.00190094	DNAJC2, HDAC2, RBBP4, ANP32A, PRKCB, WDR5, RBBP7	116	213	18976	5.37607	TRUE
GOTERM_BP_DIRECT	GO:0031507~heterochromatin assembly	6	5.04202	7.31159e-05	H2AZ1, HDAC5, HDAC2, RBBP4, RBBP7, MACROH2A1	118	72	19462	13.7444	FALSE
GOTERM_MF_DIRECT	GO:0003724~RNA helicase activity	6	5.04202	9.21932e-05	EIF4A2, DDX17, DDX46, DHX8, DHX9, DDX42	116	75	18976	13.0869	FALSE
GOTERM_BP_DIRECT	GO:0030182~neuron differentiation	6	5.04202	0.00413694	NEUROD2, HDAC5, HSPA5, COPS2, LHX6, LHX5	118	175	19462	5.65482	FALSE
GOTERM_MF_DIRECT	GO:0035064~methylated histone binding	5	4.20168	0.00123229	CBX5, ZMYND8, WDR5, SPIN1, ING1	116	77	18976	10.6225	FALSE
GOTERM_BP_DIRECT	GO:0006606~protein import into nucleus	5	4.20168	0.00384741	ATF2, PPP3R1, STAT3, ING1, RAN	118	106	19462	7.77982	FALSE
GOTERM_BP_DIRECT	GO:0032760~positive regulation of tumor necrosis factor production	5	4.20168	0.00411271	HDAC2, DHX9, STAT3, BTK, CYBB	118	108	19462	7.63575	FALSE
GOTERM_BP_DIRECT	GO:0030512~negative regulation of transforming growth factor beta receptor signaling pathway	5	4.20168	0.00498228	HDAC2, RBBP4, HSPA5, RBBP7, ING1	118	114	19462	7.23387	FALSE
GOTERM_MF_DIRECT	GO:0051082~unfolded protein binding	5	4.20168	0.00853643	DNAJA1, HSPA5, NACA, CCT8, HSP90B1	116	132	18976	6.19645	FALSE
GOTERM_BP_DIRECT	GO:0000054~ribosomal subunit export from nucleus	4	3.36134	4.17965e-06	XPO1, EIF6, ABCE1, RAN	118	6	19462	109.955	FALSE
GOTERM_BP_DIRECT	GO:1900242~regulation of synaptic vesicle endocytosis	4	3.36134	0.000111998	PPP3CB, SLC17A7, CALM1, CALM2	118	16	19462	41.2331	FALSE
GOTERM_BP_DIRECT	GO:1902455~negative regulation of stem cell population maintenance	4	3.36134	0.000260225	HDAC2, RBBP4, RBBP7, ING1	118	21	19462	31.4157	FALSE
GOTERM_MF_DIRECT	GO:0019787~ubiquitin-like protein transferase activity	4	3.36134	0.000946096	UBE2H, UBE2I, UBE2D3, ARIH1	116	32	18976	20.4483	FALSE
GOTERM_BP_DIRECT	GO:0032446~protein modification by small protein conjugation	4	3.36134	0.00120449	UBE2H, UBE2I, UBE2D3, UBA2	118	35	19462	18.8494	FALSE
GOTERM_BP_DIRECT	GO:0042220~response to cocaine	4	3.36134	0.00141749	HDAC5, HDAC2, HSPA5, ELAVL4	118	37	19462	17.8305	TRUE
GOTERM_BP_DIRECT	GO:0042113~B cell activation	4	3.36134	0.00153229	HDAC5, PRKCB, BTK, PIK3CD	118	38	19462	17.3613	FALSE
GOTERM_MF_DIRECT	GO:0031492~nucleosomal DNA binding	4	3.36134	0.00195441	H2AZ1, HDAC2, RBBP4, MACROH2A1	116	41	18976	15.9596	TRUE
GOTERM_BP_DIRECT	GO:1902459~positive regulation of stem cell population maintenance	4	3.36134	0.00283194	HDAC2, RBBP4, RBBP7, ING1	118	47	19462	14.0368	TRUE
GOTERM_BP_DIRECT	GO:0038095~Fc-epsilon receptor signaling pathway	4	3.36134	0.00300762	MAP2K4, PSMA2, BTK, VAV2	118	48	19462	13.7444	FALSE
GOTERM_BP_DIRECT	GO:0016575~histone deacetylation	4	3.36134	0.00398594	HDAC5, HDAC2, RBBP4, RBBP7	118	53	19462	12.4477	TRUE
GOTERM_BP_DIRECT	GO:0006413~translational initiation	4	3.36134	0.00442526	EIF4A2, EIF5B, EIF6, ABCE1	118	55	19462	11.9951	FALSE
GOTERM_MF_DIRECT	GO:1990841~promoter-specific chromatin binding	4	3.36134	0.00783799	ATF2, HDAC2, DHX9, MACROH2A1	116	67	18976	9.76634	TRUE
GOTERM_BP_DIRECT	GO:0034214~protein hexamerization	3	2.52101	0.0012549	MAT2A, YME1L1, LRRC8A	118	9	19462	54.9774	FALSE
GOTERM_MF_DIRECT	GO:0019855~calcium channel inhibitor activity	3	2.52101	0.0023095	CALM1, CALM2, STX1A	116	12	18976	40.8966	FALSE
GOTERM_BP_DIRECT	GO:0042659~regulation of cell fate specification	3	2.52101	0.00267652	HDAC2, RBBP4, RBBP7	118	13	19462	38.0613	FALSE
GOTERM_BP_DIRECT	GO:2000736~regulation of stem cell differentiation	3	2.52101	0.00634317	HDAC2, RBBP4, RBBP7	118	20	19462	24.7398	FALSE
GOTERM_BP_DIRECT	GO:0051571~positive regulation of histone H3-K4 methylation	3	2.52101	0.00982158	SNW1, WDR5, RTF1	118	25	19462	19.7919	TRUE
