# Supplementary material for: Deep generative modeling of the human proteome reveals over a hundred novel genes involved in rare genetic disorders
Source: Research Square preprint supplement (doi:10.21203/rs.3.rs-3740259/v1), 2024-01-03
Supplement: Supplementary file 5 [file 74bdc99b7a7c2b70b230d272.xlsx]

## Sheet: SuppTable05
	Average Precision	Average Spearman	Average AUC per protein
Model	SDD cases vs controls	DMS	ClinGen-curated ClinVar 2019	ClinGen-curated ClinVar 2020	ClinVar 2023
popEVE	0.9	0.51	0.94	0.94	0.94
REVEL	0.86	0.45	0.94	0.93	-
SIFT	0.79	0.39	0.88	0.88	-
FATHMM	0.82	0.25	0.77	0.81	-
VEST4	0.83	0.44	0.94	0.92	-
BayesDel	0.82	0.43	0.93	0.92	-
CADD	0.72	0.37	0.9	0.88	-
PrimateAI	0.86	0.27	0.87	0.9	-
AlphaMissense	0.88	-	-	-	-
popEVE components
Model	SDD cases vs controls	DMS	ClinGen-curated ClinVar 2019	ClinGen-curated ClinVar 2020	ClinVar 2023
pop EVE	0.88	0.5	0.93	0.93	0.93
pop ESM1v	0.88	0.53	0.89	0.93	0.91
EVE	0.81	0.51	0.93	0.92	0.93
ESM1v	0.86	0.53	0.89	0.93	0.9
