# Supplementary material for: Deep generative modeling of the human proteome reveals over a hundred novel genes involved in rare genetic disorders
Source: Research Square preprint supplement (doi:10.21203/rs.3.rs-3740259/v1), 2024-01-03
Supplement: Supplementary file 6 [file 8319e0379b7772f021dde655.xlsx]

## Sheet: Key
column	description
chrom	Chromosome
gene	Gene symbol
protein	RefSeq protein id
min_score	Minimum popEVE score seen in SDD metacohort
missense	Number of de novo missense in SDD metacohort
severe_mis	Number of popEVE severe de novo missense in SDD metacohort
mod_mis	Number of popEVE moderate de novo missense in SDD metacohort
mutants	Top 3 most pathogenic popEVE missense in SDD metacohort
mutant_scores	popEVE scores for the top 3 mutants

## Sheet: SuppTable04
chrom	gene	protein	min_score	missense	severe_mis	mod_mis	mutants	mutant_scores
5	ETF1	NP_004721.1	-7.16	3	3	0	R192C, R68L, I21M	-7.16, -6.847, -5.066
1	RBBP4	NP_005601.1	-6.8185	4	4	0	H373R, T155I, R131C, S378P	-6.819, -5.983, -5.814, -5.455
9	WDR5	NP_438172.1	-6.81	4	3	0	S62N, T208M, R196C	-6.81, -5.134, -5.056
4	UBE2D3	NP_871621.1	-6.7345	1	1	0	S105Y	-6.735
3	EIF4A2	NP_001958.2	-6.6425	2	1	1	Q60K	-6.643
15	ANP32A	NP_006296.1	-6.418	1	1	0	L80R	-6.418
7	UBE2H	NP_003335.1	-6.2305	1	1	0	D120V	-6.231
2	XPO1	NP_003391.1	-6.2095	7	4	0	T448K, S725R, V784A, A881T	-6.21, -5.185, -5.162, -5.152
X	OTUD5	NP_060072.1	-6.116	3	1	0	L352P	-6.116
1	AMIGO1	NP_065754.2	-6.1155	3	1	0	L112P	-6.115
15	COPS2	NP_001137359.1	-6.0835	1	1	0	F69C	-6.083
X	RBBP7	NP_001185648.1	-5.9665	1	1	0	N325D	-5.966
X	ZMYM3	NP_963893.1	-5.951	3	1	0	C454R	-5.951
22	DDX17	NP_001091974.1	-5.891	2	1	0	V484M	-5.891
9	SPIN1	NP_006708.2	-5.8635	1	1	0	Y170C	-5.864
14	WARS1	NP_004175.2	-5.8575	4	2	1	G163V, R162W	-5.857, -5.417
2	MAT2A	NP_005902.1	-5.8545	1	1	0	S206F	-5.854
5	KCNN2	NP_001359162.1	-5.8465	1	1	0	I637F	-5.846
20	ZMYND8	NP_001350643.1	-5.8215	6	3	0	R333G, W1082C, R333Q	-5.822, -5.639, -5.231
15	ACTC1	NP_005150.1	-5.8165	3	1	2	S340F	-5.816
7	PSMA2	NP_002778.1	-5.8	1	1	0	G125D	-5.8
17	MAP2K4	NP_001268364.1	-5.797	2	1	0	S262N	-5.797
22	ZBED4	NP_055653.2	-5.789	2	1	0	C136R	-5.789
10	NFKB2	NP_001309863.1	-5.7695	3	2	0	W270R, V190G	-5.77, -5.585
14	CALM1	NP_001350599.1	-5.769	2	2	0	D24Y, T31P	-5.769, -5.471
8	EGR3	NP_004421.2	-5.769	5	4	0	H319R, E347K, E347Q, E291K	-5.769, -5.749, -5.595, -5.587
2	EIF5B	NP_056988.3	-5.7585	3	1	0	H639L	-5.758
14	DCAF5	NP_003852.1	-5.747	1	1	0	C349R	-5.747
X	BTK	NP_000052.1	-5.731	4	2	1	V427M, L358F	-5.731, -5.196
6	HDAC2	NP_001518.3	-5.726	5	4	0	M31R, K144T, C101Y, A148T	-5.726, -5.579, -5.49, -5.213
12	ARF3	NP_001650.1	-5.7195	2	2	0	K30M, R19L	-5.72, -5.236
12	RAN	NP_006316.1	-5.6705	1	1	0	G57E	-5.67
17	NEUROD2	NP_006151.3	-5.66	1	1	0	E130Q	-5.66
11	SF1	NP_001171501.1	-5.617	4	2	1	H329R, R303W	-5.617, -5.304
12	CBX5	NP_036249.1	-5.6075	4	2	1	W142C, C59F	-5.607, -5.095
X	RPGR	NP_001030025.1	-5.6065	1	1	0	G112A	-5.607
1	DHX9	NP_001348.2	-5.599	3	2	0	G411E, G416R	-5.599, -5.573
9	LHX6	NP_055183.2	-5.5905	1	1	0	C185S	-5.591
15	ARIH1	NP_005735.2	-5.566	4	1	2	R530I	-5.566
2	SF3B1	NP_036565.2	-5.553	5	3	2	R568H, Y570C, R594Q	-5.553, -5.536, -5.347
14	PABPN1	NP_004634.1	-5.552	2	1	0	Y217C	-5.552
9	RFX3	NP_602304.1	-5.5465	5	2	1	L241W, D611Y	-5.546, -5.361
9	HSPA5	NP_005338.1	-5.546	1	1	0	T229I	-5.546
21	CCT8	NP_006576.2	-5.5445	1	1	0	A82D	-5.544
2	COL3A1	NP_000081.2	-5.5355	7	4	1	G369E, G414V, G786R, G1071V	-5.535, -5.245, -5.152, -5.125
5	MACROH2A1	NP_613258.2	-5.5275	1	1	0	D88H	-5.527
7	STX1A	NP_004594.1	-5.52	2	1	0	Q226R	-5.52
2	MAP4K4	NP_663719.2	-5.5165	7	4	1	G173D, H237D, R152W	-5.516, -5.474, -5.423
11	PRPF19	NP_055317.1	-5.514	3	2	0	G404S, R119H	-5.514, -5.457
5	PRKAA1	NP_996790.3	-5.471	1	1	0	S202L	-5.471
4	ABCE1	NP_002931.2	-5.468	1	1	0	E487D	-5.468
13	USP12	NP_872294.2	-5.4655	1	1	0	N51T	-5.466
3	ARIH2	NP_001304263.1	-5.445	1	1	0	C158R	-5.445
X	CYBB	NP_000388.2	-5.4385	2	1	0	P339R	-5.438
16	UBE2I	NP_003336.1	-5.4025	2	1	1	P128L	-5.402
1	PRG4	NP_005798.3	-5.402	4	2	0	A1246E, C50G	-5.402, -5.231
1	RPS8	NP_001003.1	-5.4	1	1	0	G50E	-5.4
7	VSTM2A	NP_872352.2	-5.391	1	1	0	Y125C	-5.391
2	PSMD14	NP_005796.1	-5.3835	2	2	0	M54V, K209I	-5.383, -5.071
3	GNAI2	NP_002061.1	-5.376	3	2	0	R179C, K46T	-5.376, -5.203
10	KIF5B	NP_004512.1	-5.3745	3	2	0	S257L, E22K	-5.374, -5.335
4	G3BP2	NP_987101.1	-5.3715	5	1	0	K408E	-5.372
7	ZNF777	NP_056509.2	-5.37	1	1	0	L241W	-5.37
X	ZFX	NP_001317256.1	-5.3655	2	2	0	R803W, N629K	-5.365, -5.158
4	H2AZ1	NP_002097.1	-5.3615	1	1	0	R81H	-5.361
2	CLASP1	NP_056097.1	-5.361	6	1	0	R381W	-5.361
10	PPP3CB	NP_001135825.1	-5.36	1	1	0	D243N	-5.36
7	IKZF1	NP_006051.1	-5.3525	1	1	0	C495S	-5.353
X	C1GALT1C1	NP_001011551.1	-5.3415	1	1	0	L197R	-5.341
7	KCND2	NP_036413.1	-5.3345	1	1	0	G374S	-5.335
7	INHBA	NP_002183.1	-5.331	3	1	0	C350W	-5.331
11	KDM2A	NP_036440.1	-5.3275	2	1	0	P235L	-5.328
6	NRN1	NP_057672.1	-5.327	1	1	0	C41R	-5.327
14	SNW1	NP_036377.1	-5.3255	2	2	0	R267C, R305C	-5.325, -5.211
7	CAPZA2	NP_006127.1	-5.307	1	1	0	R259L	-5.307
18	SPIRE1	NP_001122098.1	-5.3035	2	1	0	C702Y	-5.303
2	ATF2	NP_001243019.1	-5.2995	5	2	2	R373S, N362K, R355T	-5.3, -5.295, -5.116
20	TAF4	NP_003176.2	-5.299	1	1	0	R973W	-5.299
7	DNAJC2	NP_055192.1	-5.2975	1	1	0	P120A	-5.297
12	TBC1D15	NP_073608.4	-5.2935	1	1	0	T418R	-5.293
12	ARL1	NP_001168.1	-5.282	1	1	0	K127T	-5.282
2	CALM2	NP_001292555.1	-5.273	1	1	0	D96G	-5.273
12	LHX5	NP_071758.1	-5.2565	1	1	0	K239E	-5.256
16	PRKCB	NP_997700.1	-5.249	4	1	0	E390D	-5.249
2	PPP3R1	NP_000936.1	-5.2465	1	1	0	R22T	-5.246
19	CARM1	NP_954592.1	-5.2425	1	1	0	E243G	-5.242
17	DDX42	NP_031398.2	-5.2405	3	1	0	G530E	-5.24
1	RNF19B	NP_699172.2	-5.234	1	1	0	F314S	-5.234
19	SLC17A7	NP_064705.1	-5.2335	2	1	0	G184E	-5.234
10	YME1L1	NP_647473.1	-5.225	1	1	0	E407K	-5.225
19	UBA2	NP_005490.1	-5.2245	2	1	1	N56T	-5.224
5	DDX46	NP_001287789.1	-5.2065	4	1	0	V500L	-5.207
X	SLITRK4	NP_001171678.1	-5.2055	2	1	0	C535F	-5.205
13	FBXL3	NP_036290.1	-5.202	1	1	0	R56W	-5.202
17	STAT3	NP_644805.1	-5.2015	5	1	1	E415K	-5.201
20	EIF6	NP_001254739.1	-5.197	1	1	0	V179D	-5.197
1	PIK3CD	NP_005017.3	-5.197	5	1	0	L855R	-5.197
1	SWT1	NP_001098988.1	-5.1835	1	1	0	G478V	-5.184
17	HDAC5	NP_001015053.1	-5.182	4	1	1	E261K	-5.182
13	TRPC4	NP_057263.1	-5.1805	4	1	0	G577W	-5.181
5	CSNK1A1	NP_001258671.1	-5.175	1	1	0	A124P	-5.175
6	SRSF3	NP_003008.1	-5.172	1	1	0	D61G	-5.172
8	PPP2R2A	NP_001171062.1	-5.1475	2	1	0	F222S	-5.147
12	HSP90B1	NP_003290.1	-5.1465	3	1	1	G198S	-5.146
17	DHX8	NP_004932.1	-5.143	2	1	0	T844I	-5.143
8	GFUS	NP_001304712.1	-5.135	2	1	0	N96K	-5.135
15	RTF1	NP_055953.3	-5.13	2	1	1	R211H	-5.13
9	VAV2	NP_001127870.1	-5.117	1	1	0	P643R	-5.117
13	ING1	NP_937861.1	-5.1135	2	1	0	G156D	-5.114
11	MPPED2	NP_001575.1	-5.102	2	1	0	V243D	-5.102
11	DSCAML1	NP_065744.3	-5.1	7	1	0	G51D	-5.1
1	ELAVL4	NP_001138247.2	-5.099	1	1	0	F216I	-5.099
12	ATP5F1B	NP_001677.2	-5.09	3	1	1	H378R	-5.09
9	DNAJA1	NP_001530.1	-5.089	2	1	0	D57Y	-5.089
5	NR3C1	NP_001018087.1	-5.085	2	1	0	C421R	-5.085
18	GNAL	NP_001135811.1	-5.08	1	1	0	V354M	-5.08
9	LRRC8A	NP_001120717.1	-5.069	1	1	0	L756P	-5.069
12	NACA	NP_001352825.1	-5.0685	5	1	1	I2069F	-5.069
3	ALCAM	NP_001618.2	-5.0675	1	1	0	L205P	-5.067
