# Supplementary material for: Deep generative modeling of the human proteome reveals over a hundred novel genes involved in rare genetic disorders
Source: Research Square preprint supplement (doi:10.21203/rs.3.rs-3740259/v1), 2024-01-03
Supplement: Supplementary file 7 [file 89a4f62089baf9e02113255a.xlsx]

## Sheet: Key
column	description
category	Functional annotation term category
term	Full functional enrichment term
count	Number of genes from query list that belong to that term
%	Percent of query genes that belong to that term
p-value	Fisher's exact p-value
genes	Query genes that belong to that term
list_total	Number of query genes that have an annotation in that category
pop_hits	Number of human genes that belong to that term
pop_total	Number of human genes that have an annotation in that category
fold_enrichment	Fold enrichment of that term
shared	Significant for both popEVE novel variant thresholding discoveries and DeNovoWEST genes

## Sheet: SuppTable07
category	term	count	%	p-value	genes	list_total	pop_hits	pop_total	fold_enrichment	shared
GOTERM_MF_DIRECT	GO:0003677~DNA binding	85	30.3571	1.35163e-31	KDM5B, KDM5C, SMARCB1, DDX3X, MYT1L, CHD8, ZNF292, CHD7, HNRNPU, TCF20, CHD4, CHD3, CHD2, PHF6, ARHGAP35, YY1, MECP2, SIN3A, POGZ, UBTF, EP300, H3-3A, SOX5, UPF1, MEF2C, ATRX, TFE3, DNMT3A, SOX11, EBF3, SMC1A, ARID1A, SOX10, ARID1B, FOXP2, ZEB2, MYCN, SETBP1, KAT6B, KAT6A, ADNP, AHDC1, HDAC4, KMT2D, SET, NFIX, KMT2A, SRCAP, SATB1, KMT2C, SATB2, FOXG1, KMT2B, PIK3R1, GATA3, PHF21A, PUF60, DEAF1, N…	278	1347	18976	4.30736	FALSE
GOTERM_BP_DIRECT	GO:0045944~positive regulation of transcription from RNA polymerase II promoter	74	26.4286	2.22379e-26	SMARCB1, DDX3X, CHD8, ZNF292, CHD7, HNRNPU, TCF20, UBE3A, IRF2BPL, YY1, MECP2, MED12, RPS6KA3, SIN3A, POGZ, DPF2, EP300, HRAS, KDM6B, MEF2C, ATRX, TFE3, CASK, SOX11, SOX10, POU3F3, ZEB2, MYCN, KAT6B, TBL1XR1, KAT6A, PHIP, HDAC4, KMT2D, NFIX, NOTCH1, KMT2A, KMT2C, SATB2, PIK3R2, PIK3R1, GATA3, HDAC8, ABL1, CAMTA1, ZNF148, ZBTB18, TCF7L2, CREBBP, SMAD4, BCL11B, AUTS2, BCL11A, NR2F1, SMARCA2, MEIS2,…	279	1232	19462	4.18991	TRUE
GOTERM_BP_DIRECT	GO:0006338~chromatin remodeling	41	14.6429	2.66362e-25	RERE, HDAC4, KDM5B, SETD5, KDM5C, SMARCB1, SRCAP, SATB1, KMT2C, CHD8, SATB2, CHD7, KMT2B, CHD4, GATA3, CHD3, HDAC8, YY1, NSD1, NSD2, DPF2, KMT5B, MORC2, MAP3K7, KDM6A, KDM6B, CREBBP, BRPF1, SETD1A, ATRX, DYRK1A, HUWE1, ARID1A, SMARCA2, ARID1B, GATAD2B, SMARCA4, SETBP1, WAC, BCOR, TAF1	279	336	19462	8.51193	TRUE
GOTERM_BP_DIRECT	GO:0045893~positive regulation of transcription, DNA-templated	54	19.2857	5.37891e-23	RERE, TRRAP, CHD8, CHD4, CTCF, CHD3, YY1, MED12, EP300, MAP2K1, MEF2C, TFE3, DYRK1A, MSL2, SOX11, EBF3, ARID1A, SOX10, ARID1B, POU3F3, MYCN, KAT6B, TBL1XR1, KAT6A, WAC, PHIP, HDAC4, KMT2E, NFIX, NOTCH1, KMT2A, SRCAP, KMT2B, GATA3, RAI1, DEAF1, NSD1, CREBBP, SMAD4, BRPF1, PTCH1, SMARCA2, GATAD2B, SMARCA4, KLF7, PSMC5, KANSL1, NFIA, HNRNPD, CTNNB1, TCF4, QRICH1, NAA15, OGT	279	730	19462	5.16005	TRUE
GOTERM_BP_DIRECT	GO:0006325~chromatin organization	38	13.5714	7.30577e-23	HDAC4, KMT2E, KDM5B, KMT2D, SETD5, SETD2, KDM5C, KMT2A, SATB1, TRRAP, KMT2C, CHD8, CHD7, KMT2B, EHMT1, HNRNPU, CHD4, CHD3, CHD2, HDAC8, PHF21A, NSD1, NSD2, TLK2, DPF2, EP300, KMT5B, BRPF1, SETD1A, ATRX, SMARCA4, ASXL1, KANSL1, TBL1XR1, WAC, BCOR, ZMYND11, OGT	279	323	19462	8.20662	TRUE
GOTERM_BP_DIRECT	GO:0000122~negative regulation of transcription from RNA polymerase II promoter	62	22.1429	3.20268e-22	KDM5C, MYT1L, CHD8, ZBTB20, EHMT1, HNRNPU, CHD4, CTCF, CHD3, PHF6, IRF2BPL, YY1, MECP2, SIN3A, DPF2, EP300, MEF2C, DNMT3A, SOX11, SOX10, FOXP2, FOXP1, ZEB2, TBL1XR1, ERF, HDAC4, NFIX, NOTCH1, SATB1, SATB2, FOXG1, GATA3, HDAC8, PHF21A, PURA, DEAF1, NSD1, NACC1, NSD2, ZNF148, SPEN, ZBTB18, TCF7L2, CREBBP, SMAD4, USP9X, BCL11A, PTCH1, NR2F1, SMARCA2, MEIS2, GATAD2B, SMARCA4, NR4A2, SKI, KLF7, H1-4, …	279	1015	19462	4.26097	TRUE
GOTERM_MF_DIRECT	GO:0003682~chromatin binding	39	13.9286	6.25084e-17	RERE, SET, KMT2A, CHD8, SATB2, CHD7, HNRNPU, CHD4, CHD3, CHD2, PHF21A, YY1, MECP2, MED12, SIN3A, NSD1, NSD2, UBTF, EP300, KMT5B, MORC2, UPF1, MBD5, CREBBP, SMAD4, AUTS2, ATRX, DNMT3A, SMC1A, SMARCA2, ASXL1, STAG2, NFIA, ASXL3, CSNK2B, HNRNPD, WAC, CTNNB1, ADNP	278	502	18976	5.30299	FALSE
GOTERM_MF_DIRECT	GO:0005515~protein binding	242	86.4286	5.40309e-15	TRIO, SMARCB1, TRRAP, HNRNPU, EHMT1, RPS6KA3, SYNGAP1, PPP2R1A, DPF2, SOX5, SRRM2, MEF2C, CSNK2A1, COG4, SOX10, PRKAR1B, HECW2, KCNQ2, CSNK2B, KCNQ3, SET, SRCAP, STXBP1, FOXG1, PIK3R2, GATA3, PIK3R1, GRIN2A, SPAST, ZNF148, ATP6V0A1, CREBBP, BCL11B, SETD1A, NR2F1, BRAF, GRIN2B, SMARCA2, PBX1, SMARCA4, H1-4, HNRNPK, STAG2, AGO1, HNRNPD, CDK13, ARF1, SETD2, CLTC, TCF20, KIF11, CTCF, SLC6A1, WDR45, P…	278	12657	18976	1.3051	TRUE
GOTERM_BP_DIRECT	GO:0045892~negative regulation of transcription, DNA-templated	39	13.9286	8.00108e-15	RERE, HDAC4, KDM5B, KDM5C, SET, NOTCH1, CHD8, FOXG1, EHMT1, CHD4, GATA3, CHD3, CTCF, MECP2, PURA, SIN3A, DEAF1, NACC1, DPF2, ZNF148, SPEN, ZBTB18, TCF7L2, SMAD4, DNMT3A, SMARCA2, SOX10, POU3F3, FOXP2, GATAD2B, SMARCA4, FOXP1, PSMC5, HNRNPK, KAT6B, KAT6A, CTNNB1, BCOR, ZMYND11	279	592	19462	4.59543	TRUE
GOTERM_BP_DIRECT	GO:0006357~regulation of transcription from RNA polymerase II promoter	66	23.5714	3.03269e-13	SMARCB1, MYT1L, TRRAP, ZNF292, ZBTB20, TCF20, CTCF, CHD2, PHF6, IRF2BPL, YY1, MED12, DPF2, HRAS, SOX5, MEF2C, TFE3, DYRK1A, EBF3, ARID1A, SOX10, ARID1B, FOXP2, POU3F3, FOXP1, ZEB2, MYCN, TBL1XR1, ERF, PHIP, ADNP, NFIX, NOTCH1, SRCAP, SATB1, SATB2, FOXG1, PURA, RAI1, DEAF1, NACC1, CAMTA1, HIVEP2, ZNF148, SPEN, ZBTB18, TCF7L2, SMAD4, BRPF1, BCL11B, BCL11A, NR2F1, ZFHX4, SMARCA2, MEIS2, PBX1, SMARCA…	279	1736	19462	2.65202	TRUE
GOTERM_BP_DIRECT	GO:0007399~nervous system development	29	10.3571	1.91125e-11	HDAC4, CAMK2B, SMARCB1, MYT1L, ZC4H2, NEXMIF, PTEN, IRF2BPL, PURA, DPF2, EP300, CAMK2G, MBD5, MEF2C, DYRK1A, NR2F1, SOX11, PPP2R5D, ARID1A, SMARCA2, ARID1B, SMARCA4, ZEB2, DLG4, SCN8A, KCNQ2, TCF4, SCN2A, FGF12	279	425	19462	4.75984	FALSE
GOTERM_MF_DIRECT	GO:0042393~histone binding	20	7.14286	3.53996e-10	HDAC4, KDM5B, KMT2D, SET, BRPF1, SRCAP, KMT2C, CHD8, ATRX, CHD7, CHD4, CHD3, CHD2, SMARCA2, PHF6, SMARCA4, KAT6B, TBL1XR1, KAT6A, DPF2	278	213	18976	6.4093	TRUE
GOTERM_MF_DIRECT	GO:0003713~transcription coactivator activity	22	7.85714	4.21519e-10	KMT2E, RERE, KMT2D, CREBBP, SMARCB1, NOTCH1, SRCAP, KMT2C, DYRK1A, UBE3A, ARID1A, SMARCA2, ARID1B, SMARCA4, ASXL1, MED12, KAT6B, SIN3A, KAT6A, ABL1, EP300, CTNNB1	278	267	18976	5.62434	FALSE
GOTERM_MF_DIRECT	GO:0003714~transcription corepressor activity	19	6.78571	1.24008e-09	SPEN, RERE, HDAC4, SETD5, KDM5B, CREBBP, DNMT3A, HNRNPU, CHD4, SMARCA4, IRF2BPL, MECP2, TBL1XR1, SIN3A, DEAF1, NSD1, DPF2, BCOR, ZMYND11	278	204	18976	6.35746	FALSE
GOTERM_BP_DIRECT	GO:0048511~rhythmic process	13	4.64286	1.44659e-09	KDM5B, USP7, CREBBP, KDM5C, CSNK2A1, USP9X, FBXW7, UBE3A, MTOR, SIN3A, EP300, DNM1L, OGT	279	80	19462	11.3354	FALSE
GOTERM_MF_DIRECT	GO:0061629~RNA polymerase II sequence-specific DNA binding transcription factor binding	18	6.42857	2.28998e-09	SPEN, HDAC4, TCF7L2, CREBBP, MEF2C, KDM5C, SMAD4, SETD1A, DNMT3A, CHD4, GATA3, KAT6B, SIN3A, KAT6A, CSNK2B, EP300, CTNNB1, TAF1	278	187	18976	6.57038	FALSE
GOTERM_BP_DIRECT	GO:0007268~chemical synaptic transmission	20	7.14286	5.77823e-09	GABRB3, GABRB2, GRIA2, SNAP25, GABRA1, SYT1, CACNA1A, SLC6A1, CACNA1E, GRIN2B, CACNA1G, GRIN1, RPS6KA3, GRIN2A, DLG4, KCNQ2, KCNQ3, CTNNB1, FGF12, KCNK3	279	257	19462	5.4285	FALSE
GOTERM_BP_DIRECT	GO:0006355~regulation of transcription, DNA-templated	41	14.6429	7.07064e-09	RERE, KMT2E, KDM5B, KMT2D, SETD5, SETD2, KDM5C, NOTCH1, SRCAP, MYT1L, TRRAP, KMT2C, CHD7, KMT2B, CHD3, AFF3, PPP2CA, PPP2R1A, NSD1, NSD2, ABL1, CREBBP, MEF2C, SMAD4, BRPF1, ATRX, SOX11, SMARCA2, MEIS2, SMARCA4, ASXL1, MN1, ZEB2, NFIA, SETBP1, KAT6B, ASXL3, KAT6A, CNOT3, HNRNPD, AHDC1	279	1024	19462	2.79298	TRUE
GOTERM_MF_DIRECT	GO:0000978~RNA polymerase II core promoter proximal region sequence-specific DNA binding	46	16.4286	8.3676e-09	HDAC4, NFIX, MYT1L, SATB1, SATB2, CHD7, ZBTB20, HNRNPU, GATA3, CTCF, CHD2, YY1, MED12, NSD1, NACC1, HIVEP2, ZNF148, H3-3A, SOX5, KDM6A, KDM6B, ZBTB18, TCF7L2, MEF2C, SMAD4, BCL11B, BCL11A, TFE3, DNMT3A, NR2F1, SOX11, EBF3, SOX10, ZFHX4, MEIS2, POU3F3, PBX1, FOXP2, FOXP1, NR4A2, SKI, KLF7, ZEB2, MYCN, NFIA, TCF4	278	1222	18976	2.56949	FALSE
GOTERM_MF_DIRECT	GO:0016301~kinase activity	19	6.78571	1.85029e-08	CDKL5, CSNK2A1, TRRAP, KIDINS220, DYRK1A, CASK, PIK3R2, PIK3R1, MTOR, CNKSR2, RPS6KA3, PRKAR1B, PIK3CA, TAOK1, CSNK2B, ABL1, TAB2, CERT1, TAF1	278	242	18976	5.35918	FALSE
GOTERM_MF_DIRECT	GO:0000976~transcription regulatory region sequence-specific DNA binding	18	6.42857	8.89083e-08	HDAC4, KMT2D, TCF7L2, MEF2C, SMAD4, TFE3, ZBTB20, SOX11, GATA3, CTCF, CHD3, SMARCA2, SOX10, PBX1, YY1, TBL1XR1, BCOR, SOX5	278	239	18976	5.14084	FALSE
GOTERM_MF_DIRECT	GO:0008013~beta-catenin binding	12	4.28571	9.93094e-08	MED12, NR4A2, AMER1, KDM6B, TCF7L2, TBL1XR1, CHD8, SETD1A, EP300, CTNNB1, TCF4, ADNP	278	92	18976	8.90335	FALSE
GOTERM_MF_DIRECT	GO:0005524~ATP binding	50	17.8571	1.69952e-07	TRIO, DDX3X, CHD8, MAST1, CHD7, HNRNPU, CHD4, CHD3, KIF11, CHD2, HK1, RPS6KA3, KIF5C, TLK2, KIF1A, MAP3K7, UPF1, MAP2K1, CDKL5, CSNK2A1, ATRX, DYRK1A, CASK, SMC1A, PIK3CA, SCN8A, ATP6V1A, CAMK2B, SRCAP, DDX23, ATP1A3, ADCY5, SPAST, ABL1, CAMK2G, MORC2, DYNC1H1, BRAF, SMARCA2, MTOR, SMARCA4, CDK8, PSMC5, CLCN4, TAOK1, KRAS, CDK13, FGFR3, FGFR2, TAF1	278	1541	18976	2.21476	TRUE
GOTERM_BP_DIRECT	GO:0034765~regulation of ion transmembrane transport	13	4.64286	7.58069e-07	KCNB1, KCND3, KCNA2, CACNA1A, CACNA1C, CACNA1E, CACNA1G, SCN8A, KCNQ2, KCNQ3, SCN2A, KCNH1, SCN1A	279	139	19462	6.52397	FALSE
GOTERM_MF_DIRECT	GO:0008331~high voltage-gated calcium channel activity	7	2.5	9.89045e-07	SCN8A, CACNA1A, CACNA1C, SCN2A, CACNA1E, CACNA1G, SCN1A	278	24	18976	19.9089	FALSE
GOTERM_BP_DIRECT	GO:0051963~regulation of synapse assembly	6	2.14286	1.53231e-06	SNAP25, SETD5, MEF2C, CTNNB1, CHD4, OGT	279	15	19462	27.9025	FALSE
GOTERM_MF_DIRECT	GO:0016407~acetyltransferase activity	6	2.14286	2.44787e-06	CREBBP, NAA10, KAT6B, KAT6A, EP300, NAA15	278	16	18976	25.5971	FALSE
GOTERM_MF_DIRECT	GO:0042800~histone methyltransferase activity (H3-K4 specific)	6	2.14286	3.42652e-06	KMT2D, SETBP1, KMT2A, KMT2C, SETD1A, KMT2B	278	17	18976	24.0914	FALSE
GOTERM_MF_DIRECT	GO:0043565~sequence-specific DNA binding	19	6.78571	3.62406e-06	ZBTB18, RERE, TCF7L2, SMAD4, SATB1, NR2F1, CTCF, MEIS2, FOXP2, POU3F3, GATAD2B, FOXP1, NR4A2, ZEB2, NSD2, ERF, CAMTA1, ZNF148, TAF1	278	346	18976	3.74833	FALSE
GOTERM_BP_DIRECT	GO:0010629~negative regulation of gene expression	18	6.42857	3.68897e-06	MEF2C, NOTCH1, FBXW7, ZBTB20, SOX11, CHD4, CTCF, FOXP1, YY1, MECP2, MYCN, PIK3CA, CTNNB1, ADNP, ZNF148, HRAS, MAP3K7, TAF1	279	319	19462	3.93609	FALSE
GOTERM_BP_DIRECT	GO:0007507~heart development	15	5.35714	3.79846e-06	KDM6B, MAP2K1, MEF2C, NOTCH1, PTEN, PTPN11, CACNA1C, MECP2, MED12, EP300, TAB2, BCOR, FGF12, KDM6A, FBN1	279	221	19462	4.73459	FALSE
GOTERM_MF_DIRECT	GO:0031490~chromatin DNA binding	10	3.57143	4.12936e-06	MECP2, KDM6B, H1-4, CREBBP, NOTCH1, ATRX, EP300, HNRNPU, OGT, KDM6A	278	85	18976	8.03047	FALSE
GOTERM_MF_DIRECT	GO:0003700~transcription factor activity, sequence-specific DNA binding	26	9.28571	4.55745e-06	NFIX, GATA3, CTCF, AFF3, MECP2, ZNF148, SOX5, TCF7L2, MEF2C, SMAD4, BCL11B, BCL11A, TFE3, NR2F1, SOX11, EBF3, SOX10, POU3F3, PBX1, FOXP2, FOXP1, KLF7, MYCN, NFIA, TCF4, AHDC1	278	618	18976	2.87174	FALSE
GOTERM_BP_DIRECT	GO:0097692~histone H3-K4 monomethylation	5	1.78571	4.85223e-06	KMT2D, KMT2A, KMT2C, SETD1A, KMT2B	279	9	19462	38.7535	FALSE
GOTERM_BP_DIRECT	GO:0048538~thymus development	8	2.85714	5.02089e-06	ASXL1, MAP2K1, BCL11B, ABL1, CTNNB1, BRAF, GATA3, PBX1	279	48	19462	11.626	FALSE
GOTERM_BP_DIRECT	GO:0006306~DNA methylation	7	2.5	5.33762e-06	KMT2E, KMT2A, ATRX, DNMT3A, EHMT1, CTCF, PPM1D	279	32	19462	15.2592	FALSE
GOTERM_BP_DIRECT	GO:0007420~brain development	16	5.71429	6.47464e-06	SYT1, CHD8, FOXG1, PTCH1, MAST1, SETD1A, UBE3A, PTPN11, PCDH19, MEIS2, GRIN2B, PBX1, GRIN1, GRIN2A, COL4A1, KCNK3	279	264	19462	4.22765	FALSE
GOTERM_BP_DIRECT	GO:0008542~visual learning	8	2.85714	6.64734e-06	MECP2, GRIN2A, SYNGAP1, KMT2A, BRAF, KRAS, MEIS2, GRIN1	279	50	19462	11.161	FALSE
GOTERM_MF_DIRECT	GO:0008270~zinc ion binding	32	11.4286	6.68339e-06	RERE, HDAC4, KDM5B, KDM5C, KMT2A, MYT1L, KMT2B, EHMT1, CHD4, GATA3, CHD3, CTCF, GRIN2A, NSD1, EP300, MORC2, UPF1, CREBBP, NR2F1, FBXO11, GRIN2B, ZFHX4, GATAD2B, MIB1, NR4A2, SKI, TRAF7, KLF7, KAT6A, TAB2, TRIP12, ZMYND11	278	889	18976	2.45702	FALSE
GOTERM_MF_DIRECT	GO:0097110~scaffold protein binding	9	3.21429	7.21031e-06	DSP, MAP2K1, DLG4, UBTF, BRAF, MAP3K7, PHF6, CACNA1G, ADCY5	278	69	18976	8.90335	FALSE
GOTERM_MF_DIRECT	GO:0003924~GTPase activity	19	6.78571	7.56363e-06	ARF1, DDX3X, GNAI1, ARHGAP35, DNM1, RHOBTB2, GNAO1, EFTUD2, RIT1, RAB14, GNB2, EEF1A2, GNB1, GNAS, MFN2, KRAS, RAC1, DNM1L, HRAS	278	365	18976	3.55321	FALSE
GOTERM_MF_DIRECT	GO:0004674~protein serine/threonine kinase activity	20	7.14286	8.02167e-06	CAMK2B, MAP2K1, TRIO, CDKL5, CSNK2A1, MAST1, DYRK1A, CASK, BRAF, PPM1D, MTOR, CDK8, RPS6KA3, PIK3CA, TAOK1, CSNK2B, TLK2, CDK13, MAP3K7, TAF1	278	403	18976	3.38754	FALSE
GOTERM_MF_DIRECT	GO:0003712~transcription cofactor activity	12	4.28571	8.27647e-06	MED12, CREBBP, SMARCB1, KAT6B, BCL11A, TRRAP, NSD1, KAT6A, DPF2, EP300, CAMTA1, MED13L	278	143	18976	5.72803	FALSE
GOTERM_BP_DIRECT	GO:0009791~post-embryonic development	9	3.21429	8.50458e-06	NR4A2, MECP2, KDM5B, KMT2A, ABL1, ITPR1, GATA3, FGFR2, MTOR	279	72	19462	8.71953	FALSE
GOTERM_MF_DIRECT	GO:0016887~ATPase activity	21	7.5	8.76909e-06	ATP6V1A, DYNC1H1, UPF1, DDX3X, SRCAP, CHD8, ATRX, DDX23, CHD7, ATP1A3, CHD4, CHD3, CHD2, SMC1A, SMARCA2, SMARCA4, PSMC5, SPAST, KIF5C, KIF1A, MORC2	278	443	18976	3.23575	TRUE
GOTERM_MF_DIRECT	GO:0046872~metal ion binding	68	24.2857	8.84564e-06	RERE, KDM5B, SETD2, KDM5C, ZNF292, ZBTB20, TCF20, UBE3A, CHD4, CHD3, SLC6A1, PHF6, IRF2BPL, YY1, PPP1CB, POGZ, DPF2, CHAMP1, EP300, KMT5B, KDM6A, KDM6B, KCND3, ATRX, DNMT3A, MSL2, EBF3, FOXP2, DHDDS, FOXP1, ZEB2, COL2A1, KAT6B, KAT6A, CSNK2B, ZMYND11, HDAC4, KMT2E, KMT2D, KMT2C, ZC4H2, CACNA1A, ATP1A3, CACNA1C, PPM1D, HDAC8, CACNA1E, PHF21A, ADCY5, PPP2CA, RAI1, DEAF1, NSD1, NSD2, HIVEP2, ZNF148,…	278	2728	18976	1.70147	TRUE
GOTERM_MF_DIRECT	GO:0004712~protein serine/threonine/tyrosine kinase activity	21	7.5	9.45813e-06	CAMK2B, MAP2K1, TRIO, CDKL5, CSNK2A1, MAST1, DYRK1A, CASK, MTOR, CDK8, RPS6KA3, PIK3CA, TAOK1, TLK2, ABL1, CDK13, MAP3K7, CAMK2G, FGFR3, FGFR2, TAF1	278	445	18976	3.22121	FALSE
GOTERM_BP_DIRECT	GO:0030071~regulation of mitotic metaphase/anaphase transition	7	2.5	1.09359e-05	SMARCB1, HECW2, DPF2, ARID1A, SMARCA2, ARID1B, SMARCA4	279	36	19462	13.5637	FALSE
GOTERM_BP_DIRECT	GO:0019228~neuronal action potential	7	2.5	1.5133e-05	SCN8A, KCNA2, KCNQ3, SCN2A, MTOR, CACNA1G, SCN1A	279	38	19462	12.8498	FALSE
GOTERM_BP_DIRECT	GO:0098703~calcium ion import across plasma membrane	7	2.5	1.5133e-05	SCN8A, CACNA1A, CACNA1C, SCN2A, CACNA1E, CACNA1G, SCN1A	279	38	19462	12.8498	FALSE
GOTERM_BP_DIRECT	GO:0001701~in utero embryonic development	14	5	1.61343e-05	SMAD4, NOTCH1, KIDINS220, CHD8, PTCH1, CHD7, GATA3, SOX10, MIB1, SIN3A, CTNNB1, CERT1, FGFR2, KDM6A	279	218	19462	4.47976	FALSE
GOTERM_BP_DIRECT	GO:0051402~neuron apoptotic process	9	3.21429	2.2392e-05	NR4A2, SYNGAP1, STXBP1, ABL1, KCNQ3, KRAS, ADNP, SCN2A, HRAS	279	82	19462	7.65618	FALSE
GOTERM_BP_DIRECT	GO:0043524~negative regulation of neuron apoptotic process	12	4.28571	2.33367e-05	NR4A2, MECP2, GABRB2, MEF2C, SET, SYNGAP1, PIK3CA, STXBP1, BRAF, KRAS, ADNP, HRAS	279	163	19462	5.13543	FALSE
GOTERM_BP_DIRECT	GO:0070316~regulation of G0 to G1 transition	6	2.14286	2.41144e-05	SMARCB1, DPF2, ARID1A, SMARCA2, ARID1B, SMARCA4	279	25	19462	16.7415	FALSE
GOTERM_BP_DIRECT	GO:0051571~positive regulation of histone H3-K4 methylation	6	2.14286	2.41144e-05	SMAD4, AUTS2, KMT2A, KANSL1, CTNNB1, OGT	279	25	19462	16.7415	TRUE
GOTERM_MF_DIRECT	GO:0004386~helicase activity	9	3.21429	3.39349e-05	UPF1, SRCAP, ATRX, CHD7, CHD4, CHD3, CHD2, SMARCA2, SMARCA4	278	85	18976	7.22742	FALSE
GOTERM_BP_DIRECT	GO:2000819~regulation of nucleotide-excision repair	6	2.14286	3.57948e-05	SMARCB1, DPF2, ARID1A, SMARCA2, ARID1B, SMARCA4	279	27	19462	15.5014	FALSE
GOTERM_MF_DIRECT	GO:0001227~transcriptional repressor activity, RNA polymerase II transcription regulatory region sequence-specific binding	17	6.07143	3.86465e-05	ZBTB18, MYT1L, SATB1, BCL11A, NR2F1, ZBTB20, GATA3, CTCF, FOXP2, FOXP1, SKI, YY1, ZEB2, DEAF1, NACC1, ERF, ZNF148	278	337	18976	3.44333	FALSE
GOTERM_BP_DIRECT	GO:0008284~positive regulation of cell proliferation	22	7.85714	4.02594e-05	HDAC4, KMT2D, NOTCH1, CSNK2A1, ODC1, PTEN, SOX11, SMARCA2, MEIS2, POU3F3, PBX1, SMARCA4, MECP2, PURA, NACC1, KRAS, PHIP, RAC1, CDK13, HRAS, FGFR3, FGFR2	279	545	19462	2.81585	FALSE
GOTERM_BP_DIRECT	GO:0006366~transcription from RNA polymerase II promoter	14	5	4.60587e-05	SMAD4, NFIX, NOTCH1, BCL11B, ATRX, CHD7, GATA3, PIK3R1, NR4A2, DEAF1, EP300, CTNNB1, SOX5, TAF1	279	241	19462	4.05223	FALSE
GOTERM_BP_DIRECT	GO:0003007~heart morphogenesis	7	2.5	5.28529e-05	ASXL1, COL2A1, PTCH1, CHD7, CERT1, MTOR, KDM6A	279	47	19462	10.3892	FALSE
GOTERM_BP_DIRECT	GO:1902459~positive regulation of stem cell population maintenance	7	2.5	5.28529e-05	SMARCB1, SIN3A, DPF2, ARID1A, SMARCA2, OGT, SMARCA4	279	47	19462	10.3892	TRUE
GOTERM_MF_DIRECT	GO:0042802~identical protein binding	47	16.7857	5.30032e-05	GABRB3, HDAC4, CAMK2B, KDM5C, SMARCB1, NOTCH1, KMT2A, ANKRD11, STXBP1, PTEN, SLC2A1, HNRNPU, GATA3, SLC6A1, MECP2, PUF60, TLK2, KIF1A, DNM1L, MORC2, MAP3K7, CERT1, CAMK2G, KDM6A, SMAD4, SYT1, CSNK2A1, FBXW7, COG4, DNMT3A, DYRK1A, BRAF, SOX10, DNM1, FOXP2, MTOR, FOXP1, CNKSR2, SKI, COL2A1, HNRNPK, CSNK2B, KRAS, TCF4, FGFR3, FGFR2, FBN1	278	1737	18976	1.84696	FALSE
GOTERM_MF_DIRECT	GO:0005516~calmodulin binding	13	4.64286	6.34776e-05	CAMK2B, SYT1, CASK, CACNA1C, GRIN1, RIT1, KCNQ2, KCNQ3, SCN2A, CAMK2G, SPTAN1, VAMP2, KCNH1	278	210	18976	4.22556	FALSE
GOTERM_BP_DIRECT	GO:0048169~regulation of long-term neuronal synaptic plasticity	5	1.78571	8.374e-05	CAMK2B, SYNGAP1, DLG4, KRAS, HRAS	279	17	19462	20.5166	FALSE
GOTERM_BP_DIRECT	GO:0010592~positive regulation of lamellipodium assembly	6	2.14286	8.4225e-05	HDAC4, AUTS2, PIK3CA, RAC1, PIK3R1, MTOR	279	32	19462	13.0793	FALSE
GOTERM_BP_DIRECT	GO:0000165~MAPK cascade	11	3.92857	8.91418e-05	PPP1CB, MEF2C, MAP2K1, SYNGAP1, TAOK1, CTNNB1, BRAF, KRAS, HRAS, FGFR3, MAP3K7	279	157	19462	4.88738	FALSE
GOTERM_MF_DIRECT	GO:0019901~protein kinase binding	21	7.5	9.1534e-05	HDAC4, TCF7L2, BCL11A, STXBP1, CLTC, PTEN, PTPN11, KIF11, WDR45, DNM1, RHOBTB2, SKI, CNKSR2, PPP1CB, RPS6KA3, DLG4, EEF1A2, ABL1, CTNNB1, RAC1, CDK13	278	523	18976	2.7408	FALSE
GOTERM_MF_DIRECT	GO:0002039~p53 binding	8	2.85714	9.37412e-05	USP7, CREBBP, SMARCB1, CHD8, EP300, EHMT1, SMARCA4, TAF1	278	73	18976	7.48044	FALSE
GOTERM_BP_DIRECT	GO:0044648~histone H3-K4 dimethylation	4	1.42857	9.67195e-05	KMT2D, KMT2A, SETD1A, KMT2B	279	7	19462	39.8607	FALSE
GOTERM_BP_DIRECT	GO:2000463~positive regulation of excitatory postsynaptic potential	6	2.14286	9.81141e-05	GRIN2A, PRKAR1B, DLG4, PTEN, GRIN2B, GRIN1	279	33	19462	12.683	FALSE
GOTERM_BP_DIRECT	GO:0016575~histone deacetylation	7	2.5	0.000105191	HDAC4, SIN3A, TBL1XR1, CHD4, CHD3, HDAC8, GATAD2B	279	53	19462	9.21309	TRUE
GOTERM_BP_DIRECT	GO:2000045~regulation of G1/S transition of mitotic cell cycle	7	2.5	0.000116936	PPP2CA, SMARCB1, DPF2, ARID1A, SMARCA2, ARID1B, SMARCA4	279	54	19462	9.04248	FALSE
GOTERM_MF_DIRECT	GO:0008022~protein C-terminus binding	12	4.28571	0.000125677	MED12, PPP2CA, USP7, MAP2K1, SYT1, DLG4, ABL1, EP300, CTNNB1, TCF4, HRAS, KCNK3	278	192	18976	4.26619	FALSE
GOTERM_MF_DIRECT	GO:0004402~histone acetyltransferase activity	6	2.14286	0.000125764	CREBBP, SRCAP, KAT6B, KAT6A, EP300, TAF1	278	34	18976	12.0457	FALSE
GOTERM_MF_DIRECT	GO:0042826~histone deacetylase binding	10	3.57143	0.000157232	MECP2, HDAC4, H1-4, MEF2C, SATB2, NACC1, HNRNPD, CHD4, BCOR, PHF6	278	134	18976	5.09395	FALSE
GOTERM_BP_DIRECT	GO:0001843~neural tube closure	8	2.85714	0.000158804	MED12, SKI, SETD2, DEAF1, PTCH1, ABL1, ARHGAP35, KDM6A	279	81	19462	6.88951	FALSE
GOTERM_BP_DIRECT	GO:0045582~positive regulation of T cell differentiation	6	2.14286	0.000171991	SMARCB1, GATA3, ARID1A, SMARCA2, ARID1B, SMARCA4	279	37	19462	11.3118	FALSE
GOTERM_BP_DIRECT	GO:0008543~fibroblast growth factor receptor signaling pathway	7	2.5	0.000174725	RAB14, CTNNB1, SHOC2, PTPN11, FGF12, FGFR3, FGFR2	279	58	19462	8.41886	FALSE
GOTERM_MF_DIRECT	GO:0004672~protein kinase activity	17	6.07143	0.000177133	CAMK2B, MAP2K1, CDKL5, CSNK2A1, DYRK1A, CASK, BRAF, MTOR, CDK8, RPS6KA3, TAOK1, ABL1, CDK13, MAP3K7, CAMK2G, FGFR2, TAF1	278	384	18976	3.02188	FALSE
GOTERM_MF_DIRECT	GO:0001221~transcription cofactor binding	6	2.14286	0.000190101	EP300, CTNNB1, CHD4, CTCF, PBX1, SMARCA4	278	37	18976	11.069	FALSE
GOTERM_BP_DIRECT	GO:0048167~regulation of synaptic plasticity	7	2.5	0.000192201	MEF2C, GRIN2A, SYNGAP1, KCNQ3, UBE3A, GRIN2B, GRIN1	279	59	19462	8.27617	FALSE
GOTERM_BP_DIRECT	GO:0045597~positive regulation of cell differentiation	7	2.5	0.000192201	RPS6KA3, SMARCB1, CTNNB1, ARID1A, SMARCA2, ARID1B, SMARCA4	279	59	19462	8.27617	FALSE
GOTERM_BP_DIRECT	GO:0016573~histone acetylation	6	2.14286	0.000195758	MECP2, CREBBP, KAT6B, TRRAP, KAT6A, EP300	279	38	19462	11.0141	FALSE
GOTERM_BP_DIRECT	GO:0051568~histone H3-K4 methylation	5	1.78571	0.00020131	KMT2D, KMT2A, SETD1A, KMT2B, KDM6A	279	21	19462	16.6086	FALSE
GOTERM_BP_DIRECT	GO:0080182~histone H3-K4 trimethylation	5	1.78571	0.00020131	H1-4, KMT2D, KMT2A, SETD1A, OGT	279	21	19462	16.6086	FALSE
GOTERM_BP_DIRECT	GO:0048513~animal organ development	6	2.14286	0.000250719	MEF2C, KAT6A, FGFR3, FOXP2, FGFR2, FOXP1	279	40	19462	10.4634	FALSE
GOTERM_MF_DIRECT	GO:0003678~DNA helicase activity	7	2.5	0.000259605	DDX3X, CHD8, ATRX, CHD7, CHD4, CHD3, CHD2	278	61	18976	7.833	FALSE
GOTERM_MF_DIRECT	GO:0000981~RNA polymerase II transcription factor activity, sequence-specific DNA binding	36	12.8571	0.000275162	NFIX, MYT1L, SATB1, SATB2, FOXG1, ZNF292, GATA3, YY1, PURA, DEAF1, NACC1, HIVEP2, SOX5, ZBTB18, TCF7L2, MEF2C, SMAD4, TFE3, SOX11, EBF3, SOX10, ZFHX4, MEIS2, POU3F3, PBX1, FOXP2, FOXP1, NR4A2, SKI, KLF7, ZEB2, MYCN, NFIA, ERF, TCF4, ADNP	278	1286	18976	1.91083	FALSE
GOTERM_MF_DIRECT	GO:0031492~nucleosomal DNA binding	6	2.14286	0.00031164	H1-4, SMARCB1, CHD4, GATAD2B, H3-3A, SMARCA4	278	41	18976	9.98912	TRUE
GOTERM_BP_DIRECT	GO:2000781~positive regulation of double-strand break repair	6	2.14286	0.000316674	SMARCB1, DPF2, ARID1A, SMARCA2, ARID1B, SMARCA4	279	42	19462	9.96518	FALSE
GOTERM_BP_DIRECT	GO:0042752~regulation of circadian rhythm	7	2.5	0.000328054	PPP1CB, USP7, FBXW7, USP9X, HNRNPD, UBE3A, MTOR	279	65	19462	7.51221	FALSE
GOTERM_MF_DIRECT	GO:0005249~voltage-gated potassium channel activity	7	2.5	0.00033798	SNAP25, KCNB1, KCND3, KCNA2, KCNQ2, KCNQ3, KCNH1	278	64	18976	7.46583	FALSE
GOTERM_MF_DIRECT	GO:0045322~unmethylated CpG binding	4	1.42857	0.000342231	MECP2, KMT2A, DNMT3A, KMT2B	278	10	18976	27.3036	FALSE
GOTERM_BP_DIRECT	GO:0045815~positive regulation of gene expression, epigenetic	6	2.14286	0.0003542	SMARCB1, KMT2A, EP300, ARID1A, ARID1B, SMARCA4	279	43	19462	9.73343	FALSE
GOTERM_BP_DIRECT	GO:0060291~long-term synaptic potentiation	7	2.5	0.000356593	MECP2, SNAP25, GRIN2A, PTEN, BRAF, GRIN2B, VAMP2	279	66	19462	7.39839	FALSE
GOTERM_BP_DIRECT	GO:0006974~cellular response to DNA damage stimulus	14	5	0.000378327	FBXW7, SETD1A, CBL, CHD2, MTOR, FOXP1, YY1, TAOK1, TLK2, ABL1, WAC, TRIP12, MORC2, TAF1	279	298	19462	3.27714	FALSE
GOTERM_BP_DIRECT	GO:0001764~neuron migration	9	3.21429	0.000391338	NR4A2, MEF2C, CDKL5, AUTS2, USP9X, SATB2, CTNNB1, GATA3, RAC1	279	123	19462	5.10412	FALSE
GOTERM_BP_DIRECT	GO:0070509~calcium ion import	5	1.78571	0.000406793	CACNA1A, CASK, CACNA1C, CACNA1E, CACNA1G	279	25	19462	13.9513	FALSE
GOTERM_BP_DIRECT	GO:0032259~methylation	9	3.21429	0.000413244	KMT2D, SETD5, KDM5C, NSD1, KMT2C, SETD1A, NSD2, KMT2B, KMT5B	279	124	19462	5.06296	FALSE
GOTERM_MF_DIRECT	GO:0070577~lysine-acetylated histone binding	5	1.78571	0.000441328	KMT2A, DPF2, PHIP, SMARCA4, TAF1	278	25	18976	13.6518	FALSE
GOTERM_BP_DIRECT	GO:0045663~positive regulation of myoblast differentiation	6	2.14286	0.000487109	MEF2C, SMARCB1, ARID1A, SMARCA2, ARID1B, SMARCA4	279	46	19462	9.09864	FALSE
GOTERM_BP_DIRECT	GO:0010468~regulation of gene expression	13	4.64286	0.000551759	KDM6B, SETD2, CHD7, DNMT3A, AFF3, FOXP1, COL2A1, HNRNPK, POGZ, HNRNPD, ADNP, DNM1L, KDM6A	279	271	19462	3.34624	FALSE
GOTERM_BP_DIRECT	GO:1902275~regulation of chromatin organization	4	1.42857	0.000576534	SETD5, SETD1A, TLK2, HNRNPU	279	12	19462	23.2521	FALSE
GOTERM_MF_DIRECT	GO:0005216~ion channel activity	6	2.14286	0.000594037	GABRB3, GABRB2, ITPR1, CACNA1A, CACNA1C, KCNK3	278	47	18976	8.71391	FALSE
GOTERM_BP_DIRECT	GO:0075342~disruption by symbiont of host cell PML body	3	1.07143	0.000604181	USP7, CSNK2A1, CSNK2B	279	3	19462	69.7563	FALSE
GOTERM_MF_DIRECT	GO:1990837~sequence-specific double-stranded DNA binding	20	7.14286	0.000610366	ZBTB18, KDM5B, MEF2C, NFIX, BCL11B, FOXG1, TFE3, NR2F1, HNRNPU, ZBTB20, GATA3, SOX10, MEIS2, PBX1, FOXP1, NR4A2, YY1, MYCN, ABL1, TCF4	278	560	18976	2.43782	FALSE
GOTERM_MF_DIRECT	GO:0046975~histone methyltransferase activity (H3-K36 specific)	4	1.42857	0.000613976	SETD5, SETD2, NSD1, NSD2	278	12	18976	22.753	FALSE
GOTERM_BP_DIRECT	GO:0006468~protein phosphorylation	17	6.07143	0.000707571	CAMK2B, MAP2K1, CDKL5, CSNK2A1, MAST1, DYRK1A, BRAF, PIK3R1, MTOR, CDK8, PRKAR1B, TAOK1, CSNK2B, TLK2, ABL1, CDK13, TAF1	279	445	19462	2.66485	TRUE
GOTERM_BP_DIRECT	GO:0098976~excitatory chemical synaptic transmission	4	1.42857	0.000741598	GRIN2A, KCNQ3, GRIN2B, GRIN1	279	13	19462	21.4635	FALSE
GOTERM_MF_DIRECT	GO:0001228~transcriptional activator activity, RNA polymerase II transcription regulatory region sequence-specific binding	18	6.42857	0.000778937	MEF2C, SMAD4, BCL11B, SATB2, ZNF292, TFE3, SOX11, EBF3, GATA3, SOX10, MEIS2, PBX1, NR4A2, YY1, KLF7, MYCN, NFIA, TCF4	278	483	18976	2.54381	FALSE
GOTERM_MF_DIRECT	GO:0018024~histone-lysine N-methyltransferase activity	5	1.78571	0.000791491	SETD2, NSD1, NSD2, EHMT1, KMT5B	278	29	18976	11.7688	FALSE
GOTERM_BP_DIRECT	GO:0071805~potassium ion transmembrane transport	9	3.21429	0.000839411	SNAP25, KCNT1, KCNB1, KCND3, KCNA2, KCNQ2, KCNQ3, KCNK3, KCNH1	279	138	19462	4.54932	FALSE
GOTERM_BP_DIRECT	GO:0043984~histone H4-K16 acetylation	4	1.42857	0.000933916	KMT2A, KANSL1, MSL2, OGT	279	14	19462	19.9304	FALSE
GOTERM_MF_DIRECT	GO:0003723~RNA binding	38	13.5714	0.000948556	ARF1, DDX3X, KMT2C, STXBP1, DDX23, CLTC, HNRNPU, TCF20, CHD3, CHD2, PHF6, PRPF8, YY1, MECP2, EFTUD2, PURA, PUF60, U2AF2, SIN3A, UBTF, SRRM2, SPEN, DSP, UPF1, DYNC1H1, SETD1A, HUWE1, ALG13, SMC1A, DNM1, SMARCA4, H1-4, HNRNPK, SON, AGO1, HNRNPD, NAA15, CDK13	278	1483	18976	1.74905	TRUE
GOTERM_MF_DIRECT	GO:0005525~GTP binding	16	5.71429	0.00099961	ARF1, GNAI1, ARHGAP35, DNM1, RHOBTB2, GNAO1, EFTUD2, RIT1, RAB14, EEF1A2, GNAS, MFN2, KRAS, RAC1, DNM1L, HRAS	278	407	18976	2.6834	FALSE
GOTERM_BP_DIRECT	GO:0009887~animal organ morphogenesis	9	3.21429	0.00101075	ASXL1, ASXL3, PTCH1, EP300, BRAF, HRAS, MEIS2, FGFR2, PBX1	279	142	19462	4.42117	FALSE
GOTERM_MF_DIRECT	GO:0047485~protein N-terminus binding	8	2.85714	0.00104121	SRRM2, MECP2, MAP2K1, CSNK2A1, KCNB1, TBL1XR1, STXBP1, SMARCA4	278	108	18976	5.05622	FALSE
GOTERM_BP_DIRECT	GO:0007165~signal transduction	34	12.1429	0.0011042	GABRB3, CAMK2B, GABRB2, GRIA2, ITPR1, PIK3R2, GATA3, PIK3R1, CBL, ARHGAP35, RPS6KA3, SYNGAP1, SHOC2, RAC1, HRAS, CERT1, GABRA1, MAP2K1, CREBBP, CSNK2A1, NR2F1, PPP2R5D, BRAF, NR4A2, RIT1, HNRNPK, DLG4, GNB2, GNB1, CSNK2B, KRAS, FGF12, OGT, FBN1	279	1310	19462	1.81047	FALSE
GOTERM_BP_DIRECT	GO:0050793~regulation of developmental process	4	1.42857	0.00115511	NOTCH1, BRPF1, KAT6B, KAT6A	279	15	19462	18.6017	FALSE
GOTERM_MF_DIRECT	GO:0044877~macromolecular complex binding	15	5.35714	0.00116813	UPF1, PTCH1, HNRNPU, BRAF, ARHGAP35, GRIN1, SPAST, KAT6B, DLG4, SIN3A, GNB2, GNB1, KRAS, RAC1, FBN1	278	371	18976	2.7598	FALSE
GOTERM_MF_DIRECT	GO:0005251~delayed rectifier potassium channel activity	5	1.78571	0.00130266	KCNB1, KCNA2, KCNQ2, KCNQ3, KCNH1	278	33	18976	10.3423	FALSE
GOTERM_BP_DIRECT	GO:0010628~positive regulation of gene expression	18	6.42857	0.00135295	KDM5B, MAP2K1, MEF2C, NOTCH1, DDX3X, BCL11A, BRAF, SOX11, CTCF, SOX10, MTOR, POU3F3, YY1, MYCN, KAT6A, CTNNB1, KRAS, KDM6A	279	519	19462	2.41929	FALSE
GOTERM_BP_DIRECT	GO:0006473~protein acetylation	4	1.42857	0.00140673	CREBBP, NAA10, KAT6A, EP300	279	16	19462	17.4391	FALSE
GOTERM_BP_DIRECT	GO:0086010~membrane depolarization during action potential	4	1.42857	0.00140673	SCN8A, SCN2A, CACNA1G, SCN1A	279	16	19462	17.4391	FALSE
GOTERM_BP_DIRECT	GO:0086002~cardiac muscle cell action potential involved in contraction	4	1.42857	0.00140673	CACNA1C, FGF12, CACNA1G, SCN1A	279	16	19462	17.4391	FALSE
GOTERM_BP_DIRECT	GO:0065003~macromolecular complex assembly	9	3.21429	0.00143708	CREBBP, KMT2A, DLG4, PPP2R1A, CSNK2B, SLC2A1, ZNF148, DNM1L, VAMP2	279	150	19462	4.18538	FALSE
GOTERM_BP_DIRECT	GO:0050804~modulation of synaptic transmission	7	2.5	0.00145553	GRIA2, PSMC5, CDKL5, PRKAR1B, IQSEC2, CACNA1A, DNM1	279	86	19462	5.67784	FALSE
GOTERM_BP_DIRECT	GO:0032435~negative regulation of proteasomal ubiquitin-dependent protein catabolic process	5	1.78571	0.00167474	USP7, USP9X, TLK2, WAC, OGT	279	36	19462	9.68837	FALSE
GOTERM_BP_DIRECT	GO:0034644~cellular response to UV	6	2.14286	0.00177693	YY1, CREBBP, FBXW7, EP300, PIK3R1, TAF1	279	61	19462	6.86127	FALSE
GOTERM_BP_DIRECT	GO:0042220~response to cocaine	5	1.78571	0.00185689	MECP2, EFTUD2, DNMT3A, UBE3A, SLC6A1	279	37	19462	9.42652	TRUE
GOTERM_BP_DIRECT	GO:0014009~glial cell proliferation	4	1.42857	0.00200699	MECP2, NFIA, KRAS, SOX11	279	18	19462	15.5014	FALSE
GOTERM_BP_DIRECT	GO:0010288~response to lead ion	4	1.42857	0.00200699	PPP2CA, MECP2, DNMT3A, SLC6A1	279	18	19462	15.5014	FALSE
GOTERM_BP_DIRECT	GO:0014065~phosphatidylinositol 3-kinase signaling	5	1.78571	0.00205232	PIK3CA, PTEN, PIK3R2, GATA3, PIK3R1	279	38	19462	9.17846	FALSE
GOTERM_BP_DIRECT	GO:0045666~positive regulation of neuron differentiation	7	2.5	0.00205641	MEF2C, SIN3A, ZC4H2, FOXG1, SHOC2, SOX11, TCF4	279	92	19462	5.30754	FALSE
GOTERM_MF_DIRECT	GO:0019905~syntaxin binding	6	2.14286	0.00225274	SNAP25, SYT1, STXBP1, ABL1, CACNA1A, VAMP2	278	63	18976	6.50086	FALSE
GOTERM_BP_DIRECT	GO:0006337~nucleosome disassembly	4	1.42857	0.0023583	SET, SMARCB1, ARID1A, SMARCA4	279	19	19462	14.6855	FALSE
GOTERM_BP_DIRECT	GO:0007049~cell cycle	14	5	0.00268351	KMT2E, SMARCB1, CSNK2A1, USP9X, HNRNPU, KIF11, GNAI1, PPP1CB, RPS6KA3, SPAST, TLK2, EP300, ZMYND11, TAF1	279	370	19462	2.63943	FALSE
GOTERM_MF_DIRECT	GO:1904315~transmitter-gated ion channel activity involved in regulation of postsynaptic membrane potential	5	1.78571	0.00268608	GABRB2, GABRA1, GRIA2, GRIN2A, GRIN2B	278	40	18976	8.53237	FALSE
GOTERM_BP_DIRECT	GO:0035264~multicellular organism growth	7	2.5	0.00282813	TBL1XR1, ATRX, EP300, PTPN11, MTOR, H3-3A, KDM6A	279	98	19462	4.98259	FALSE
GOTERM_BP_DIRECT	GO:0007611~learning or memory	6	2.14286	0.00287197	MEF2C, GRIN2A, PRKAR1B, PTEN, EP300, GRIN2B	279	68	19462	6.15497	FALSE
GOTERM_MF_DIRECT	GO:1990841~promoter-specific chromatin binding	6	2.14286	0.00295276	MECP2, HDAC4, TCF7L2, CHD7, HNRNPU, SOX10	278	67	18976	6.11275	TRUE
GOTERM_BP_DIRECT	GO:1901796~regulation of signal transduction by p53 class mediator	5	1.78571	0.00297635	USP7, KAT6A, EP300, MTOR, TAF1	279	42	19462	8.30432	FALSE
GOTERM_MF_DIRECT	GO:0022849~glutamate-gated calcium ion channel activity	3	1.07143	0.00306378	GRIN2A, GRIN2B, GRIN1	278	6	18976	34.1295	FALSE
GOTERM_BP_DIRECT	GO:0032956~regulation of actin cytoskeleton organization	7	2.5	0.00312813	TAOK1, ABL1, RAC1, HRAS, MTOR, ARHGAP35, RHOBTB2	279	100	19462	4.88294	FALSE
GOTERM_BP_DIRECT	GO:0001501~skeletal system development	8	2.85714	0.0031656	HDAC4, RPS6KA3, RAI1, COL2A1, CHD7, SOX11, FGFR3, FBN1	279	134	19462	4.16455	FALSE
GOTERM_BP_DIRECT	GO:0071560~cellular response to transforming growth factor beta stimulus	6	2.14286	0.00325858	MEF2C, KMT2A, ABL1, FGFR2, SOX5, FBN1	279	70	19462	5.97911	FALSE
GOTERM_BP_DIRECT	GO:0032922~circadian regulation of gene expression	6	2.14286	0.00346532	PPP1CB, RAI1, KMT2A, HUWE1, HNRNPU, OGT	279	71	19462	5.8949	FALSE
GOTERM_MF_DIRECT	GO:0005261~cation channel activity	5	1.78571	0.00350547	SCN8A, CACNA1A, SCN2A, TRPM3, SCN1A	278	43	18976	7.93709	FALSE
GOTERM_MF_DIRECT	GO:0016922~ligand-dependent nuclear receptor binding	5	1.78571	0.00381244	TCF7L2, EP300, CTNNB1, ARID1A, TAF1	278	44	18976	7.7567	FALSE
GOTERM_MF_DIRECT	GO:0032452~histone demethylase activity	4	1.42857	0.00385836	KDM6B, KDM5B, KDM5C, KDM6A	278	22	18976	12.4107	FALSE
GOTERM_BP_DIRECT	GO:1904062~regulation of cation transmembrane transport	3	1.07143	0.00407202	GRIN2A, GRIN2B, GRIN1	279	7	19462	29.8955	FALSE
GOTERM_BP_DIRECT	GO:0060992~response to fungicide	3	1.07143	0.00407202	KDM6B, KDM5B, EHMT1	279	7	19462	29.8955	FALSE
GOTERM_MF_DIRECT	GO:0042799~histone methyltransferase activity (H4-K20 specific)	3	1.07143	0.00424804	NSD1, NSD2, KMT5B	278	7	18976	29.2539	FALSE
GOTERM_MF_DIRECT	GO:0015271~outward rectifier potassium channel activity	4	1.42857	0.0043897	KCNT1, KCNB1, KCNA2, KCNK3	278	23	18976	11.8711	FALSE
GOTERM_MF_DIRECT	GO:0017075~syntaxin-1 binding	4	1.42857	0.0043897	SNAP25, SYT1, STXBP1, VAMP2	278	23	18976	11.8711	FALSE
GOTERM_BP_DIRECT	GO:0009653~anatomical structure morphogenesis	8	2.85714	0.00470082	SMAD4, DEAF1, ANKRD11, SOX11, GATA3, RAC1, SOX10, FBN1	279	144	19462	3.87535	FALSE
GOTERM_BP_DIRECT	GO:0046777~protein autophosphorylation	9	3.21429	0.00473584	CAMK2B, CDKL5, TAOK1, DYRK1A, ABL1, FGFR3, FGFR2, MTOR, TAF1	279	182	19462	3.44949	FALSE
GOTERM_MF_DIRECT	GO:0004721~phosphoprotein phosphatase activity	5	1.78571	0.00484145	PPP2CA, PTEN, PTPN11, PPP2R5D, PPM1D	278	47	18976	7.26159	FALSE
GOTERM_MF_DIRECT	GO:0005248~voltage-gated sodium channel activity	4	1.42857	0.00496323	SCN8A, SCN2A, CACNA1G, SCN1A	278	24	18976	11.3765	FALSE
GOTERM_MF_DIRECT	GO:0001784~phosphotyrosine binding	5	1.78571	0.00522201	ABL1, PIK3R2, PTPN11, PIK3R1, CBL	278	48	18976	7.11031	FALSE
GOTERM_MF_DIRECT	GO:0001223~transcription coactivator binding	5	1.78571	0.00522201	SMAD4, CREBBP, EP300, GATA3, MAP3K7	278	48	18976	7.11031	FALSE
GOTERM_BP_DIRECT	GO:0048589~developmental growth	4	1.42857	0.00525524	SMAD4, GNAS, GATA3, SOX10	279	25	19462	11.161	FALSE
GOTERM_BP_DIRECT	GO:0014003~oligodendrocyte development	4	1.42857	0.00525524	MED12, MECP2, SOX11, SOX10	279	25	19462	11.161	FALSE
GOTERM_BP_DIRECT	GO:2000617~positive regulation of histone H3-K9 acetylation	3	1.07143	0.00537832	SMAD4, SMARCB1, GATA3	279	8	19462	26.1586	FALSE
GOTERM_BP_DIRECT	GO:0043966~histone H3 acetylation	5	1.78571	0.00560303	BRPF1, KAT6B, TRRAP, KAT6A, MAP3K7	279	50	19462	6.97563	FALSE
GOTERM_BP_DIRECT	GO:0050821~protein stabilization	10	3.57143	0.00581027	USP7, CSNK2A1, FBXW7, USP9X, STXBP1, PTEN, EP300, NAA15, PIK3R1, TAF1	279	229	19462	3.04613	FALSE
GOTERM_BP_DIRECT	GO:0035235~ionotropic glutamate receptor signaling pathway	4	1.42857	0.00587869	GRIA2, GRIN2A, GRIN2B, GRIN1	279	26	19462	10.7317	FALSE
GOTERM_BP_DIRECT	GO:0007062~sister chromatid cohesion	4	1.42857	0.00587869	STAG2, FBXW7, SMC1A, HDAC8	279	26	19462	10.7317	FALSE
GOTERM_BP_DIRECT	GO:0070374~positive regulation of ERK1 and ERK2 cascade	10	3.57143	0.00597394	MAP2K1, NOTCH1, FBXW7, PTEN, ABL1, BRAF, PTPN11, HRAS, FGFR3, FGFR2	279	230	19462	3.03288	FALSE
GOTERM_BP_DIRECT	GO:0007173~epidermal growth factor receptor signaling pathway	5	1.78571	0.00601284	PIK3CA, ABL1, BRAF, PTPN11, CBL	279	51	19462	6.83885	FALSE
GOTERM_BP_DIRECT	GO:0097553~calcium ion transmembrane import into cytosol	3	1.07143	0.00685005	GRIN2A, GRIN2B, GRIN1	279	9	19462	23.2521	FALSE
GOTERM_BP_DIRECT	GO:0008285~negative regulation of cell proliferation	15	5.35714	0.00688636	HDAC4, MAP2K1, SMAD4, SMARCB1, NOTCH1, BCL11B, PTEN, GATA3, CTCF, PPM1D, SMARCA2, SKI, CSNK2B, CTNNB1, HRAS	279	462	19462	2.26481	FALSE
GOTERM_MF_DIRECT	GO:0050681~androgen receptor binding	4	1.42857	0.00694566	NSD1, EP300, SMARCA4, FOXP1	278	27	18976	10.1124	FALSE
GOTERM_BP_DIRECT	GO:0051091~positive regulation of sequence-specific DNA binding transcription factor activity	7	2.5	0.00699801	HDAC4, SMARCB1, ZC4H2, PTEN, EP300, CTNNB1, SMARCA4	279	118	19462	4.13808	FALSE
GOTERM_MF_DIRECT	GO:0061733~peptide-lysine-N-acetyltransferase activity	3	1.07143	0.00714321	CREBBP, KAT6B, EP300	278	9	18976	22.753	FALSE
GOTERM_MF_DIRECT	GO:0004972~NMDA glutamate receptor activity	3	1.07143	0.00714321	GRIN2A, GRIN2B, GRIN1	278	9	18976	22.753	FALSE
GOTERM_BP_DIRECT	GO:0001835~blastocyst hatching	4	1.42857	0.0072535	SMARCB1, TBL1XR1, BCOR, PHF6	279	28	19462	9.96518	FALSE
GOTERM_BP_DIRECT	GO:0035116~embryonic hindlimb morphogenesis	4	1.42857	0.0072535	NOTCH1, CHD7, CTNNB1, AFF3	279	28	19462	9.96518	FALSE
GOTERM_MF_DIRECT	GO:0046332~SMAD binding	5	1.78571	0.00742598	SKI, YY1, PURA, SMAD4, CTNNB1	278	53	18976	6.43953	FALSE
GOTERM_BP_DIRECT	GO:0006470~protein dephosphorylation	7	2.5	0.00788023	PPP2CA, PPP1CB, PPP2R1A, PTEN, PTPN11, PPP2R5D, PPM1D	279	121	19462	4.03549	FALSE
GOTERM_BP_DIRECT	GO:0002062~chondrocyte differentiation	5	1.78571	0.00836147	MEF2C, COL2A1, CTNNB1, FGFR3, SOX5	279	56	19462	6.22824	FALSE
GOTERM_BP_DIRECT	GO:0042472~inner ear morphogenesis	5	1.78571	0.00836147	COL2A1, FOXG1, CHD7, GATA3, FGFR2	279	56	19462	6.22824	FALSE
GOTERM_BP_DIRECT	GO:0007191~adenylate cyclase-activating dopamine receptor signaling pathway	3	1.07143	0.00848226	GNB1, GNAS, ADCY5	279	10	19462	20.9269	FALSE
GOTERM_BP_DIRECT	GO:1901838~positive regulation of transcription of nuclear large rRNA transcript from RNA polymerase I promoter	3	1.07143	0.00848226	SMARCB1, MTOR, SMARCA4	279	10	19462	20.9269	FALSE
GOTERM_BP_DIRECT	GO:0001188~RNA polymerase I transcriptional preinitiation complex assembly	3	1.07143	0.00848226	SMARCB1, UBTF, SMARCA4	279	10	19462	20.9269	FALSE
GOTERM_BP_DIRECT	GO:0010976~positive regulation of neuron projection development	7	2.5	0.00851117	CAMK2B, BCL11A, KIDINS220, EP300, SHOC2, ADNP, ARHGAP35	279	123	19462	3.96987	FALSE
GOTERM_BP_DIRECT	GO:0042593~glucose homeostasis	7	2.5	0.00851117	KLF7, TCF7L2, MBD5, KCNB1, PTCH1, PTPN11, FBN1	279	123	19462	3.96987	FALSE
GOTERM_MF_DIRECT	GO:0001164~RNA polymerase I CORE element sequence-specific DNA binding	3	1.07143	0.00884345	SMARCB1, UBTF, SMARCA4	278	10	18976	20.4777	FALSE
GOTERM_MF_DIRECT	GO:0001540~beta-amyloid binding	6	2.14286	0.00893462	GRIA2, GRIN2A, CACNA1A, ATP1A3, GRIN2B, GRIN1	278	87	18976	4.70752	FALSE
GOTERM_BP_DIRECT	GO:0048009~insulin-like growth factor receptor signaling pathway	4	1.42857	0.00964501	GIGYF1, MAP2K1, PIK3CA, PIK3R1	279	31	19462	9.00081	FALSE
GOTERM_BP_DIRECT	GO:0048873~homeostasis of number of cells within a tissue	4	1.42857	0.00964501	NOTCH1, KMT2A, PTPN11, KRAS	279	31	19462	9.00081	FALSE
