# Supplementary material for: Deep generative modeling of the human proteome reveals over a hundred novel genes involved in rare genetic disorders
Source: Research Square preprint supplement (doi:10.21203/rs.3.rs-3740259/v1), 2024-01-03
Supplement: Supplementary file 8 [file 9c511d0c00e3076aa3d5c5a0.xlsx]

## Sheet: Key
column	description
chrom	GRCh37 chromosome
gene	Gene symbol
protein	RefSeq protein id
min_score	Minimum popEVE score seen in SDD metacohort
missense	Number of de novo missense variants seen in SDD metacohort
severe_mis	Number of popEVE severe de novo missense variants seen in SDD metacohort
mod_mis	Number of popEVE moderate de novo missense variants seen in SDD metacohort
ambi_mis	Number of popEVE ambiguous de novo missense variants seen in SDD metacohort
benign_mis	Number of popEVE benign de novo missense variants seen in SDD metacohort
s_obs	Summed popEVE score in SDD metacohort
s_exp	Expected summed popEVE score given number of seen variants
n_exp	Number of expected de novo missense variants given background mutation rate
collapse_pvalue	popEVE gene collapsing p-value
collapse_sig	Gene collapse significant (p<2.7e-6)
threshold_sig	Min popEVE score in cases below severe threshold (popEVE<=-5.056)
sig	Either collapse or threshold sig and not flagged
ukbb_flag	Fails to get 10x coverage in at least 95% of UKBB participants
pathogenic_flag	popEVE model pathogenicity is an outlier
constraint_flag	Gene fails DeNovoWEST mutation rate background constraint check
ddg2p	Gene is in DDG2P database, known developmental disorder gene
dnw	Gene is significant in DeNovoWEST analysis
dnw_missense	Gene is significant in DeNovoWEST analysis with missense variants only
known	Gene is known either in DDG2P or labels from the three metacohort centers

## Sheet: SuppTable03
chrom	gene	protein	min_score	missense	severe_mis	mod_mis	ambi_mis	benign_mis	s_obs	s_exp	n_exp	collapse_pvalue	collapse_sig	threshold_sig	sig	ukbb_flag	pathogenic_flag	constraint_flag	ddg2p	dnw	dnw_missense	known
2	SCN2A	NP_066287.2	-7.655	58	39	6	12	1	-169.764	-5.24096	3.3136	0	TRUE	TRUE	TRUE	FALSE	FALSE	FALSE	TRUE	TRUE	TRUE	TRUE
5	MEF2C	NP_002388.2	-7.5675	13	10	0	2	1	-48.6992	-1.83496	0.977954	0	TRUE	TRUE	TRUE	FALSE	FALSE	FALSE	TRUE	TRUE	TRUE	TRUE
14	YY1	NP_003394.1	-7.4625	5	4	0	1	0	-17.1443	-1.2532	0.832283	1.66793e-14	TRUE	TRUE	TRUE	FALSE	FALSE	FALSE	TRUE	TRUE	FALSE	TRUE
X	SLC16A2	NP_006508.2	-7.3745	5	4	0	1	0	-16.4672	-0.776998	0.522986	8.23987e-15	TRUE	TRUE	TRUE	FALSE	FALSE	FALSE	TRUE	FALSE	FALSE	TRUE
5	ETF1	NP_004721.1	-7.16	3	3	0	0	0	-11.2138	-1.7223	0.710662	8.90293e-09	TRUE	TRUE	TRUE	FALSE	FALSE	FALSE	FALSE	FALSE	FALSE	FALSE
X	HDAC8	NP_060956.1	-7.137	13	12	1	0	0	-45.6523	-0.778866	0.315819	0	TRUE	TRUE	TRUE	FALSE	FALSE	FALSE	TRUE	TRUE	TRUE	TRUE
16	SIAH1	NP_001006611.1	-6.9875	3	2	1	0	0	-9.82775	-0.895715	0.466724	8.14775e-09	TRUE	TRUE	TRUE	FALSE	FALSE	FALSE	TRUE	FALSE	FALSE	TRUE
12	PCBP2	NP_005007.2	-6.965	4	2	1	0	1	-9.8705	-1.30488	0.658073	8.1039e-08	TRUE	TRUE	TRUE	FALSE	FALSE	FALSE	TRUE	FALSE	FALSE	TRUE
9	STXBP1	NP_003156.1	-6.9585	47	28	10	9	0	-125.85	-1.87673	1.31368	0	TRUE	TRUE	TRUE	FALSE	FALSE	FALSE	TRUE	TRUE	TRUE	TRUE
2	EXOC6B	NP_056004.1	-6.956	2	1	0	0	1	-4.4115	-0.701231	1.35865	0.00142032	FALSE	TRUE	TRUE	FALSE	FALSE	FALSE	FALSE	FALSE	FALSE	TRUE
5	PURA	NP_005850.1	-6.936	19	18	0	1	0	-69.1257	-1.87555	0.832617	0	TRUE	TRUE	TRUE	FALSE	FALSE	FALSE	TRUE	TRUE	TRUE	TRUE
3	TBL1XR1	NP_078941.2	-6.915	22	18	3	0	1	-70.8645	-1.52271	0.774684	0	TRUE	TRUE	TRUE	FALSE	FALSE	FALSE	TRUE	TRUE	TRUE	TRUE
16	GNAO1	NP_066268.1	-6.839	37	35	0	2	0	-128.005	-1.63838	0.849274	0	TRUE	TRUE	TRUE	FALSE	FALSE	FALSE	TRUE	TRUE	TRUE	TRUE
1	RBBP4	NP_005601.1	-6.8185	4	4	0	0	0	-15.049	-1.96037	0.720706	8.96687e-12	TRUE	TRUE	TRUE	FALSE	FALSE	FALSE	FALSE	FALSE	FALSE	FALSE
12	CACNA1C	NP_000710.5	-6.812	17	6	4	6	1	-36.8777	-5.90243	4.5697	0	TRUE	TRUE	TRUE	FALSE	FALSE	FALSE	TRUE	TRUE	TRUE	TRUE
19	U2AF2	NP_009210.1	-6.8105	8	8	0	0	0	-27.3345	-2.50454	1.2997	0	TRUE	TRUE	TRUE	FALSE	FALSE	FALSE	TRUE	TRUE	TRUE	TRUE
9	WDR5	NP_438172.1	-6.81	4	3	0	0	1	-9.721	-0.719357	0.385631	6.6697e-09	TRUE	TRUE	TRUE	FALSE	FALSE	FALSE	FALSE	FALSE	FALSE	FALSE
2	PPP1CB	NP_996759.1	-6.7885	23	19	2	2	0	-61.9117	-1.23463	0.47398	0	TRUE	TRUE	TRUE	FALSE	FALSE	FALSE	TRUE	TRUE	TRUE	TRUE
X	OGT	NP_858058.1	-6.7535	7	6	0	1	0	-20.5068	-2.57677	1.04392	7.37167e-16	TRUE	TRUE	TRUE	FALSE	FALSE	FALSE	TRUE	TRUE	TRUE	TRUE
4	UBE2D3	NP_871621.1	-6.7345	1	1	0	0	0	-4.78025	-0.650617	0.26343	7.43737e-05	FALSE	TRUE	TRUE	FALSE	FALSE	FALSE	FALSE	FALSE	FALSE	FALSE
X	DDX3X	NP_001180345.1	-6.687	68	60	6	2	0	-208.46	-1.15357	0.471119	0	TRUE	TRUE	TRUE	FALSE	FALSE	FALSE	TRUE	TRUE	TRUE	TRUE
16	USP7	NP_003461.2	-6.6635	8	2	2	4	0	-17.3775	-3.02866	1.93233	2.52547e-10	TRUE	TRUE	TRUE	FALSE	FALSE	FALSE	TRUE	TRUE	FALSE	TRUE
12	CHD4	NP_001264.2	-6.6515	15	9	0	6	0	-50.1585	-5.61839	3.67232	0	TRUE	TRUE	TRUE	FALSE	FALSE	FALSE	TRUE	TRUE	TRUE	TRUE
3	EIF4A2	NP_001958.2	-6.6425	2	1	1	0	0	-6.1075	-1.3856	0.628961	8.48306e-05	FALSE	TRUE	TRUE	FALSE	FALSE	FALSE	FALSE	FALSE	FALSE	FALSE
14	PPP2R5C	NP_001155197.1	-6.642	2	2	0	0	0	-6.553	-1.18697	0.726649	4.05255e-05	FALSE	TRUE	TRUE	FALSE	FALSE	FALSE	FALSE	FALSE	FALSE	TRUE
1	AGO1	NP_036331.1	-6.631	9	2	0	5	2	-15.5378	-2.71165	1.83413	3.03951e-09	TRUE	TRUE	TRUE	FALSE	FALSE	FALSE	TRUE	TRUE	TRUE	TRUE
X	ZC4H2	NP_061154.1	-6.6085	7	6	0	1	0	-22.3672	-0.36462	0.228742	0	TRUE	TRUE	TRUE	FALSE	FALSE	FALSE	TRUE	TRUE	TRUE	TRUE
9	SMARCA2	NP_003061.3	-6.6065	35	16	6	11	2	-82.0932	-3.95858	3.03324	0	TRUE	TRUE	FALSE	FALSE	FALSE	TRUE	TRUE	TRUE	TRUE	TRUE
1	CACNA1E	NP_000712.2	-6.601	15	6	7	2	0	-42.2527	-5.84989	4.55083	0	TRUE	TRUE	TRUE	FALSE	FALSE	FALSE	TRUE	TRUE	TRUE	TRUE
1	ATP1A1	NP_001153705.1	-6.5765	3	1	0	2	0	-6.49575	-3.21424	1.92816	0.00321248	FALSE	TRUE	TRUE	FALSE	FALSE	FALSE	TRUE	FALSE	FALSE	TRUE
12	GRIN2B	NP_000825.2	-6.564	54	30	17	6	1	-143.221	-2.97391	1.81537	0	TRUE	TRUE	TRUE	FALSE	FALSE	FALSE	TRUE	TRUE	TRUE	TRUE
X	RPS6KA3	NP_004577.1	-6.562	4	3	0	1	0	-11.7485	-1.1049	0.443617	6.13331e-09	TRUE	TRUE	TRUE	FALSE	FALSE	FALSE	TRUE	TRUE	FALSE	TRUE
3	SLC6A1	NP_003033.3	-6.519	34	23	2	8	1	-89.006	-1.84566	1.11841	0	TRUE	TRUE	TRUE	FALSE	FALSE	FALSE	TRUE	TRUE	TRUE	TRUE
9	VCP	NP_009057.1	-6.4995	9	5	2	2	0	-22.8257	-2.98307	1.45524	0	TRUE	TRUE	TRUE	FALSE	FALSE	FALSE	TRUE	FALSE	FALSE	TRUE
5	CAMK2A	NP_741960.1	-6.421	5	2	1	2	0	-12.2717	-1.24345	0.624269	2.32163e-10	TRUE	TRUE	TRUE	FALSE	FALSE	FALSE	TRUE	FALSE	FALSE	TRUE
15	ANP32A	NP_006296.1	-6.418	1	1	0	0	0	-3.79825	-0.582383	0.482943	0.000810251	FALSE	TRUE	TRUE	FALSE	FALSE	FALSE	FALSE	FALSE	FALSE	FALSE
5	NR2F1	NP_005645.1	-6.39	23	21	2	0	0	-74.2087	-1.76529	1.05551	0	TRUE	TRUE	TRUE	FALSE	FALSE	FALSE	TRUE	TRUE	TRUE	TRUE
X	PHF6	NP_115834.1	-6.368	4	2	1	1	0	-9.7445	-0.678824	0.307317	3.4716e-09	TRUE	TRUE	TRUE	FALSE	FALSE	FALSE	TRUE	TRUE	FALSE	TRUE
X	KLHL15	NP_085127.2	-6.353	2	2	0	0	0	-6.684	-1.08667	0.563166	1.99767e-05	FALSE	TRUE	TRUE	FALSE	FALSE	FALSE	TRUE	FALSE	FALSE	TRUE
20	KCNQ2	NP_742105.1	-6.328	61	31	10	18	2	-147.018	-2.57808	2.17125	0	TRUE	TRUE	TRUE	FALSE	FALSE	FALSE	TRUE	TRUE	TRUE	TRUE
4	NSD2	NP_579877.1	-6.321	7	3	1	3	0	-15.7538	-2.96886	2.07552	4.81864e-09	TRUE	TRUE	TRUE	FALSE	FALSE	FALSE	TRUE	TRUE	FALSE	TRUE
3	PIK3CA	NP_006209.2	-6.3155	11	3	2	6	0	-22.6718	-2.4871	1.32721	0	TRUE	TRUE	TRUE	FALSE	FALSE	FALSE	TRUE	TRUE	TRUE	TRUE
15	NR2F2	NP_066285.1	-6.3125	3	2	1	0	0	-9.39725	-1.55542	1.02745	1.77219e-06	TRUE	TRUE	TRUE	FALSE	FALSE	FALSE	TRUE	FALSE	FALSE	TRUE
3	DHX30	NP_619520.1	-6.3035	8	8	0	0	0	-26.902	-2.54727	1.66255	0	TRUE	TRUE	TRUE	FALSE	FALSE	FALSE	TRUE	FALSE	FALSE	TRUE
7	EZH2	NP_004447.2	-6.275	7	1	1	5	0	-13.1022	-1.80832	1.34938	1.21778e-08	TRUE	TRUE	TRUE	FALSE	FALSE	FALSE	TRUE	FALSE	FALSE	TRUE
12	SCN8A	NP_055006.1	-6.262	40	22	7	10	1	-98.9655	-6.17172	3.64967	0	TRUE	TRUE	TRUE	FALSE	FALSE	FALSE	TRUE	TRUE	TRUE	TRUE
15	RAB11A	NP_004654.1	-6.242	3	2	0	1	0	-9.11975	-0.603273	0.325358	9.19163e-09	TRUE	TRUE	TRUE	FALSE	FALSE	FALSE	TRUE	FALSE	FALSE	TRUE
7	UBE2H	NP_003335.1	-6.2305	1	1	0	0	0	-3.61075	-0.601697	0.266291	0.000597887	FALSE	TRUE	TRUE	FALSE	FALSE	FALSE	FALSE	FALSE	FALSE	FALSE
2	XPO1	NP_003391.1	-6.2095	7	4	0	3	0	-15.0562	-3.01011	1.59692	3.28699e-09	TRUE	TRUE	TRUE	FALSE	FALSE	FALSE	FALSE	FALSE	FALSE	FALSE
X	PDHA1	NP_000275.1	-6.196	11	6	4	1	0	-29.9098	-0.804579	0.375186	0	TRUE	TRUE	FALSE	TRUE	FALSE	FALSE	TRUE	TRUE	TRUE	TRUE
2	SCN1A	NP_001159435.1	-6.1825	31	8	9	12	2	-64.8132	-4.65289	3.34002	0	TRUE	TRUE	TRUE	FALSE	FALSE	FALSE	TRUE	TRUE	TRUE	TRUE
2	FBXO11	NP_001177203.1	-6.175	15	4	4	5	2	-28.7188	-1.86833	1.28485	0	TRUE	TRUE	TRUE	FALSE	FALSE	FALSE	TRUE	TRUE	TRUE	TRUE
15	UBE3A	NP_570853.1	-6.172	1	1	0	0	0	-3.55225	-1.6393	0.703218	0.00687312	FALSE	TRUE	TRUE	FALSE	FALSE	FALSE	TRUE	TRUE	FALSE	TRUE
8	PUF60	NP_510965.1	-6.169	6	4	1	0	1	-14.3945	-1.85765	1.13278	1.38884e-09	TRUE	TRUE	TRUE	FALSE	FALSE	FALSE	TRUE	TRUE	FALSE	TRUE
7	RALA	NP_005393.2	-6.1565	5	5	0	0	0	-15.7812	-0.617462	0.284449	0	TRUE	TRUE	TRUE	FALSE	FALSE	FALSE	TRUE	FALSE	FALSE	TRUE
15	CHD2	NP_001262.3	-6.1505	12	10	0	1	1	-34.342	-3.19009	2.10499	0	TRUE	TRUE	TRUE	FALSE	FALSE	FALSE	TRUE	TRUE	TRUE	TRUE
X	KDM5C	NP_004178.2	-6.144	9	6	2	0	1	-24.8152	-2.89484	1.55472	1.0752e-16	TRUE	TRUE	TRUE	FALSE	FALSE	FALSE	TRUE	TRUE	TRUE	TRUE
14	SRP54	NP_003127.1	-6.1185	4	3	0	1	0	-10.891	-0.760832	0.437253	2.42071e-09	TRUE	TRUE	TRUE	FALSE	FALSE	FALSE	TRUE	FALSE	FALSE	TRUE
21	DYRK1A	NP_001387.2	-6.1185	15	8	1	6	0	-37.2433	-1.35902	0.983108	0	TRUE	TRUE	TRUE	FALSE	FALSE	FALSE	TRUE	TRUE	TRUE	TRUE
X	OTUD5	NP_060072.1	-6.116	3	1	0	2	0	-6.56175	-1.16427	0.616345	3.16701e-05	FALSE	TRUE	TRUE	FALSE	FALSE	FALSE	FALSE	FALSE	FALSE	FALSE
1	AMIGO1	NP_065754.2	-6.1155	3	1	0	2	0	-5.67725	-1.23746	0.926108	0.000350251	FALSE	TRUE	TRUE	FALSE	FALSE	FALSE	FALSE	FALSE	FALSE	FALSE
5	PPP2CA	NP_002706.1	-6.089	5	4	0	1	0	-13.0397	-1.24701	0.54315	1.96477e-11	TRUE	TRUE	TRUE	FALSE	FALSE	FALSE	TRUE	TRUE	FALSE	TRUE
15	COPS2	NP_001137359.1	-6.0835	1	1	0	0	0	-3.46375	-1.22144	0.652057	0.00553338	FALSE	TRUE	TRUE	FALSE	FALSE	FALSE	FALSE	FALSE	FALSE	FALSE
4	PPP3CA	NP_000935.1	-6.0705	6	5	0	0	1	-16.1505	-0.971232	0.490314	5.71316e-16	TRUE	TRUE	TRUE	FALSE	FALSE	FALSE	TRUE	FALSE	FALSE	TRUE
14	NEDD8	NP_006147.1	-6.0575	3	3	0	0	0					FALSE	TRUE	FALSE	FALSE	TRUE	FALSE	FALSE	FALSE	FALSE	FALSE
17	KDM6B	NP_001073893.1	-6.049	8	4	1	1	2	-16.62	-3.18216	3.82976	6.66598e-08	TRUE	TRUE	FALSE	FALSE	FALSE	TRUE	TRUE	TRUE	FALSE	TRUE
2	NR4A2	NP_006177.1	-6.0455	5	4	1	0	0	-14.2752	-1.23046	0.855281	5.99354e-11	TRUE	TRUE	TRUE	FALSE	FALSE	FALSE	TRUE	TRUE	TRUE	TRUE
X	PAK3	NP_002569.1	-6.035	2	1	0	1	0	-3.67025	-0.52731	0.24509	0.000488261	FALSE	TRUE	FALSE	TRUE	FALSE	FALSE	TRUE	FALSE	FALSE	TRUE
X	EIF2S3	NP_001406.1	-6.0165	1	1	0	0	0	-3.39675	-1.04219	0.380944	0.00228746	FALSE	TRUE	TRUE	FALSE	FALSE	FALSE	TRUE	FALSE	FALSE	TRUE
19	ATP1A3	NP_689509.1	-6.0025	31	16	7	8	0	-77.4298	-3.74987	2.11861	0	TRUE	TRUE	TRUE	FALSE	FALSE	FALSE	TRUE	TRUE	TRUE	TRUE
2	KIF1A	NP_004312.2	-5.988	53	41	5	4	3	-134.234	-4.46441	4.37872	0	TRUE	TRUE	TRUE	FALSE	FALSE	FALSE	TRUE	TRUE	TRUE	TRUE
12	SYT1	NP_001129277.1	-5.969	12	4	3	5	0	-27.316	-0.900088	0.494174	0	TRUE	TRUE	TRUE	FALSE	FALSE	FALSE	TRUE	TRUE	TRUE	TRUE
19	SMARCA4	NP_001122317.1	-5.967	43	19	7	15	2	-92.8898	-5.67144	4.05008	0	TRUE	TRUE	TRUE	FALSE	FALSE	FALSE	TRUE	TRUE	TRUE	TRUE
X	EIF1AX	NP_001403.1	-5.967	1	1	0	0	0	-3.34725	-0.325099	0.10765	0.000174824	FALSE	TRUE	FALSE	FALSE	TRUE	FALSE	FALSE	FALSE	FALSE	FALSE
X	RBBP7	NP_001185648.1	-5.9665	1	1	0	0	0	-3.34675	-0.917065	0.400044	0.00243037	FALSE	TRUE	TRUE	FALSE	FALSE	FALSE	FALSE	FALSE	FALSE	FALSE
X	ZMYM3	NP_963893.1	-5.951	3	1	0	2	0	-6.73775	-2.4518	1.5135	0.000847322	FALSE	TRUE	TRUE	FALSE	FALSE	FALSE	FALSE	FALSE	FALSE	FALSE
4	FBXW7	NP_361014.1	-5.9335	12	8	3	1	0	-30.4385	-1.49513	0.827061	0	TRUE	TRUE	TRUE	FALSE	FALSE	FALSE	TRUE	TRUE	TRUE	TRUE
19	TRIM28	NP_005753.1	-5.932	1	1	0	0	0	-3.31225	-1.75719	1.9131	0.0545179	FALSE	TRUE	FALSE	FALSE	FALSE	TRUE	FALSE	FALSE	FALSE	FALSE
17	CHD3	NP_001005271.2	-5.927	45	25	2	16	2	-105.256	-5.18581	4.00075	0	TRUE	TRUE	TRUE	FALSE	FALSE	FALSE	TRUE	TRUE	TRUE	TRUE
5	CHD1	NP_001261.2	-5.9145	6	2	0	4	0	-10.5275	-2.46648	1.72523	5.85357e-06	FALSE	TRUE	TRUE	FALSE	FALSE	FALSE	TRUE	FALSE	FALSE	TRUE
X	WDR45	NP_009006.2	-5.9125	12	9	2	1	0	-31.9175	-0.603819	0.438032	0	TRUE	TRUE	TRUE	FALSE	FALSE	FALSE	TRUE	TRUE	TRUE	TRUE
17	SRSF1	NP_008855.1	-5.9055	4	4	0	0	0	-11.81	-1.64013	0.709637	5.49874e-09	TRUE	TRUE	TRUE	FALSE	FALSE	FALSE	TRUE	FALSE	FALSE	TRUE
14	FOXG1	NP_005240.3	-5.898	22	21	0	0	1	-63.3625	-1.76002	1.07639	0	TRUE	TRUE	TRUE	FALSE	FALSE	FALSE	TRUE	TRUE	TRUE	TRUE
5	KIF2A	NP_001091981.1	-5.893	5	2	0	3	0	-10.8972	-1.17528	0.753284	2.51442e-08	TRUE	TRUE	TRUE	FALSE	FALSE	FALSE	TRUE	FALSE	FALSE	TRUE
22	DDX17	NP_001091974.1	-5.891	2	1	0	1	0	-4.2285	-1.52477	0.821271	0.00331224	FALSE	TRUE	TRUE	FALSE	FALSE	FALSE	FALSE	FALSE	FALSE	FALSE
1	WDR26	NP_079436.4	-5.8855	5	3	0	2	0	-11.3708	-1.305	0.998072	2.46852e-08	TRUE	TRUE	TRUE	FALSE	FALSE	FALSE	TRUE	TRUE	FALSE	TRUE
X	HSD17B10	NP_004484.1	-5.8815	3	3	0	0	0	-9.31425	-0.89647	0.324024	3.45675e-08	TRUE	TRUE	TRUE	FALSE	FALSE	FALSE	TRUE	FALSE	FALSE	TRUE
2	SOX11	NP_003099.1	-5.8785	19	18	1	0	0	-55.4663	-1.3751	1.41674	0	TRUE	TRUE	TRUE	FALSE	FALSE	FALSE	TRUE	TRUE	TRUE	TRUE
7	BRAF	NP_004324.2	-5.872	34	9	10	15	0	-71.3185	-1.42221	1.05596	0	TRUE	TRUE	TRUE	FALSE	FALSE	FALSE	TRUE	TRUE	TRUE	TRUE
20	ADNP	NP_852107.1	-5.868	4	3	0	1	0	-10.2525	-1.73724	1.60346	1.79919e-06	TRUE	TRUE	TRUE	FALSE	FALSE	FALSE	TRUE	TRUE	FALSE	TRUE
9	SPIN1	NP_006708.2	-5.8635	1	1	0	0	0	-3.24375	-0.810275	0.448455	0.00304186	FALSE	TRUE	TRUE	FALSE	FALSE	FALSE	FALSE	FALSE	FALSE	FALSE
17	VAMP2	NP_055047.2	-5.8625	4	3	1	0	0	-11.4045	-0.285389	0.199277	1.26337e-12	TRUE	TRUE	TRUE	FALSE	FALSE	FALSE	TRUE	TRUE	TRUE	TRUE
14	WARS1	NP_004175.2	-5.8575	4	2	1	0	1	-8.4695	-0.970311	0.766283	9.04422e-07	TRUE	TRUE	TRUE	FALSE	FALSE	FALSE	FALSE	FALSE	FALSE	FALSE
X	PRPS1	NP_002755.1	-5.855	1	1	0	0	0	-3.23525	-0.890587	0.323395	0.00205365	FALSE	TRUE	TRUE	FALSE	FALSE	FALSE	TRUE	FALSE	FALSE	TRUE
2	MAT2A	NP_005902.1	-5.8545	1	1	0	0	0	-3.23475	-1.33639	0.654801	0.00810432	FALSE	TRUE	TRUE	FALSE	FALSE	FALSE	FALSE	FALSE	FALSE	FALSE
X	TSPAN7	NP_004606.2	-5.847	1	1	0	0	0	-3.22725	-0.380349	0.253728	0.00066877	FALSE	TRUE	TRUE	FALSE	FALSE	FALSE	TRUE	FALSE	FALSE	TRUE
5	KCNN2	NP_001359162.1	-5.8465	1	1	0	0	0	-4.27525	-1.47353	1.32348	0.00741686	FALSE	TRUE	TRUE	FALSE	FALSE	FALSE	FALSE	FALSE	FALSE	FALSE
17	SPOP	NP_001007227.1	-5.8315	6	2	2	2	0	-13.885	-1.09098	0.610295	8.82813e-12	TRUE	TRUE	TRUE	FALSE	FALSE	FALSE	TRUE	FALSE	FALSE	TRUE
20	ZMYND8	NP_001350643.1	-5.8215	6	3	0	3	0	-13.5015	-2.77191	2.49417	4.60455e-07	TRUE	TRUE	TRUE	FALSE	FALSE	FALSE	FALSE	FALSE	FALSE	FALSE
18	TCF4	NP_001077431.1	-5.818	21	9	2	8	2	-40.7283	-1.43538	1.09935	0	TRUE	TRUE	TRUE	FALSE	FALSE	FALSE	TRUE	TRUE	TRUE	TRUE
15	ACTC1	NP_005150.1	-5.8165	3	1	2	0	0	-7.25475	-1.61023	0.840039	4.09347e-05	FALSE	TRUE	TRUE	FALSE	FALSE	FALSE	FALSE	FALSE	FALSE	FALSE
19	NFIX	NP_002492.2	-5.811	10	6	1	2	1	-22.846	-1.5899	1.05238	0	TRUE	TRUE	TRUE	FALSE	FALSE	FALSE	TRUE	TRUE	TRUE	TRUE
11	DDX6	NP_004388.2	-5.805	4	3	0	1	0	-10.1005	-1.29059	0.652331	8.09253e-08	TRUE	TRUE	TRUE	FALSE	FALSE	FALSE	TRUE	FALSE	FALSE	TRUE
2	SATB2	NP_056080.1	-5.805	35	22	10	2	1	-85.3008	-2.40114	1.53896	0	TRUE	TRUE	TRUE	FALSE	FALSE	FALSE	TRUE	TRUE	TRUE	TRUE
17	SMARCE1	NP_003070.3	-5.8045	3	2	1	0	0	-8.13025	-0.947646	0.750826	1.39111e-06	TRUE	TRUE	TRUE	FALSE	FALSE	FALSE	TRUE	FALSE	FALSE	TRUE
6	TFAP2A	NP_001358995.1	-5.804	4	1	3	0	0	-9.588	-1.03409	1.11044	1.99327e-07	TRUE	TRUE	TRUE	FALSE	FALSE	FALSE	TRUE	FALSE	FALSE	TRUE
7	PSMA2	NP_002778.1	-5.8	1	1	0	0	0	-3.18025	-0.658139	0.357007	0.00202216	FALSE	TRUE	TRUE	FALSE	FALSE	FALSE	FALSE	FALSE	FALSE	FALSE
17	MAP2K4	NP_001268364.1	-5.797	2	1	0	1	0	-5.2415	-0.773366	0.443825	8.17777e-05	FALSE	TRUE	TRUE	FALSE	FALSE	FALSE	FALSE	FALSE	FALSE	FALSE
22	ZBED4	NP_055653.2	-5.789	2	1	0	1	0	-4.7795	-2.2421	2.6774	0.0280334	FALSE	TRUE	TRUE	FALSE	FALSE	FALSE	FALSE	FALSE	FALSE	FALSE
17	TLK2	NP_006843.2	-5.788	10	8	1	1	0	-26.8915	-1.98198	0.97586	0	TRUE	TRUE	TRUE	FALSE	FALSE	FALSE	TRUE	TRUE	TRUE	TRUE
9	HNRNPK	NP_002131.2	-5.7805	5	4	1	0	0	-13.6017	-1.49219	0.845246	3.60988e-10	TRUE	TRUE	TRUE	FALSE	FALSE	FALSE	TRUE	TRUE	FALSE	TRUE
X	ZDHHC9	NP_057116.2	-5.778	1	1	0	0	0	-3.15825	-0.711836	0.344787	0.00241344	FALSE	TRUE	TRUE	FALSE	FALSE	FALSE	TRUE	FALSE	FALSE	TRUE
12	ATP2A2	NP_001672.1	-5.7755	6	1	0	4	1	-9.05	-2.78701	1.72446	6.937e-05	FALSE	TRUE	TRUE	FALSE	FALSE	FALSE	FALSE	FALSE	FALSE	TRUE
X	BRWD3	NP_694984.5	-5.7735	3	1	0	2	0	-6.10275	-2.50776	1.69613	0.00295466	FALSE	TRUE	TRUE	FALSE	FALSE	FALSE	TRUE	FALSE	FALSE	TRUE
10	NFKB2	NP_001309863.1	-5.7695	3	2	0	0	1	-6.62225	-2.42903	2.06416	0.00231141	FALSE	TRUE	TRUE	FALSE	FALSE	FALSE	FALSE	FALSE	FALSE	FALSE
14	CALM1	NP_001350599.1	-5.769	2	2	0	0	0	-6.0005	-0.742481	0.270848	8.31123e-06	FALSE	TRUE	TRUE	FALSE	FALSE	FALSE	FALSE	FALSE	FALSE	FALSE
8	EGR3	NP_004421.2	-5.769	5	4	0	0	1	-12.6012	-1.61911	0.91318	8.83651e-09	TRUE	TRUE	TRUE	FALSE	FALSE	FALSE	FALSE	FALSE	FALSE	FALSE
2	EIF5B	NP_056988.3	-5.7585	3	1	0	1	1	-5.62125	-2.15725	1.63788	0.00373056	FALSE	TRUE	TRUE	FALSE	FALSE	FALSE	FALSE	FALSE	FALSE	FALSE
13	CDK8	NP_001251.1	-5.754	7	5	0	2	0	-18.0167	-0.898687	0.546611	0	TRUE	TRUE	TRUE	FALSE	FALSE	FALSE	TRUE	TRUE	TRUE	TRUE
14	DCAF5	NP_003852.1	-5.747	1	1	0	0	0	-3.12725	-1.96518	1.59583	0.063341	FALSE	TRUE	TRUE	FALSE	FALSE	FALSE	FALSE	FALSE	FALSE	FALSE
15	GABRB3	NP_068712.1	-5.7355	10	3	2	5	0	-22.506	-1.20457	0.729544	0	TRUE	TRUE	TRUE	FALSE	FALSE	FALSE	TRUE	TRUE	TRUE	TRUE
X	BTK	NP_000052.1	-5.731	4	2	1	1	0	-9.626	-1.01826	0.429697	2.83902e-08	TRUE	TRUE	TRUE	FALSE	FALSE	FALSE	FALSE	FALSE	FALSE	FALSE
6	HDAC2	NP_001518.3	-5.726	5	4	0	1	0	-13.3173	-1.11243	0.524877	5.26461e-12	TRUE	TRUE	TRUE	FALSE	FALSE	FALSE	FALSE	FALSE	FALSE	FALSE
20	CSNK2A1	NP_001349700.1	-5.7255	26	8	6	12	0	-63.1968	-1.15152	0.72836	0	TRUE	TRUE	TRUE	FALSE	FALSE	FALSE	TRUE	TRUE	TRUE	TRUE
5	GABRA1	NP_000797.2	-5.725	14	3	6	4	1	-27.241	-1.24522	0.711942	0	TRUE	TRUE	TRUE	FALSE	FALSE	FALSE	TRUE	TRUE	TRUE	TRUE
12	ARF3	NP_001650.1	-5.7195	2	2	0	0	0	-6.6055	-0.649294	0.380044	3.56433e-06	FALSE	TRUE	TRUE	FALSE	FALSE	FALSE	FALSE	FALSE	FALSE	FALSE
11	KMT5B	NP_001356355.1	-5.719	4	3	1	0	0	-13.0713	-1.99233	1.52989	3.58839e-08	TRUE	TRUE	TRUE	FALSE	FALSE	FALSE	TRUE	TRUE	FALSE	TRUE
17	EIF4A3	NP_055555.1	-5.7135	2	1	0	1	0	-4.333	-1.32546	0.80093	0.0024807	FALSE	TRUE	TRUE	FALSE	FALSE	FALSE	TRUE	FALSE	FALSE	TRUE
12	SETD1B	NP_001340274.1	-5.7085	11	2	0	5	4	-13.0488	-4.01088	5.04678	6.99716e-05	FALSE	TRUE	TRUE	FALSE	FALSE	FALSE	TRUE	FALSE	FALSE	TRUE
17	EIF5A	NP_001137232.1	-5.7075	5	4	0	1	0	-3.08775	-0.043678	0.0176136	1.07946e-05	FALSE	TRUE	TRUE	FALSE	FALSE	FALSE	TRUE	FALSE	FALSE	TRUE
8	AGO2	NP_036286.2	-5.703	5	2	1	2	0	-10.9183	-2.68678	2.11977	1.01355e-05	FALSE	TRUE	TRUE	FALSE	FALSE	FALSE	FALSE	FALSE	FALSE	TRUE
1	SLC2A1	NP_006507.2	-5.6975	12	5	5	2	0	-28.0205	-1.38451	1.13101	0	TRUE	TRUE	TRUE	FALSE	FALSE	FALSE	TRUE	TRUE	TRUE	TRUE
X	PCDH19	NP_001171809.1	-5.6955	4	2	2	0	0	-10.4395	-1.61544	1.1697	3.97559e-07	TRUE	TRUE	TRUE	FALSE	FALSE	FALSE	TRUE	TRUE	FALSE	TRUE
X	NAA10	NP_003482.1	-5.691	21	21	0	0	0	-55.9902	-0.451837	0.186554	0	TRUE	TRUE	TRUE	FALSE	FALSE	FALSE	TRUE	TRUE	TRUE	TRUE
X	CASK	NP_003679.2	-5.686	15	6	4	5	0	-33.3772	-1.67409	0.938727	0	TRUE	TRUE	FALSE	TRUE	FALSE	FALSE	TRUE	TRUE	TRUE	TRUE
11	DPF2	NP_006259.1	-5.686	9	3	3	2	1	-18.7488	-1.00428	0.81389	0	TRUE	TRUE	TRUE	FALSE	FALSE	FALSE	TRUE	TRUE	TRUE	TRUE
9	GRIN1	NP_015566.1	-5.6815	36	14	11	11	0	-81.9805	-3.73483	2.38271	0	TRUE	TRUE	TRUE	FALSE	FALSE	FALSE	TRUE	TRUE	TRUE	TRUE
14	BCL11B	NP_612808.1	-5.6775	10	6	1	2	1	-21.1715	-2.66086	2.5332	7.14055e-13	TRUE	TRUE	TRUE	FALSE	FALSE	FALSE	TRUE	TRUE	TRUE	TRUE
12	RAN	NP_006316.1	-5.6705	1	1	0	0	0	-3.05075	-0.827584	0.297696	0.00233078	FALSE	TRUE	TRUE	FALSE	FALSE	FALSE	FALSE	FALSE	FALSE	FALSE
X	TAF1	NP_001273003.2	-5.669	14	3	3	8	0	-28.708	-3.60993	2.00018	0	TRUE	TRUE	TRUE	FALSE	FALSE	FALSE	TRUE	TRUE	TRUE	TRUE
15	MEIS2	NP_733774.1	-5.6615	7	3	3	1	0	-15.8727	-0.995559	0.764954	5.45326e-13	TRUE	TRUE	TRUE	FALSE	FALSE	FALSE	TRUE	TRUE	FALSE	TRUE
17	NEUROD2	NP_006151.3	-5.66	1	1	0	0	0	-3.04025	-1.49967	1.06903	0.0284506	FALSE	TRUE	TRUE	FALSE	FALSE	FALSE	FALSE	FALSE	FALSE	FALSE
12	ATP2B1	NP_001673.2	-5.66	4	1	1	2	0	-8.027	-1.94602	1.15312	4.00789e-05	FALSE	TRUE	TRUE	FALSE	FALSE	FALSE	TRUE	FALSE	FALSE	TRUE
2	TRIP12	NP_004229.1	-5.657	8	2	1	5	0	-14.085	-4.14225	3.33431	4.43361e-06	FALSE	TRUE	TRUE	FALSE	FALSE	FALSE	TRUE	TRUE	FALSE	TRUE
2	STAT1	NP_009330.1	-5.644	5	1	0	4	0	-9.28875	-2.09327	1.20148	7.25582e-06	FALSE	TRUE	TRUE	FALSE	FALSE	FALSE	FALSE	FALSE	FALSE	TRUE
16	STX1B	NP_443106.1	-5.64	5	1	1	3	0	-8.13875	-0.896515	0.682171	9.59926e-07	TRUE	TRUE	TRUE	FALSE	FALSE	FALSE	TRUE	FALSE	FALSE	TRUE
X	SMC1A	NP_006297.2	-5.637	18	4	7	7	0	-39.7685	-2.88093	1.37918	0	TRUE	TRUE	TRUE	FALSE	FALSE	FALSE	TRUE	TRUE	TRUE	TRUE
16	CTCF	NP_006556.1	-5.633	19	16	0	3	0	-49.2428	-2.22583	1.27133	0	TRUE	TRUE	TRUE	FALSE	FALSE	FALSE	TRUE	TRUE	TRUE	TRUE
X	RNF113A	NP_008909.1	-5.628	1	1	0	0	0	-3.00825	-0.730937	0.463304	0.00472129	FALSE	TRUE	TRUE	FALSE	FALSE	FALSE	TRUE	FALSE	FALSE	TRUE
1	GNB1	NP_002065.1	-5.6185	3	2	0	1	0	-6.93275	-0.806227	0.522222	4.57272e-06	FALSE	TRUE	TRUE	FALSE	FALSE	FALSE	TRUE	TRUE	TRUE	TRUE
11	SF1	NP_001171501.1	-5.617	4	2	1	0	1	-8.008	-1.27653	1.10965	1.23598e-05	FALSE	TRUE	TRUE	FALSE	FALSE	FALSE	FALSE	FALSE	FALSE	FALSE
12	PTPN11	NP_002825.3	-5.6165	41	5	6	27	3	-68.2387	-0.790169	0.650493	0	TRUE	TRUE	TRUE	FALSE	FALSE	FALSE	TRUE	TRUE	TRUE	TRUE
2	ZEB2	NP_055610.1	-5.6155	4	2	0	2	0	-8.6765	-2.76017	1.95486	0.000179953	FALSE	TRUE	TRUE	FALSE	FALSE	FALSE	TRUE	TRUE	FALSE	TRUE
12	CBX5	NP_036249.1	-5.6075	4	2	1	1	0	-9.047	-0.457432	0.266131	6.76583e-09	TRUE	TRUE	TRUE	FALSE	FALSE	FALSE	FALSE	FALSE	FALSE	FALSE
X	RPGR	NP_001030025.1	-5.6065	1	1	0	0	0	-2.98675	-0.897421	0.686464	0.00938698	FALSE	TRUE	TRUE	FALSE	FALSE	FALSE	FALSE	FALSE	FALSE	FALSE
1	DHX9	NP_001348.2	-5.599	3	2	0	0	1	-6.60975	-2.19015	1.40997	0.000698877	FALSE	TRUE	TRUE	FALSE	FALSE	FALSE	FALSE	FALSE	FALSE	FALSE
9	LHX6	NP_055183.2	-5.5905	1	1	0	0	0	-2.97075	-1.0135	0.776255	0.0130399	FALSE	TRUE	TRUE	FALSE	FALSE	FALSE	FALSE	FALSE	FALSE	FALSE
20	KCNB1	NP_004966.1	-5.5895	26	21	4	1	0	-68.513	-2.40799	1.26008	0	TRUE	TRUE	TRUE	FALSE	FALSE	FALSE	TRUE	TRUE	TRUE	TRUE
X	CDKL5	NP_003150.1	-5.5835	8	6	2	0	0	-21.419	-1.41541	0.838359	0	TRUE	TRUE	TRUE	FALSE	FALSE	FALSE	TRUE	TRUE	TRUE	TRUE
1	H3-3A	NP_002098.1	-5.583	14	7	4	3	0	-32.1445	-0.795769	0.366474	0	TRUE	TRUE	TRUE	FALSE	FALSE	FALSE	TRUE	TRUE	TRUE	TRUE
5	GABRB2	NP_068711.1	-5.577	18	7	8	3	0	-41.572	-1.05742	0.596196	0	TRUE	TRUE	TRUE	FALSE	FALSE	FALSE	TRUE	TRUE	TRUE	TRUE
19	CACNA1A	NP_001120693.1	-5.5695	32	16	5	11	0	-69.1095	-3.55885	3.218	0	TRUE	TRUE	TRUE	FALSE	FALSE	FALSE	TRUE	TRUE	TRUE	TRUE
X	GRIA3	NP_015564.5	-5.5685	3	2	0	1	0	-7.28975	-1.65956	0.931523	4.72751e-05	FALSE	TRUE	TRUE	FALSE	FALSE	FALSE	TRUE	FALSE	FALSE	TRUE
6	PHIP	NP_060404.4	-5.5665	12	1	1	10	0	-21.9305	-4.24861	2.99172	3.20363e-11	TRUE	TRUE	TRUE	FALSE	FALSE	FALSE	TRUE	TRUE	TRUE	TRUE
15	ARIH1	NP_005735.2	-5.566	4	1	2	1	0	-8.4875	-1.74705	0.923002	6.58346e-06	FALSE	TRUE	TRUE	FALSE	FALSE	FALSE	FALSE	FALSE	FALSE	FALSE
12	SMARCC2	NP_003066.2	-5.5655	5	1	0	4	0	-8.99275	-2.52508	1.94621	9.5075e-05	FALSE	TRUE	TRUE	FALSE	FALSE	FALSE	TRUE	FALSE	FALSE	TRUE
2	SF3B1	NP_036565.2	-5.553	5	3	2	0	0	-12.9992	-3.66626	1.68549	2.19344e-07	TRUE	TRUE	TRUE	FALSE	FALSE	FALSE	FALSE	FALSE	FALSE	FALSE
14	PABPN1	NP_004634.1	-5.552	2	1	0	0	1					FALSE	TRUE	TRUE	FALSE	FALSE	FALSE	FALSE	FALSE	FALSE	FALSE
9	RFX3	NP_602304.1	-5.5465	5	2	1	1	1	-9.54225	-1.55822	1.19223	2.18483e-06	TRUE	TRUE	TRUE	FALSE	FALSE	FALSE	FALSE	FALSE	FALSE	FALSE
9	HSPA5	NP_005338.1	-5.546	1	1	0	0	0	-3.55925	-1.83188	1.20231	0.0208112	FALSE	TRUE	TRUE	FALSE	FALSE	FALSE	FALSE	FALSE	FALSE	FALSE
21	CCT8	NP_006576.2	-5.5445	1	1	0	0	0	-2.92475	-0.629217	0.830073	0.00704487	FALSE	TRUE	TRUE	FALSE	FALSE	FALSE	FALSE	FALSE	FALSE	FALSE
17	PAFAH1B1	NP_000421.1	-5.5425	3	2	0	1	0	-7.59725	-0.634493	0.438413	6.39863e-07	TRUE	TRUE	TRUE	FALSE	FALSE	FALSE	TRUE	FALSE	FALSE	TRUE
8	KCNK9	NP_001269463.1	-5.5415	3	2	0	1	0	-7.40175	-0.977326	0.760481	6.8022e-06	FALSE	TRUE	TRUE	FALSE	FALSE	FALSE	TRUE	FALSE	FALSE	TRUE
2	KIF5C	NP_004513.1	-5.5415	7	3	4	0	0	-17.2028	-1.64369	1.31592	2.05459e-12	TRUE	TRUE	TRUE	FALSE	FALSE	FALSE	TRUE	TRUE	TRUE	TRUE
2	COL3A1	NP_000081.2	-5.5355	7	4	1	2	0	-14.9628	-2.99965	2.35011	6.28127e-08	TRUE	TRUE	TRUE	FALSE	FALSE	FALSE	FALSE	FALSE	FALSE	FALSE
5	MACROH2A1	NP_613258.2	-5.5275	1	1	0	0	0	-2.90775	-1.14414	0.736807	0.0159933	FALSE	TRUE	TRUE	FALSE	FALSE	FALSE	FALSE	FALSE	FALSE	FALSE
9	RAB14	NP_057406.2	-5.5245	7	7	0	0	0	-19.0808	-0.569158	0.286874	0	TRUE	TRUE	TRUE	FALSE	FALSE	FALSE	TRUE	TRUE	TRUE	TRUE
7	YWHAG	NP_036611.2	-5.5215	6	3	2	1	0	-14.6505	-0.831472	0.641008	1.83051e-12	TRUE	TRUE	TRUE	FALSE	FALSE	FALSE	TRUE	FALSE	FALSE	TRUE
7	STX1A	NP_004594.1	-5.52	2	1	0	1	0	-3.868	-0.68088	0.719889	0.00140134	FALSE	TRUE	TRUE	FALSE	FALSE	FALSE	FALSE	FALSE	FALSE	FALSE
10	EBF3	NP_001005463.1	-5.5185	17	1	4	11	1	-29.3272	-1.49803	1.4398	0	TRUE	TRUE	TRUE	FALSE	FALSE	FALSE	TRUE	TRUE	TRUE	TRUE
2	MAP4K4	NP_663719.2	-5.5165	7	4	1	1	1	-16.1308	-2.71755	2.12637	3.09216e-09	TRUE	TRUE	TRUE	FALSE	FALSE	FALSE	FALSE	FALSE	FALSE	FALSE
X	SMS	NP_004586.2	-5.5155	2	1	0	1	0	-4.4045	-0.591118	0.36325	0.000202072	FALSE	TRUE	FALSE	TRUE	FALSE	FALSE	TRUE	FALSE	FALSE	TRUE
11	PRPF19	NP_055317.1	-5.514	3	2	0	0	1	-6.02025	-1.5828	1.00722	0.000394445	FALSE	TRUE	TRUE	FALSE	FALSE	FALSE	FALSE	FALSE	FALSE	FALSE
8	FGFR1	NP_075598.2	-5.5115	6	2	1	3	0	-11.721	-1.65597	1.2989	7.32899e-08	TRUE	TRUE	TRUE	FALSE	FALSE	FALSE	TRUE	FALSE	FALSE	TRUE
16	GRIN2A	NP_000824.1	-5.5105	17	5	2	8	2	-31.1418	-2.16242	1.88931	0	TRUE	TRUE	TRUE	FALSE	FALSE	FALSE	TRUE	TRUE	TRUE	TRUE
20	EEF1A2	NP_001949.1	-5.498	18	6	8	4	0	-41.0945	-2.3094	1.25143	0	TRUE	TRUE	TRUE	FALSE	FALSE	FALSE	TRUE	TRUE	TRUE	TRUE
3	ZBTB20	NP_001157814.1	-5.4945	10	5	4	1	0	-23.696	-2.20846	1.71101	0	TRUE	TRUE	TRUE	FALSE	FALSE	FALSE	TRUE	TRUE	TRUE	TRUE
X	HPRT1	NP_000185.1	-5.493	1	1	0	0	0	-2.87325	-0.313295	0.149988	0.00071579	FALSE	TRUE	FALSE	TRUE	FALSE	FALSE	TRUE	FALSE	FALSE	TRUE
X	NONO	NP_001138880.1	-5.4895	3	2	0	1	0	-7.53225	-1.1215	0.482805	2.70952e-06	TRUE	TRUE	TRUE	FALSE	FALSE	FALSE	TRUE	FALSE	FALSE	TRUE
10	TCF7L2	NP_001354872.1	-5.489	6	2	1	1	2	-8.83875	-1.08711	1.45096	2.33828e-06	TRUE	TRUE	TRUE	FALSE	FALSE	FALSE	TRUE	TRUE	FALSE	TRUE
3	ATP6V1A	NP_001681.2	-5.488	13	12	1	0	0	-34.3323	-2.08202	1.0331	0	TRUE	TRUE	TRUE	FALSE	FALSE	FALSE	TRUE	TRUE	TRUE	TRUE
X	FTSJ1	NP_036412.1	-5.475	2	2	0	0	0	-5.4595	-0.477633	0.241211	1.23699e-05	FALSE	TRUE	TRUE	FALSE	FALSE	FALSE	TRUE	FALSE	FALSE	TRUE
X	ARX	NP_620689.1	-5.472	1	1	0	0	0	-2.85225	-0.975139	0.697398	0.0131321	FALSE	TRUE	TRUE	FALSE	FALSE	FALSE	TRUE	FALSE	FALSE	TRUE
5	PRKAA1	NP_996790.3	-5.471	1	1	0	0	0	-2.85125	-0.79863	0.571355	0.00843622	FALSE	TRUE	TRUE	FALSE	FALSE	FALSE	FALSE	FALSE	FALSE	FALSE
4	ABCE1	NP_002931.2	-5.468	1	1	0	0	0	-3.13025	-1.4219	0.975459	0.0200195	FALSE	TRUE	TRUE	FALSE	FALSE	FALSE	FALSE	FALSE	FALSE	FALSE
2	POU3F3	NP_006227.1	-5.467	5	5	0	0	0	-13.4247	-1.48639	1.23923	2.36808e-09	TRUE	TRUE	TRUE	FALSE	FALSE	FALSE	TRUE	TRUE	FALSE	TRUE
7	GTF2I	NP_001157108.1	-5.4665	1	1	0	0	0	-2.94225	-3.78113	1.74614	0.116007	FALSE	TRUE	FALSE	TRUE	FALSE	FALSE	FALSE	FALSE	FALSE	FALSE
19	PPP2R1A	NP_055040.2	-5.466	17	3	4	10	0	-31.6442	-1.78106	1.28029	0	TRUE	TRUE	TRUE	FALSE	FALSE	FALSE	TRUE	TRUE	TRUE	TRUE
13	USP12	NP_872294.2	-5.4655	1	1	0	0	0	-3.71625	-0.551596	0.544976	0.00094845	FALSE	TRUE	TRUE	FALSE	FALSE	FALSE	FALSE	FALSE	FALSE	FALSE
22	CLDN5	NP_001124333.1	-5.465	3	1	1	0	1	-5.73825	-0.713137	0.698147	4.30902e-05	FALSE	TRUE	TRUE	FALSE	FALSE	FALSE	TRUE	FALSE	FALSE	TRUE
X	CLCN4	NP_001821.2	-5.461	9	7	0	2	0	-21.2248	-1.29734	0.776857	0	TRUE	TRUE	TRUE	FALSE	FALSE	FALSE	TRUE	TRUE	TRUE	TRUE
10	FGFR2	NP_000132.3	-5.46	10	5	4	1	0	-22.9065	-1.59899	1.2687	0	TRUE	TRUE	TRUE	FALSE	FALSE	FALSE	TRUE	TRUE	TRUE	TRUE
1	CDC42	NP_001782.1	-5.4465	4	2	1	1	0	-9.0625	-0.596269	0.274132	9.7613e-09	TRUE	TRUE	TRUE	FALSE	FALSE	FALSE	TRUE	FALSE	FALSE	TRUE
3	ARIH2	NP_001304263.1	-5.445	1	1	0	0	0	-2.82525	-1.02823	0.697494	0.0150052	FALSE	TRUE	TRUE	FALSE	FALSE	FALSE	FALSE	FALSE	FALSE	FALSE
1	PBX1	NP_002576.1	-5.4395	10	9	1	0	0	-25.8005	-1.281	0.688573	0	TRUE	TRUE	TRUE	FALSE	FALSE	FALSE	TRUE	TRUE	TRUE	TRUE
6	DLL1	NP_005609.3	-5.439	1	1	0	0	0	-2.81925	-1.18057	1.34709	0.0372376	FALSE	TRUE	TRUE	FALSE	FALSE	FALSE	TRUE	FALSE	FALSE	TRUE
X	CYBB	NP_000388.2	-5.4385	2	1	0	1	0	-4.28	-0.749642	0.467761	0.000490015	FALSE	TRUE	TRUE	FALSE	FALSE	FALSE	FALSE	FALSE	FALSE	FALSE
9	EHMT1	NP_079033.4	-5.4345	7	1	3	3	0	-14.9868	-2.22868	2.56445	8.12569e-09	TRUE	TRUE	TRUE	FALSE	FALSE	FALSE	TRUE	TRUE	FALSE	TRUE
10	CAMK2G	NP_001307827.1	-5.43	7	1	0	6	0	-10.3597	-1.33441	1.07445	1.98588e-07	TRUE	TRUE	TRUE	FALSE	FALSE	FALSE	TRUE	TRUE	TRUE	TRUE
2	KLF7	NP_001257872.1	-5.423	5	1	0	4	0	-8.83475	-0.553676	0.398766	1.94379e-08	TRUE	TRUE	TRUE	FALSE	FALSE	FALSE	TRUE	TRUE	TRUE	TRUE
7	RAC1	NP_061485.1	-5.423	8	4	3	1	0	-18.8095	-0.687486	0.324662	0	TRUE	TRUE	TRUE	FALSE	FALSE	FALSE	TRUE	TRUE	TRUE	TRUE
17	EFTUD2	NP_004238.3	-5.42	12	1	6	4	1	-23.304	-1.86469	1.63284	4.03961e-17	TRUE	TRUE	TRUE	FALSE	FALSE	FALSE	TRUE	TRUE	TRUE	TRUE
19	AP2S1	NP_004060.2	-5.4135	5	4	0	1	0	-12.5178	-0.624295	0.341974	1.00034e-11	TRUE	TRUE	TRUE	FALSE	FALSE	FALSE	TRUE	TRUE	TRUE	TRUE
20	PLCB1	NP_056007.1	-5.41	3	1	0	1	1	-4.38175	-1.90311	1.41513	0.0112089	FALSE	TRUE	TRUE	FALSE	FALSE	FALSE	TRUE	FALSE	FALSE	TRUE
19	KDM4B	NP_055830.1	-5.41	7	1	1	0	5	-6.60875	-2.39524	3.12859	0.0055721	FALSE	TRUE	TRUE	FALSE	FALSE	FALSE	TRUE	FALSE	FALSE	TRUE
21	PWP2	NP_005040.2	-5.4085	3	2	1	0	0	-7.72075	-4.97753	2.00866	0.000993728	FALSE	TRUE	FALSE	TRUE	FALSE	FALSE	FALSE	FALSE	FALSE	FALSE
16	UBE2I	NP_003336.1	-5.4025	2	1	1	0	0	-4.9735	-0.579389	0.266028	4.75359e-05	FALSE	TRUE	TRUE	FALSE	FALSE	FALSE	FALSE	FALSE	FALSE	FALSE
1	PRG4	NP_005798.3	-5.402	4	2	0	1	1	-9.078	-1.34324	2.22701	7.47966e-06	FALSE	TRUE	TRUE	FALSE	FALSE	FALSE	FALSE	FALSE	FALSE	FALSE
1	RPS8	NP_001003.1	-5.4	1	1	0	0	0	-2.78025	-0.501947	0.512347	0.00411721	FALSE	TRUE	TRUE	FALSE	FALSE	FALSE	FALSE	FALSE	FALSE	FALSE
6	MAP3K7	NP_663304.1	-5.3985	12	4	3	5	0	-24.6945	-1.022	0.747875	0	TRUE	TRUE	TRUE	FALSE	FALSE	FALSE	TRUE	TRUE	TRUE	TRUE
7	VSTM2A	NP_872352.2	-5.391	1	1	0	0	0	-3.48625	-0.37911	0.464101	0.000388325	FALSE	TRUE	TRUE	FALSE	FALSE	FALSE	FALSE	FALSE	FALSE	FALSE
6	KCNQ5	NP_001153605.1	-5.3905	5	2	0	2	1	-8.74025	-1.89413	1.29986	1.72949e-05	FALSE	TRUE	TRUE	FALSE	FALSE	FALSE	TRUE	FALSE	FALSE	TRUE
2	PSMD14	NP_005796.1	-5.3835	2	2	0	0	0	-5.215	-0.83041	0.470768	0.00010746	FALSE	TRUE	TRUE	FALSE	FALSE	FALSE	FALSE	FALSE	FALSE	FALSE
9	RORB	NP_001351952.1	-5.381	6	1	1	4	0	-10.4445	-1.13469	0.837317	4.661e-08	TRUE	TRUE	TRUE	FALSE	FALSE	FALSE	TRUE	FALSE	FALSE	TRUE
X	DCX	NP_835366.1	-5.379	1	1	0	0	0	-2.75925	-0.827224	0.401414	0.00668743	FALSE	TRUE	TRUE	FALSE	FALSE	FALSE	TRUE	FALSE	FALSE	TRUE
6	SYNGAP1	NP_006763.2	-5.378	8	2	3	3	0	-16.615	-2.87958	2.09595	1.8664e-09	TRUE	TRUE	TRUE	FALSE	FALSE	FALSE	TRUE	TRUE	FALSE	TRUE
3	GNAI2	NP_002061.1	-5.376	3	2	0	1	0	-6.95525	-1.2381	0.888252	4.25355e-05	FALSE	TRUE	TRUE	FALSE	FALSE	FALSE	FALSE	FALSE	FALSE	FALSE
5	KDM3B	NP_057688.3	-5.3755	7	2	1	3	1	-13.9917	-3.52166	2.66769	8.92651e-07	TRUE	TRUE	TRUE	FALSE	FALSE	FALSE	TRUE	FALSE	FALSE	TRUE
10	KIF5B	NP_004512.1	-5.3745	3	2	0	0	1	-5.71375	-1.37019	1.11855	0.000594485	FALSE	TRUE	TRUE	FALSE	FALSE	FALSE	FALSE	FALSE	FALSE	FALSE
4	G3BP2	NP_987101.1	-5.3715	5	1	0	1	3	-7.73725	-1.11733	0.926371	7.30199e-06	FALSE	TRUE	TRUE	FALSE	FALSE	FALSE	FALSE	FALSE	FALSE	FALSE
X	RPL10	NP_001243506.2	-5.3705	4	2	0	2	0	-7.6325	-0.436747	0.232175	7.8522e-08	TRUE	TRUE	TRUE	FALSE	FALSE	FALSE	TRUE	FALSE	FALSE	TRUE
7	ZNF777	NP_056509.2	-5.37	1	1	0	0	0	-2.75025	-1.95019	1.9003	0.120653	FALSE	TRUE	TRUE	FALSE	FALSE	FALSE	FALSE	FALSE	FALSE	FALSE
1	KCNA2	NP_004965.1	-5.369	8	7	1	0	0	-19.7825	-1.22921	0.728446	9.37276e-17	TRUE	TRUE	TRUE	FALSE	FALSE	FALSE	TRUE	TRUE	TRUE	TRUE
X	ZFX	NP_001317256.1	-5.3655	2	2	0	0	0	-5.284	-1.14068	0.633198	0.00026978	FALSE	TRUE	TRUE	FALSE	FALSE	FALSE	FALSE	FALSE	FALSE	FALSE
17	CLTC	NP_001275582.1	-5.3645	12	2	5	5	0	-21.158	-4.82	2.88689	9.32498e-11	TRUE	TRUE	TRUE	FALSE	FALSE	FALSE	TRUE	TRUE	TRUE	TRUE
10	SMC3	NP_005436.1	-5.363	12	3	5	4	0	-24.0265	-3.33378	1.86577	1.7495e-15	TRUE	TRUE	TRUE	FALSE	FALSE	FALSE	TRUE	FALSE	FALSE	TRUE
4	H2AZ1	NP_002097.1	-5.3615	1	1	0	0	0	-2.74175	-0.797984	0.297508	0.00391952	FALSE	TRUE	TRUE	FALSE	FALSE	FALSE	FALSE	FALSE	FALSE	FALSE
2	CLASP1	NP_056097.1	-5.361	6	1	0	3	2	-5.057	-2.11891	2.10463	0.0125605	FALSE	TRUE	TRUE	FALSE	FALSE	FALSE	FALSE	FALSE	FALSE	FALSE
10	PPP3CB	NP_001135825.1	-5.36	1	1	0	0	0	-2.74025	-0.871683	0.439698	0.00748562	FALSE	TRUE	TRUE	FALSE	FALSE	FALSE	FALSE	FALSE	FALSE	FALSE
6	SYNCRIP	NP_001153145.1	-5.3585	1	1	0	0	0	-2.73875	-0.846473	0.558785	0.0104943	FALSE	TRUE	TRUE	FALSE	FALSE	FALSE	TRUE	FALSE	FALSE	TRUE
X	OTC	NP_000522.3	-5.357	2	2	0	0	0	-5.4065	-0.41374	0.285029	8.1918e-06	FALSE	TRUE	TRUE	FALSE	FALSE	FALSE	TRUE	FALSE	FALSE	TRUE
9	DNM1	NP_004399.2	-5.3545	19	6	9	4	0	-43.4562	-2.55161	1.8972	0	TRUE	TRUE	TRUE	FALSE	FALSE	FALSE	TRUE	TRUE	TRUE	TRUE
10	PTEN	NP_001291646.4	-5.353	20	2	7	11	0	-39.983	-0.960975	0.642588	0	TRUE	TRUE	TRUE	FALSE	FALSE	FALSE	TRUE	TRUE	TRUE	TRUE
7	IKZF1	NP_006051.1	-5.3525	1	1	0	0	0	-2.73275	-1.58625	1.29521	0.0594885	FALSE	TRUE	TRUE	FALSE	FALSE	FALSE	FALSE	FALSE	FALSE	FALSE
X	C1GALT1C1	NP_001011551.1	-5.3415	1	1	0	0	0	-2.72175	-0.384168	0.271428	0.00200478	FALSE	TRUE	TRUE	FALSE	FALSE	FALSE	FALSE	FALSE	FALSE	FALSE
22	PRODH	NP_057419.5	-5.3395	2	1	1	0	0	-4.917	-3.6018	1.36262	0.00707104	FALSE	TRUE	FALSE	TRUE	FALSE	FALSE	FALSE	FALSE	FALSE	FALSE
10	KIF11	NP_004514.2	-5.337	3	1	0	1	1	-4.34175	-1.75703	1.21855	0.00767645	FALSE	TRUE	TRUE	FALSE	FALSE	FALSE	TRUE	TRUE	FALSE	TRUE
7	KCND2	NP_036413.1	-5.3345	1	1	0	0	0	-2.71475	-1.46901	1.02043	0.040555	FALSE	TRUE	TRUE	FALSE	FALSE	FALSE	FALSE	FALSE	FALSE	FALSE
7	INHBA	NP_002183.1	-5.331	3	1	0	1	1	-4.61175	-0.972101	0.806344	0.000980562	FALSE	TRUE	TRUE	FALSE	FALSE	FALSE	FALSE	FALSE	FALSE	FALSE
17	TAOK1	NP_065842.1	-5.3305	9	3	3	3	0	-19.2168	-2.60312	1.64232	1.15229e-12	TRUE	TRUE	TRUE	FALSE	FALSE	FALSE	TRUE	TRUE	FALSE	TRUE
11	KDM2A	NP_036440.1	-5.3275	2	1	0	1	0	-3.6175	-2.63145	1.76109	0.0553423	FALSE	TRUE	TRUE	FALSE	FALSE	FALSE	FALSE	FALSE	FALSE	FALSE
6	NRN1	NP_057672.1	-5.327	1	1	0	0	0	-2.70725	-0.349339	0.312242	0.00185509	FALSE	TRUE	TRUE	FALSE	FALSE	FALSE	FALSE	FALSE	FALSE	FALSE
14	SNW1	NP_036377.1	-5.3255	2	2	0	0	0	-5.6275	-1.22815	0.979947	0.000415206	FALSE	TRUE	TRUE	FALSE	FALSE	FALSE	FALSE	FALSE	FALSE	FALSE
6	DHX16	NP_003578.2	-5.3165	3	1	1	1	0	-7.65675	-1.72122	1.39905	8.30607e-05	FALSE	TRUE	TRUE	FALSE	FALSE	FALSE	TRUE	FALSE	FALSE	TRUE
17	UBTF	NP_055048.1	-5.3165	8	1	0	7	0	-14.9805	-2.43962	1.44934	1.52231e-09	TRUE	TRUE	TRUE	FALSE	FALSE	FALSE	TRUE	TRUE	TRUE	TRUE
3	SOX2	NP_003097.1	-5.3135	2	2	0	0	0	-5.26	-1.01779	0.753367	0.000329637	FALSE	TRUE	TRUE	FALSE	FALSE	FALSE	TRUE	FALSE	FALSE	TRUE
19	TNPO2	NP_001129668.1	-5.313	6	3	0	3	0	-12.1755	-3.02742	1.87275	1.20294e-06	TRUE	TRUE	TRUE	FALSE	FALSE	FALSE	TRUE	FALSE	FALSE	TRUE
X	IQSEC2	NP_001104595.1	-5.3095	15	3	8	4	0	-31.9552	-2.12375	1.31047	0	TRUE	TRUE	TRUE	FALSE	FALSE	FALSE	TRUE	TRUE	TRUE	TRUE
3	SEC61A1	NP_037468.1	-5.309	2	1	0	1	0	-3.6575	-1.20158	0.90697	0.00749992	FALSE	TRUE	TRUE	FALSE	FALSE	FALSE	TRUE	FALSE	FALSE	TRUE
X	SLC35A2	NP_001035963.1	-5.3075	7	1	1	4	1	-11.2553	-0.672783	0.405418	2.51886e-10	TRUE	TRUE	FALSE	TRUE	FALSE	FALSE	TRUE	TRUE	FALSE	TRUE
7	CAPZA2	NP_006127.1	-5.307	1	1	0	0	0	-2.68725	-0.542451	0.447209	0.00510546	FALSE	TRUE	TRUE	FALSE	FALSE	FALSE	FALSE	FALSE	FALSE	FALSE
18	SMAD2	NP_005892.1	-5.306	2	2	0	0	0	-5.125	-0.881907	0.576728	0.000195744	FALSE	TRUE	TRUE	FALSE	FALSE	FALSE	TRUE	FALSE	FALSE	TRUE
21	SIK1	NP_775490.2	-5.306	1	1	0	0	0	-2.68625	-4.62567	1.4628	0.106661	FALSE	TRUE	FALSE	TRUE	FALSE	FALSE	TRUE	FALSE	FALSE	TRUE
7	RHEB	NP_005605.1	-5.3045	2	2	0	0	0	-5.218	-0.582282	0.282879	2.48866e-05	FALSE	TRUE	TRUE	FALSE	FALSE	FALSE	FALSE	FALSE	FALSE	TRUE
3	MSL2	NP_060603.2	-5.3045	4	1	0	2	1	-5.401	-1.28982	1.02723	0.000716939	FALSE	TRUE	TRUE	FALSE	FALSE	FALSE	TRUE	TRUE	FALSE	TRUE
18	SPIRE1	NP_001122098.1	-5.3035	2	1	0	1	0	-3.5275	-1.04743	1.51505	0.0103607	FALSE	TRUE	TRUE	FALSE	FALSE	FALSE	FALSE	FALSE	FALSE	FALSE
2	ATF2	NP_001243019.1	-5.2995	5	2	2	1	0	-11.2293	-0.925831	0.706126	2.13834e-09	TRUE	TRUE	TRUE	FALSE	FALSE	FALSE	FALSE	FALSE	FALSE	FALSE
20	TAF4	NP_003176.2	-5.299	1	1	0	0	0	-2.67925	-1.54911	2.23485	0.109775	FALSE	TRUE	TRUE	FALSE	FALSE	FALSE	FALSE	FALSE	FALSE	FALSE
19	UPF1	NP_001284478.1	-5.299	11	5	1	5	0	-23.7278	-3.50731	2.25583	6.97085e-13	TRUE	TRUE	TRUE	FALSE	FALSE	FALSE	TRUE	TRUE	TRUE	TRUE
7	DNAJC2	NP_055192.1	-5.2975	1	1	0	0	0	-2.44725	-1.01331	0.963075	0.0369882	FALSE	TRUE	TRUE	FALSE	FALSE	FALSE	FALSE	FALSE	FALSE	FALSE
11	KCNA4	NP_002224.1	-5.2965	3	1	0	2	0	-4.94825	-0.96559	0.750336	0.000493015	FALSE	TRUE	TRUE	FALSE	FALSE	FALSE	TRUE	FALSE	FALSE	TRUE
12	TBC1D15	NP_073608.4	-5.2935	1	1	0	0	0	-2.67375	-0.732658	0.886986	0.0144971	FALSE	TRUE	TRUE	FALSE	FALSE	FALSE	FALSE	FALSE	FALSE	FALSE
12	TBX3	NP_005987.3	-5.291	2	1	0	0	1	-2.8755	-1.03734	1.52857	0.0310904	FALSE	TRUE	TRUE	FALSE	FALSE	FALSE	TRUE	FALSE	FALSE	TRUE
12	KRAS	NP_004976.2	-5.291	7	1	0	6	0	-13.4907	-0.411291	0.25575	1.36662e-13	TRUE	TRUE	TRUE	FALSE	FALSE	FALSE	TRUE	TRUE	TRUE	TRUE
4	NAA15	NP_476516.1	-5.2865	5	2	3	0	0	-11.8517	-1.5188	1.24814	2.70373e-08	TRUE	TRUE	TRUE	FALSE	FALSE	FALSE	TRUE	TRUE	FALSE	TRUE
17	COL1A1	NP_000079.2	-5.2855	8	2	1	2	3	-12.494	-4.0186	3.42053	3.59321e-05	FALSE	TRUE	TRUE	FALSE	FALSE	FALSE	TRUE	FALSE	FALSE	TRUE
3	CTNNB1	NP_001895.1	-5.284	2	1	1	0	0	-4.9025	-1.70023	1.24863	0.00378512	FALSE	TRUE	TRUE	FALSE	FALSE	FALSE	TRUE	TRUE	FALSE	TRUE
19	BRD4	NP_490597.1	-5.2835	6	1	0	3	2	-6.9985	-2.00106	2.00286	0.000761277	FALSE	TRUE	TRUE	FALSE	FALSE	FALSE	TRUE	FALSE	FALSE	TRUE
12	ARL1	NP_001168.1	-5.282	1	1	0	0	0	-2.66225	-0.390301	0.264227	0.00224148	FALSE	TRUE	TRUE	FALSE	FALSE	FALSE	FALSE	FALSE	FALSE	FALSE
12	COL2A1	NP_001835.3	-5.281	11	2	4	2	3	-17.8193	-3.29746	2.78639	3.14995e-09	TRUE	TRUE	TRUE	FALSE	FALSE	FALSE	TRUE	TRUE	FALSE	TRUE
3	ACTL6A	NP_004292.1	-5.2795	2	2	0	0	0	-5.3195	-0.903144	0.647745	0.000173516	FALSE	TRUE	TRUE	FALSE	FALSE	FALSE	FALSE	FALSE	FALSE	TRUE
2	CALM2	NP_001292555.1	-5.273	1	1	0	0	0	-2.65325	-0.280265	0.142136	0.000957029	FALSE	TRUE	TRUE	FALSE	FALSE	FALSE	FALSE	FALSE	FALSE	FALSE
1	KCND3	NP_004971.2	-5.2715	10	2	4	4	0	-20.981	-1.90913	1.23767	5.14254e-15	TRUE	TRUE	TRUE	FALSE	FALSE	FALSE	TRUE	TRUE	TRUE	TRUE
3	SETD5	NP_001073986.1	-5.2675	7	1	3	3	0	-12.8938	-2.41296	2.56289	2.6977e-07	TRUE	TRUE	TRUE	FALSE	FALSE	FALSE	TRUE	TRUE	TRUE	TRUE
17	MYH3	NP_002461.2	-5.263	10	1	0	3	6	-9.3955	-3.20252	3.64366	0.000800332	FALSE	TRUE	TRUE	FALSE	FALSE	FALSE	TRUE	FALSE	FALSE	TRUE
6	PPP2R5D	NP_006236.1	-5.26	43	3	3	37	0	-77.7062	-1.10534	0.896898	0	TRUE	TRUE	TRUE	FALSE	FALSE	FALSE	TRUE	TRUE	TRUE	TRUE
12	LHX5	NP_071758.1	-5.2565	1	1	0	0	0	-2.63675	-1.10234	0.928158	0.0301109	FALSE	TRUE	TRUE	FALSE	FALSE	FALSE	FALSE	FALSE	FALSE	FALSE
X	OPHN1	NP_002538.1	-5.2545	2	1	0	1	0	-3.7355	-0.963676	0.670072	0.00313885	FALSE	TRUE	TRUE	FALSE	FALSE	FALSE	TRUE	FALSE	FALSE	TRUE
9	GABBR2	NP_005449.5	-5.2535	8	1	0	5	2	-10.2185	-2.11248	1.75178	5.89307e-06	FALSE	TRUE	TRUE	FALSE	FALSE	FALSE	TRUE	FALSE	FALSE	TRUE
5	ZSWIM6	NP_065979.1	-5.2525	5	1	1	1	2	-6.71525	-2.14752	2.04652	0.00147772	FALSE	TRUE	TRUE	FALSE	FALSE	FALSE	TRUE	FALSE	FALSE	TRUE
16	PRKCB	NP_997700.1	-5.249	4	1	0	2	1	-5.333	-1.00895	0.739227	0.000283592	FALSE	TRUE	TRUE	FALSE	FALSE	FALSE	FALSE	FALSE	FALSE	FALSE
14	CDC42BPB	NP_006026.3	-5.2475	9	1	0	5	3	-8.34425	-3.60659	3.8148	0.0044383	FALSE	TRUE	TRUE	FALSE	FALSE	FALSE	TRUE	FALSE	FALSE	TRUE
2	PPP3R1	NP_000936.1	-5.2465	1	1	0	0	0	-2.62675	-0.45614	0.224436	0.00254553	FALSE	TRUE	TRUE	FALSE	FALSE	FALSE	FALSE	FALSE	FALSE	FALSE
9	TUBB4B	NP_006079.1	-5.246	4	1	1	2	0	-7.5565	-2.15256	1.14746	7.91532e-05	FALSE	TRUE	FALSE	FALSE	FALSE	TRUE	FALSE	FALSE	FALSE	FALSE
11	SLC1A2	NP_004162.2	-5.245	1	1	0	0	0	-2.62525	-0.671298	0.591316	0.0101731	FALSE	TRUE	TRUE	FALSE	FALSE	FALSE	TRUE	FALSE	FALSE	TRUE
19	CNOT3	NP_055331.1	-5.2435	16	3	2	7	4	-21.079	-1.90049	1.70067	1.82694e-14	TRUE	TRUE	TRUE	FALSE	FALSE	FALSE	TRUE	TRUE	TRUE	TRUE
X	GSPT2	NP_060564.2	-5.2435	1	1	0	0	0	-2.62375	-0.716146	0.407602	0.00762569	FALSE	TRUE	TRUE	FALSE	FALSE	FALSE	TRUE	FALSE	FALSE	TRUE
19	CARM1	NP_954592.1	-5.2425	1	1	0	0	0	-2.62275	-1.30434	0.762111	0.0281072	FALSE	TRUE	TRUE	FALSE	FALSE	FALSE	FALSE	FALSE	FALSE	FALSE
17	DDX42	NP_031398.2	-5.2405	3	1	0	2	0	-5.28375	-1.23158	0.900066	0.000625891	FALSE	TRUE	TRUE	FALSE	FALSE	FALSE	FALSE	FALSE	FALSE	FALSE
7	CUX1	NP_001189472.1	-5.239	5	1	0	2	2	-6.26325	-2.90416	3.62338	0.018154	FALSE	TRUE	TRUE	FALSE	FALSE	FALSE	TRUE	FALSE	FALSE	TRUE
12	KCNA1	NP_000208.2	-5.238	4	1	1	1	1	-6.9525	-1.36515	1.04115	7.2282e-05	FALSE	TRUE	TRUE	FALSE	FALSE	FALSE	TRUE	FALSE	FALSE	TRUE
7	GNAI1	NP_002060.4	-5.2355	13	1	5	7	0	-26.4422	-0.635572	0.642931	0	TRUE	TRUE	TRUE	FALSE	FALSE	FALSE	TRUE	TRUE	TRUE	TRUE
1	RNF19B	NP_699172.2	-5.234	1	1	0	0	0	-2.61425	-1.21243	1.62077	0.0632848	FALSE	TRUE	TRUE	FALSE	FALSE	FALSE	FALSE	FALSE	FALSE	FALSE
19	SLC17A7	NP_064705.1	-5.2335	2	1	0	1	0	-4.192	-1.39455	1.15596	0.00649909	FALSE	TRUE	TRUE	FALSE	FALSE	FALSE	FALSE	FALSE	FALSE	FALSE
19	PTPRS	NP_002841.3	-5.232	10	1	0	3	6	-7.8245	-4.03225	5.65302	0.0234619	FALSE	TRUE	FALSE	FALSE	FALSE	TRUE	FALSE	FALSE	FALSE	FALSE
14	ATL1	NP_056999.2	-5.231	6	1	0	5	0	-9.388	-1.01401	0.783114	1.60862e-07	TRUE	TRUE	TRUE	FALSE	FALSE	FALSE	FALSE	FALSE	FALSE	TRUE
3	TP63	NP_003713.3	-5.23	2	1	0	1	0	-4.292	-1.18801	1.04914	0.00354358	FALSE	TRUE	TRUE	FALSE	FALSE	FALSE	TRUE	FALSE	FALSE	TRUE
X	THOC2	NP_001075019.1	-5.2275	5	3	1	1	0	-11.6002	-2.72461	1.3069	3.64447e-07	TRUE	TRUE	TRUE	FALSE	FALSE	FALSE	TRUE	FALSE	FALSE	TRUE
6	QKI	NP_006766.1	-5.2275	2	1	0	1	0	-4.554	-0.754639	0.471916	0.000291309	FALSE	TRUE	TRUE	FALSE	FALSE	FALSE	TRUE	FALSE	FALSE	TRUE
10	YME1L1	NP_647473.1	-5.225	1	1	0	0	0	-2.60525	-1.18994	0.920662	0.0337023	FALSE	TRUE	TRUE	FALSE	FALSE	FALSE	FALSE	FALSE	FALSE	FALSE
19	UBA2	NP_005490.1	-5.2245	2	1	1	0	0	-4.9305	-0.651649	0.880679	0.000219251	FALSE	TRUE	TRUE	FALSE	FALSE	FALSE	FALSE	FALSE	FALSE	FALSE
X	KDM6A	NP_066963.2	-5.2185	8	2	3	2	1	-14.697	-1.36972	1.01077	4.51216e-11	TRUE	TRUE	TRUE	FALSE	FALSE	FALSE	TRUE	TRUE	TRUE	TRUE
17	PSMC5	NP_002796.4	-5.212	8	4	4	0	0	-19.502	-1.01517	0.572688	0	TRUE	TRUE	TRUE	FALSE	FALSE	FALSE	TRUE	TRUE	TRUE	TRUE
6	PHACTR1	NP_112210.1	-5.212	3	2	0	1	0	-6.33175	-1.07664	0.854878	7.12372e-05	FALSE	TRUE	TRUE	FALSE	FALSE	FALSE	TRUE	FALSE	FALSE	TRUE
12	DNM1L	NP_036192.2	-5.207	11	1	0	10	0	-20.1423	-1.6448	1.21299	1.03289e-14	TRUE	TRUE	TRUE	FALSE	FALSE	FALSE	TRUE	TRUE	TRUE	TRUE
5	DDX46	NP_001287789.1	-5.2065	4	1	0	3	0	-6.672	-1.70519	0.96953	0.000145411	FALSE	TRUE	TRUE	FALSE	FALSE	FALSE	FALSE	FALSE	FALSE	FALSE
X	SLITRK4	NP_001171678.1	-5.2055	2	1	0	1	0	-4.134	-0.976397	0.742991	0.00195918	FALSE	TRUE	TRUE	FALSE	FALSE	FALSE	FALSE	FALSE	FALSE	FALSE
13	FBXL3	NP_036290.1	-5.202	1	1	0	0	0	-2.58225	-0.793692	0.716857	0.0160365	FALSE	TRUE	TRUE	FALSE	FALSE	FALSE	FALSE	FALSE	FALSE	FALSE
17	STAT3	NP_644805.1	-5.2015	5	1	1	3	0	-8.93025	-2.26884	1.33882	2.10373e-05	FALSE	TRUE	TRUE	FALSE	FALSE	FALSE	FALSE	FALSE	FALSE	FALSE
20	EIF6	NP_001254739.1	-5.197	1	1	0	0	0	-2.57725	-0.387804	0.461173	0.00333606	FALSE	TRUE	TRUE	FALSE	FALSE	FALSE	FALSE	FALSE	FALSE	FALSE
1	PIK3CD	NP_005017.3	-5.197	5	1	0	3	1	-6.40025	-2.35415	2.12383	0.00313595	FALSE	TRUE	TRUE	FALSE	FALSE	FALSE	FALSE	FALSE	FALSE	FALSE
2	SCN3A	NP_008853.3	-5.194	9	1	1	6	1	-17.2293	-3.65198	3.19831	2.19884e-08	TRUE	TRUE	TRUE	FALSE	FALSE	FALSE	TRUE	FALSE	FALSE	TRUE
1	SWT1	NP_001098988.1	-5.1835	1	1	0	0	0	-2.56375	-1.08785	1.23917	0.0432374	FALSE	TRUE	TRUE	FALSE	FALSE	FALSE	FALSE	FALSE	FALSE	FALSE
17	HDAC5	NP_001015053.1	-5.182	4	1	1	0	2	-6.0635	-2.30315	2.11384	0.00447468	FALSE	TRUE	TRUE	FALSE	FALSE	FALSE	FALSE	FALSE	FALSE	FALSE
7	CDK13	NP_003709.3	-5.181	35	3	28	3	1	-75.1737	-2.24616	2.68977	0	TRUE	TRUE	TRUE	FALSE	FALSE	FALSE	TRUE	TRUE	TRUE	TRUE
13	TRPC4	NP_057263.1	-5.1805	4	1	0	3	0	-6.484	-1.29211	1.24827	0.000153776	FALSE	TRUE	TRUE	FALSE	FALSE	FALSE	FALSE	FALSE	FALSE	FALSE
21	CBS	NP_000062.1	-5.1775	1	1	0	0	0	-2.55775	-2.01572	0.851047	0.0413082	FALSE	TRUE	FALSE	TRUE	FALSE	FALSE	TRUE	FALSE	FALSE	TRUE
2	TBR1	NP_006584.1	-5.176	2	1	0	1	0	-3.3845	-2.11719	1.67601	0.0562126	FALSE	TRUE	TRUE	FALSE	FALSE	FALSE	TRUE	FALSE	FALSE	TRUE
5	CSNK1A1	NP_001258671.1	-5.175	1	1	0	0	0	-2.55525	-1.0251	0.388688	0.00956111	FALSE	TRUE	TRUE	FALSE	FALSE	FALSE	FALSE	FALSE	FALSE	FALSE
6	SRSF3	NP_003008.1	-5.172	1	1	0	0	0	-2.55225	-0.57803	0.275265	0.00425657	FALSE	TRUE	TRUE	FALSE	FALSE	FALSE	FALSE	FALSE	FALSE	FALSE
2	SPAST	NP_055761.2	-5.172	9	3	4	2	0	-19.1252	-0.750803	0.635479	0	TRUE	TRUE	TRUE	FALSE	FALSE	FALSE	TRUE	TRUE	TRUE	TRUE
X	ACSL4	NP_004449.1	-5.171	2	2	0	0	0	-4.9885	-0.829623	0.496996	0.00017996	FALSE	TRUE	TRUE	FALSE	FALSE	FALSE	TRUE	FALSE	FALSE	TRUE
3	CACNA1D	NP_000711.1	-5.165	4	2	0	1	1	-7.019	-4.313	3.55489	0.0199948	FALSE	TRUE	TRUE	FALSE	FALSE	FALSE	TRUE	FALSE	FALSE	TRUE
12	SOX5	NP_008871.3	-5.1645	11	1	8	2	0	-23.9533	-1.52536	1.31641	0	TRUE	TRUE	TRUE	FALSE	FALSE	FALSE	TRUE	TRUE	TRUE	TRUE
6	TUBB2B	NP_821080.1	-5.1615	1	1	0	0	0	-2.54175	-3.15327	1.20187	0.0854478	FALSE	TRUE	TRUE	FALSE	FALSE	FALSE	TRUE	FALSE	FALSE	TRUE
20	PLCB4	NP_000924.3	-5.1605	4	1	2	1	0	-8.292	-2.04564	1.51602	6.64654e-05	FALSE	TRUE	TRUE	FALSE	FALSE	FALSE	TRUE	FALSE	FALSE	TRUE
11	WT1	NP_077744.4	-5.158	2	1	1	0	0	-4.8445	-1.19554	1.43792	0.00228063	FALSE	TRUE	TRUE	FALSE	FALSE	FALSE	TRUE	FALSE	FALSE	TRUE
X	GABRA3	NP_000799.1	-5.156	4	1	2	1	0	-9.106	-0.826936	0.43368	4.98012e-08	TRUE	TRUE	TRUE	FALSE	FALSE	FALSE	FALSE	FALSE	FALSE	TRUE
12	MSI1	NP_002433.1	-5.153	3	1	0	2	0	-5.84725	-0.833228	0.680008	5.53144e-05	FALSE	TRUE	TRUE	FALSE	FALSE	FALSE	TRUE	FALSE	FALSE	TRUE
X	FGD1	NP_004454.2	-5.15	1	1	0	0	0	-2.53025	-1.48577	0.993517	0.0517875	FALSE	TRUE	TRUE	FALSE	FALSE	FALSE	TRUE	FALSE	FALSE	TRUE
21	CRYAA	NP_000385.1	-5.1495	2	1	1	0	0	-4.558	-1.04514	0.459877	0.000451128	FALSE	TRUE	FALSE	TRUE	FALSE	FALSE	TRUE	FALSE	FALSE	TRUE
X	UPF3B	NP_542199.1	-5.1485	3	1	0	2	0	-5.44425	-0.683223	0.440285	4.39928e-05	FALSE	TRUE	TRUE	FALSE	FALSE	FALSE	TRUE	FALSE	FALSE	TRUE
8	PPP2R2A	NP_001171062.1	-5.1475	2	1	0	1	0	-3.4035	-1.09522	0.673842	0.00610383	FALSE	TRUE	TRUE	FALSE	FALSE	FALSE	FALSE	FALSE	FALSE	FALSE
12	HSP90B1	NP_003290.1	-5.1465	3	1	1	1	0	-6.21725	-1.28964	1.09677	0.000220031	FALSE	TRUE	TRUE	FALSE	FALSE	FALSE	FALSE	FALSE	FALSE	FALSE
3	ZIC1	NP_003403.2	-5.1445	2	1	0	1	0	-3.744	-1.2219	0.94297	0.00715776	FALSE	TRUE	TRUE	FALSE	FALSE	FALSE	TRUE	FALSE	FALSE	TRUE
X	ARHGEF9	NP_056000.1	-5.144	3	1	2	0	0	-7.29375	-0.858307	0.517157	3.07163e-06	FALSE	TRUE	TRUE	FALSE	FALSE	FALSE	TRUE	FALSE	FALSE	TRUE
17	DHX8	NP_004932.1	-5.143	2	1	0	1	0	-3.6	-1.87351	1.21395	0.0224859	FALSE	TRUE	TRUE	FALSE	FALSE	FALSE	FALSE	FALSE	FALSE	FALSE
1	ATP1A2	NP_000693.1	-5.143	14	1	3	7	3	-19.7273	-2.47385	1.93912	4.95564e-12	TRUE	TRUE	TRUE	FALSE	FALSE	FALSE	TRUE	FALSE	FALSE	TRUE
3	STAG1	NP_005853.2	-5.1375	8	1	5	2	0	-15.081	-2.17113	1.63293	1.46632e-09	TRUE	TRUE	TRUE	FALSE	FALSE	FALSE	TRUE	FALSE	FALSE	TRUE
2	MYT1L	NP_055840.2	-5.135	14	1	4	9	0	-21.3035	-3.17696	2.57416	2.66987e-12	TRUE	TRUE	TRUE	FALSE	FALSE	FALSE	TRUE	TRUE	TRUE	TRUE
8	GFUS	NP_001304712.1	-5.135	2	1	0	0	1	-2.6395	-0.335345	0.675072	0.00249726	FALSE	TRUE	TRUE	FALSE	FALSE	FALSE	FALSE	FALSE	FALSE	FALSE
3	ATP2B2	NP_001001331.1	-5.134	8	1	1	6	0	-13.891	-2.37399	1.85101	3.80252e-08	TRUE	TRUE	TRUE	FALSE	FALSE	FALSE	FALSE	FALSE	FALSE	TRUE
X	NKAP	NP_078804.2	-5.1335	2	1	0	1	0	-3.64	-0.511919	0.322758	0.000562067	FALSE	TRUE	TRUE	FALSE	FALSE	FALSE	TRUE	FALSE	FALSE	TRUE
15	RTF1	NP_055953.3	-5.13	2	1	1	0	0	-4.8425	-1.99068	1.25557	0.00504601	FALSE	TRUE	TRUE	FALSE	FALSE	FALSE	FALSE	FALSE	FALSE	FALSE
X	PORCN	NP_982301.1	-5.1275	2	1	0	1	0	-4.3775	-0.778463	0.543397	0.000519789	FALSE	TRUE	TRUE	FALSE	FALSE	FALSE	TRUE	FALSE	FALSE	TRUE
8	ESCO2	NP_001017420.1	-5.1245	1	1	0	0	0	-2.50475	-0.618735	0.848741	0.0118166	FALSE	TRUE	TRUE	FALSE	FALSE	FALSE	TRUE	FALSE	FALSE	TRUE
9	NFIB	NP_001177666.1	-5.1175	3	1	2	0	0	-6.85375	-0.903163	0.782013	1.36946e-05	FALSE	TRUE	TRUE	FALSE	FALSE	FALSE	TRUE	FALSE	FALSE	TRUE
9	VAV2	NP_001127870.1	-5.117	1	1	0	0	0	-3.81925	-1.11606	1.70357	0.0117054	FALSE	TRUE	TRUE	FALSE	FALSE	FALSE	FALSE	FALSE	FALSE	FALSE
13	ING1	NP_937861.1	-5.1135	2	1	0	1	0	-5.1295	-0.61729	0.621077	9.3121e-05	FALSE	TRUE	TRUE	FALSE	FALSE	FALSE	FALSE	FALSE	FALSE	FALSE
12	KIF5A	NP_004975.2	-5.1055	1	1	0	0	0	-2.48575	-1.70709	1.43029	0.0968492	FALSE	TRUE	TRUE	FALSE	FALSE	FALSE	TRUE	FALSE	FALSE	TRUE
7	SHH	NP_000184.1	-5.104	6	1	1	4	0	-10.767	-1.32622	1.24931	9.86797e-08	TRUE	TRUE	TRUE	FALSE	FALSE	FALSE	TRUE	FALSE	FALSE	TRUE
X	MAGEA1	NP_004979.3	-5.104	1	1	0	0	0	-2.48425	-0.246318	0.279283	0.00160078	FALSE	TRUE	FALSE	FALSE	FALSE	TRUE	FALSE	FALSE	FALSE	FALSE
11	MPPED2	NP_001575.1	-5.102	2	1	0	1	0	-3.836	-0.552539	0.424838	0.000588235	FALSE	TRUE	TRUE	FALSE	FALSE	FALSE	FALSE	FALSE	FALSE	FALSE
11	DSCAML1	NP_065744.3	-5.1	7	1	0	2	4	-6.75975	-4.06797	5.21297	0.0532564	FALSE	TRUE	TRUE	FALSE	FALSE	FALSE	FALSE	FALSE	FALSE	FALSE
1	ELAVL4	NP_001138247.2	-5.099	1	1	0	0	0	-2.94025	-0.809664	0.713085	0.00900817	FALSE	TRUE	TRUE	FALSE	FALSE	FALSE	FALSE	FALSE	FALSE	FALSE
12	ATP5F1B	NP_001677.2	-5.09	3	1	1	0	1	-5.19975	-1.09567	0.820016	0.000479004	FALSE	TRUE	TRUE	FALSE	FALSE	FALSE	FALSE	FALSE	FALSE	FALSE
9	DNAJA1	NP_001530.1	-5.089	2	1	0	0	1	-2.8935	-0.600706	0.566862	0.00510756	FALSE	TRUE	TRUE	FALSE	FALSE	FALSE	FALSE	FALSE	FALSE	FALSE
2	KCNK3	NP_002237.1	-5.087	7	1	1	5	0	-12.8328	-1.16996	1.00156	6.76464e-10	TRUE	TRUE	TRUE	FALSE	FALSE	FALSE	TRUE	TRUE	TRUE	TRUE
10	GATA3	NP_001002295.1	-5.086	2	1	1	0	0	-4.8185	-0.761797	0.811258	0.000419867	FALSE	TRUE	TRUE	FALSE	FALSE	FALSE	TRUE	TRUE	FALSE	TRUE
5	NR3C1	NP_001018087.1	-5.085	2	1	0	1	0	-4.4545	-1.1568	0.88812	0.00198678	FALSE	TRUE	TRUE	FALSE	FALSE	FALSE	FALSE	FALSE	FALSE	FALSE
6	GRIK2	NP_068775.1	-5.0845	3	1	1	1	0	-6.57175	-1.3808	1.40623	0.000225654	FALSE	TRUE	TRUE	FALSE	FALSE	FALSE	TRUE	FALSE	FALSE	TRUE
1	KCNH1	NP_758872.1	-5.083	13	2	7	4	0	-26.1097	-1.86854	1.38447	0	TRUE	TRUE	TRUE	FALSE	FALSE	FALSE	TRUE	TRUE	TRUE	TRUE
18	GNAL	NP_001135811.1	-5.08	1	1	0	0	0	-2.46025	-1.32412	0.715353	0.0303171	FALSE	TRUE	TRUE	FALSE	FALSE	FALSE	FALSE	FALSE	FALSE	FALSE
2	BCL11A	NP_075044.2	-5.073	1	1	0	0	0	-2.45325	-2.00491	1.77568	0.152855	FALSE	TRUE	TRUE	FALSE	FALSE	FALSE	TRUE	TRUE	TRUE	TRUE
9	LRRC8A	NP_001120717.1	-5.069	1	1	0	0	0	-2.90725	-1.41889	2.09333	0.0694755	FALSE	TRUE	TRUE	FALSE	FALSE	FALSE	FALSE	FALSE	FALSE	FALSE
12	NACA	NP_001352825.1	-5.0685	5	1	1	2	1	-9.06525	-2.33263	3.04452	0.000207288	FALSE	TRUE	TRUE	FALSE	FALSE	FALSE	FALSE	FALSE	FALSE	FALSE
14	OTX2	NP_758840.1	-5.0675	2	1	1	0	0	-4.4875	-0.508079	0.403852	0.000133803	FALSE	TRUE	TRUE	FALSE	FALSE	FALSE	TRUE	FALSE	FALSE	TRUE
3	ALCAM	NP_001618.2	-5.0675	1	1	0	0	0	-2.45425	-0.763414	0.871176	0.0221427	FALSE	TRUE	TRUE	FALSE	FALSE	FALSE	FALSE	FALSE	FALSE	FALSE
7	FOXP2	NP_055306.1	-5.064	2	1	1	0	0	-4.748	-1.01587	0.890398	0.00102405	FALSE	TRUE	TRUE	FALSE	FALSE	FALSE	TRUE	TRUE	FALSE	TRUE
14	CCNK	NP_001092872.1	-5.063	2	1	0	1	0	-4.2985	-0.975823	0.77312	0.00150944	FALSE	TRUE	TRUE	FALSE	FALSE	FALSE	TRUE	FALSE	FALSE	TRUE
4	GRIA2	NP_001077088.2	-5.061	9	1	5	3	0	-18.9378	-2.09506	1.41189	1.86969e-13	TRUE	TRUE	TRUE	FALSE	FALSE	FALSE	TRUE	TRUE	TRUE	TRUE
X	PGK1	NP_000282.1	-5.0605	1	1	0	0	0	-2.44075	-0.436916	0.355577	0.00503727	FALSE	TRUE	TRUE	FALSE	FALSE	FALSE	TRUE	FALSE	FALSE	TRUE
10	KCNMA1	NP_002238.2	-5.059	8	1	2	5	0	-14.99	-3.15507	2.24577	6.78813e-08	TRUE	TRUE	TRUE	FALSE	FALSE	FALSE	TRUE	FALSE	FALSE	TRUE
11	PACS1	NP_060496.2	-5.0575	38	36	0	1	1	-89.8815	-1.88023	1.76833	0	TRUE	TRUE	TRUE	FALSE	FALSE	FALSE	TRUE	TRUE	TRUE	TRUE
3	FOXP1	NP_116071.2	-5.05	23	0	22	1	0	-49.7292	-1.1333	1.14428	0	TRUE	FALSE	TRUE	FALSE	FALSE	FALSE	TRUE	TRUE	TRUE	TRUE
1	SLC44A5	NP_001307214.1	-5.0435	1	0	1	0	0	-2.57525	-0.926954	1.05192	0.0300819	FALSE	FALSE	FALSE	FALSE	FALSE	FALSE	FALSE	FALSE	FALSE	FALSE
6	CDK19	NP_055891.1	-5.0365	2	0	1	1	0	-3.9475	-0.922412	0.579827	0.00168104	FALSE	FALSE	FALSE	FALSE	FALSE	FALSE	TRUE	FALSE	FALSE	TRUE
4	REST	NP_005603.3	-5.035	2	0	1	1	0	-4.312	-1.16495	1.20435	0.00393625	FALSE	FALSE	FALSE	FALSE	FALSE	FALSE	FALSE	FALSE	FALSE	FALSE
5	GABRG2	NP_000807.2	-5.0345	7	0	3	2	2	-11.3907	-1.07246	0.727854	3.18724e-09	TRUE	FALSE	TRUE	FALSE	FALSE	FALSE	TRUE	FALSE	FALSE	TRUE
9	RALGPS1	NP_001177659.1	-5.0315	1	0	1	0	0	-2.41175	-0.579844	0.456027	0.00962585	FALSE	FALSE	FALSE	FALSE	FALSE	FALSE	FALSE	FALSE	FALSE	FALSE
12	DDX23	NP_004809.2	-5.028	6	0	5	1	0	-12.639	-1.58718	1.04185	6.18122e-09	TRUE	FALSE	TRUE	FALSE	FALSE	FALSE	TRUE	TRUE	TRUE	TRUE
12	ITGA5	NP_002196.4	-5.0275	5	0	1	1	3	-5.53525	-1.80103	2.10085	0.00434485	FALSE	FALSE	FALSE	FALSE	FALSE	FALSE	FALSE	FALSE	FALSE	FALSE
17	SOX9	NP_000337.1	-5.023	3	0	3	0	0	-7.04425	-1.22892	1.17372	6.03629e-05	FALSE	FALSE	FALSE	FALSE	FALSE	FALSE	TRUE	FALSE	FALSE	TRUE
19	FZR1	NP_001129670.1	-5.0225	2	0	1	1	0	-3.528	-1.38586	1.37732	0.0204542	FALSE	FALSE	FALSE	FALSE	FALSE	FALSE	TRUE	FALSE	FALSE	TRUE
20	TOP1	NP_003277.1	-5.022	1	0	1	0	0	-2.40225	-2.21789	1.15961	0.0866582	FALSE	FALSE	FALSE	FALSE	FALSE	FALSE	FALSE	FALSE	FALSE	FALSE
20	PSMA7	NP_002783.1	-5.0215	1	0	1	0	0	-2.40175	-0.603127	0.558285	0.012133	FALSE	FALSE	FALSE	FALSE	FALSE	FALSE	FALSE	FALSE	FALSE	FALSE
11	ZFP91	NP_444251.1	-5.021	1	0	1	0	0	-3.16525	-1.03608	1.25461	0.0176186	FALSE	FALSE	FALSE	FALSE	FALSE	FALSE	FALSE	FALSE	FALSE	FALSE
1	MFN2	NP_055689.1	-5.0195	8	0	3	4	1	-12.3225	-1.39473	1.51853	7.96916e-09	TRUE	FALSE	TRUE	FALSE	FALSE	FALSE	TRUE	TRUE	TRUE	TRUE
19	NACC1	NP_443108.1	-5.0185	11	0	2	7	2	-14.3907	-1.79997	1.4812	1.23647e-09	TRUE	FALSE	TRUE	FALSE	FALSE	FALSE	TRUE	TRUE	TRUE	TRUE
2	NFE2L2	NP_006155.2	-5.016	3	0	1	0	2	-3.28375	-0.768159	0.756388	0.005132	FALSE	FALSE	FALSE	FALSE	FALSE	FALSE	TRUE	FALSE	FALSE	TRUE
17	ATP6V0A1	NP_001123492.1	-5.0155	11	0	8	3	0	-22.9068	-1.77488	1.55794	1.42643e-17	TRUE	FALSE	TRUE	FALSE	FALSE	FALSE	TRUE	TRUE	TRUE	TRUE
19	PRMT1	NP_001527.3	-5.015	2	0	1	1	0	-4.2445	-1.17914	0.842701	0.00267305	FALSE	FALSE	FALSE	FALSE	FALSE	FALSE	FALSE	FALSE	FALSE	FALSE
8	ATP6V1B2	NP_001684.2	-5.015	4	0	2	2	0	-7.4525	-1.0779	0.8464	1.0149e-05	FALSE	FALSE	FALSE	FALSE	FALSE	FALSE	TRUE	FALSE	FALSE	TRUE
2	MEIS1	NP_002389.1	-5.0145	2	0	1	0	1	-2.7795	-0.809933	0.705319	0.0118945	FALSE	FALSE	FALSE	FALSE	FALSE	FALSE	FALSE	FALSE	FALSE	FALSE
X	LAS1L	NP_112483.1	-5.014	4	0	2	2	0	-8.0235	-1.2089	0.778844	4.31524e-06	FALSE	FALSE	FALSE	FALSE	FALSE	FALSE	TRUE	FALSE	FALSE	TRUE
5	HNRNPH1	NP_001244222.1	-5.0125	3	0	2	1	0	-5.75275	-1.0479	0.671288	0.000125444	FALSE	FALSE	FALSE	FALSE	FALSE	FALSE	TRUE	FALSE	FALSE	TRUE
4	RBPJ	NP_005340.2	-5.01	1	0	1	0	0	-2.39025	-1.07745	0.726884	0.0309925	FALSE	FALSE	FALSE	FALSE	FALSE	FALSE	TRUE	FALSE	FALSE	TRUE
1	NCDN	NP_001014839.1	-5.01	2	0	1	1	0	-3.2545	-1.85852	1.64583	0.058244	FALSE	FALSE	FALSE	FALSE	FALSE	FALSE	TRUE	FALSE	FALSE	TRUE
11	KCNC1	NP_001106212.1	-5.008	5	0	3	1	1	-9.40725	-2.10956	1.4405	1.21881e-05	FALSE	FALSE	FALSE	FALSE	FALSE	FALSE	TRUE	FALSE	FALSE	TRUE
1	HNRNPU	NP_114032.2	-5.0075	3	0	3	0	0	-6.85975	-1.34993	1.1301	9.08534e-05	FALSE	FALSE	FALSE	FALSE	FALSE	FALSE	TRUE	TRUE	FALSE	TRUE
X	L1CAM	NP_000416.1	-5.0075	2	0	1	1	0	-3.5295	-1.64148	1.28257	0.0236892	FALSE	FALSE	FALSE	FALSE	FALSE	FALSE	TRUE	FALSE	FALSE	TRUE
14	TRAF3	NP_003291.2	-5.0055	2	0	1	1	0	-3.4865	-1.4904	1.13797	0.0174726	FALSE	FALSE	FALSE	FALSE	FALSE	FALSE	FALSE	FALSE	FALSE	FALSE
16	AP1G1	NP_001025178.1	-5.0055	4	0	1	3	0	-5.859	-1.37359	1.40074	0.000727723	FALSE	FALSE	FALSE	FALSE	FALSE	FALSE	TRUE	FALSE	FALSE	TRUE
18	MALT1	NP_006776.1	-5.004	2	0	1	1	0	-3.978	-1.33661	1.15484	0.00802305	FALSE	FALSE	FALSE	FALSE	FALSE	FALSE	FALSE	FALSE	FALSE	FALSE
6	CSNK2B	NP_001311.3	-5.002	6	0	1	5	0	-11.0045	-0.567807	0.385663	7.54725e-11	TRUE	FALSE	TRUE	FALSE	FALSE	FALSE	TRUE	TRUE	TRUE	TRUE
19	SHANK1	NP_057232.2	-5.001	5	0	1	0	4	-3.50325	-3.0553	4.62987	0.271303	FALSE	FALSE	FALSE	FALSE	FALSE	FALSE	TRUE	FALSE	FALSE	TRUE
2	SIX3	NP_005404.1	-5.0005	4	0	3	0	1	-7.1505	-0.879297	0.763533	6.13044e-06	FALSE	FALSE	FALSE	FALSE	FALSE	FALSE	TRUE	FALSE	FALSE	TRUE
12	C1R	NP_001341275.1	-5	2	0	1	1	0	-3.6395	-2.33847	1.30285	0.0278158	FALSE	FALSE	FALSE	FALSE	FALSE	FALSE	FALSE	FALSE	FALSE	FALSE
4	KIT	NP_000213.1	-4.996	2	0	1	1	0	-4.3205	-1.56519	1.30534	0.00790676	FALSE	FALSE	FALSE	FALSE	FALSE	FALSE	TRUE	FALSE	FALSE	TRUE
3	DNAJC13	NP_056083.3	-4.9955	3	0	1	0	2	-4.58675	-3.41092	3.5237	0.120919	FALSE	FALSE	FALSE	FALSE	FALSE	FALSE	FALSE	FALSE	FALSE	FALSE
17	KCNH4	NP_036417.1	-4.9925	1	0	1	0	0	-2.37275	-1.99701	2.1892	0.214319	FALSE	FALSE	FALSE	FALSE	FALSE	FALSE	FALSE	FALSE	FALSE	FALSE
19	BRSK1	NP_115806.1	-4.99	1	0	1	0	0	-2.37025	-1.61212	1.55231	0.10736	FALSE	FALSE	FALSE	FALSE	FALSE	FALSE	FALSE	FALSE	FALSE	FALSE
2	DPP10	NP_001171505.1	-4.989	2	0	1	0	1	-3.1125	-1.15734	1.30046	0.0237271	FALSE	FALSE	FALSE	FALSE	FALSE	FALSE	FALSE	FALSE	FALSE	FALSE
18	SMAD4	NP_005350.1	-4.9885	33	0	10	23	0	-56.8592	-1.64602	0.948595	0	TRUE	FALSE	TRUE	FALSE	FALSE	FALSE	TRUE	TRUE	TRUE	TRUE
1	SLC9A1	NP_003038.2	-4.9875	5	0	3	2	0	-10.1873	-1.84236	1.49773	2.25932e-06	TRUE	FALSE	TRUE	FALSE	FALSE	FALSE	FALSE	FALSE	FALSE	TRUE
1	CTPS1	NP_001896.2	-4.9875	1	0	1	0	0	-2.36775	-1.22869	0.911711	0.0499615	FALSE	FALSE	FALSE	FALSE	FALSE	FALSE	FALSE	FALSE	FALSE	FALSE
13	RB1	NP_000312.2	-4.985	3	0	1	1	1	-4.31575	-1.30913	1.25376	0.00530288	FALSE	FALSE	FALSE	FALSE	FALSE	FALSE	FALSE	FALSE	FALSE	FALSE
18	CDH2	NP_001783.2	-4.981	4	0	1	3	0	-7.459	-1.33753	1.34143	3.95574e-05	FALSE	FALSE	FALSE	FALSE	FALSE	FALSE	TRUE	FALSE	FALSE	TRUE
X	MCTS1	NP_001131026.1	-4.9775	1	0	1	0	0	-2.35775	-0.260707	0.133586	0.00155229	FALSE	FALSE	FALSE	FALSE	FALSE	FALSE	FALSE	FALSE	FALSE	FALSE
8	XPO7	NP_055839.3	-4.977	5	0	2	3	0	-8.51275	-2.4088	1.91375	0.000150988	FALSE	FALSE	FALSE	FALSE	FALSE	FALSE	FALSE	FALSE	FALSE	FALSE
12	RAP1B	NP_001010942.1	-4.974	2	0	1	1	0	-4.056	-0.456248	0.266867	0.000177639	FALSE	FALSE	FALSE	FALSE	FALSE	FALSE	TRUE	FALSE	FALSE	TRUE
4	KDR	NP_002244.1	-4.974	3	0	1	2	0	-5.57325	-2.05857	2.24161	0.00685125	FALSE	FALSE	FALSE	FALSE	FALSE	FALSE	FALSE	FALSE	FALSE	FALSE
10	CNNM2	NP_060119.3	-4.9735	2	0	1	1	0	-4.102	-1.67498	1.20793	0.010308	FALSE	FALSE	FALSE	FALSE	FALSE	FALSE	TRUE	FALSE	FALSE	TRUE
16	ST3GAL2	NP_008858.1	-4.9725	2	0	1	1	0	-3.977	-0.668802	0.762865	0.00105728	FALSE	FALSE	FALSE	FALSE	FALSE	FALSE	FALSE	FALSE	FALSE	FALSE
9	TGFBR1	NP_004603.1	-4.9715	3	0	2	1	0	-6.34075	-0.946061	0.820599	4.15193e-05	FALSE	FALSE	FALSE	FALSE	FALSE	FALSE	TRUE	FALSE	FALSE	TRUE
6	GABBR1	NP_001461.1	-4.9715	5	0	1	4	0	-9.52625	-2.20012	1.59769	1.55516e-05	FALSE	FALSE	FALSE	FALSE	FALSE	FALSE	FALSE	FALSE	FALSE	FALSE
10	TM9SF3	NP_064508.3	-4.9715	2	0	1	1	0	-3.7375	-1.07876	0.984958	0.00630302	FALSE	FALSE	FALSE	FALSE	FALSE	FALSE	FALSE	FALSE	FALSE	FALSE
12	KCNA6	NP_002226.1	-4.9705	1	0	1	0	0	-2.35075	-1.35951	1.058	0.0650817	FALSE	FALSE	FALSE	FALSE	FALSE	FALSE	FALSE	FALSE	FALSE	FALSE
19	RAB11B	NP_004209.2	-4.9695	5	0	2	3	0	-9.78525	-0.648262	0.551144	3.89089e-09	TRUE	FALSE	TRUE	FALSE	FALSE	FALSE	TRUE	FALSE	FALSE	TRUE
19	CIC	NP_055940.3	-4.9635	6	0	1	1	4	-5.8545	-2.43852	3.7002	0.0146043	FALSE	FALSE	FALSE	FALSE	FALSE	TRUE	TRUE	FALSE	FALSE	TRUE
12	NFYB	NP_006157.1	-4.9635	1	0	1	0	0	-2.34375	-0.350484	0.200009	0.00297101	FALSE	FALSE	FALSE	FALSE	FALSE	FALSE	FALSE	FALSE	FALSE	FALSE
5	HNRNPA0	NP_006796.1	-4.963	1	0	1	0	0	-2.34325	-1.24315	0.884977	0.0447358	FALSE	FALSE	FALSE	FALSE	FALSE	FALSE	FALSE	FALSE	FALSE	FALSE
1	EIF3I	NP_003748.1	-4.962	2	0	2	0	0	-4.4895	-0.753919	0.67333	0.000515289	FALSE	FALSE	FALSE	FALSE	FALSE	FALSE	FALSE	FALSE	FALSE	FALSE
3	OPA1	NP_056375.2	-4.9615	3	0	2	0	1	-5.07075	-1.45425	1.55868	0.00305088	FALSE	FALSE	FALSE	FALSE	FALSE	FALSE	FALSE	FALSE	FALSE	TRUE
8	ZFTRAF1	NP_001317547.1	-4.961	2	0	2	0	0	-3.9915	-1.96128	0.944089	0.00860809	FALSE	FALSE	FALSE	FALSE	FALSE	FALSE	FALSE	FALSE	FALSE	FALSE
X	NLGN3	NP_061850.2	-4.958	2	0	2	0	0	-4.4975	-1.09828	0.626415	0.000948636	FALSE	FALSE	FALSE	FALSE	FALSE	FALSE	TRUE	FALSE	FALSE	TRUE
19	ERF	NP_006485.2	-4.9565	6	0	3	2	1	-9.4295	-1.11526	1.28017	4.50192e-07	TRUE	FALSE	TRUE	FALSE	FALSE	FALSE	TRUE	TRUE	FALSE	TRUE
12	TMED2	NP_001308374.1	-4.9525	2	0	1	0	1	-2.672	-0.510571	0.398241	0.00454583	FALSE	FALSE	FALSE	FALSE	FALSE	FALSE	FALSE	FALSE	FALSE	FALSE
X	FMR1	NP_002015.1	-4.949	1	0	1	0	0	-2.32925	-0.528899	0.298715	0.00688496	FALSE	FALSE	FALSE	FALSE	FALSE	FALSE	TRUE	FALSE	FALSE	TRUE
11	RHOG	NP_001656.2	-4.9465	3	0	1	0	2	-3.46075	-0.675703	0.437373	0.00174642	FALSE	FALSE	FALSE	FALSE	FALSE	FALSE	FALSE	FALSE	FALSE	FALSE
X	IGBP1	NP_001542.1	-4.9455	3	0	2	1	0	-5.71825	-0.442735	0.360836	4.56305e-06	FALSE	FALSE	FALSE	FALSE	FALSE	FALSE	TRUE	FALSE	FALSE	TRUE
3	TRIM71	NP_001034200.1	-4.945	3	0	1	2	0	-4.87375	-1.48785	1.72163	0.00527526	FALSE	FALSE	FALSE	FALSE	FALSE	FALSE	FALSE	FALSE	FALSE	FALSE
17	GAS7	NP_958839.1	-4.944	1	0	1	0	0					FALSE	FALSE	FALSE	FALSE	FALSE	FALSE	FALSE	FALSE	FALSE	FALSE
X	GLRA2	NP_001112357.1	-4.944	1	0	1	0	0	-2.32425	-0.627992	0.419492	0.0119462	FALSE	FALSE	FALSE	TRUE	FALSE	FALSE	FALSE	FALSE	FALSE	FALSE
3	DHX36	NP_065916.2	-4.9435	3	0	2	0	1	-6.32825	-1.64715	1.68332	0.000798872	FALSE	FALSE	FALSE	FALSE	FALSE	FALSE	FALSE	FALSE	FALSE	FALSE
9	OLFM1	NP_001269540.1	-4.943	4	0	1	3	0	-5.2465	-0.953269	0.689354	0.000246245	FALSE	FALSE	FALSE	FALSE	FALSE	FALSE	FALSE	FALSE	FALSE	FALSE
19	PSMC4	NP_006494.1	-4.942	2	0	1	1	0	-4.1415	-0.994155	0.654889	0.0017227	FALSE	FALSE	FALSE	FALSE	FALSE	FALSE	FALSE	FALSE	FALSE	FALSE
4	PITX2	NP_000316.2	-4.942	2	0	1	0	1	-2.7765	-0.912094	0.853628	0.0177849	FALSE	FALSE	FALSE	FALSE	FALSE	FALSE	TRUE	FALSE	FALSE	TRUE
17	AP2B1	NP_001025177.1	-4.94	1	0	1	0	0	-2.21625	-2.00053	1.16383	0.106931	FALSE	FALSE	FALSE	FALSE	FALSE	FALSE	FALSE	FALSE	FALSE	FALSE
1	ESRRG	NP_001429.2	-4.9395	4	0	2	1	1	-5.894	-0.910792	0.687823	7.17861e-05	FALSE	FALSE	FALSE	FALSE	FALSE	FALSE	FALSE	FALSE	FALSE	FALSE
1	ARF1	NP_001019397.1	-4.9385	7	0	5	2	0	-13.8937	-0.878968	0.424996	2.13141e-11	TRUE	FALSE	TRUE	FALSE	FALSE	FALSE	TRUE	TRUE	TRUE	TRUE
1	CLCN6	NP_001277.2	-4.9375	1	0	1	0	0	-2.31775	-0.894206	1.22714	0.0453577	FALSE	FALSE	FALSE	FALSE	FALSE	FALSE	TRUE	FALSE	FALSE	TRUE
17	YWHAE	NP_006752.1	-4.9355	3	0	3	0	0	-6.68975	-0.811217	0.456293	6.06729e-06	FALSE	FALSE	FALSE	FALSE	FALSE	FALSE	FALSE	FALSE	FALSE	TRUE
5	PDE4D	NP_001098101.1	-4.935	9	0	3	6	0	-16.7922	-1.38122	1.10486	1.54007e-12	TRUE	FALSE	TRUE	FALSE	FALSE	FALSE	TRUE	FALSE	FALSE	TRUE
14	MYH7	NP_000248.2	-4.934	6	0	2	4	0	-10.127	-4.25742	4.32363	0.00170672	FALSE	FALSE	FALSE	FALSE	FALSE	FALSE	FALSE	FALSE	FALSE	FALSE
2	SRSF7	NP_001026854.1	-4.9335	2	0	2	0	0	-4.5875	-0.627691	0.432592	0.000176851	FALSE	FALSE	FALSE	FALSE	FALSE	FALSE	FALSE	FALSE	FALSE	FALSE
6	PCMT1	NP_005380.2	-4.933	1	0	1	0	0	-2.76225	-0.567373	0.366088	0.00392463	FALSE	FALSE	FALSE	FALSE	FALSE	FALSE	FALSE	FALSE	FALSE	FALSE
1	MPZ	NP_000521.2	-4.93	3	0	3	0	0	-6.83125	-0.46806	0.424442	4.48886e-07	TRUE	FALSE	TRUE	FALSE	FALSE	FALSE	TRUE	FALSE	FALSE	TRUE
11	PPME1	NP_001258522.1	-4.9275	1	0	1	0	0	-2.30775	-0.540477	0.392828	0.00949189	FALSE	FALSE	FALSE	FALSE	FALSE	FALSE	FALSE	FALSE	FALSE	FALSE
9	ZNF483	NP_001007170.1	-4.927	2	0	2	0	0	-4.384	-0.276953	0.257682	2.05426e-05	FALSE	FALSE	FALSE	FALSE	FALSE	FALSE	FALSE	FALSE	FALSE	FALSE
5	CERT1	NP_001123577.1	-4.927	9	0	7	2	0	-18.2383	-1.24589	1.08579	5.91394e-15	TRUE	FALSE	TRUE	FALSE	FALSE	FALSE	TRUE	TRUE	TRUE	TRUE
16	ATP6V0C	NP_001185498.1	-4.925	2	0	1	1	0	-3.748	-0.784065	0.448097	0.00128786	FALSE	FALSE	FALSE	FALSE	FALSE	FALSE	TRUE	FALSE	FALSE	TRUE
1	GATAD2B	NP_065750.1	-4.924	3	0	3	0	0	-6.78375	-1.15849	1.00666	4.99235e-05	FALSE	FALSE	FALSE	FALSE	FALSE	FALSE	TRUE	TRUE	FALSE	TRUE
15	MAP2K1	NP_002746.1	-4.9225	25	0	13	12	0	-47.0668	-0.738755	0.411036	0	TRUE	FALSE	TRUE	FALSE	FALSE	FALSE	TRUE	TRUE	TRUE	TRUE
2	PRKCE	NP_005391.1	-4.922	5	0	2	2	1	-7.93625	-1.10938	0.877716	4.73465e-06	FALSE	FALSE	FALSE	FALSE	FALSE	FALSE	FALSE	FALSE	FALSE	FALSE
2	HEATR5B	NP_061897.1	-4.918	5	0	1	1	3	-4.97125	-2.73157	3.57676	0.0537413	FALSE	FALSE	FALSE	FALSE	FALSE	FALSE	FALSE	FALSE	FALSE	FALSE
17	SUMO2	NP_008868.3	-4.916	2	0	1	1	0	-4.1685	-0.309664	0.149599	4.73686e-05	FALSE	FALSE	FALSE	FALSE	FALSE	FALSE	FALSE	FALSE	FALSE	FALSE
2	MYCN	NP_005369.2	-4.9145	3	0	2	1	0	-5.82675	-0.974383	1.27925	0.000202499	FALSE	FALSE	FALSE	FALSE	FALSE	FALSE	TRUE	TRUE	FALSE	TRUE
X	PLP1	NP_000524.3	-4.911	4	0	2	2	0	-7.7085	-0.487437	0.252237	1.34727e-07	TRUE	FALSE	TRUE	FALSE	FALSE	FALSE	TRUE	FALSE	FALSE	TRUE
16	SF3B3	NP_036558.3	-4.91	5	0	1	4	0	-6.89625	-2.94457	2.16967	0.00291821	FALSE	FALSE	FALSE	FALSE	FALSE	FALSE	FALSE	FALSE	FALSE	FALSE
1	SARS1	NP_006504.2	-4.9095	1	0	1	0	0	-2.28975	-1.08976	0.875759	0.0472983	FALSE	FALSE	FALSE	FALSE	FALSE	FALSE	TRUE	FALSE	FALSE	TRUE
11	DRD2	NP_000786.1	-4.909	3	0	1	2	0	-4.98875	-1.02219	0.919787	0.000662568	FALSE	FALSE	FALSE	FALSE	FALSE	FALSE	FALSE	FALSE	FALSE	FALSE
16	DDX19B	NP_009173.1	-4.9085	2	0	1	1	0	-4.2965	-0.749064	0.708056	0.000776481	FALSE	FALSE	FALSE	FALSE	FALSE	FALSE	FALSE	FALSE	FALSE	FALSE
4	UBE2K	NP_005330.1	-4.907	1	0	1	0	0	-2.28725	-0.680303	0.263977	0.00767672	FALSE	FALSE	FALSE	FALSE	FALSE	FALSE	FALSE	FALSE	FALSE	FALSE
17	ZNF207	NP_001091977.1	-4.9065	3	0	1	1	1	-4.45875	-0.507455	0.463401	0.000144945	FALSE	FALSE	FALSE	FALSE	FALSE	FALSE	FALSE	FALSE	FALSE	FALSE
3	RAF1	NP_002871.1	-4.9055	5	0	1	4	0	-8.29775	-1.1598	0.927191	3.07207e-06	FALSE	FALSE	FALSE	FALSE	FALSE	FALSE	TRUE	FALSE	FALSE	TRUE
9	LHX2	NP_004780.3	-4.905	1	0	1	0	0	-2.28525	-1.00029	0.939615	0.0443713	FALSE	FALSE	FALSE	FALSE	FALSE	FALSE	FALSE	FALSE	FALSE	FALSE
11	PSMC3	NP_002795.2	-4.9045	7	0	3	4	0	-14.7837	-1.07741	0.586693	2.5599e-12	TRUE	FALSE	TRUE	FALSE	FALSE	FALSE	FALSE	FALSE	FALSE	FALSE
20	CHMP4B	NP_789782.1	-4.903	1	0	1	0	0	-2.28325	-0.613797	0.461083	0.0130451	FALSE	FALSE	FALSE	FALSE	FALSE	FALSE	FALSE	FALSE	FALSE	FALSE
5	CTNNA1	NP_001894.2	-4.8995	4	0	2	1	1	-5.746	-1.83678	1.73094	0.00260193	FALSE	FALSE	FALSE	FALSE	FALSE	FALSE	FALSE	FALSE	FALSE	FALSE
11	CSTF3	NP_001317.1	-4.895	1	0	1	0	0	-2.16525	-0.0845511	0.0463333	0.000634468	FALSE	FALSE	FALSE	FALSE	FALSE	FALSE	FALSE	FALSE	FALSE	FALSE
16	FOXF1	NP_001442.2	-4.895	3	0	1	2	0	-5.35775	-0.789036	0.822022	0.000164372	FALSE	FALSE	FALSE	FALSE	FALSE	FALSE	TRUE	FALSE	FALSE	TRUE
2	SLC4A10	NP_071341.2	-4.8935	2	0	1	1	0	-3.8695	-1.99529	1.56987	0.0274261	FALSE	FALSE	FALSE	FALSE	FALSE	FALSE	FALSE	FALSE	FALSE	FALSE
X	ZDHHC15	NP_659406.1	-4.892	1	0	1	0	0	-2.27225	-0.378565	0.249088	0.00481011	FALSE	FALSE	FALSE	FALSE	FALSE	FALSE	TRUE	FALSE	FALSE	TRUE
21	RCAN1	NP_004405.3	-4.889	2	0	1	0	1	-2.9435	-0.33398	0.402626	0.000914259	FALSE	FALSE	FALSE	FALSE	FALSE	FALSE	FALSE	FALSE	FALSE	FALSE
X	MED12	NP_005111.2	-4.885	20	0	3	17	0	-35.266	-4.1374	2.40009	0	TRUE	FALSE	TRUE	FALSE	FALSE	FALSE	TRUE	TRUE	TRUE	TRUE
21	AGPAT3	NP_001032642.1	-4.8845	2	0	2	0	0	-4.2735	-0.876996	0.84293	0.00138786	FALSE	FALSE	FALSE	FALSE	FALSE	FALSE	FALSE	FALSE	FALSE	FALSE
11	H2AX	NP_002096.1	-4.88	1	0	1	0	0	-2.26025	-0.401569	0.481226	0.00710831	FALSE	FALSE	FALSE	FALSE	FALSE	FALSE	FALSE	FALSE	FALSE	FALSE
1	XPR1	NP_004727.2	-4.8795	3	0	3	0	0	-6.54775	-1.51619	1.14262	0.000218519	FALSE	FALSE	FALSE	FALSE	FALSE	FALSE	FALSE	FALSE	FALSE	TRUE
1	KCNA3	NP_002223.3	-4.879	4	0	1	2	1	-5.225	-1.35315	1.22206	0.00137447	FALSE	FALSE	FALSE	FALSE	FALSE	FALSE	FALSE	FALSE	FALSE	FALSE
9	RAD23B	NP_002865.1	-4.878	2	0	1	1	0	-4.093	-0.684731	0.572854	0.000755943	FALSE	FALSE	FALSE	FALSE	FALSE	FALSE	FALSE	FALSE	FALSE	FALSE
8	NCOA2	NP_001308632.1	-4.8775	5	0	1	2	2	-4.90875	-2.27516	2.33433	0.0209278	FALSE	FALSE	FALSE	FALSE	FALSE	FALSE	FALSE	FALSE	FALSE	FALSE
1	ZBTB18	NP_991331.1	-4.8765	8	0	3	5	0	-12.374	-1.1136	1.09331	2.57103e-10	TRUE	FALSE	TRUE	FALSE	FALSE	FALSE	TRUE	TRUE	TRUE	TRUE
22	RBX1	NP_055063.1	-4.876	1	0	1	0	0	-2.25625	-0.423583	0.184078	0.00414554	FALSE	FALSE	FALSE	FALSE	FALSE	FALSE	FALSE	FALSE	FALSE	FALSE
19	MAP1S	NP_060644.4	-4.8755	5	0	1	1	3	-3.6765	-0.87949	2.38811	0.00437768	FALSE	FALSE	FALSE	FALSE	FALSE	FALSE	FALSE	FALSE	FALSE	FALSE
X	MMGT1	NP_001316929.1	-4.8735	3	0	1	2	0	-6.04225	-0.183667	0.133909	8.72176e-08	TRUE	FALSE	FALSE	TRUE	FALSE	FALSE	FALSE	TRUE	TRUE	TRUE
5	IK	NP_006074.2	-4.873	4	0	3	0	1	-7.0605	-1.54995	1.06247	8.47892e-05	FALSE	FALSE	FALSE	FALSE	FALSE	FALSE	FALSE	FALSE	FALSE	FALSE
22	GNAZ	NP_002064.1	-4.872	3	0	1	1	1	-4.62675	-1.11798	0.967798	0.00158218	FALSE	FALSE	FALSE	FALSE	FALSE	FALSE	FALSE	FALSE	FALSE	FALSE
5	HCN1	NP_066550.2	-4.871	5	0	1	4	0	-8.53825	-1.53944	1.12954	8.78263e-06	FALSE	FALSE	FALSE	FALSE	FALSE	FALSE	TRUE	FALSE	FALSE	TRUE
3	SATB1	NP_001182399.1	-4.8695	5	0	4	1	0	-10.4598	-1.5366	1.0772	3.0708e-07	TRUE	FALSE	TRUE	FALSE	FALSE	FALSE	TRUE	TRUE	TRUE	TRUE
3	PSMD2	NP_002799.3	-4.8685	3	0	1	2	0	-6.58275	-1.61334	1.73987	0.000594061	FALSE	FALSE	FALSE	FALSE	FALSE	FALSE	FALSE	FALSE	FALSE	FALSE
9	LINGO2	NP_689783.1	-4.8665	1	0	1	0	0	-2.24675	-0.650892	0.880132	0.024725	FALSE	FALSE	FALSE	FALSE	FALSE	FALSE	FALSE	FALSE	FALSE	FALSE
18	ATP5F1A	NP_001001937.1	-4.863	3	0	1	2	0	-6.05425	-1.06249	1.03132	0.000142435	FALSE	FALSE	FALSE	FALSE	FALSE	FALSE	TRUE	FALSE	FALSE	TRUE
22	TCF20	NP_005641.1	-4.862	9	0	1	2	6	-6.872	-2.40086	3.38662	0.00270053	FALSE	FALSE	FALSE	FALSE	FALSE	FALSE	TRUE	TRUE	FALSE	TRUE
2	HECW2	NP_065811.1	-4.8605	20	0	1	19	0	-31.763	-2.65207	2.56103	0	TRUE	FALSE	TRUE	FALSE	FALSE	FALSE	TRUE	TRUE	TRUE	TRUE
10	WAPL	NP_055860.1	-4.86	3	0	1	2	0	-6.35275	-2.33225	1.87188	0.00220309	FALSE	FALSE	FALSE	FALSE	FALSE	FALSE	FALSE	FALSE	FALSE	FALSE
13	LRCH1	NP_001157683.2	-4.86	3	0	1	1	1	-4.54575	-1.08804	1.24588	0.00206046	FALSE	FALSE	FALSE	FALSE	FALSE	FALSE	FALSE	FALSE	FALSE	FALSE
14	MAP4K5	NP_006566.2	-4.86	1	0	1	0	0	-2.24025	-0.713646	0.773948	0.0268146	FALSE	FALSE	FALSE	FALSE	FALSE	FALSE	FALSE	FALSE	FALSE	FALSE
6	TMEM63B	NP_001305721.1	-4.858	7	0	2	5	0	-11.0357	-2.13787	1.71726	1.55419e-06	TRUE	FALSE	TRUE	FALSE	FALSE	FALSE	FALSE	FALSE	FALSE	FALSE
22	SCARF2	NP_699165.3	-4.858	2	0	1	0	1	-2.8785	-2.10572	2.91964	0.183753	FALSE	FALSE	FALSE	FALSE	FALSE	FALSE	TRUE	FALSE	FALSE	TRUE
10	CUL2	NP_001185707.1	-4.857	1	0	1	0	0	-2.23725	-1.44289	1.23327	0.0921113	FALSE	FALSE	FALSE	FALSE	FALSE	FALSE	FALSE	FALSE	FALSE	FALSE
3	BRPF1	NP_001003694.1	-4.856	3	0	1	1	1	-3.75275	-2.65921	2.68545	0.104746	FALSE	FALSE	FALSE	FALSE	FALSE	FALSE	TRUE	TRUE	FALSE	TRUE
7	ADCY1	NP_066939.1	-4.855	2	0	1	1	0	-3.4735	-2.84648	2.51357	0.136353	FALSE	FALSE	FALSE	FALSE	FALSE	FALSE	FALSE	FALSE	FALSE	FALSE
6	GMDS	NP_001491.1	-4.8545	2	0	1	1	0	-3.5715	-0.613898	0.673196	0.00162141	FALSE	FALSE	FALSE	FALSE	FALSE	FALSE	FALSE	FALSE	FALSE	FALSE
20	PHACTR3	NP_001186434.1	-4.851	3	0	1	0	2	-3.65775	-0.989583	1.28102	0.00739108	FALSE	FALSE	FALSE	FALSE	FALSE	FALSE	FALSE	FALSE	FALSE	FALSE
22	SEPTIN5	NP_002679.2	-4.8505	4	0	1	2	1	-4.0185	-0.821976	0.921815	0.00182706	FALSE	FALSE	FALSE	FALSE	FALSE	FALSE	FALSE	FALSE	FALSE	FALSE
X	GPKOW	NP_056513.2	-4.849	2	0	2	0	0	-4.385	-0.653452	0.600885	0.000372252	FALSE	FALSE	FALSE	FALSE	FALSE	FALSE	FALSE	FALSE	FALSE	FALSE
16	VPS4A	NP_037377.1	-4.8475	4	0	1	2	1	-6.8605	-0.756556	0.629808	5.18365e-06	FALSE	FALSE	FALSE	FALSE	FALSE	FALSE	TRUE	FALSE	FALSE	TRUE
7	AGAP3	NP_114152.3	-4.847	6	0	1	3	2	-6.2455	-1.92353	2.09079	0.00206062	FALSE	FALSE	FALSE	FALSE	FALSE	FALSE	FALSE	FALSE	FALSE	FALSE
19	MAST1	NP_055790.1	-4.847	10	0	4	6	0	-17.211	-4.28138	3.88229	1.44354e-07	TRUE	FALSE	TRUE	FALSE	FALSE	FALSE	TRUE	TRUE	TRUE	TRUE
13	ZMYM2	NP_001177894.1	-4.841	2	0	1	1	0	-3.2815	-2.01568	1.83811	0.0722254	FALSE	FALSE	FALSE	FALSE	FALSE	FALSE	TRUE	FALSE	FALSE	TRUE
1	AGO3	NP_079128.2	-4.8405	2	0	1	1	0	-3.826	-2.30114	1.57276	0.0325105	FALSE	FALSE	FALSE	FALSE	FALSE	FALSE	FALSE	FALSE	FALSE	FALSE
13	TNFSF13B	NP_006564.1	-4.8395	1	0	1	0	0	-2.21975	-0.45143	0.39923	0.00927641	FALSE	FALSE	FALSE	FALSE	FALSE	FALSE	FALSE	FALSE	FALSE	FALSE
X	DKC1	NP_001275676.1	-4.8385	2	0	2	0	0	-4.2545	-0.769796	0.320786	0.000333379	FALSE	FALSE	FALSE	FALSE	FALSE	FALSE	TRUE	FALSE	FALSE	TRUE
16	MAF	NP_005351.2	-4.837	6	0	1	5	0	-10.17	-0.649486	1.32443	1.51639e-09	TRUE	FALSE	TRUE	FALSE	FALSE	FALSE	TRUE	FALSE	FALSE	TRUE
7	SP4	NP_003103.2	-4.834	2	0	2	0	0	-5.2025	-0.933973	1.12953	0.000513523	FALSE	FALSE	FALSE	FALSE	FALSE	FALSE	FALSE	FALSE	FALSE	FALSE
12	METAP2	NP_006829.1	-4.8335	1	0	1	0	0	-2.21375	-0.832867	0.552534	0.0245302	FALSE	FALSE	FALSE	FALSE	FALSE	FALSE	FALSE	FALSE	FALSE	FALSE
16	FBXL19	NP_001093254.2	-4.833	5	0	1	2	2	-5.65175	-2.00152	1.9465	0.00453667	FALSE	FALSE	FALSE	FALSE	FALSE	FALSE	FALSE	FALSE	FALSE	FALSE
17	DCAF7	NP_005819.3	-4.832	5	0	2	3	0	-8.85825	-1.2358	0.7153	8.9493e-07	TRUE	FALSE	TRUE	FALSE	FALSE	FALSE	FALSE	FALSE	FALSE	FALSE
14	SUPT16H	NP_009123.1	-4.8275	5	0	1	4	0	-8.36425	-2.44072	1.70195	0.000133301	FALSE	FALSE	FALSE	FALSE	FALSE	FALSE	TRUE	FALSE	FALSE	TRUE
15	SMAD3	NP_005893.1	-4.8265	2	0	1	1	0	-3.4285	-1.24388	0.989749	0.0131183	FALSE	FALSE	FALSE	FALSE	FALSE	FALSE	TRUE	FALSE	FALSE	TRUE
19	GRIN2D	NP_000827.2	-4.8205	2	0	1	1	0	-3.491	-2.62067	2.94377	0.150095	FALSE	FALSE	FALSE	FALSE	FALSE	FALSE	TRUE	FALSE	FALSE	TRUE
17	KCNJ2	NP_000882.1	-4.8165	1	0	1	0	0	-2.19675	-0.927905	0.67327	0.0347999	FALSE	FALSE	FALSE	FALSE	FALSE	FALSE	FALSE	FALSE	FALSE	TRUE
11	FADS2	NP_004256.1	-4.8165	2	0	1	1	0	-3.539	-0.891075	0.658229	0.00382404	FALSE	FALSE	FALSE	FALSE	FALSE	FALSE	FALSE	FALSE	FALSE	FALSE
17	PRKAR1A	NP_002725.1	-4.816	5	0	2	3	0	-8.11425	-0.885424	0.633407	8.40058e-07	TRUE	FALSE	TRUE	FALSE	FALSE	FALSE	TRUE	FALSE	FALSE	TRUE
X	UBA1	NP_003325.2	-4.816	2	0	2	0	0	-4.3435	-1.91399	1.24302	0.0086509	FALSE	FALSE	FALSE	FALSE	FALSE	FALSE	FALSE	FALSE	FALSE	FALSE
20	HNF4A	NP_787110.2	-4.815	4	0	2	1	1	-5.603	-0.795991	0.84114	8.40881e-05	FALSE	FALSE	FALSE	FALSE	FALSE	FALSE	TRUE	FALSE	FALSE	TRUE
21	ADARB1	NP_056648.1	-4.8135	2	0	1	0	1	-2.8935	-0.992543	0.931284	0.0187115	FALSE	FALSE	FALSE	FALSE	FALSE	FALSE	TRUE	FALSE	FALSE	TRUE
1	ZRANB2	NP_976225.1	-4.8135	2	0	1	1	0	-3.5855	-0.516371	0.508712	0.000927826	FALSE	FALSE	FALSE	FALSE	FALSE	FALSE	FALSE	FALSE	FALSE	FALSE
3	DENND6A	NP_689891.1	-4.813	2	0	1	1	0	-3.0455	-0.981634	0.929125	0.014771	FALSE	FALSE	FALSE	FALSE	FALSE	FALSE	FALSE	FALSE	FALSE	FALSE
X	PABIR2	NP_001160071.1	-4.812	2	0	1	1	0	-5.20575	-0.298164	0.23257	2.86051e-06	FALSE	FALSE	FALSE	FALSE	FALSE	FALSE	FALSE	FALSE	FALSE	FALSE
5	LMBRD2	NP_001007528.1	-4.812	4	0	3	0	1	-7.025	-1.16589	0.988576	3.1067e-05	FALSE	FALSE	FALSE	FALSE	FALSE	FALSE	TRUE	FALSE	FALSE	TRUE
22	TUBA8	NP_061816.1	-4.811	2	0	1	1	0	-3.1815	-0.412186	0.960738	0.00109587	FALSE	FALSE	FALSE	FALSE	FALSE	FALSE	TRUE	FALSE	FALSE	TRUE
3	PIK3CB	NP_006210.1	-4.8095	2	0	1	1	0	-3.218	-1.60855	1.45379	0.0419014	FALSE	FALSE	FALSE	FALSE	FALSE	FALSE	FALSE	FALSE	FALSE	FALSE
11	ZDHHC5	NP_056272.2	-4.809	3	0	1	1	1	-3.94675	-1.26418	1.39022	0.00964486	FALSE	FALSE	FALSE	FALSE	FALSE	FALSE	FALSE	FALSE	FALSE	FALSE
2	WDR33	NP_001006624.1	-4.805	1	0	1	0	0	-2.18525	-0.798881	0.436863	0.0192026	FALSE	FALSE	FALSE	FALSE	FALSE	FALSE	FALSE	FALSE	FALSE	FALSE
7	GRB10	NP_001337743.1	-4.804	1	0	1	0	0	-2.30225	-1.01024	1.16553	0.0527212	FALSE	FALSE	FALSE	FALSE	FALSE	FALSE	FALSE	FALSE	FALSE	FALSE
19	IRF2BP1	NP_056464.1	-4.803	2	0	1	1	0	-3.2955	-1.84927	1.84877	0.0618961	FALSE	FALSE	FALSE	FALSE	FALSE	FALSE	FALSE	FALSE	FALSE	FALSE
19	KHSRP	NP_003676.2	-4.8025	4	0	1	1	2	-3.7505	-1.4765	1.37691	0.0168831	FALSE	FALSE	FALSE	FALSE	FALSE	FALSE	FALSE	FALSE	FALSE	FALSE
6	SOX4	NP_003098.1	-4.7995	4	0	2	1	1	-6.347	-0.669723	1.47787	2.331e-05	FALSE	FALSE	FALSE	FALSE	FALSE	TRUE	TRUE	FALSE	FALSE	TRUE
5	CPEB4	NP_001295120.1	-4.7955	1	0	1	0	0	-2.17575	-1.49916	1.01515	0.0826754	FALSE	FALSE	FALSE	FALSE	FALSE	FALSE	FALSE	FALSE	FALSE	FALSE
19	EEF2	NP_001952.1	-4.7955	11	0	2	4	5	-13.3718	-2.40734	2.24993	2.08193e-07	TRUE	FALSE	FALSE	FALSE	FALSE	TRUE	TRUE	FALSE	FALSE	TRUE
X	ADGRG2	NP_001073327.1	-4.7935	1	0	1	0	0	-2.17375	-1.00618	0.765734	0.0446128	FALSE	FALSE	FALSE	FALSE	FALSE	FALSE	FALSE	FALSE	FALSE	FALSE
14	BCL2L2-PABPN1	NP_001374269.1	-4.7915	0	0	0	0	0	-3.5305	-0.767682	0.867681	0.00350531	FALSE	FALSE	FALSE	FALSE	FALSE	FALSE	FALSE	FALSE	FALSE	FALSE
16	SBK1	NP_001019572.1	-4.789	1	0	1	0	0	-2.16925	-0.916372	1.15137	0.0576176	FALSE	FALSE	FALSE	FALSE	FALSE	FALSE	FALSE	FALSE	FALSE	FALSE
2	CDK5R2	NP_003927.1	-4.7855	1	0	1	0	0	-2.16575	-0.913356	1.05117	0.0529858	FALSE	FALSE	FALSE	FALSE	FALSE	FALSE	FALSE	FALSE	FALSE	FALSE
19	AP2A1	NP_055018.2	-4.782	4	0	1	0	3	-2.8845	-2.02459	2.18927	0.126965	FALSE	FALSE	FALSE	FALSE	FALSE	FALSE	FALSE	FALSE	FALSE	FALSE
4	IRF2	NP_002190.2	-4.7815	2	0	1	1	0	-3.519	-0.677229	0.579409	0.00209281	FALSE	FALSE	FALSE	FALSE	FALSE	FALSE	FALSE	FALSE	FALSE	FALSE
21	OLIG2	NP_005797.1	-4.781	1	0	1	0	0	-2.16125	-0.837962	0.943681	0.0446899	FALSE	FALSE	FALSE	FALSE	FALSE	FALSE	FALSE	FALSE	FALSE	FALSE
3	TRPC1	NP_001238774.1	-4.7795	3	0	1	1	1	-3.80825	-1.43699	1.27085	0.0136493	FALSE	FALSE	FALSE	FALSE	FALSE	FALSE	FALSE	FALSE	FALSE	FALSE
7	NAMPT	NP_005737.1	-4.778	2	0	2	0	0	-4.2595	-1.03904	0.662552	0.00151616	FALSE	FALSE	FALSE	FALSE	FALSE	FALSE	FALSE	FALSE	FALSE	FALSE
4	SLC39A8	NP_071437.3	-4.777	3	0	1	2	0	-5.16825	-0.650933	0.674808	8.90782e-05	FALSE	FALSE	FALSE	FALSE	FALSE	FALSE	TRUE	FALSE	FALSE	TRUE
1	HOOK1	NP_056972.1	-4.776	1	0	1	0	0	-2.15625	-1.03791	1.11368	0.0684821	FALSE	FALSE	FALSE	FALSE	FALSE	FALSE	FALSE	FALSE	FALSE	FALSE
12	KCNC2	NP_631875.1	-4.775	3	0	1	2	0	-7.46775	-1.28427	1.00345	2.42078e-05	FALSE	FALSE	FALSE	FALSE	FALSE	FALSE	FALSE	FALSE	FALSE	FALSE
5	PIK3R1	NP_852664.1	-4.7745	9	0	1	7	1	-13.0247	-1.35004	1.15106	1.29109e-09	TRUE	FALSE	TRUE	FALSE	FALSE	FALSE	TRUE	TRUE	TRUE	TRUE
8	CNOT7	NP_001309018.1	-4.7735	2	0	1	1	0	-3.0845	-0.525569	0.379146	0.00205795	FALSE	FALSE	FALSE	FALSE	FALSE	FALSE	FALSE	FALSE	FALSE	FALSE
19	PPFIA3	NP_003651.1	-4.7725	5	0	1	4	0	-8.01975	-3.96381	3.21574	0.0048772	FALSE	FALSE	FALSE	FALSE	FALSE	FALSE	FALSE	FALSE	FALSE	FALSE
5	SLU7	NP_006416.3	-4.7705	3	0	1	1	1	-4.39825	-0.902547	0.816044	0.00112871	FALSE	FALSE	FALSE	FALSE	FALSE	FALSE	FALSE	FALSE	FALSE	FALSE
1	DHDDS	NP_079163.2	-4.7705	10	0	5	5	0	-19.3395	-0.574305	0.49297	0	TRUE	FALSE	TRUE	FALSE	FALSE	FALSE	TRUE	TRUE	TRUE	TRUE
6	LTA	NP_000586.2	-4.768	1	0	1	0	0	-2.00825	-0.33086	0.298507	0.00716002	FALSE	FALSE	FALSE	FALSE	FALSE	FALSE	FALSE	FALSE	FALSE	FALSE
17	RAC3	NP_005043.1	-4.764	2	0	1	0	1	-2.15425	-0.35468	0.470796	0.0073568	FALSE	FALSE	FALSE	FALSE	FALSE	TRUE	TRUE	FALSE	FALSE	TRUE
7	KBTBD2	NP_056298.2	-4.7635	1	0	1	0	0	-2.14375	-0.855398	0.715151	0.0373845	FALSE	FALSE	FALSE	FALSE	FALSE	FALSE	FALSE	FALSE	FALSE	FALSE
2	ELMOD3	NP_001128493.1	-4.763	1	0	1	0	0	-2.14325	-0.473498	0.590971	0.0121794	FALSE	FALSE	FALSE	FALSE	FALSE	FALSE	FALSE	FALSE	FALSE	FALSE
1	SETDB1	NP_001138887.1	-4.7625	2	0	1	1	0	-2.932	-2.47504	2.23824	0.167276	FALSE	FALSE	FALSE	FALSE	FALSE	FALSE	FALSE	FALSE	FALSE	FALSE
20	CENPB	NP_001801.1	-4.7625	1	0	1	0	0	-2.14275	-1.63999	1.67948	0.178041	FALSE	FALSE	FALSE	FALSE	FALSE	FALSE	FALSE	FALSE	FALSE	FALSE
1	UBAP2L	NP_055662.3	-4.7615	3	0	1	1	1	-4.23825	-2.15459	1.80838	0.0270185	FALSE	FALSE	FALSE	FALSE	FALSE	FALSE	FALSE	FALSE	FALSE	FALSE
8	KCNQ3	NP_004510.1	-4.761	15	0	1	14	0	-28.4752	-1.46511	1.3473	0	TRUE	FALSE	TRUE	FALSE	FALSE	FALSE	TRUE	TRUE	TRUE	TRUE
18	AFG3L2	NP_006787.2	-4.7605	5	0	2	3	0	-9.59475	-1.25022	1.08096	5.13368e-07	TRUE	FALSE	TRUE	FALSE	FALSE	FALSE	TRUE	FALSE	FALSE	TRUE
7	PTPN12	NP_002826.3	-4.7585	2	0	1	1	0	-2.973	-1.03647	1.06273	0.0201106	FALSE	FALSE	FALSE	FALSE	FALSE	FALSE	FALSE	FALSE	FALSE	FALSE
1	SLC19A2	NP_008927.1	-4.7585	1	0	1	0	0	-2.13875	-0.660841	0.802716	0.0281284	FALSE	FALSE	FALSE	FALSE	FALSE	FALSE	FALSE	FALSE	FALSE	FALSE
22	MAPK1	NP_002736.3	-4.758	2	0	1	1	0	-2.02525	-0.966799	0.436898	0.025479	FALSE	FALSE	FALSE	FALSE	FALSE	FALSE	TRUE	FALSE	FALSE	TRUE
4	CAMK2D	NP_742113.1	-4.7575	5	0	2	3	0	-6.83	-0.746151	0.488141	4.77995e-06	FALSE	FALSE	FALSE	FALSE	FALSE	FALSE	FALSE	FALSE	FALSE	FALSE
19	SLC1A6	NP_005062.1	-4.757	1	0	1	0	0	-2.13725	-0.689315	0.711416	0.0290815	FALSE	FALSE	FALSE	FALSE	FALSE	FALSE	FALSE	FALSE	FALSE	FALSE
5	JADE2	NP_001276914.1	-4.7515	1	0	1	0	0	-2.13175	-1.76318	1.78163	0.17556	FALSE	FALSE	FALSE	FALSE	FALSE	FALSE	FALSE	FALSE	FALSE	FALSE
X	TFE3	NP_006512.2	-4.7495	9	0	4	5	0	-16.4698	-0.812071	0.554658	7.62468e-15	TRUE	FALSE	TRUE	FALSE	FALSE	FALSE	TRUE	TRUE	TRUE	TRUE
12	ZDHHC17	NP_056151.2	-4.7485	2	0	1	1	0	-4.0525	-0.836679	0.899977	0.00215217	FALSE	FALSE	FALSE	FALSE	FALSE	FALSE	FALSE	FALSE	FALSE	FALSE
6	WASF1	NP_001020105.1	-4.7475	1	0	1	0	0	-2.12775	-1.02608	0.913964	0.0599403	FALSE	FALSE	FALSE	FALSE	FALSE	FALSE	TRUE	FALSE	FALSE	TRUE
1	KDM1A	NP_001009999.1	-4.747	6	0	2	4	0	-10.623	-1.87006	1.32595	8.3908e-07	TRUE	FALSE	TRUE	FALSE	FALSE	FALSE	TRUE	FALSE	FALSE	TRUE
X	KIF4A	NP_036442.3	-4.7465	1	0	1	0	0	-2.12675	-1.62168	1.01721	0.0936128	FALSE	FALSE	FALSE	FALSE	FALSE	FALSE	TRUE	FALSE	FALSE	TRUE
17	WNT3	NP_110380.1	-4.746	1	0	1	0	0	-2.12625	-1.28597	0.947975	0.0725227	FALSE	FALSE	FALSE	FALSE	FALSE	FALSE	TRUE	FALSE	FALSE	TRUE
X	WDR44	NP_061918.3	-4.746	1	0	1	0	0	-2.12625	-1.11945	0.571523	0.0339742	FALSE	FALSE	FALSE	FALSE	FALSE	FALSE	FALSE	FALSE	FALSE	FALSE
8	STK3	NP_001243241.1	-4.745	1	0	1	0	0	-2.12525	-0.541988	0.46981	0.015178	FALSE	FALSE	FALSE	FALSE	FALSE	FALSE	FALSE	FALSE	FALSE	FALSE
6	LRP11	NP_116221.3	-4.745	2	0	1	1	0	-4.97875	-1.16541	1.48735	0.00138583	FALSE	FALSE	FALSE	FALSE	FALSE	FALSE	FALSE	FALSE	FALSE	FALSE
3	BAP1	NP_004647.1	-4.7445	5	0	2	3	0	-9.59425	-1.65427	1.62961	3.23536e-06	FALSE	FALSE	FALSE	FALSE	FALSE	FALSE	TRUE	FALSE	FALSE	TRUE
2	RMND5A	NP_073617.1	-4.744	2	0	1	1	0	-4.005	-0.784182	0.625372	0.0012953	FALSE	FALSE	FALSE	FALSE	FALSE	FALSE	FALSE	FALSE	FALSE	FALSE
9	BRD3	NP_031397.1	-4.743	6	0	1	3	2	-8.3185	-1.62219	1.68181	3.65098e-05	FALSE	FALSE	FALSE	FALSE	FALSE	FALSE	FALSE	FALSE	FALSE	FALSE
3	CAMKV	NP_076951.2	-4.74	1	0	1	0	0	-2.12025	-0.922563	0.604931	0.0349773	FALSE	FALSE	FALSE	FALSE	FALSE	FALSE	FALSE	FALSE	FALSE	FALSE
15	RORA	NP_599023.1	-4.7395	5	0	1	2	2	-6.94425	-0.974077	0.858894	1.87825e-05	FALSE	FALSE	FALSE	FALSE	FALSE	FALSE	TRUE	FALSE	FALSE	TRUE
12	RPS26	NP_001020.2	-4.7385	2	0	1	1	0	-2.975	-0.197997	0.291141	0.000367413	FALSE	FALSE	FALSE	FALSE	FALSE	FALSE	TRUE	FALSE	FALSE	TRUE
3	PFN2	NP_444252.1	-4.738	2	0	1	1	0	-3.599	-0.427857	0.325927	0.000438206	FALSE	FALSE	FALSE	FALSE	FALSE	FALSE	FALSE	FALSE	FALSE	FALSE
1	NFIA	NP_005586.1	-4.7355	5	0	1	4	0	-6.92725	-0.905998	0.840831	9.33474e-06	FALSE	FALSE	FALSE	FALSE	FALSE	FALSE	TRUE	TRUE	FALSE	TRUE
2	PSMD1	NP_002798.2	-4.7355	5	0	1	3	1	-6.50525	-1.70098	1.55186	0.000583611	FALSE	FALSE	FALSE	FALSE	FALSE	FALSE	FALSE	FALSE	FALSE	FALSE
1	HIPK1	NP_938009.1	-4.735	1	0	1	0	0	-2.26325	-1.93364	1.78124	0.176406	FALSE	FALSE	FALSE	FALSE	FALSE	FALSE	FALSE	FALSE	FALSE	FALSE
5	HNRNPAB	NP_112556.2	-4.734	1	0	1	0	0	-2.75525	-0.307167	0.830918	0.00228034	FALSE	FALSE	FALSE	FALSE	FALSE	FALSE	FALSE	FALSE	FALSE	FALSE
13	ARHGEF7	NP_001106983.1	-4.734	2	0	1	0	1	-2.582	-1.15651	1.34676	0.0531349	FALSE	FALSE	FALSE	FALSE	FALSE	FALSE	FALSE	FALSE	FALSE	FALSE
11	IPO7	NP_006382.1	-4.7325	3	0	1	2	0	-4.43275	-1.62994	1.54634	0.00933009	FALSE	FALSE	FALSE	FALSE	FALSE	FALSE	FALSE	FALSE	FALSE	FALSE
20	SNAP25	NP_570824.1	-4.7325	6	0	2	4	0	-10.508	-0.718745	0.462366	1.48361e-09	TRUE	FALSE	TRUE	FALSE	FALSE	FALSE	TRUE	TRUE	FALSE	TRUE
3	SEC62	NP_003253.1	-4.7325	1	0	1	0	0	-2.11275	-0.761222	0.571899	0.0283053	FALSE	FALSE	FALSE	FALSE	FALSE	FALSE	FALSE	FALSE	FALSE	FALSE
3	CPNE4	NP_001276041.1	-4.7305	3	0	1	2	0	-4.29175	-1.139	0.928514	0.00273898	FALSE	FALSE	FALSE	FALSE	FALSE	FALSE	FALSE	FALSE	FALSE	FALSE
18	TXNL4A	NP_006692.1	-4.7295	1	0	1	0	0	-2.10975	-0.653547	0.36864	0.0151343	FALSE	FALSE	FALSE	FALSE	FALSE	FALSE	TRUE	FALSE	FALSE	TRUE
10	ITGB1	NP_002202.2	-4.7295	3	0	1	2	0	-4.75775	-1.47454	1.24467	0.00352362	FALSE	FALSE	FALSE	FALSE	FALSE	FALSE	FALSE	FALSE	FALSE	FALSE
19	PIK3R2	NP_005018.2	-4.729	16	0	2	10	4	-20.3755	-1.19288	2.06655	1.34571e-17	TRUE	FALSE	TRUE	FALSE	FALSE	FALSE	TRUE	TRUE	TRUE	TRUE
19	NOVA2	NP_002507.1	-4.7275	1	0	1	0	0	-2.10775	-2.02632	1.42963	0.162259	FALSE	FALSE	FALSE	FALSE	FALSE	FALSE	TRUE	FALSE	FALSE	TRUE
6	HSF2	NP_001129036.1	-4.727	1	0	1	0	0	-2.10725	-0.733079	0.659961	0.0312648	FALSE	FALSE	FALSE	FALSE	FALSE	FALSE	FALSE	FALSE	FALSE	FALSE
17	ARHGDIA	NP_001172006.1	-4.7255	2	0	1	0	1	-2.4165	-0.385567	0.524923	0.00520229	FALSE	FALSE	FALSE	FALSE	FALSE	FALSE	FALSE	FALSE	FALSE	FALSE
11	SOX6	NP_201583.2	-4.7255	1	0	1	0	0	-2.10575	-0.935837	0.853684	0.0525697	FALSE	FALSE	FALSE	FALSE	FALSE	FALSE	TRUE	FALSE	FALSE	TRUE
9	CD274	NP_054862.1	-4.725	2	0	1	0	1	-2.7495	-0.301158	0.401456	0.00115954	FALSE	FALSE	FALSE	FALSE	FALSE	FALSE	FALSE	FALSE	FALSE	FALSE
2	STK25	NP_001258906.1	-4.725	2	0	1	1	0	-2.48425	-0.700542	0.594279	0.0136275	FALSE	FALSE	FALSE	FALSE	FALSE	FALSE	FALSE	FALSE	FALSE	FALSE
11	MAP3K11	NP_002410.1	-4.724	4	0	1	1	2	-4.82725	-1.50366	2.45209	0.00767314	FALSE	FALSE	FALSE	FALSE	FALSE	FALSE	FALSE	FALSE	FALSE	FALSE
15	IGF1R	NP_000866.1	-4.7235	5	0	1	3	1	-5.44275	-2.71756	3.03146	0.0274832	FALSE	FALSE	FALSE	FALSE	FALSE	FALSE	TRUE	FALSE	FALSE	TRUE
1	CHD5	NP_056372.1	-4.7225	5	0	2	3	0	-9.3975	-3.17515	2.65924	0.000297508	FALSE	FALSE	FALSE	FALSE	FALSE	FALSE	TRUE	FALSE	FALSE	TRUE
2	PPP1R7	NP_002703.1	-4.722	2	0	1	1	0	-3.3385	-0.571508	0.520776	0.00187197	FALSE	FALSE	FALSE	FALSE	FALSE	FALSE	FALSE	FALSE	FALSE	FALSE
2	DNMT3A	NP_783328.1	-4.722	27	0	1	26	0	-37.1103	-2.00252	1.73207	0	TRUE	FALSE	TRUE	FALSE	FALSE	FALSE	TRUE	TRUE	TRUE	TRUE
9	ABL1	NP_009297.2	-4.722	11	0	1	8	2	-13.5258	-2.12983	2.07439	3.98451e-08	TRUE	FALSE	TRUE	FALSE	FALSE	FALSE	TRUE	TRUE	TRUE	TRUE
8	TNKS	NP_003738.2	-4.722	2	0	1	1	0	-3.8745	-1.40343	2.0455	0.0207288	FALSE	FALSE	FALSE	FALSE	FALSE	TRUE	FALSE	FALSE	FALSE	FALSE
2	ATAD2B	NP_001341036.1	-4.7215	4	0	1	2	1	-5.107	-2.72182	2.49612	0.0270347	FALSE	FALSE	FALSE	FALSE	FALSE	FALSE	FALSE	FALSE	FALSE	FALSE
11	CKAP5	NP_001008938.1	-4.721	5	0	1	3	1	-6.41525	-3.07747	3.02511	0.01291	FALSE	FALSE	FALSE	FALSE	FALSE	FALSE	FALSE	FALSE	FALSE	FALSE
X	EBP	NP_006570.1	-4.7195	1	0	1	0	0	-2.09975	-0.329152	0.238255	0.00544123	FALSE	FALSE	FALSE	FALSE	FALSE	FALSE	TRUE	FALSE	FALSE	TRUE
9	TPM2	NP_003280.2	-4.719	2	0	2	0	0	-4.1035	-0.795081	0.554776	0.000991797	FALSE	FALSE	FALSE	FALSE	FALSE	FALSE	TRUE	FALSE	FALSE	TRUE
11	OTUB1	NP_060140.2	-4.719	1	0	1	0	0	-1.92225	-0.534236	0.601655	0.0255672	FALSE	FALSE	FALSE	FALSE	FALSE	FALSE	FALSE	FALSE	FALSE	FALSE
6	POU5F1	NP_002692.2	-4.718	1	0	1	0	0	-2.09825	-0.696611	0.579796	0.0241303	FALSE	FALSE	FALSE	FALSE	FALSE	FALSE	FALSE	FALSE	FALSE	FALSE
6	RING1	NP_002922.2	-4.717	2	0	1	1	0	-3.6815	-0.844389	0.715616	0.00292976	FALSE	FALSE	FALSE	FALSE	FALSE	FALSE	FALSE	FALSE	FALSE	FALSE
X	PHEX	NP_000435.3	-4.7145	2	0	1	1	0	-3.011	-0.823634	0.65669	0.00802648	FALSE	FALSE	FALSE	FALSE	FALSE	FALSE	FALSE	FALSE	FALSE	FALSE
X	P2RY10	NP_938147.1	-4.714	1	0	1	0	0	-2.09425	-0.346354	0.302056	0.00646301	FALSE	FALSE	FALSE	FALSE	FALSE	FALSE	FALSE	FALSE	FALSE	FALSE
14	PPP2R5E	NP_001269108.1	-4.714	1	0	1	0	0	-2.09425	-1.0597	0.700958	0.0443494	FALSE	FALSE	FALSE	FALSE	FALSE	FALSE	FALSE	FALSE	FALSE	FALSE
16	MAPK8IP3	NP_001305781.1	-4.713	10	0	1	9	0	-13.007	-2.82865	3.41125	9.95592e-07	TRUE	FALSE	TRUE	FALSE	FALSE	FALSE	TRUE	FALSE	FALSE	TRUE
22	MTMR3	NP_066576.1	-4.7125	1	0	1	0	0	-2.58425	-2.12583	2.17169	0.171992	FALSE	FALSE	FALSE	FALSE	FALSE	FALSE	FALSE	FALSE	FALSE	FALSE
4	PCGF3	NP_001304765.1	-4.7105	2	0	1	1	0	-3.4105	-0.592057	0.50409	0.00171114	FALSE	FALSE	FALSE	FALSE	FALSE	FALSE	FALSE	FALSE	FALSE	FALSE
2	WDR43	NP_055946.1	-4.71	1	0	1	0	0	-2.09025	-0.82008	1.03129	0.0479245	FALSE	FALSE	FALSE	FALSE	FALSE	FALSE	FALSE	FALSE	FALSE	FALSE
12	KDM2B	NP_115979.3	-4.71	8	0	1	4	3	0	-0.118842	0.0929374	1	FALSE	FALSE	FALSE	FALSE	FALSE	FALSE	FALSE	FALSE	FALSE	FALSE
17	LHX1	NP_005559.2	-4.71	1	0	1	0	0	-2.57125	-0.946509	0.851689	0.0257234	FALSE	FALSE	FALSE	FALSE	FALSE	FALSE	FALSE	FALSE	FALSE	FALSE
8	RAB2A	NP_002856.1	-4.71	2	0	1	1	0	-3.531	-0.732718	0.320156	0.00104923	FALSE	FALSE	FALSE	FALSE	FALSE	FALSE	FALSE	FALSE	FALSE	FALSE
10	DHX32	NP_060650.2	-4.7085	1	0	1	0	0	-2.12225	-0.900034	1.04348	0.0569423	FALSE	FALSE	FALSE	FALSE	FALSE	FALSE	FALSE	FALSE	FALSE	FALSE
20	TM9SF4	NP_055557.2	-4.7045	5	0	1	2	2	-5.13725	-1.38349	1.31478	0.00191871	FALSE	FALSE	FALSE	FALSE	FALSE	FALSE	FALSE	FALSE	FALSE	FALSE
16	TERF2IP	NP_061848.2	-4.7015	2	0	1	1	0	-3.114	-0.584101	0.87884	0.00349903	FALSE	FALSE	FALSE	FALSE	FALSE	FALSE	FALSE	FALSE	FALSE	FALSE
3	AP2M1	NP_001298127.1	-4.698	2	0	1	1	0	-3.774	-1.75526	0.936211	0.00958438	FALSE	FALSE	FALSE	FALSE	FALSE	FALSE	TRUE	FALSE	FALSE	TRUE
11	CADM1	NP_055148.3	-4.698	3	0	1	2	0	-4.72625	-0.609505	0.619797	0.000162776	FALSE	FALSE	FALSE	FALSE	FALSE	FALSE	FALSE	FALSE	FALSE	FALSE
6	IRF4	NP_002451.2	-4.6975	3	0	1	1	1	-3.82875	-1.18088	1.05874	0.00685072	FALSE	FALSE	FALSE	FALSE	FALSE	FALSE	FALSE	FALSE	FALSE	FALSE
3	KPNA1	NP_002255.3	-4.694	2	0	1	1	0	-3.1215	-1.05495	0.784421	0.0111661	FALSE	FALSE	FALSE	FALSE	FALSE	FALSE	FALSE	FALSE	FALSE	FALSE
5	FBXW11	NP_036432.2	-4.693	2	0	1	1	0	-3.7805	-1.18363	0.779749	0.00490857	FALSE	FALSE	FALSE	FALSE	FALSE	FALSE	TRUE	FALSE	FALSE	TRUE
2	AGBL5	NP_068603.4	-4.6925	4	0	1	1	2	-4.216	-1.10929	1.56713	0.00346399	FALSE	FALSE	FALSE	FALSE	FALSE	FALSE	FALSE	FALSE	FALSE	FALSE
X	PHF8	NP_055922.1	-4.6905	3	0	1	1	1	-4.70275	-1.33143	0.771122	0.00127751	FALSE	FALSE	FALSE	FALSE	FALSE	FALSE	TRUE	FALSE	FALSE	TRUE
3	ARF4	NP_001651.1	-4.6895	2	0	1	1	0	-4.2045	-0.313957	0.254121	5.03877e-05	FALSE	FALSE	FALSE	FALSE	FALSE	FALSE	FALSE	FALSE	FALSE	FALSE
16	NUTF2	NP_001308970.1	-4.687	1	0	1	0	0	-2.06725	-0.408356	0.220218	0.00718514	FALSE	FALSE	FALSE	FALSE	FALSE	FALSE	FALSE	FALSE	FALSE	FALSE
11	MARK2	NP_001034558.2	-4.686	5	0	1	4	0	-7.74675	-1.46603	1.10869	2.57099e-05	FALSE	FALSE	FALSE	FALSE	FALSE	FALSE	FALSE	FALSE	FALSE	FALSE
6	ABCF1	NP_001020262.1	-4.686	3	0	1	0	2	-5.363	-1.34711	1.08212	0.000918372	FALSE	FALSE	FALSE	FALSE	FALSE	FALSE	FALSE	FALSE	FALSE	FALSE
15	MFAP1	NP_005917.2	-4.685	3	0	1	2	0	-5.68375	-1.11755	0.832472	0.000220093	FALSE	FALSE	FALSE	FALSE	FALSE	FALSE	FALSE	FALSE	FALSE	FALSE
X	ZC3H12B	NP_001010888.3	-4.685	2	0	1	1	0	-3.123	-0.919026	0.611925	0.00746087	FALSE	FALSE	FALSE	FALSE	FALSE	FALSE	FALSE	FALSE	FALSE	FALSE
22	SF3A1	NP_005868.1	-4.6845	3	0	1	2	0	-5.40175	-1.5842	1.20369	0.00146029	FALSE	FALSE	FALSE	FALSE	FALSE	FALSE	FALSE	FALSE	FALSE	FALSE
11	RAG1	NP_000439.2	-4.6835	3	0	1	1	1	-3.48225	-1.01753	1.66746	0.00954216	FALSE	FALSE	FALSE	FALSE	FALSE	FALSE	FALSE	FALSE	FALSE	FALSE
11	SHANK2	NP_573573.2	-4.6825	5	0	1	1	3	-4.70625	-2.55344	3.10137	0.0507831	FALSE	FALSE	FALSE	FALSE	FALSE	FALSE	TRUE	FALSE	FALSE	TRUE
15	SLC12A6	NP_598408.1	-4.682	3	0	1	2	0	-5.41075	-2.1351	1.89882	0.00714431	FALSE	FALSE	FALSE	FALSE	FALSE	FALSE	TRUE	FALSE	FALSE	TRUE
12	NAB2	NP_005958.1	-4.68	1	0	1	0	0	-2.06025	-1.16901	0.951315	0.0734216	FALSE	FALSE	FALSE	FALSE	FALSE	FALSE	FALSE	FALSE	FALSE	FALSE
1	SLC30A10	NP_061183.2	-4.6795	1	0	1	0	0	-2.05975	-0.957986	1.05051	0.0658661	FALSE	FALSE	FALSE	FALSE	FALSE	FALSE	FALSE	FALSE	FALSE	FALSE
2	SLC8A1	NP_066920.1	-4.676	1	0	1	0	0	-2.05625	-0.905681	0.952575	0.0574344	FALSE	FALSE	FALSE	FALSE	FALSE	FALSE	FALSE	FALSE	FALSE	FALSE
2	TMEM163	NP_112185.1	-4.676	3	0	1	2	0	-4.42375	-0.452203	0.571674	8.14314e-05	FALSE	FALSE	FALSE	FALSE	FALSE	FALSE	FALSE	FALSE	FALSE	FALSE
2	CNOT9	NP_001258563.1	-4.676	2	0	1	1	0	-3.1945	-0.868972	0.562328	0.00519732	FALSE	FALSE	FALSE	FALSE	FALSE	FALSE	FALSE	FALSE	FALSE	FALSE
7	ABCF2-H2BK1	NP_005683.2	-4.674	1	0	1	0	0	-2.05425	-1.06311	1.01262	0.0737388	FALSE	FALSE	FALSE	FALSE	FALSE	FALSE	FALSE	FALSE	FALSE	FALSE
9	PBX3	NP_006186.1	-4.674	3	0	2	1	0	-5.93425	-0.632312	0.587022	1.48937e-05	FALSE	FALSE	FALSE	FALSE	FALSE	FALSE	FALSE	FALSE	FALSE	FALSE
11	YAP1	NP_001123617.1	-4.6735	1	0	1	0	0	-2.05375	-0.701218	0.83323	0.0372885	FALSE	FALSE	FALSE	FALSE	FALSE	FALSE	TRUE	FALSE	FALSE	TRUE
10	EGR2	NP_001129649.1	-4.6735	2	0	2	0	0	-4.081	-1.17263	1.10423	0.00499483	FALSE	FALSE	FALSE	FALSE	FALSE	FALSE	TRUE	FALSE	FALSE	TRUE
6	SCML4	NP_932347.2	-4.6725	3	0	1	0	2	-2.79625	-0.474129	0.868411	0.00300537	FALSE	FALSE	FALSE	FALSE	FALSE	FALSE	FALSE	FALSE	FALSE	FALSE
6	DDX39B	NP_004631.1	-4.6725	1	0	1	0	0	-2.01725	-1.48475	0.800977	0.0704317	FALSE	FALSE	FALSE	FALSE	FALSE	FALSE	FALSE	FALSE	FALSE	FALSE
7	CACNA2D1	NP_000713.2	-4.672	2	0	1	1	0	-2.8975	-2.15246	1.66794	0.0975907	FALSE	FALSE	FALSE	FALSE	FALSE	FALSE	FALSE	FALSE	FALSE	FALSE
6	TRIM27	NP_006501.1	-4.6705	1	0	1	0	0	-2.05075	-1.20332	1.02729	0.0862524	FALSE	FALSE	FALSE	FALSE	FALSE	FALSE	FALSE	FALSE	FALSE	FALSE
11	SSRP1	NP_003137.1	-4.6705	2	0	1	1	0	-3.701	-1.46569	1.14302	0.0134819	FALSE	FALSE	FALSE	FALSE	FALSE	FALSE	FALSE	FALSE	FALSE	FALSE
9	RRAGA	NP_006561.1	-4.67	2	0	1	1	0	-3.2685	-1.02518	0.743688	0.00830471	FALSE	FALSE	FALSE	FALSE	FALSE	FALSE	FALSE	FALSE	FALSE	FALSE
3	U2SURP	NP_001073884.1	-4.67	4	0	1	2	1	-5.4475	-2.14261	1.47896	0.00362261	FALSE	FALSE	FALSE	FALSE	FALSE	FALSE	FALSE	FALSE	FALSE	FALSE
15	TP53BP1	NP_005648.1	-4.67	5	0	1	4	0	-6.31725	-2.4693	2.90865	0.00699051	FALSE	FALSE	FALSE	FALSE	FALSE	FALSE	FALSE	FALSE	FALSE	FALSE
17	SUZ12	NP_056170.2	-4.6685	1	0	1	0	0	-2.04875	-1.5291	1.10643	0.108672	FALSE	FALSE	FALSE	FALSE	FALSE	FALSE	TRUE	FALSE	FALSE	TRUE
6	FOXC1	NP_001444.2	-4.668	4	0	1	2	1	-5.43025	-0.645387	1.61075	9.26085e-05	FALSE	FALSE	FALSE	FALSE	FALSE	TRUE	TRUE	FALSE	FALSE	TRUE
17	RPTOR	NP_065812.1	-4.6675	2	0	1	1	0	-2.8965	-3.875	3.31811	0.365435	FALSE	FALSE	FALSE	FALSE	FALSE	FALSE	FALSE	FALSE	FALSE	FALSE
19	MAST3	NP_055831.1	-4.664	11	0	1	7	3	-12.1067	-3.12721	3.65022	1.58437e-05	FALSE	FALSE	FALSE	FALSE	FALSE	FALSE	FALSE	FALSE	FALSE	FALSE
7	CASD1	NP_075051.4	-4.664	2	0	1	1	0	-2.8935	-1.12885	1.17444	0.0288209	FALSE	FALSE	FALSE	FALSE	FALSE	FALSE	FALSE	FALSE	FALSE	FALSE
1	PLA2G4A	NP_077734.2	-4.6635	2	0	1	1	0	-3.195	-1.04737	1.00327	0.0140658	FALSE	FALSE	FALSE	FALSE	FALSE	FALSE	FALSE	FALSE	FALSE	FALSE
16	GSPT1	NP_001123478.2	-4.6625	2	0	1	1	0	-3.7765	-0.98483	0.678913	0.00300441	FALSE	FALSE	FALSE	FALSE	FALSE	FALSE	FALSE	FALSE	FALSE	FALSE
4	HERC3	NP_055421.1	-4.661	3	0	1	1	1	-4.01175	-1.95836	1.60975	0.0238202	FALSE	FALSE	FALSE	FALSE	FALSE	FALSE	FALSE	FALSE	FALSE	FALSE
14	MARK3	NP_001122390.2	-4.6605	4	0	1	2	1	-6.99025	-1.24461	1.47679	6.65016e-05	FALSE	FALSE	FALSE	FALSE	FALSE	FALSE	FALSE	FALSE	FALSE	FALSE
16	NUDT21	NP_008937.1	-4.658	1	0	1	0	0	-2.03825	-0.6845	0.333811	0.0158138	FALSE	FALSE	FALSE	FALSE	FALSE	FALSE	FALSE	FALSE	FALSE	FALSE
6	H2AC8	NP_066390.1	-4.6565	4	0	1	0	3	-3.2325	-0.0905315	0.435774	4.99747e-05	FALSE	FALSE	FALSE	FALSE	FALSE	FALSE	FALSE	FALSE	FALSE	FALSE
20	GNAS	NP_536350.2	-4.6555	11	0	1	9	1	-18.2853	-2.17832	2.81196	1.81675e-11	TRUE	FALSE	TRUE	FALSE	FALSE	FALSE	TRUE	TRUE	TRUE	TRUE
7	ABCF2	NP_009120.1	-4.654	0	0	0	0	0					FALSE	FALSE	FALSE	FALSE	FALSE	FALSE	FALSE	FALSE	FALSE	FALSE
1	ZNF684	NP_689586.3	-4.653	1	0	1	0	0	-2.03325	-0.28763	0.371585	0.00536075	FALSE	FALSE	FALSE	FALSE	FALSE	FALSE	FALSE	FALSE	FALSE	FALSE
17	ASIC2	NP_899233.1	-4.651	3	0	1	1	1	-3.71075	-0.910642	1.12431	0.00482534	FALSE	FALSE	FALSE	FALSE	FALSE	FALSE	FALSE	FALSE	FALSE	FALSE
6	SCUBE3	NP_689966.2	-4.6505	3	0	1	1	1	-3.92775	-1.8109	2.10151	0.0350211	FALSE	FALSE	FALSE	FALSE	FALSE	FALSE	TRUE	FALSE	FALSE	TRUE
2	PLCL1	NP_006217.3	-4.65	1	0	1	0	0	-2.03025	-1.2675	1.43003	0.128905	FALSE	FALSE	FALSE	FALSE	FALSE	FALSE	FALSE	FALSE	FALSE	FALSE
19	ZNF536	NP_055532.1	-4.6495	3	0	1	1	1	-4.06025	-2.46737	3.12257	0.0901249	FALSE	FALSE	FALSE	FALSE	FALSE	FALSE	FALSE	FALSE	FALSE	FALSE
14	CKB	NP_001814.2	-4.6485	1	0	1	0	0	-2.02875	-0.99712	1.09182	0.0746153	FALSE	FALSE	FALSE	FALSE	FALSE	FALSE	FALSE	FALSE	FALSE	FALSE
3	RASSF1	NP_009113.3	-4.648	1	0	1	0	0	-2.02825	-0.442227	0.693968	0.011614	FALSE	FALSE	FALSE	FALSE	FALSE	FALSE	FALSE	FALSE	FALSE	FALSE
2	HDAC4	NP_006028.2	-4.6475	9	0	1	6	2	-12.3042	-2.2212	2.7549	8.99408e-07	TRUE	FALSE	TRUE	FALSE	FALSE	FALSE	TRUE	TRUE	TRUE	TRUE
4	CLCN3	NP_776297.2	-4.6465	2	0	1	0	1	-2.9085	-1.46311	0.989207	0.02959	FALSE	FALSE	FALSE	FALSE	FALSE	FALSE	TRUE	FALSE	FALSE	TRUE
5	ECSCR	NP_001071161.1	-4.646	1	0	1	0	0	0	-0.166088	0.114204	1	FALSE	FALSE	FALSE	FALSE	FALSE	FALSE	FALSE	FALSE	FALSE	FALSE
22	CSF2RB	NP_000386.1	-4.646	3	0	1	0	2	-3.29375	-1.09279	1.84389	0.0208065	FALSE	FALSE	FALSE	FALSE	FALSE	FALSE	FALSE	FALSE	FALSE	FALSE
17	LIG3	NP_039269.2	-4.646	5	0	1	2	2	-4.74025	-1.55998	1.78761	0.00651914	FALSE	FALSE	FALSE	FALSE	FALSE	FALSE	FALSE	FALSE	FALSE	FALSE
6	H2BC5	NP_066407.1	-4.6425	3	0	1	1	1	-2.7925	-0.0978535	0.345644	8.12403e-05	FALSE	FALSE	FALSE	FALSE	FALSE	TRUE	FALSE	FALSE	FALSE	FALSE
10	ERLIN1	NP_006450.2	-4.6425	2	0	1	1	0	-2.928	-0.540108	0.51497	0.00368592	FALSE	FALSE	FALSE	FALSE	FALSE	FALSE	FALSE	FALSE	FALSE	FALSE
1	RIT1	NP_008843.1	-4.642	7	0	1	5	1	-10.5947	-0.430409	0.379231	4.33161e-11	TRUE	FALSE	TRUE	FALSE	FALSE	FALSE	TRUE	TRUE	TRUE	TRUE
3	ATP13A3	NP_078800.3	-4.641	4	0	1	2	1	-4.8085	-1.84447	1.78517	0.00965545	FALSE	FALSE	FALSE	FALSE	FALSE	FALSE	FALSE	FALSE	FALSE	FALSE
2	RHOB	NP_004031.1	-4.64	3	0	2	0	1	-4.33375	-0.791056	0.601997	0.000680545	FALSE	FALSE	FALSE	FALSE	FALSE	FALSE	FALSE	FALSE	FALSE	FALSE
18	YES1	NP_005424.1	-4.6385	3	0	1	2	0	-4.85175	-0.560003	0.458808	7.39694e-05	FALSE	FALSE	FALSE	FALSE	FALSE	FALSE	FALSE	FALSE	FALSE	FALSE
2	STRN	NP_003153.2	-4.6385	1	0	1	0	0	-2.01875	-0.764782	1.10147	0.0510515	FALSE	FALSE	FALSE	FALSE	FALSE	FALSE	FALSE	FALSE	FALSE	FALSE
11	CBL	NP_005179.2	-4.636	8	0	1	7	0	-12.834	-0.992099	1.17618	1.16669e-11	TRUE	FALSE	TRUE	FALSE	FALSE	FALSE	TRUE	TRUE	TRUE	TRUE
22	NF2	NP_000259.1	-4.635	1	0	1	0	0	-2.01525	-1.1834	1.09774	0.0948085	FALSE	FALSE	FALSE	FALSE	FALSE	FALSE	FALSE	FALSE	FALSE	FALSE
11	SF3B2	NP_006833.2	-4.635	6	0	1	4	1	-8.222	-1.3947	1.13251	9.60194e-06	FALSE	FALSE	FALSE	FALSE	FALSE	FALSE	FALSE	FALSE	FALSE	FALSE
1	PLD5	NP_001358991.1	-4.634	2	0	1	0	1	-2.5695	-0.796432	0.975666	0.0225726	FALSE	FALSE	FALSE	FALSE	FALSE	FALSE	FALSE	FALSE	FALSE	FALSE
X	SPIN4	NP_001012986.2	-4.6335	2	0	1	1	0	-3.517	-0.426564	0.283944	0.000477046	FALSE	FALSE	FALSE	FALSE	FALSE	FALSE	FALSE	FALSE	FALSE	FALSE
20	SLC12A5	NP_001128243.1	-4.6305	2	0	1	0	1	-2.554	-3.02956	2.57343	0.290979	FALSE	FALSE	FALSE	FALSE	FALSE	FALSE	TRUE	FALSE	FALSE	TRUE
17	NPEPPS	NP_006301.3	-4.63	2	0	1	1	0	-3.0755	-1.94345	1.46077	0.0590278	FALSE	FALSE	FALSE	FALSE	FALSE	FALSE	FALSE	FALSE	FALSE	FALSE
5	ADCY2	NP_065433.2	-4.6265	6	0	1	4	1	-8.1265	-2.6387	2.22935	0.000514288	FALSE	FALSE	FALSE	FALSE	FALSE	FALSE	FALSE	FALSE	FALSE	FALSE
17	PRKCA	NP_002728.2	-4.6265	2	0	2	0	0	-4.008	-0.899657	0.677017	0.00179935	FALSE	FALSE	FALSE	FALSE	FALSE	FALSE	FALSE	FALSE	FALSE	FALSE
17	SOCS7	NP_055413.2	-4.626	2	0	1	0	1	-2.8015	-1.29609	1.39622	0.0476097	FALSE	FALSE	FALSE	FALSE	FALSE	FALSE	FALSE	FALSE	FALSE	FALSE
5	FAM193B	NP_001177875.1	-4.626	1	0	1	0	0	-2.00625	-0.705713	1.11834	0.0428995	FALSE	FALSE	FALSE	FALSE	FALSE	FALSE	FALSE	FALSE	FALSE	FALSE
X	VMA21	NP_001017980.1	-4.625	1	0	1	0	0	-2.00525	-0.132059	0.0889595	0.00129604	FALSE	FALSE	FALSE	TRUE	FALSE	FALSE	FALSE	FALSE	FALSE	FALSE
13	COL4A1	NP_001290039.1	-4.625	4	0	1	3	0	-6.558	-0.931248	0.884313	2.61417e-05	FALSE	FALSE	FALSE	FALSE	FALSE	FALSE	TRUE	TRUE	TRUE	TRUE
17	USP22	NP_056091.1	-4.6235	2	0	1	1	0	-3.3795	-1.1144	0.705984	0.00681542	FALSE	FALSE	FALSE	FALSE	FALSE	FALSE	FALSE	FALSE	FALSE	FALSE
11	MYRF	NP_001120864.1	-4.6225	5	0	1	3	1	-6.84175	-2.18073	1.86086	0.00108417	FALSE	FALSE	FALSE	FALSE	FALSE	FALSE	TRUE	FALSE	FALSE	TRUE
4	RBM46	NP_659416.1	-4.619	2	0	1	1	0	-3.26	-0.861873	0.495345	0.00386252	FALSE	FALSE	FALSE	FALSE	FALSE	FALSE	FALSE	FALSE	FALSE	FALSE
19	PTBP1	NP_002810.1	-4.6185	3	0	1	0	2	-2.4125	-0.948366	1.30339	0.0470167	FALSE	FALSE	FALSE	FALSE	FALSE	TRUE	FALSE	FALSE	FALSE	FALSE
18	GATA6	NP_005248.2	-4.618	1	0	1	0	0	-1.99825	-1.07717	1.31081	0.0990145	FALSE	FALSE	FALSE	FALSE	FALSE	FALSE	TRUE	FALSE	FALSE	TRUE
1	TTC13	NP_078801.3	-4.6165	1	0	0	1	0	-3.2945	-1.22188	1.60744	0.0241387	FALSE	FALSE	FALSE	FALSE	FALSE	FALSE	FALSE	FALSE	FALSE	FALSE
19	STK11	NP_000446.1	-4.614	1	0	0	1	0	-1.99425	-0.663715	0.697183	0.0323753	FALSE	FALSE	FALSE	FALSE	FALSE	FALSE	FALSE	FALSE	FALSE	FALSE
8	RAD21	NP_006256.1	-4.6135	3	0	0	2	1	-4.08775	-1.35595	1.02222	0.00560298	FALSE	FALSE	FALSE	FALSE	FALSE	FALSE	TRUE	FALSE	FALSE	TRUE
5	DROSHA	NP_037367.3	-4.6125	2	0	0	2	0	-3.7615	-2.32941	1.99272	0.0594815	FALSE	FALSE	FALSE	FALSE	FALSE	FALSE	FALSE	FALSE	FALSE	FALSE
9	SMU1	NP_060695.2	-4.61	1	0	0	1	0	-1.99025	-1.37445	0.838655	0.0791904	FALSE	FALSE	FALSE	FALSE	FALSE	FALSE	FALSE	FALSE	FALSE	FALSE
9	NTRK2	NP_006171.2	-4.6095	6	0	0	6	0	-9.102	-2.01981	1.53335	1.85433e-05	FALSE	FALSE	FALSE	FALSE	FALSE	FALSE	TRUE	FALSE	FALSE	TRUE
9	UHRF2	NP_690856.1	-4.6095	1	0	0	1	0					FALSE	FALSE	FALSE	FALSE	FALSE	FALSE	FALSE	FALSE	FALSE	FALSE
17	RPL19	NP_000972.1	-4.6095	4	0	0	2	2	-3.41025	-0.341543	0.431601	0.000415518	FALSE	FALSE	FALSE	FALSE	FALSE	FALSE	FALSE	FALSE	FALSE	FALSE
1	ASAP3	NP_060177.2	-4.608	2	0	0	1	1	-2.366	-1.42252	1.7426	0.12144	FALSE	FALSE	FALSE	FALSE	FALSE	FALSE	FALSE	FALSE	FALSE	FALSE
1	LHX9	NP_064589.2	-4.6075	1	0	0	1	0	-1.98775	-0.704567	0.663259	0.0358614	FALSE	FALSE	FALSE	FALSE	FALSE	FALSE	FALSE	FALSE	FALSE	FALSE
8	MROH1	NP_115826.3	-4.6065	1	0	0	1	0	-1.98925	-7.71812	3.9422	0.702976	FALSE	FALSE	FALSE	TRUE	FALSE	FALSE	FALSE	FALSE	FALSE	FALSE
5	SLC12A2	NP_001037.1	-4.606	3	0	0	3	0	-6.76725	-1.54276	1.69965	0.000339386	FALSE	FALSE	FALSE	FALSE	FALSE	FALSE	FALSE	FALSE	FALSE	FALSE
5	LMNB1	NP_005564.1	-4.6055	6	0	0	4	2	-5.62925	-0.943647	1.26697	0.000202412	FALSE	FALSE	FALSE	FALSE	FALSE	FALSE	TRUE	FALSE	FALSE	TRUE
2	MCM6	NP_005906.2	-4.605	3	0	0	3	0	-5.77775	-1.22315	1.31522	0.000446117	FALSE	FALSE	FALSE	FALSE	FALSE	FALSE	FALSE	FALSE	FALSE	FALSE
9	TLE4	NP_001269677.1	-4.6035	1	0	0	1	0	-2.0095	-1.49812	1.60851	0.150299	FALSE	FALSE	FALSE	FALSE	FALSE	FALSE	FALSE	FALSE	FALSE	FALSE
2	SNRNP200	NP_054733.2	-4.6015	10	0	0	8	2	-10.6405	-5.03057	4.14558	0.00148315	FALSE	FALSE	FALSE	FALSE	FALSE	FALSE	FALSE	FALSE	FALSE	FALSE
1	KIF1B	NP_055889.2	-4.601	2	0	0	2	0	-2.8995	-3.70221	3.38823	0.379719	FALSE	FALSE	FALSE	FALSE	FALSE	FALSE	FALSE	FALSE	FALSE	FALSE
7	CAMK2B	NP_001211.3	-4.6005	7	0	0	7	0	-9.13925	-1.1201	0.767042	3.86442e-07	TRUE	FALSE	TRUE	FALSE	FALSE	FALSE	TRUE	TRUE	TRUE	TRUE
9	PHF19	NP_056466.1	-4.5995	2	0	0	2	0	-3.1815	-1.37383	1.09833	0.0238873	FALSE	FALSE	FALSE	FALSE	FALSE	FALSE	FALSE	FALSE	FALSE	FALSE
9	NR5A1	NP_004950.2	-4.598	2	0	0	2	0	-3.482	-1.308	1.16708	0.0152612	FALSE	FALSE	FALSE	FALSE	FALSE	FALSE	TRUE	FALSE	FALSE	TRUE
X	MECP2	NP_001104262.1	-4.5975	38	0	0	36	2	-50.7695	-0.334278	0.487416	0	TRUE	FALSE	FALSE	FALSE	FALSE	TRUE	TRUE	TRUE	TRUE	TRUE
13	ABCC4	NP_001288758.1	-4.596	4	0	0	2	2	-4.185	-1.7015	2.23366	0.0228555	FALSE	FALSE	FALSE	FALSE	FALSE	FALSE	FALSE	FALSE	FALSE	FALSE
12	LRP6	NP_002327.2	-4.595	5	0	0	3	2	-6.45275	-2.38202	2.39601	0.00395823	FALSE	FALSE	FALSE	FALSE	FALSE	FALSE	TRUE	FALSE	FALSE	TRUE
15	SIN3A	NP_001138830.1	-4.595	4	0	0	3	1	-5.415	-2.37768	1.95468	0.00923881	FALSE	FALSE	FALSE	FALSE	FALSE	FALSE	TRUE	TRUE	FALSE	TRUE
15	ITPKA	NP_002211.1	-4.5945	1	0	0	1	0	-1.97475	-1.02968	1.11354	0.0861227	FALSE	FALSE	FALSE	FALSE	FALSE	FALSE	FALSE	FALSE	FALSE	FALSE
19	ELAVL3	NP_001411.2	-4.593	3	0	0	3	0	-4.20125	-1.05766	0.91348	0.00270271	FALSE	FALSE	FALSE	FALSE	FALSE	FALSE	FALSE	FALSE	FALSE	FALSE
7	USP42	NP_115548.1	-4.5925	1	0	0	1	0	-1.8335	-0.964787	2.48075	0.13683	FALSE	FALSE	FALSE	FALSE	FALSE	FALSE	FALSE	FALSE	FALSE	FALSE
4	MAEA	NP_001017405.1	-4.591	6	0	0	3	3	-4.3965	-0.832251	1.07246	0.00124104	FALSE	FALSE	FALSE	FALSE	FALSE	FALSE	FALSE	FALSE	FALSE	FALSE
1	SRM	NP_003123.2	-4.588	2	0	0	2	0	-3.2565	-0.832144	0.690411	0.00564053	FALSE	FALSE	FALSE	FALSE	FALSE	FALSE	FALSE	FALSE	FALSE	FALSE
2	POLR1A	NP_056240.2	-4.5875	9	0	0	5	4	-6.20925	-2.13437	2.10932	0.0030012	FALSE	FALSE	FALSE	FALSE	FALSE	FALSE	TRUE	FALSE	FALSE	TRUE
17	NLGN2	NP_065846.1	-4.5855	6	0	0	4	2	-6.7595	-1.61544	1.46967	0.000308863	FALSE	FALSE	FALSE	FALSE	FALSE	FALSE	FALSE	FALSE	FALSE	FALSE
1	ZNF644	NP_958357.1	-4.583	3	0	0	3	0	-3.79125	-1.57682	1.81076	0.0251521	FALSE	FALSE	FALSE	FALSE	FALSE	FALSE	FALSE	FALSE	FALSE	FALSE
1	SF3A3	NP_006793.1	-4.583	1	0	0	1	0	-1.96325	-1.27007	0.839095	0.0785011	FALSE	FALSE	FALSE	FALSE	FALSE	FALSE	FALSE	FALSE	FALSE	FALSE
3	MYD88	NP_001166038.2	-4.583	1	0	0	1	0	-1.96325	-0.620106	0.736712	0.0323492	FALSE	FALSE	FALSE	FALSE	FALSE	FALSE	FALSE	FALSE	FALSE	FALSE
19	MAP2K7	NP_660186.1	-4.5815	2	0	0	2	0	-3.4885	-0.879631	0.774422	0.00472406	FALSE	FALSE	FALSE	FALSE	FALSE	FALSE	FALSE	FALSE	FALSE	FALSE
1	LMOD1	NP_036266.2	-4.581	3	0	0	3	0	-4.64025	-0.762143	0.775051	0.00042954	FALSE	FALSE	FALSE	FALSE	FALSE	FALSE	FALSE	FALSE	FALSE	FALSE
17	VEZF1	NP_009077.2	-4.581	3	0	0	3	0	-4.41775	-0.853364	0.616037	0.000704377	FALSE	FALSE	FALSE	FALSE	FALSE	FALSE	FALSE	FALSE	FALSE	FALSE
15	GABRA5	NP_000801.1	-4.5805	5	0	0	5	0	-8.38825	-1.14181	0.924982	2.31381e-06	TRUE	FALSE	TRUE	FALSE	FALSE	FALSE	FALSE	FALSE	FALSE	TRUE
8	PTK2	NP_001339627.1	-4.58	4	0	0	1	3	-2.977	-1.83775	1.97957	0.0878055	FALSE	FALSE	FALSE	FALSE	FALSE	FALSE	FALSE	FALSE	FALSE	FALSE
22	MYH9	NP_002464.1	-4.58	6	0	0	4	2	-7.5685	-4.57832	4.5104	0.0285903	FALSE	FALSE	FALSE	FALSE	FALSE	FALSE	TRUE	FALSE	FALSE	TRUE
8	RNF170	NP_001153695.1	-4.5785	1	0	0	1	0	-1.95875	-0.369821	0.318238	0.0103028	FALSE	FALSE	FALSE	FALSE	FALSE	FALSE	FALSE	FALSE	FALSE	FALSE
2	ADAM23	NP_003803.1	-4.5775	2	0	0	2	0	-4.4925	-1.20626	1.18786	0.00312733	FALSE	FALSE	FALSE	FALSE	FALSE	FALSE	FALSE	FALSE	FALSE	FALSE
12	ABCC9	NP_005682.2	-4.576	9	0	0	9	0	-14.2228	-2.89131	2.1137	8.88747e-08	TRUE	FALSE	TRUE	FALSE	FALSE	FALSE	TRUE	FALSE	FALSE	TRUE
13	SLITRK5	NP_056382.1	-4.576	4	0	0	3	1	-4.0405	-1.11874	1.66125	0.00686625	FALSE	FALSE	FALSE	FALSE	FALSE	FALSE	FALSE	FALSE	FALSE	FALSE
6	TFEB	NP_001161299.2	-4.575	2	0	0	2	0	-2.7465	-0.956124	0.92373	0.0220276	FALSE	FALSE	FALSE	FALSE	FALSE	FALSE	FALSE	FALSE	FALSE	FALSE
4	KLHL2	NP_001154993.1	-4.574	1	0	0	1	0	-1.95925	-1.2087	0.941686	0.0836683	FALSE	FALSE	FALSE	FALSE	FALSE	FALSE	FALSE	FALSE	FALSE	FALSE
12	LUM	NP_002336.1	-4.5735	2	0	0	1	1	-2.6955	-0.288028	0.339694	0.00120024	FALSE	FALSE	FALSE	FALSE	FALSE	FALSE	FALSE	FALSE	FALSE	FALSE
19	ZNF146	NP_001093108.1	-4.572	2	0	0	2	0	-1.70425	-0.381464	0.244502	0.0130205	FALSE	FALSE	FALSE	FALSE	FALSE	FALSE	FALSE	FALSE	FALSE	FALSE
6	UBE2J1	NP_057105.2	-4.5715	1	0	0	1	0	-2.03625	-0.668628	0.570249	0.0274857	FALSE	FALSE	FALSE	FALSE	FALSE	FALSE	FALSE	FALSE	FALSE	FALSE
X	ZNF711	NP_068838.3	-4.5715	1	0	0	1	0	-1.96325	-0.969616	0.655296	0.0520417	FALSE	FALSE	FALSE	FALSE	FALSE	FALSE	TRUE	FALSE	FALSE	TRUE
12	LGR5	NP_003658.1	-4.571	2	0	0	2	0	-2.9975	-0.629155	0.931253	0.00532823	FALSE	FALSE	FALSE	FALSE	FALSE	FALSE	FALSE	FALSE	FALSE	FALSE
6	RNF8	NP_003949.1	-4.5705	2	0	0	2	0	-3.674	-0.917484	0.782291	0.00395164	FALSE	FALSE	FALSE	FALSE	FALSE	FALSE	FALSE	FALSE	FALSE	FALSE
X	FAM50A	NP_004690.1	-4.5705	3	0	0	3	0	-5.61175	-0.829784	0.457513	6.12695e-05	FALSE	FALSE	FALSE	FALSE	FALSE	FALSE	FALSE	FALSE	FALSE	FALSE
11	PLAAT4	NP_004576.2	-4.5695	2	0	0	2	0	-3.5585	-0.288555	0.343905	0.000117278	FALSE	FALSE	FALSE	FALSE	FALSE	FALSE	FALSE	FALSE	FALSE	FALSE
3	CNTN3	NP_065923.1	-4.569	3	0	0	3	0	-4.45725	-1.4576	1.60151	0.0077353	FALSE	FALSE	FALSE	FALSE	FALSE	FALSE	FALSE	FALSE	FALSE	FALSE
X	ARHGAP36	NP_659404.2	-4.568	1	0	0	1	0	-1.94825	-0.748221	0.630412	0.0411148	FALSE	FALSE	FALSE	FALSE	FALSE	FALSE	FALSE	FALSE	FALSE	FALSE
19	LMNB2	NP_116126.3	-4.5665	7	0	0	5	2	-9.323	-1.06785	1.75931	2.29721e-07	TRUE	FALSE	TRUE	FALSE	FALSE	FALSE	TRUE	FALSE	FALSE	TRUE
7	COL1A2	NP_000080.2	-4.5655	2	0	0	1	1	-2.3875	-2.89572	2.53569	0.300702	FALSE	FALSE	FALSE	FALSE	FALSE	FALSE	FALSE	FALSE	FALSE	FALSE
19	PRR12	NP_065770.1	-4.565	4	0	0	2	2	-3.683	-2.70466	5.18564	0.202464	FALSE	FALSE	FALSE	FALSE	FALSE	FALSE	TRUE	TRUE	FALSE	TRUE
10	BTAF1	NP_003963.1	-4.5645	3	0	0	3	0	-4.76025	-3.41534	2.91321	0.069935	FALSE	FALSE	FALSE	FALSE	FALSE	FALSE	FALSE	FALSE	FALSE	FALSE
5	ITK	NP_005537.3	-4.5635	2	0	0	2	0	-3.3765	-0.787736	0.802192	0.00469651	FALSE	FALSE	FALSE	FALSE	FALSE	FALSE	FALSE	FALSE	FALSE	FALSE
5	HDAC3	NP_003874.2	-4.56	3	0	0	3	0	-5.37675	-1.03183	0.677904	0.00022953	FALSE	FALSE	FALSE	FALSE	FALSE	FALSE	FALSE	FALSE	FALSE	FALSE
8	RDH10	NP_742034.1	-4.5585	2	0	0	2	0	-2.9995	-0.916202	0.802819	0.0119941	FALSE	FALSE	FALSE	FALSE	FALSE	FALSE	FALSE	FALSE	FALSE	FALSE
2	BCS1L	NP_004319.1	-4.5585	1	0	0	1	0	-1.93875	-0.839676	0.877414	0.0619656	FALSE	FALSE	FALSE	FALSE	FALSE	FALSE	TRUE	FALSE	FALSE	TRUE
20	KCNG1	NP_002228.2	-4.558	1	0	0	1	0	-1.93825	-1.5808	1.33163	0.153822	FALSE	FALSE	FALSE	FALSE	FALSE	FALSE	FALSE	FALSE	FALSE	FALSE
2	TRIB2	NP_067675.1	-4.5575	1	0	0	1	0	-1.99625	-0.672225	0.596841	0.031034	FALSE	FALSE	FALSE	FALSE	FALSE	FALSE	FALSE	FALSE	FALSE	FALSE
13	CUL4A	NP_001008895.1	-4.5565	3	0	0	2	1	-3.67975	-1.43905	1.35688	0.0166503	FALSE	FALSE	FALSE	FALSE	FALSE	FALSE	FALSE	FALSE	FALSE	FALSE
4	HNRNPDL	NP_112740.1	-4.554	2	0	0	2	0	-3.6995	-0.343909	0.397796	0.000232786	FALSE	FALSE	FALSE	FALSE	FALSE	TRUE	FALSE	FALSE	FALSE	FALSE
11	GANAB	NP_938149.2	-4.5525	3	0	0	2	1	-3.50025	-1.39237	1.31588	0.0206812	FALSE	FALSE	FALSE	FALSE	FALSE	FALSE	FALSE	FALSE	FALSE	FALSE
2	PPIG	NP_004783.2	-4.5525	3	0	0	3	0	-4.86025	-1.03129	0.943261	0.000838084	FALSE	FALSE	FALSE	FALSE	FALSE	FALSE	FALSE	FALSE	FALSE	FALSE
17	KRT27	NP_853515.2	-4.55	3	0	0	1	2	-2.36175	-0.387508	0.77686	0.00445898	FALSE	FALSE	FALSE	FALSE	FALSE	FALSE	FALSE	FALSE	FALSE	FALSE
8	FBXO32	NP_478136.1	-4.549	1	0	0	1	0	-1.92925	-0.781384	0.689797	0.0462333	FALSE	FALSE	FALSE	FALSE	FALSE	FALSE	FALSE	FALSE	FALSE	FALSE
2	EPHA4	NP_004429.1	-4.547	7	0	0	6	1	-8.49575	-1.66052	1.80092	2.60436e-05	FALSE	FALSE	FALSE	FALSE	FALSE	FALSE	FALSE	FALSE	FALSE	FALSE
10	PRPF18	NP_003666.1	-4.546	3	0	0	3	0	-4.71575	-0.884758	0.615998	0.000453744	FALSE	FALSE	FALSE	FALSE	FALSE	FALSE	FALSE	FALSE	FALSE	FALSE
11	PRRG4	NP_076986.1	-4.546	1	0	0	1	0	-1.92625	-0.331788	0.306634	0.00917418	FALSE	FALSE	FALSE	FALSE	FALSE	FALSE	FALSE	FALSE	FALSE	FALSE
17	AKAP10	NP_009133.2	-4.5435	1	0	0	1	0	-1.92375	-0.860158	0.88016	0.0629854	FALSE	FALSE	FALSE	FALSE	FALSE	FALSE	FALSE	FALSE	FALSE	FALSE
7	PAXIP1	NP_031375.3	-4.5435	2	0	0	1	1	-2.7605	-2.18839	1.88284	0.125961	FALSE	FALSE	FALSE	FALSE	FALSE	FALSE	FALSE	FALSE	FALSE	FALSE
18	LMAN1	NP_005561.1	-4.543	2	0	0	1	1	-2.014	-0.590536	0.861854	0.0301346	FALSE	FALSE	FALSE	FALSE	FALSE	FALSE	FALSE	FALSE	FALSE	FALSE
X	TXLNG	NP_060830.2	-4.543	4	0	0	3	1	-4.913	-0.435154	0.395098	2.73638e-05	FALSE	FALSE	FALSE	FALSE	FALSE	FALSE	FALSE	FALSE	FALSE	FALSE
7	PHTF2	NP_001120829.1	-4.5425	3	0	0	3	0	-4.56225	-1.17618	1.14358	0.00251227	FALSE	FALSE	FALSE	FALSE	FALSE	FALSE	FALSE	FALSE	FALSE	FALSE
X	ATP11C	NP_001340741.2	-4.542	3	0	0	3	0	-3.90275	-1.3934	1.01753	0.00789036	FALSE	FALSE	FALSE	FALSE	FALSE	FALSE	FALSE	FALSE	FALSE	FALSE
20	SOX12	NP_008874.2	-4.5415	1	0	0	1	0	-1.92175	-0.685251	0.861712	0.0454644	FALSE	FALSE	FALSE	FALSE	FALSE	FALSE	FALSE	FALSE	FALSE	FALSE
5	GEMIN5	NP_056280.2	-4.541	2	0	0	2	0	-3.5955	-1.7882	2.49696	0.0554084	FALSE	FALSE	FALSE	FALSE	FALSE	FALSE	TRUE	FALSE	FALSE	TRUE
10	CCDC6	NP_005427.2	-4.5405	3	0	0	2	1	-4.63075	-1.04209	0.8373	0.00109212	FALSE	FALSE	FALSE	FALSE	FALSE	FALSE	FALSE	FALSE	FALSE	FALSE
1	NEK7	NP_598001.1	-4.5405	2	0	0	2	0	-3.4915	-0.583882	0.502602	0.00142977	FALSE	FALSE	FALSE	FALSE	FALSE	FALSE	FALSE	FALSE	FALSE	FALSE
17	RARA	NP_000955.1	-4.538	3	0	0	3	0	-5.09225	-1.20369	0.889448	0.000830544	FALSE	FALSE	FALSE	FALSE	FALSE	FALSE	FALSE	FALSE	FALSE	FALSE
19	SIGLEC8	NP_055257.2	-4.5375	2	0	0	1	1	-2.3385	-0.271753	0.613194	0.00257699	FALSE	FALSE	FALSE	FALSE	FALSE	FALSE	FALSE	FALSE	FALSE	FALSE
2	COL5A2	NP_000384.2	-4.5375	6	0	0	3	3	-5.026	-2.36981	2.40452	0.021388	FALSE	FALSE	FALSE	FALSE	FALSE	FALSE	FALSE	FALSE	FALSE	FALSE
1	AHCTF1	NP_056261.4	-4.537	3	0	0	1	2	-2.96475	-2.27468	2.91539	0.199687	FALSE	FALSE	FALSE	FALSE	FALSE	FALSE	FALSE	FALSE	FALSE	FALSE
6	RPL10A	NP_009035.3	-4.537	2	0	0	2	0	-3.6075	-0.490985	0.456607	0.000675971	FALSE	FALSE	FALSE	FALSE	FALSE	FALSE	FALSE	FALSE	FALSE	FALSE
1	WDTC1	NP_001263181.1	-4.537	2	0	0	2	0	-3.162	-1.75591	1.42777	0.0492734	FALSE	FALSE	FALSE	FALSE	FALSE	FALSE	FALSE	FALSE	FALSE	FALSE
14	TNFAIP2	NP_006282.2	-4.5365	3	0	0	1	2	-3.16925	-1.19967	1.74831	0.0290643	FALSE	FALSE	FALSE	FALSE	FALSE	FALSE	FALSE	FALSE	FALSE	FALSE
3	YEATS2	NP_060493.3	-4.5335	4	0	0	3	1	-4.701	-1.90346	2.3515	0.0167875	FALSE	FALSE	FALSE	FALSE	FALSE	FALSE	FALSE	FALSE	FALSE	FALSE
19	GPR4	NP_005273.1	-4.5335	2	0	0	2	0	-3.0125	-0.856075	0.917402	0.0116001	FALSE	FALSE	FALSE	FALSE	FALSE	FALSE	FALSE	FALSE	FALSE	FALSE
11	ETS1	NP_001137292.1	-4.531	1	0	0	1	0	-1.91125	-0.915998	0.814411	0.0620835	FALSE	FALSE	FALSE	FALSE	FALSE	FALSE	FALSE	FALSE	FALSE	FALSE
1	ZZZ3	NP_056349.1	-4.53	3	0	0	2	1	-3.96725	-1.34635	1.40355	0.0108241	FALSE	FALSE	FALSE	FALSE	FALSE	FALSE	FALSE	FALSE	FALSE	FALSE
19	GNA11	NP_002058.2	-4.5295	3	0	0	3	0	-4.59675	-1.11843	1.08476	0.0019685	FALSE	FALSE	FALSE	FALSE	FALSE	FALSE	TRUE	FALSE	FALSE	TRUE
20	CSE1L	NP_001307.2	-4.529	5	0	0	3	2	-5.73175	-1.56506	1.4681	0.00131738	FALSE	FALSE	FALSE	FALSE	FALSE	FALSE	FALSE	FALSE	FALSE	FALSE
3	CACNA2D2	NP_006021.2	-4.529	3	0	0	1	2	-2.89975	-2.27049	2.35312	0.168343	FALSE	FALSE	FALSE	FALSE	FALSE	FALSE	FALSE	FALSE	FALSE	FALSE
12	C2CD5	NP_001273104.1	-4.5285	2	0	0	1	1	-2.482	-1.71511	1.70487	0.129212	FALSE	FALSE	FALSE	FALSE	FALSE	FALSE	FALSE	FALSE	FALSE	FALSE
1	ZMYM4	NP_005086.2	-4.528	3	0	0	3	0	-1.17825	-2.20624	1.85622	0.485953	FALSE	FALSE	FALSE	FALSE	FALSE	FALSE	FALSE	FALSE	FALSE	FALSE
2	MAPRE3	NP_001289979.1	-4.528	1	0	0	1	0	-1.90825	-0.613807	0.484255	0.0263121	FALSE	FALSE	FALSE	FALSE	FALSE	FALSE	FALSE	FALSE	FALSE	FALSE
11	MTMR2	NP_057240.3	-4.5255	1	0	0	1	0	-1.90575	-0.87423	0.834032	0.0635058	FALSE	FALSE	FALSE	FALSE	FALSE	FALSE	FALSE	FALSE	FALSE	FALSE
16	ZNF768	NP_078947.3	-4.5245	2	0	0	1	1	-2.186	-0.795017	0.908727	0.0391728	FALSE	FALSE	FALSE	FALSE	FALSE	FALSE	FALSE	FALSE	FALSE	FALSE
1	NR5A2	NP_995582.1	-4.5245	1	0	0	1	0	-1.90475	-0.902269	0.800714	0.060872	FALSE	FALSE	FALSE	FALSE	FALSE	FALSE	FALSE	FALSE	FALSE	FALSE
14	NRXN3	NP_004787.2	-4.5245	4	0	0	2	2	-4.9565	-1.8385	2.0707	0.0100767	FALSE	FALSE	FALSE	FALSE	FALSE	FALSE	TRUE	FALSE	FALSE	TRUE
16	GLG1	NP_036333.2	-4.5245	5	0	0	4	1	-6.43925	-1.69471	2.15094	0.000990229	FALSE	FALSE	FALSE	FALSE	FALSE	FALSE	FALSE	FALSE	FALSE	FALSE
7	CBX3	NP_009207.2	-4.522	2	0	0	2	0	-3.8045	-0.326651	0.246511	0.000120752	FALSE	FALSE	FALSE	FALSE	FALSE	FALSE	FALSE	FALSE	FALSE	FALSE
17	DHX40	NP_078888.4	-4.52	1	0	0	1	0	-1.90025	-1.39934	0.988395	0.111506	FALSE	FALSE	FALSE	FALSE	FALSE	FALSE	FALSE	FALSE	FALSE	FALSE
15	LEO1	NP_620147.1	-4.519	2	0	0	2	0	-3.5915	-0.992576	0.974573	0.00670595	FALSE	FALSE	FALSE	FALSE	FALSE	FALSE	FALSE	FALSE	FALSE	FALSE
3	ATP2C1	NP_055197.2	-4.5175	2	0	0	2	0	-3.38	-1.51267	1.36931	0.0274983	FALSE	FALSE	FALSE	FALSE	FALSE	FALSE	FALSE	FALSE	FALSE	FALSE
12	NOP2	NP_001245238.1	-4.517	2	0	0	1	1	-2.483	-0.923028	1.20302	0.0358896	FALSE	FALSE	FALSE	FALSE	FALSE	FALSE	FALSE	FALSE	FALSE	FALSE
1	RRAGC	NP_071440.1	-4.5165	1	0	0	1	0	-1.89675	-0.708464	0.512073	0.0323554	FALSE	FALSE	FALSE	FALSE	FALSE	FALSE	FALSE	FALSE	FALSE	FALSE
6	PEX3	NP_003621.1	-4.516	2	0	0	2	0	-3.432	-0.604436	0.54323	0.00180068	FALSE	FALSE	FALSE	FALSE	FALSE	FALSE	TRUE	FALSE	FALSE	TRUE
X	EFNB1	NP_004420.1	-4.516	2	0	0	2	0	-3.006	-0.503612	0.430092	0.0024109	FALSE	FALSE	FALSE	FALSE	FALSE	FALSE	TRUE	FALSE	FALSE	TRUE
16	CNEP1R1	NP_694993.2	-4.5155	1	0	0	1	0	-2.36125	-0.31696	0.199286	0.00266233	FALSE	FALSE	FALSE	FALSE	FALSE	FALSE	FALSE	FALSE	FALSE	FALSE
3	NLGN1	NP_055747.1	-4.515	2	0	0	1	1	-2.6175	-0.920259	0.829328	0.0224362	FALSE	FALSE	FALSE	FALSE	FALSE	FALSE	FALSE	FALSE	FALSE	FALSE
5	SCAMP1	NP_004857.4	-4.5145	2	0	0	1	1	-2.5195	-0.400242	0.446271	0.00413944	FALSE	FALSE	FALSE	FALSE	FALSE	FALSE	FALSE	FALSE	FALSE	FALSE
7	PRKAR1B	NP_001158233.1	-4.514	7	0	0	6	1	-9.71525	-0.727082	0.944943	4.30596e-09	TRUE	FALSE	TRUE	FALSE	FALSE	FALSE	TRUE	TRUE	TRUE	TRUE
15	EMC7	NP_064539.1	-4.5125	1	0	0	1	0	-1.89275	-0.418862	0.372814	0.0146337	FALSE	FALSE	FALSE	FALSE	FALSE	FALSE	FALSE	FALSE	FALSE	FALSE
9	RIGI	NP_055129.2	-4.5125	4	0	0	3	1	-4.792	-1.13492	1.26821	0.00170688	FALSE	FALSE	FALSE	FALSE	FALSE	FALSE	TRUE	FALSE	FALSE	TRUE
10	PSAP	NP_002769.1	-4.5115	3	0	0	3	0	-3.92775	-0.68189	1.01644	0.0011803	FALSE	FALSE	FALSE	FALSE	FALSE	FALSE	TRUE	FALSE	FALSE	TRUE
4	POLR2B	NP_000929.1	-4.5115	2	0	0	2	0	-3.5975	-3.46143	1.98551	0.0815374	FALSE	FALSE	FALSE	FALSE	FALSE	FALSE	FALSE	FALSE	FALSE	FALSE
3	THRB	NP_000452.2	-4.5095	1	0	0	1	0	-1.88975	-1.09333	0.719682	0.0654068	FALSE	FALSE	FALSE	FALSE	FALSE	FALSE	FALSE	FALSE	FALSE	TRUE
12	EEA1	NP_003557.3	-4.5095	8	0	0	5	3	-8.019	-1.95652	1.91298	0.000133381	FALSE	FALSE	FALSE	FALSE	FALSE	FALSE	FALSE	FALSE	FALSE	FALSE
13	FLT1	NP_002010.2	-4.5095	4	0	0	1	3	-3.3655	-2.0058	2.18565	0.0828896	FALSE	FALSE	FALSE	FALSE	FALSE	FALSE	FALSE	FALSE	FALSE	FALSE
2	OLA1	NP_037473.3	-4.509	3	0	0	3	0	-4.95025	-0.571043	0.53443	8.2156e-05	FALSE	FALSE	FALSE	FALSE	FALSE	FALSE	FALSE	FALSE	FALSE	FALSE
11	RRAS2	NP_036382.2	-4.5075	4	0	0	3	1	-5.2215	-0.390607	0.344186	7.03754e-06	FALSE	FALSE	FALSE	FALSE	FALSE	FALSE	TRUE	FALSE	FALSE	TRUE
11	PDE2A	NP_001230713.1	-4.5075	2	0	0	2	0	-3.3165	-1.86266	1.27128	0.0330275	FALSE	FALSE	FALSE	FALSE	FALSE	FALSE	FALSE	FALSE	FALSE	FALSE
19	RAB3A	NP_002857.1	-4.5075	2	0	0	2	0	-2.991	-0.447528	0.480669	0.00189636	FALSE	FALSE	FALSE	FALSE	FALSE	FALSE	FALSE	FALSE	FALSE	FALSE
14	KLHL28	NP_001295041.1	-4.507	2	0	0	2	0	-3.8545	-1.08952	1.02891	0.00552809	FALSE	FALSE	FALSE	FALSE	FALSE	FALSE	FALSE	FALSE	FALSE	FALSE
11	TBCEL	NP_001123519.1	-4.506	2	0	0	2	0	-3.4795	-0.808461	0.700112	0.00371868	FALSE	FALSE	FALSE	FALSE	FALSE	FALSE	FALSE	FALSE	FALSE	FALSE
8	DERL1	NP_077271.1	-4.506	3	0	0	1	2	-3.28575	-0.354541	0.439916	0.000538781	FALSE	FALSE	FALSE	FALSE	FALSE	FALSE	FALSE	FALSE	FALSE	FALSE
12	CTDSP2	NP_005721.3	-4.5055	2	0	0	2	0	-2.815	-0.413609	0.385601	0.00226032	FALSE	FALSE	FALSE	FALSE	FALSE	FALSE	FALSE	FALSE	FALSE	FALSE
5	ARRDC3	NP_065852.1	-4.5055	2	0	0	1	1	-2.557	-0.550722	0.596906	0.0077506	FALSE	FALSE	FALSE	FALSE	FALSE	FALSE	FALSE	FALSE	FALSE	FALSE
4	GALNT7	NP_059119.2	-4.5045	1	0	0	1	0	-1.88475	-0.953436	0.856212	0.0741769	FALSE	FALSE	FALSE	FALSE	FALSE	FALSE	FALSE	FALSE	FALSE	FALSE
17	RAB5C	NP_001238968.1	-4.504	4	0	0	3	1	-5.6115	-0.399447	0.36764	3.63345e-06	FALSE	FALSE	FALSE	FALSE	FALSE	FALSE	FALSE	FALSE	FALSE	FALSE
15	NPTN	NP_036560.1	-4.504	2	0	0	1	1	-2.362	-0.596006	0.555887	0.0129591	FALSE	FALSE	FALSE	FALSE	FALSE	FALSE	FALSE	FALSE	FALSE	FALSE
2	SOS1	NP_005624.2	-4.5035	10	0	0	8	2	-10.2435	-2.02495	2.05213	5.87445e-06	FALSE	FALSE	FALSE	FALSE	FALSE	FALSE	TRUE	FALSE	FALSE	TRUE
5	FAF2	NP_055428.1	-4.5025	2	0	0	2	0	-3.3385	-1.06781	0.839498	0.0093721	FALSE	FALSE	FALSE	FALSE	FALSE	FALSE	FALSE	FALSE	FALSE	FALSE
19	BICRA	NP_056526.3	-4.502	5	0	0	1	4	-3.11725	-1.68321	3.82999	0.0898216	FALSE	FALSE	FALSE	FALSE	FALSE	FALSE	TRUE	FALSE	FALSE	TRUE
3	ARPC4	NP_001185709.1	-4.5015	3	0	0	3	0	-4.58075	-0.487934	0.388747	0.000101527	FALSE	FALSE	FALSE	FALSE	FALSE	FALSE	TRUE	FALSE	FALSE	TRUE
3	RARB	NP_000956.2	-4.501	4	0	0	4	0	-6.027	-0.838112	0.635712	3.88474e-05	FALSE	FALSE	FALSE	FALSE	FALSE	FALSE	TRUE	FALSE	FALSE	TRUE
1	GRIK3	NP_000822.2	-4.5	6	0	0	2	4	-3.86175	-1.57626	1.99872	0.0261723	FALSE	FALSE	FALSE	FALSE	FALSE	FALSE	FALSE	FALSE	FALSE	FALSE
20	ARFGEF2	NP_006411.2	-4.4995	5	0	0	5	0	-6.14025	-2.73065	2.66563	0.0102938	FALSE	FALSE	FALSE	FALSE	FALSE	FALSE	TRUE	FALSE	FALSE	TRUE
4	SLC4A4	NP_001091954.1	-4.4975	3	0	0	3	0	-4.63125	-1.91369	1.63189	0.0113033	FALSE	FALSE	FALSE	FALSE	FALSE	FALSE	TRUE	FALSE	FALSE	TRUE
13	DGKH	NP_821077.1	-4.496	3	0	0	2	1	-5.179	-1.95414	2.02374	0.00797732	FALSE	FALSE	FALSE	FALSE	FALSE	FALSE	FALSE	FALSE	FALSE	FALSE
17	POLR2A	NP_000928.1	-4.496	6	0	0	5	1	-10.071	-5.08899	4.39541	0.00325741	FALSE	FALSE	FALSE	FALSE	FALSE	TRUE	TRUE	FALSE	FALSE	TRUE
1	RER1	NP_008964.3	-4.4955	1	0	0	1	0	-1.82625	-0.424867	0.360245	0.0161002	FALSE	FALSE	FALSE	FALSE	FALSE	FALSE	FALSE	FALSE	FALSE	FALSE
6	SLC22A23	NP_056297.1	-4.4955	4	0	0	3	1	-4.553	-1.02709	1.34314	0.00166176	FALSE	FALSE	FALSE	FALSE	FALSE	FALSE	FALSE	FALSE	FALSE	FALSE
11	DCUN1D5	NP_115675.1	-4.4935	1	0	0	1	0	-1.64125	-0.506498	0.365062	0.0271143	FALSE	FALSE	FALSE	FALSE	FALSE	FALSE	FALSE	FALSE	FALSE	FALSE
9	PHF2	NP_005383.3	-4.493	3	0	0	3	0	-4.16775	-1.82799	1.8475	0.0213992	FALSE	FALSE	FALSE	FALSE	FALSE	FALSE	FALSE	FALSE	FALSE	FALSE
10	PRKCQ	NP_001310194.1	-4.4925	2	0	0	1	1	-1.9655	-0.789011	0.793907	0.0484416	FALSE	FALSE	FALSE	FALSE	FALSE	FALSE	FALSE	FALSE	FALSE	FALSE
12	STK38L	NP_055815.1	-4.4925	1	0	0	1	0	-1.87275	-0.724411	0.449029	0.0304592	FALSE	FALSE	FALSE	FALSE	FALSE	FALSE	FALSE	FALSE	FALSE	FALSE
1	IL10	NP_000563.1	-4.4925	1	0	0	1	0	-1.87275	-0.24924	0.260858	0.00594074	FALSE	FALSE	FALSE	FALSE	FALSE	FALSE	FALSE	FALSE	FALSE	FALSE
1	WDR77	NP_001303991.1	-4.4915	2	0	0	2	0	-3.1215	-0.558812	0.606178	0.00281342	FALSE	FALSE	FALSE	FALSE	FALSE	FALSE	FALSE	FALSE	FALSE	FALSE
22	SMARCB1	NP_003064.2	-4.4915	6	0	0	6	0	-10.3955	-0.907033	0.558656	9.48134e-09	TRUE	FALSE	TRUE	FALSE	FALSE	FALSE	TRUE	TRUE	TRUE	TRUE
1	COP1	NP_071902.2	-4.4915	2	0	0	1	1	-2.5745	-0.980747	0.77082	0.0234037	FALSE	FALSE	FALSE	FALSE	FALSE	FALSE	FALSE	FALSE	FALSE	FALSE
19	C3	NP_000055.2	-4.491	5	0	0	4	1	-5.94325	-3.2052	3.70584	0.0351796	FALSE	FALSE	FALSE	FALSE	FALSE	FALSE	FALSE	FALSE	FALSE	FALSE
12	LRIG3	NP_700356.2	-4.4905	5	0	0	4	1	-4.78925	-1.28078	1.51167	0.00271637	FALSE	FALSE	FALSE	FALSE	FALSE	FALSE	FALSE	FALSE	FALSE	FALSE
22	CBX7	NP_783640.1	-4.49	1	0	0	1	0	-1.87025	-0.481691	0.53403	0.022133	FALSE	FALSE	FALSE	FALSE	FALSE	FALSE	FALSE	FALSE	FALSE	FALSE
8	XKR6	NP_775954.2	-4.4895	5	0	0	2	3	-3.2	-0.840426	1.25707	0.0096423	FALSE	FALSE	FALSE	FALSE	FALSE	FALSE	FALSE	FALSE	FALSE	FALSE
1	PDE4B	NP_002591.2	-4.488	1	0	0	1	0	-1.86825	-1.19651	1.08061	0.113747	FALSE	FALSE	FALSE	FALSE	FALSE	FALSE	FALSE	FALSE	FALSE	FALSE
6	ELOVL5	NP_068586.1	-4.488	2	0	0	2	0	-2.8165	-0.519715	0.463264	0.00390553	FALSE	FALSE	FALSE	FALSE	FALSE	FALSE	FALSE	FALSE	FALSE	FALSE
8	BNIP3L	NP_004322.1	-4.488	2	0	0	1	1	-2.3795	-0.334521	0.328448	0.00355149	FALSE	FALSE	FALSE	FALSE	FALSE	FALSE	FALSE	FALSE	FALSE	FALSE
20	PANK2	NP_705902.2	-4.4875	2	0	0	1	1	-2.5955	-0.470968	0.690502	0.00513187	FALSE	FALSE	FALSE	FALSE	FALSE	FALSE	FALSE	FALSE	FALSE	FALSE
17	CAMKK1	NP_757343.2	-4.4875	1	0	0	1	0	-2.42625	-0.493213	0.601543	0.0089036	FALSE	FALSE	FALSE	FALSE	FALSE	FALSE	FALSE	FALSE	FALSE	FALSE
10	CHUK	NP_001269.3	-4.4875	1	0	0	1	0	-1.86775	-1.3904	1.1324	0.132564	FALSE	FALSE	FALSE	FALSE	FALSE	FALSE	TRUE	FALSE	FALSE	TRUE
4	USP46	NP_073743.2	-4.4855	2	0	0	2	0	-3.1795	-0.769382	0.565248	0.00467144	FALSE	FALSE	FALSE	FALSE	FALSE	FALSE	FALSE	FALSE	FALSE	FALSE
3	PPARG	NP_056953.2	-4.485	1	0	0	1	0	-1.86525	-0.896337	0.699364	0.0563368	FALSE	FALSE	FALSE	FALSE	FALSE	FALSE	FALSE	FALSE	FALSE	FALSE
7	ELMO1	NP_001193409.1	-4.485	5	0	0	3	2	-4.58075	-1.33951	1.46688	0.00471267	FALSE	FALSE	FALSE	FALSE	FALSE	FALSE	FALSE	FALSE	FALSE	FALSE
16	SPNS1	NP_001135920.1	-4.4845	1	0	0	1	0	-2.13825	-0.864995	1.08653	0.0523378	FALSE	FALSE	FALSE	FALSE	FALSE	FALSE	FALSE	FALSE	FALSE	FALSE
7	DMTF1	NP_001135799.1	-4.4835	4	0	0	2	2	-4.25575	-1.09259	1.02504	0.0030074	FALSE	FALSE	FALSE	FALSE	FALSE	FALSE	FALSE	FALSE	FALSE	FALSE
11	PRDX5	NP_036226.2	-4.4815	1	0	0	1	0	-2.08925	-0.278775	0.262213	0.00481077	FALSE	FALSE	FALSE	FALSE	FALSE	FALSE	FALSE	FALSE	FALSE	FALSE
9	NELFB	NP_056271.3	-4.481	3	0	0	1	2	-2.65575	-0.836535	1.38546	0.0253555	FALSE	FALSE	FALSE	FALSE	FALSE	FALSE	FALSE	FALSE	FALSE	FALSE
5	LARP1	NP_056130.2	-4.4805	3	0	0	3	0	-5.74375	-1.90066	1.97381	0.0034113	FALSE	FALSE	FALSE	FALSE	FALSE	FALSE	FALSE	FALSE	FALSE	FALSE
5	RAI14	NP_001138997.1	-4.48	1	0	0	1	0	-1.86025	-1.47695	1.44502	0.187742	FALSE	FALSE	FALSE	FALSE	FALSE	FALSE	FALSE	FALSE	FALSE	FALSE
14	NEMF	NP_004704.3	-4.4795	2	0	0	1	1	-2.4935	-1.40876	1.66767	0.0957257	FALSE	FALSE	FALSE	FALSE	FALSE	FALSE	FALSE	FALSE	FALSE	FALSE
X	USP11	NP_001358001.1	-4.479	5	0	0	4	1	-6.03025	-1.83219	1.22754	0.000773727	FALSE	FALSE	FALSE	FALSE	FALSE	FALSE	FALSE	FALSE	FALSE	FALSE
2	KLHL29	NP_443152.1	-4.478	2	0	0	1	1	-2.31925	-1.47771	2.23934	0.151682	FALSE	FALSE	FALSE	FALSE	FALSE	FALSE	FALSE	FALSE	FALSE	FALSE
12	MIP	NP_036196.1	-4.478	4	0	0	4	0	-5.4125	-0.418958	0.451582	6.92295e-06	FALSE	FALSE	FALSE	FALSE	FALSE	FALSE	FALSE	FALSE	FALSE	FALSE
5	SAR1B	NP_001028675.1	-4.478	1	0	0	1	0	-1.85825	-0.276114	0.277936	0.00759403	FALSE	FALSE	FALSE	FALSE	FALSE	FALSE	FALSE	FALSE	FALSE	FALSE
12	TPCN1	NP_001137291.1	-4.4765	2	0	0	2	0	-2.7675	-1.56892	1.72036	0.086443	FALSE	FALSE	FALSE	FALSE	FALSE	FALSE	FALSE	FALSE	FALSE	FALSE
19	HPN	NP_001371062.1	-4.4755	1	0	0	1	0	-2.06225	-0.928373	1.07337	0.0651278	FALSE	FALSE	FALSE	FALSE	FALSE	FALSE	FALSE	FALSE	FALSE	FALSE
5	DOCK2	NP_004937.1	-4.4755	5	0	0	5	0	-5.90575	-3.02468	3.15461	0.0241132	FALSE	FALSE	FALSE	FALSE	FALSE	FALSE	FALSE	FALSE	FALSE	FALSE
12	ING4	NP_001121054.1	-4.474	2	0	0	1	1	-2.3775	-0.501708	0.48652	0.00873677	FALSE	FALSE	FALSE	FALSE	FALSE	FALSE	FALSE	FALSE	FALSE	FALSE
12	CSRNP2	NP_110436.1	-4.473	1	0	0	1	0	-1.85325	-1.02604	0.926646	0.0920092	FALSE	FALSE	FALSE	FALSE	FALSE	FALSE	FALSE	FALSE	FALSE	FALSE
X	IDS	NP_006114.1	-4.473	1	0	0	1	0	-1.85325	-0.486577	0.356011	0.0176827	FALSE	FALSE	FALSE	FALSE	FALSE	FALSE	TRUE	FALSE	FALSE	TRUE
5	TRIM23	NP_150230.1	-4.4725	1	0	0	1	0	-1.85275	-1.05867	0.908584	0.0952371	FALSE	FALSE	FALSE	FALSE	FALSE	FALSE	FALSE	FALSE	FALSE	FALSE
10	ACTR1A	NP_005727.1	-4.471	3	0	0	3	0	-4.08975	-0.985651	0.800742	0.00236361	FALSE	FALSE	FALSE	FALSE	FALSE	FALSE	FALSE	FALSE	FALSE	FALSE
7	EPHB4	NP_004435.3	-4.471	7	0	0	3	4	-5.47925	-1.81262	2.54758	0.00599887	FALSE	FALSE	FALSE	FALSE	FALSE	FALSE	TRUE	FALSE	FALSE	TRUE
7	CPSF4	NP_006684.1	-4.4705	1	0	0	1	0	-1.85075	-0.774978	0.466107	0.0343105	FALSE	FALSE	FALSE	FALSE	FALSE	FALSE	FALSE	FALSE	FALSE	FALSE
17	LLGL1	NP_004131.4	-4.4705	4	0	0	3	1	-4.254	-1.86172	2.70865	0.0305877	FALSE	FALSE	FALSE	FALSE	FALSE	FALSE	FALSE	FALSE	FALSE	FALSE
3	PRICKLE2	NP_942559.1	-4.47	1	0	0	1	0	-1.85025	-1.4418	1.83863	0.217472	FALSE	FALSE	FALSE	FALSE	FALSE	FALSE	FALSE	FALSE	FALSE	FALSE
22	TRMT2A	NP_892029.2	-4.47	1	0	0	1	0	0	-0.08768	0.261986	1	FALSE	FALSE	FALSE	FALSE	FALSE	FALSE	FALSE	FALSE	FALSE	FALSE
19	ZNF439	NP_001335647.1	-4.4695	2	0	0	2	0	-2.9255	-0.544971	0.736268	0.00415978	FALSE	FALSE	FALSE	FALSE	FALSE	FALSE	FALSE	FALSE	FALSE	FALSE
14	MAX	NP_002373.3	-4.4695	3	0	0	3	0	-5.38975	-0.365811	0.298445	5.27514e-06	FALSE	FALSE	FALSE	FALSE	FALSE	FALSE	FALSE	FALSE	FALSE	FALSE
20	PRPF6	NP_036601.2	-4.468	4	0	0	4	0	-4.9575	-2.61309	2.15773	0.0216296	FALSE	FALSE	FALSE	FALSE	FALSE	FALSE	FALSE	FALSE	FALSE	FALSE
21	SLC37A1	NP_001307466.1	-4.4675	3	0	0	1	2	-3.19075	-0.90302	1.07521	0.0101532	FALSE	FALSE	FALSE	FALSE	FALSE	FALSE	FALSE	FALSE	FALSE	FALSE
12	DHX37	NP_116045.2	-4.4675	2	0	0	1	1	-2.434	-2.38295	2.78422	0.293878	FALSE	FALSE	FALSE	FALSE	FALSE	FALSE	TRUE	FALSE	FALSE	TRUE
9	BICD2	NP_001003800.1	-4.467	9	0	0	8	1	-13.2218	-1.82809	2.20728	1.06408e-08	TRUE	FALSE	TRUE	FALSE	FALSE	FALSE	TRUE	FALSE	FALSE	TRUE
2	CAD	NP_004332.2	-4.467	14	0	0	6	8	-11.361	-4.53704	4.96513	0.000886187	FALSE	FALSE	FALSE	FALSE	FALSE	FALSE	TRUE	FALSE	FALSE	TRUE
20	CSTF1	NP_001028693.1	-4.4665	2	0	0	2	0	-2.8365	-1.22274	0.915135	0.0270574	FALSE	FALSE	FALSE	FALSE	FALSE	FALSE	FALSE	FALSE	FALSE	FALSE
4	INTS12	NP_001135943.1	-4.466	1	0	0	1	0	-1.84625	-0.750862	0.699498	0.0517784	FALSE	FALSE	FALSE	FALSE	FALSE	FALSE	FALSE	FALSE	FALSE	FALSE
12	NELL2	NP_001138579.1	-4.4655	2	0	0	1	1	-2.7175	-1.18063	1.56729	0.0508504	FALSE	FALSE	FALSE	FALSE	FALSE	FALSE	FALSE	FALSE	FALSE	FALSE
2	FN1	NP_001293061.2	-4.4655	6	0	0	5	1	-5.968	-2.23515	2.4419	0.00596222	FALSE	FALSE	FALSE	FALSE	FALSE	FALSE	TRUE	FALSE	FALSE	TRUE
15	AP3B2	NP_004635.2	-4.4655	5	0	0	4	1	-7.86525	-1.96249	2.30329	0.000274786	FALSE	FALSE	FALSE	FALSE	FALSE	FALSE	TRUE	FALSE	FALSE	TRUE
3	KBTBD8	NP_115894.2	-4.4645	2	0	0	1	1	-1.9665	-0.666499	0.745241	0.0378114	FALSE	FALSE	FALSE	FALSE	FALSE	FALSE	FALSE	FALSE	FALSE	FALSE
1	PTGFR	NP_000950.1	-4.464	1	0	0	1	0	-1.84425	-0.496398	0.510965	0.0246791	FALSE	FALSE	FALSE	FALSE	FALSE	FALSE	FALSE	FALSE	FALSE	FALSE
16	ZCCHC14	NP_055959.2	-4.463	2	0	0	1	1	-2.6195	-1.4788	2.15265	0.0997605	FALSE	FALSE	FALSE	FALSE	FALSE	TRUE	FALSE	FALSE	FALSE	FALSE
11	EEF1G	NP_001395.1	-4.463	2	0	0	2	0	-3.352	-0.848925	0.798851	0.00586334	FALSE	FALSE	FALSE	FALSE	FALSE	FALSE	FALSE	FALSE	FALSE	FALSE
9	NPR2	NP_003986.2	-4.462	3	0	0	3	0	-3.68725	-2.19952	2.16282	0.0682299	FALSE	FALSE	FALSE	FALSE	FALSE	FALSE	TRUE	FALSE	FALSE	TRUE
5	EBF1	NP_874367.1	-4.4615	2	0	0	2	0	-3.2625	-1.14104	1.33437	0.0198405	FALSE	FALSE	FALSE	FALSE	FALSE	FALSE	FALSE	FALSE	FALSE	FALSE
X	ALAS2	NP_000023.2	-4.4605	1	0	0	1	0	-1.84075	-0.74801	0.429604	0.0310023	FALSE	FALSE	FALSE	FALSE	FALSE	FALSE	FALSE	FALSE	FALSE	FALSE
8	MMP16	NP_005932.2	-4.4605	1	0	0	1	0	-1.84075	-1.13618	0.87197	0.086773	FALSE	FALSE	FALSE	FALSE	FALSE	FALSE	FALSE	FALSE	FALSE	FALSE
X	TAF7L	NP_079161.3	-4.4595	1	0	0	1	0	-1.83975	-0.413949	0.335094	0.0159613	FALSE	FALSE	FALSE	FALSE	FALSE	FALSE	FALSE	FALSE	FALSE	FALSE
16	SLC6A2	NP_001034.1	-4.4595	1	0	0	1	0	-1.83975	-1.18982	1.22715	0.121752	FALSE	FALSE	FALSE	FALSE	FALSE	FALSE	FALSE	FALSE	FALSE	FALSE
13	FGF9	NP_002001.1	-4.459	1	0	0	1	0	-1.83925	-0.379061	0.28288	0.0123017	FALSE	FALSE	FALSE	FALSE	FALSE	FALSE	TRUE	FALSE	FALSE	TRUE
7	TNPO3	NP_036602.1	-4.4585	7	0	0	4	3	-7.25925	-1.57702	1.68056	0.000150728	FALSE	FALSE	FALSE	FALSE	FALSE	FALSE	FALSE	FALSE	FALSE	TRUE
X	MED14	NP_004220.2	-4.457	3	0	0	3	0	-5.04525	-2.27748	1.41532	0.00595113	FALSE	FALSE	FALSE	FALSE	FALSE	FALSE	FALSE	FALSE	FALSE	FALSE
3	ZXDC	NP_079388.3	-4.457	1	0	0	1	0	-2.52825	-1.06527	1.75897	0.0512893	FALSE	FALSE	FALSE	FALSE	FALSE	FALSE	FALSE	FALSE	FALSE	FALSE
4	SEPTIN11	NP_001293076.1	-4.456	1	0	0	1	0	-1.83625	-0.68596	0.617505	0.0425865	FALSE	FALSE	FALSE	FALSE	FALSE	FALSE	FALSE	FALSE	FALSE	FALSE
3	CASR	NP_001171536.2	-4.456	4	0	0	3	1	-4.635	-1.84208	1.63756	0.010503	FALSE	FALSE	FALSE	FALSE	FALSE	FALSE	FALSE	FALSE	FALSE	FALSE
16	ABCC11	NP_115972.2	-4.4555	5	0	0	3	2	-4.82825	-1.8164	2.38912	0.0121692	FALSE	FALSE	FALSE	FALSE	FALSE	FALSE	FALSE	FALSE	FALSE	FALSE
16	ZNF319	NP_065858.1	-4.4555	2	0	0	2	0	-0.83325	-0.856918	0.927947	0.279743	FALSE	FALSE	FALSE	FALSE	FALSE	FALSE	FALSE	FALSE	FALSE	FALSE
3	FNDC3B	NP_001128567.1	-4.4555	1	0	0	1	0	-1.83575	-1.81075	2.06633	0.291803	FALSE	FALSE	FALSE	FALSE	FALSE	FALSE	FALSE	FALSE	FALSE	FALSE
11	CTR9	NP_055448.1	-4.455	6	0	0	5	1	-8.803	-2.25854	1.82152	7.2026e-05	FALSE	FALSE	FALSE	FALSE	FALSE	FALSE	FALSE	FALSE	FALSE	FALSE
9	RASEF	NP_689786.2	-4.455	3	0	0	2	1	-3.36575	-1.06282	1.61882	0.0148348	FALSE	FALSE	FALSE	FALSE	FALSE	FALSE	FALSE	FALSE	FALSE	FALSE
14	HNRNPC	NP_004491.2	-4.455	1	0	0	1	0	-1.83525	-0.760265	0.515252	0.0379525	FALSE	FALSE	FALSE	FALSE	FALSE	FALSE	FALSE	FALSE	FALSE	FALSE
6	RTN4IP1	NP_116119.2	-4.4535	1	0	0	1	0	-1.83375	-0.446244	0.555042	0.0215172	FALSE	FALSE	FALSE	FALSE	FALSE	FALSE	TRUE	FALSE	FALSE	TRUE
13	INTS6	NP_036273.1	-4.453	1	0	0	1	0	-1.83325	-2.03679	1.41576	0.198153	FALSE	FALSE	FALSE	FALSE	FALSE	FALSE	FALSE	FALSE	FALSE	FALSE
15	ISL2	NP_665804.1	-4.4525	2	0	0	2	0	-2.6085	-0.676683	1.20302	0.0183255	FALSE	FALSE	FALSE	FALSE	FALSE	FALSE	FALSE	FALSE	FALSE	FALSE
19	HNRNPM	NP_005959.2	-4.452	1	0	0	1	0	-1.83225	-0.967537	1.36048	0.109165	FALSE	FALSE	FALSE	FALSE	FALSE	FALSE	FALSE	FALSE	FALSE	FALSE
10	DOCK1	NP_001371.2	-4.4515	8	0	0	8	0	-8.34	-3.33084	3.39196	0.00249081	FALSE	FALSE	FALSE	FALSE	FALSE	FALSE	FALSE	FALSE	FALSE	FALSE
5	SLC6A3	NP_001035.1	-4.4515	2	0	0	1	1	-2.353	-1.20211	1.34267	0.073155	FALSE	FALSE	FALSE	FALSE	FALSE	FALSE	TRUE	FALSE	FALSE	TRUE
2	KCNH7	NP_150375.2	-4.4515	3	0	0	3	0	-4.16875	-1.58304	1.26895	0.00936664	FALSE	FALSE	FALSE	FALSE	FALSE	FALSE	FALSE	FALSE	FALSE	FALSE
6	LATS1	NP_004681.1	-4.451	2	0	0	2	0	-2.735	-1.43022	1.36262	0.0602168	FALSE	FALSE	FALSE	FALSE	FALSE	FALSE	FALSE	FALSE	FALSE	FALSE
5	GRIA1	NP_001107655.1	-4.451	3	0	0	3	0	-4.98475	-1.86146	1.66612	0.00687748	FALSE	FALSE	FALSE	FALSE	FALSE	FALSE	TRUE	FALSE	FALSE	TRUE
3	SLC41A3	NP_001157947.1	-4.45	1	0	0	1	0	-1.83025	-0.480662	0.653639	0.0248699	FALSE	FALSE	FALSE	FALSE	FALSE	FALSE	FALSE	FALSE	FALSE	FALSE
14	ACTN1	NP_001123476.1	-4.4495	3	0	0	2	1	-3.45675	-1.37991	1.35677	0.0221426	FALSE	FALSE	FALSE	FALSE	FALSE	FALSE	FALSE	FALSE	FALSE	FALSE
18	ZNF236	NP_001293018.1	-4.4495	2	0	0	2	0	-2.9705	-3.95371	3.99802	0.449917	FALSE	FALSE	FALSE	FALSE	FALSE	FALSE	FALSE	FALSE	FALSE	FALSE
22	CACNA1I	NP_066919.2	-4.449	7	0	0	6	1	-9.21675	-4.21637	4.714	0.00549539	FALSE	FALSE	FALSE	FALSE	FALSE	FALSE	FALSE	FALSE	FALSE	FALSE
1	KCNT2	NP_940905.2	-4.449	9	0	0	9	0	-11.6293	-1.91015	1.69641	2.44275e-07	TRUE	FALSE	TRUE	FALSE	FALSE	FALSE	TRUE	FALSE	FALSE	TRUE
1	CAPN2	NP_001139540.1	-4.4475	2	0	0	1	1	-2.6495	-0.835857	1.29098	0.0205443	FALSE	FALSE	FALSE	FALSE	FALSE	FALSE	FALSE	FALSE	FALSE	FALSE
12	IPO8	NP_006381.2	-4.4455	3	0	0	1	2	-2.56825	-1.65198	1.64703	0.103049	FALSE	FALSE	FALSE	FALSE	FALSE	FALSE	TRUE	FALSE	FALSE	TRUE
X	INTS6L	NP_872346.3	-4.4455	1	0	0	1	0	-1.82575	-0.970196	0.644379	0.0597481	FALSE	FALSE	FALSE	FALSE	FALSE	FALSE	FALSE	FALSE	FALSE	FALSE
X	ATP7A	NP_000043.4	-4.445	2	0	0	2	0	-3.1305	-1.66163	1.34356	0.0428254	FALSE	FALSE	FALSE	FALSE	FALSE	FALSE	TRUE	FALSE	FALSE	TRUE
17	MYH2	NP_060004.3	-4.4435	3	0	0	3	0	-4.78375	-3.09862	3.40634	0.0826725	FALSE	FALSE	FALSE	FALSE	FALSE	FALSE	FALSE	FALSE	FALSE	FALSE
19	CLPTM1	NP_001285.1	-4.4415	2	0	0	1	1	-2.4835	-1.34267	1.44782	0.079568	FALSE	FALSE	FALSE	FALSE	FALSE	FALSE	FALSE	FALSE	FALSE	FALSE
2	PRPF40A	NP_060362.3	-4.441	5	0	0	2	3	-5.489	-1.32193	1.09875	0.000761132	FALSE	FALSE	FALSE	FALSE	FALSE	FALSE	FALSE	FALSE	FALSE	FALSE
16	ACSM1	NP_443188.2	-4.441	1	0	0	1	0	-2.12425	-0.77509	1.05849	0.0426561	FALSE	FALSE	FALSE	FALSE	FALSE	FALSE	FALSE	FALSE	FALSE	FALSE
8	PDP1	NP_060914.2	-4.44	1	0	0	1	0	-1.82025	-0.592249	0.668387	0.0372954	FALSE	FALSE	FALSE	FALSE	FALSE	FALSE	FALSE	FALSE	FALSE	FALSE
1	PROX1	NP_001257545.1	-4.4395	1	0	0	1	0	-2.7205	-1.77843	1.46163	0.0796036	FALSE	FALSE	FALSE	FALSE	FALSE	FALSE	FALSE	FALSE	FALSE	FALSE
1	GJA5	NP_005257.2	-4.439	2	0	0	1	1	-2.5625	-0.517917	0.551607	0.00682869	FALSE	FALSE	FALSE	FALSE	FALSE	FALSE	FALSE	FALSE	FALSE	FALSE
22	MED15	NP_001003891.1	-4.4375	4	0	0	4	0	-6.568	-1.09377	1.16117	5.59019e-05	FALSE	FALSE	FALSE	FALSE	FALSE	FALSE	FALSE	FALSE	FALSE	FALSE
6	OGFRL1	NP_078852.3	-4.4375	1	0	0	1	0	-2.17825	-0.430779	0.618374	0.00858932	FALSE	FALSE	FALSE	FALSE	FALSE	FALSE	FALSE	FALSE	FALSE	FALSE
16	ZC3H7A	NP_054872.2	-4.437	3	0	0	2	1	-3.43075	-1.75022	1.6164	0.0414568	FALSE	FALSE	FALSE	FALSE	FALSE	FALSE	FALSE	FALSE	FALSE	FALSE
14	CDKN3	NP_005183.2	-4.437	1	0	0	1	0	-1.81725	-0.310554	0.251007	0.00941411	FALSE	FALSE	FALSE	FALSE	FALSE	FALSE	FALSE	FALSE	FALSE	FALSE
6	ATG5	NP_004840.1	-4.4365	3	0	0	3	0	-3.75575	-0.529657	0.411477	0.000588868	FALSE	FALSE	FALSE	FALSE	FALSE	FALSE	FALSE	FALSE	FALSE	FALSE
14	KCNH5	NP_647479.2	-4.436	4	0	0	4	0	-5.1745	-1.3918	1.26635	0.00171686	FALSE	FALSE	FALSE	FALSE	FALSE	FALSE	TRUE	FALSE	FALSE	TRUE
X	WNK3	NP_065973.2	-4.4345	2	0	0	1	1	-2.54	-1.58847	1.03859	0.0555875	FALSE	FALSE	FALSE	FALSE	FALSE	FALSE	TRUE	FALSE	FALSE	TRUE
14	EIF5	NP_001960.2	-4.4335	1	0	0	1	0	-2.00125	-0.747826	0.77953	0.0411581	FALSE	FALSE	FALSE	FALSE	FALSE	FALSE	FALSE	FALSE	FALSE	FALSE
1	EYA3	NP_001981.2	-4.4325	1	0	0	1	0	-1.81275	-0.933719	0.813521	0.0749463	FALSE	FALSE	FALSE	FALSE	FALSE	FALSE	FALSE	FALSE	FALSE	FALSE
17	SLC4A1	NP_000333.1	-4.4305	4	0	0	4	0	-5.259	-1.5214	1.91982	0.00291335	FALSE	FALSE	FALSE	FALSE	FALSE	FALSE	TRUE	FALSE	FALSE	TRUE
2	UGP2	NP_006750.3	-4.43	3	0	0	3	0	-4.07725	-0.809485	0.712852	0.00133731	FALSE	FALSE	FALSE	FALSE	FALSE	FALSE	TRUE	FALSE	FALSE	TRUE
8	TAF2	NP_003175.2	-4.429	1	0	0	1	0	-1.80925	-1.75874	1.60606	0.245897	FALSE	FALSE	FALSE	FALSE	FALSE	FALSE	TRUE	FALSE	FALSE	TRUE
22	SEC14L3	NP_001244308.1	-4.429	2	0	0	2	0	-1.31425	-0.182949	0.385821	0.0150773	FALSE	FALSE	FALSE	FALSE	FALSE	FALSE	FALSE	FALSE	FALSE	FALSE
1	POGZ	NP_055915.2	-4.4285	9	0	0	8	1	-11.6043	-2.52718	2.47988	3.32468e-06	FALSE	FALSE	FALSE	FALSE	FALSE	FALSE	TRUE	TRUE	FALSE	TRUE
10	HERC4	NP_071362.1	-4.4285	1	0	0	1	0	-1.80875	-1.90429	1.32354	0.191282	FALSE	FALSE	FALSE	FALSE	FALSE	FALSE	FALSE	FALSE	FALSE	FALSE
X	SYP	NP_003170.1	-4.428	1	0	0	1	0	-1.80825	-0.342946	0.285024	0.0123121	FALSE	FALSE	FALSE	FALSE	FALSE	FALSE	TRUE	FALSE	FALSE	TRUE
19	AP1M1	NP_115882.1	-4.4265	2	0	0	1	1	-2.3275	-1.1329	1.16562	0.0637667	FALSE	FALSE	FALSE	FALSE	FALSE	FALSE	FALSE	FALSE	FALSE	FALSE
11	OSBP	NP_002547.1	-4.426	3	0	0	3	0	-4.64325	-1.62562	1.34438	0.00574614	FALSE	FALSE	FALSE	FALSE	FALSE	FALSE	FALSE	FALSE	FALSE	FALSE
16	SOCS1	NP_003736.1	-4.425	1	0	0	1	0	-1.80525	-0.360007	0.7505	0.0199998	FALSE	FALSE	FALSE	FALSE	FALSE	FALSE	FALSE	FALSE	FALSE	FALSE
X	ABCB7	NP_004290.2	-4.424	2	0	0	1	1	-3.19575	-1.24874	0.738527	0.0100386	FALSE	FALSE	FALSE	FALSE	FALSE	FALSE	TRUE	FALSE	FALSE	TRUE
10	PDE6C	NP_006195.3	-4.424	3	0	0	3	0	-3.95325	-1.12525	1.21	0.00627685	FALSE	FALSE	FALSE	FALSE	FALSE	FALSE	FALSE	FALSE	FALSE	FALSE
7	SLC4A2	NP_001186621.1	-4.423	4	0	0	1	3	-2.879	-2.22985	2.35122	0.162106	FALSE	FALSE	FALSE	FALSE	FALSE	FALSE	FALSE	FALSE	FALSE	FALSE
22	TNRC6B	NP_001155973.1	-4.4225	4	0	0	3	1	-5.006	-2.0565	2.47035	0.0152159	FALSE	FALSE	FALSE	FALSE	FALSE	FALSE	TRUE	FALSE	FALSE	TRUE
12	ABCD2	NP_005155.1	-4.4215	2	0	0	2	0	-3.1245	-0.930129	0.907898	0.0114049	FALSE	FALSE	FALSE	FALSE	FALSE	FALSE	FALSE	FALSE	FALSE	FALSE
8	PIWIL2	NP_001129193.1	-4.421	4	0	0	3	1	-4.4935	-0.974012	1.41567	0.0016662	FALSE	FALSE	FALSE	FALSE	FALSE	FALSE	FALSE	FALSE	FALSE	FALSE
3	CNOT10	NP_001243670.1	-4.42	1	0	0	1	0	-1.80025	-0.948545	1.01126	0.0939079	FALSE	FALSE	FALSE	FALSE	FALSE	FALSE	FALSE	FALSE	FALSE	FALSE
2	CYP27C1	NP_001001665.3	-4.419	6	0	0	6	0	-8.457	-0.673712	0.756719	4.72113e-08	TRUE	FALSE	TRUE	FALSE	FALSE	FALSE	FALSE	FALSE	FALSE	FALSE
3	PCCB	NP_000523.2	-4.4185	3	0	0	2	1	-3.5595	-0.512708	1.02218	0.000838235	FALSE	FALSE	FALSE	FALSE	FALSE	FALSE	TRUE	FALSE	FALSE	TRUE
17	ATAD5	NP_079133.3	-4.4185	4	0	0	4	0	-5.153	-1.82939	1.78399	0.00610338	FALSE	FALSE	FALSE	FALSE	FALSE	FALSE	FALSE	FALSE	FALSE	FALSE
1	HEATR1	NP_060542.4	-4.418	4	0	0	2	2	-4.698	-2.32218	3.36363	0.042888	FALSE	FALSE	FALSE	FALSE	FALSE	FALSE	FALSE	FALSE	FALSE	FALSE
X	SLC25A43	NP_660348.2	-4.4175	1	0	0	1	0	-1.79775	-0.429692	0.352616	0.0186729	FALSE	FALSE	FALSE	FALSE	FALSE	FALSE	FALSE	FALSE	FALSE	FALSE
1	ARID1A	NP_006006.3	-4.4175	12	0	0	10	2	-13.581	-3.00751	3.34136	6.34074e-07	TRUE	FALSE	TRUE	FALSE	FALSE	FALSE	TRUE	TRUE	TRUE	TRUE
11	PPP2R5B	NP_006235.1	-4.4165	1	0	0	1	0	-1.79675	-0.899251	0.981642	0.0863116	FALSE	FALSE	FALSE	FALSE	FALSE	FALSE	FALSE	FALSE	FALSE	TRUE
17	GFAP	NP_002046.1	-4.416	6	0	0	6	0	-8.76	-0.8019	0.943383	9.14144e-08	TRUE	FALSE	TRUE	FALSE	FALSE	FALSE	TRUE	FALSE	FALSE	TRUE
11	RELA	NP_068810.3	-4.414	2	0	0	2	0	-2.8815	-1.04603	0.889428	0.0195814	FALSE	FALSE	FALSE	FALSE	FALSE	FALSE	FALSE	FALSE	FALSE	FALSE
12	MED13L	NP_056150.1	-4.414	28	0	0	28	0	-29.492	-4.14827	3.80203	1.22214e-17	TRUE	FALSE	TRUE	FALSE	FALSE	FALSE	TRUE	TRUE	TRUE	TRUE
16	XPO6	NP_055986.1	-4.4135	3	0	0	2	1	-3.67175	-2.52082	2.15095	0.0777612	FALSE	FALSE	FALSE	FALSE	FALSE	FALSE	FALSE	FALSE	FALSE	FALSE
1	HDGF	NP_001306116.1	-4.413	1	0	0	1	0	-1.75125	-0.387735	0.352504	0.0156802	FALSE	FALSE	FALSE	FALSE	FALSE	FALSE	FALSE	FALSE	FALSE	FALSE
19	RASIP1	NP_060275.2	-4.413	4	0	0	2	2	-3.897	-2.0984	2.67983	0.0641508	FALSE	FALSE	FALSE	FALSE	FALSE	FALSE	FALSE	FALSE	FALSE	FALSE
4	TRIM2	NP_001123539.1	-4.4125	2	0	0	1	1	-2.2455	-1.60377	1.45583	0.124868	FALSE	FALSE	FALSE	FALSE	FALSE	FALSE	FALSE	FALSE	FALSE	FALSE
1	YARS1	NP_003671.1	-4.41	2	0	0	2	0	-3.534	-0.614993	0.561857	0.00155071	FALSE	FALSE	FALSE	FALSE	FALSE	FALSE	FALSE	FALSE	FALSE	FALSE
13	NALCN	NP_443099.1	-4.4095	14	0	0	12	2	-16.2915	-3.77377	3.40293	1.17472e-07	TRUE	FALSE	TRUE	FALSE	FALSE	FALSE	TRUE	FALSE	FALSE	TRUE
13	CCNA1	NP_003905.1	-4.4095	2	0	0	2	0	-2.735	-0.556299	0.576721	0.00571091	FALSE	FALSE	FALSE	FALSE	FALSE	FALSE	FALSE	FALSE	FALSE	FALSE
4	AADAT	NP_001273611.1	-4.409	3	0	0	2	1	-3.90875	-0.642587	0.701346	0.00109456	FALSE	FALSE	FALSE	FALSE	FALSE	FALSE	FALSE	FALSE	FALSE	FALSE
17	COPS3	NP_003644.2	-4.409	1	0	0	1	0	-1.78925	-0.748948	0.659477	0.0497108	FALSE	FALSE	FALSE	FALSE	FALSE	FALSE	FALSE	FALSE	FALSE	FALSE
8	NEFL	NP_006149.2	-4.4075	2	0	0	2	0					FALSE	FALSE	FALSE	FALSE	FALSE	FALSE	FALSE	FALSE	FALSE	FALSE
18	CXXC1	NP_001095124.1	-4.407	4	0	0	2	2	-4.554	-1.09478	1.08964	0.00187905	FALSE	FALSE	FALSE	FALSE	FALSE	FALSE	FALSE	FALSE	FALSE	FALSE
X	TBL1X	NP_005638.1	-4.407	1	0	0	1	0	-1.78725	-0.864626	0.663588	0.055145	FALSE	FALSE	FALSE	FALSE	FALSE	FALSE	FALSE	FALSE	FALSE	FALSE
5	RASA1	NP_002881.1	-4.407	1	0	0	1	0	-1.78725	-1.89918	1.58199	0.244893	FALSE	FALSE	FALSE	FALSE	FALSE	FALSE	TRUE	FALSE	FALSE	TRUE
20	EPB41L1	NP_036288.2	-4.406	1	0	0	1	0	-1.78625	-1.6499	1.37679	0.194887	FALSE	FALSE	FALSE	FALSE	FALSE	FALSE	TRUE	FALSE	FALSE	TRUE
16	BCAR1	NP_001164185.1	-4.405	4	0	0	2	2	-4.787	-0.909602	2.17393	0.00128699	FALSE	FALSE	FALSE	FALSE	FALSE	FALSE	FALSE	FALSE	FALSE	FALSE
22	MORC2	NP_001290185.1	-4.405	11	0	0	11	0	-16.1802	-2.34358	2.13611	4.79351e-10	TRUE	FALSE	TRUE	FALSE	FALSE	FALSE	TRUE	TRUE	TRUE	TRUE
7	ING3	NP_061944.2	-4.4045	1	0	0	1	0	-1.78475	-0.966391	0.657414	0.0638316	FALSE	FALSE	FALSE	FALSE	FALSE	FALSE	FALSE	FALSE	FALSE	FALSE
11	PKNOX2	NP_001369255.1	-4.4045	1	0	0	1	0	-2.06625	-0.746406	0.884142	0.0413332	FALSE	FALSE	FALSE	FALSE	FALSE	FALSE	FALSE	FALSE	FALSE	FALSE
1	LRRC8C	NP_115646.3	-4.404	2	0	0	2	0	-2.4415	-1.42805	1.30598	0.0791548	FALSE	FALSE	FALSE	FALSE	FALSE	FALSE	FALSE	FALSE	FALSE	FALSE
17	IGF2BP1	NP_006537.3	-4.4035	2	0	0	2	0	-2.944	-1.25987	1.0482	0.0276639	FALSE	FALSE	FALSE	FALSE	FALSE	FALSE	FALSE	FALSE	FALSE	FALSE
2	IL18RAP	NP_003844.1	-4.4035	3	0	0	1	2	-2.2155	-0.568705	0.80833	0.0193829	FALSE	FALSE	FALSE	FALSE	FALSE	FALSE	FALSE	FALSE	FALSE	FALSE
3	PDHB	NP_001166939.1	-4.403	1	0	0	1	0	-1.78325	-0.49025	0.51185	0.0268195	FALSE	FALSE	FALSE	FALSE	FALSE	FALSE	FALSE	FALSE	FALSE	FALSE
10	UROS	NP_000366.1	-4.4025	1	0	0	1	0	-1.78275	-0.307837	0.404265	0.0112916	FALSE	FALSE	FALSE	FALSE	FALSE	FALSE	TRUE	FALSE	FALSE	TRUE
4	SMARCA5	NP_003592.3	-4.402	2	0	0	2	0	-3.244	-2.28462	1.38102	0.047101	FALSE	FALSE	FALSE	FALSE	FALSE	FALSE	FALSE	FALSE	FALSE	FALSE
9	TEK	NP_000450.3	-4.402	3	0	0	1	2	-2.49525	-1.80951	1.92898	0.150918	FALSE	FALSE	FALSE	FALSE	FALSE	FALSE	TRUE	FALSE	FALSE	TRUE
2	ITGA6	NP_000201.2	-4.4015	4	0	0	4	0	-4.6585	-1.67759	1.8065	0.00963849	FALSE	FALSE	FALSE	FALSE	FALSE	FALSE	TRUE	FALSE	FALSE	TRUE
22	SOX10	NP_008872.1	-4.4005	2	0	0	1	1	-2.0605	-1.24313	1.22275	0.106683	FALSE	FALSE	FALSE	FALSE	FALSE	FALSE	TRUE	TRUE	FALSE	TRUE
5	C5orf63	NP_001157951.1	-4.4	1	0	0	1	0	-1.78025	-0.166433	0.105726	0.00227401	FALSE	FALSE	FALSE	FALSE	FALSE	FALSE	FALSE	FALSE	FALSE	FALSE
2	CTNNA2	NP_001158355.1	-4.3985	8	0	0	6	2	-9.842	-1.77591	1.79286	3.73531e-06	FALSE	FALSE	FALSE	FALSE	FALSE	FALSE	TRUE	FALSE	FALSE	TRUE
5	STC2	NP_003705.1	-4.3985	1	0	0	1	0	-1.77875	-0.43041	0.530419	0.0221059	FALSE	FALSE	FALSE	FALSE	FALSE	FALSE	FALSE	FALSE	FALSE	FALSE
19	MATK	NP_002369.2	-4.397	3	0	0	2	1	-3.20725	-0.66021	0.737673	0.00383709	FALSE	FALSE	FALSE	FALSE	FALSE	FALSE	FALSE	FALSE	FALSE	FALSE
3	RHO	NP_000530.1	-4.397	3	0	0	1	2	-2.60825	-0.433633	0.705348	0.00477695	FALSE	FALSE	FALSE	FALSE	FALSE	FALSE	FALSE	FALSE	FALSE	FALSE
19	SLC27A1	NP_940982.1	-4.396	2	0	0	1	1	-2.5915	-0.790546	1.48149	0.0256327	FALSE	FALSE	FALSE	FALSE	FALSE	FALSE	FALSE	FALSE	FALSE	FALSE
X	TLR7	NP_057646.1	-4.396	2	0	0	2	0	-2.943	-1.32738	0.869317	0.0224695	FALSE	FALSE	FALSE	FALSE	FALSE	FALSE	FALSE	FALSE	FALSE	FALSE
10	TIAL1	NP_001029097.1	-4.396	1	0	0	1	0	-1.77625	-0.82864	0.504406	0.0440483	FALSE	FALSE	FALSE	FALSE	FALSE	FALSE	FALSE	FALSE	FALSE	FALSE
19	LRRC4B	NP_001073926.1	-4.3955	1	0	0	1	0	-1.77575	-2.07205	1.97164	0.323304	FALSE	FALSE	FALSE	FALSE	FALSE	FALSE	FALSE	FALSE	FALSE	FALSE
X	POLA1	NP_058633.2	-4.3955	1	0	0	1	0	-1.77575	-1.79593	1.32182	0.200473	FALSE	FALSE	FALSE	TRUE	FALSE	FALSE	TRUE	FALSE	FALSE	TRUE
X	STAG2	NP_001036214.1	-4.395	1	0	0	1	0	-1.77525	-1.98781	0.943496	0.130843	FALSE	FALSE	FALSE	FALSE	FALSE	FALSE	TRUE	TRUE	FALSE	TRUE
12	PIWIL1	NP_001177900.1	-4.3935	2	0	0	2	0	-3.1265	-1.48426	1.37409	0.0358694	FALSE	FALSE	FALSE	FALSE	FALSE	FALSE	FALSE	FALSE	FALSE	FALSE
3	UBP1	NP_001121633.1	-4.3935	2	0	0	2	0	-2.5705	-1.03603	0.874712	0.0300461	FALSE	FALSE	FALSE	FALSE	FALSE	FALSE	FALSE	FALSE	FALSE	FALSE
1	KCNAB2	NP_003627.1	-4.393	2	0	0	2	0	-2.7875	-0.71921	0.719049	0.00996176	FALSE	FALSE	FALSE	FALSE	FALSE	FALSE	FALSE	FALSE	FALSE	FALSE
19	COMP	NP_000086.2	-4.3925	5	0	0	3	2	-4.85475	-1.64478	2.0716	0.00765785	FALSE	FALSE	FALSE	FALSE	FALSE	FALSE	TRUE	FALSE	FALSE	TRUE
12	POLR3B	NP_060552.4	-4.3925	11	0	0	9	2	-11.8403	-2.01379	1.96495	3.48512e-07	TRUE	FALSE	TRUE	FALSE	FALSE	FALSE	TRUE	FALSE	FALSE	TRUE
X	CNKSR2	NP_055742.2	-4.392	1	0	0	1	0	-1.77225	-1.39419	0.875352	0.108671	FALSE	FALSE	FALSE	FALSE	FALSE	FALSE	TRUE	TRUE	FALSE	TRUE
19	DAZAP1	NP_061832.2	-4.3915	1	0	0	1	0	-1.77175	-0.883432	0.653288	0.056287	FALSE	FALSE	FALSE	FALSE	FALSE	FALSE	FALSE	FALSE	FALSE	FALSE
6	QRSL1	NP_060762.3	-4.391	1	0	0	1	0	-1.77125	-0.660744	0.717782	0.0498489	FALSE	FALSE	FALSE	FALSE	FALSE	FALSE	FALSE	FALSE	FALSE	FALSE
9	PLAA	NP_001026859.1	-4.391	1	0	0	1	0	-1.77125	-0.813657	0.941261	0.0771059	FALSE	FALSE	FALSE	FALSE	FALSE	FALSE	TRUE	FALSE	FALSE	TRUE
2	GPR155	NP_001028217.1	-4.391	3	0	0	3	0	-3.80275	-1.16119	1.22859	0.00836875	FALSE	FALSE	FALSE	FALSE	FALSE	FALSE	FALSE	FALSE	FALSE	FALSE
19	ZNF460	NP_006626.3	-4.3905	2	0	0	1	1	-2.119	-0.791403	0.643617	0.0303439	FALSE	FALSE	FALSE	FALSE	FALSE	FALSE	FALSE	FALSE	FALSE	FALSE
19	ZNF358	NP_060553.4	-4.39	2	0	0	1	1	-2.215	-1.16631	1.13421	0.0728031	FALSE	FALSE	FALSE	FALSE	FALSE	FALSE	FALSE	FALSE	FALSE	FALSE
12	NAA25	NP_079229.2	-4.389	3	0	0	3	0	-4.47175	-1.87043	1.55423	0.0120956	FALSE	FALSE	FALSE	FALSE	FALSE	FALSE	FALSE	FALSE	FALSE	FALSE
11	FTH1	NP_002023.2	-4.3885	1	0	0	1	0	-1.76875	-0.192135	0.296405	0.00566356	FALSE	FALSE	FALSE	FALSE	FALSE	FALSE	FALSE	FALSE	FALSE	FALSE
12	LRTM2	NP_001034118.1	-4.3885	3	0	0	2	1	-3.40775	-0.567772	0.849674	0.00184625	FALSE	FALSE	FALSE	FALSE	FALSE	FALSE	FALSE	FALSE	FALSE	FALSE
8	EXT1	NP_000118.2	-4.3885	2	0	0	2	0	-3.279	-1.09243	1.28404	0.0169138	FALSE	FALSE	FALSE	FALSE	FALSE	FALSE	TRUE	FALSE	FALSE	TRUE
13	SLITRK1	NP_443142.1	-4.388	2	0	0	2	0	-3.088	-1.16394	1.36703	0.0269722	FALSE	FALSE	FALSE	FALSE	FALSE	FALSE	FALSE	FALSE	FALSE	FALSE
7	COPS6	NP_006824.2	-4.388	1	0	0	1	0	-1.76825	-0.648092	0.603893	0.0426726	FALSE	FALSE	FALSE	FALSE	FALSE	FALSE	FALSE	FALSE	FALSE	FALSE
17	FOXK2	NP_004505.2	-4.386	3	0	0	1	2	-1.91925	-0.964443	1.56588	0.104832	FALSE	FALSE	FALSE	FALSE	FALSE	FALSE	FALSE	FALSE	FALSE	FALSE
17	ITGB3	NP_000203.2	-4.386	3	0	0	2	1	-3.39425	-1.07406	1.54792	0.0150066	FALSE	FALSE	FALSE	FALSE	FALSE	FALSE	FALSE	FALSE	FALSE	FALSE
5	CAMK4	NP_001735.1	-4.385	4	0	0	4	0	-6.889	-0.655458	0.541932	2.36915e-06	TRUE	FALSE	TRUE	FALSE	FALSE	FALSE	FALSE	FALSE	FALSE	FALSE
18	TMX3	NP_061895.3	-4.3835	1	0	0	1	0	-1.76375	-0.587287	0.62856	0.0406564	FALSE	FALSE	FALSE	FALSE	FALSE	FALSE	FALSE	FALSE	FALSE	FALSE
19	SF3A2	NP_009096.2	-4.383	1	0	0	1	0	-1.76325	-0.832525	0.765882	0.0621694	FALSE	FALSE	FALSE	FALSE	FALSE	FALSE	FALSE	FALSE	FALSE	FALSE
2	EIPR1	NP_003301.1	-4.383	1	0	0	1	0	-1.76325	-0.710855	0.810396	0.059513	FALSE	FALSE	FALSE	FALSE	FALSE	FALSE	FALSE	FALSE	FALSE	FALSE
X	MBTPS2	NP_056968.1	-4.3825	1	0	0	1	0	-1.76275	-0.721634	0.457513	0.0346394	FALSE	FALSE	FALSE	FALSE	FALSE	FALSE	FALSE	FALSE	FALSE	FALSE
20	PCSK2	NP_002585.2	-4.3815	1	0	0	1	0	-1.76175	-1.53372	1.27532	0.178927	FALSE	FALSE	FALSE	FALSE	FALSE	FALSE	FALSE	FALSE	FALSE	FALSE
11	NELL1	NP_006148.2	-4.381	3	0	0	3	0	-3.98475	-1.02437	1.40023	0.0047872	FALSE	FALSE	FALSE	FALSE	FALSE	FALSE	FALSE	FALSE	FALSE	FALSE
2	ABCB11	NP_003733.2	-4.38	4	0	0	3	1	-4.802	-1.57943	2.11058	0.00726129	FALSE	FALSE	FALSE	FALSE	FALSE	FALSE	TRUE	FALSE	FALSE	TRUE
4	LSM6	NP_009011.1	-4.38	2	0	0	2	0	-3.5185	-0.172658	0.110924	5.3664e-05	FALSE	FALSE	FALSE	FALSE	FALSE	FALSE	FALSE	FALSE	FALSE	FALSE
10	GPR158	NP_065803.2	-4.38	2	0	0	1	1	-2.071	-1.71482	2.28573	0.257533	FALSE	FALSE	FALSE	FALSE	FALSE	FALSE	FALSE	FALSE	FALSE	FALSE
16	DHX38	NP_054722.2	-4.3795	2	0	0	1	1	-2.405	-1.46963	1.50546	0.105125	FALSE	FALSE	FALSE	FALSE	FALSE	FALSE	FALSE	FALSE	FALSE	FALSE
5	MAN2A1	NP_002363.2	-4.379	4	0	0	3	1	-4.468	-1.25414	1.54049	0.00434037	FALSE	FALSE	FALSE	FALSE	FALSE	FALSE	FALSE	FALSE	FALSE	FALSE
8	ARFGEF1	NP_006412.2	-4.3775	2	0	0	2	0	-2.822	-2.88124	2.16281	0.184991	FALSE	FALSE	FALSE	FALSE	FALSE	FALSE	TRUE	FALSE	FALSE	TRUE
14	EML1	NP_004425.2	-4.3775	1	0	0	1	0	-1.75775	-1.4244	1.3445	0.174972	FALSE	FALSE	FALSE	FALSE	FALSE	FALSE	FALSE	FALSE	FALSE	FALSE
13	FNDC3A	NP_001073141.1	-4.3775	3	0	0	2	1	-3.50625	-1.66118	1.82783	0.0400052	FALSE	FALSE	FALSE	FALSE	FALSE	FALSE	FALSE	FALSE	FALSE	FALSE
17	ANKRD13B	NP_689558.4	-4.3765	4	0	0	2	2	-3.919	-1.24266	1.56587	0.0103913	FALSE	FALSE	FALSE	FALSE	FALSE	FALSE	FALSE	FALSE	FALSE	FALSE
16	CDH11	NP_001788.2	-4.375	1	0	0	1	0	-1.75525	-1.25651	1.48693	0.158267	FALSE	FALSE	FALSE	FALSE	FALSE	FALSE	TRUE	FALSE	FALSE	TRUE
17	INPP5K	NP_057616.2	-4.3745	3	0	0	1	2	-3.14975	-0.574168	0.745271	0.00311782	FALSE	FALSE	FALSE	FALSE	FALSE	FALSE	TRUE	FALSE	FALSE	TRUE
12	SLC4A8	NP_001035049.1	-4.374	3	0	0	2	1	-3.85775	-2.04917	1.67448	0.0323016	FALSE	FALSE	FALSE	FALSE	FALSE	FALSE	FALSE	FALSE	FALSE	FALSE
12	CUX2	NP_056082.2	-4.373	5	0	0	4	1	-5.77325	-2.93239	3.16644	0.0255049	FALSE	FALSE	FALSE	FALSE	FALSE	FALSE	TRUE	FALSE	FALSE	TRUE
2	IWS1	NP_060439.2	-4.372	1	0	0	1	0	-1.75225	-0.942815	0.992439	0.0953792	FALSE	FALSE	FALSE	FALSE	FALSE	FALSE	FALSE	FALSE	FALSE	FALSE
15	LRRK1	NP_078928.3	-4.371	5	0	0	2	3	-4.02225	-3.31864	4.47479	0.239636	FALSE	FALSE	FALSE	FALSE	FALSE	FALSE	FALSE	FALSE	FALSE	FALSE
11	TTC17	NP_060729.2	-4.371	2	0	0	2	0	-2.9105	-1.67926	1.94204	0.0941106	FALSE	FALSE	FALSE	FALSE	FALSE	FALSE	FALSE	FALSE	FALSE	FALSE
1	PSMB4	NP_002787.2	-4.3705	1	0	0	1	0	-1.75075	-0.426052	0.559135	0.0236333	FALSE	FALSE	FALSE	FALSE	FALSE	FALSE	FALSE	FALSE	FALSE	FALSE
11	ZC3H12C	NP_203748.1	-4.37	2	0	0	2	0	-2.636	-1.30685	1.2579	0.0559495	FALSE	FALSE	FALSE	FALSE	FALSE	FALSE	FALSE	FALSE	FALSE	FALSE
10	HK1	NP_000179.2	-4.3685	12	0	0	11	1	-14.284	-2.07819	2.03232	4.49251e-09	TRUE	FALSE	TRUE	FALSE	FALSE	FALSE	TRUE	TRUE	TRUE	TRUE
14	ARID4A	NP_002883.3	-4.3665	10	0	0	7	3	-9.8885	-1.85742	1.84287	6.2219e-06	FALSE	FALSE	FALSE	FALSE	FALSE	FALSE	FALSE	FALSE	FALSE	FALSE
X	F9	NP_000124.1	-4.366	1	0	0	1	0	-1.74625	-0.412226	0.223346	0.0126735	FALSE	FALSE	FALSE	FALSE	FALSE	FALSE	FALSE	FALSE	FALSE	FALSE
1	RBM15	NP_073605.4	-4.3655	1	0	0	1	0	-2.00525	-2.02049	2.52744	0.317316	FALSE	FALSE	FALSE	FALSE	FALSE	FALSE	FALSE	FALSE	FALSE	FALSE
16	TRAF7	NP_115647.2	-4.365	25	0	0	23	2	-30.1547	-1.46386	1.50558	0	TRUE	FALSE	TRUE	FALSE	FALSE	FALSE	TRUE	TRUE	TRUE	TRUE
9	MFSD14B	NP_115947.2	-4.365	1	0	0	1	0	-1.74525	-0.640264	0.963682	0.0542233	FALSE	FALSE	FALSE	FALSE	FALSE	FALSE	FALSE	FALSE	FALSE	FALSE
X	MTM1	NP_000243.1	-4.365	1	0	0	1	0	-1.74525	-0.92757	0.517773	0.0490982	FALSE	FALSE	FALSE	FALSE	FALSE	FALSE	TRUE	FALSE	FALSE	TRUE
2	DYNC1I2	NP_001258714.1	-4.3645	3	0	0	3	0	-4.86175	-1.11126	1.00524	0.00112645	FALSE	FALSE	FALSE	FALSE	FALSE	FALSE	TRUE	FALSE	FALSE	TRUE
16	N4BP1	NP_694574.3	-4.3645	4	0	0	1	3	-3.1925	-1.35247	1.42711	0.0321907	FALSE	FALSE	FALSE	FALSE	FALSE	FALSE	FALSE	FALSE	FALSE	FALSE
9	NR4A3	NP_775292.1	-4.364	1	0	0	1	0	-1.74425	-0.924723	0.743375	0.0746104	FALSE	FALSE	FALSE	FALSE	FALSE	FALSE	FALSE	FALSE	FALSE	FALSE
5	IPO11	NP_001128251.1	-4.3635	1	0	0	1	0	-1.74375	-1.27441	1.45788	0.18224	FALSE	FALSE	FALSE	FALSE	FALSE	FALSE	FALSE	FALSE	FALSE	FALSE
X	PIGA	NP_002632.1	-4.3635	1	0	0	1	0	-1.74375	-0.734611	0.420433	0.0335102	FALSE	FALSE	FALSE	FALSE	FALSE	FALSE	TRUE	FALSE	FALSE	TRUE
3	TOP2B	NP_001317629.1	-4.363	3	0	0	1	2	-2.98875	-2.70566	2.07164	0.143629	FALSE	FALSE	FALSE	FALSE	FALSE	FALSE	FALSE	FALSE	FALSE	FALSE
5	LRRTM2	NP_056379.1	-4.3625	1	0	0	1	0	-1.74275	-1.00238	0.890142	0.101848	FALSE	FALSE	FALSE	FALSE	FALSE	FALSE	FALSE	FALSE	FALSE	FALSE
6	TCP1	NP_110379.2	-4.3625	1	0	0	1	0	-1.74275	-0.961383	0.882359	0.0876594	FALSE	FALSE	FALSE	FALSE	FALSE	FALSE	FALSE	FALSE	FALSE	FALSE
1	SLC35A3	NP_036375.1	-4.362	1	0	0	1	0	-1.74225	-0.483026	0.451673	0.0267586	FALSE	FALSE	FALSE	FALSE	FALSE	FALSE	FALSE	FALSE	FALSE	FALSE
19	DNMT1	NP_001124295.1	-4.3615	4	0	0	4	0	-5.7835	-4.17804	3.23276	0.0459521	FALSE	FALSE	FALSE	FALSE	FALSE	FALSE	FALSE	FALSE	FALSE	FALSE
4	ATP8A1	NP_006086.1	-4.3605	5	0	0	4	1	-5.54825	-1.79744	1.6497	0.0029329	FALSE	FALSE	FALSE	FALSE	FALSE	FALSE	FALSE	FALSE	FALSE	FALSE
3	ADCY5	NP_899200.1	-4.3605	11	0	0	9	2	-15.1052	-2.50651	2.60948	1.6126e-08	TRUE	FALSE	TRUE	FALSE	FALSE	FALSE	TRUE	TRUE	TRUE	TRUE
21	KCNE2	NP_751951.1	-4.36	1	0	0	1	0	-1.74025	-0.188835	0.214433	0.0045964	FALSE	FALSE	FALSE	FALSE	FALSE	FALSE	FALSE	FALSE	FALSE	FALSE
11	PAX6	NP_001355847.1	-4.3585	3	0	0	3	0	-4.21025	-1.146	0.881164	0.00289123	FALSE	FALSE	FALSE	FALSE	FALSE	FALSE	TRUE	FALSE	FALSE	TRUE
17	RAP1GAP2	NP_055900.4	-4.358	1	0	0	1	0	-1.73825	-1.15047	1.32245	0.152831	FALSE	FALSE	FALSE	FALSE	FALSE	FALSE	FALSE	FALSE	FALSE	FALSE
14	ERO1A	NP_055399.1	-4.358	1	0	0	1	0	-1.73825	-0.707244	0.608824	0.0523568	FALSE	FALSE	FALSE	FALSE	FALSE	FALSE	FALSE	FALSE	FALSE	FALSE
20	RBM39	NP_001229529.1	-4.3575	1	0	0	1	0	-2.01725	-1.73493	0.866449	0.0823545	FALSE	FALSE	FALSE	FALSE	FALSE	FALSE	FALSE	FALSE	FALSE	FALSE
1	SV2A	NP_001265648.1	-4.357	1	0	0	1	0	-1.73725	-0.333705	0.275184	0.0129599	FALSE	FALSE	FALSE	FALSE	FALSE	FALSE	FALSE	FALSE	FALSE	FALSE
17	UNK	NP_001073888.2	-4.357	3	0	0	3	0	-3.87825	-1.88501	1.87722	0.0342615	FALSE	FALSE	FALSE	FALSE	FALSE	FALSE	FALSE	FALSE	FALSE	FALSE
20	ERGIC3	NP_938408.1	-4.357	2	0	0	1	1	-2.2815	-0.738873	0.792947	0.0270632	FALSE	FALSE	FALSE	FALSE	FALSE	FALSE	FALSE	FALSE	FALSE	FALSE
18	SNRPD1	NP_008869.1	-4.357	1	0	0	1	0	-1.73725	-0.29255	0.193981	0.00852913	FALSE	FALSE	FALSE	FALSE	FALSE	FALSE	FALSE	FALSE	FALSE	FALSE
2	CYP26B1	NP_063938.1	-4.3565	2	0	0	2	0	-3.4735	-1.09321	1.3116	0.0132253	FALSE	FALSE	FALSE	FALSE	FALSE	FALSE	FALSE	FALSE	FALSE	FALSE
21	SCAF4	NP_065757.1	-4.3565	7	0	0	3	4	-5.46675	-1.75775	1.93139	0.00396857	FALSE	FALSE	FALSE	FALSE	FALSE	FALSE	TRUE	FALSE	FALSE	TRUE
15	FEM1B	NP_056137.1	-4.3565	2	0	0	2	0	-3.442	-1.39471	1.18868	0.0197118	FALSE	FALSE	FALSE	FALSE	FALSE	FALSE	FALSE	FALSE	FALSE	FALSE
10	GPAM	NP_065969.3	-4.356	2	0	0	2	0	-2.7015	-1.1748	1.27811	0.045378	FALSE	FALSE	FALSE	FALSE	FALSE	FALSE	FALSE	FALSE	FALSE	FALSE
4	SH3RF1	NP_065921.2	-4.356	2	0	0	1	1	-2.4345	-1.28397	1.65733	0.0885902	FALSE	FALSE	FALSE	FALSE	FALSE	FALSE	FALSE	FALSE	FALSE	FALSE
9	FSD1L	NP_001138785.1	-4.355	2	0	0	1	1	-2.24325	-0.660637	0.764956	0.0217708	FALSE	FALSE	FALSE	FALSE	FALSE	FALSE	FALSE	FALSE	FALSE	FALSE
2	CCNT2	NP_490595.1	-4.353	2	0	0	1	1	-2.2745	-1.02567	1.04583	0.0529414	FALSE	FALSE	FALSE	FALSE	FALSE	FALSE	FALSE	FALSE	FALSE	FALSE
9	MAPKAP1	NP_001006619.1	-4.3515	1	0	0	1	0	-1.12325	-0.680904	0.543268	0.12002	FALSE	FALSE	FALSE	FALSE	FALSE	FALSE	FALSE	FALSE	FALSE	FALSE
1	CDC73	NP_078805.3	-4.351	2	0	0	2	0	-2.963	-1.4052	0.958506	0.0279691	FALSE	FALSE	FALSE	FALSE	FALSE	FALSE	FALSE	FALSE	FALSE	FALSE
2	STK39	NP_037365.2	-4.3495	4	0	0	3	1	-4.24	-0.786412	0.575606	0.000777533	FALSE	FALSE	FALSE	FALSE	FALSE	FALSE	FALSE	FALSE	FALSE	FALSE
5	PPP2R2B	NP_858061.3	-4.347	4	0	0	2	2	-4.209	-0.724531	0.889256	0.000971626	FALSE	FALSE	FALSE	FALSE	FALSE	FALSE	FALSE	FALSE	FALSE	TRUE
1	DNAJC8	NP_055095.2	-4.346	1	0	0	1	0	-1.72625	-0.456618	0.379476	0.0220696	FALSE	FALSE	FALSE	FALSE	FALSE	FALSE	FALSE	FALSE	FALSE	FALSE
1	LMX1A	NP_001167540.1	-4.3455	1	0	0	1	0	-1.72575	-0.556936	0.490341	0.0330218	FALSE	FALSE	FALSE	FALSE	FALSE	FALSE	FALSE	FALSE	FALSE	FALSE
16	CX3CL1	NP_002987.1	-4.345	2	0	0	1	1	-1.73525	-0.483051	0.900912	0.0333948	FALSE	FALSE	FALSE	FALSE	FALSE	FALSE	FALSE	FALSE	FALSE	FALSE
1	ACTA1	NP_001091.1	-4.344	7	0	0	7	0	-8.11475	-1.54016	1.15514	1.8903e-05	FALSE	FALSE	FALSE	FALSE	FALSE	FALSE	TRUE	FALSE	FALSE	TRUE
2	TMEM131	NP_056163.1	-4.3435	1	0	0	1	0	-1.72375	-1.93951	2.32872	0.377181	FALSE	FALSE	FALSE	FALSE	FALSE	FALSE	FALSE	FALSE	FALSE	FALSE
5	TMED7	NP_861974.1	-4.343	1	0	0	1	0					FALSE	FALSE	FALSE	FALSE	FALSE	FALSE	FALSE	FALSE	FALSE	FALSE
1	DNAJB4	NP_001304028.1	-4.3425	2	0	0	2	0	-2.507	-0.471285	0.532932	0.00618833	FALSE	FALSE	FALSE	FALSE	FALSE	FALSE	FALSE	FALSE	FALSE	FALSE
10	HNRNPF	NP_001091674.1	-4.342	1	0	0	1	0	-1.72225	-1.08298	0.725644	0.0774772	FALSE	FALSE	FALSE	FALSE	FALSE	FALSE	FALSE	FALSE	FALSE	FALSE
10	SORCS3	NP_055793.1	-4.3415	4	0	0	1	3	-3.0695	-1.62944	1.81488	0.0652053	FALSE	FALSE	FALSE	FALSE	FALSE	FALSE	FALSE	FALSE	FALSE	FALSE
11	RNF214	NP_997226.2	-4.341	2	0	0	2	0	-4.1575	-0.911396	0.881149	0.00196235	FALSE	FALSE	FALSE	FALSE	FALSE	FALSE	FALSE	FALSE	FALSE	FALSE
10	RET	NP_066124.1	-4.3405	9	0	0	5	4	-8.95825	-2.28303	2.70808	0.000101317	FALSE	FALSE	FALSE	FALSE	FALSE	FALSE	TRUE	FALSE	FALSE	TRUE
12	CIT	NP_001193928.1	-4.34	4	0	0	4	0	-4.79	-3.40022	3.45407	0.100078	FALSE	FALSE	FALSE	FALSE	FALSE	FALSE	TRUE	FALSE	FALSE	TRUE
14	G2E3	NP_060239.2	-4.34	2	0	0	1	1	-2.41	-1.23445	1.00797	0.0520522	FALSE	FALSE	FALSE	FALSE	FALSE	FALSE	FALSE	FALSE	FALSE	FALSE
2	EPB41L5	NP_065960.2	-4.3395	4	0	0	3	1	-3.9695	-0.773913	0.942183	0.00149736	FALSE	FALSE	FALSE	FALSE	FALSE	FALSE	FALSE	FALSE	FALSE	FALSE
X	MAGEA11	NP_005357.2	-4.3395	1	0	0	1	0	-1.71975	-0.480938	0.264512	0.0175765	FALSE	FALSE	FALSE	FALSE	FALSE	FALSE	FALSE	FALSE	FALSE	FALSE
8	TNFRSF10B	NP_671716.2	-4.339	1	0	0	1	0	-1.71925	-0.386665	0.618022	0.0209156	FALSE	FALSE	FALSE	FALSE	FALSE	FALSE	FALSE	FALSE	FALSE	FALSE
4	PKD2	NP_000288.1	-4.3375	1	0	0	1	0	-1.71775	-1.08616	1.21107	0.134011	FALSE	FALSE	FALSE	FALSE	FALSE	FALSE	FALSE	FALSE	FALSE	FALSE
4	UGT8	NP_001309043.2	-4.3375	2	0	0	1	1	-2.3375	-0.835065	0.819991	0.0296742	FALSE	FALSE	FALSE	FALSE	FALSE	FALSE	FALSE	FALSE	FALSE	FALSE
21	MORC3	NP_056173.1	-4.337	1	0	0	1	0	-1.71725	-1.61196	1.58981	0.236253	FALSE	FALSE	FALSE	FALSE	FALSE	FALSE	FALSE	FALSE	FALSE	FALSE
19	SLC25A23	NP_077008.2	-4.337	2	0	0	2	0	-2.9925	-0.710367	0.756396	0.00735458	FALSE	FALSE	FALSE	FALSE	FALSE	FALSE	FALSE	FALSE	FALSE	FALSE
19	AURKC	NP_001015878.1	-4.3365	1	0	0	1	0	-1.90425	-0.50873	0.5914	0.023769	FALSE	FALSE	FALSE	FALSE	FALSE	FALSE	FALSE	FALSE	FALSE	FALSE
5	TMCO6	NP_001287909.1	-4.3355	4	0	0	3	1	-3.92325	-0.813856	0.959248	0.00195982	FALSE	FALSE	FALSE	FALSE	FALSE	FALSE	FALSE	FALSE	FALSE	FALSE
1	PUM1	NP_001018494.1	-4.335	4	0	0	4	0	-5.045	-2.51346	2.05938	0.0167477	FALSE	FALSE	FALSE	FALSE	FALSE	FALSE	FALSE	FALSE	FALSE	TRUE
20	VPS16	NP_072097.2	-4.334	2	0	0	2	0	-2.7025	-1.35071	1.75583	0.0735671	FALSE	FALSE	FALSE	FALSE	FALSE	FALSE	FALSE	FALSE	FALSE	FALSE
12	PTPRO	NP_109592.1	-4.334	2	0	0	2	0	-2.7555	-1.74335	2.00677	0.120058	FALSE	FALSE	FALSE	FALSE	FALSE	FALSE	FALSE	FALSE	FALSE	FALSE
5	SREK1	NP_001070667.1	-4.3325	2	0	0	2	0	-3.007	-1.05388	0.942784	0.0183177	FALSE	FALSE	FALSE	FALSE	FALSE	FALSE	FALSE	FALSE	FALSE	FALSE
X	GPM6B	NP_001001995.1	-4.3325	1	0	0	1	0	-1.71275	-0.374222	0.267866	0.0149195	FALSE	FALSE	FALSE	FALSE	FALSE	FALSE	FALSE	FALSE	FALSE	FALSE
6	TENT5A	NP_060103.2	-4.332	2	0	0	2	0	-3.0405	-0.850264	0.820916	0.010158	FALSE	FALSE	FALSE	FALSE	FALSE	FALSE	FALSE	FALSE	FALSE	FALSE
1	LRRC7	NP_001357714.1	-4.332	3	0	0	1	2	-2.98275	-3.02466	2.64465	0.212563	FALSE	FALSE	FALSE	FALSE	FALSE	FALSE	FALSE	FALSE	FALSE	FALSE
19	DIRAS1	NP_660156.1	-4.332	1	0	0	1	0	-1.71225	-0.504871	0.550761	0.0335624	FALSE	FALSE	FALSE	FALSE	FALSE	FALSE	FALSE	FALSE	FALSE	FALSE
9	PTCH1	NP_000255.2	-4.3315	7	0	0	3	4	-6.22025	-2.12585	2.68881	0.00390797	FALSE	FALSE	FALSE	FALSE	FALSE	FALSE	TRUE	TRUE	FALSE	TRUE
2	MGAT5	NP_002401.1	-4.3305	3	0	0	3	0	-3.59175	-1.23823	1.23184	0.013567	FALSE	FALSE	FALSE	FALSE	FALSE	FALSE	FALSE	FALSE	FALSE	FALSE
1	CHD1L	NP_004275.4	-4.3295	2	0	0	1	1	-2.7975	-0.74559	1.53179	0.0163304	FALSE	FALSE	FALSE	FALSE	FALSE	FALSE	FALSE	FALSE	FALSE	TRUE
16	PDPR	NP_060460.4	-4.3295	1	0	0	1	0	-1.70975	-1.14517	1.59687	0.174185	FALSE	FALSE	FALSE	FALSE	FALSE	FALSE	FALSE	FALSE	FALSE	FALSE
3	STT3B	NP_849193.1	-4.3275	1	0	0	1	0	-1.70775	-1.64096	1.17385	0.170819	FALSE	FALSE	FALSE	FALSE	FALSE	FALSE	TRUE	FALSE	FALSE	TRUE
10	FBH1	NP_116196.3	-4.3265	1	0	0	1	0	-1.70675	-1.92218	2.07503	0.347325	FALSE	FALSE	FALSE	FALSE	FALSE	FALSE	FALSE	FALSE	FALSE	FALSE
1	BCAR3	NP_001248337.1	-4.326	3	0	0	2	1	-2.70925	-1.05888	1.46264	0.0381838	FALSE	FALSE	FALSE	FALSE	FALSE	FALSE	FALSE	FALSE	FALSE	FALSE
11	TMEM135	NP_075069.3	-4.326	4	0	0	3	1	-5.09975	-0.628948	0.704999	8.57775e-05	FALSE	FALSE	FALSE	FALSE	FALSE	FALSE	TRUE	FALSE	FALSE	TRUE
12	PAWR	NP_002574.2	-4.3255	1	0	0	1	0	-1.70575	-0.558739	0.870091	0.0505737	FALSE	FALSE	FALSE	FALSE	FALSE	FALSE	FALSE	FALSE	FALSE	FALSE
21	CRYZL1	NP_665857.2	-4.3255	1	0	0	1	0	-1.70575	-0.462461	0.501402	0.0294288	FALSE	FALSE	FALSE	FALSE	FALSE	FALSE	FALSE	FALSE	FALSE	FALSE
3	RPN1	NP_002941.1	-4.325	3	0	0	2	1	-3.096	-0.776428	0.927178	0.00846213	FALSE	FALSE	FALSE	FALSE	FALSE	FALSE	FALSE	FALSE	FALSE	FALSE
5	DCTN4	NP_001129115.1	-4.3245	2	0	0	2	0	-2.7535	-0.816356	0.935548	0.0165205	FALSE	FALSE	FALSE	FALSE	FALSE	FALSE	FALSE	FALSE	FALSE	FALSE
19	CALR	NP_004334.1	-4.3245	2	0	0	2	0	-3.3315	-0.463877	0.554761	0.00130288	FALSE	FALSE	FALSE	FALSE	FALSE	FALSE	FALSE	FALSE	FALSE	FALSE
4	EPHA5	NP_004430.4	-4.324	5	0	0	3	2	-5.35975	-1.23989	1.67941	0.00109026	FALSE	FALSE	FALSE	FALSE	FALSE	FALSE	FALSE	FALSE	FALSE	FALSE
17	ERBB2	NP_004439.2	-4.3225	5	0	0	4	1	-6.12325	-2.3065	2.45981	0.00558722	FALSE	FALSE	FALSE	FALSE	FALSE	FALSE	FALSE	FALSE	FALSE	FALSE
7	SMARCD3	NP_001003801.1	-4.322	4	0	0	2	2	-4.086	-0.923656	1.0288	0.00229367	FALSE	FALSE	FALSE	FALSE	FALSE	FALSE	FALSE	FALSE	FALSE	FALSE
3	RAB6B	NP_057661.3	-4.3205	2	0	0	1	1	-2.126	-0.609278	0.438233	0.0163792	FALSE	FALSE	FALSE	FALSE	FALSE	FALSE	FALSE	FALSE	FALSE	FALSE
6	KLHDC3	NP_476502.1	-4.32	3	0	0	3	0	-4.39625	-1.19882	0.859502	0.00229097	FALSE	FALSE	FALSE	FALSE	FALSE	FALSE	FALSE	FALSE	FALSE	FALSE
1	GNAI3	NP_006487.1	-4.32	5	0	0	4	1	-5.36475	-0.570005	0.610441	2.42009e-05	FALSE	FALSE	FALSE	FALSE	FALSE	FALSE	TRUE	FALSE	FALSE	TRUE
16	SPIRE2	NP_115827.1	-4.32	3	0	0	1	2	-2.13825	-0.634128	2.01373	0.0183023	FALSE	FALSE	FALSE	FALSE	FALSE	FALSE	FALSE	FALSE	FALSE	FALSE
7	ELAPOR2	NP_001136221.1	-4.3195	3	0	0	2	1	-2.70975	-1.1912	1.78056	0.0573293	FALSE	FALSE	FALSE	FALSE	FALSE	FALSE	FALSE	FALSE	FALSE	FALSE
1	PKN2	NP_006247.1	-4.319	1	0	0	1	0	-2.6815	-1.6949	1.57992	0.0834441	FALSE	FALSE	FALSE	FALSE	FALSE	FALSE	FALSE	FALSE	FALSE	FALSE
19	ATP13A1	NP_065143.2	-4.3175	5	0	0	2	3	-4.87675	-1.71442	2.0285	0.00881973	FALSE	FALSE	FALSE	FALSE	FALSE	FALSE	FALSE	FALSE	FALSE	FALSE
11	STIM1	NP_003147.2	-4.316	3	0	0	3	0	-3.28075	-1.06908	1.09824	0.0144549	FALSE	FALSE	FALSE	FALSE	FALSE	FALSE	TRUE	FALSE	FALSE	TRUE
5	AFF4	NP_055238.1	-4.3155	4	0	0	4	0	-5.5775	-1.63585	1.53812	0.00199392	FALSE	FALSE	FALSE	FALSE	FALSE	FALSE	TRUE	FALSE	FALSE	TRUE
2	UGGT1	NP_064505.1	-4.315	5	0	0	2	3	-5.59325	-2.30529	2.42754	0.010597	FALSE	FALSE	FALSE	FALSE	FALSE	FALSE	FALSE	FALSE	FALSE	FALSE
8	DCAF13	NP_056235.5	-4.3145	3	0	0	3	0	-4.61275	-0.642633	0.843735	0.000216492	FALSE	FALSE	FALSE	FALSE	FALSE	FALSE	FALSE	FALSE	FALSE	FALSE
7	ACTR3B	NP_065178.1	-4.3135	2	0	0	2	0	-2.511	-0.872704	0.780172	0.022976	FALSE	FALSE	FALSE	FALSE	FALSE	FALSE	FALSE	FALSE	FALSE	FALSE
3	EPHA3	NP_005224.2	-4.3125	2	0	0	2	0	-2.5355	-1.25571	1.63919	0.0763122	FALSE	FALSE	FALSE	FALSE	FALSE	FALSE	FALSE	FALSE	FALSE	FALSE
17	CA10	NP_001076003.1	-4.3125	2	0	0	2	0	-3.1125	-0.462527	0.49267	0.00153974	FALSE	FALSE	FALSE	FALSE	FALSE	FALSE	FALSE	FALSE	FALSE	FALSE
20	JAG1	NP_000205.1	-4.312	2	0	0	2	0	-2.878	-2.56967	2.55616	0.210322	FALSE	FALSE	FALSE	FALSE	FALSE	FALSE	TRUE	FALSE	FALSE	TRUE
17	SPAG9	NP_001124000.1	-4.312	3	0	0	1	2	-2.99925	-2.43675	2.29817	0.161373	FALSE	FALSE	FALSE	FALSE	FALSE	FALSE	FALSE	FALSE	FALSE	FALSE
17	KPNA2	NP_001307540.1	-4.312	1	0	0	1	0	-1.69225	-0.586171	0.862695	0.0481406	FALSE	FALSE	FALSE	FALSE	FALSE	FALSE	FALSE	FALSE	FALSE	FALSE
3	ZMYND10	NP_056980.2	-4.312	3	0	0	1	2	-3.00725	-0.711488	0.834519	0.00700788	FALSE	FALSE	FALSE	FALSE	FALSE	FALSE	TRUE	FALSE	FALSE	TRUE
15	TUBGCP4	NP_001273343.1	-4.3115	5	0	0	5	0	-6.35725	-1.09792	1.14221	7.49551e-05	FALSE	FALSE	FALSE	FALSE	FALSE	FALSE	TRUE	FALSE	FALSE	TRUE
5	G3BP1	NP_005745.1	-4.3115	3	0	0	2	1	-3.10575	-0.583806	0.787386	0.00328763	FALSE	FALSE	FALSE	FALSE	FALSE	FALSE	FALSE	FALSE	FALSE	FALSE
12	RNF41	NP_001229755.1	-4.3105	1	0	0	1	0	-1.69075	-0.922617	0.755768	0.0878911	FALSE	FALSE	FALSE	FALSE	FALSE	FALSE	FALSE	FALSE	FALSE	FALSE
7	GET4	NP_057033.2	-4.31	5	0	0	2	3	-3.57475	-0.328705	0.770889	0.000156359	FALSE	FALSE	FALSE	FALSE	FALSE	TRUE	FALSE	FALSE	FALSE	FALSE
3	WDR48	NP_065890.1	-4.3095	1	0	0	1	0	-1.68975	-1.27387	1.03414	0.147107	FALSE	FALSE	FALSE	FALSE	FALSE	FALSE	FALSE	FALSE	FALSE	FALSE
7	WASL	NP_003932.3	-4.3095	2	0	0	1	1	-2.07	-0.714014	0.800426	0.0356096	FALSE	FALSE	FALSE	FALSE	FALSE	FALSE	FALSE	FALSE	FALSE	FALSE
1	IARS2	NP_060530.3	-4.3085	1	0	0	1	0	-1.68875	-1.19982	1.46588	0.17983	FALSE	FALSE	FALSE	FALSE	FALSE	FALSE	TRUE	FALSE	FALSE	TRUE
15	SLTM	NP_079031.2	-4.308	2	0	0	1	1	-2.4065	-1.722	1.73444	0.146309	FALSE	FALSE	FALSE	FALSE	FALSE	FALSE	FALSE	FALSE	FALSE	FALSE
8	PHF20L1	NP_057102.4	-4.3075	1	0	0	1	0	-1.68775	-1.44824	1.63681	0.241541	FALSE	FALSE	FALSE	FALSE	FALSE	FALSE	FALSE	FALSE	FALSE	FALSE
7	KLHDC10	NP_055812.1	-4.3075	2	0	0	1	1	-2.3885	-0.83322	0.658891	0.0223984	FALSE	FALSE	FALSE	FALSE	FALSE	FALSE	FALSE	FALSE	FALSE	FALSE
2	ST3GAL5	NP_003887.3	-4.307	2	0	0	1	1	-2.334	-0.512127	0.542878	0.0105608	FALSE	FALSE	FALSE	FALSE	FALSE	FALSE	TRUE	FALSE	FALSE	TRUE
19	EPN1	NP_037465.2	-4.307	3	0	0	1	2	-2.05725	-0.803429	1.33177	0.0581771	FALSE	FALSE	FALSE	FALSE	FALSE	FALSE	FALSE	FALSE	FALSE	FALSE
5	REEP2	NP_057690.2	-4.307	1	0	0	1	0	-1.68725	-0.472715	0.448703	0.0294356	FALSE	FALSE	FALSE	FALSE	FALSE	FALSE	FALSE	FALSE	FALSE	FALSE
22	SLC5A1	NP_000334.1	-4.305	1	0	0	1	0	-1.68525	-0.871808	1.00751	0.100293	FALSE	FALSE	FALSE	FALSE	FALSE	FALSE	FALSE	FALSE	FALSE	FALSE
11	IGF2	NP_000603.1	-4.305	1	0	0	1	0	-1.68525	-0.384326	0.516714	0.0224027	FALSE	FALSE	FALSE	FALSE	FALSE	FALSE	TRUE	FALSE	FALSE	TRUE
20	MYT1	NP_004526.1	-4.305	4	0	0	1	3	-3.411	-1.83044	2.18297	0.0670159	FALSE	FALSE	FALSE	FALSE	FALSE	FALSE	TRUE	FALSE	FALSE	TRUE
5	MAPK9	NP_620708.1	-4.305	1	0	0	1	0	-1.68525	-0.550026	0.425656	0.0328277	FALSE	FALSE	FALSE	FALSE	FALSE	FALSE	FALSE	FALSE	FALSE	FALSE
11	NRXN2	NP_620060.1	-4.3045	6	0	0	2	4	-4.09325	-2.50257	3.90962	0.107597	FALSE	FALSE	FALSE	FALSE	FALSE	FALSE	TRUE	FALSE	FALSE	TRUE
18	MYO5B	NP_001073936.1	-4.3045	5	0	0	3	2	-6.32725	-1.81319	2.50177	0.00120191	FALSE	FALSE	FALSE	FALSE	FALSE	FALSE	TRUE	FALSE	FALSE	TRUE
8	RUNX1T1	NP_001185562.1	-4.3035	4	0	0	2	2	-3.82	-1.20963	1.20509	0.00891822	FALSE	FALSE	FALSE	FALSE	FALSE	FALSE	FALSE	FALSE	FALSE	FALSE
9	PCSK5	NP_001177411.1	-4.303	4	0	0	2	2	-3.994	-2.99063	3.62653	0.162929	FALSE	FALSE	FALSE	FALSE	FALSE	FALSE	FALSE	FALSE	FALSE	FALSE
3	ABCC5	NP_005679.2	-4.3	3	0	0	2	1	-2.7445	-1.80233	1.6279	0.0946448	FALSE	FALSE	FALSE	FALSE	FALSE	FALSE	FALSE	FALSE	FALSE	FALSE
4	GAB1	NP_997006.1	-4.2995	5	0	0	4	1	-6.18025	-0.97095	0.967454	5.43736e-05	FALSE	FALSE	FALSE	FALSE	FALSE	FALSE	FALSE	FALSE	FALSE	FALSE
4	UTP3	NP_065101.1	-4.2985	1	0	0	1	0	-1.67875	-0.713205	0.798934	0.0719475	FALSE	FALSE	FALSE	FALSE	FALSE	FALSE	FALSE	FALSE	FALSE	FALSE
7	MET	NP_001120972.1	-4.2985	3	0	0	3	0	-4.02275	-2.01842	2.25619	0.0431094	FALSE	FALSE	FALSE	FALSE	FALSE	FALSE	FALSE	FALSE	FALSE	FALSE
1	SLC6A9	NP_964012.2	-4.2975	2	0	0	1	1	-2.027	-1.08018	1.2186	0.0939865	FALSE	FALSE	FALSE	FALSE	FALSE	FALSE	TRUE	FALSE	FALSE	TRUE
12	SPRYD3	NP_116229.1	-4.297	1	0	0	1	0	-2.88975	-1.01364	1.01345	0.0210079	FALSE	FALSE	FALSE	FALSE	FALSE	FALSE	FALSE	FALSE	FALSE	FALSE
1	PTPRF	NP_002831.2	-4.2965	9	0	0	2	7	-6.92675	-3.74589	5.01329	0.0348067	FALSE	FALSE	FALSE	FALSE	FALSE	FALSE	TRUE	FALSE	FALSE	TRUE
7	LMTK2	NP_055731.2	-4.2965	6	0	0	3	3	-4.6405	-2.13506	3.04143	0.0314266	FALSE	FALSE	FALSE	FALSE	FALSE	FALSE	FALSE	FALSE	FALSE	FALSE
16	SH2B1	NP_001139267.1	-4.296	3	0	0	1	2	-2.66175	-1.03269	1.37532	0.0371552	FALSE	FALSE	FALSE	FALSE	FALSE	FALSE	FALSE	FALSE	FALSE	TRUE
3	DYNC1LI1	NP_057225.2	-4.296	3	0	0	2	1	-3.37225	-0.595126	0.725408	0.00201024	FALSE	FALSE	FALSE	FALSE	FALSE	FALSE	FALSE	FALSE	FALSE	FALSE
22	TFIP11	NP_001008697.1	-4.296	3	0	0	3	0	-3.57525	-1.34045	1.59305	0.0208716	FALSE	FALSE	FALSE	FALSE	FALSE	FALSE	FALSE	FALSE	FALSE	FALSE
8	KAT6A	NP_006757.2	-4.294	15	0	0	14	1	-15.4703	-3.3331	3.68035	1.36349e-07	TRUE	FALSE	TRUE	FALSE	FALSE	FALSE	TRUE	TRUE	FALSE	TRUE
5	NNT	NP_036475.3	-4.2935	1	0	0	1	0	-1.67375	-1.52989	1.67705	0.259116	FALSE	FALSE	FALSE	FALSE	FALSE	FALSE	FALSE	FALSE	FALSE	FALSE
X	PDZD4	NP_001290441.1	-4.2935	4	0	0	3	1	-4.566	-1.39543	1.33371	0.00464539	FALSE	FALSE	FALSE	FALSE	FALSE	FALSE	FALSE	FALSE	FALSE	FALSE
4	ABLIM2	NP_001123555.1	-4.293	4	0	0	3	1	-4.0615	-0.659651	1.20528	0.000695778	FALSE	FALSE	FALSE	FALSE	FALSE	FALSE	FALSE	FALSE	FALSE	FALSE
1	SYCP1	NP_001269470.1	-4.292	1	0	0	1	0	-1.67225	-1.08446	0.967281	0.124575	FALSE	FALSE	FALSE	FALSE	FALSE	FALSE	FALSE	FALSE	FALSE	FALSE
2	ROCK2	NP_004841.2	-4.292	3	0	0	3	0	-3.0095	-1.85994	1.36602	0.0548392	FALSE	FALSE	FALSE	FALSE	FALSE	FALSE	FALSE	FALSE	FALSE	FALSE
10	PRKG1	NP_006249.1	-4.2915	2	0	0	2	0	-3.297	-0.721982	0.591823	0.00366438	FALSE	FALSE	FALSE	FALSE	FALSE	FALSE	FALSE	FALSE	FALSE	FALSE
10	DDX50	NP_076950.1	-4.291	1	0	0	1	0	-1.67125	-0.827499	0.71094	0.0753049	FALSE	FALSE	FALSE	FALSE	FALSE	FALSE	FALSE	FALSE	FALSE	FALSE
5	HOMER1	NP_004263.1	-4.291	2	0	0	2	0	-2.631	-0.757323	0.561144	0.0118203	FALSE	FALSE	FALSE	FALSE	FALSE	FALSE	FALSE	FALSE	FALSE	FALSE
20	RBM12	NP_001185767.1	-4.291	3	0	0	2	1	0	-0.0180936	0.0254436	1	FALSE	FALSE	FALSE	FALSE	FALSE	FALSE	FALSE	FALSE	FALSE	FALSE
15	RASGRP1	NP_005730.2	-4.29	3	0	0	2	1	-3.36575	-1.10406	0.997798	0.0120046	FALSE	FALSE	FALSE	FALSE	FALSE	FALSE	FALSE	FALSE	FALSE	FALSE
12	PFKM	NP_000280.1	-4.29	4	0	0	3	1	-5.0485	-1.47901	1.44897	0.00303406	FALSE	FALSE	FALSE	FALSE	FALSE	FALSE	FALSE	FALSE	FALSE	FALSE
X	SLC38A5	NP_277053.2	-4.289	2	0	0	2	0	-2.5005	-0.773822	0.51501	0.0133415	FALSE	FALSE	FALSE	FALSE	FALSE	FALSE	FALSE	FALSE	FALSE	FALSE
15	INO80	NP_060023.1	-4.289	4	0	0	3	1	-3.8235	-2.3649	1.97277	0.0544791	FALSE	FALSE	FALSE	FALSE	FALSE	FALSE	FALSE	FALSE	FALSE	FALSE
11	EED	NP_003788.2	-4.288	2	0	0	1	1	-2.2665	-0.988368	0.568493	0.0243882	FALSE	FALSE	FALSE	FALSE	FALSE	FALSE	TRUE	FALSE	FALSE	TRUE
2	ALK	NP_004295.2	-4.288	5	0	0	3	2	-4.58475	-2.02183	2.61248	0.0261881	FALSE	FALSE	FALSE	FALSE	FALSE	FALSE	FALSE	FALSE	FALSE	FALSE
15	CSNK1G1	NP_071331.2	-4.288	2	0	0	2	0	-2.6145	-0.567336	0.540181	0.00709121	FALSE	FALSE	FALSE	FALSE	FALSE	FALSE	TRUE	FALSE	FALSE	TRUE
2	PHOSPHO2-KLHL23	NP_001186219.1	-4.287	0	0	0	0	0	-1.79125	-0.734506	0.871175	0.0617537	FALSE	FALSE	FALSE	FALSE	FALSE	FALSE	FALSE	FALSE	FALSE	FALSE
X	MAOB	NP_000889.3	-4.287	3	0	0	1	2	-2.66975	-0.623082	0.506918	0.00699214	FALSE	FALSE	FALSE	FALSE	FALSE	FALSE	FALSE	FALSE	FALSE	FALSE
1	IFNLR1	NP_734464.1	-4.2865	1	0	0	1	0	-1.66675	-0.641532	1.01144	0.0677983	FALSE	FALSE	FALSE	FALSE	FALSE	FALSE	FALSE	FALSE	FALSE	FALSE
5	CYFIP2	NP_001278650.1	-4.2865	3	0	0	3	0	-4.57375	-3.59125	2.62799	0.0687722	FALSE	FALSE	FALSE	FALSE	FALSE	FALSE	TRUE	FALSE	FALSE	TRUE
11	EIF4G2	NP_001409.3	-4.286	5	0	0	1	4	-3.9215	-1.45561	1.5034	0.0137015	FALSE	FALSE	FALSE	FALSE	FALSE	FALSE	FALSE	FALSE	FALSE	FALSE
14	SEL1L	NP_005056.3	-4.2855	2	0	0	2	0	-3.081	-1.02317	0.998583	0.0161783	FALSE	FALSE	FALSE	FALSE	FALSE	FALSE	FALSE	FALSE	FALSE	FALSE
10	TET1	NP_085128.2	-4.285	3	0	0	2	1	-3.12875	-2.16833	2.53472	0.139825	FALSE	FALSE	FALSE	FALSE	FALSE	FALSE	FALSE	FALSE	FALSE	FALSE
8	RNF19A	NP_001267468.1	-4.285	3	0	0	2	1	-3.08375	-1.19181	1.2136	0.0252489	FALSE	FALSE	FALSE	FALSE	FALSE	FALSE	FALSE	FALSE	FALSE	FALSE
9	TESK1	NP_006276.2	-4.285	3	0	0	2	1	-2.96275	-0.838676	1.05548	0.0128348	FALSE	FALSE	FALSE	FALSE	FALSE	FALSE	FALSE	FALSE	FALSE	FALSE
3	ARMC8	NP_056211.2	-4.2845	1	0	0	1	0	-1.66475	-1.03811	1.05857	0.119668	FALSE	FALSE	FALSE	FALSE	FALSE	FALSE	FALSE	FALSE	FALSE	FALSE
8	UNC5D	NP_543148.2	-4.2845	4	0	0	4	0	-5.165	-1.77286	1.70096	0.00513042	FALSE	FALSE	FALSE	FALSE	FALSE	FALSE	FALSE	FALSE	FALSE	FALSE
6	TFAP2B	NP_003212.2	-4.284	5	0	0	3	2	-5.44275	-0.950487	1.08228	0.000230575	FALSE	FALSE	FALSE	FALSE	FALSE	FALSE	TRUE	FALSE	FALSE	TRUE
X	SH3KBP1	NP_114098.1	-4.284	1	0	0	1	0	-1.66425	-0.913337	0.693526	0.0775187	FALSE	FALSE	FALSE	FALSE	FALSE	FALSE	FALSE	FALSE	FALSE	FALSE
6	SEC63	NP_009145.1	-4.283	1	0	0	1	0	-1.66325	-1.32375	1.21482	0.178859	FALSE	FALSE	FALSE	FALSE	FALSE	FALSE	FALSE	FALSE	FALSE	FALSE
X	TCEAL1	NP_001006641.1	-4.283	2	0	0	2	0	-2.5865	-0.328634	0.200987	0.00203841	FALSE	FALSE	FALSE	FALSE	FALSE	FALSE	FALSE	FALSE	FALSE	FALSE
1	GJA4	NP_002051.2	-4.2825	3	0	0	1	2	-2.89725	-0.517024	0.663647	0.00372893	FALSE	FALSE	FALSE	FALSE	FALSE	FALSE	FALSE	FALSE	FALSE	FALSE
22	PANX2	NP_443071.2	-4.2805	1	0	0	1	0	-1.66075	-1.60162	2.31647	0.343753	FALSE	FALSE	FALSE	FALSE	FALSE	FALSE	FALSE	FALSE	FALSE	FALSE
5	RAB24	NP_001026847.1	-4.2805	1	0	0	1	0	-1.66075	-0.529465	0.450906	0.0347764	FALSE	FALSE	FALSE	FALSE	FALSE	FALSE	FALSE	FALSE	FALSE	FALSE
19	UBE2M	NP_003960.1	-4.2805	1	0	0	1	0	-1.66075	-0.610011	0.327097	0.0277823	FALSE	FALSE	FALSE	FALSE	FALSE	FALSE	FALSE	FALSE	FALSE	FALSE
8	EYA1	NP_742055.1	-4.28	1	0	0	1	0	-1.66025	-0.784012	1.03137	0.089928	FALSE	FALSE	FALSE	FALSE	FALSE	FALSE	TRUE	FALSE	FALSE	TRUE
22	ZNRF3	NP_001193927.1	-4.2795	4	0	0	3	1	-4.8795	-1.28417	1.96022	0.00270112	FALSE	FALSE	FALSE	FALSE	FALSE	FALSE	FALSE	FALSE	FALSE	FALSE
6	SIM1	NP_005059.2	-4.279	2	0	0	1	1	-2.2885	-0.889131	1.26471	0.0447129	FALSE	FALSE	FALSE	FALSE	FALSE	FALSE	TRUE	FALSE	FALSE	TRUE
14	FUT8	NP_835368.1	-4.2785	1	0	0	1	0	-1.65875	-0.894341	0.896067	0.091521	FALSE	FALSE	FALSE	FALSE	FALSE	FALSE	TRUE	FALSE	FALSE	TRUE
1	APH1A	NP_001071096.1	-4.278	2	0	0	1	1	-1.66825	-0.581858	0.493094	0.0368551	FALSE	FALSE	FALSE	FALSE	FALSE	FALSE	FALSE	FALSE	FALSE	FALSE
20	CBLN4	NP_542184.1	-4.278	1	0	0	1	0	-1.65825	-0.442205	0.513844	0.0295259	FALSE	FALSE	FALSE	FALSE	FALSE	FALSE	FALSE	FALSE	FALSE	FALSE
15	NTRK3	NP_002521.2	-4.2775	2	0	0	2	0	-3.00275	-1.00061	1.5407	0.0250849	FALSE	FALSE	FALSE	FALSE	FALSE	FALSE	FALSE	FALSE	FALSE	FALSE
15	ALDH1A3	NP_000684.2	-4.277	3	0	0	3	0	-3.54475	-0.956269	0.977204	0.00650286	FALSE	FALSE	FALSE	FALSE	FALSE	FALSE	TRUE	FALSE	FALSE	TRUE
4	TLL1	NP_036596.3	-4.277	1	0	0	1	0	-1.65725	-1.32801	1.51973	0.216701	FALSE	FALSE	FALSE	FALSE	FALSE	FALSE	TRUE	FALSE	FALSE	TRUE
19	SIPA1L3	NP_055888.1	-4.2765	3	0	0	2	1	-2.69175	-2.75938	4.40226	0.427335	FALSE	FALSE	FALSE	FALSE	FALSE	FALSE	FALSE	FALSE	FALSE	FALSE
21	KCNJ6	NP_002231.1	-4.276	1	0	0	1	0	-1.65625	-1.0878	0.662431	0.0822822	FALSE	FALSE	FALSE	FALSE	FALSE	FALSE	TRUE	FALSE	FALSE	TRUE
4	ZNF827	NP_001293144.1	-4.2745	3	0	0	3	0	-3.93575	-1.96308	2.03706	0.0395308	FALSE	FALSE	FALSE	FALSE	FALSE	FALSE	FALSE	FALSE	FALSE	FALSE
8	HAS2	NP_005319.1	-4.2745	2	0	0	2	0	-2.686	-1.46413	0.872723	0.0335421	FALSE	FALSE	FALSE	FALSE	FALSE	FALSE	FALSE	FALSE	FALSE	FALSE
5	PDGFRB	NP_002600.1	-4.274	3	0	0	2	1	-3.82825	-1.76606	1.93229	0.0330551	FALSE	FALSE	FALSE	FALSE	FALSE	FALSE	TRUE	FALSE	FALSE	TRUE
X	SYN1	NP_598006.1	-4.274	1	0	0	1	0	-1.65425	-1.06026	0.768641	0.0977403	FALSE	FALSE	FALSE	FALSE	FALSE	FALSE	TRUE	FALSE	FALSE	TRUE
1	SNX27	NP_112180.4	-4.273	4	0	0	4	0	-4.582	-1.1096	1.06575	0.00187336	FALSE	FALSE	FALSE	FALSE	FALSE	FALSE	FALSE	FALSE	FALSE	FALSE
18	DLGAP1	NP_004737.2	-4.273	2	0	0	2	0	-3.015	-2.00262	2.52762	0.137779	FALSE	FALSE	FALSE	FALSE	FALSE	FALSE	FALSE	FALSE	FALSE	FALSE
11	FCHSD2	NP_055639.2	-4.2725	2	0	0	2	0	-2.744	-1.16578	1.24109	0.04106	FALSE	FALSE	FALSE	FALSE	FALSE	FALSE	FALSE	FALSE	FALSE	FALSE
1	JAK1	NP_001307852.1	-4.271	1	0	0	1	0	-1.65125	-2.54069	2.08542	0.402784	FALSE	FALSE	FALSE	FALSE	FALSE	FALSE	FALSE	FALSE	FALSE	FALSE
20	SNRPB2	NP_937863.1	-4.2705	1	0	0	1	0	-1.68125	-0.32562	0.337387	0.0151837	FALSE	FALSE	FALSE	FALSE	FALSE	FALSE	FALSE	FALSE	FALSE	FALSE
1	TPM3	NP_689476.2	-4.27	1	0	0	1	0	-1.65025	-0.696611	0.468968	0.0449166	FALSE	FALSE	FALSE	FALSE	FALSE	FALSE	TRUE	FALSE	FALSE	TRUE
11	PCF11	NP_056969.2	-4.2695	4	0	0	2	2	-3.5835	-2.20328	2.47871	0.0928796	FALSE	FALSE	FALSE	FALSE	FALSE	FALSE	FALSE	FALSE	FALSE	FALSE
6	TTK	NP_001160163.1	-4.2695	4	0	0	2	2	-3.787	-0.769167	0.813789	0.00210718	FALSE	FALSE	FALSE	FALSE	FALSE	FALSE	FALSE	FALSE	FALSE	FALSE
X	CHIC1	NP_001034929.2	-4.269	1	0	0	1	0	-1.64925	-0.235668	0.172965	0.0084608	FALSE	FALSE	FALSE	FALSE	FALSE	FALSE	FALSE	FALSE	FALSE	FALSE
20	ADRM1	NP_008933.2	-4.269	3	0	0	1	2	-1.66925	-0.727385	0.984947	0.0748257	FALSE	FALSE	FALSE	FALSE	FALSE	FALSE	FALSE	FALSE	FALSE	FALSE
5	DHX29	NP_061903.2	-4.2685	3	0	0	3	0	-3.50575	-1.53683	1.39257	0.0268538	FALSE	FALSE	FALSE	FALSE	FALSE	FALSE	FALSE	FALSE	FALSE	FALSE
19	ARHGAP35	NP_004482.4	-4.268	10	0	0	8	2	-12.7825	-3.23857	2.69104	3.38489e-06	FALSE	FALSE	FALSE	FALSE	FALSE	FALSE	TRUE	TRUE	FALSE	TRUE
7	TAF6	NP_005632.1	-4.2675	3	0	0	3	0	-0.94625	-0.0653426	0.0779648	0.00982389	FALSE	FALSE	FALSE	FALSE	FALSE	FALSE	FALSE	FALSE	FALSE	FALSE
1	KCNN3	NP_002240.3	-4.2675	3	0	0	3	0	-4.02975	-1.57392	1.24375	0.0113267	FALSE	FALSE	FALSE	FALSE	FALSE	FALSE	TRUE	FALSE	FALSE	TRUE
10	SLIT1	NP_003052.2	-4.267	4	0	0	3	1	-5.359	-2.90818	3.41711	0.0415015	FALSE	FALSE	FALSE	FALSE	FALSE	FALSE	FALSE	FALSE	FALSE	FALSE
12	MVK	NP_000422.1	-4.267	1	0	0	1	0	-1.64725	-0.650785	0.786626	0.0633238	FALSE	FALSE	FALSE	FALSE	FALSE	FALSE	FALSE	FALSE	FALSE	TRUE
7	CADPS2	NP_060424.9	-4.266	3	0	0	1	2	-2.84125	-2.04909	2.30643	0.154066	FALSE	FALSE	FALSE	FALSE	FALSE	FALSE	FALSE	FALSE	FALSE	FALSE
14	DLST	NP_001924.2	-4.265	1	0	0	1	0	-1.64525	-0.509164	0.732763	0.0426822	FALSE	FALSE	FALSE	FALSE	FALSE	FALSE	FALSE	FALSE	FALSE	FALSE
14	DICER1	NP_803187.1	-4.265	5	0	0	5	0	-7.14125	-2.95889	2.63414	0.00394965	FALSE	FALSE	FALSE	FALSE	FALSE	FALSE	FALSE	FALSE	FALSE	FALSE
2	CFLAR	NP_003870.4	-4.265	1	0	0	1	0	-1.64525	-0.869313	0.72344	0.0787511	FALSE	FALSE	FALSE	FALSE	FALSE	FALSE	FALSE	FALSE	FALSE	FALSE
1	PPP2R5A	NP_006234.1	-4.2645	2	0	0	2	0	-2.815	-0.888706	0.70794	0.0134965	FALSE	FALSE	FALSE	FALSE	FALSE	FALSE	FALSE	FALSE	FALSE	FALSE
3	GRM7	NP_000835.1	-4.264	3	0	0	2	1	-3.09925	-1.45607	1.75957	0.0513339	FALSE	FALSE	FALSE	FALSE	FALSE	FALSE	FALSE	FALSE	FALSE	FALSE
9	RNF20	NP_062538.5	-4.2635	4	0	0	3	1	-4.66	-1.90733	1.82595	0.0133344	FALSE	FALSE	FALSE	FALSE	FALSE	FALSE	FALSE	FALSE	FALSE	FALSE
10	GLUD1	NP_005262.1	-4.263	3	0	0	2	1	-3.21175	-0.900028	0.816772	0.00846925	FALSE	FALSE	FALSE	FALSE	FALSE	FALSE	TRUE	FALSE	FALSE	TRUE
19	GRIK5	NP_002079.3	-4.263	4	0	0	4	0	-5.5235	-1.94459	2.8803	0.00784292	FALSE	FALSE	FALSE	FALSE	FALSE	FALSE	FALSE	FALSE	FALSE	FALSE
17	MYH10	NP_005955.3	-4.2625	5	0	0	3	2	0	-0.0881508	0.0778635	1	FALSE	FALSE	FALSE	FALSE	FALSE	FALSE	TRUE	FALSE	FALSE	TRUE
19	TICAM1	NP_891549.1	-4.262	1	0	0	1	0	-1.64225	-0.807986	1.23593	0.10556	FALSE	FALSE	FALSE	FALSE	FALSE	TRUE	FALSE	FALSE	FALSE	FALSE
2	ATG4B	NP_037457.3	-4.2615	3	0	0	3	0	-4.13675	-0.581621	0.727617	0.000453369	FALSE	FALSE	FALSE	FALSE	FALSE	FALSE	FALSE	FALSE	FALSE	FALSE
14	BAZ1A	NP_038476.2	-4.261	4	0	0	3	1	-4.683	-2.94763	2.59952	0.05237	FALSE	FALSE	FALSE	FALSE	FALSE	FALSE	FALSE	FALSE	FALSE	FALSE
17	ABCA5	NP_061142.2	-4.26	3	0	0	2	1	-2.80025	-1.76335	2.18473	0.126018	FALSE	FALSE	FALSE	FALSE	FALSE	FALSE	FALSE	FALSE	FALSE	FALSE
14	NPAS3	NP_775182.1	-4.26	3	0	0	3	0	-3.98325	-1.51328	2.10643	0.0205208	FALSE	FALSE	FALSE	FALSE	FALSE	FALSE	FALSE	FALSE	FALSE	FALSE
2	CROCC2	NP_001338234.1	-4.2595	1	0	0	1	0					FALSE	FALSE	FALSE	FALSE	FALSE	FALSE	FALSE	FALSE	FALSE	FALSE
16	KLHL36	NP_079007.2	-4.259	3	0	0	1	2	-2.52025	-0.908962	1.71917	0.0397447	FALSE	FALSE	FALSE	FALSE	FALSE	FALSE	FALSE	FALSE	FALSE	FALSE
9	AGTPBP1	NP_001273644.1	-4.2585	3	0	0	2	1	-3.25075	-1.85515	1.94365	0.0748666	FALSE	FALSE	FALSE	FALSE	FALSE	FALSE	TRUE	FALSE	FALSE	TRUE
8	SLA	NP_006739.2	-4.258	1	0	0	1	0	-1.58225	-0.342402	0.380376	0.0216152	FALSE	FALSE	FALSE	FALSE	FALSE	FALSE	FALSE	FALSE	FALSE	FALSE
1	LRRN2	NP_006329.2	-4.257	3	0	0	1	2	-2.40175	-1.20569	1.54569	0.0799404	FALSE	FALSE	FALSE	FALSE	FALSE	FALSE	FALSE	FALSE	FALSE	FALSE
10	BMI1	NP_005171.4	-4.2565	2	0	0	2	0	-2.8625	-0.541744	0.334319	0.00293635	FALSE	FALSE	FALSE	FALSE	FALSE	FALSE	FALSE	FALSE	FALSE	FALSE
2	ZAP70	NP_001070.2	-4.256	3	0	0	1	2	-2.46125	-0.753783	0.885361	0.0218419	FALSE	FALSE	FALSE	FALSE	FALSE	FALSE	FALSE	FALSE	FALSE	FALSE
14	NDRG2	NP_001307258.1	-4.256	1	0	0	1	0	-1.91525	-0.397675	0.60494	0.0150325	FALSE	FALSE	FALSE	FALSE	FALSE	FALSE	FALSE	FALSE	FALSE	FALSE
17	NPLOC4	NP_060391.2	-4.256	3	0	0	2	1	-3.06375	-1.23035	1.19797	0.0273845	FALSE	FALSE	FALSE	FALSE	FALSE	FALSE	FALSE	FALSE	FALSE	FALSE
13	FOXO1	NP_002006.2	-4.255	1	0	0	1	0	-1.63525	-0.906387	1.13282	0.119599	FALSE	FALSE	FALSE	FALSE	FALSE	FALSE	FALSE	FALSE	FALSE	FALSE
6	SENP6	NP_056386.2	-4.2535	2	0	0	2	0	-2.3825	-1.33988	1.68199	0.105248	FALSE	FALSE	FALSE	FALSE	FALSE	FALSE	FALSE	FALSE	FALSE	FALSE
3	LEKR1	NP_001004316.2	-4.2525	3	0	0	3	0	-3.03875	-0.87947	1.00813	0.012603	FALSE	FALSE	FALSE	FALSE	FALSE	FALSE	FALSE	FALSE	FALSE	FALSE
2	NABP1	NP_001026886.1	-4.251	1	0	0	1	0	-1.63125	-0.256598	0.297147	0.0108718	FALSE	FALSE	FALSE	FALSE	FALSE	FALSE	FALSE	FALSE	FALSE	FALSE
X	ERCC6L	NP_060139.2	-4.251	2	0	0	2	0	-2.809	-1.17628	0.714429	0.0180698	FALSE	FALSE	FALSE	FALSE	FALSE	FALSE	FALSE	FALSE	FALSE	FALSE
11	MRPL23	NP_066957.3	-4.251	2	0	0	2	0	-2.671	-0.5478	0.432005	0.00574198	FALSE	FALSE	FALSE	TRUE	FALSE	FALSE	FALSE	FALSE	FALSE	FALSE
2	SCN9A	NP_001352465.1	-4.2505	3	0	0	1	2	-3.36075	-2.2891	3.26474	0.148632	FALSE	FALSE	FALSE	FALSE	FALSE	FALSE	FALSE	FALSE	FALSE	FALSE
10	PSD	NP_001257894.1	-4.25	1	0	0	1	0	-1.63025	-1.63214	1.85573	0.312556	FALSE	FALSE	FALSE	FALSE	FALSE	FALSE	FALSE	FALSE	FALSE	FALSE
X	MCF2	NP_001165347.1	-4.2495	1	0	0	1	0	-1.58025	-1.00083	0.829867	0.117537	FALSE	FALSE	FALSE	FALSE	FALSE	FALSE	FALSE	FALSE	FALSE	FALSE
15	PPIP5K1	NP_001124330.1	-4.249	1	0	0	1	0	-1.62925	-5.44266	2.31816	0.495215	FALSE	FALSE	FALSE	TRUE	FALSE	FALSE	FALSE	FALSE	FALSE	FALSE
18	ZBTB14	NP_001137295.1	-4.249	1	0	0	1	0	-1.62925	-1.04856	0.818536	0.106932	FALSE	FALSE	FALSE	FALSE	FALSE	FALSE	FALSE	FALSE	FALSE	FALSE
11	KAT5	NP_874369.1	-4.2485	3	0	0	3	0	-4.53275	-0.941641	0.799374	0.00097772	FALSE	FALSE	FALSE	FALSE	FALSE	FALSE	TRUE	FALSE	FALSE	TRUE
5	CTNND2	NP_001323.1	-4.2475	5	0	0	3	2	-4.88625	-2.18236	2.78669	0.023821	FALSE	FALSE	FALSE	FALSE	FALSE	FALSE	TRUE	FALSE	FALSE	TRUE
4	AFP	NP_001125.1	-4.247	1	0	0	1	0	-1.62725	-0.811021	0.890899	0.0869855	FALSE	FALSE	FALSE	FALSE	FALSE	FALSE	FALSE	FALSE	FALSE	FALSE
1	ALG6	NP_037471.2	-4.2455	3	0	0	2	1	-3.57425	-0.686103	0.73496	0.00213978	FALSE	FALSE	FALSE	FALSE	FALSE	FALSE	TRUE	FALSE	FALSE	TRUE
19	TUBB4A	NP_006078.2	-4.2455	3	0	0	3	0	-3.75625	-1.55864	1.31636	0.0170627	FALSE	FALSE	FALSE	FALSE	FALSE	FALSE	TRUE	FALSE	FALSE	TRUE
10	POLR3A	NP_008986.2	-4.244	3	0	0	2	1	-2.81625	-2.32136	2.49471	0.199235	FALSE	FALSE	FALSE	FALSE	FALSE	FALSE	TRUE	FALSE	FALSE	TRUE
15	TCF12	NP_996919.1	-4.2425	4	0	0	3	1	-4.6435	-0.770804	0.96086	0.000450842	FALSE	FALSE	FALSE	FALSE	FALSE	FALSE	TRUE	FALSE	FALSE	TRUE
9	DOLPP1	NP_001129389.1	-4.242	1	0	0	1	0	-1.62225	-0.323299	0.396075	0.0164088	FALSE	FALSE	FALSE	FALSE	FALSE	FALSE	FALSE	FALSE	FALSE	FALSE
X	AMOT	NP_001106962.1	-4.242	4	0	0	4	0	-5.6785	-1.20879	0.989411	0.000359651	FALSE	FALSE	FALSE	FALSE	FALSE	FALSE	FALSE	FALSE	FALSE	FALSE
6	UST	NP_005706.1	-4.2415	1	0	0	1	0	-1.62175	-0.571547	0.571845	0.04648	FALSE	FALSE	FALSE	FALSE	FALSE	FALSE	FALSE	FALSE	FALSE	FALSE
3	TMEM45A	NP_060474.1	-4.2415	2	0	0	2	0	-3.0165	-0.309631	0.406611	0.000740334	FALSE	FALSE	FALSE	FALSE	FALSE	FALSE	FALSE	FALSE	FALSE	FALSE
4	MGARP	NP_116012.2	-4.2415	1	0	0	1	0	-1.79725	-0.336291	0.468755	0.0119801	FALSE	FALSE	FALSE	FALSE	FALSE	FALSE	FALSE	FALSE	FALSE	FALSE
1	RC3H1	NP_001287779.1	-4.2405	3	0	0	2	1	-2.97975	-1.94853	1.82598	0.0944362	FALSE	FALSE	FALSE	FALSE	FALSE	FALSE	FALSE	FALSE	FALSE	FALSE
13	KATNAL1	NP_001014402.1	-4.2405	1	0	0	1	0	-1.62075	-0.586759	0.47876	0.0421644	FALSE	FALSE	FALSE	FALSE	FALSE	FALSE	FALSE	FALSE	FALSE	FALSE
20	ZNF512B	NP_065764.1	-4.24	2	0	0	1	1	-1.814	-0.930693	1.41271	0.110233	FALSE	FALSE	FALSE	FALSE	FALSE	FALSE	FALSE	FALSE	FALSE	FALSE
16	TUBB3	NP_006077.2	-4.24	1	0	0	1	0	-1.62025	-1.72	1.28477	0.215751	FALSE	FALSE	FALSE	FALSE	FALSE	FALSE	TRUE	FALSE	FALSE	TRUE
12	CAND1	NP_060918.2	-4.238	1	0	0	1	0	-1.61825	-2.42854	1.87427	0.378517	FALSE	FALSE	FALSE	FALSE	FALSE	FALSE	FALSE	FALSE	FALSE	FALSE
17	PMP22	NP_000295.1	-4.238	2	0	0	2	0	-3.1475	-0.290971	0.356576	0.000368277	FALSE	FALSE	FALSE	FALSE	FALSE	FALSE	FALSE	FALSE	FALSE	FALSE
4	HAND2	NP_068808.1	-4.2375	1	0	0	1	0	-1.61775	-0.482183	0.586421	0.0394823	FALSE	FALSE	FALSE	FALSE	FALSE	FALSE	FALSE	FALSE	FALSE	FALSE
16	CACNG3	NP_006530.1	-4.2365	2	0	0	2	0	-2.9665	-0.801191	0.650892	0.00824221	FALSE	FALSE	FALSE	FALSE	FALSE	FALSE	FALSE	FALSE	FALSE	FALSE
17	WDR45B	NP_062559.2	-4.2365	2	0	0	1	1	-1.851	-0.5479	0.64006	0.031496	FALSE	FALSE	FALSE	FALSE	FALSE	FALSE	TRUE	FALSE	FALSE	TRUE
5	EDIL3	NP_005702.3	-4.236	1	0	0	1	0	-1.61625	-0.538131	0.539068	0.0430072	FALSE	FALSE	FALSE	FALSE	FALSE	FALSE	FALSE	FALSE	FALSE	FALSE
16	CARMIL2	NP_001013860.1	-4.2355	4	0	0	2	2	-3.506	-1.9942	2.63016	0.0869897	FALSE	FALSE	FALSE	FALSE	FALSE	FALSE	FALSE	FALSE	FALSE	FALSE
1	NDUFS2	NP_004541.1	-4.235	1	0	0	1	0	-1.61525	-0.722208	0.737252	0.0749501	FALSE	FALSE	FALSE	FALSE	FALSE	FALSE	FALSE	FALSE	FALSE	FALSE
2	KCNJ3	NP_002230.1	-4.2345	2	0	0	2	0	-3.0105	-1.61953	0.835823	0.0211789	FALSE	FALSE	FALSE	FALSE	FALSE	FALSE	FALSE	FALSE	FALSE	FALSE
3	RBMS3	NP_001003793.1	-4.2345	2	0	0	1	1	-2.2055	-0.528725	0.626384	0.0143112	FALSE	FALSE	FALSE	FALSE	FALSE	FALSE	FALSE	FALSE	FALSE	FALSE
10	PTPRE	NP_006495.1	-4.2335	3	0	0	3	0	-3.83075	-1.23334	1.47435	0.0109419	FALSE	FALSE	FALSE	FALSE	FALSE	FALSE	FALSE	FALSE	FALSE	FALSE
7	ZNF282	NP_003566.1	-4.2325	1	0	0	1	0	-1.61275	-1.03457	1.46726	0.164926	FALSE	FALSE	FALSE	FALSE	FALSE	FALSE	FALSE	FALSE	FALSE	FALSE
1	TP73	NP_005418.1	-4.2315	5	0	0	3	2	-5.03825	-0.954375	1.31041	0.000589336	FALSE	FALSE	FALSE	FALSE	FALSE	FALSE	TRUE	FALSE	FALSE	TRUE
10	PYROXD2	NP_116098.2	-4.2305	3	0	0	1	2	-2.07075	-0.587134	1.12737	0.0305033	FALSE	FALSE	FALSE	FALSE	FALSE	FALSE	FALSE	FALSE	FALSE	FALSE
15	FRMD5	NP_116281.2	-4.2305	4	0	0	4	0	-5.56	-0.858385	0.899491	0.000119639	FALSE	FALSE	FALSE	FALSE	FALSE	FALSE	FALSE	FALSE	FALSE	FALSE
4	MAB21L2	NP_006430.1	-4.2305	1	0	0	1	0	-1.61075	-1.03334	1.05438	0.143533	FALSE	FALSE	FALSE	FALSE	FALSE	FALSE	TRUE	FALSE	FALSE	TRUE
2	DPYSL5	NP_001240652.1	-4.2295	7	0	0	3	4	-5.37325	-1.0287	1.06454	0.00042235	FALSE	FALSE	FALSE	FALSE	FALSE	FALSE	TRUE	FALSE	FALSE	TRUE
X	BEND2	NP_699177.2	-4.229	1	0	0	1	0	-1.60925	-0.564074	0.498329	0.0434426	FALSE	FALSE	FALSE	FALSE	FALSE	FALSE	FALSE	FALSE	FALSE	FALSE
11	OR52J3	NP_001001916.2	-4.229	2	0	0	1	1	-1.6685	-0.187682	0.575403	0.00840919	FALSE	FALSE	FALSE	FALSE	FALSE	FALSE	FALSE	FALSE	FALSE	FALSE
X	IGSF1	NP_001164432.1	-4.229	1	0	0	1	0	-1.95925	-1.47444	1.27073	0.139177	FALSE	FALSE	FALSE	FALSE	FALSE	FALSE	TRUE	FALSE	FALSE	TRUE
20	FOXA2	NP_068556.2	-4.228	2	0	0	1	1	-1.7535	-0.557139	0.947071	0.045755	FALSE	FALSE	FALSE	FALSE	FALSE	FALSE	FALSE	FALSE	FALSE	FALSE
17	BAIAP2	NP_059345.1	-4.228	2	0	0	1	1	-2.207	-0.888244	1.11508	0.0517682	FALSE	FALSE	FALSE	FALSE	FALSE	FALSE	FALSE	FALSE	FALSE	FALSE
3	IMPDH2	NP_000875.2	-4.2275	3	0	0	2	1	-3.02825	-0.877797	0.897509	0.0119229	FALSE	FALSE	FALSE	FALSE	FALSE	FALSE	FALSE	FALSE	FALSE	FALSE
11	FHIP1B	NP_115503.2	-4.2275	8	0	0	4	4	-6.7835	-1.44381	2.10725	0.000183362	FALSE	FALSE	FALSE	FALSE	FALSE	FALSE	FALSE	FALSE	FALSE	FALSE
5	FEM1C	NP_064562.1	-4.2275	2	0	0	2	0	-3.1615	-1.15952	1.00933	0.0172768	FALSE	FALSE	FALSE	FALSE	FALSE	FALSE	FALSE	FALSE	FALSE	FALSE
3	APPL1	NP_036228.1	-4.227	1	0	0	1	0	-1.60725	-1.14687	1.13991	0.160769	FALSE	FALSE	FALSE	FALSE	FALSE	FALSE	FALSE	FALSE	FALSE	FALSE
4	ACOX3	NP_003492.2	-4.227	2	0	0	1	1	-1.61725	-0.846399	1.53417	0.128884	FALSE	FALSE	FALSE	FALSE	FALSE	FALSE	FALSE	FALSE	FALSE	FALSE
7	FOXK1	NP_001032242.1	-4.226	2	0	0	1	1	-2.2725	-1.314	2.37153	0.137564	FALSE	FALSE	FALSE	FALSE	FALSE	FALSE	FALSE	FALSE	FALSE	FALSE
10	ENTPD1	NP_001767.3	-4.2255	1	0	0	1	0	-1.60575	-0.628984	0.630397	0.0572234	FALSE	FALSE	FALSE	FALSE	FALSE	FALSE	TRUE	FALSE	FALSE	TRUE
12	SINHCAF	NP_067061.1	-4.225	1	0	0	1	0	-1.60525	-0.496767	0.345391	0.0296841	FALSE	FALSE	FALSE	FALSE	FALSE	FALSE	FALSE	FALSE	FALSE	FALSE
19	PAF1	NP_061961.2	-4.225	3	0	0	2	1	-3.04775	-1.28349	1.0984	0.026197	FALSE	FALSE	FALSE	FALSE	FALSE	FALSE	FALSE	FALSE	FALSE	FALSE
1	FASLG	NP_000630.1	-4.2245	1	0	0	1	0	-1.60475	-0.32227	0.367057	0.0189045	FALSE	FALSE	FALSE	FALSE	FALSE	FALSE	FALSE	FALSE	FALSE	FALSE
3	SCN10A	NP_006505.4	-4.2235	7	0	0	2	5	-5.80375	-2.11575	3.5841	0.00612019	FALSE	FALSE	FALSE	FALSE	FALSE	FALSE	FALSE	FALSE	FALSE	TRUE
16	OTOA	NP_733764.1	-4.2235	3	0	0	2	1	-3.50075	-1.71064	1.44518	0.0330658	FALSE	FALSE	FALSE	TRUE	FALSE	FALSE	FALSE	FALSE	FALSE	FALSE
5	GDNF	NP_000505.1	-4.223	1	0	0	1	0	-1.60325	-0.247123	0.283774	0.0109306	FALSE	FALSE	FALSE	FALSE	FALSE	FALSE	FALSE	FALSE	FALSE	TRUE
10	TRIM8	NP_112174.2	-4.2225	5	0	0	3	2	-3.99175	-1.45236	1.48791	0.0130671	FALSE	FALSE	FALSE	FALSE	FALSE	FALSE	TRUE	FALSE	FALSE	TRUE
20	ZHX3	NP_055850.1	-4.2225	5	0	0	3	2	-5.68425	-1.06989	1.16812	0.000246561	FALSE	FALSE	FALSE	FALSE	FALSE	FALSE	FALSE	FALSE	FALSE	FALSE
1	SLC9C2	NP_848622.2	-4.2225	5	0	0	5	0	-5.50725	-1.60621	1.64711	0.00227325	FALSE	FALSE	FALSE	FALSE	FALSE	FALSE	FALSE	FALSE	FALSE	FALSE
17	KCNJ12	NP_066292.2	-4.222	1	0	0	1	0	-1.60225	-2.05086	1.29505	0.230621	FALSE	FALSE	FALSE	FALSE	FALSE	FALSE	FALSE	FALSE	FALSE	FALSE
9	PTBP3	NP_001231826.1	-4.222	3	0	0	1	2	-2.76725	-0.686241	0.746966	0.00973511	FALSE	FALSE	FALSE	FALSE	FALSE	FALSE	FALSE	FALSE	FALSE	FALSE
2	LRRTM4	NP_001128217.1	-4.222	3	0	0	3	0	-3.98175	-0.86334	0.868372	0.00212111	FALSE	FALSE	FALSE	FALSE	FALSE	FALSE	FALSE	FALSE	FALSE	FALSE
1	ROR1	NP_005003.2	-4.221	1	0	0	1	0	-1.60125	-1.27786	1.33596	0.208245	FALSE	FALSE	FALSE	FALSE	FALSE	FALSE	FALSE	FALSE	FALSE	FALSE
1	CACHD1	NP_001280203.1	-4.2205	4	0	0	4	0	-4.644	-1.5626	1.67159	0.00724883	FALSE	FALSE	FALSE	FALSE	FALSE	FALSE	FALSE	FALSE	FALSE	FALSE
X	KLHL4	NP_476503.1	-4.2205	1	0	0	1	0	-1.60075	-0.654276	0.514643	0.0528557	FALSE	FALSE	FALSE	FALSE	FALSE	FALSE	FALSE	FALSE	FALSE	FALSE
7	ARF5	NP_001653.1	-4.22	1	0	0	1	0	-1.60025	-0.48311	0.360961	0.0291103	FALSE	FALSE	FALSE	FALSE	FALSE	FALSE	FALSE	FALSE	FALSE	FALSE
1	CNTN2	NP_005067.1	-4.22	5	0	0	1	4	-3.99225	-1.87201	2.32169	0.0387317	FALSE	FALSE	FALSE	FALSE	FALSE	FALSE	FALSE	FALSE	FALSE	FALSE
5	TCERG1	NP_006697.2	-4.219	6	0	0	4	2	-6.213	-1.55407	1.46746	0.000617073	FALSE	FALSE	FALSE	FALSE	FALSE	FALSE	FALSE	FALSE	FALSE	FALSE
16	CDH8	NP_001787.2	-4.2185	1	0	0	1	0	-1.59875	-1.24405	1.34329	0.184147	FALSE	FALSE	FALSE	FALSE	FALSE	FALSE	FALSE	FALSE	FALSE	FALSE
3	CCNL1	NP_064703.1	-4.2165	3	0	0	3	0	-3.86625	-0.858048	0.84249	0.00254044	FALSE	FALSE	FALSE	FALSE	FALSE	FALSE	FALSE	FALSE	FALSE	FALSE
9	TEX10	NP_060216.2	-4.2165	6	0	0	4	2	-5.782	-1.30834	1.43573	0.000542625	FALSE	FALSE	FALSE	FALSE	FALSE	FALSE	FALSE	FALSE	FALSE	FALSE
2	PAX3	NP_852122.1	-4.216	4	0	0	2	2	-3.831	-0.820203	0.885524	0.00261667	FALSE	FALSE	FALSE	FALSE	FALSE	FALSE	TRUE	FALSE	FALSE	TRUE
1	SPRTN	NP_114407.3	-4.216	1	0	0	1	0	-1.59625	-0.779876	0.821917	0.0865165	FALSE	FALSE	FALSE	FALSE	FALSE	FALSE	TRUE	FALSE	FALSE	TRUE
17	THRA	NP_955366.1	-4.216	2	0	0	2	0	-2.884	-1.21175	0.936723	0.0254809	FALSE	FALSE	FALSE	FALSE	FALSE	FALSE	TRUE	FALSE	FALSE	TRUE
13	SLC25A15	NP_055067.1	-4.2155	1	0	0	1	0	-1.59575	-0.506006	0.531448	0.0416571	FALSE	FALSE	FALSE	FALSE	FALSE	FALSE	TRUE	FALSE	FALSE	TRUE
8	ESRP1	NP_060167.2	-4.214	2	0	0	2	0	-2.8895	-1.10413	1.08301	0.0269604	FALSE	FALSE	FALSE	FALSE	FALSE	FALSE	FALSE	FALSE	FALSE	FALSE
7	IGF2BP3	NP_006538.2	-4.2135	1	0	0	1	0	-1.59375	-0.952808	0.884399	0.110971	FALSE	FALSE	FALSE	FALSE	FALSE	FALSE	FALSE	FALSE	FALSE	FALSE
4	CDS1	NP_001254.2	-4.213	1	0	0	1	0	-1.59325	-0.706217	0.602158	0.0636342	FALSE	FALSE	FALSE	FALSE	FALSE	FALSE	FALSE	FALSE	FALSE	FALSE
3	USF3	NP_001009899.3	-4.213	6	0	0	3	3	-5.5715	-2.42965	3.35644	0.0179354	FALSE	FALSE	FALSE	FALSE	FALSE	FALSE	FALSE	FALSE	FALSE	FALSE
1	TRIM11	NP_660215.1	-4.213	3	0	0	3	0	-3.68575	-1.11106	1.33353	0.00977426	FALSE	FALSE	FALSE	FALSE	FALSE	FALSE	FALSE	FALSE	FALSE	FALSE
17	SSH2	NP_203747.2	-4.213	4	0	0	3	1	-4.1325	-1.949	1.75891	0.0248001	FALSE	FALSE	FALSE	FALSE	FALSE	FALSE	FALSE	FALSE	FALSE	FALSE
19	HRC	NP_002143.1	-4.2125	1	0	0	1	0	-1.59275	-0.512719	0.787224	0.0468341	FALSE	FALSE	FALSE	FALSE	FALSE	FALSE	FALSE	FALSE	FALSE	FALSE
X	GDI1	NP_001484.1	-4.2115	2	0	0	2	0	-2.6565	-0.899141	0.570616	0.0130264	FALSE	FALSE	FALSE	FALSE	FALSE	FALSE	TRUE	FALSE	FALSE	TRUE
6	NFKBIE	NP_004547.3	-4.211	1	0	0	1	0	-1.81425	-0.8174	0.826996	0.0628409	FALSE	FALSE	FALSE	FALSE	FALSE	FALSE	FALSE	FALSE	FALSE	FALSE
17	RBFOX3	NP_001076044.1	-4.211	1	0	0	1	0	-1.59125	-0.789425	0.902462	0.0929826	FALSE	FALSE	FALSE	FALSE	FALSE	FALSE	FALSE	FALSE	FALSE	FALSE
6	STK38	NP_001292031.1	-4.2105	3	0	0	3	0	-4.20075	-0.620211	0.492422	0.000403399	FALSE	FALSE	FALSE	FALSE	FALSE	FALSE	FALSE	FALSE	FALSE	FALSE
2	ERICH2	NP_001276876.1	-4.2105	1	0	0	1	0	-1.59075	-0.181366	0.19917	0.00631875	FALSE	FALSE	FALSE	FALSE	FALSE	FALSE	FALSE	FALSE	FALSE	FALSE
4	RASGEF1B	NP_689758.1	-4.2095	2	0	0	2	0	-2.3785	-0.642952	0.808756	0.0175208	FALSE	FALSE	FALSE	FALSE	FALSE	FALSE	FALSE	FALSE	FALSE	FALSE
18	RTTN	NP_775901.3	-4.2095	5	0	0	2	3	-3.76725	-2.61031	3.49623	0.151408	FALSE	FALSE	FALSE	FALSE	FALSE	FALSE	TRUE	FALSE	FALSE	TRUE
8	VPS28	NP_898880.1	-4.2085	2	0	0	2	0	-2.96	-0.45887	0.524395	0.0020222	FALSE	FALSE	FALSE	FALSE	FALSE	FALSE	FALSE	FALSE	FALSE	FALSE
14	KLC1	NP_001123579.1	-4.2075	1	0	0	1	0	-1.58775	-1.29661	1.02803	0.160464	FALSE	FALSE	FALSE	FALSE	FALSE	FALSE	FALSE	FALSE	FALSE	FALSE
19	MYO9B	NP_004136.2	-4.207	8	0	0	3	5	-5.933	-3.9769	4.99645	0.0944391	FALSE	FALSE	FALSE	FALSE	FALSE	FALSE	FALSE	FALSE	FALSE	FALSE
12	GPRC5D	NP_061124.1	-4.207	4	0	0	2	2	-3.99	-0.415313	0.601481	0.00010133	FALSE	FALSE	FALSE	FALSE	FALSE	FALSE	FALSE	FALSE	FALSE	FALSE
6	VARS1	NP_006286.1	-4.2065	2	0	0	1	1	-2.136	-2.03796	2.2426	0.283685	FALSE	FALSE	FALSE	FALSE	FALSE	FALSE	FALSE	FALSE	FALSE	FALSE
3	CPOX	NP_000088.3	-4.2065	2	0	0	1	1	-1.732	-0.517776	0.540157	0.0322963	FALSE	FALSE	FALSE	FALSE	FALSE	FALSE	FALSE	FALSE	FALSE	TRUE
8	SDCBP	NP_001007068.1	-4.2065	3	0	0	2	1	-3.03325	-0.398003	0.518398	0.00122078	FALSE	FALSE	FALSE	FALSE	FALSE	FALSE	FALSE	FALSE	FALSE	FALSE
11	RAD9A	NP_001230153.1	-4.206	2	0	0	1	1	-1.5525	-0.364698	0.694488	0.0258989	FALSE	FALSE	FALSE	FALSE	FALSE	FALSE	FALSE	FALSE	FALSE	FALSE
1	NUF2	NP_113611.2	-4.205	1	0	0	1	0	-1.58525	-0.734689	0.717915	0.0787823	FALSE	FALSE	FALSE	FALSE	FALSE	FALSE	FALSE	FALSE	FALSE	FALSE
14	NKX2-1	NP_001073136.1	-4.2045	3	0	0	2	1	-2.83825	-0.822015	0.928355	0.0147252	FALSE	FALSE	FALSE	FALSE	FALSE	FALSE	TRUE	FALSE	FALSE	TRUE
22	RTL10	NP_078903.3	-4.2045	1	0	0	1	0	-1.58475	-0.43975	0.699677	0.0312234	FALSE	FALSE	FALSE	FALSE	FALSE	TRUE	FALSE	FALSE	FALSE	FALSE
16	CKLF	NP_058647.1	-4.204	1	0	0	1	0	-1.58425	-0.223495	0.260932	0.00929433	FALSE	FALSE	FALSE	FALSE	FALSE	FALSE	FALSE	FALSE	FALSE	FALSE
2	TACR1	NP_001049.1	-4.204	1	0	0	1	0	-1.67525	-0.4704	0.640956	0.0319292	FALSE	FALSE	FALSE	FALSE	FALSE	FALSE	FALSE	FALSE	FALSE	FALSE
2	KLHL23	NP_653312.2	-4.204	1	0	0	1	0					FALSE	FALSE	FALSE	FALSE	FALSE	FALSE	FALSE	FALSE	FALSE	FALSE
1	TLR5	NP_003259.2	-4.204	2	0	0	1	1	-2.0175	-0.86675	1.28053	0.0682443	FALSE	FALSE	FALSE	FALSE	FALSE	FALSE	FALSE	FALSE	FALSE	FALSE
5	RASGRF2	NP_008840.1	-4.203	3	0	0	2	1	-2.87075	-2.43501	2.42455	0.185567	FALSE	FALSE	FALSE	FALSE	FALSE	FALSE	FALSE	FALSE	FALSE	FALSE
19	SPACA4	NP_598005.1	-4.203	1	0	0	1	0	-1.58325	-0.215012	0.280538	0.00775487	FALSE	FALSE	FALSE	FALSE	FALSE	FALSE	FALSE	FALSE	FALSE	FALSE
3	TMEM207	NP_997199.1	-4.203	2	0	0	1	1	-2.62875	-0.152246	0.237648	0.000239908	FALSE	FALSE	FALSE	FALSE	FALSE	FALSE	FALSE	FALSE	FALSE	FALSE
1	PLEKHM2	NP_055979.2	-4.2025	5	0	0	3	2	-4.61275	-1.7909	2.34606	0.0150682	FALSE	FALSE	FALSE	FALSE	FALSE	FALSE	FALSE	FALSE	FALSE	FALSE
2	LCT	NP_002290.2	-4.202	8	0	0	6	2	-10.1387	-3.21137	3.62521	0.00024983	FALSE	FALSE	FALSE	FALSE	FALSE	FALSE	FALSE	FALSE	FALSE	FALSE
19	LONP1	NP_004784.2	-4.202	4	0	0	3	1	-4.5045	-0.954179	1.86121	0.00225865	FALSE	FALSE	FALSE	FALSE	FALSE	TRUE	TRUE	FALSE	FALSE	TRUE
21	HUNK	NP_055401.1	-4.2015	3	0	0	1	2	-2.58275	-1.00533	1.14749	0.0370546	FALSE	FALSE	FALSE	FALSE	FALSE	FALSE	FALSE	FALSE	FALSE	FALSE
1	PAQR7	NP_848509.1	-4.201	1	0	0	1	0	-1.53925	-0.603174	0.677585	0.0656741	FALSE	FALSE	FALSE	FALSE	FALSE	FALSE	FALSE	FALSE	FALSE	FALSE
10	IDE	NP_004960.2	-4.2005	5	0	0	2	3	-5.26075	-1.39502	1.47484	0.00184834	FALSE	FALSE	FALSE	FALSE	FALSE	FALSE	FALSE	FALSE	FALSE	FALSE
10	ZRANB1	NP_060050.2	-4.2	3	0	0	3	0	-3.24875	-1.22774	1.24349	0.021083	FALSE	FALSE	FALSE	FALSE	FALSE	FALSE	FALSE	FALSE	FALSE	FALSE
2	CUL3	NP_003581.1	-4.2	2	0	0	2	0	-2.9935	-1.75038	1.27118	0.0484667	FALSE	FALSE	FALSE	FALSE	FALSE	FALSE	TRUE	FALSE	FALSE	TRUE
15	TNFAIP8L3	NP_997264.2	-4.1995	1	0	0	1	0	-1.57975	-0.33553	0.370963	0.021073	FALSE	FALSE	FALSE	FALSE	FALSE	FALSE	FALSE	FALSE	FALSE	FALSE
2	GIGYF2	NP_001096616.1	-4.1995	3	0	0	3	0	-3.73125	-2.25025	2.31636	0.0774732	FALSE	FALSE	FALSE	FALSE	FALSE	FALSE	FALSE	FALSE	FALSE	TRUE
1	SSBP3	NP_001009955.1	-4.1995	3	0	0	2	1	-1.62775	-0.592335	0.737614	0.052353	FALSE	FALSE	FALSE	FALSE	FALSE	FALSE	FALSE	FALSE	FALSE	FALSE
16	KAT8	NP_892003.2	-4.1995	5	0	0	4	1	-6.15475	-0.879887	0.800079	3.83632e-05	FALSE	FALSE	FALSE	FALSE	FALSE	FALSE	FALSE	FALSE	FALSE	FALSE
15	USP8	NP_005145.3	-4.1995	1	0	0	1	0	-3.954	-1.92385	1.778	0.0287484	FALSE	FALSE	FALSE	FALSE	FALSE	FALSE	FALSE	FALSE	FALSE	FALSE
6	CILK1	NP_057597.2	-4.199	1	0	0	1	0	-1.57925	-0.585241	0.635751	0.0573663	FALSE	FALSE	FALSE	FALSE	FALSE	FALSE	FALSE	FALSE	FALSE	TRUE
5	ZFR	NP_057191.2	-4.199	3	0	0	2	1	-3.58075	-2.23957	1.80838	0.0557419	FALSE	FALSE	FALSE	FALSE	FALSE	FALSE	FALSE	FALSE	FALSE	FALSE
12	TRHDE	NP_037513.2	-4.198	1	0	0	1	0	-1.49225	-1.86149	2.05025	0.38686	FALSE	FALSE	FALSE	FALSE	FALSE	FALSE	FALSE	FALSE	FALSE	FALSE
7	ACTL6B	NP_057272.1	-4.1975	6	0	0	5	1	-8.381	-1.10824	0.937128	1.63845e-06	TRUE	FALSE	TRUE	FALSE	FALSE	FALSE	TRUE	FALSE	FALSE	TRUE
16	COG7	NP_705831.1	-4.197	4	0	0	1	3	-2.7205	-1.1021	1.46956	0.0425678	FALSE	FALSE	FALSE	FALSE	FALSE	FALSE	TRUE	FALSE	FALSE	TRUE
11	UVRAG	NP_003360.2	-4.1965	5	0	0	3	2	-4.27025	-1.01937	1.23113	0.00244688	FALSE	FALSE	FALSE	FALSE	FALSE	FALSE	FALSE	FALSE	FALSE	FALSE
17	SMURF2	NP_073576.1	-4.196	1	0	0	1	0	-1.57625	-1.23197	0.966966	0.14374	FALSE	FALSE	FALSE	FALSE	FALSE	FALSE	FALSE	FALSE	FALSE	FALSE
22	XRCC6	NP_001460.1	-4.196	1	0	0	1	0	-1.53225	-1.14546	1.01283	0.155549	FALSE	FALSE	FALSE	FALSE	FALSE	FALSE	FALSE	FALSE	FALSE	FALSE
2	CAPN10	NP_075573.3	-4.196	2	0	0	2	0	-2.2145	-0.504245	1.20412	0.0173385	FALSE	FALSE	FALSE	FALSE	FALSE	FALSE	TRUE	FALSE	FALSE	TRUE
18	NEDD4L	NP_056092.2	-4.196	5	0	0	5	0	-7.46925	-1.26613	1.00799	1.97195e-05	FALSE	FALSE	FALSE	FALSE	FALSE	FALSE	TRUE	FALSE	FALSE	TRUE
12	SLC11A2	NP_000608.1	-4.195	2	0	0	2	0	-2.7345	-0.714728	0.713426	0.0107992	FALSE	FALSE	FALSE	FALSE	FALSE	FALSE	FALSE	FALSE	FALSE	FALSE
5	CDHR2	NP_060145.3	-4.195	3	0	0	2	1	-2.88575	-1.82157	2.83774	0.140836	FALSE	FALSE	FALSE	FALSE	FALSE	FALSE	FALSE	FALSE	FALSE	FALSE
3	NR1D2	NP_005117.3	-4.195	2	0	0	2	0	-3.0425	-0.73243	0.963336	0.00783213	FALSE	FALSE	FALSE	FALSE	FALSE	FALSE	FALSE	FALSE	FALSE	FALSE
12	TBX5	NP_000183.2	-4.194	1	0	0	1	0	-1.57425	-0.690423	0.748638	0.078167	FALSE	FALSE	FALSE	FALSE	FALSE	FALSE	TRUE	FALSE	FALSE	TRUE
13	MTMR6	NP_004676.3	-4.1935	1	0	0	1	0	-1.57375	-0.739792	0.764221	0.0850896	FALSE	FALSE	FALSE	FALSE	FALSE	FALSE	FALSE	FALSE	FALSE	FALSE
13	KBTBD6	NP_690867.3	-4.1935	3	0	0	3	0	-3.69775	-1.44094	1.26691	0.0162099	FALSE	FALSE	FALSE	FALSE	FALSE	FALSE	FALSE	FALSE	FALSE	FALSE
17	SCN4A	NP_000325.4	-4.1925	4	0	0	3	1	-3.7285	-2.22841	3.28434	0.103079	FALSE	FALSE	FALSE	FALSE	FALSE	FALSE	TRUE	FALSE	FALSE	TRUE
14	KLHDC2	NP_055130.1	-4.192	2	0	0	1	1	-1.7275	-0.638962	0.703398	0.0508821	FALSE	FALSE	FALSE	FALSE	FALSE	FALSE	FALSE	FALSE	FALSE	FALSE
6	FILIP1	NP_056502.1	-4.192	3	0	0	2	1	-2.96825	-1.75909	1.98031	0.0964794	FALSE	FALSE	FALSE	FALSE	FALSE	FALSE	FALSE	FALSE	FALSE	FALSE
X	ENOX2	NP_872114.1	-4.1915	1	0	0	1	0	-1.82025	-0.679603	0.631717	0.0430905	FALSE	FALSE	FALSE	FALSE	FALSE	FALSE	FALSE	FALSE	FALSE	FALSE
2	TIA1	NP_071505.2	-4.1915	1	0	0	1	0	-1.57175	-0.501612	0.535287	0.041107	FALSE	FALSE	FALSE	FALSE	FALSE	FALSE	FALSE	FALSE	FALSE	FALSE
11	PPP1CA	NP_001008709.1	-4.1915	1	0	0	1	0	-1.57175	-0.822558	0.68549	0.0806547	FALSE	FALSE	FALSE	FALSE	FALSE	FALSE	FALSE	FALSE	FALSE	FALSE
2	GTF3C2	NP_001512.1	-4.19	4	0	0	2	2	-4.963	-1.64197	1.49359	0.00457286	FALSE	FALSE	FALSE	FALSE	FALSE	FALSE	FALSE	FALSE	FALSE	FALSE
7	LANCL2	NP_061167.1	-4.19	1	0	0	1	0	-1.57025	-0.552407	0.789012	0.0572207	FALSE	FALSE	FALSE	FALSE	FALSE	FALSE	FALSE	FALSE	FALSE	FALSE
3	POGLUT1	NP_689518.1	-4.1895	1	0	0	1	0	-1.56975	-0.544376	0.561105	0.0489824	FALSE	FALSE	FALSE	FALSE	FALSE	FALSE	FALSE	FALSE	FALSE	FALSE
12	IRAK4	NP_057207.2	-4.189	1	0	0	1	0	-1.56925	-0.440743	0.443405	0.0323711	FALSE	FALSE	FALSE	FALSE	FALSE	FALSE	FALSE	FALSE	FALSE	FALSE
X	FAM199X	NP_997201.1	-4.189	1	0	0	1	0	-1.56925	-0.594884	0.394161	0.0388099	FALSE	FALSE	FALSE	FALSE	FALSE	FALSE	FALSE	FALSE	FALSE	FALSE
1	GIPC2	NP_060125.4	-4.189	1	0	0	1	0	-1.56925	-0.339713	0.549775	0.0224251	FALSE	FALSE	FALSE	FALSE	FALSE	FALSE	FALSE	FALSE	FALSE	FALSE
15	APBA2	NP_005494.2	-4.1885	1	0	0	1	0	-1.56875	-1.11814	1.41562	0.194848	FALSE	FALSE	FALSE	FALSE	FALSE	FALSE	FALSE	FALSE	FALSE	FALSE
10	LHPP	NP_071409.3	-4.188	3	0	0	2	1	-2.58775	-0.326881	0.651056	0.0016366	FALSE	FALSE	FALSE	FALSE	FALSE	FALSE	FALSE	FALSE	FALSE	FALSE
10	PCGF5	NP_001243478.1	-4.188	2	0	0	2	0	-3.03	-0.620731	0.363332	0.00283377	FALSE	FALSE	FALSE	FALSE	FALSE	FALSE	FALSE	FALSE	FALSE	FALSE
1	KCNC4	NP_004969.2	-4.188	3	0	0	3	0	-3.47225	-1.09187	1.38068	0.0130239	FALSE	FALSE	FALSE	FALSE	FALSE	FALSE	FALSE	FALSE	FALSE	FALSE
8	PTDSS1	NP_055569.1	-4.1875	2	0	0	1	1	-2.311	-0.750389	0.719774	0.0247293	FALSE	FALSE	FALSE	FALSE	FALSE	FALSE	TRUE	FALSE	FALSE	TRUE
12	PTGES3	NP_001269533.1	-4.187	1	0	0	1	0	-1.56725	-0.24089	0.23344	0.0110575	FALSE	FALSE	FALSE	FALSE	FALSE	FALSE	FALSE	FALSE	FALSE	FALSE
12	BICDL1	NP_001354815.1	-4.186	1	0	0	1	0	-1.42025	-0.908963	1.42713	0.170119	FALSE	FALSE	FALSE	FALSE	FALSE	FALSE	FALSE	FALSE	FALSE	FALSE
14	PACS2	NP_001094383.2	-4.1855	18	0	0	16	2	-23.943	-1.41599	2.25169	0	TRUE	FALSE	TRUE	FALSE	FALSE	FALSE	TRUE	TRUE	TRUE	TRUE
10	KIAA1217	NP_062536.2	-4.185	2	0	0	1	1	-2.0505	-1.9761	3.37403	0.370726	FALSE	FALSE	FALSE	FALSE	FALSE	FALSE	FALSE	FALSE	FALSE	FALSE
X	GPR173	NP_061842.1	-4.185	3	0	0	3	0	-3.93525	-0.694866	0.486139	0.000850967	FALSE	FALSE	FALSE	FALSE	FALSE	FALSE	FALSE	FALSE	FALSE	FALSE
7	CYP3A43	NP_073731.1	-4.1845	1	0	0	1	0	-1.73325	-0.520357	0.698049	0.0371071	FALSE	FALSE	FALSE	FALSE	FALSE	FALSE	FALSE	FALSE	FALSE	FALSE
22	YWHAH	NP_003396.1	-4.1845	1	0	0	1	0	-1.95525	-0.654838	0.504713	0.0271413	FALSE	FALSE	FALSE	FALSE	FALSE	FALSE	FALSE	FALSE	FALSE	FALSE
8	CHRNA2	NP_000733.2	-4.184	3	0	0	1	2	-2.27225	-0.68112	1.06851	0.0243235	FALSE	FALSE	FALSE	FALSE	FALSE	FALSE	TRUE	FALSE	FALSE	TRUE
6	ASF1A	NP_054753.1	-4.184	2	0	0	2	0	-3.0675	-0.435623	0.312434	0.00129178	FALSE	FALSE	FALSE	FALSE	FALSE	FALSE	FALSE	FALSE	FALSE	FALSE
12	ZC3H10	NP_116175.1	-4.184	3	0	0	2	1	-3.13525	-0.845851	0.803976	0.00840257	FALSE	FALSE	FALSE	FALSE	FALSE	FALSE	FALSE	FALSE	FALSE	FALSE
4	LCORL	NP_001159611.1	-4.1835	1	0	0	1	0	-1.56375	-0.915994	0.93555	0.125717	FALSE	FALSE	FALSE	FALSE	FALSE	FALSE	FALSE	FALSE	FALSE	FALSE
9	TRPM3	NP_001353076.1	-4.1835	15	0	0	13	2	-19.663	-3.24604	3.43754	6.44825e-11	TRUE	FALSE	TRUE	FALSE	FALSE	FALSE	TRUE	TRUE	TRUE	TRUE
11	EML3	NP_001287722.1	-4.183	1	0	0	1	0	-1.56325	-1.35825	1.5683	0.258636	FALSE	FALSE	FALSE	FALSE	FALSE	FALSE	FALSE	FALSE	FALSE	FALSE
17	MINK1	NP_722549.2	-4.183	3	0	0	2	1	-3.27775	-2.81284	3.01946	0.203614	FALSE	FALSE	FALSE	FALSE	FALSE	FALSE	FALSE	FALSE	FALSE	FALSE
2	SPATS2L	NP_001269673.1	-4.1825	3	0	0	2	1	-3.13525	-0.869047	0.94925	0.0100588	FALSE	FALSE	FALSE	FALSE	FALSE	FALSE	FALSE	FALSE	FALSE	FALSE
10	ZSWIM8	NP_001229417.1	-4.182	6	0	0	6	0	-7.3555	-4.97894	3.83186	0.0232247	FALSE	FALSE	FALSE	FALSE	FALSE	FALSE	FALSE	FALSE	FALSE	FALSE
14	FBLN5	NP_001371088.1	-4.182	2	0	0	2	0	-3.0955	-0.880367	0.993277	0.0113831	FALSE	FALSE	FALSE	FALSE	FALSE	FALSE	FALSE	FALSE	FALSE	FALSE
19	ARHGAP33	NP_443180.2	-4.182	1	0	0	1	0	-1.56225	-1.53826	1.80042	0.30896	FALSE	FALSE	FALSE	FALSE	FALSE	FALSE	FALSE	FALSE	FALSE	FALSE
8	SQLE	NP_003120.2	-4.181	1	0	0	1	0	-1.69225	-0.891451	0.944365	0.0953671	FALSE	FALSE	FALSE	FALSE	FALSE	FALSE	FALSE	FALSE	FALSE	FALSE
4	TET2	NP_001120680.1	-4.181	2	0	0	1	1	-2.1965	-2.32403	3.04257	0.390632	FALSE	FALSE	FALSE	FALSE	FALSE	FALSE	FALSE	FALSE	FALSE	FALSE
18	ALPK2	NP_443179.3	-4.181	6	0	0	4	2	-5.1105	-2.72087	3.48587	0.045553	FALSE	FALSE	FALSE	FALSE	FALSE	FALSE	FALSE	FALSE	FALSE	FALSE
19	MLLT1	NP_005925.2	-4.18	2	0	0	1	1	-2.0065	-1.29645	1.37965	0.122201	FALSE	FALSE	FALSE	FALSE	FALSE	FALSE	FALSE	FALSE	FALSE	FALSE
6	TMEM151B	NP_001131032.1	-4.18	1	0	0	1	0	-1.56025	-1.22668	1.57544	0.228927	FALSE	FALSE	FALSE	FALSE	FALSE	FALSE	FALSE	FALSE	FALSE	FALSE
12	ABTB3	NP_001017523.1	-4.1795	1	0	0	1	0	-1.55975	-0.898498	1.39434	0.137511	FALSE	FALSE	FALSE	FALSE	FALSE	FALSE	FALSE	FALSE	FALSE	FALSE
2	BMPR2	NP_001195.2	-4.1795	4	0	0	4	0	-6.111	-1.71674	1.69174	0.00121022	FALSE	FALSE	FALSE	FALSE	FALSE	FALSE	FALSE	FALSE	FALSE	FALSE
12	KIF21A	NP_060111.2	-4.1795	5	0	0	5	0	-6.31675	-2.54601	2.61434	0.00674235	FALSE	FALSE	FALSE	FALSE	FALSE	FALSE	FALSE	FALSE	FALSE	FALSE
5	IL6ST	NP_002175.2	-4.179	3	0	0	3	0	-3.80175	-1.08255	1.1801	0.00684498	FALSE	FALSE	FALSE	FALSE	FALSE	FALSE	FALSE	FALSE	FALSE	FALSE
15	CSK	NP_004374.1	-4.1785	1	0	0	1	0	-1.55875	-1.01962	0.664296	0.0812013	FALSE	FALSE	FALSE	FALSE	FALSE	FALSE	FALSE	FALSE	FALSE	FALSE
3	TATDN2	NP_055575.3	-4.1785	5	0	0	3	2	-4.11925	-0.782432	1.08805	0.0010206	FALSE	FALSE	FALSE	FALSE	FALSE	FALSE	FALSE	FALSE	FALSE	FALSE
22	PATZ1	NP_055138.2	-4.1785	1	0	0	1	0	-2.9805	-1.71475	1.66054	0.0694563	FALSE	FALSE	FALSE	FALSE	FALSE	FALSE	FALSE	FALSE	FALSE	FALSE
7	KLHL7	NP_001026880.2	-4.178	4	0	0	4	0	-5.1395	-1.28969	0.96434	0.00107266	FALSE	FALSE	FALSE	FALSE	FALSE	FALSE	TRUE	FALSE	FALSE	TRUE
17	ATXN7L3	NP_001369245.1	-4.178	2	0	0	2	0	-3.6615	-0.835977	0.752659	0.00310708	FALSE	FALSE	FALSE	FALSE	FALSE	FALSE	FALSE	FALSE	FALSE	FALSE
5	SOX30	NP_848511.1	-4.178	1	0	0	1	0	-1.55825	-0.750519	0.998955	0.0971496	FALSE	FALSE	FALSE	FALSE	FALSE	FALSE	FALSE	FALSE	FALSE	FALSE
17	GGNBP2	NP_079111.1	-4.178	3	0	0	3	0	-4.133	-1.33873	1.21708	0.00708332	FALSE	FALSE	FALSE	FALSE	FALSE	FALSE	FALSE	FALSE	FALSE	FALSE
5	CDC23	NP_004652.2	-4.178	4	0	0	2	2	-3.746	-1.00436	0.957528	0.00527172	FALSE	FALSE	FALSE	FALSE	FALSE	FALSE	FALSE	FALSE	FALSE	FALSE
18	DOK6	NP_689934.2	-4.1775	1	0	0	1	0	-1.55775	-0.575292	0.559614	0.0525873	FALSE	FALSE	FALSE	FALSE	FALSE	FALSE	FALSE	FALSE	FALSE	FALSE
11	DDB1	NP_001914.3	-4.1775	4	0	0	4	0	-5.8	-2.07335	1.52554	0.00242279	FALSE	FALSE	FALSE	FALSE	FALSE	FALSE	TRUE	FALSE	FALSE	TRUE
18	RELCH	NP_065905.2	-4.1775	5	0	0	4	1	-4.72225	-2.38291	2.12211	0.0247529	FALSE	FALSE	FALSE	FALSE	FALSE	FALSE	FALSE	FALSE	FALSE	FALSE
6	TDP2	NP_057698.2	-4.1775	2	0	0	2	0	-2.584	-0.38311	0.578681	0.00322995	FALSE	FALSE	FALSE	FALSE	FALSE	FALSE	FALSE	FALSE	FALSE	FALSE
13	DIAPH3	NP_001035982.1	-4.177	2	0	0	1	1	-2.0445	-1.33206	1.57332	0.145676	FALSE	FALSE	FALSE	FALSE	FALSE	FALSE	FALSE	FALSE	FALSE	FALSE
1	NRAS	NP_002515.1	-4.177	1	0	0	1	0	-1.55725	-0.336224	0.276537	0.0190676	FALSE	FALSE	FALSE	FALSE	FALSE	FALSE	TRUE	FALSE	FALSE	TRUE
2	PLEKHA3	NP_061964.3	-4.1765	2	0	0	2	0	-2.4575	-0.511534	0.439984	0.00759241	FALSE	FALSE	FALSE	FALSE	FALSE	FALSE	FALSE	FALSE	FALSE	FALSE
15	TUBGCP5	NP_443135.3	-4.176	2	0	0	1	1	-2.109	-1.34272	1.74685	0.150062	FALSE	FALSE	FALSE	FALSE	FALSE	FALSE	FALSE	FALSE	FALSE	FALSE
2	DCAF17	NP_079276.2	-4.1755	4	0	0	3	1	-4.986	-0.72948	0.840669	0.000112134	FALSE	FALSE	FALSE	FALSE	FALSE	FALSE	TRUE	FALSE	FALSE	TRUE
19	POU2F2	NP_001193954.1	-4.1755	2	0	0	2	0	-3.0455	-1.15454	0.859403	0.0163196	FALSE	FALSE	FALSE	FALSE	FALSE	FALSE	FALSE	FALSE	FALSE	FALSE
11	PTDSS2	NP_110410.1	-4.175	2	0	0	2	0	-3.0545	-0.932447	1.014	0.0141485	FALSE	FALSE	FALSE	FALSE	FALSE	FALSE	FALSE	FALSE	FALSE	FALSE
1	PSMB2	NP_002785.1	-4.175	2	0	0	1	1	-2.2435	-0.325666	0.424045	0.00401742	FALSE	FALSE	FALSE	FALSE	FALSE	FALSE	FALSE	FALSE	FALSE	FALSE
14	MTA1	NP_001190187.1	-4.1745	2	0	0	2	0	-2.884	-1.26431	0.966793	0.0286006	FALSE	FALSE	FALSE	FALSE	FALSE	FALSE	FALSE	FALSE	FALSE	FALSE
X	CUL4B	NP_003579.3	-4.1745	1	0	0	1	0	-1.55475	-1.18396	0.594256	0.0819431	FALSE	FALSE	FALSE	FALSE	FALSE	FALSE	TRUE	FALSE	FALSE	TRUE
X	LONRF3	NP_001027026.1	-4.1735	2	0	0	1	1	-2.183	-0.894407	0.796535	0.04093	FALSE	FALSE	FALSE	FALSE	FALSE	FALSE	FALSE	FALSE	FALSE	FALSE
3	TKT	NP_001128527.1	-4.1735	1	0	0	1	0	-1.55375	-0.933076	1.40951	0.154628	FALSE	FALSE	FALSE	FALSE	FALSE	FALSE	TRUE	FALSE	FALSE	TRUE
16	SNTB2	NP_006741.1	-4.173	2	0	0	1	1	-1.5695	-0.932986	0.990755	0.121362	FALSE	FALSE	FALSE	FALSE	FALSE	FALSE	FALSE	FALSE	FALSE	FALSE
2	MOB4	NP_056202.2	-4.173	1	0	0	1	0	-1.55325	-0.518364	0.349213	0.0329669	FALSE	FALSE	FALSE	FALSE	FALSE	FALSE	FALSE	FALSE	FALSE	FALSE
1	KIF26B	NP_060482.2	-4.173	4	0	0	2	2	-3.153	-2.96328	4.95686	0.361901	FALSE	FALSE	FALSE	FALSE	FALSE	FALSE	FALSE	FALSE	FALSE	FALSE
14	CDH24	NP_071923.2	-4.173	5	0	0	3	2	-4.58125	-1.29463	2.06636	0.00459497	FALSE	FALSE	FALSE	FALSE	FALSE	FALSE	FALSE	FALSE	FALSE	FALSE
X	TRPC5	NP_036603.1	-4.172	2	0	0	2	0	-2.5985	-1.22636	0.774424	0.0288309	FALSE	FALSE	FALSE	FALSE	FALSE	FALSE	FALSE	FALSE	FALSE	FALSE
16	THAP11	NP_065190.2	-4.172	1	0	0	1	0	-1.55225	-0.943096	0.896258	0.120069	FALSE	FALSE	FALSE	FALSE	FALSE	FALSE	FALSE	FALSE	FALSE	FALSE
10	SGPL1	NP_003892.2	-4.172	1	0	0	1	0	-1.55225	-0.726789	0.759652	0.0845529	FALSE	FALSE	FALSE	FALSE	FALSE	FALSE	FALSE	FALSE	FALSE	FALSE
20	EFCAB8	NP_001137439.1	-4.172	1	0	0	1	0	0	-0.866755	0.922811	1	FALSE	FALSE	FALSE	FALSE	FALSE	FALSE	FALSE	FALSE	FALSE	FALSE
14	MED6	NP_001271138.1	-4.1715	2	0	0	2	0	-2.8065	-0.365726	0.309363	0.00155826	FALSE	FALSE	FALSE	FALSE	FALSE	FALSE	FALSE	FALSE	FALSE	FALSE
12	C1S	NP_958850.1	-4.171	1	0	0	1	0	-1.55125	-0.901908	1.14235	0.138997	FALSE	FALSE	FALSE	FALSE	FALSE	FALSE	FALSE	FALSE	FALSE	FALSE
5	CLK4	NP_065717.1	-4.171	1	0	0	1	0	-1.77025	-0.709129	0.94375	0.057892	FALSE	FALSE	FALSE	FALSE	FALSE	FALSE	FALSE	FALSE	FALSE	FALSE
1	CAMSAP2	NP_001284636.1	-4.17	3	0	0	3	0	-3.70875	-2.39902	2.36935	0.0888382	FALSE	FALSE	FALSE	FALSE	FALSE	FALSE	FALSE	FALSE	FALSE	FALSE
10	SLC25A16	NP_689920.1	-4.169	1	0	0	1	0	-1.54925	-0.441823	0.533282	0.0372697	FALSE	FALSE	FALSE	FALSE	FALSE	FALSE	FALSE	FALSE	FALSE	FALSE
10	LDB1	NP_001106878.1	-4.169	3	0	0	3	0	-4.45725	-0.970244	0.843777	0.00127324	FALSE	FALSE	FALSE	FALSE	FALSE	FALSE	FALSE	FALSE	FALSE	FALSE
16	AARS1	NP_001596.2	-4.1685	2	0	0	2	0	-2.4535	-1.21213	1.71001	0.0804676	FALSE	FALSE	FALSE	FALSE	FALSE	FALSE	TRUE	FALSE	FALSE	TRUE
X	DIAPH2	NP_006720.1	-4.1685	3	0	0	2	1	-2.65125	-1.21653	0.891682	0.0314147	FALSE	FALSE	FALSE	FALSE	FALSE	FALSE	FALSE	FALSE	FALSE	FALSE
2	PTPN4	NP_002821.1	-4.168	1	0	0	1	0	-1.54825	-1.50918	1.44451	0.251756	FALSE	FALSE	FALSE	FALSE	FALSE	FALSE	FALSE	FALSE	FALSE	FALSE
4	HMGB2	NP_001124160.1	-4.168	1	0	0	1	0	-1.54825	-0.409191	0.379419	0.0262757	FALSE	FALSE	FALSE	FALSE	FALSE	FALSE	FALSE	FALSE	FALSE	FALSE
3	SMARCC1	NP_003065.3	-4.168	4	0	0	2	2	-4.058	-1.69143	1.67811	0.0198273	FALSE	FALSE	FALSE	FALSE	FALSE	FALSE	FALSE	FALSE	FALSE	FALSE
11	LRP4	NP_002325.2	-4.1675	5	0	0	4	1	-6.3145	-3.46733	3.71483	0.0306165	FALSE	FALSE	FALSE	FALSE	FALSE	FALSE	TRUE	FALSE	FALSE	TRUE
5	DDX4	NP_077726.1	-4.1675	1	0	0	1	0	-1.54775	-0.956587	0.645954	0.0853079	FALSE	FALSE	FALSE	FALSE	FALSE	FALSE	FALSE	FALSE	FALSE	FALSE
13	ENOX1	NP_060463.2	-4.167	3	0	0	3	0	-3.89075	-1.08855	1.22207	0.00629997	FALSE	FALSE	FALSE	FALSE	FALSE	FALSE	FALSE	FALSE	FALSE	FALSE
5	ADAMTS19	NP_598377.4	-4.167	3	0	0	2	1	-3.62775	-1.44474	2.44196	0.0301553	FALSE	FALSE	FALSE	FALSE	FALSE	FALSE	FALSE	FALSE	FALSE	FALSE
11	PPP6R3	NP_001157632.1	-4.167	3	0	0	2	1	-3.28975	-1.1846	1.34583	0.0204678	FALSE	FALSE	FALSE	FALSE	FALSE	FALSE	FALSE	FALSE	FALSE	FALSE
20	SLC2A4RG	NP_064446.2	-4.1665	2	0	0	1	1	-1.974	-0.392187	0.875019	0.0144715	FALSE	FALSE	FALSE	FALSE	FALSE	FALSE	FALSE	FALSE	FALSE	FALSE
16	PRMT7	NP_061896.1	-4.1665	2	0	0	2	0	-2.716	-0.850269	1.48533	0.0223319	FALSE	FALSE	FALSE	FALSE	FALSE	FALSE	TRUE	FALSE	FALSE	TRUE
X	NLGN4X	NP_065793.1	-4.166	2	0	0	2	0	-2.805	-0.927891	0.683573	0.0138775	FALSE	FALSE	FALSE	FALSE	FALSE	FALSE	TRUE	FALSE	FALSE	TRUE
22	TEF	NP_003207.1	-4.166	1	0	0	1	0	-1.38125	-0.626527	0.737191	0.0900372	FALSE	FALSE	FALSE	FALSE	FALSE	FALSE	FALSE	FALSE	FALSE	FALSE
10	WAC	NP_057712.2	-4.166	2	0	0	2	0	-2.7285	-0.521797	0.57673	0.00529608	FALSE	FALSE	FALSE	FALSE	FALSE	FALSE	TRUE	TRUE	FALSE	TRUE
11	DGAT2	NP_115953.2	-4.166	1	0	0	1	0	-1.54625	-0.568217	0.597085	0.0560126	FALSE	FALSE	FALSE	FALSE	FALSE	FALSE	FALSE	FALSE	FALSE	FALSE
2	AAK1	NP_055726.4	-4.1645	1	0	0	1	0	-1.85925	-1.43127	1.38781	0.160008	FALSE	FALSE	FALSE	FALSE	FALSE	FALSE	FALSE	FALSE	FALSE	FALSE
1	TGFB2	NP_003229.1	-4.164	2	0	0	2	0	-2.5145	-0.918744	0.815795	0.0266936	FALSE	FALSE	FALSE	FALSE	FALSE	FALSE	TRUE	FALSE	FALSE	TRUE
7	SNX13	NP_055947.1	-4.164	2	0	0	1	1	-1.973	-1.18305	1.56931	0.131149	FALSE	FALSE	FALSE	FALSE	FALSE	FALSE	FALSE	FALSE	FALSE	FALSE
9	MVB12B	NP_001011703.1	-4.164	1	0	0	1	0	-1.54425	-0.484954	0.386515	0.0337493	FALSE	FALSE	FALSE	TRUE	FALSE	FALSE	FALSE	FALSE	FALSE	FALSE
1	PTPN22	NP_001295226.1	-4.164	1	0	0	1	0	-1.55825	-0.968185	1.13738	0.148589	FALSE	FALSE	FALSE	FALSE	FALSE	FALSE	FALSE	FALSE	FALSE	FALSE
3	KCNMB2	NP_001265840.1	-4.164	1	0	0	1	0	-1.54425	-0.325489	0.365315	0.0214204	FALSE	FALSE	FALSE	FALSE	FALSE	FALSE	FALSE	FALSE	FALSE	FALSE
X	UPRT	NP_659489.1	-4.1635	1	0	0	1	0	-1.54375	-0.332731	0.193602	0.015071	FALSE	FALSE	FALSE	FALSE	FALSE	FALSE	FALSE	FALSE	FALSE	FALSE
6	TMEM30A	NP_001137430.1	-4.163	1	0	0	1	0	-1.54325	-0.540306	0.614767	0.0530681	FALSE	FALSE	FALSE	FALSE	FALSE	FALSE	FALSE	FALSE	FALSE	FALSE
3	ESYT3	NP_001309760.1	-4.163	1	0	0	1	0	-1.56825	-0.856225	1.22585	0.122824	FALSE	FALSE	FALSE	FALSE	FALSE	FALSE	FALSE	FALSE	FALSE	FALSE
14	PARP2	NP_005475.2	-4.1615	3	0	0	2	1	-3.23075	-0.651244	0.821057	0.00341804	FALSE	FALSE	FALSE	FALSE	FALSE	FALSE	FALSE	FALSE	FALSE	FALSE
11	PCSK7	NP_004707.2	-4.1615	2	0	0	2	0	-2.7305	-1.38163	1.38283	0.0607335	FALSE	FALSE	FALSE	FALSE	FALSE	FALSE	FALSE	FALSE	FALSE	FALSE
3	TMCC1	NP_001017395.2	-4.1615	2	0	0	2	0	-2.3945	-1.13303	0.846421	0.0421127	FALSE	FALSE	FALSE	FALSE	FALSE	FALSE	FALSE	FALSE	FALSE	FALSE
16	CRAMP1	NP_065876.3	-4.161	4	0	0	1	3	-2.773	-1.81703	3.1306	0.15743	FALSE	FALSE	FALSE	FALSE	FALSE	FALSE	FALSE	FALSE	FALSE	FALSE
10	ZNF438	NP_001137238.1	-4.161	5	0	0	3	2	-3.888	-1.01374	1.32104	0.00490146	FALSE	FALSE	FALSE	FALSE	FALSE	FALSE	FALSE	FALSE	FALSE	FALSE
3	SCN11A	NP_054858.2	-4.1605	3	0	0	2	1	-3.15475	-2.34073	2.95683	0.183244	FALSE	FALSE	FALSE	FALSE	FALSE	FALSE	TRUE	FALSE	FALSE	TRUE
1	PRPF3	NP_004689.1	-4.16	5	0	0	4	1	-6.48275	-1.31439	0.95305	0.000117192	FALSE	FALSE	FALSE	FALSE	FALSE	FALSE	FALSE	FALSE	FALSE	FALSE
1	NVL	NP_002524.2	-4.16	1	0	0	1	0	-1.54025	-1.08631	1.07625	0.161953	FALSE	FALSE	FALSE	FALSE	FALSE	FALSE	FALSE	FALSE	FALSE	FALSE
7	NRF1	NP_001280092.1	-4.16	2	0	0	2	0	-3.061	-1.59521	0.917391	0.0228349	FALSE	FALSE	FALSE	FALSE	FALSE	FALSE	FALSE	FALSE	FALSE	FALSE
2	CREB1	NP_604391.1	-4.16	1	0	0	1	0	-1.54025	-0.752127	0.467254	0.0529607	FALSE	FALSE	FALSE	FALSE	FALSE	FALSE	FALSE	FALSE	FALSE	FALSE
12	COPS7A	NP_057403.1	-4.1595	1	0	0	1	0	-1.53975	-0.464241	0.495542	0.039894	FALSE	FALSE	FALSE	FALSE	FALSE	FALSE	FALSE	FALSE	FALSE	FALSE
19	PTPRH	NP_002833.4	-4.1585	1	0	0	1	0	-1.81625	-1.27133	2.23355	0.202381	FALSE	FALSE	FALSE	FALSE	FALSE	FALSE	FALSE	FALSE	FALSE	FALSE
11	CD59	NP_976075.1	-4.1585	1	0	0	1	0	-1.53875	-0.202053	0.213698	0.00920401	FALSE	FALSE	FALSE	FALSE	FALSE	FALSE	FALSE	FALSE	FALSE	FALSE
2	LY75-CD302	NP_001185688.1	-4.158	2	0	0	1	1	-6.79075	-2.58255	2.99566	0.00454768	FALSE	FALSE	FALSE	FALSE	FALSE	FALSE	FALSE	FALSE	FALSE	FALSE
11	MEN1	NP_001357188.2	-4.158	1	0	0	1	0	-1.53825	-1.6306	1.54275	0.290291	FALSE	FALSE	FALSE	FALSE	FALSE	FALSE	FALSE	FALSE	FALSE	FALSE
1	SYT11	NP_689493.3	-4.158	1	0	0	1	0	-1.53825	-0.5958	0.645343	0.0619578	FALSE	FALSE	FALSE	FALSE	FALSE	FALSE	FALSE	FALSE	FALSE	FALSE
X	ARHGAP4	NP_001158213.1	-4.157	4	0	0	3	1	-4.199	-0.830383	0.922386	0.00120064	FALSE	FALSE	FALSE	FALSE	FALSE	FALSE	FALSE	FALSE	FALSE	FALSE
21	HSF2BP	NP_008962.1	-4.157	3	0	0	2	1	-2.89375	-0.539736	0.602845	0.00388576	FALSE	FALSE	FALSE	FALSE	FALSE	FALSE	FALSE	FALSE	FALSE	FALSE
16	RPL13	NP_000968.2	-4.156	1	0	0	1	0	-1.53625	-0.211719	0.732946	0.00858382	FALSE	FALSE	FALSE	FALSE	FALSE	FALSE	TRUE	FALSE	FALSE	TRUE
7	LAMB1	NP_002282.2	-4.156	6	0	0	2	4	-5.7085	-2.41356	3.3481	0.0149861	FALSE	FALSE	FALSE	FALSE	FALSE	FALSE	TRUE	FALSE	FALSE	TRUE
11	FNBP4	NP_056123.2	-4.1555	2	0	0	2	0	-2.431	-1.06519	1.15916	0.0519832	FALSE	FALSE	FALSE	FALSE	FALSE	FALSE	FALSE	FALSE	FALSE	FALSE
3	USP4	NP_003354.2	-4.1545	3	0	0	1	2	-2.30375	-1.28492	1.51794	0.101299	FALSE	FALSE	FALSE	FALSE	FALSE	FALSE	FALSE	FALSE	FALSE	FALSE
15	RASGRF1	NP_002882.3	-4.154	3	0	0	3	0	-3.50825	-2.83364	2.77055	0.159865	FALSE	FALSE	FALSE	FALSE	FALSE	FALSE	FALSE	FALSE	FALSE	FALSE
17	SDK2	NP_001138424.1	-4.1535	6	0	0	3	3	-4.9885	-3.87408	5.41425	0.1938	FALSE	FALSE	FALSE	FALSE	FALSE	FALSE	FALSE	FALSE	FALSE	FALSE
12	SLC2A3	NP_008862.1	-4.153	2	0	0	1	1	-2.0565	-0.719788	0.855562	0.0393632	FALSE	FALSE	FALSE	FALSE	FALSE	FALSE	FALSE	FALSE	FALSE	FALSE
20	ATRN	NP_647537.1	-4.153	5	0	0	5	0	-5.30725	-2.49004	2.41825	0.0179584	FALSE	FALSE	FALSE	FALSE	FALSE	FALSE	FALSE	FALSE	FALSE	FALSE
17	SRP68	NP_055045.2	-4.1525	1	0	0	1	0	-1.53275	-1.07914	1.08349	0.160895	FALSE	FALSE	FALSE	FALSE	FALSE	FALSE	FALSE	FALSE	FALSE	FALSE
6	DCBLD1	NP_775945.1	-4.152	3	0	0	2	1					FALSE	FALSE	FALSE	FALSE	FALSE	FALSE	FALSE	FALSE	FALSE	FALSE
19	UNC13A	NP_001073890.2	-4.152	7	0	0	7	0	-8.74725	-4.11968	3.19304	0.00239119	FALSE	FALSE	FALSE	FALSE	FALSE	FALSE	FALSE	FALSE	FALSE	TRUE
4	NELFA	NP_005654.4	-4.151	3	0	0	2	1	-3.58875	-1.02543	1.50553	0.00795079	FALSE	FALSE	FALSE	FALSE	FALSE	FALSE	FALSE	FALSE	FALSE	FALSE
4	TNIP3	NP_001231693.1	-4.151	1	0	0	1	0	-1.53125	-0.532824	0.649803	0.0547138	FALSE	FALSE	FALSE	FALSE	FALSE	FALSE	FALSE	FALSE	FALSE	FALSE
11	DEAF1	NP_066288.2	-4.15	18	0	0	15	3	-20.7435	-1.05837	1.27658	0	TRUE	FALSE	TRUE	FALSE	FALSE	FALSE	TRUE	TRUE	TRUE	TRUE
20	MYBL2	NP_002457.1	-4.15	1	0	0	1	0	-1.53025	-1.18895	1.19189	0.182336	FALSE	FALSE	FALSE	FALSE	FALSE	FALSE	FALSE	FALSE	FALSE	FALSE
8	HMBOX1	NP_001311323.1	-4.15	1	0	0	1	0	-1.60425	-0.776362	0.649046	0.0715315	FALSE	FALSE	FALSE	FALSE	FALSE	FALSE	FALSE	FALSE	FALSE	FALSE
5	FASTKD3	NP_076996.2	-4.1495	1	0	0	1	0	-1.52975	-0.774004	0.863929	0.101656	FALSE	FALSE	FALSE	FALSE	FALSE	FALSE	FALSE	FALSE	FALSE	FALSE
14	HSP90AA1	NP_001017963.2	-4.1495	5	0	0	3	2	-3.961	-0.87574	1.15262	0.00372222	FALSE	FALSE	FALSE	FALSE	FALSE	TRUE	FALSE	FALSE	FALSE	FALSE
18	ZNF396	NP_001309215.1	-4.149	2	0	0	2	0	-2.3735	-0.401979	0.472629	0.00532388	FALSE	FALSE	FALSE	FALSE	FALSE	FALSE	FALSE	FALSE	FALSE	FALSE
7	CDK5	NP_004926.1	-4.149	1	0	0	1	0	-1.72125	-0.937766	0.633555	0.0670525	FALSE	FALSE	FALSE	FALSE	FALSE	FALSE	FALSE	FALSE	FALSE	FALSE
12	SLC35E3	NP_061126.2	-4.149	2	0	0	1	1	-1.8915	-0.3551	0.542632	0.0127335	FALSE	FALSE	FALSE	FALSE	FALSE	FALSE	FALSE	FALSE	FALSE	FALSE
22	JOSD1	NP_055691.1	-4.148	1	0	0	1	0	-1.52825	-0.321629	0.337695	0.0206179	FALSE	FALSE	FALSE	FALSE	FALSE	FALSE	FALSE	FALSE	FALSE	FALSE
6	ABHD16A	NP_066983.1	-4.1475	7	0	0	4	3	-5.83575	-0.993973	1.0922	0.000125229	FALSE	FALSE	FALSE	FALSE	FALSE	FALSE	TRUE	FALSE	FALSE	TRUE
8	VCPIP1	NP_079330.2	-4.1475	2	0	0	2	0	-2.392	-2.34613	1.90053	0.204746	FALSE	FALSE	FALSE	FALSE	FALSE	FALSE	FALSE	FALSE	FALSE	FALSE
1	GLUL	NP_002056.2	-4.1475	1	0	0	1	0	-1.52775	-0.839418	0.771265	0.101075	FALSE	FALSE	FALSE	FALSE	FALSE	FALSE	TRUE	FALSE	FALSE	TRUE
3	QARS1	NP_005042.1	-4.147	3	0	0	1	2	-2.22975	-0.812113	1.08515	0.041145	FALSE	FALSE	FALSE	FALSE	FALSE	FALSE	TRUE	FALSE	FALSE	TRUE
17	MYH8	NP_002463.2	-4.147	3	0	0	2	1	-3.66525	-2.93789	3.37589	0.192157	FALSE	FALSE	FALSE	FALSE	FALSE	FALSE	TRUE	FALSE	FALSE	TRUE
2	ACSL3	NP_004448.2	-4.1465	2	0	0	1	1	-2.247	-1.0553	1.02553	0.0551172	FALSE	FALSE	FALSE	FALSE	FALSE	FALSE	FALSE	FALSE	FALSE	FALSE
18	SETBP1	NP_056374.2	-4.146	12	0	0	11	1	-10.7635	-1.58903	2.16821	8.69013e-08	TRUE	FALSE	TRUE	FALSE	FALSE	FALSE	TRUE	TRUE	TRUE	TRUE
14	HEATR5A	NP_056288.2	-4.146	6	0	0	4	2	-5.1555	-2.25372	3.23923	0.0215578	FALSE	FALSE	FALSE	FALSE	FALSE	FALSE	FALSE	FALSE	FALSE	FALSE
8	SLC25A37	NP_057696.2	-4.146	1	0	0	1	0	-1.52625	-0.582275	0.920732	0.0686034	FALSE	FALSE	FALSE	FALSE	FALSE	FALSE	FALSE	FALSE	FALSE	FALSE
15	IQGAP1	NP_003861.1	-4.146	5	0	0	4	1	-5.053	-1.93296	2.19168	0.0106473	FALSE	FALSE	FALSE	FALSE	FALSE	FALSE	FALSE	FALSE	FALSE	FALSE
8	SLC52A2	NP_078807.1	-4.1455	1	0	0	1	0	-1.52575	-0.425218	0.920161	0.0429111	FALSE	FALSE	FALSE	FALSE	FALSE	FALSE	TRUE	FALSE	FALSE	TRUE
18	DTNA	NP_116760.2	-4.145	1	0	0	1	0	-1.52525	-0.568741	0.649556	0.0570745	FALSE	FALSE	FALSE	FALSE	FALSE	FALSE	FALSE	FALSE	FALSE	FALSE
11	SLC17A6	NP_065079.1	-4.144	1	0	0	1	0	-1.52425	-0.939698	0.795704	0.102237	FALSE	FALSE	FALSE	FALSE	FALSE	FALSE	FALSE	FALSE	FALSE	FALSE
9	MLLT3	NP_004520.2	-4.144	3	0	0	1	2	-1.54425	-0.994126	0.913334	0.119516	FALSE	FALSE	FALSE	FALSE	FALSE	FALSE	FALSE	FALSE	FALSE	FALSE
16	RPS2	NP_002943.2	-4.1435	2	0	0	2	0	-2.9695	-0.343583	0.536602	0.00136487	FALSE	FALSE	FALSE	FALSE	FALSE	FALSE	FALSE	FALSE	FALSE	FALSE
3	MLF1	NP_001356712.1	-4.1435	1	0	0	1	0	-1.20825	-0.376541	0.454612	0.0537826	FALSE	FALSE	FALSE	FALSE	FALSE	FALSE	FALSE	FALSE	FALSE	FALSE
19	PIP5K1C	NP_036530.1	-4.1425	8	0	0	8	0	-8.757	-1.06857	1.23948	5.9037e-07	TRUE	FALSE	TRUE	FALSE	FALSE	FALSE	TRUE	FALSE	FALSE	TRUE
12	PPFIA2	NP_003616.2	-4.142	6	0	0	6	0	-7.595	-2.3857	2.09692	0.000674528	FALSE	FALSE	FALSE	FALSE	FALSE	FALSE	FALSE	FALSE	FALSE	FALSE
14	CPNE6	NP_001267487.1	-4.142	2	0	0	2	0	-2.7625	-1.07074	1.22631	0.0332949	FALSE	FALSE	FALSE	FALSE	FALSE	FALSE	FALSE	FALSE	FALSE	FALSE
11	C11orf65	NP_689800.3	-4.141	2	0	0	1	1	-1.8685	-0.328036	0.379713	0.011187	FALSE	FALSE	FALSE	FALSE	FALSE	FALSE	FALSE	FALSE	FALSE	FALSE
14	NYNRIN	NP_079357.2	-4.141	5	0	0	3	2	-4.09825	-2.49505	3.5023	0.0998338	FALSE	FALSE	FALSE	FALSE	FALSE	FALSE	FALSE	FALSE	FALSE	FALSE
4	TEC	NP_003206.2	-4.14	2	0	0	1	1	-2.2545	-0.714285	0.743241	0.0244196	FALSE	FALSE	FALSE	FALSE	FALSE	FALSE	FALSE	FALSE	FALSE	FALSE
11	PHF21A	NP_001095272.1	-4.1395	2	0	0	1	1	-2.1955	-1.22179	1.1551	0.0826862	FALSE	FALSE	FALSE	FALSE	FALSE	FALSE	TRUE	TRUE	FALSE	TRUE
16	CBLN1	NP_004343.1	-4.1395	1	0	0	1	0	-1.51975	-0.386834	0.350593	0.0264504	FALSE	FALSE	FALSE	FALSE	FALSE	FALSE	FALSE	FALSE	FALSE	FALSE
X	STEEP1	NP_071384.1	-4.1395	2	0	0	2	0	-2.9335	-0.428238	0.253019	0.00160497	FALSE	FALSE	FALSE	FALSE	FALSE	FALSE	FALSE	FALSE	FALSE	TRUE
2	SLC5A6	NP_066918.2	-4.139	2	0	0	2	0	-3.08675	-0.954394	1.25746	0.016346	FALSE	FALSE	FALSE	FALSE	FALSE	FALSE	TRUE	FALSE	FALSE	TRUE
1	TP53BP2	NP_001026855.2	-4.139	3	0	0	2	1	-3.26125	-1.83582	2.03062	0.0763307	FALSE	FALSE	FALSE	FALSE	FALSE	FALSE	FALSE	FALSE	FALSE	FALSE
17	MED24	NP_001254726.1	-4.139	3	0	0	3	0	-3.30075	-1.75214	2.08736	0.0700102	FALSE	FALSE	FALSE	FALSE	FALSE	FALSE	FALSE	FALSE	FALSE	FALSE
20	DHX35	NP_068750.2	-4.139	2	0	0	1	1	-1.8615	-0.818274	1.19111	0.0754145	FALSE	FALSE	FALSE	FALSE	FALSE	FALSE	FALSE	FALSE	FALSE	FALSE
2	KIDINS220	NP_065789.1	-4.1385	8	0	0	6	2	-7.637	-2.28558	2.32767	0.000615465	FALSE	FALSE	FALSE	FALSE	FALSE	FALSE	TRUE	TRUE	FALSE	TRUE
16	PDXDC1	NP_055842.2	-4.138	4	0	0	2	2	-3.6195	-1.12644	1.35425	0.011367	FALSE	FALSE	FALSE	TRUE	FALSE	FALSE	FALSE	FALSE	FALSE	FALSE
8	HOOK3	NP_115786.1	-4.138	2	0	0	2	0	-2.5335	-1.19898	1.08142	0.0465661	FALSE	FALSE	FALSE	FALSE	FALSE	FALSE	FALSE	FALSE	FALSE	FALSE
17	ACLY	NP_001087.2	-4.1375	3	0	0	2	1	-3.11625	-2.31641	2.30068	0.139132	FALSE	FALSE	FALSE	FALSE	FALSE	FALSE	FALSE	FALSE	FALSE	FALSE
1	SLC25A33	NP_115691.1	-4.137	1	0	0	1	0	-1.49125	-0.567971	0.538494	0.056258	FALSE	FALSE	FALSE	FALSE	FALSE	FALSE	FALSE	FALSE	FALSE	FALSE
1	RGL1	NP_055964.3	-4.137	2	0	0	2	0	-2.904	-1.24938	1.2756	0.0374442	FALSE	FALSE	FALSE	FALSE	FALSE	FALSE	FALSE	FALSE	FALSE	FALSE
7	SLC26A4	NP_000432.1	-4.1365	1	0	0	1	0	-1.51675	-0.475781	0.8117	0.0486979	FALSE	FALSE	FALSE	FALSE	FALSE	FALSE	FALSE	FALSE	FALSE	FALSE
6	AGPAT1	NP_116130.2	-4.1365	1	0	0	1	0	-1.42125	-0.888723	0.581674	0.0846517	FALSE	FALSE	FALSE	FALSE	FALSE	FALSE	FALSE	FALSE	FALSE	FALSE
3	PLXNB1	NP_002664.2	-4.1365	6	0	0	4	2	-5.749	-2.27798	2.82303	0.0097182	FALSE	FALSE	FALSE	FALSE	FALSE	FALSE	FALSE	FALSE	FALSE	FALSE
5	SLC36A1	NP_510968.2	-4.1365	1	0	0	1	0	-1.51675	-0.490329	0.81164	0.0518742	FALSE	FALSE	FALSE	FALSE	FALSE	FALSE	FALSE	FALSE	FALSE	FALSE
9	GARNL3	NP_115669.3	-4.136	4	0	0	4	0	-4.9325	-1.71405	1.60324	0.005967	FALSE	FALSE	FALSE	FALSE	FALSE	FALSE	FALSE	FALSE	FALSE	FALSE
7	ZNF746	NP_001156946.1	-4.136	2	0	0	1	1	-1.554	-1.33262	1.73582	0.268772	FALSE	FALSE	FALSE	FALSE	FALSE	FALSE	FALSE	FALSE	FALSE	FALSE
20	TRPC4AP	NP_056453.1	-4.1355	4	0	0	3	1	-4.149	-1.19212	1.44667	0.00601086	FALSE	FALSE	FALSE	FALSE	FALSE	FALSE	FALSE	FALSE	FALSE	FALSE
12	KSR2	NP_775869.4	-4.1355	3	0	0	1	2	-2.69375	-2.02855	2.31684	0.163085	FALSE	FALSE	FALSE	FALSE	FALSE	FALSE	FALSE	FALSE	FALSE	FALSE
1	ZBTB41	NP_919290.2	-4.135	2	0	0	2	0	-2.737	-1.57904	1.39723	0.071074	FALSE	FALSE	FALSE	FALSE	FALSE	FALSE	FALSE	FALSE	FALSE	FALSE
6	KLC4	NP_958931.1	-4.135	1	0	0	1	0	-1.51525	-0.888876	1.11692	0.14113	FALSE	FALSE	FALSE	FALSE	FALSE	FALSE	FALSE	FALSE	FALSE	FALSE
5	CSNK1G3	NP_001038188.1	-4.135	2	0	0	1	1	-2.2005	-0.634492	0.485443	0.017779	FALSE	FALSE	FALSE	FALSE	FALSE	FALSE	FALSE	FALSE	FALSE	FALSE
9	TSC1	NP_000359.1	-4.135	4	0	0	3	1	-4.401	-1.82212	2.13624	0.0201867	FALSE	FALSE	FALSE	FALSE	FALSE	FALSE	TRUE	FALSE	FALSE	TRUE
11	TRPC6	NP_004612.2	-4.1345	1	0	0	1	0	-1.51475	-0.970127	1.16074	0.157232	FALSE	FALSE	FALSE	FALSE	FALSE	FALSE	FALSE	FALSE	FALSE	FALSE
1	EIF2D	NP_008824.2	-4.1345	3	0	0	2	1	-3.46075	-0.853621	0.976008	0.0059011	FALSE	FALSE	FALSE	FALSE	FALSE	FALSE	FALSE	FALSE	FALSE	FALSE
X	GRIPAP1	NP_064522.4	-4.1325	1	0	0	1	0	-1.63925	-1.23256	0.991424	0.139045	FALSE	FALSE	FALSE	FALSE	FALSE	FALSE	FALSE	FALSE	FALSE	FALSE
15	OCA2	NP_000266.2	-4.1325	2	0	0	2	0	-2.3875	-0.870905	1.5118	0.0382702	FALSE	FALSE	FALSE	FALSE	FALSE	FALSE	FALSE	FALSE	FALSE	FALSE
22	FAM118A	NP_001098065.1	-4.132	2	0	0	1	1	-1.903	-0.453359	0.719314	0.0176649	FALSE	FALSE	FALSE	FALSE	FALSE	FALSE	FALSE	FALSE	FALSE	FALSE
17	SUPT6H	NP_001307684.1	-4.132	9	0	0	9	0	-11.5448	-3.90302	3.3265	9.49016e-05	FALSE	FALSE	FALSE	FALSE	FALSE	FALSE	FALSE	FALSE	FALSE	FALSE
4	DCK	NP_000779.1	-4.132	1	0	0	1	0	-1.51225	-0.299673	0.292909	0.0187836	FALSE	FALSE	FALSE	FALSE	FALSE	FALSE	FALSE	FALSE	FALSE	FALSE
19	RFX1	NP_002909.4	-4.1315	1	0	0	1	0	-1.51175	-1.74607	1.9222	0.356187	FALSE	FALSE	FALSE	FALSE	FALSE	FALSE	FALSE	FALSE	FALSE	FALSE
3	CLASP2	NP_055912.2	-4.1315	4	0	0	2	2	-4.037	-2.82253	2.6016	0.0842007	FALSE	FALSE	FALSE	FALSE	FALSE	FALSE	FALSE	FALSE	FALSE	FALSE
3	EDEM1	NP_055489.1	-4.1305	2	0	0	1	1	-2.0145	-0.513547	0.853036	0.0229966	FALSE	FALSE	FALSE	FALSE	FALSE	FALSE	FALSE	FALSE	FALSE	FALSE
X	ATG4A	NP_443168.2	-4.13	1	0	0	1	0	-1.51025	-0.449256	0.310401	0.0286626	FALSE	FALSE	FALSE	FALSE	FALSE	FALSE	FALSE	FALSE	FALSE	FALSE
2	KANSL3	NP_001108488.1	-4.1295	1	0	0	1	0	-1.50975	-1.35747	1.5595	0.264582	FALSE	FALSE	FALSE	FALSE	FALSE	FALSE	FALSE	FALSE	FALSE	FALSE
15	RAD51	NP_002866.2	-4.1295	2	0	0	2	0	-2.792	-0.798473	0.533159	0.0082732	FALSE	FALSE	FALSE	FALSE	FALSE	FALSE	TRUE	FALSE	FALSE	TRUE
8	ADCY8	NP_001106.1	-4.129	4	0	0	4	0	-4.9915	-1.78536	2.07264	0.00855798	FALSE	FALSE	FALSE	FALSE	FALSE	FALSE	FALSE	FALSE	FALSE	FALSE
7	OR2A25	NP_001004488.1	-4.1275	2	0	0	2	0	-2.5455	-0.251178	0.472745	0.00107176	FALSE	FALSE	FALSE	FALSE	FALSE	FALSE	FALSE	FALSE	FALSE	FALSE
4	HHIP	NP_071920.1	-4.127	2	0	0	1	1	-1.94	-0.76039	0.908677	0.0537061	FALSE	FALSE	FALSE	FALSE	FALSE	FALSE	FALSE	FALSE	FALSE	FALSE
12	TNFRSF1A	NP_001056.1	-4.1265	1	0	0	1	0	-1.50675	-1.15674	1.08936	0.168596	FALSE	FALSE	FALSE	FALSE	FALSE	FALSE	FALSE	FALSE	FALSE	FALSE
17	MAPK7	NP_620602.2	-4.126	1	0	0	1	0	-1.50625	-0.925731	1.09592	0.14396	FALSE	FALSE	FALSE	FALSE	FALSE	FALSE	FALSE	FALSE	FALSE	FALSE
20	MCM8	NP_115874.3	-4.126	2	0	0	2	0	-2.4475	-0.928644	1.08949	0.0383143	FALSE	FALSE	FALSE	FALSE	FALSE	FALSE	FALSE	FALSE	FALSE	FALSE
22	GTPBP1	NP_004277.2	-4.1255	2	0	0	1	1	-2.165	-1.32125	1.2073	0.0960645	FALSE	FALSE	FALSE	FALSE	FALSE	FALSE	FALSE	FALSE	FALSE	FALSE
X	GPR50	NP_004215.2	-4.1255	1	0	0	1	0	-1.50575	-0.425743	0.44446	0.0357656	FALSE	FALSE	FALSE	FALSE	FALSE	FALSE	FALSE	FALSE	FALSE	FALSE
14	ACIN1	NP_055792.1	-4.1255	3	0	0	1	2	-3.497	-2.52812	2.89298	0.14605	FALSE	FALSE	FALSE	FALSE	FALSE	FALSE	FALSE	FALSE	FALSE	FALSE
1	IPP	NP_005888.1	-4.125	2	0	0	1	1	-2.073	-0.734757	0.915541	0.0401697	FALSE	FALSE	FALSE	FALSE	FALSE	FALSE	FALSE	FALSE	FALSE	FALSE
8	SLC18A1	NP_003044.1	-4.1245	4	0	0	1	3	-2.28975	-0.263153	0.741644	0.00201435	FALSE	FALSE	FALSE	FALSE	FALSE	TRUE	FALSE	FALSE	FALSE	FALSE
6	C2	NP_000054.2	-4.1245	1	0	0	1	0	-1.50475	-0.938483	1.14277	0.155945	FALSE	FALSE	FALSE	FALSE	FALSE	FALSE	FALSE	FALSE	FALSE	FALSE
1	FOXJ3	NP_001185779.1	-4.124	1	0	0	1	0	-1.50425	-0.917014	0.991623	0.137672	FALSE	FALSE	FALSE	FALSE	FALSE	FALSE	FALSE	FALSE	FALSE	FALSE
1	VAV3	NP_006104.4	-4.124	4	0	0	2	2	-3.4895	-1.03877	1.32334	0.0107778	FALSE	FALSE	FALSE	FALSE	FALSE	FALSE	FALSE	FALSE	FALSE	FALSE
12	TMTC2	NP_689801.1	-4.1235	2	0	0	2	0	-2.5135	-1.17241	1.41461	0.0631777	FALSE	FALSE	FALSE	FALSE	FALSE	FALSE	FALSE	FALSE	FALSE	FALSE
5	NUDCD2	NP_660309.1	-4.123	2	0	0	2	0	-2.751	-0.157771	0.268321	0.000131009	FALSE	FALSE	FALSE	FALSE	FALSE	FALSE	FALSE	FALSE	FALSE	FALSE
8	ASH2L	NP_004665.2	-4.1225	1	0	0	1	0	-1.50275	-1.18691	0.957598	0.160953	FALSE	FALSE	FALSE	FALSE	FALSE	FALSE	FALSE	FALSE	FALSE	FALSE
3	DYNLT2B	NP_689986.2	-4.122	1	0	0	1	0	-1.50225	-0.205364	0.196509	0.0102337	FALSE	FALSE	FALSE	FALSE	FALSE	FALSE	FALSE	FALSE	FALSE	FALSE
11	KCNK4	NP_001304019.1	-4.121	5	0	0	5	0	-6.10725	-0.532245	0.682834	1.68779e-06	TRUE	FALSE	TRUE	FALSE	FALSE	FALSE	TRUE	FALSE	FALSE	TRUE
2	OTX1	NP_055377.1	-4.121	1	0	0	1	0	-1.50125	-0.76755	0.85361	0.103749	FALSE	FALSE	FALSE	FALSE	FALSE	FALSE	FALSE	FALSE	FALSE	FALSE
1	PTPRC	NP_002829.3	-4.121	4	0	0	4	0	-4.743	-1.16731	1.06602	0.0016804	FALSE	FALSE	FALSE	FALSE	FALSE	FALSE	FALSE	FALSE	FALSE	FALSE
19	CSNK1G2	NP_001310.3	-4.1205	1	0	0	1	0	-1.22525	-0.975633	1.01773	0.194763	FALSE	FALSE	FALSE	FALSE	FALSE	FALSE	FALSE	FALSE	FALSE	FALSE
8	CHRNB3	NP_000740.1	-4.12	1	0	0	1	0	-1.50025	-0.643339	0.776393	0.0810651	FALSE	FALSE	FALSE	FALSE	FALSE	FALSE	FALSE	FALSE	FALSE	FALSE
15	BAHD1	NP_055767.3	-4.119	5	0	0	3	2	-4.37375	-1.33084	1.76551	0.00612895	FALSE	FALSE	FALSE	FALSE	FALSE	FALSE	FALSE	FALSE	FALSE	FALSE
X	SRPK3	NP_055185.2	-4.1185	5	0	0	2	3	-3.63175	-0.621599	0.742239	0.00140714	FALSE	FALSE	FALSE	FALSE	FALSE	FALSE	FALSE	FALSE	FALSE	FALSE
16	SLC9A5	NP_004585.1	-4.1185	1	0	0	1	0	-1.49875	-1.2753	1.41156	0.227462	FALSE	FALSE	FALSE	FALSE	FALSE	FALSE	FALSE	FALSE	FALSE	FALSE
20	BTBD3	NP_055777.1	-4.118	1	0	0	1	0	-1.14625	-1.04259	0.981688	0.215711	FALSE	FALSE	FALSE	FALSE	FALSE	FALSE	FALSE	FALSE	FALSE	FALSE
15	UBL7	NP_001273670.1	-4.1175	1	0	0	1	0	-1.49775	-0.616542	0.677795	0.0718004	FALSE	FALSE	FALSE	FALSE	FALSE	FALSE	FALSE	FALSE	FALSE	FALSE
14	AHSA1	NP_036243.1	-4.1175	1	0	0	1	0	-1.49775	-0.566874	0.588955	0.0588719	FALSE	FALSE	FALSE	FALSE	FALSE	FALSE	FALSE	FALSE	FALSE	FALSE
17	CDK12	NP_057591.2	-4.117	1	0	0	1	0	-2.77475	-1.75253	1.64823	0.0840244	FALSE	FALSE	FALSE	FALSE	FALSE	FALSE	FALSE	FALSE	FALSE	FALSE
14	VIPAS39	NP_001180244.1	-4.117	1	0	0	1	0	-1.49725	-0.721728	0.772562	0.0947997	FALSE	FALSE	FALSE	FALSE	FALSE	FALSE	TRUE	FALSE	FALSE	TRUE
9	LPAR1	NP_001392.2	-4.117	2	0	0	2	0	-2.2655	-0.698433	0.641843	0.022179	FALSE	FALSE	FALSE	FALSE	FALSE	FALSE	FALSE	FALSE	FALSE	FALSE
12	TRPV4	NP_067638.3	-4.1165	3	0	0	2	1	-3.11475	-1.49284	1.79282	0.0539377	FALSE	FALSE	FALSE	FALSE	FALSE	FALSE	TRUE	FALSE	FALSE	TRUE
11	SLC6A5	NP_004202.4	-4.116	2	0	0	2	0	-3.0585	-0.962648	1.6893	0.0193372	FALSE	FALSE	FALSE	FALSE	FALSE	FALSE	TRUE	FALSE	FALSE	TRUE
2	BAZ2B	NP_038478.2	-4.116	4	0	0	4	0	-4.275	-2.14874	2.38203	0.0384939	FALSE	FALSE	FALSE	FALSE	FALSE	FALSE	FALSE	FALSE	FALSE	TRUE
15	TRPM7	NP_060142.3	-4.1155	5	0	0	4	1	-4.82725	-2.0443	2.13823	0.0158667	FALSE	FALSE	FALSE	FALSE	FALSE	FALSE	FALSE	FALSE	FALSE	FALSE
2	CRIM1	NP_057525.1	-4.1155	5	0	0	3	2	-5.25125	-1.20341	1.82287	0.000953979	FALSE	FALSE	FALSE	FALSE	FALSE	FALSE	TRUE	FALSE	FALSE	TRUE
12	FKBP4	NP_002005.1	-4.115	2	0	0	1	1	-1.5275	-0.619209	0.775117	0.0717455	FALSE	FALSE	FALSE	FALSE	FALSE	FALSE	FALSE	FALSE	FALSE	FALSE
1	LAMC1	NP_002284.3	-4.1145	3	0	0	1	2	-2.40975	-1.67102	1.97624	0.158558	FALSE	FALSE	FALSE	FALSE	FALSE	FALSE	FALSE	FALSE	FALSE	FALSE
2	PTPRN	NP_002837.1	-4.1145	6	0	0	5	1	-6.0165	-1.60444	2.02556	0.000993478	FALSE	FALSE	FALSE	FALSE	FALSE	FALSE	FALSE	FALSE	FALSE	FALSE
8	ZFAT	NP_065914.2	-4.114	5	0	0	4	1	-4.80525	-1.96101	2.44615	0.016389	FALSE	FALSE	FALSE	FALSE	FALSE	FALSE	FALSE	FALSE	FALSE	FALSE
X	XPNPEP2	NP_003390.4	-4.1135	2	0	0	2	0	-2.246	-0.697043	0.671783	0.0240973	FALSE	FALSE	FALSE	FALSE	FALSE	FALSE	FALSE	FALSE	FALSE	FALSE
7	LRRD1	NP_001155000.1	-4.113	2	0	0	1	1	-1.7795	-0.672966	0.743579	0.0529641	FALSE	FALSE	FALSE	FALSE	FALSE	FALSE	FALSE	FALSE	FALSE	FALSE
2	PFN4	NP_955378.1	-4.1125	1	0	0	1	0	-1.42225	-0.202572	0.208667	0.012012	FALSE	FALSE	FALSE	FALSE	FALSE	FALSE	FALSE	FALSE	FALSE	FALSE
2	MYO1B	NP_001123630.1	-4.1125	2	0	0	1	1	-2.171	-1.47694	1.3663	0.125856	FALSE	FALSE	FALSE	FALSE	FALSE	FALSE	FALSE	FALSE	FALSE	FALSE
10	DCLRE1A	NP_001258745.1	-4.111	1	0	0	1	0	-3.686	-1.3669	1.59488	0.0185691	FALSE	FALSE	FALSE	FALSE	FALSE	FALSE	FALSE	FALSE	FALSE	FALSE
5	GLRA1	NP_000162.2	-4.111	3	0	0	3	0	-3.91425	-0.709653	0.752138	0.00123345	FALSE	FALSE	FALSE	FALSE	FALSE	FALSE	TRUE	FALSE	FALSE	TRUE
X	NEXMIF	NP_001008537.1	-4.1105	2	0	0	2	0	-2.615	-1.48604	1.27324	0.0688881	FALSE	FALSE	FALSE	FALSE	FALSE	FALSE	TRUE	TRUE	FALSE	TRUE
1	S100A4	NP_002952.1	-4.1095	1	0	0	1	0	-1.48975	-0.105664	0.150545	0.0035955	FALSE	FALSE	FALSE	FALSE	FALSE	FALSE	FALSE	FALSE	FALSE	FALSE
19	ICAM1	NP_000192.2	-4.1095	1	0	0	1	0	-1.48975	-0.750051	1.14328	0.117766	FALSE	FALSE	FALSE	FALSE	FALSE	FALSE	FALSE	FALSE	FALSE	FALSE
21	RRP1B	NP_055871.1	-4.1095	4	0	0	2	2	-2.8455	-1.13593	1.39089	0.0373487	FALSE	FALSE	FALSE	FALSE	FALSE	FALSE	FALSE	FALSE	FALSE	FALSE
1	ATP1A4	NP_653300.2	-4.1085	6	0	0	3	3	-4.5735	-1.17156	1.75272	0.00283442	FALSE	FALSE	FALSE	FALSE	FALSE	FALSE	FALSE	FALSE	FALSE	FALSE
6	RFX6	NP_775831.2	-4.108	3	0	0	2	1	-3.38725	-1.1443	1.15122	0.0143545	FALSE	FALSE	FALSE	FALSE	FALSE	FALSE	TRUE	FALSE	FALSE	TRUE
21	TTC3	NP_001001894.1	-4.108	3	0	0	3	0	-3.76825	-1.77907	2.06139	0.0404263	FALSE	FALSE	FALSE	FALSE	FALSE	FALSE	FALSE	FALSE	FALSE	FALSE
3	PLS1	NP_001138791.1	-4.108	2	0	0	1	1	-2.217	-0.942363	0.942195	0.0495247	FALSE	FALSE	FALSE	FALSE	FALSE	FALSE	FALSE	FALSE	FALSE	FALSE
18	ATP8B1	NP_005594.2	-4.1075	3	0	0	3	0	-3.76725	-1.79901	1.89906	0.0372696	FALSE	FALSE	FALSE	FALSE	FALSE	FALSE	TRUE	FALSE	FALSE	TRUE
2	LTBP1	NP_001159736.2	-4.107	7	0	0	2	5	-4.64775	-1.68156	2.41509	0.0106713	FALSE	FALSE	FALSE	FALSE	FALSE	FALSE	TRUE	FALSE	FALSE	TRUE
3	SLC35G2	NP_079522.2	-4.107	2	0	0	2	0	-2.0605	-0.551117	0.622075	0.0206619	FALSE	FALSE	FALSE	FALSE	FALSE	FALSE	FALSE	FALSE	FALSE	FALSE
3	QRICH1	NP_001307509.1	-4.106	2	0	0	2	0	-2.564	-1.43492	1.28515	0.0715886	FALSE	FALSE	FALSE	FALSE	FALSE	FALSE	TRUE	TRUE	FALSE	TRUE
12	KCNMB4	NP_055320.4	-4.106	1	0	0	1	0	-1.48625	-0.535311	0.459811	0.0479118	FALSE	FALSE	FALSE	FALSE	FALSE	FALSE	FALSE	FALSE	FALSE	FALSE
1	ARHGAP29	NP_004806.3	-4.106	3	0	0	3	0	-4.07225	-1.46913	1.5629	0.0126857	FALSE	FALSE	FALSE	FALSE	FALSE	FALSE	FALSE	FALSE	FALSE	TRUE
17	RUNDC3A	NP_001138297.1	-4.105	3	0	0	1	2	-2.35475	-0.990655	1.17793	0.0518053	FALSE	FALSE	FALSE	FALSE	FALSE	FALSE	FALSE	FALSE	FALSE	FALSE
2	RNPEPL1	NP_060696.4	-4.105	3	0	0	1	2	-2.35525	-0.882858	1.10115	0.0405513	FALSE	FALSE	FALSE	FALSE	FALSE	FALSE	FALSE	FALSE	FALSE	FALSE
7	MIOS	NP_061878.3	-4.1045	4	0	0	2	2	-3.219	-1.1325	1.33599	0.0203067	FALSE	FALSE	FALSE	FALSE	FALSE	FALSE	FALSE	FALSE	FALSE	FALSE
14	SEC23A	NP_006355.2	-4.104	3	0	0	3	0	-3.57425	-0.920233	1.25824	0.00717865	FALSE	FALSE	FALSE	FALSE	FALSE	FALSE	TRUE	FALSE	FALSE	TRUE
20	FERMT1	NP_060141.3	-4.1035	3	0	0	2	1	-3.14625	-1.00384	1.17645	0.0156581	FALSE	FALSE	FALSE	FALSE	FALSE	FALSE	FALSE	FALSE	FALSE	FALSE
12	TMTC1	NP_001180380.1	-4.1035	3	0	0	3	0	-3.29225	-1.00871	1.38005	0.0131752	FALSE	FALSE	FALSE	FALSE	FALSE	FALSE	FALSE	FALSE	FALSE	FALSE
5	GOLPH3	NP_071413.1	-4.1035	1	0	0	1	0	-1.48375	-0.466788	0.608279	0.0478652	FALSE	FALSE	FALSE	FALSE	FALSE	FALSE	FALSE	FALSE	FALSE	FALSE
12	MSRB3	NP_932346.1	-4.103	1	0	0	1	0	-1.48325	-0.2257	0.224372	0.0117944	FALSE	FALSE	FALSE	FALSE	FALSE	FALSE	FALSE	FALSE	FALSE	FALSE
12	IFT81	NP_054774.2	-4.103	5	0	0	4	1	-4.69225	-0.990647	1.04634	0.00100386	FALSE	FALSE	FALSE	FALSE	FALSE	FALSE	FALSE	FALSE	FALSE	FALSE
2	NRBP1	NP_001308287.1	-4.1025	3	0	0	2	1	-3.54825	-1.26747	0.833071	0.00822345	FALSE	FALSE	FALSE	FALSE	FALSE	FALSE	FALSE	FALSE	FALSE	FALSE
17	LASP1	NP_006139.1	-4.102	3	0	0	3	0	-3.97775	-0.592615	0.59192	0.000594282	FALSE	FALSE	FALSE	FALSE	FALSE	FALSE	FALSE	FALSE	FALSE	FALSE
1	DOCK7	NP_001258928.1	-4.102	5	0	0	4	1	-5.64925	-3.61475	3.55918	0.0569465	FALSE	FALSE	FALSE	FALSE	FALSE	FALSE	TRUE	FALSE	FALSE	TRUE
3	PLXNA1	NP_115618.3	-4.102	9	0	0	7	2	-8.67625	-3.1953	4.65033	0.00208605	FALSE	FALSE	FALSE	FALSE	FALSE	FALSE	TRUE	FALSE	FALSE	TRUE
22	RANGAP1	NP_002874.1	-4.102	1	0	0	1	0	-1.48225	-0.827701	0.755706	0.0985787	FALSE	FALSE	FALSE	FALSE	FALSE	FALSE	FALSE	FALSE	FALSE	FALSE
2	HTRA2	NP_037379.1	-4.101	1	0	0	1	0	-1.48125	-0.827558	0.806358	0.106374	FALSE	FALSE	FALSE	FALSE	FALSE	FALSE	TRUE	FALSE	FALSE	TRUE
16	RBBP6	NP_008841.2	-4.1005	3	0	0	2	1	-3.10525	-2.57509	2.87566	0.210401	FALSE	FALSE	FALSE	FALSE	FALSE	FALSE	FALSE	FALSE	FALSE	FALSE
14	NFATC4	NP_004545.2	-4.1005	4	0	0	3	1	-4.604	-1.38815	1.9253	0.00506983	FALSE	FALSE	FALSE	FALSE	FALSE	FALSE	FALSE	FALSE	FALSE	FALSE
4	MAN2B2	NP_056089.1	-4.1	2	0	0	1	1	-1.5615	-1.05522	2.39538	0.216385	FALSE	FALSE	FALSE	FALSE	FALSE	FALSE	FALSE	FALSE	FALSE	FALSE
17	GCGR	NP_000151.1	-4.0995	1	0	0	1	0	-1.47975	-0.652502	1.03044	0.0925261	FALSE	FALSE	FALSE	FALSE	FALSE	FALSE	FALSE	FALSE	FALSE	FALSE
7	MDFIC	NP_951038.1	-4.099	1	0	0	1	0	-1.47925	-0.241043	0.488624	0.0142072	FALSE	FALSE	FALSE	FALSE	FALSE	FALSE	FALSE	FALSE	FALSE	FALSE
4	DDX60L	NP_001365001.1	-4.099	4	0	0	2	2	-3.443	-2.08334	2.60624	0.100816	FALSE	FALSE	FALSE	FALSE	FALSE	FALSE	FALSE	FALSE	FALSE	FALSE
12	HPD	NP_001165464.1	-4.0985	3	0	0	2	1	-2.76975	-0.646858	0.717166	0.00848454	FALSE	FALSE	FALSE	FALSE	FALSE	FALSE	TRUE	FALSE	FALSE	TRUE
1	OR6K2	NP_001005279.1	-4.098	2	0	0	1	1	-1.8905	-0.245201	0.532158	0.00638586	FALSE	FALSE	FALSE	FALSE	FALSE	FALSE	FALSE	FALSE	FALSE	FALSE
8	RRM2B	NP_001165948.1	-4.098	1	0	0	1	0	-1.47825	-0.505489	0.516307	0.0466896	FALSE	FALSE	FALSE	FALSE	FALSE	FALSE	TRUE	FALSE	FALSE	TRUE
10	GFRA1	NP_005255.1	-4.097	3	0	0	3	0	-3.28675	-0.667833	0.833142	0.00316893	FALSE	FALSE	FALSE	FALSE	FALSE	FALSE	FALSE	FALSE	FALSE	FALSE
10	COMMD3-BMI1	NP_001190991.1	-4.0965	0	0	0	0	0					FALSE	FALSE	FALSE	FALSE	FALSE	FALSE	FALSE	FALSE	FALSE	FALSE
2	IL1B	NP_000567.1	-4.0965	1	0	0	1	0	-1.47675	-0.393775	0.393693	0.0316295	FALSE	FALSE	FALSE	FALSE	FALSE	FALSE	FALSE	FALSE	FALSE	FALSE
12	CPSF6	NP_001287876.1	-4.096	4	0	0	4	0	-4.083	-1.31703	1.207	0.00700187	FALSE	FALSE	FALSE	FALSE	FALSE	FALSE	FALSE	FALSE	FALSE	FALSE
15	BLM	NP_000048.1	-4.096	4	0	0	4	0	-4.1605	-1.56992	1.77696	0.0155665	FALSE	FALSE	FALSE	FALSE	FALSE	FALSE	TRUE	FALSE	FALSE	TRUE
1	NME7	NP_037462.1	-4.0955	3	0	0	3	0	-3.37125	-0.467591	0.608664	0.000669606	FALSE	FALSE	FALSE	FALSE	FALSE	FALSE	FALSE	FALSE	FALSE	FALSE
22	CSNK1E	NP_001885.1	-4.0955	5	0	0	3	2					FALSE	FALSE	FALSE	FALSE	FALSE	FALSE	FALSE	FALSE	FALSE	FALSE
15	TPM1	NP_001018005.1	-4.095	1	0	0	1	0	-1.47525	-0.853799	0.56782	0.0800265	FALSE	FALSE	FALSE	FALSE	FALSE	FALSE	FALSE	FALSE	FALSE	FALSE
14	STON2	NP_001243359.1	-4.095	4	0	0	1	3	-3.541	-1.00603	1.26981	0.00807987	FALSE	FALSE	FALSE	FALSE	FALSE	FALSE	FALSE	FALSE	FALSE	FALSE
2	MEMO1	NP_001131074.1	-4.0945	1	0	0	1	0	-0.85225	-0.4444	0.422791	0.111813	FALSE	FALSE	FALSE	FALSE	FALSE	FALSE	FALSE	FALSE	FALSE	FALSE
3	EIF5A2	NP_065123.1	-4.094	2	0	0	2	0	-3.3495	-0.331742	0.253819	0.000317142	FALSE	FALSE	FALSE	FALSE	FALSE	FALSE	FALSE	FALSE	FALSE	FALSE
16	CD19	NP_001761.3	-4.094	1	0	0	1	0	-1.47425	-0.875058	1.1352	0.151204	FALSE	FALSE	FALSE	FALSE	FALSE	FALSE	FALSE	FALSE	FALSE	FALSE
1	DNAJC6	NP_001243793.1	-4.094	1	0	0	1	0	-1.47425	-1.37713	1.66731	0.290761	FALSE	FALSE	FALSE	FALSE	FALSE	FALSE	FALSE	FALSE	FALSE	FALSE
12	INTS13	NP_060634.2	-4.0935	3	0	0	3	0	-2.2945	-1.29989	1.15728	0.0774569	FALSE	FALSE	FALSE	FALSE	FALSE	FALSE	FALSE	FALSE	FALSE	FALSE
12	GLS2	NP_037399.2	-4.093	1	0	0	1	0	-1.47325	-0.635473	0.542678	0.0649964	FALSE	FALSE	FALSE	FALSE	FALSE	FALSE	FALSE	FALSE	FALSE	FALSE
2	COL4A3	NP_000082.2	-4.093	5	0	0	3	2	-4.91725	-2.23243	2.61029	0.0233937	FALSE	FALSE	FALSE	FALSE	FALSE	FALSE	TRUE	FALSE	FALSE	TRUE
13	OLFM4	NP_006409.3	-4.093	2	0	0	2	0	-2.1515	-0.58776	0.87707	0.022021	FALSE	FALSE	FALSE	FALSE	FALSE	FALSE	FALSE	FALSE	FALSE	FALSE
19	RPS5	NP_001000.2	-4.093	2	0	0	2	0	-2.475	-0.66086	0.512698	0.0120859	FALSE	FALSE	FALSE	FALSE	FALSE	FALSE	FALSE	FALSE	FALSE	FALSE
19	DOT1L	NP_115871.1	-4.093	8	0	0	5	3	-6.731	-2.68079	3.23012	0.00751655	FALSE	FALSE	FALSE	FALSE	FALSE	FALSE	FALSE	FALSE	FALSE	FALSE
1	MFSD14A	NP_149044.2	-4.093	1	0	0	1	0	-1.60125	-0.872234	0.720268	0.0896007	FALSE	FALSE	FALSE	FALSE	FALSE	FALSE	FALSE	FALSE	FALSE	FALSE
16	IRF8	NP_002154.1	-4.093	2	0	0	1	1	-1.5665	-0.807635	1.04624	0.110887	FALSE	FALSE	FALSE	FALSE	FALSE	FALSE	FALSE	FALSE	FALSE	FALSE
20	GMEB2	NP_036516.1	-4.093	3	0	0	2	1	-2.76725	-1.02921	1.2902	0.0319779	FALSE	FALSE	FALSE	FALSE	FALSE	FALSE	FALSE	FALSE	FALSE	FALSE
19	BCKDHA	NP_000700.1	-4.0925	1	0	0	1	0	-1.47275	-0.747113	0.872378	0.107433	FALSE	FALSE	FALSE	FALSE	FALSE	FALSE	TRUE	FALSE	FALSE	TRUE
14	TM9SF1	NP_006396.2	-4.092	2	0	0	1	1	-2.1	-0.927402	1.23373	0.067112	FALSE	FALSE	FALSE	FALSE	FALSE	FALSE	FALSE	FALSE	FALSE	FALSE
1	UBE4B	NP_001099032.1	-4.091	3	0	0	2	1	-4.07975	-2.15487	2.01838	0.039131	FALSE	FALSE	FALSE	FALSE	FALSE	FALSE	FALSE	FALSE	FALSE	FALSE
1	PRKCZ	NP_002735.3	-4.091	1	0	0	1	0	-1.47125	-1.09312	0.854595	0.129419	FALSE	FALSE	FALSE	FALSE	FALSE	FALSE	FALSE	FALSE	FALSE	FALSE
12	XPOT	NP_009166.2	-4.091	1	0	0	1	0	-1.43325	-1.35011	1.48403	0.260914	FALSE	FALSE	FALSE	FALSE	FALSE	FALSE	FALSE	FALSE	FALSE	FALSE
10	CCNY	NP_659449.3	-4.0905	1	0	0	1	0	-1.47075	-0.46461	0.653285	0.0469072	FALSE	FALSE	FALSE	FALSE	FALSE	FALSE	FALSE	FALSE	FALSE	FALSE
22	PPM1F	NP_055449.1	-4.0905	1	0	0	1	0	-1.47075	-0.686117	0.781944	0.0898738	FALSE	FALSE	FALSE	FALSE	FALSE	FALSE	FALSE	FALSE	FALSE	FALSE
1	DSTYK	NP_056190.1	-4.0905	4	0	0	3	1	-4.958	-1.51504	1.73519	0.0042996	FALSE	FALSE	FALSE	FALSE	FALSE	FALSE	TRUE	FALSE	FALSE	TRUE
19	HNRNPL	NP_001524.2	-4.0895	2	0	0	1	1	-2.05	-1.15971	1.03514	0.0815796	FALSE	FALSE	FALSE	FALSE	FALSE	TRUE	FALSE	FALSE	FALSE	FALSE
22	TPTEP2-CSNK1E	NP_001276841.1	-4.089	0	0	0	0	0	-4.21225	-0.849923	1.22045	0.00217918	FALSE	FALSE	FALSE	FALSE	FALSE	FALSE	FALSE	FALSE	FALSE	FALSE
1	ELAPOR1	NP_065826.3	-4.089	2	0	0	1	1	-2.0205	-1.34374	1.91256	0.158477	FALSE	FALSE	FALSE	FALSE	FALSE	FALSE	FALSE	FALSE	FALSE	FALSE
2	PER2	NP_073728.1	-4.087	4	0	0	1	3	-3.022	-1.68228	2.4983	0.0955093	FALSE	FALSE	FALSE	FALSE	FALSE	FALSE	FALSE	FALSE	FALSE	FALSE
2	ICA1L	NP_612477.3	-4.087	1	0	0	1	0	-1.46725	-0.577866	0.632012	0.069572	FALSE	FALSE	FALSE	FALSE	FALSE	FALSE	FALSE	FALSE	FALSE	FALSE
1	FHL3	NP_004459.2	-4.087	1	0	0	1	0					FALSE	FALSE	FALSE	FALSE	FALSE	FALSE	FALSE	FALSE	FALSE	FALSE
9	KCNT1	NP_065873.2	-4.0865	22	0	0	17	5	-23.663	-2.49827	3.18741	0	TRUE	FALSE	TRUE	FALSE	FALSE	FALSE	TRUE	TRUE	TRUE	TRUE
8	XKR4	NP_443130.1	-4.0865	2	0	0	2	0	-2.4615	-0.705879	0.840011	0.0186835	FALSE	FALSE	FALSE	FALSE	FALSE	FALSE	FALSE	FALSE	FALSE	FALSE
21	USP16	NP_001027582.1	-4.0865	2	0	0	1	1	-1.86	-1.01072	1.21968	0.107971	FALSE	FALSE	FALSE	FALSE	FALSE	FALSE	FALSE	FALSE	FALSE	FALSE
6	EPHA7	NP_004431.1	-4.086	4	0	0	2	2	-4.195	-1.46803	1.56298	0.0109051	FALSE	FALSE	FALSE	FALSE	FALSE	FALSE	FALSE	FALSE	FALSE	FALSE
11	SVIP	NP_683691.1	-4.086	1	0	0	1	0	-1.46625	-0.121683	0.142147	0.00439329	FALSE	FALSE	FALSE	FALSE	FALSE	FALSE	FALSE	FALSE	FALSE	FALSE
9	NTMT1	NP_001273725.1	-4.086	1	0	0	1	0	-1.46625	-0.40732	0.521835	0.0379876	FALSE	FALSE	FALSE	FALSE	FALSE	FALSE	FALSE	FALSE	FALSE	FALSE
7	PLXNA4	NP_065962.1	-4.0855	5	0	0	4	1	-3.188	-3.57317	3.74527	0.33827	FALSE	FALSE	FALSE	FALSE	FALSE	FALSE	FALSE	FALSE	FALSE	FALSE
5	WDR70	NP_060504.1	-4.0855	1	0	0	1	0	-1.46575	-1.08534	1.01326	0.168198	FALSE	FALSE	FALSE	FALSE	FALSE	FALSE	FALSE	FALSE	FALSE	FALSE
10	BTRC	NP_378663.1	-4.0855	3	0	0	1	2	-2.94425	-0.600411	0.70193	0.00473024	FALSE	FALSE	FALSE	FALSE	FALSE	FALSE	FALSE	FALSE	FALSE	FALSE
19	KLK1	NP_002248.1	-4.0855	1	0	0	1	0	-1.46575	-0.347066	0.466305	0.0280652	FALSE	FALSE	FALSE	FALSE	FALSE	FALSE	FALSE	FALSE	FALSE	FALSE
X	SERPINA7	NP_000345.2	-4.0855	1	0	0	1	0	-1.46575	-0.298708	0.298971	0.0204664	FALSE	FALSE	FALSE	FALSE	FALSE	FALSE	FALSE	FALSE	FALSE	FALSE
X	ATP6AP1	NP_001174.2	-4.085	2	0	0	2	0	-2.8105	-0.698833	0.541037	0.00720864	FALSE	FALSE	FALSE	FALSE	FALSE	FALSE	FALSE	FALSE	FALSE	FALSE
2	GLS	NP_055720.3	-4.085	2	0	0	2	0	-2.862	-1.12078	0.760615	0.0182622	FALSE	FALSE	FALSE	FALSE	FALSE	FALSE	FALSE	FALSE	FALSE	FALSE
13	GPC6	NP_005699.1	-4.085	2	0	0	1	1	-1.72	-0.707061	1.01479	0.072009	FALSE	FALSE	FALSE	FALSE	FALSE	FALSE	TRUE	FALSE	FALSE	TRUE
9	ACO1	NP_002188.1	-4.084	2	0	0	1	1	-2.108	-1.36891	1.6198	0.148071	FALSE	FALSE	FALSE	FALSE	FALSE	FALSE	FALSE	FALSE	FALSE	FALSE
8	PMP2	NP_002668.1	-4.084	1	0	0	1	0	-1.46425	-0.142009	0.199058	0.00654165	FALSE	FALSE	FALSE	FALSE	FALSE	FALSE	FALSE	FALSE	FALSE	FALSE
11	PGM2L1	NP_775853.2	-4.083	2	0	0	2	0	-2.5385	-0.939541	0.92533	0.0302285	FALSE	FALSE	FALSE	FALSE	FALSE	FALSE	TRUE	FALSE	FALSE	TRUE
15	OTUD7A	NP_570971.1	-4.083	3	0	0	2	1	-2.8095	-1.60805	1.95421	0.0919913	FALSE	FALSE	FALSE	FALSE	FALSE	FALSE	TRUE	FALSE	FALSE	TRUE
1	POU2F1	NP_002688.3	-4.0825	1	0	0	1	0	-1.46275	-0.949665	0.851305	0.1277	FALSE	FALSE	FALSE	FALSE	FALSE	FALSE	FALSE	FALSE	FALSE	FALSE
1	EMC1	NP_055862.1	-4.0825	2	0	0	2	0	-2.317	-1.54947	1.93902	0.156638	FALSE	FALSE	FALSE	FALSE	FALSE	FALSE	TRUE	FALSE	FALSE	TRUE
19	GRAMD1A	NP_001306965.1	-4.0825	3	0	0	3	0	-3.70475	-1.31365	1.77141	0.0158515	FALSE	FALSE	FALSE	FALSE	FALSE	FALSE	FALSE	FALSE	FALSE	FALSE
16	ARMC5	NP_001098717.1	-4.082	3	0	0	2	1	-2.85425	-1.25344	2.12743	0.0523632	FALSE	FALSE	FALSE	FALSE	FALSE	FALSE	FALSE	FALSE	FALSE	FALSE
4	UBA6	NP_060697.4	-4.0815	4	0	0	3	1	-3.665	-1.28333	1.50002	0.0161102	FALSE	FALSE	FALSE	FALSE	FALSE	FALSE	FALSE	FALSE	FALSE	FALSE
7	SERPINE1	NP_000593.1	-4.0815	2	0	0	1	1	-1.7115	-0.558417	0.789182	0.0429733	FALSE	FALSE	FALSE	FALSE	FALSE	FALSE	FALSE	FALSE	FALSE	FALSE
10	BMPR1A	NP_004320.2	-4.081	2	0	0	2	0	-2.3195	-0.992404	0.925957	0.0443124	FALSE	FALSE	FALSE	FALSE	FALSE	FALSE	FALSE	FALSE	FALSE	FALSE
22	MICAL3	NP_056056.2	-4.0805	3	0	0	1	2	-2.47775	-3.06309	4.51629	0.529381	FALSE	FALSE	FALSE	FALSE	FALSE	FALSE	FALSE	FALSE	FALSE	FALSE
12	NUP107	NP_065134.1	-4.08	3	0	0	3	0	-3.65125	-1.35477	1.33713	0.0162689	FALSE	FALSE	FALSE	FALSE	FALSE	FALSE	TRUE	FALSE	FALSE	TRUE
9	BNC2	NP_060107.3	-4.0795	2	0	0	1	1	-1.7125	-1.24782	1.84564	0.210771	FALSE	FALSE	FALSE	FALSE	FALSE	FALSE	TRUE	FALSE	FALSE	TRUE
19	MAP3K10	NP_002437.2	-4.0795	4	0	0	2	2	-3.1355	-2.07805	2.93063	0.144503	FALSE	FALSE	FALSE	FALSE	FALSE	FALSE	FALSE	FALSE	FALSE	FALSE
11	DKK3	NP_056965.3	-4.0795	1	0	0	1	0	-1.45975	-0.481236	0.594642	0.0515156	FALSE	FALSE	FALSE	FALSE	FALSE	FALSE	FALSE	FALSE	FALSE	FALSE
12	KCNH3	NP_036416.1	-4.078	6	0	0	2	4	-5.2145	-2.71798	2.43597	0.0221886	FALSE	FALSE	FALSE	FALSE	FALSE	FALSE	FALSE	FALSE	FALSE	FALSE
19	RNF126	NP_919442.1	-4.078	2	0	0	1	1	-1.46825	-0.470115	0.887298	0.0562047	FALSE	FALSE	FALSE	FALSE	FALSE	FALSE	FALSE	FALSE	FALSE	FALSE
X	IL1RAPL1	NP_055086.1	-4.0775	2	0	0	2	0	-2.2435	-0.74639	0.489674	0.0180514	FALSE	FALSE	FALSE	FALSE	FALSE	FALSE	TRUE	FALSE	FALSE	TRUE
12	MAP3K12	NP_001180440.1	-4.077	8	0	0	5	3	-6.978	-1.8207	1.5816	0.000371372	FALSE	FALSE	FALSE	FALSE	FALSE	FALSE	FALSE	FALSE	FALSE	FALSE
11	OR8D2	NP_001002918.1	-4.076	3	0	0	2	1	-2.92275	-0.240486	0.47068	0.000442851	FALSE	FALSE	FALSE	FALSE	FALSE	FALSE	FALSE	FALSE	FALSE	FALSE
19	IQCN	NP_001138776.1	-4.075	5	0	0	2	3	-3.58525	-1.74366	2.95836	0.0577419	FALSE	FALSE	FALSE	FALSE	FALSE	FALSE	FALSE	FALSE	FALSE	FALSE
16	ZNF668	NP_001166140.1	-4.075	2	0	0	2	0	-2.9025	-1.53547	2.02612	0.0809357	FALSE	FALSE	FALSE	FALSE	FALSE	FALSE	FALSE	FALSE	FALSE	FALSE
16	NHLRC4	NP_788850.1	-4.0745	1	0	0	1	0	-1.45475	-0.151604	0.210578	0.00618176	FALSE	FALSE	FALSE	FALSE	FALSE	TRUE	FALSE	FALSE	FALSE	FALSE
19	BCL3	NP_005169.2	-4.074	1	0	0	1	0	-1.45425	-0.933036	0.94363	0.137577	FALSE	FALSE	FALSE	FALSE	FALSE	FALSE	FALSE	FALSE	FALSE	FALSE
6	BRPF3	NP_056510.2	-4.074	1	0	0	1	0	-0.66725	-1.70033	1.87284	0.632653	FALSE	FALSE	FALSE	FALSE	FALSE	FALSE	FALSE	FALSE	FALSE	FALSE
13	GPALPP1	NP_001303880.1	-4.0735	1	0	0	1	0	-1.45375	-0.379599	0.426635	0.0326466	FALSE	FALSE	FALSE	FALSE	FALSE	FALSE	FALSE	FALSE	FALSE	FALSE
X	CXorf38	NP_659407.1	-4.0735	1	0	0	1	0	-1.08125	-0.496419	0.401845	0.0809348	FALSE	FALSE	FALSE	FALSE	FALSE	FALSE	FALSE	FALSE	FALSE	FALSE
5	IQGAP2	NP_006624.3	-4.073	4	0	0	2	2	-1.7795	-1.61872	2.02403	0.289636	FALSE	FALSE	FALSE	FALSE	FALSE	FALSE	FALSE	FALSE	FALSE	FALSE
11	KIAA1549L	NP_036326.3	-4.0715	8	0	0	6	2	-9.80975	-3.04845	3.58569	0.000298903	FALSE	FALSE	FALSE	FALSE	FALSE	FALSE	FALSE	FALSE	FALSE	FALSE
6	CYP39A1	NP_057677.2	-4.0705	1	0	0	1	0	-1.45075	-0.565367	0.715192	0.0703355	FALSE	FALSE	FALSE	FALSE	FALSE	FALSE	FALSE	FALSE	FALSE	FALSE
X	SMARCA1	NP_003060.2	-4.0705	2	0	0	2	0	-2.489	-1.31502	0.888658	0.044668	FALSE	FALSE	FALSE	TRUE	FALSE	FALSE	FALSE	FALSE	FALSE	TRUE
10	BUB3	NP_004716.1	-4.07	1	0	0	1	0	-1.45025	-0.689537	0.657697	0.0850709	FALSE	FALSE	FALSE	FALSE	FALSE	FALSE	FALSE	FALSE	FALSE	FALSE
3	COPG1	NP_057212.1	-4.0695	1	0	0	1	0	-1.44975	-1.64958	1.79364	0.349996	FALSE	FALSE	FALSE	FALSE	FALSE	FALSE	FALSE	FALSE	FALSE	FALSE
5	ADAMTS6	NP_922932.2	-4.0695	4	0	0	3	1	-3.5155	-1.83437	1.64818	0.0422943	FALSE	FALSE	FALSE	FALSE	FALSE	FALSE	FALSE	FALSE	FALSE	FALSE
1	ENO1	NP_001419.1	-4.0695	3	0	0	1	2	-2.32975	-0.521532	0.814799	0.012483	FALSE	FALSE	FALSE	FALSE	FALSE	FALSE	FALSE	FALSE	FALSE	FALSE
13	SLC7A1	NP_003036.1	-4.069	1	0	0	1	0	-1.44925	-1.12195	0.962758	0.15866	FALSE	FALSE	FALSE	FALSE	FALSE	FALSE	FALSE	FALSE	FALSE	FALSE
16	RNPS1	NP_001273554.1	-4.069	1	0	0	1	0	-1.44925	-0.439964	0.642806	0.0471792	FALSE	FALSE	FALSE	FALSE	FALSE	FALSE	FALSE	FALSE	FALSE	FALSE
19	IZUMO1	NP_872381.2	-4.069	2	0	0	2	0	-2.698	-0.724963	0.722609	0.0126162	FALSE	FALSE	FALSE	FALSE	FALSE	FALSE	FALSE	FALSE	FALSE	FALSE
14	PRKD1	NP_002733.2	-4.0685	7	0	0	4	3	-6.88225	-1.20335	1.60284	3.08361e-05	FALSE	FALSE	FALSE	FALSE	FALSE	FALSE	TRUE	FALSE	FALSE	TRUE
X	PPEF1	NP_006231.2	-4.0675	2	0	0	1	1	-2.098	-0.939966	0.59637	0.0334282	FALSE	FALSE	FALSE	FALSE	FALSE	FALSE	FALSE	FALSE	FALSE	FALSE
1	CADM3	NP_067012.1	-4.0675	2	0	0	2	0	-2.877	-0.701971	0.75009	0.00841088	FALSE	FALSE	FALSE	FALSE	FALSE	FALSE	FALSE	FALSE	FALSE	FALSE
1	NPHS2	NP_055440.1	-4.0665	1	0	0	1	0	-1.44675	-0.344358	0.400877	0.0288672	FALSE	FALSE	FALSE	FALSE	FALSE	FALSE	TRUE	FALSE	FALSE	TRUE
7	DYNC1I1	NP_004402.1	-4.0665	1	0	0	1	0	-1.44675	-1.21847	1.22963	0.213445	FALSE	FALSE	FALSE	FALSE	FALSE	FALSE	FALSE	FALSE	FALSE	FALSE
3	CCR1	NP_001286.1	-4.066	3	0	0	2	1	-3.89875	-0.529434	0.562406	0.000520133	FALSE	FALSE	FALSE	FALSE	FALSE	FALSE	FALSE	FALSE	FALSE	FALSE
10	CSGALNACT2	NP_061060.3	-4.066	2	0	0	2	0	-2.7995	-0.674285	0.911751	0.0101197	FALSE	FALSE	FALSE	FALSE	FALSE	FALSE	FALSE	FALSE	FALSE	FALSE
2	SNRPG	NP_003087.1	-4.066	1	0	0	1	0	-2.69825	-0.265599	0.119148	0.000683864	FALSE	FALSE	FALSE	FALSE	FALSE	FALSE	FALSE	FALSE	FALSE	FALSE
20	RTEL1	NP_116575.3	-4.066	4	0	0	2	2	-2.7855	-1.26672	2.04809	0.0671165	FALSE	FALSE	FALSE	FALSE	FALSE	TRUE	TRUE	FALSE	FALSE	TRUE
7	STEAP1	NP_036581.1	-4.066	1	0	0	1	0	-1.44625	-0.354946	0.436541	0.0311371	FALSE	FALSE	FALSE	FALSE	FALSE	FALSE	FALSE	FALSE	FALSE	FALSE
16	MMP2	NP_004521.1	-4.0655	2	0	0	1	1	-1.9895	-1.05642	1.42323	0.106545	FALSE	FALSE	FALSE	FALSE	FALSE	FALSE	FALSE	FALSE	FALSE	FALSE
11	SESN3	NP_653266.2	-4.0655	2	0	0	2	0	-2.598	-0.875282	0.758921	0.0204398	FALSE	FALSE	FALSE	FALSE	FALSE	FALSE	FALSE	FALSE	FALSE	FALSE
X	RENBP	NP_002901.2	-4.0655	2	0	0	1	1	-2.0005	-0.50209	0.555444	0.019296	FALSE	FALSE	FALSE	FALSE	FALSE	FALSE	FALSE	FALSE	FALSE	FALSE
12	FAM186B	NP_115506.1	-4.0655	2	0	0	1	1	-1.971	-1.24367	1.62899	0.153377	FALSE	FALSE	FALSE	FALSE	FALSE	FALSE	FALSE	FALSE	FALSE	FALSE
3	ZNF148	NP_068799.2	-4.0655	4	0	0	4	0	0	-0.232477	0.0840514	1	FALSE	FALSE	FALSE	FALSE	FALSE	FALSE	TRUE	TRUE	FALSE	TRUE
14	YLPM1	NP_062535.2	-4.065	4	0	0	2	2	-3.753	-2.46878	3.17791	0.12438	FALSE	FALSE	FALSE	FALSE	FALSE	FALSE	FALSE	FALSE	FALSE	FALSE
9	AK8	NP_689785.1	-4.065	6	0	0	4	2	-4.797	-0.751786	0.954053	0.000262688	FALSE	FALSE	FALSE	FALSE	FALSE	FALSE	FALSE	FALSE	FALSE	FALSE
12	TAS2R7	NP_076408.1	-4.065	1	0	0	1	0	-1.44525	-0.243933	0.443336	0.0171438	FALSE	FALSE	FALSE	FALSE	FALSE	FALSE	FALSE	FALSE	FALSE	FALSE
6	MTO1	NP_036255.2	-4.065	2	0	0	2	0	-2.719	-1.04677	1.24027	0.0344913	FALSE	FALSE	FALSE	FALSE	FALSE	FALSE	TRUE	FALSE	FALSE	TRUE
8	SLC20A2	NP_006740.1	-4.064	2	0	0	2	0	-2.4495	-1.42704	1.48458	0.0936347	FALSE	FALSE	FALSE	FALSE	FALSE	FALSE	FALSE	FALSE	FALSE	TRUE
17	TNFSF12	NP_003800.1	-4.063	2	0	0	1	1	-2.1625	-0.464055	0.672612	0.0114869	FALSE	FALSE	FALSE	FALSE	FALSE	FALSE	FALSE	FALSE	FALSE	FALSE
9	NR6A1	NP_201591.2	-4.062	4	0	0	2	2	-3.432	-0.86612	0.812344	0.005356	FALSE	FALSE	FALSE	FALSE	FALSE	FALSE	FALSE	FALSE	FALSE	FALSE
4	PAPSS1	NP_005434.4	-4.0615	1	0	0	1	0	-1.44175	-0.57783	0.714945	0.0747049	FALSE	FALSE	FALSE	FALSE	FALSE	FALSE	FALSE	FALSE	FALSE	FALSE
10	PPP1R3C	NP_005389.1	-4.061	2	0	0	2	0	-2.3695	-0.377666	0.383187	0.00433875	FALSE	FALSE	FALSE	FALSE	FALSE	FALSE	FALSE	FALSE	FALSE	FALSE
16	TAOK2	NP_057235.2	-4.0595	1	0	0	1	0	-1.43975	-2.05068	2.11099	0.439914	FALSE	FALSE	FALSE	FALSE	FALSE	FALSE	FALSE	FALSE	FALSE	FALSE
5	NDFIP1	NP_085048.1	-4.059	1	0	0	1	0	-1.43925	-0.386465	0.311639	0.0304179	FALSE	FALSE	FALSE	FALSE	FALSE	FALSE	FALSE	FALSE	FALSE	FALSE
17	ABCA8	NP_009099.1	-4.059	7	0	0	3	4	-6.06625	-1.33817	1.63023	0.000330369	FALSE	FALSE	FALSE	FALSE	FALSE	FALSE	FALSE	FALSE	FALSE	FALSE
2	BUB1	NP_004327.1	-4.0585	2	0	0	1	1	-1.951	-1.36206	1.58668	0.172609	FALSE	FALSE	FALSE	FALSE	FALSE	FALSE	FALSE	FALSE	FALSE	FALSE
15	AQR	NP_055506.1	-4.0585	1	0	0	1	0	-1.43875	-2.75528	2.31556	0.526845	FALSE	FALSE	FALSE	FALSE	FALSE	FALSE	FALSE	FALSE	FALSE	FALSE
10	SLC25A28	NP_112489.3	-4.0585	2	0	0	1	1	-2.5655	-0.972448	0.634665	0.0179526	FALSE	FALSE	FALSE	FALSE	FALSE	FALSE	FALSE	FALSE	FALSE	FALSE
17	TRPV3	NP_659505.1	-4.057	3	0	0	1	2	-2.17025	-0.962239	1.56694	0.0726126	FALSE	FALSE	FALSE	FALSE	FALSE	FALSE	TRUE	FALSE	FALSE	TRUE
19	EPOR	NP_000112.1	-4.057	1	0	0	1	0	-1.43725	-0.906094	1.29617	0.17565	FALSE	FALSE	FALSE	FALSE	FALSE	FALSE	FALSE	FALSE	FALSE	FALSE
3	RNF123	NP_071347.2	-4.055	4	0	0	4	0	-4.406	-2.60001	2.97025	0.0699323	FALSE	FALSE	FALSE	FALSE	FALSE	FALSE	FALSE	FALSE	FALSE	FALSE
1	OR2W3	NP_001001957.2	-4.054	1	0	0	1	0	-1.43425	-0.199481	0.587533	0.0152782	FALSE	FALSE	FALSE	FALSE	FALSE	FALSE	FALSE	FALSE	FALSE	FALSE
11	OR2AG2	NP_001004490.1	-4.0535	2	0	0	1	1	-1.72225	-0.207121	0.50984	0.00893998	FALSE	FALSE	FALSE	FALSE	FALSE	FALSE	FALSE	FALSE	FALSE	FALSE
17	MNT	NP_064706.1	-4.053	5	0	0	3	2	-4.79775	-0.877442	1.37367	0.000590519	FALSE	FALSE	FALSE	FALSE	FALSE	FALSE	FALSE	FALSE	FALSE	FALSE
16	CDH13	NP_001248.1	-4.053	5	0	0	1	4	-3.34475	-0.607912	1.12549	0.00235337	FALSE	FALSE	FALSE	FALSE	FALSE	TRUE	FALSE	FALSE	FALSE	FALSE
12	MYBPC1	NP_002456.2	-4.05	5	0	0	3	2	-4.56125	-1.70371	1.8564	0.0116318	FALSE	FALSE	FALSE	FALSE	FALSE	FALSE	TRUE	FALSE	FALSE	TRUE
2	PAX8	NP_003457.1	-4.0495	3	0	0	2	1	-3.32425	-0.636557	1.0299	0.00306761	FALSE	FALSE	FALSE	FALSE	FALSE	FALSE	TRUE	FALSE	FALSE	TRUE
11	USP47	NP_001317137.1	-4.0495	3	0	0	3	0	-3.05775	-2.14024	2.08167	0.119949	FALSE	FALSE	FALSE	FALSE	FALSE	FALSE	FALSE	FALSE	FALSE	FALSE
12	PHB2	NP_001138303.1	-4.0495	1	0	0	1	0	-1.42975	-0.542352	0.569574	0.0617486	FALSE	FALSE	FALSE	FALSE	FALSE	FALSE	FALSE	FALSE	FALSE	FALSE
1	LMNA	NP_005563.1	-4.049	2	0	0	2	0	-2.25	-1.4933	1.53596	0.119408	FALSE	FALSE	FALSE	FALSE	FALSE	FALSE	TRUE	FALSE	FALSE	TRUE
11	NAA40	NP_079047.2	-4.049	1	0	0	1	0	-1.54425	-0.348722	0.499761	0.0264522	FALSE	FALSE	FALSE	FALSE	FALSE	FALSE	FALSE	FALSE	FALSE	FALSE
13	GRK1	NP_002920.1	-4.0485	2	0	0	2	0	-2.3575	-0.696236	0.765872	0.0209503	FALSE	FALSE	FALSE	FALSE	FALSE	FALSE	FALSE	FALSE	FALSE	FALSE
13	MYO16	NP_055826.1	-4.0485	7	0	0	2	5	-4.47775	-2.39313	3.82156	0.0648055	FALSE	FALSE	FALSE	FALSE	FALSE	FALSE	FALSE	FALSE	FALSE	FALSE
20	PTPRT	NP_573400.3	-4.048	8	0	0	3	5	-5.125	-2.71753	3.11662	0.038676	FALSE	FALSE	FALSE	FALSE	FALSE	FALSE	FALSE	FALSE	FALSE	FALSE
19	DMWD	NP_004934.1	-4.048	2	0	0	1	1	-2.115	-1.06735	1.49451	0.0931169	FALSE	FALSE	FALSE	FALSE	FALSE	FALSE	FALSE	FALSE	FALSE	FALSE
21	ITSN1	NP_001001132.1	-4.048	3	0	0	3	0	-3.80625	-1.99401	2.05375	0.0480945	FALSE	FALSE	FALSE	FALSE	FALSE	FALSE	FALSE	FALSE	FALSE	FALSE
2	INO80D	NP_060229.3	-4.048	2	0	0	2	0	-2.676	-1.77418	1.80773	0.118673	FALSE	FALSE	FALSE	FALSE	FALSE	FALSE	FALSE	FALSE	FALSE	FALSE
5	LRRC14B	NP_001073947.1	-4.048	2	0	0	1	1	-1.6375	-0.494178	1.30391	0.0423005	FALSE	FALSE	FALSE	FALSE	FALSE	FALSE	FALSE	FALSE	FALSE	FALSE
22	FBLN1	NP_006477.3	-4.048	4	0	0	1	3	-1.9045	-0.970924	1.34291	0.0950005	FALSE	FALSE	FALSE	FALSE	FALSE	FALSE	TRUE	FALSE	FALSE	TRUE
16	PHAF1	NP_079463.2	-4.047	1	0	0	1	0	-1.46925	-0.556341	0.739093	0.0638235	FALSE	FALSE	FALSE	FALSE	FALSE	FALSE	FALSE	FALSE	FALSE	FALSE
4	SPARCL1	NP_001121782.1	-4.0465	1	0	0	1	0	-1.42675	-0.873218	0.980349	0.143534	FALSE	FALSE	FALSE	FALSE	FALSE	FALSE	FALSE	FALSE	FALSE	FALSE
15	LRRC49	NP_001185947.1	-4.0465	3	0	0	2	1	-3.02175	-0.868633	1.02727	0.0121587	FALSE	FALSE	FALSE	FALSE	FALSE	FALSE	FALSE	FALSE	FALSE	FALSE
12	CELA1	NP_001962.3	-4.046	1	0	0	1	0	-1.42925	-0.314933	0.481292	0.0254762	FALSE	FALSE	FALSE	FALSE	FALSE	FALSE	FALSE	FALSE	FALSE	FALSE
15	EPB42	NP_000110.2	-4.046	3	0	0	3	0	-3.72475	-1.0541	1.27586	0.00740766	FALSE	FALSE	FALSE	FALSE	FALSE	FALSE	FALSE	FALSE	FALSE	FALSE
14	TDRD9	NP_694591.2	-4.046	1	0	0	1	0	-1.22125	-1.97047	2.29424	0.560918	FALSE	FALSE	FALSE	FALSE	FALSE	FALSE	FALSE	FALSE	FALSE	FALSE
13	KLHL1	NP_065917.1	-4.0455	1	0	0	1	0	-1.42575	-0.696324	0.848134	0.103173	FALSE	FALSE	FALSE	FALSE	FALSE	FALSE	FALSE	FALSE	FALSE	FALSE
19	ARID3A	NP_005215.1	-4.0445	2	0	0	1	1	-1.4475	-0.930252	1.10411	0.152123	FALSE	FALSE	FALSE	FALSE	FALSE	FALSE	FALSE	FALSE	FALSE	FALSE
9	FKBP15	NP_056073.1	-4.044	4	0	0	2	2	-2.7785	-1.7238	2.04248	0.118504	FALSE	FALSE	FALSE	FALSE	FALSE	FALSE	FALSE	FALSE	FALSE	FALSE
14	TMEM63C	NP_065164.2	-4.044	5	0	0	4	1	-5.63725	-1.50846	1.62889	0.00138891	FALSE	FALSE	FALSE	FALSE	FALSE	FALSE	TRUE	FALSE	FALSE	TRUE
14	RALGAPA1	NP_055805.1	-4.043	5	0	0	4	1	-4.98725	-2.09149	1.97749	0.0122054	FALSE	FALSE	FALSE	FALSE	FALSE	FALSE	TRUE	FALSE	FALSE	TRUE
5	TRAPPC13	NP_001087224.1	-4.0425	1	0	0	1	0	-1.42275	-0.61854	0.609022	0.0735131	FALSE	FALSE	FALSE	FALSE	FALSE	FALSE	FALSE	FALSE	FALSE	FALSE
14	OR4K1	NP_001004063.2	-4.0425	2	0	0	1	1	-1.8105	-0.240038	0.497752	0.00654467	FALSE	FALSE	FALSE	FALSE	FALSE	TRUE	FALSE	FALSE	FALSE	FALSE
9	FAM120A	NP_055427.2	-4.0425	2	0	0	2	0	0	-0.424418	0.287525	1	FALSE	FALSE	FALSE	FALSE	FALSE	FALSE	FALSE	FALSE	FALSE	FALSE
3	MYLK	NP_444253.3	-4.0425	3	0	0	2	1	-2.86475	-2.02768	2.73453	0.17838	FALSE	FALSE	FALSE	FALSE	FALSE	FALSE	TRUE	FALSE	FALSE	TRUE
12	SLC41A2	NP_115524.3	-4.042	1	0	0	1	0	-1.42225	-0.802297	0.615776	0.0893201	FALSE	FALSE	FALSE	FALSE	FALSE	FALSE	FALSE	FALSE	FALSE	FALSE
8	CPA6	NP_065094.3	-4.042	1	0	0	1	0	-1.42225	-0.39683	0.638032	0.0410262	FALSE	FALSE	FALSE	FALSE	FALSE	FALSE	FALSE	FALSE	FALSE	TRUE
7	SAMD9	NP_060124.2	-4.042	11	0	0	9	2	-11.5068	-2.00396	2.2392	2.97462e-07	TRUE	FALSE	TRUE	FALSE	FALSE	FALSE	TRUE	TRUE	TRUE	TRUE
X	LHFPL1	NP_835469.1	-4.0415	1	0	0	1	0	-1.42175	-0.256781	0.194562	0.0164765	FALSE	FALSE	FALSE	FALSE	FALSE	FALSE	FALSE	FALSE	FALSE	FALSE
19	RBM42	NP_077297.2	-4.0415	2	0	0	2	0	-2.744	-0.863664	0.882244	0.0182165	FALSE	FALSE	FALSE	FALSE	FALSE	FALSE	FALSE	FALSE	FALSE	FALSE
11	TMEM151A	NP_694998.1	-4.041	1	0	0	1	0	-1.42125	-0.862445	1.66356	0.179748	FALSE	FALSE	FALSE	FALSE	FALSE	FALSE	FALSE	FALSE	FALSE	FALSE
3	DCAF1	NP_055518.1	-4.041	2	0	0	2	0	-2.7725	-3.95556	2.58327	0.27513	FALSE	FALSE	FALSE	FALSE	FALSE	FALSE	FALSE	FALSE	FALSE	FALSE
6	TAB2	NP_055908.1	-4.04	4	0	0	4	0	-3.8985	-1.20742	1.11308	0.00737145	FALSE	FALSE	FALSE	FALSE	FALSE	FALSE	TRUE	TRUE	FALSE	TRUE
13	SLAIN1	NP_001035243.2	-4.0395	1	0	0	1	0	-1.75725	-0.516132	0.649803	0.0342551	FALSE	FALSE	FALSE	FALSE	FALSE	FALSE	FALSE	FALSE	FALSE	FALSE
12	ZNF740	NP_001004304.1	-4.0395	3	0	0	2	1	-3.36975	-0.311387	0.275793	0.000275468	FALSE	FALSE	FALSE	FALSE	FALSE	FALSE	FALSE	FALSE	FALSE	FALSE
9	NAA35	NP_078911.3	-4.0385	1	0	0	1	0	-1.41875	-1.3551	1.11557	0.21739	FALSE	FALSE	FALSE	FALSE	FALSE	FALSE	FALSE	FALSE	FALSE	FALSE
20	TASP1	NP_060184.2	-4.0385	1	0	0	1	0	-1.41875	-0.614877	0.494773	0.0615937	FALSE	FALSE	FALSE	FALSE	FALSE	FALSE	TRUE	FALSE	FALSE	TRUE
10	LCOR	NP_001333445.1	-4.038	3	0	0	2	1	0	-0.174171	0.182544	1	FALSE	FALSE	FALSE	FALSE	FALSE	FALSE	FALSE	FALSE	FALSE	FALSE
2	TMBIM1	NP_001308357.1	-4.038	3	0	0	1	2	-1.91275	-0.398248	0.623138	0.0151072	FALSE	FALSE	FALSE	FALSE	FALSE	FALSE	FALSE	FALSE	FALSE	FALSE
20	TNNC2	NP_003270.1	-4.038	2	0	0	2	0	-2.8365	-0.415243	0.39511	0.00212166	FALSE	FALSE	FALSE	FALSE	FALSE	FALSE	FALSE	FALSE	FALSE	FALSE
3	MED12L	NP_443728.3	-4.0375	6	0	0	5	1	-5.9875	-3.57874	3.69534	0.0444554	FALSE	FALSE	FALSE	FALSE	FALSE	FALSE	FALSE	FALSE	FALSE	FALSE
21	DSCAM	NP_001380.2	-4.037	5	0	0	4	1	-4.45525	-3.73638	3.71228	0.162314	FALSE	FALSE	FALSE	FALSE	FALSE	FALSE	FALSE	FALSE	FALSE	FALSE
9	SCAI	NP_775961.2	-4.037	1	0	0	1	0	-1.17825	-1.26171	0.944641	0.226378	FALSE	FALSE	FALSE	FALSE	FALSE	FALSE	FALSE	FALSE	FALSE	FALSE
4	SLC25A4	NP_001142.2	-4.037	2	0	0	2	0	-2.6135	-0.623373	0.616769	0.00965195	FALSE	FALSE	FALSE	FALSE	FALSE	FALSE	TRUE	FALSE	FALSE	TRUE
17	PRR11	NP_060774.2	-4.0365	1	0	0	1	0	-1.41675	-0.46048	0.567747	0.051828	FALSE	FALSE	FALSE	FALSE	FALSE	FALSE	FALSE	FALSE	FALSE	FALSE
6	PRIM2	NP_001269417.1	-4.0365	2	0	0	2	0	-2.81	-0.286758	0.225006	0.000531037	FALSE	FALSE	FALSE	FALSE	FALSE	FALSE	FALSE	FALSE	FALSE	FALSE
20	NRSN2	NP_001310609.1	-4.0355	1	0	0	1	0	-1.41575	-0.206628	0.446633	0.0140162	FALSE	FALSE	FALSE	FALSE	FALSE	FALSE	FALSE	FALSE	FALSE	FALSE
7	AKR1D1	NP_005980.1	-4.0345	1	0	0	1	0	-1.41475	-0.351841	0.441269	0.0316456	FALSE	FALSE	FALSE	FALSE	FALSE	FALSE	TRUE	FALSE	FALSE	TRUE
19	PNMA8A	NP_060685.2	-4.034	3	0	0	2	1	-2.50275	-0.741927	0.8412	0.0179895	FALSE	FALSE	FALSE	FALSE	FALSE	FALSE	FALSE	FALSE	FALSE	FALSE
12	STYK1	NP_060893.2	-4.0335	2	0	0	2	0	-2.576	-0.39701	0.542332	0.00338154	FALSE	FALSE	FALSE	FALSE	FALSE	FALSE	FALSE	FALSE	FALSE	FALSE
22	MOV10L1	NP_061868.1	-4.0335	3	0	0	2	1	-3.10275	-1.77814	2.28611	0.0943236	FALSE	FALSE	FALSE	FALSE	FALSE	FALSE	FALSE	FALSE	FALSE	FALSE
X	FRMD7	NP_919253.1	-4.0335	2	0	0	2	0	-2.47	-0.506637	0.424868	0.00687408	FALSE	FALSE	FALSE	FALSE	FALSE	FALSE	TRUE	FALSE	FALSE	TRUE
17	ALOX12B	NP_001130.1	-4.0325	1	0	0	1	0	-1.41275	-1.14163	1.3922	0.242987	FALSE	FALSE	FALSE	FALSE	FALSE	FALSE	FALSE	FALSE	FALSE	FALSE
6	DAXX	NP_001341.1	-4.0325	2	0	0	2	0	-2.427	-1.19679	1.46011	0.0759149	FALSE	FALSE	FALSE	FALSE	FALSE	FALSE	FALSE	FALSE	FALSE	FALSE
8	FZD6	NP_001158087.1	-4.032	1	0	0	1	0	-1.45125	-0.727193	0.815421	0.100217	FALSE	FALSE	FALSE	FALSE	FALSE	FALSE	TRUE	FALSE	FALSE	TRUE
1	PIK3C2B	NP_002637.3	-4.0315	4	0	0	3	1	-3.7895	-2.36099	2.89199	0.100663	FALSE	FALSE	FALSE	FALSE	FALSE	FALSE	FALSE	FALSE	FALSE	FALSE
1	USP48	NP_115612.4	-4.0315	2	0	0	2	0	-2.5655	-2.225	1.73824	0.145402	FALSE	FALSE	FALSE	FALSE	FALSE	FALSE	FALSE	FALSE	FALSE	FALSE
8	ZHX2	NP_055758.1	-4.0305	1	0	0	1	0	-1.41075	-1.22795	1.72312	0.284518	FALSE	FALSE	FALSE	FALSE	FALSE	FALSE	FALSE	FALSE	FALSE	FALSE
15	PLCB2	NP_004564.2	-4.03	1	0	0	1	0	-1.41025	-1.49523	1.85614	0.358452	FALSE	FALSE	FALSE	FALSE	FALSE	FALSE	FALSE	FALSE	FALSE	FALSE
10	XPNPEP1	NP_065116.3	-4.03	3	0	0	2	1	-2.86975	-1.23329	1.17756	0.0350609	FALSE	FALSE	FALSE	FALSE	FALSE	FALSE	FALSE	FALSE	FALSE	FALSE
3	NMD3	NP_057022.2	-4.0295	1	0	0	1	0	-1.67125	-0.563433	0.797197	0.0464666	FALSE	FALSE	FALSE	FALSE	FALSE	FALSE	FALSE	FALSE	FALSE	FALSE
1	ZYG11A	NP_001004339.2	-4.0295	3	0	0	2	1	-2.50075	-0.803129	1.07872	0.0263523	FALSE	FALSE	FALSE	FALSE	FALSE	FALSE	FALSE	FALSE	FALSE	FALSE
5	SLF1	NP_115666.2	-4.029	1	0	0	1	0	-1.40925	-0.797967	1.01987	0.138745	FALSE	FALSE	FALSE	FALSE	FALSE	FALSE	FALSE	FALSE	FALSE	FALSE
22	PICK1	NP_036539.1	-4.029	2	0	0	1	1	-2.117	-0.92718	0.98672	0.0574302	FALSE	FALSE	FALSE	FALSE	FALSE	FALSE	FALSE	FALSE	FALSE	FALSE
12	SARNP	NP_149073.1	-4.029	1	0	0	1	0	-1.51125	-0.344289	0.312767	0.0234667	FALSE	FALSE	FALSE	FALSE	FALSE	FALSE	FALSE	FALSE	FALSE	FALSE
14	PTPN21	NP_008970.2	-4.029	3	0	0	1	2	-2.68125	-1.61976	2.72999	0.133426	FALSE	FALSE	FALSE	FALSE	FALSE	FALSE	FALSE	FALSE	FALSE	FALSE
2	PLEKHB2	NP_001253991.1	-4.0285	1	0	0	1	0	-1.42025	-0.361728	0.494719	0.0345685	FALSE	FALSE	FALSE	FALSE	FALSE	FALSE	FALSE	FALSE	FALSE	FALSE
19	C19orf44	NP_115583.1	-4.0285	1	0	0	1	0	-1.40875	-0.884073	1.26981	0.171364	FALSE	FALSE	FALSE	FALSE	FALSE	FALSE	FALSE	FALSE	FALSE	FALSE
16	SGF29	NP_612423.1	-4.0285	1	0	0	1	0	-1.40875	-0.865016	0.695259	0.111851	FALSE	FALSE	FALSE	FALSE	FALSE	FALSE	FALSE	FALSE	FALSE	FALSE
7	CARD11	NP_115791.3	-4.0285	4	0	0	4	0	-4.572	-2.55717	2.87129	0.0533044	FALSE	FALSE	FALSE	FALSE	FALSE	FALSE	FALSE	FALSE	FALSE	FALSE
1	GNPAT	NP_055051.1	-4.028	1	0	0	1	0	-1.40825	-0.803724	1.00329	0.135208	FALSE	FALSE	FALSE	FALSE	FALSE	FALSE	TRUE	FALSE	FALSE	TRUE
X	ACE2	NP_068576.1	-4.028	1	0	0	1	0	-1.40825	-0.665148	0.48571	0.0679375	FALSE	FALSE	FALSE	FALSE	FALSE	FALSE	FALSE	FALSE	FALSE	FALSE
11	OR56B4	NP_001005181.1	-4.0275	1	0	0	1	0	-1.40775	-0.137124	0.436799	0.00615014	FALSE	FALSE	FALSE	FALSE	FALSE	FALSE	FALSE	FALSE	FALSE	FALSE
3	PLCH1	NP_001124432.1	-4.0275	1	0	0	1	0	-1.40775	-1.80345	1.8076	0.394965	FALSE	FALSE	FALSE	FALSE	FALSE	FALSE	TRUE	FALSE	FALSE	TRUE
2	GLI2	NP_005261.2	-4.0275	4	0	0	3	1	-3.401	-2.25305	3.60472	0.151415	FALSE	FALSE	FALSE	FALSE	FALSE	FALSE	TRUE	FALSE	FALSE	TRUE
11	CASP5	NP_004338.3	-4.027	2	0	0	2	0	-2.549	-0.476059	0.669355	0.00510264	FALSE	FALSE	FALSE	FALSE	FALSE	FALSE	FALSE	FALSE	FALSE	FALSE
18	PTPRM	NP_001098714.1	-4.0265	3	0	0	3	0	-3.18225	-2.43264	2.7728	0.174864	FALSE	FALSE	FALSE	FALSE	FALSE	FALSE	FALSE	FALSE	FALSE	FALSE
16	RBL2	NP_001310537.1	-4.0265	1	0	0	1	0	-1.05825	-1.49507	1.76874	0.454268	FALSE	FALSE	FALSE	FALSE	FALSE	FALSE	FALSE	FALSE	FALSE	FALSE
21	GART	NP_000810.1	-4.026	4	0	0	3	1	-3.23775	-0.963535	1.21323	0.0126823	FALSE	FALSE	FALSE	FALSE	FALSE	FALSE	FALSE	FALSE	FALSE	FALSE
20	TFAP2C	NP_003213.1	-4.0255	2	0	0	1	1	-1.91	-0.822363	0.933311	0.0618308	FALSE	FALSE	FALSE	FALSE	FALSE	FALSE	FALSE	FALSE	FALSE	FALSE
16	ZNF48	NP_001201835.1	-4.0245	2	0	0	1	1	-2.5235	-0.99914	1.51619	0.0454137	FALSE	FALSE	FALSE	FALSE	FALSE	FALSE	FALSE	FALSE	FALSE	FALSE
1	COL8A2	NP_005193.1	-4.024	1	0	0	1	0	-1.40425	-1.03007	1.2999	0.205734	FALSE	FALSE	FALSE	FALSE	FALSE	FALSE	FALSE	FALSE	FALSE	FALSE
10	CWF19L1	NP_060764.3	-4.0235	1	0	0	1	0	-1.40375	-0.668967	0.822838	0.0980838	FALSE	FALSE	FALSE	FALSE	FALSE	FALSE	FALSE	FALSE	FALSE	FALSE
19	MAP2K2	NP_109587.1	-4.0235	3	0	0	1	2	-2.13625	-0.500251	0.61358	0.0149477	FALSE	FALSE	FALSE	FALSE	FALSE	FALSE	TRUE	FALSE	FALSE	TRUE
15	PEAK1	NP_079052.2	-4.0235	3	0	0	1	2	-2.89475	-1.94293	2.87475	0.158697	FALSE	FALSE	FALSE	FALSE	FALSE	FALSE	FALSE	FALSE	FALSE	FALSE
16	UTP4	NP_116219.2	-4.023	3	0	0	2	1	-3.21225	-0.94763	1.26697	0.0130768	FALSE	FALSE	FALSE	FALSE	FALSE	FALSE	TRUE	FALSE	FALSE	TRUE
7	ZCWPW1	NP_060454.3	-4.023	3	0	0	2	1	-3.00475	-0.935479	1.00294	0.0156623	FALSE	FALSE	FALSE	FALSE	FALSE	FALSE	FALSE	FALSE	FALSE	FALSE
3	MFN1	NP_284941.2	-4.022	3	0	0	3	0	-4.01175	-0.923832	1.14123	0.00308861	FALSE	FALSE	FALSE	FALSE	FALSE	FALSE	FALSE	FALSE	FALSE	FALSE
17	OMG	NP_002535.3	-4.022	1	0	0	1	0	-1.40225	-0.587784	0.569969	0.0709322	FALSE	FALSE	FALSE	FALSE	FALSE	FALSE	FALSE	FALSE	FALSE	FALSE
8	FAM135B	NP_056996.2	-4.021	3	0	0	2	1	-2.52875	-2.03343	2.46105	0.215908	FALSE	FALSE	FALSE	FALSE	FALSE	FALSE	FALSE	FALSE	FALSE	FALSE
13	COL4A2	NP_001837.2	-4.021	5	0	0	3	2	-4.49275	-2.82123	3.35104	0.08845	FALSE	FALSE	FALSE	FALSE	FALSE	FALSE	TRUE	FALSE	FALSE	TRUE
5	PJA2	NP_055634.3	-4.0205	4	0	0	1	3	-2.54975	-0.855638	0.960599	0.0248843	FALSE	FALSE	FALSE	FALSE	FALSE	FALSE	FALSE	FALSE	FALSE	FALSE
2	PAPOLG	NP_075045.2	-4.0205	1	0	0	1	0	-1.40075	-1.05325	0.8698	0.140085	FALSE	FALSE	FALSE	FALSE	FALSE	FALSE	FALSE	FALSE	FALSE	FALSE
1	RUSC1	NP_001098673.1	-4.02	4	0	0	1	3	-3.377	-1.49592	2.0608	0.042943	FALSE	FALSE	FALSE	FALSE	FALSE	FALSE	FALSE	FALSE	FALSE	FALSE
6	ACAT2	NP_001290182.1	-4.02	1	0	0	1	0	-1.40025	-0.453904	0.601889	0.0526666	FALSE	FALSE	FALSE	FALSE	FALSE	FALSE	FALSE	FALSE	FALSE	FALSE
11	PCNX3	NP_115599.2	-4.0195	7	0	0	6	1	-5.89175	-3.20558	4.21611	0.0415814	FALSE	FALSE	FALSE	FALSE	FALSE	FALSE	FALSE	FALSE	FALSE	FALSE
8	ANK1	NP_000028.3	-4.0195	9	0	0	7	2	-9.56475	-3.31622	3.85424	0.000665426	FALSE	FALSE	FALSE	FALSE	FALSE	FALSE	FALSE	FALSE	FALSE	FALSE
[truncated: 16,395 more rows]
