# Supplementary material for: Deep generative modeling of the human proteome reveals over a hundred novel genes involved in rare genetic disorders
Source: Research Square preprint supplement (doi:10.21203/rs.3.rs-3740259/v1), 2024-01-03
Supplement: Supplementary file 9 [file bd937d9669f5838160309909.xlsx]

## Sheet: Key
Column	Description
chrom	GRCh37 chromosome
gene	Gene symbol
protein	RefSeq stable protein id
%_severe	Percent of possible mutations that are severely pathogenic according to popEVE (<-5.056)
%_moderate	Percent of possible mutations that are moderately pathogenic according to popEVE (<-4.617)
popEVE_min	Minimum popEVE score for all possible mutations
popEVE_mean	Mean popEVE score for all possible mutations
popEVE_max	Max popEVE score for all possible mutations
popEVE_std	Standard deviation of popEVE scores for all possible mutations
popEVE_10%	10th percentile popEVE score for all possible mutations
popEVE_median	50th percentile popEVE score for all possible mutations
popEVE_90%	90th percentile popEVE score for all possible mutations
autosomal_dominant	Genes with autosomal dominant inheritance patterns (Bleckhman 2008, Berg 2013)
autosomal_recessive	Genes with autosomal recessive inheritance patterns (Bleckhman 2008, Berg 2013)
haploinsufficient	ClinGen Level 3 Dosage Haploinsufficient genes as of 2018 (Rehm 2015)
homozygous_lof_tolerant	Genes with 2+ different LoF variants homozygous in ExAC (Lek 2016)
acmg_actionable	ACMG actionable genes (Kalia 2017)
cancer_risk	Hereditary cancer predisposition risk panel (University of Washington)
gwas_catalog	Genes closest to significant hits in GWAS catalog as of 2018 (MacArthur 2017)
ukbb_flag	Fails to get 90% coverage of gene in UKBB individuals
pathogenic_flag	popEVE model 90th percentile is an outlier, model has too many pathogenic variants
constraint_flag	Gene fails DeNovoWEST mutation rate background constraint check
ddg2p	Gene is in DDG2P database, known developmental disorder gene
dnw	Gene is significant in DeNovoWEST analysis
dnw_missense	Gene is significant in DeNovoWEST analysis with missense variants only
dev_disorder_known	Gene is known either in DDG2P or labels from the three metacohort centers

## Sheet: SuppTable01
chrom	gene	protein	%_severe	%_moderate	popEVE_min	popEVE_mean	popEVE_max	popEVE_std	popEVE_10%	popEVE_median	popEVE_90%	autosomal_dominant	autosomal_recessive	haploinsufficient	homozygous_lof_tolerant	acmg_actionable	cancer_risk	gwas_catalog	ukbb_flag	pathogenic_flag	constraint_flag	ddg2p	dnw	dnw_missense	dev_disorder_known
X	MAOA	NP_000231.1	0.412515	0.129474	-7.15	-4.82771	-2.601	1.0638	-6.337	-4.753	-3.408	FALSE	FALSE	FALSE	FALSE	FALSE	FALSE	FALSE	FALSE	FALSE	FALSE	TRUE	FALSE	FALSE	TRUE
10	RBP4	NP_006735.2	0	0	-4.3545	-3.65831	-1.815	0.420009	-4.13745	-3.72975	-3.0725	TRUE	FALSE	FALSE	FALSE	FALSE	FALSE	FALSE	FALSE	FALSE	FALSE	FALSE	FALSE	FALSE	FALSE
18	DLGAP1	NP_004737.2	0.00796791	0.0546371	-5.2515	-3.6012	-1.6665	0.557549	-4.4385	-3.4905	-2.973	FALSE	FALSE	FALSE	FALSE	FALSE	FALSE	TRUE	FALSE	FALSE	FALSE	FALSE	FALSE	FALSE	FALSE
17	CALCOCO2	NP_001248320.1	0	0.00146941	-4.7685	-3.65535	-2.5135	0.354259	-4.163	-3.621	-3.22425	FALSE	FALSE	FALSE	FALSE	FALSE	FALSE	FALSE	FALSE	FALSE	FALSE	FALSE	FALSE	FALSE	FALSE
5	OR2Y1	NP_001001657.1	0.0105958	0.0585374	-5.729	-3.42331	-2.2875	0.68943	-4.446	-3.319	-2.5853	FALSE	FALSE	FALSE	FALSE	FALSE	FALSE	FALSE	FALSE	FALSE	TRUE	FALSE	FALSE	FALSE	FALSE
19	SCN1B	NP_001028.1	0	0	-4.5475	-3.56574	-2.516	0.387387	-4.096	-3.5455	-3.062	TRUE	FALSE	FALSE	FALSE	FALSE	FALSE	FALSE	FALSE	FALSE	FALSE	TRUE	FALSE	FALSE	TRUE
19	ZNF428	NP_872304.2	0	0	-3.895	-3.31921	-2.842	0.1971	-3.595	-3.2895	-3.0875	FALSE	FALSE	FALSE	FALSE	FALSE	FALSE	FALSE	FALSE	FALSE	FALSE	FALSE	FALSE	FALSE	FALSE
10	PCGF6	NP_001011663.1	0	0.0254971	-4.8995	-3.85419	-2.104	0.43395	-4.4188	-3.8635	-3.2663	FALSE	FALSE	FALSE	FALSE	FALSE	FALSE	FALSE	FALSE	FALSE	FALSE	FALSE	FALSE	FALSE	FALSE
15	MAN2C1	NP_001243423.1	0	0.00109867	-4.654	-3.42226	-2.463	0.469388	-4.1235	-3.3285	-2.87	FALSE	FALSE	FALSE	FALSE	FALSE	FALSE	FALSE	FALSE	FALSE	FALSE	TRUE	FALSE	FALSE	TRUE
11	ALG8	NP_076984.2	0	0	-4.3675	-3.65932	-2.057	0.395141	-4.13155	-3.7145	-3.1105	FALSE	TRUE	FALSE	FALSE	FALSE	FALSE	FALSE	FALSE	FALSE	FALSE	TRUE	FALSE	FALSE	TRUE
10	HELLS	NP_060533.2	0.21325	0.11361	-6.4995	-4.25998	-2.896	0.839365	-5.556	-4.075	-3.287	FALSE	FALSE	FALSE	FALSE	FALSE	FALSE	TRUE	FALSE	FALSE	FALSE	FALSE	FALSE	FALSE	FALSE
11	PSMD13	NP_787128.2	0	0.029004	-4.9395	-3.58778	-2.629	0.556409	-4.4033	-3.53325	-2.862	FALSE	FALSE	FALSE	FALSE	FALSE	FALSE	FALSE	FALSE	FALSE	FALSE	FALSE	FALSE	FALSE	FALSE
13	POMP	NP_057016.1	0	0	-4.3795	-3.64002	-2.129	0.276291	-3.982	-3.648	-3.2875	FALSE	TRUE	FALSE	FALSE	FALSE	FALSE	TRUE	FALSE	FALSE	FALSE	TRUE	FALSE	FALSE	TRUE
14	FERMT2	NP_001128471.1	0.0990388	0.114639	-6.481	-3.91633	-1.5105	0.814162	-5.0519	-3.83475	-2.8985	FALSE	FALSE	FALSE	FALSE	FALSE	FALSE	TRUE	FALSE	FALSE	FALSE	FALSE	FALSE	FALSE	FALSE
14	PPP4R3A	NP_001271209.1	0.346275	0.0935748	-7.6095	-4.56142	-2.0745	1.23012	-6.41355	-4.341	-3.121	FALSE	FALSE	FALSE	FALSE	FALSE	FALSE	FALSE	FALSE	FALSE	FALSE	FALSE	FALSE	FALSE	FALSE
9	BSPRY	NP_001304873.1	0	0	-3.502	-3.13643	-2.357	0.154835	-3.3233	-3.1485	-2.9307	FALSE	FALSE	FALSE	FALSE	FALSE	FALSE	TRUE	FALSE	FALSE	FALSE	FALSE	FALSE	FALSE	FALSE
4	STATH	NP_003145.1	0	0	-4.19	-3.57629	-2.5685	0.267839	-3.9188	-3.5965	-3.2239	FALSE	FALSE	FALSE	FALSE	FALSE	FALSE	FALSE	FALSE	FALSE	FALSE	FALSE	FALSE	FALSE	FALSE
17	SHBG	NP_001031.2	0	0.000419933	-4.678	-3.48604	-1.761	0.409403	-4.02585	-3.475	-2.9845	FALSE	FALSE	FALSE	FALSE	FALSE	FALSE	TRUE	FALSE	FALSE	FALSE	FALSE	FALSE	FALSE	FALSE
5	KIAA0825	NP_775936.1	0	0.00114062	-4.709	-3.58346	-2.1035	0.306931	-3.946	-3.6075	-3.1851	FALSE	FALSE	FALSE	FALSE	FALSE	FALSE	FALSE	FALSE	FALSE	FALSE	FALSE	FALSE	FALSE	FALSE
22	TOMM22	NP_064628.1	0	0.0120428	-4.7775	-3.60146	-2.054	0.57235	-4.39595	-3.586	-2.8173	FALSE	FALSE	FALSE	FALSE	FALSE	FALSE	FALSE	FALSE	FALSE	FALSE	FALSE	FALSE	FALSE	FALSE
14	CDCA4	NP_060425.2	0.000877193	0.0504386	-5.1415	-3.4322	-1.9295	0.620537	-4.3556	-3.345	-2.69595	FALSE	FALSE	FALSE	FALSE	FALSE	FALSE	FALSE	FALSE	FALSE	FALSE	FALSE	FALSE	FALSE	FALSE
7	AP1S1	NP_001274.1	0	0.0205479	-4.8985	-3.88979	-2.0135	0.453754	-4.4241	-3.948	-3.2568	FALSE	FALSE	FALSE	FALSE	FALSE	FALSE	FALSE	FALSE	FALSE	FALSE	FALSE	FALSE	FALSE	FALSE
1	TAGLN2	NP_001264153.1	0	0.00345125	-4.724	-3.61775	-2.7075	0.403206	-4.1835	-3.5985	-3.0893	FALSE	FALSE	FALSE	FALSE	FALSE	FALSE	TRUE	FALSE	FALSE	FALSE	FALSE	FALSE	FALSE	FALSE
1	ADAM30	NP_068566.2	0	0	-4.092	-3.47984	-2.208	0.333107	-3.94	-3.47625	-3.0465	FALSE	FALSE	FALSE	FALSE	FALSE	FALSE	TRUE	FALSE	FALSE	TRUE	FALSE	FALSE	FALSE	FALSE
X	TAFAZZIN	NP_000107.1	0.103002	0.229441	-5.5435	-4.36628	-3.515	0.491441	-5.06235	-4.3355	-3.717	FALSE	FALSE	FALSE	FALSE	FALSE	FALSE	FALSE	FALSE	FALSE	FALSE	TRUE	FALSE	FALSE	TRUE
3	STXBP5L	NP_055795.1	0.000934714	0.039977	-5.1755	-3.73212	-1.9335	0.526354	-4.41165	-3.7615	-3.022	FALSE	FALSE	FALSE	FALSE	FALSE	FALSE	FALSE	FALSE	FALSE	FALSE	FALSE	FALSE	FALSE	FALSE
17	WNT3	NP_110380.1	0.126282	0.164453	-5.5405	-4.1774	-2.577	0.659297	-5.1242	-4.131	-3.328	FALSE	TRUE	FALSE	FALSE	FALSE	FALSE	TRUE	FALSE	FALSE	FALSE	TRUE	FALSE	FALSE	TRUE
14	SLC10A1	NP_003040.1	0	0	-4	-3.28272	-2.03	0.343077	-3.739	-3.291	-2.8265	FALSE	FALSE	FALSE	FALSE	FALSE	FALSE	FALSE	FALSE	FALSE	TRUE	FALSE	FALSE	FALSE	FALSE
5	PFDN1	NP_002613.2	0.0463872	0.214095	-5.8225	-3.93194	-1.308	0.840317	-4.9295	-4.0575	-2.7118	FALSE	FALSE	FALSE	FALSE	FALSE	FALSE	TRUE	FALSE	FALSE	FALSE	FALSE	FALSE	FALSE	FALSE
X	SH2D1A	NP_002342.1	0.246646	0.23323	-5.956	-4.55216	-2.4045	0.644927	-5.40165	-4.586	-3.6712	FALSE	FALSE	TRUE	FALSE	FALSE	FALSE	FALSE	TRUE	FALSE	FALSE	FALSE	FALSE	FALSE	FALSE
7	CCDC126	NP_620126.2	0	0	-4.5485	-3.5647	-2.379	0.308523	-3.9944	-3.5535	-3.1833	FALSE	FALSE	FALSE	FALSE	FALSE	FALSE	FALSE	FALSE	FALSE	FALSE	FALSE	FALSE	FALSE	FALSE
7	EPO	NP_000790.2	0.00121692	0.0392455	-5.43	-3.67055	-2.527	0.471475	-4.3582	-3.6045	-3.1243	FALSE	FALSE	FALSE	FALSE	FALSE	FALSE	FALSE	FALSE	FALSE	FALSE	FALSE	FALSE	FALSE	FALSE
16	RRN3	NP_060897.3	0.00649886	0.0176659	-5.377	-3.39565	-2.4115	0.447311	-3.9765	-3.314	-2.922	FALSE	FALSE	FALSE	FALSE	FALSE	FALSE	FALSE	TRUE	FALSE	FALSE	FALSE	FALSE	FALSE	FALSE
20	PARD6B	NP_115910.1	0.0206025	0.0947022	-5.547	-3.8414	-2.438	0.61048	-4.66625	-3.824	-3.0635	FALSE	FALSE	FALSE	FALSE	FALSE	FALSE	FALSE	FALSE	FALSE	FALSE	FALSE	FALSE	FALSE	FALSE
12	MYL6B	NP_002466.1	0	0	-4.6025	-3.54028	-1.789	0.462465	-4.15425	-3.5315	-2.9905	FALSE	FALSE	FALSE	FALSE	FALSE	FALSE	FALSE	FALSE	FALSE	FALSE	FALSE	FALSE	FALSE	FALSE
2	CRYGB	NP_005201.2	0	0	-4.057	-3.2376	-2.089	0.329223	-3.7221	-3.19825	-2.84635	FALSE	FALSE	FALSE	FALSE	FALSE	FALSE	FALSE	FALSE	FALSE	FALSE	FALSE	FALSE	FALSE	FALSE
4	ODAPH	NP_848592.2	0	0	-4.0465	-3.35732	-1.6055	0.226501	-3.56305	-3.4045	-3.0689	FALSE	FALSE	FALSE	FALSE	FALSE	FALSE	FALSE	FALSE	FALSE	FALSE	TRUE	FALSE	FALSE	TRUE
19	SIGLEC8	NP_055257.2	0.00498287	0.0755216	-5.2575	-3.56644	-1.763	0.70427	-4.5565	-3.52025	-2.6785	FALSE	FALSE	FALSE	FALSE	FALSE	FALSE	FALSE	FALSE	FALSE	FALSE	FALSE	FALSE	FALSE	FALSE
5	TNFAIP8	NP_001071122.1	0	0.0235835	-4.8465	-3.61179	-2.3775	0.496814	-4.2987	-3.5875	-2.9815	FALSE	FALSE	FALSE	FALSE	FALSE	FALSE	TRUE	FALSE	FALSE	FALSE	FALSE	FALSE	FALSE	FALSE
14	OR11H4	NP_001004479.2	0.0044574	0.0385736	-5.354	-3.28277	-2.5	0.651345	-4.281	-3.1275	-2.57	FALSE	FALSE	FALSE	FALSE	FALSE	FALSE	FALSE	FALSE	FALSE	FALSE	FALSE	FALSE	FALSE	FALSE
21	CFAP298-TCP10L	NP_001337267.1	0	0	-4.2735	-3.36327	-2.4465	0.255876	-3.692	-3.365	-3.0345	FALSE	FALSE	FALSE	FALSE	FALSE	FALSE	FALSE	FALSE	FALSE	FALSE	FALSE	FALSE	FALSE	FALSE
X	EIF2S3	NP_001406.1	0.779928	0.0803664	-7.5385	-5.97378	-2.4715	1.09327	-7.2234	-6.2165	-4.32155	FALSE	FALSE	FALSE	FALSE	FALSE	FALSE	TRUE	FALSE	FALSE	FALSE	TRUE	FALSE	FALSE	TRUE
13	SLC15A1	NP_005064.1	0.00133145	0.0302318	-5.252	-3.48304	-2.0525	0.505827	-4.2645	-3.3285	-2.9585	FALSE	FALSE	FALSE	FALSE	FALSE	FALSE	TRUE	FALSE	FALSE	FALSE	FALSE	FALSE	FALSE	FALSE
14	OR11G2	NP_001005503.2	0.0859184	0.0672708	-6.4605	-3.58669	-2.256	0.846221	-4.95165	-3.25475	-2.8145	FALSE	FALSE	FALSE	FALSE	FALSE	FALSE	FALSE	FALSE	FALSE	FALSE	FALSE	FALSE	FALSE	FALSE
6	CEP162	NP_055710.2	0	0	-4.335	-3.51893	-1.9215	0.332317	-4.0015	-3.488	-3.129	FALSE	FALSE	FALSE	FALSE	FALSE	FALSE	FALSE	FALSE	FALSE	FALSE	FALSE	FALSE	FALSE	FALSE
6	SAPCD1	NP_001034740.1	0.00154799	0.0263158	-5.107	-3.55061	-1.9035	0.469433	-4.15625	-3.5205	-2.9893	FALSE	FALSE	FALSE	FALSE	FALSE	FALSE	FALSE	FALSE	FALSE	FALSE	FALSE	FALSE	FALSE	FALSE
6	ERMARD	NP_060811.1	0	0	-4.501	-3.44177	-2.1465	0.352797	-3.879	-3.4505	-2.978	FALSE	FALSE	FALSE	FALSE	FALSE	FALSE	FALSE	FALSE	FALSE	FALSE	TRUE	FALSE	FALSE	TRUE
8	RBPMS	NP_001008712.1	0.243687	0.132948	-6.147	-4.2792	-2.3835	0.898216	-5.515	-4.263	-3.0845	FALSE	FALSE	FALSE	FALSE	FALSE	FALSE	TRUE	FALSE	FALSE	FALSE	FALSE	FALSE	FALSE	FALSE
3	XCR1	NP_001019815.1	0.00247262	0.0648181	-5.1845	-3.69606	-2.136	0.556029	-4.50095	-3.62325	-3.02105	FALSE	FALSE	FALSE	FALSE	FALSE	FALSE	FALSE	FALSE	FALSE	FALSE	FALSE	FALSE	FALSE	FALSE
8	SLC30A8	NP_776250.2	0.00556853	0.062152	-5.4025	-3.65095	-2.6265	0.587907	-4.4982	-3.5455	-2.9515	FALSE	FALSE	FALSE	FALSE	FALSE	FALSE	TRUE	FALSE	FALSE	FALSE	FALSE	FALSE	FALSE	FALSE
11	ZPR1	NP_003895.1	0.00110674	0.0245942	-5.3935	-3.53879	-2.08	0.54895	-4.27	-3.516	-2.82805	FALSE	FALSE	FALSE	FALSE	FALSE	FALSE	TRUE	FALSE	FALSE	FALSE	FALSE	FALSE	FALSE	FALSE
18	PSMG2	NP_064617.2	0	0	-4.218	-3.48348	-2.4645	0.279115	-3.8935	-3.4465	-3.1444	FALSE	FALSE	FALSE	FALSE	FALSE	FALSE	FALSE	FALSE	FALSE	FALSE	FALSE	FALSE	FALSE	FALSE
4	DRD5	NP_000789.1	0.00182633	0.0224141	-5.4375	-3.2985	-0.707	0.548839	-4.1614	-3.0905	-2.7891	TRUE	FALSE	FALSE	FALSE	FALSE	FALSE	FALSE	FALSE	FALSE	FALSE	FALSE	FALSE	FALSE	FALSE
19	LRRC4B	NP_001073926.1	0.108328	0.117086	-6.175	-4.01117	-2.41	0.752694	-5.0936	-3.96	-3.0739	FALSE	FALSE	FALSE	FALSE	FALSE	FALSE	FALSE	FALSE	FALSE	FALSE	FALSE	FALSE	FALSE	FALSE
11	SMPD1	NP_000534.3	0	0	-4.3075	-3.34156	-2.097	0.405078	-3.9056	-3.319	-2.8189	FALSE	TRUE	FALSE	FALSE	FALSE	FALSE	FALSE	FALSE	FALSE	FALSE	TRUE	FALSE	FALSE	TRUE
2	KLHL29	NP_443152.1	0.00037527	0.0425931	-5.297	-3.76718	-1.9525	0.503366	-4.4411	-3.752	-3.13	FALSE	FALSE	FALSE	FALSE	FALSE	FALSE	TRUE	FALSE	FALSE	FALSE	FALSE	FALSE	FALSE	FALSE
8	BLK	NP_001706.2	0	0	-4.2015	-3.11642	-1.846	0.394008	-3.684	-3.08075	-2.625	TRUE	FALSE	FALSE	FALSE	FALSE	FALSE	TRUE	FALSE	FALSE	FALSE	FALSE	FALSE	FALSE	FALSE
6	GPANK1	NP_001186167.1	0	0	-3.7845	-3.26347	-2.32	0.222843	-3.5705	-3.259	-2.9845	FALSE	FALSE	FALSE	FALSE	FALSE	FALSE	TRUE	FALSE	FALSE	FALSE	FALSE	FALSE	FALSE	FALSE
19	ZNF792	NP_787068.3	0.000286821	0.0636742	-5.057	-3.59621	-2.789	0.514435	-4.407	-3.41	-3.1035	FALSE	FALSE	FALSE	FALSE	FALSE	FALSE	TRUE	FALSE	FALSE	FALSE	FALSE	FALSE	FALSE	FALSE
11	NXPE1	NP_689528.2	0	0	-3.9315	-3.3716	-2.0665	0.331436	-3.7385	-3.4455	-2.867	FALSE	FALSE	FALSE	FALSE	FALSE	FALSE	FALSE	FALSE	FALSE	FALSE	FALSE	FALSE	FALSE	FALSE
6	SLC22A23	NP_056297.1	0.0363272	0.113272	-5.236	-3.76621	-1.9365	0.661396	-4.80595	-3.6035	-3.04	FALSE	FALSE	FALSE	FALSE	FALSE	FALSE	TRUE	FALSE	FALSE	FALSE	FALSE	FALSE	FALSE	FALSE
10	ASB13	NP_078977.2	0	0	-4.127	-3.21236	-1.489	0.411665	-3.763	-3.2015	-2.684	FALSE	FALSE	FALSE	FALSE	FALSE	FALSE	FALSE	FALSE	FALSE	FALSE	FALSE	FALSE	FALSE	FALSE
19	C5AR1	NP_001727.2	0	0.0139367	-4.8045	-3.45098	-2.1465	0.530944	-4.2347	-3.364	-2.81	FALSE	FALSE	FALSE	FALSE	FALSE	FALSE	FALSE	FALSE	FALSE	FALSE	FALSE	FALSE	FALSE	FALSE
2	RNF144A	NP_055561.2	0.114686	0.107561	-6.392	-3.85538	-0.539	0.923728	-5.1305	-3.7665	-2.706	FALSE	FALSE	FALSE	FALSE	FALSE	FALSE	FALSE	FALSE	FALSE	FALSE	FALSE	FALSE	FALSE	FALSE
17	RTN4RL1	NP_848663.1	0.00366903	0.0816043	-5.1075	-3.53291	-2.43	0.624216	-4.55385	-3.314	-2.90065	FALSE	FALSE	FALSE	FALSE	FALSE	FALSE	FALSE	FALSE	FALSE	FALSE	FALSE	FALSE	FALSE	FALSE
4	MTTP	NP_000244.2	0	0	-4.4245	-3.61406	-1.855	0.391085	-4.144	-3.622	-3.104	FALSE	TRUE	FALSE	FALSE	FALSE	FALSE	FALSE	FALSE	FALSE	FALSE	FALSE	FALSE	FALSE	FALSE
9	NTNG2	NP_115925.2	0.066058	0.0946563	-5.651	-3.81328	-2.056	0.724175	-4.861	-3.716	-2.93235	FALSE	FALSE	FALSE	FALSE	FALSE	FALSE	TRUE	FALSE	FALSE	FALSE	TRUE	FALSE	FALSE	TRUE
5	BASP1	NP_001258535.1	0.0507767	0.0612103	-5.6545	-3.36373	-1.989	0.803804	-4.707	-3.049	-2.5675	FALSE	FALSE	FALSE	FALSE	FALSE	FALSE	FALSE	FALSE	FALSE	FALSE	FALSE	FALSE	FALSE	FALSE
20	CD93	NP_036204.2	0	0	-4.307	-3.27415	-1.574	0.452371	-3.9475	-3.21575	-2.72295	FALSE	FALSE	FALSE	FALSE	FALSE	FALSE	TRUE	FALSE	FALSE	FALSE	FALSE	FALSE	FALSE	FALSE
19	CYP2B6	NP_000758.1	0	0	-4.383	-3.25535	-0.943	0.545658	-3.9765	-3.2725	-2.5385	FALSE	FALSE	FALSE	FALSE	FALSE	FALSE	TRUE	FALSE	FALSE	FALSE	FALSE	FALSE	FALSE	FALSE
1	WNT2B	NP_078613.1	0	0.0269006	-4.9025	-3.60968	-2.6245	0.531487	-4.3933	-3.538	-2.949	FALSE	FALSE	FALSE	FALSE	FALSE	FALSE	TRUE	FALSE	FALSE	FALSE	FALSE	FALSE	FALSE	FALSE
21	KRTAP19-8	NP_001092689.1	0	0	-4.3385	-3.32031	-1.624	0.592984	-4.0638	-3.386	-2.4581	FALSE	FALSE	FALSE	FALSE	FALSE	FALSE	FALSE	FALSE	FALSE	FALSE	FALSE	FALSE	FALSE	FALSE
9	CNTNAP3	NP_387504.2	0.000295683	0.199586	-5.078	-4.12657	-1.9855	0.491171	-4.803	-4.112	-3.49965	FALSE	FALSE	FALSE	FALSE	FALSE	FALSE	FALSE	TRUE	FALSE	FALSE	FALSE	FALSE	FALSE	FALSE
22	TEF	NP_003207.1	0	0	-4.581	-3.67208	-2.3415	0.489145	-4.3028	-3.718	-2.991	FALSE	FALSE	FALSE	FALSE	FALSE	FALSE	TRUE	FALSE	FALSE	FALSE	FALSE	FALSE	FALSE	FALSE
12	ALX1	NP_008913.2	0.00995733	0.134661	-5.257	-3.70637	-2.284	0.666001	-4.7308	-3.5655	-2.9462	FALSE	FALSE	FALSE	FALSE	FALSE	FALSE	FALSE	FALSE	FALSE	FALSE	TRUE	FALSE	FALSE	TRUE
2	MAIP1	NP_078796.2	0	0	-4.501	-3.55777	-1.8595	0.403043	-4.07815	-3.5505	-3.04135	FALSE	FALSE	FALSE	FALSE	FALSE	FALSE	TRUE	FALSE	FALSE	FALSE	FALSE	FALSE	FALSE	FALSE
10	MASTL	NP_116233.2	0	0	-4.513	-3.58925	-2.0095	0.311354	-4.045	-3.5595	-3.2281	TRUE	FALSE	FALSE	FALSE	FALSE	FALSE	FALSE	FALSE	FALSE	FALSE	FALSE	FALSE	FALSE	FALSE
13	TGDS	NP_055120.1	0	0	-4.4255	-3.79795	-2.5875	0.354716	-4.256	-3.826	-3.3131	FALSE	FALSE	FALSE	FALSE	FALSE	FALSE	FALSE	FALSE	FALSE	FALSE	TRUE	FALSE	FALSE	TRUE
5	LOC100505841	NP_001182464.2	0	0	-3.351	-3.01177	-2.3445	0.170261	-3.2425	-3.0105	-2.7875	FALSE	FALSE	FALSE	FALSE	FALSE	FALSE	FALSE	FALSE	FALSE	FALSE	FALSE	FALSE	FALSE	FALSE
22	SRRD	NP_001013716.2	0.00831025	0.0166205	-5.5065	-3.33409	-2.2045	0.454252	-3.92385	-3.229	-2.90965	FALSE	FALSE	FALSE	FALSE	FALSE	FALSE	FALSE	FALSE	FALSE	FALSE	FALSE	FALSE	FALSE	FALSE
12	BLOC1S1	NP_001478.2	0	0	-3.9285	-3.3075	-2.3595	0.254594	-3.62745	-3.32475	-2.9746	FALSE	FALSE	FALSE	FALSE	FALSE	FALSE	FALSE	FALSE	FALSE	FALSE	FALSE	FALSE	FALSE	FALSE
X	PQBP1	NP_005701.1	0	0.00887276	-4.887	-3.90721	-2.901	0.291886	-4.3172	-3.881	-3.5435	FALSE	FALSE	TRUE	FALSE	FALSE	FALSE	FALSE	FALSE	FALSE	FALSE	TRUE	FALSE	FALSE	TRUE
19	TARM1	NP_001129158.2	0	0.0156286	-4.7915	-3.46979	-1.3995	0.59122	-4.327	-3.436	-2.7325	FALSE	FALSE	FALSE	FALSE	FALSE	FALSE	FALSE	FALSE	FALSE	FALSE	FALSE	FALSE	FALSE	FALSE
7	ANLN	NP_061155.2	0	0	-4.4805	-3.55371	-2.0865	0.304075	-3.9455	-3.5385	-3.18	FALSE	FALSE	FALSE	FALSE	FALSE	FALSE	FALSE	FALSE	FALSE	FALSE	FALSE	FALSE	FALSE	FALSE
2	YIPF4	NP_115688.1	0	0	-4.137	-3.60218	-1.7385	0.319342	-4.0071	-3.617	-3.209	FALSE	FALSE	FALSE	FALSE	FALSE	FALSE	TRUE	FALSE	FALSE	FALSE	FALSE	FALSE	FALSE	FALSE
11	MS4A2	NP_000130.1	0	0	-4.354	-3.60798	-1.793	0.455922	-4.16625	-3.65075	-2.99775	FALSE	FALSE	FALSE	FALSE	FALSE	FALSE	TRUE	FALSE	FALSE	FALSE	FALSE	FALSE	FALSE	FALSE
1	C1orf127	NP_001164225.1	0.0159512	0.0366804	-5.505	-3.43424	-2.983	0.543422	-4.2667	-3.195	-2.992	FALSE	FALSE	FALSE	TRUE	FALSE	FALSE	TRUE	FALSE	FALSE	FALSE	FALSE	FALSE	FALSE	FALSE
12	SLC6A15	NP_877499.1	0.00159222	0.0978328	-5.162	-3.8571	-2.001	0.594922	-4.616	-3.904	-3.0352	FALSE	FALSE	FALSE	FALSE	FALSE	FALSE	TRUE	FALSE	FALSE	FALSE	FALSE	FALSE	FALSE	FALSE
7	CUL1	NP_003583.2	0.386795	0.160896	-6.6815	-4.7825	-2.8425	0.855216	-5.9905	-4.747	-3.6515	FALSE	FALSE	FALSE	FALSE	FALSE	FALSE	TRUE	FALSE	FALSE	FALSE	FALSE	FALSE	FALSE	FALSE
1	HAX1	NP_006109.2	0	0	-3.903	-3.24794	-2.593	0.186369	-3.49565	-3.2335	-3.02885	FALSE	TRUE	FALSE	FALSE	FALSE	FALSE	FALSE	FALSE	FALSE	FALSE	TRUE	FALSE	FALSE	TRUE
15	CCDC33	NP_079331.3	0	0	-4.0075	-3.4163	-2.084	0.294544	-3.814	-3.4205	-3.038	FALSE	FALSE	FALSE	FALSE	FALSE	FALSE	TRUE	FALSE	FALSE	FALSE	FALSE	FALSE	FALSE	FALSE
8	CCN4	NP_003873.1	0	0	-3.726	-3.25898	-2.6295	0.208011	-3.553	-3.2485	-2.9908	FALSE	FALSE	FALSE	FALSE	FALSE	FALSE	FALSE	FALSE	FALSE	FALSE	FALSE	FALSE	FALSE	FALSE
20	TNFRSF6B	NP_003814.1	0	0	-3.742	-2.98682	-1.6235	0.378501	-3.5129	-2.9855	-2.4925	FALSE	FALSE	FALSE	FALSE	FALSE	FALSE	FALSE	FALSE	FALSE	TRUE	FALSE	FALSE	FALSE	FALSE
1	NPHS2	NP_055440.1	0	0.021098	-4.99	-3.77193	-2.0545	0.469299	-4.387	-3.7795	-3.15785	FALSE	TRUE	FALSE	FALSE	FALSE	FALSE	FALSE	FALSE	FALSE	FALSE	TRUE	FALSE	FALSE	TRUE
15	CTSH	NP_004381.2	0	0	-4.177	-3.48202	-2.5535	0.332798	-3.9242	-3.4935	-3.0235	FALSE	FALSE	FALSE	FALSE	FALSE	FALSE	TRUE	FALSE	FALSE	FALSE	FALSE	FALSE	FALSE	FALSE
21	NRIP1	NP_003480.2	0	0	-4.2535	-3.41902	-2.013	0.287127	-3.8165	-3.3745	-3.1035	FALSE	FALSE	FALSE	FALSE	FALSE	FALSE	TRUE	FALSE	FALSE	FALSE	FALSE	FALSE	FALSE	FALSE
1	EFHD2	NP_077305.2	0	0.00503919	-4.7565	-3.67586	-2.812	0.418899	-4.2589	-3.6505	-3.1246	FALSE	FALSE	FALSE	FALSE	FALSE	FALSE	TRUE	FALSE	FALSE	FALSE	FALSE	FALSE	FALSE	FALSE
19	ZNF432	NP_001309213.1	0.00648771	0.0366556	-5.448	-3.48724	-2.421	0.507816	-4.254	-3.324	-2.988	FALSE	FALSE	FALSE	FALSE	FALSE	FALSE	FALSE	FALSE	FALSE	FALSE	FALSE	FALSE	FALSE	FALSE
1	BOLA1	NP_001307954.1	0	0	-3.4955	-3.39955	-3.2705	0.0417091	-3.4545	-3.4015	-3.34215	FALSE	FALSE	FALSE	FALSE	FALSE	FALSE	FALSE	FALSE	FALSE	FALSE	FALSE	FALSE	FALSE	FALSE
9	PTGES	NP_004869.1	0	0.0033358	-4.7565	-3.38355	-1.8235	0.570235	-4.14665	-3.37725	-2.6095	FALSE	FALSE	FALSE	FALSE	FALSE	FALSE	TRUE	FALSE	FALSE	FALSE	FALSE	FALSE	FALSE	FALSE
6	DDR1	NP_054700.2	0.00119211	0.0368958	-5.132	-3.50985	-2.6435	0.476895	-4.257	-3.3345	-3.063	FALSE	FALSE	FALSE	FALSE	FALSE	FALSE	TRUE	FALSE	FALSE	FALSE	FALSE	FALSE	FALSE	FALSE
2	CDC42EP3	NP_001257365.1	0	0	-3.6605	-3.2603	-2.7805	0.185019	-3.5654	-3.2165	-3.0505	FALSE	FALSE	FALSE	FALSE	FALSE	FALSE	FALSE	FALSE	FALSE	FALSE	FALSE	FALSE	FALSE	FALSE
X	ESX1	NP_703149.1	0.114035	0.0424837	-6.096	-3.60364	-0.63	0.884176	-5.19705	-3.274	-2.876	FALSE	FALSE	FALSE	FALSE	FALSE	FALSE	FALSE	FALSE	FALSE	FALSE	FALSE	FALSE	FALSE	FALSE
16	KRBOX5	NP_001124385.1	0	0.0544465	-4.899	-3.54696	-1.559	0.622246	-4.45955	-3.43025	-2.81845	FALSE	FALSE	FALSE	FALSE	FALSE	FALSE	FALSE	FALSE	FALSE	FALSE	FALSE	FALSE	FALSE	FALSE
7	ATXN7L1	NP_065776.1	0.03086	0.0627374	-5.461	-3.66798	-1.336	0.651004	-4.5705	-3.64825	-2.8715	FALSE	FALSE	FALSE	FALSE	FALSE	FALSE	FALSE	FALSE	FALSE	FALSE	FALSE	FALSE	FALSE	FALSE
11	MED17	NP_004259.3	0	0.000251425	-4.653	-3.6646	-2.387	0.315191	-4.06195	-3.672	-3.25305	FALSE	TRUE	FALSE	FALSE	FALSE	FALSE	FALSE	FALSE	FALSE	FALSE	TRUE	FALSE	FALSE	TRUE
15	AQR	NP_055506.1	0	0.0600311	-5.0495	-3.87125	-3.0105	0.361329	-4.3694	-3.834	-3.4535	FALSE	FALSE	FALSE	FALSE	FALSE	FALSE	FALSE	FALSE	FALSE	FALSE	FALSE	FALSE	FALSE	FALSE
1	KNCN	NP_001309184.1	0	0	-3.95	-3.22399	-2.1885	0.248897	-3.5532	-3.2125	-2.9264	FALSE	FALSE	FALSE	FALSE	FALSE	FALSE	FALSE	FALSE	FALSE	FALSE	FALSE	FALSE	FALSE	FALSE
1	IPO13	NP_055467.3	0.125454	0.129314	-6.3225	-4.08928	-2.4485	0.751363	-5.163	-4.0255	-3.1359	FALSE	FALSE	FALSE	FALSE	FALSE	FALSE	FALSE	FALSE	FALSE	FALSE	FALSE	FALSE	FALSE	FALSE
10	FBH1	NP_116196.3	0	0.00589925	-4.6745	-3.67388	-2.337	0.447828	-4.39035	-3.60625	-3.1375	FALSE	FALSE	FALSE	FALSE	FALSE	FALSE	FALSE	FALSE	FALSE	FALSE	FALSE	FALSE	FALSE	FALSE
11	MPZL2	NP_005788.1	0	0	-3.547	-3.261	-2.7575	0.156413	-3.4755	-3.2585	-3.06	FALSE	TRUE	FALSE	FALSE	FALSE	FALSE	TRUE	FALSE	FALSE	FALSE	FALSE	FALSE	FALSE	FALSE
3	ARHGEF26	NP_001238891.1	0	0.0150972	-4.9055	-3.50411	-1.42	0.498546	-4.218	-3.428	-2.9304	FALSE	FALSE	FALSE	FALSE	FALSE	FALSE	TRUE	FALSE	FALSE	FALSE	FALSE	FALSE	FALSE	FALSE
7	BCL7B	NP_001698.2	0	0.0852522	-4.9535	-3.76346	-2.2905	0.537991	-4.58595	-3.696	-3.09535	FALSE	FALSE	FALSE	FALSE	FALSE	FALSE	TRUE	FALSE	FALSE	FALSE	FALSE	FALSE	FALSE	FALSE
18	CEP76	NP_079175.2	0	0	-4.4325	-3.55149	-1.71	0.390223	-4.0829	-3.5495	-3.057	FALSE	FALSE	FALSE	FALSE	FALSE	FALSE	FALSE	FALSE	FALSE	FALSE	FALSE	FALSE	FALSE	FALSE
16	RGS11	NP_899180.1	0.00293076	0.0112346	-5.567	-3.25485	-1.8395	0.52745	-3.976	-3.181	-2.6404	FALSE	FALSE	FALSE	TRUE	FALSE	FALSE	FALSE	FALSE	FALSE	FALSE	FALSE	FALSE	FALSE	FALSE
12	PRIM1	NP_000937.1	0.0979677	0.109823	-5.8835	-3.94459	-3.144	0.701162	-5.048	-3.761	-3.185	FALSE	FALSE	FALSE	FALSE	FALSE	FALSE	TRUE	FALSE	FALSE	FALSE	TRUE	FALSE	FALSE	TRUE
Y	RPS4Y2	NP_001034656.1	0.0988501	0.189739	-6.342	-4.25462	-2.8395	0.608104	-5.0509	-4.24475	-3.46655	FALSE	FALSE	FALSE	FALSE	FALSE	FALSE	FALSE	TRUE	FALSE	FALSE	FALSE	FALSE	FALSE	FALSE
12	USP15	NP_001239007.1	0.155484	0.111003	-6.1765	-4.11263	-1.973	0.812056	-5.3415	-3.9625	-3.1815	FALSE	FALSE	FALSE	FALSE	FALSE	FALSE	TRUE	FALSE	FALSE	FALSE	FALSE	FALSE	FALSE	FALSE
15	SLC12A6	NP_598408.1	0.0538403	0.100277	-5.775	-3.97251	-2.4125	0.568732	-4.8248	-3.851	-3.3315	FALSE	TRUE	FALSE	FALSE	FALSE	FALSE	FALSE	FALSE	FALSE	FALSE	TRUE	FALSE	FALSE	TRUE
19	GNA11	NP_002058.2	0.0996349	0.135534	-6.092	-3.98823	-2.1555	0.753525	-5.051	-3.918	-3.0395	FALSE	FALSE	FALSE	FALSE	FALSE	FALSE	FALSE	FALSE	FALSE	FALSE	TRUE	FALSE	FALSE	TRUE
17	RANGRF	NP_057576.2	0	0	-4.438	-3.44017	-2.1115	0.347569	-3.8876	-3.4435	-2.99195	FALSE	FALSE	FALSE	FALSE	FALSE	FALSE	FALSE	FALSE	FALSE	FALSE	FALSE	FALSE	FALSE	FALSE
2	OTX1	NP_055377.1	0	0	-4.381	-3.61642	-2.3655	0.423452	-4.2335	-3.591	-3.067	FALSE	FALSE	FALSE	FALSE	FALSE	FALSE	FALSE	FALSE	FALSE	FALSE	FALSE	FALSE	FALSE	FALSE
9	DPP7	NP_037511.2	0	0	-3.831	-3.03193	-1.679	0.354728	-3.5235	-3.021	-2.5745	FALSE	FALSE	FALSE	FALSE	FALSE	FALSE	TRUE	FALSE	FALSE	FALSE	FALSE	FALSE	FALSE	FALSE
19	ZNF446	NP_060378.1	0	0.00015949	-4.6615	-3.2347	-2.08	0.375154	-3.76855	-3.17525	-2.81995	FALSE	FALSE	FALSE	FALSE	FALSE	FALSE	FALSE	FALSE	FALSE	FALSE	FALSE	FALSE	FALSE	FALSE
19	KCTD15	NP_001123466.1	0.0307386	0.0572755	-5.9645	-3.59788	-2.3565	0.67567	-4.55445	-3.5205	-2.7676	FALSE	FALSE	FALSE	FALSE	FALSE	FALSE	TRUE	FALSE	FALSE	FALSE	FALSE	FALSE	FALSE	FALSE
20	B4GALT5	NP_004767.1	0.0249809	0.220824	-5.254	-4.12885	-1.7435	0.603719	-4.87685	-4.182	-3.30365	FALSE	FALSE	FALSE	FALSE	FALSE	FALSE	FALSE	FALSE	FALSE	FALSE	FALSE	FALSE	FALSE	FALSE
14	TDRD9	NP_694591.2	0	0.000146402	-4.631	-3.63111	-2.4965	0.382072	-4.21	-3.563	-3.1795	FALSE	FALSE	FALSE	FALSE	FALSE	FALSE	TRUE	FALSE	FALSE	FALSE	FALSE	FALSE	FALSE	FALSE
17	ANAPC11	NP_001002244.1	0	0	-3.958	-3.42088	-2.7485	0.183069	-3.6685	-3.4115	-3.197	FALSE	FALSE	FALSE	FALSE	FALSE	FALSE	FALSE	FALSE	FALSE	FALSE	FALSE	FALSE	FALSE	FALSE
17	RAC3	NP_005043.1	0.162998	0.154386	-6.294	-4.06717	-1.9665	0.902789	-5.2475	-4.126	-2.7887	FALSE	FALSE	FALSE	FALSE	FALSE	FALSE	FALSE	FALSE	FALSE	TRUE	TRUE	FALSE	FALSE	TRUE
3	ARL13B	NP_001167621.1	0	0	-4.374	-3.54833	-1.7905	0.434218	-4.11065	-3.5785	-2.9585	FALSE	TRUE	FALSE	FALSE	FALSE	FALSE	FALSE	FALSE	FALSE	FALSE	FALSE	FALSE	FALSE	FALSE
5	TSLP	NP_149024.1	0	0	-4.178	-3.44089	-2.2545	0.310505	-3.8174	-3.472	-3.0268	FALSE	FALSE	FALSE	FALSE	FALSE	FALSE	TRUE	FALSE	FALSE	FALSE	FALSE	FALSE	FALSE	FALSE
12	EIF4B	NP_001408.2	0.000104844	0.0608094	-5.1835	-3.74032	-1.4945	0.542646	-4.5	-3.7115	-3.03785	FALSE	FALSE	FALSE	FALSE	FALSE	FALSE	TRUE	FALSE	FALSE	FALSE	FALSE	FALSE	FALSE	FALSE
19	LRRC25	NP_660299.2	0	0.0605956	-5.037	-3.63783	-2.3375	0.515176	-4.363	-3.57475	-3.03225	FALSE	FALSE	FALSE	FALSE	FALSE	FALSE	TRUE	FALSE	FALSE	FALSE	FALSE	FALSE	FALSE	FALSE
2	RETSAT	NP_060220.3	0	0.00796195	-4.733	-3.57161	-2.143	0.469856	-4.2175	-3.5605	-2.9635	FALSE	FALSE	FALSE	TRUE	FALSE	FALSE	FALSE	FALSE	FALSE	FALSE	FALSE	FALSE	FALSE	FALSE
11	HSPB2	NP_001532.1	0	0	-3.4535	-3.15803	-2.53	0.151709	-3.3665	-3.157	-2.9627	FALSE	FALSE	FALSE	FALSE	FALSE	FALSE	FALSE	FALSE	FALSE	FALSE	FALSE	FALSE	FALSE	FALSE
11	C11orf97	NP_001177391.1	0	0	-4.29	-3.25819	-1.788	0.282934	-3.596	-3.2805	-2.9036	FALSE	FALSE	FALSE	FALSE	FALSE	FALSE	FALSE	FALSE	FALSE	FALSE	FALSE	FALSE	FALSE	FALSE
1	ASAP3	NP_060177.2	0	0.0601598	-5.044	-3.67361	-2.265	0.506079	-4.4393	-3.554	-3.128	FALSE	FALSE	FALSE	FALSE	FALSE	FALSE	TRUE	FALSE	FALSE	FALSE	FALSE	FALSE	FALSE	FALSE
21	POFUT2	NP_598368.2	0.000131909	0.0110803	-5.069	-3.47133	-1.415	0.493047	-4.1185	-3.4505	-2.8535	FALSE	FALSE	FALSE	FALSE	FALSE	FALSE	FALSE	FALSE	FALSE	FALSE	FALSE	FALSE	FALSE	FALSE
16	SNAI3	NP_840101.1	0	0	-4.4925	-3.49717	-2.028	0.48143	-4.138	-3.482	-2.886	FALSE	FALSE	FALSE	FALSE	FALSE	FALSE	FALSE	FALSE	FALSE	FALSE	FALSE	FALSE	FALSE	FALSE
1	C1QA	NP_057075.1	0	0	-4.413	-3.56042	-2.2905	0.426669	-4.15225	-3.5305	-3.0145	TRUE	FALSE	FALSE	FALSE	FALSE	FALSE	FALSE	FALSE	FALSE	FALSE	FALSE	FALSE	FALSE	FALSE
19	PSG1	NP_001284702.1	0.000669045	0.0167261	-5.1065	-3.07004	-0.1785	0.739727	-4.04535	-3.0505	-2.138	FALSE	FALSE	FALSE	TRUE	FALSE	FALSE	FALSE	FALSE	FALSE	FALSE	FALSE	FALSE	FALSE	FALSE
2	CHMP3	NP_001180446.1	0	0	-4.4285	-3.75042	-3.1935	0.222148	-4.05325	-3.73	-3.47025	FALSE	FALSE	FALSE	FALSE	FALSE	FALSE	FALSE	FALSE	FALSE	FALSE	FALSE	FALSE	FALSE	FALSE
20	RBM12	NP_001185767.1	0	0.023354	-4.9955	-3.47515	-2.086	0.487376	-4.1989	-3.3755	-2.938	FALSE	FALSE	FALSE	FALSE	FALSE	FALSE	FALSE	FALSE	FALSE	FALSE	FALSE	FALSE	FALSE	FALSE
11	ANKRD42	NP_001287904.1	0	0	-4.6165	-3.57761	-3.1165	0.339766	-4.109	-3.467	-3.2385	FALSE	FALSE	FALSE	FALSE	FALSE	FALSE	FALSE	FALSE	FALSE	FALSE	FALSE	FALSE	FALSE	FALSE
15	IDH2	NP_002159.2	0.00327311	0.0299817	-5.3235	-3.67587	-2.5725	0.498586	-4.3498	-3.653	-3.01485	TRUE	FALSE	FALSE	FALSE	FALSE	FALSE	FALSE	FALSE	FALSE	FALSE	FALSE	FALSE	FALSE	TRUE
11	ACCS	NP_115981.1	0	0.000504859	-4.7345	-3.567	-2.3655	0.392774	-4.1114	-3.5505	-3.0586	FALSE	FALSE	FALSE	FALSE	FALSE	FALSE	TRUE	FALSE	FALSE	FALSE	FALSE	FALSE	FALSE	FALSE
16	NUDT21	NP_008937.1	0.489024	0.290135	-6.0525	-4.99225	-3.533	0.465322	-5.565	-5.0425	-4.332	FALSE	FALSE	FALSE	FALSE	FALSE	FALSE	FALSE	FALSE	FALSE	FALSE	FALSE	FALSE	FALSE	FALSE
19	OR7C1	NP_945182.1	0.068061	0.0756043	-5.8595	-3.69619	-1.6385	0.71489	-4.8461	-3.4425	-3.051	FALSE	FALSE	FALSE	FALSE	FALSE	FALSE	FALSE	FALSE	FALSE	TRUE	FALSE	FALSE	FALSE	FALSE
5	NDUFS4	NP_002486.1	0	0	-4.0785	-3.63241	-2.23	0.285882	-3.9485	-3.69425	-3.22025	FALSE	TRUE	FALSE	FALSE	FALSE	FALSE	TRUE	FALSE	FALSE	FALSE	TRUE	FALSE	FALSE	TRUE
11	PGA5	NP_055039.1	0.0143107	0.176181	-5.19	-4.14203	-2.5605	0.487582	-4.7901	-4.144	-3.4914	FALSE	FALSE	FALSE	FALSE	FALSE	FALSE	FALSE	TRUE	FALSE	FALSE	FALSE	FALSE	FALSE	FALSE
11	STIP1	NP_001269581.1	0.0232399	0.118153	-5.37	-3.88519	-2.284	0.61218	-4.755	-3.854	-3.099	FALSE	FALSE	FALSE	FALSE	FALSE	FALSE	FALSE	FALSE	FALSE	FALSE	FALSE	FALSE	FALSE	FALSE
3	WDR49	NP_001353086.1	0	5.87406e-05	-4.628	-3.55218	-2.017	0.443801	-4.2215	-3.499	-3.0125	FALSE	FALSE	FALSE	FALSE	FALSE	FALSE	TRUE	FALSE	FALSE	FALSE	FALSE	FALSE	FALSE	FALSE
X	SERPINA7	NP_000345.2	0.00070932	0.090793	-5.1175	-3.87194	-1.8095	0.520138	-4.5937	-3.842	-3.2307	FALSE	FALSE	FALSE	FALSE	FALSE	FALSE	FALSE	FALSE	FALSE	FALSE	FALSE	FALSE	FALSE	FALSE
15	TRIP4	NP_057297.2	0	0.00134706	-4.7405	-3.19987	-2.039	0.453575	-3.8235	-3.1385	-2.6545	FALSE	FALSE	FALSE	FALSE	FALSE	FALSE	FALSE	FALSE	FALSE	FALSE	TRUE	FALSE	FALSE	TRUE
11	LRP5	NP_002326.2	0	0	-4.555	-3.43569	-2.4995	0.387514	-4.018	-3.361	-2.9885	TRUE	FALSE	FALSE	FALSE	FALSE	FALSE	TRUE	FALSE	FALSE	FALSE	TRUE	FALSE	FALSE	TRUE
1	PGBD5	NP_001245240.1	0	0.0186427	-4.8035	-3.42694	-1.6015	0.476079	-4.117	-3.339	-2.8995	FALSE	FALSE	FALSE	FALSE	FALSE	FALSE	FALSE	FALSE	FALSE	FALSE	FALSE	FALSE	FALSE	FALSE
19	CATSPERG	NP_067008.3	0	0	-4.2055	-3.48143	-2.355	0.19469	-3.6885	-3.5125	-3.214	FALSE	FALSE	FALSE	FALSE	FALSE	FALSE	TRUE	FALSE	FALSE	FALSE	FALSE	FALSE	FALSE	FALSE
19	GMFG	NP_004868.1	0	0	-4.344	-3.59701	-1.8755	0.376682	-4.0709	-3.62925	-3.099	FALSE	FALSE	FALSE	FALSE	FALSE	FALSE	FALSE	FALSE	FALSE	FALSE	FALSE	FALSE	FALSE	FALSE
2	SMC6	NP_001135758.1	0.0593792	0.060079	-5.6315	-3.79997	-2.8955	0.626056	-4.7385	-3.681	-3.0905	FALSE	FALSE	FALSE	FALSE	FALSE	FALSE	FALSE	FALSE	FALSE	FALSE	FALSE	FALSE	FALSE	FALSE
4	RBM46	NP_659416.1	0.42203	0.139319	-6.714	-4.74873	-2.485	1.03223	-6.1137	-4.819	-3.2273	FALSE	FALSE	FALSE	FALSE	FALSE	FALSE	FALSE	FALSE	FALSE	FALSE	FALSE	FALSE	FALSE	FALSE
3	USP19	NP_001186089.1	8.09717e-05	0.0446154	-5.14	-3.57821	-2.5955	0.434228	-4.3	-3.4505	-3.157	FALSE	FALSE	FALSE	FALSE	FALSE	FALSE	FALSE	FALSE	FALSE	FALSE	FALSE	FALSE	FALSE	FALSE
9	SLC28A3	NP_071410.1	0	0.0253314	-4.925	-3.87512	-2.9105	0.410787	-4.4305	-3.861	-3.341	FALSE	FALSE	FALSE	FALSE	FALSE	FALSE	TRUE	FALSE	FALSE	FALSE	FALSE	FALSE	FALSE	FALSE
10	CCSER2	NP_001271169.1	0	0	-4.1435	-3.40538	-2.2915	0.26858	-3.7815	-3.3865	-3.087	FALSE	FALSE	FALSE	FALSE	FALSE	FALSE	FALSE	FALSE	FALSE	FALSE	FALSE	FALSE	FALSE	FALSE
8	INTS8	NP_060334.2	0	0.0154544	-4.854	-3.71163	-2.5215	0.336437	-4.1575	-3.6745	-3.325	FALSE	FALSE	FALSE	FALSE	FALSE	FALSE	FALSE	FALSE	FALSE	FALSE	FALSE	FALSE	FALSE	FALSE
3	TPRG1	NP_940887.1	0	0	-3.852	-3.50494	-1.7545	0.201238	-3.7786	-3.5055	-3.2475	FALSE	FALSE	FALSE	FALSE	FALSE	FALSE	FALSE	FALSE	FALSE	FALSE	FALSE	FALSE	FALSE	FALSE
6	SKIC2	NP_008860.4	0	0	-3.946	-3.40742	-2.911	0.167846	-3.6595	-3.3725	-3.219	FALSE	FALSE	FALSE	FALSE	FALSE	FALSE	FALSE	FALSE	FALSE	FALSE	TRUE	FALSE	FALSE	TRUE
7	PALS2	NP_057531.2	0.0588885	0.148203	-5.525	-3.93901	-1.85	0.725069	-4.928	-3.9425	-2.9545	FALSE	FALSE	FALSE	FALSE	FALSE	FALSE	FALSE	FALSE	FALSE	FALSE	FALSE	FALSE	FALSE	FALSE
19	ICAM1	NP_000192.2	0	0.00656612	-5.043	-3.43515	-2.374	0.408255	-4.0172	-3.367	-2.9685	FALSE	FALSE	FALSE	FALSE	FALSE	FALSE	TRUE	FALSE	FALSE	FALSE	FALSE	FALSE	FALSE	FALSE
20	MMP24	NP_006681.1	0.00112701	0.0900485	-5.103	-3.77171	-2.726	0.58495	-4.5869	-3.7545	-2.9857	FALSE	FALSE	FALSE	FALSE	FALSE	FALSE	TRUE	FALSE	FALSE	FALSE	FALSE	FALSE	FALSE	FALSE
6	LIN28B	NP_001004317.1	0.0754772	0.140254	-5.8795	-3.95156	-2.965	0.73383	-4.9699	-3.96725	-3.02085	FALSE	FALSE	FALSE	FALSE	FALSE	FALSE	TRUE	FALSE	FALSE	FALSE	FALSE	FALSE	FALSE	FALSE
8	ZNF705D	NP_001034704.2	0.127946	0.127592	-6.251	-4.44484	-1.871	0.527466	-5.2149	-4.3515	-3.906	FALSE	FALSE	FALSE	FALSE	FALSE	FALSE	FALSE	TRUE	FALSE	FALSE	FALSE	FALSE	FALSE	FALSE
7	GIMAP5	NP_060854.2	0	0	-4.5125	-3.59771	-2.5735	0.335793	-4.06815	-3.577	-3.17835	FALSE	FALSE	FALSE	FALSE	FALSE	FALSE	FALSE	FALSE	FALSE	FALSE	FALSE	FALSE	FALSE	FALSE
X	SHROOM4	NP_065768.2	0	0.000744201	-4.6335	-3.8207	-2.291	0.248269	-4.062	-3.859	-3.449	FALSE	FALSE	FALSE	FALSE	FALSE	FALSE	FALSE	FALSE	FALSE	FALSE	FALSE	FALSE	FALSE	FALSE
10	NDUFB8	NP_004995.1	0	0	-3.77	-3.35866	-2.503	0.192051	-3.5875	-3.385	-3.095	FALSE	FALSE	FALSE	FALSE	FALSE	FALSE	FALSE	FALSE	FALSE	FALSE	TRUE	FALSE	FALSE	TRUE
11	TRIM44	NP_060053.2	0	0	-4.3055	-3.39797	-2.516	0.370461	-3.9675	-3.33	-3.018	FALSE	FALSE	FALSE	FALSE	FALSE	FALSE	TRUE	FALSE	FALSE	FALSE	FALSE	FALSE	FALSE	FALSE
1	GSTM3	NP_000840.2	0.0544923	0.0890484	-6.0345	-3.74543	-2.8085	0.726514	-4.81595	-3.62825	-2.8815	FALSE	FALSE	FALSE	FALSE	FALSE	FALSE	FALSE	FALSE	FALSE	FALSE	FALSE	FALSE	FALSE	FALSE
9	PPP6C	NP_001116827.1	0.162296	0.210343	-5.688	-4.28661	-2.851	0.70826	-5.2078	-4.331	-3.2195	FALSE	FALSE	FALSE	FALSE	FALSE	FALSE	FALSE	FALSE	FALSE	FALSE	FALSE	FALSE	FALSE	FALSE
22	DDT	NP_001077861.1	0.473223	0.350877	-5.719	-4.98557	-2.909	0.407154	-5.47375	-5.0305	-4.4605	FALSE	FALSE	FALSE	FALSE	FALSE	FALSE	FALSE	FALSE	FALSE	FALSE	FALSE	FALSE	FALSE	FALSE
14	EIF2B2	NP_055054.1	0.0433065	0.122649	-5.2995	-3.80541	-2.918	0.65552	-4.8622	-3.6235	-3.1105	FALSE	TRUE	FALSE	FALSE	FALSE	FALSE	TRUE	FALSE	FALSE	FALSE	FALSE	FALSE	FALSE	FALSE
1	OR6Y1	NP_001005189.1	0	0.0271702	-5.041	-3.30575	-2.354	0.655025	-4.27795	-3.21675	-2.4915	FALSE	FALSE	FALSE	FALSE	FALSE	FALSE	FALSE	FALSE	FALSE	FALSE	FALSE	FALSE	FALSE	FALSE
1	SDF4	NP_057260.3	0.00286775	0.0531377	-5.33	-3.52775	-1.4715	0.653546	-4.44065	-3.4795	-2.71885	FALSE	FALSE	FALSE	FALSE	FALSE	FALSE	FALSE	FALSE	FALSE	FALSE	FALSE	FALSE	FALSE	FALSE
2	STON1	NP_001185524.1	0	0	-3.826	-3.12414	-1.8235	0.323644	-3.5714	-3.1165	-2.7075	FALSE	FALSE	FALSE	FALSE	FALSE	FALSE	FALSE	FALSE	FALSE	FALSE	FALSE	FALSE	FALSE	FALSE
19	MIA	NP_006524.1	0	0	-3.7145	-3.35052	-2.954	0.156239	-3.5804	-3.3245	-3.1623	FALSE	FALSE	FALSE	FALSE	FALSE	FALSE	TRUE	FALSE	FALSE	FALSE	FALSE	FALSE	FALSE	FALSE
1	H3-4	NP_003484.1	0.228207	0.0666118	-6.8585	-3.54827	-1.246	1.59623	-5.8331	-3.3885	-1.53605	FALSE	FALSE	FALSE	FALSE	FALSE	FALSE	FALSE	FALSE	FALSE	TRUE	TRUE	FALSE	FALSE	TRUE
4	ZNF827	NP_001293144.1	0	0.0368519	-4.9495	-3.68035	-2.191	0.417468	-4.27575	-3.611	-3.216	FALSE	FALSE	FALSE	FALSE	FALSE	FALSE	TRUE	FALSE	FALSE	FALSE	FALSE	FALSE	FALSE	FALSE
17	SRSF1	NP_008855.1	0.657055	0.222844	-6.265	-5.26247	-2.691	0.52466	-5.91775	-5.32475	-4.5491	FALSE	FALSE	FALSE	FALSE	FALSE	FALSE	FALSE	FALSE	FALSE	FALSE	TRUE	FALSE	FALSE	TRUE
8	SOX17	NP_071899.1	0.0018797	0.043956	-5.2015	-3.33193	-2.255	0.58985	-4.3655	-3.1205	-2.777	TRUE	FALSE	FALSE	FALSE	FALSE	FALSE	FALSE	FALSE	FALSE	FALSE	TRUE	FALSE	FALSE	TRUE
1	MFSD4A	NP_857595.3	0	0.0187513	-4.9605	-3.64204	-2.768	0.44674	-4.297	-3.55	-3.12375	FALSE	FALSE	FALSE	FALSE	FALSE	FALSE	FALSE	FALSE	FALSE	FALSE	FALSE	FALSE	FALSE	FALSE
3	C3orf14	NP_001278870.1	0	0	-3.847	-3.3324	-2.301	0.208642	-3.5755	-3.35	-3.058	FALSE	FALSE	FALSE	TRUE	FALSE	FALSE	FALSE	FALSE	FALSE	FALSE	FALSE	FALSE	FALSE	FALSE
X	BRS3	NP_001718.1	0.190491	0.154874	-6.2575	-4.34435	-2.263	0.720383	-5.3745	-4.273	-3.4475	FALSE	FALSE	FALSE	FALSE	FALSE	FALSE	FALSE	FALSE	FALSE	FALSE	FALSE	FALSE	FALSE	FALSE
5	RBM22	NP_060517.1	0.237549	0.205813	-6.7135	-4.49638	-2.6705	0.748382	-5.477	-4.493	-3.49	FALSE	FALSE	FALSE	FALSE	FALSE	FALSE	FALSE	FALSE	FALSE	FALSE	FALSE	FALSE	FALSE	FALSE
9	ARHGEF39	NP_116207.2	0	0	-4.482	-3.47203	-2.709	0.425095	-4.153	-3.3755	-2.997	FALSE	FALSE	FALSE	FALSE	FALSE	FALSE	FALSE	FALSE	FALSE	FALSE	FALSE	FALSE	FALSE	FALSE
6	TFAP2A	NP_001358995.1	0.247932	0.0820046	-7.845	-4.17187	-2.734	1.17477	-5.942	-3.845	-2.934	TRUE	FALSE	FALSE	FALSE	FALSE	FALSE	FALSE	FALSE	FALSE	FALSE	TRUE	FALSE	FALSE	TRUE
11	SCYL1	NP_065731.3	0	0.00661451	-4.785	-3.47292	-2.4485	0.46771	-4.1675	-3.38425	-2.9335	FALSE	FALSE	FALSE	FALSE	FALSE	FALSE	FALSE	FALSE	FALSE	FALSE	TRUE	FALSE	FALSE	TRUE
12	ARL6IP4	NP_057722.4	0	0	-3.3655	-3.13703	-2.47	0.105355	-3.26595	-3.1455	-2.997	FALSE	FALSE	FALSE	FALSE	FALSE	FALSE	FALSE	FALSE	FALSE	FALSE	FALSE	FALSE	FALSE	FALSE
18	ZBTB14	NP_001137295.1	0.00741627	0.136124	-5.116	-4.0131	-2.8635	0.494091	-4.7355	-3.955	-3.37445	FALSE	FALSE	FALSE	FALSE	FALSE	FALSE	FALSE	FALSE	FALSE	FALSE	FALSE	FALSE	FALSE	FALSE
2	TRIM43	NP_620155.1	0.0317215	0.158726	-5.3025	-4.14591	-2.2145	0.500724	-4.8352	-4.1395	-3.5148	FALSE	FALSE	FALSE	FALSE	FALSE	FALSE	FALSE	TRUE	FALSE	FALSE	FALSE	FALSE	FALSE	FALSE
8	LRP12	NP_038465.1	0	0.0631154	-5.031	-3.70278	-2.1765	0.48009	-4.4512	-3.5865	-3.2005	FALSE	FALSE	FALSE	FALSE	FALSE	FALSE	FALSE	FALSE	FALSE	FALSE	FALSE	FALSE	FALSE	FALSE
6	TBC1D32	NP_689943.4	0	0	-4.393	-3.56528	-2.4495	0.299291	-4.062	-3.4775	-3.2567	FALSE	FALSE	FALSE	FALSE	FALSE	FALSE	FALSE	FALSE	FALSE	FALSE	FALSE	FALSE	FALSE	FALSE
3	MCCC1	NP_064551.3	0	0	-3.676	-3.33444	-2.107	0.214535	-3.5865	-3.3725	-3.021	FALSE	TRUE	FALSE	FALSE	FALSE	FALSE	TRUE	FALSE	FALSE	FALSE	TRUE	FALSE	FALSE	TRUE
X	RAB9B	NP_057454.1	0.215698	0.225738	-5.8295	-4.48874	-2.938	0.617913	-5.3072	-4.4835	-3.6748	FALSE	FALSE	FALSE	FALSE	FALSE	FALSE	FALSE	FALSE	FALSE	FALSE	FALSE	FALSE	FALSE	FALSE
X	PAGE2	NP_997222.1	0.00682261	0.0423977	-5.392	-3.94159	-2.018	0.429849	-4.45775	-3.96875	-3.4063	FALSE	FALSE	FALSE	FALSE	FALSE	FALSE	TRUE	FALSE	FALSE	FALSE	FALSE	FALSE	FALSE	FALSE
14	WDR20	NP_001229344.1	0	0	-4.0565	-3.74684	-3.037	0.203154	-3.9735	-3.804	-3.4331	FALSE	FALSE	FALSE	FALSE	FALSE	FALSE	TRUE	FALSE	FALSE	FALSE	FALSE	FALSE	FALSE	FALSE
9	UNC13B	NP_006368.3	0	0	-4.259	-3.5215	-2.334	0.227774	-3.819	-3.5035	-3.2515	FALSE	FALSE	FALSE	FALSE	FALSE	FALSE	FALSE	FALSE	FALSE	FALSE	FALSE	FALSE	FALSE	FALSE
16	SULT1A1	NP_001046.2	0.0218045	0.05	-5.781	-3.52246	-2.01	0.598952	-4.4516	-3.3345	-2.9425	FALSE	FALSE	FALSE	FALSE	FALSE	FALSE	TRUE	FALSE	FALSE	FALSE	FALSE	FALSE	FALSE	FALSE
1	PLPP3	NP_003704.3	0.0187678	0.117095	-5.342	-3.88601	-1.7145	0.639437	-4.69395	-3.911	-3.014	FALSE	FALSE	FALSE	FALSE	FALSE	FALSE	TRUE	FALSE	FALSE	FALSE	FALSE	FALSE	FALSE	FALSE
15	LCMT2	NP_055608.2	0	0	-4.358	-3.18374	-1.664	0.391002	-3.69025	-3.1875	-2.6795	FALSE	FALSE	FALSE	FALSE	FALSE	FALSE	FALSE	FALSE	FALSE	TRUE	FALSE	FALSE	FALSE	FALSE
16	ATXN2L	NP_663760.1	0.000117876	0.00878175	-5.14	-3.47855	-2.62	0.3918	-4.079	-3.358	-3.076	FALSE	FALSE	FALSE	FALSE	FALSE	FALSE	TRUE	FALSE	FALSE	FALSE	FALSE	FALSE	FALSE	FALSE
15	PIGB	NP_004846.4	0	0.00759631	-4.8835	-3.69673	-1.8005	0.414493	-4.236	-3.699	-3.148	FALSE	FALSE	FALSE	FALSE	FALSE	FALSE	FALSE	FALSE	FALSE	FALSE	TRUE	FALSE	FALSE	TRUE
X	BMP15	NP_005439.2	0	0	-4.399	-3.51382	-2.265	0.311526	-3.96585	-3.4695	-3.151	FALSE	FALSE	FALSE	FALSE	FALSE	FALSE	FALSE	FALSE	FALSE	FALSE	FALSE	FALSE	FALSE	FALSE
3	PSMD2	NP_002799.3	0.146012	0.13779	-6.362	-4.03567	-2.0565	0.879754	-5.2359	-4.0155	-2.873	FALSE	FALSE	FALSE	FALSE	FALSE	FALSE	TRUE	FALSE	FALSE	FALSE	FALSE	FALSE	FALSE	FALSE
9	RALGPS1	NP_001177659.1	0.242022	0.157066	-6.2815	-4.40554	-2.7205	0.803501	-5.5555	-4.3465	-3.36125	FALSE	FALSE	FALSE	FALSE	FALSE	FALSE	FALSE	FALSE	FALSE	FALSE	FALSE	FALSE	FALSE	FALSE
20	PPP1R3D	NP_006233.1	0	0	-4.134	-3.18989	-1.7055	0.367027	-3.71365	-3.1605	-2.729	FALSE	FALSE	FALSE	FALSE	FALSE	FALSE	FALSE	FALSE	FALSE	FALSE	FALSE	FALSE	FALSE	FALSE
17	HOXB8	NP_076921.1	0	0	-4.116	-3.60334	-2.9365	0.276225	-4.0295	-3.521	-3.2963	FALSE	FALSE	FALSE	FALSE	FALSE	FALSE	FALSE	FALSE	FALSE	FALSE	FALSE	FALSE	FALSE	FALSE
11	ALKBH3	NP_631917.1	0	0	-4.542	-3.58663	-2.3925	0.40216	-4.12785	-3.567	-3.06545	FALSE	FALSE	FALSE	FALSE	FALSE	FALSE	FALSE	FALSE	FALSE	FALSE	FALSE	FALSE	FALSE	FALSE
11	FBXO3	NP_036307.2	0	0.0149463	-4.7315	-3.7749	-2.36	0.413032	-4.34415	-3.767	-3.2425	FALSE	FALSE	FALSE	FALSE	FALSE	FALSE	FALSE	FALSE	FALSE	FALSE	FALSE	FALSE	FALSE	FALSE
X	MORC4	NP_078933.3	0.051721	0.0913616	-5.903	-3.93039	-2.93	0.55057	-4.8008	-3.7285	-3.3915	FALSE	FALSE	FALSE	FALSE	FALSE	FALSE	TRUE	FALSE	FALSE	FALSE	FALSE	FALSE	FALSE	FALSE
1	TEKT2	NP_055281.2	0	0	-3.8625	-3.30261	-2.531	0.221148	-3.606	-3.292	-3.028	FALSE	FALSE	FALSE	FALSE	FALSE	FALSE	FALSE	FALSE	FALSE	FALSE	FALSE	FALSE	FALSE	FALSE
8	HNF4G	NP_004124.5	0	0.0466792	-5.0455	-3.59387	-2.216	0.563781	-4.392	-3.54275	-2.8845	FALSE	FALSE	FALSE	FALSE	FALSE	FALSE	TRUE	FALSE	FALSE	FALSE	FALSE	FALSE	FALSE	FALSE
16	ATP2C2	NP_001273456.2	0.0166802	0.0333063	-7.139	-2.93306	0.5575	0.768574	-4.1848	-2.5175	-2.381	FALSE	FALSE	FALSE	TRUE	FALSE	FALSE	TRUE	FALSE	FALSE	TRUE	FALSE	FALSE	FALSE	FALSE
3	EEFSEC	NP_068756.2	0	0.00163516	-4.6735	-3.52227	-2.4135	0.509108	-4.2485	-3.493	-2.8405	FALSE	FALSE	FALSE	FALSE	FALSE	FALSE	TRUE	FALSE	FALSE	FALSE	FALSE	FALSE	FALSE	FALSE
1	USP33	NP_963918.1	0.133204	0.0856691	-6.386	-3.95286	-1.9645	0.821746	-5.256	-3.6955	-3.104	FALSE	FALSE	FALSE	FALSE	FALSE	FALSE	FALSE	FALSE	FALSE	FALSE	FALSE	FALSE	FALSE	FALSE
11	TRIM3	NP_150594.2	0.0377943	0.103122	-5.531	-3.77415	-2.14	0.684563	-4.7697	-3.6925	-2.9613	FALSE	FALSE	FALSE	FALSE	FALSE	FALSE	FALSE	FALSE	FALSE	FALSE	FALSE	FALSE	FALSE	FALSE
1	RNPC3	NP_060089.1	0	0	-4.483	-3.46146	-2.2555	0.368627	-3.9645	-3.4365	-2.99305	FALSE	FALSE	FALSE	FALSE	FALSE	FALSE	FALSE	FALSE	FALSE	FALSE	TRUE	FALSE	FALSE	TRUE
19	ARHGAP45	NP_036424.2	0	0.00114298	-4.703	-3.30493	-1.7485	0.494558	-4.0638	-3.2155	-2.732	FALSE	FALSE	FALSE	FALSE	FALSE	FALSE	TRUE	FALSE	FALSE	FALSE	FALSE	FALSE	FALSE	FALSE
15	ADAM10	NP_001101.1	0.207403	0.109452	-5.8255	-4.13347	-2.324	0.884387	-5.4436	-4.041	-3.007	FALSE	FALSE	FALSE	FALSE	FALSE	FALSE	TRUE	FALSE	FALSE	FALSE	FALSE	FALSE	FALSE	FALSE
19	MARCHF2	NP_001005415.1	0.0509554	0.0864901	-5.473	-3.69721	-2.136	0.671575	-4.8085	-3.4715	-3.0315	FALSE	FALSE	FALSE	FALSE	FALSE	FALSE	FALSE	FALSE	FALSE	FALSE	FALSE	FALSE	FALSE	FALSE
4	HNRNPD	NP_112737.1	0.343603	0.175866	-6.654	-4.6751	-2.177	0.884815	-5.89385	-4.66825	-3.52315	FALSE	FALSE	FALSE	FALSE	FALSE	FALSE	FALSE	FALSE	FALSE	FALSE	TRUE	TRUE	FALSE	TRUE
17	CCDC137	NP_954981.1	0	0	-3.721	-3.24587	-2.194	0.25375	-3.571	-3.269	-2.909	FALSE	FALSE	FALSE	FALSE	FALSE	FALSE	FALSE	FALSE	FALSE	FALSE	FALSE	FALSE	FALSE	FALSE
1	NMNAT1	NP_073624.2	0	0	-4.177	-3.60722	-2.6615	0.29244	-3.97	-3.63975	-3.1915	FALSE	FALSE	FALSE	FALSE	FALSE	FALSE	FALSE	FALSE	FALSE	FALSE	TRUE	FALSE	FALSE	TRUE
19	YIF1B	NP_001034761.1	0	0.00833951	-4.8285	-3.55684	-1.7235	0.53901	-4.25875	-3.57	-2.84975	FALSE	FALSE	FALSE	FALSE	FALSE	FALSE	TRUE	FALSE	FALSE	FALSE	FALSE	FALSE	FALSE	FALSE
1	GABPB2	NP_653219.1	0	0	-4.592	-3.66721	-1.938	0.457281	-4.388	-3.56275	-3.1485	FALSE	FALSE	FALSE	FALSE	FALSE	FALSE	FALSE	FALSE	FALSE	FALSE	FALSE	FALSE	FALSE	FALSE
11	MS4A7	NP_996822.1	0	0.00250627	-4.6525	-3.69381	-2.243	0.500337	-4.349	-3.71	-2.9725	FALSE	FALSE	FALSE	FALSE	FALSE	FALSE	FALSE	FALSE	FALSE	FALSE	FALSE	FALSE	FALSE	FALSE
X	ZNF711	NP_068838.3	0.0933827	0.329586	-5.4215	-4.4889	-2.532	0.440591	-5.0418	-4.5385	-3.88385	FALSE	FALSE	FALSE	FALSE	FALSE	FALSE	FALSE	FALSE	FALSE	FALSE	TRUE	FALSE	FALSE	TRUE
17	CLTC	NP_001275582.1	0.159664	0.293549	-6.167	-4.52603	-3.263	0.536732	-5.207	-4.5425	-3.803	FALSE	FALSE	FALSE	FALSE	FALSE	FALSE	FALSE	FALSE	FALSE	FALSE	TRUE	TRUE	TRUE	TRUE
15	MEX3B	NP_115622.2	0	0	-4.5005	-3.34107	-1.94	0.586282	-4.1725	-3.2685	-2.605	FALSE	FALSE	FALSE	FALSE	FALSE	FALSE	FALSE	FALSE	FALSE	TRUE	FALSE	FALSE	FALSE	FALSE
1	TSACC	NP_001291755.1	0	0	-4.33	-3.73245	-1.7365	0.199984	-3.93575	-3.7565	-3.51675	FALSE	FALSE	FALSE	FALSE	FALSE	FALSE	TRUE	FALSE	FALSE	FALSE	FALSE	FALSE	FALSE	FALSE
1	LHX4	NP_203129.1	0	0	-4.1555	-3.65654	-2.559	0.329389	-4.039	-3.7155	-3.1836	TRUE	FALSE	TRUE	FALSE	FALSE	FALSE	FALSE	FALSE	FALSE	FALSE	TRUE	FALSE	FALSE	TRUE
4	HPF1	NP_060337.2	0	0	-4.4475	-3.4374	-2.5995	0.264157	-3.7758	-3.4365	-3.0925	FALSE	FALSE	FALSE	FALSE	FALSE	FALSE	FALSE	FALSE	FALSE	FALSE	FALSE	FALSE	FALSE	FALSE
7	KIAA1549	NP_001158137.1	0	0.00900277	-5.037	-3.36656	-2.317	0.393743	-3.886	-3.304	-2.933	FALSE	FALSE	FALSE	FALSE	FALSE	FALSE	FALSE	FALSE	FALSE	FALSE	FALSE	FALSE	FALSE	FALSE
12	BICDL1	NP_001354815.1	9.98702e-05	0.0481374	-5.0715	-3.62521	-1.754	0.58193	-4.4194	-3.613	-2.8685	FALSE	FALSE	FALSE	FALSE	FALSE	FALSE	FALSE	FALSE	FALSE	FALSE	FALSE	FALSE	FALSE	FALSE
7	AGK	NP_060708.1	0	0	-4.526	-3.64982	-2.4435	0.373765	-4.16755	-3.6255	-3.175	FALSE	FALSE	FALSE	FALSE	FALSE	FALSE	FALSE	FALSE	FALSE	FALSE	TRUE	FALSE	FALSE	TRUE
12	CLEC7A	NP_922938.1	0	0	-3.7545	-3.45408	-2.4815	0.159581	-3.65545	-3.4605	-3.25105	TRUE	FALSE	FALSE	FALSE	FALSE	FALSE	FALSE	FALSE	FALSE	FALSE	FALSE	FALSE	FALSE	FALSE
12	CDK17	NP_001163935.1	0.0974899	0.156275	-5.8615	-4.16217	-2.424	0.626941	-5.0461	-4.1125	-3.373	FALSE	FALSE	FALSE	FALSE	FALSE	FALSE	TRUE	FALSE	FALSE	FALSE	FALSE	FALSE	FALSE	FALSE
5	CXXC5	NP_001304139.1	0.0115132	0.134046	-5.091	-3.67936	-2.7805	0.591475	-4.855	-3.4355	-3.18435	FALSE	FALSE	FALSE	FALSE	FALSE	FALSE	FALSE	FALSE	FALSE	FALSE	FALSE	FALSE	FALSE	FALSE
12	CLEC4A	NP_057268.1	0	0.0518219	-4.8425	-3.79449	-1.8855	0.545288	-4.51205	-3.82725	-3.04495	FALSE	FALSE	FALSE	FALSE	FALSE	FALSE	FALSE	FALSE	FALSE	FALSE	FALSE	FALSE	FALSE	FALSE
11	MMP8	NP_002415.1	0	0	-4.2	-3.31804	-1.991	0.394295	-3.846	-3.3165	-2.7945	FALSE	FALSE	FALSE	FALSE	FALSE	FALSE	TRUE	FALSE	FALSE	FALSE	FALSE	FALSE	FALSE	FALSE
2	LY75	NP_002340.2	0	0	-4.2775	-3.55278	-2.281	0.262354	-3.9165	-3.542	-3.234	FALSE	FALSE	FALSE	FALSE	FALSE	FALSE	FALSE	FALSE	FALSE	FALSE	FALSE	FALSE	FALSE	FALSE
20	SCRT2	NP_149120.1	0	0.0354571	-4.8795	-3.58701	-2.204	0.642101	-4.44555	-3.6095	-2.7599	FALSE	FALSE	FALSE	FALSE	FALSE	FALSE	FALSE	FALSE	FALSE	FALSE	FALSE	FALSE	FALSE	FALSE
19	ZNF333	NP_115809.1	0	0.0193237	-4.852	-3.64541	-2.3835	0.437614	-4.2565	-3.6005	-3.1145	FALSE	FALSE	FALSE	FALSE	FALSE	FALSE	FALSE	FALSE	FALSE	FALSE	FALSE	FALSE	FALSE	FALSE
6	TCP11	NP_001248749.1	0.000375047	0.0675084	-5.082	-3.7659	-2.2515	0.549825	-4.5161	-3.751	-3.0532	FALSE	FALSE	FALSE	FALSE	FALSE	FALSE	TRUE	FALSE	FALSE	FALSE	FALSE	FALSE	FALSE	FALSE
19	CCDC106	NP_037433.2	0	0	-4.5805	-3.45165	-2.27	0.449677	-4.0495	-3.43125	-2.87585	FALSE	FALSE	FALSE	FALSE	FALSE	FALSE	FALSE	FALSE	FALSE	FALSE	FALSE	FALSE	FALSE	FALSE
3	HACL1	NP_036392.2	0	0.00588062	-4.7825	-3.56505	-2.1345	0.497249	-4.2335	-3.556	-2.9026	FALSE	FALSE	FALSE	FALSE	FALSE	FALSE	FALSE	FALSE	FALSE	FALSE	FALSE	FALSE	FALSE	FALSE
22	L3MBTL2	NP_113676.2	0.13593	0.0791546	-6.264	-3.94114	-1.8465	0.844082	-5.3309	-3.5875	-3.169	FALSE	FALSE	FALSE	FALSE	FALSE	FALSE	FALSE	FALSE	FALSE	FALSE	FALSE	FALSE	FALSE	FALSE
9	RNF208	NP_112587.2	0	0	-4.065	-3.28732	-2.588	0.219705	-3.56575	-3.267	-3.042	FALSE	FALSE	FALSE	FALSE	FALSE	FALSE	FALSE	FALSE	FALSE	FALSE	FALSE	FALSE	FALSE	FALSE
7	KLHL7	NP_001026880.2	0	0	-4.374	-4.00861	-3.286	0.156373	-4.2235	-4.007	-3.8105	TRUE	FALSE	FALSE	FALSE	FALSE	FALSE	TRUE	FALSE	FALSE	FALSE	TRUE	FALSE	FALSE	TRUE
6	CCHCR1	NP_001099034.1	0	0	-3.773	-3.45029	-2.256	0.234302	-3.743	-3.475	-3.136	FALSE	FALSE	FALSE	FALSE	FALSE	FALSE	TRUE	FALSE	FALSE	FALSE	FALSE	FALSE	FALSE	FALSE
8	FBXO43	NP_001025031.2	0	0	-4.513	-3.65945	-2.3625	0.347062	-4.1625	-3.6425	-3.225	FALSE	FALSE	FALSE	FALSE	FALSE	FALSE	FALSE	FALSE	FALSE	FALSE	FALSE	FALSE	FALSE	FALSE
12	KCNC2	NP_631875.1	0.279267	0.172036	-6.153	-4.43777	-1.8685	0.846808	-5.5305	-4.488	-3.23505	FALSE	FALSE	FALSE	FALSE	FALSE	FALSE	FALSE	FALSE	FALSE	FALSE	FALSE	FALSE	FALSE	FALSE
8	DPY19L4	NP_861452.2	0	0	-4.585	-3.56332	-2.0945	0.39862	-4.088	-3.571	-3.032	FALSE	FALSE	FALSE	FALSE	FALSE	FALSE	FALSE	FALSE	FALSE	FALSE	FALSE	FALSE	FALSE	FALSE
1	LZIC	NP_001303903.1	0	0.0382775	-4.911	-3.88154	-2.6335	0.394191	-4.4413	-3.846	-3.3987	FALSE	FALSE	FALSE	FALSE	FALSE	FALSE	FALSE	FALSE	FALSE	FALSE	FALSE	FALSE	FALSE	FALSE
15	SPATA5L1	NP_076968.2	0	0.00566549	-4.838	-3.45795	-2.6405	0.475485	-4.1711	-3.369	-2.899	FALSE	FALSE	FALSE	FALSE	FALSE	FALSE	TRUE	FALSE	FALSE	FALSE	TRUE	FALSE	FALSE	TRUE
11	TH	NP_954986.2	0	0.0028483	-4.82	-3.35947	-2.228	0.498797	-4.0585	-3.3065	-2.7347	FALSE	TRUE	FALSE	FALSE	FALSE	FALSE	TRUE	FALSE	FALSE	FALSE	TRUE	FALSE	FALSE	TRUE
10	LGI1	NP_001295205.1	0.0202801	0.0661516	-5.3955	-3.92894	-2.774	0.44148	-4.5625	-3.851	-3.43215	TRUE	FALSE	FALSE	FALSE	FALSE	FALSE	FALSE	FALSE	FALSE	FALSE	FALSE	FALSE	FALSE	FALSE
4	COL25A1	NP_942014.1	0	0.0107838	-4.988	-3.70673	-2.336	0.50475	-4.37475	-3.6895	-3.0045	FALSE	FALSE	FALSE	FALSE	FALSE	FALSE	FALSE	FALSE	FALSE	FALSE	TRUE	FALSE	FALSE	TRUE
1	TRAF5	NP_001306136.1	0	0	-4.254	-3.68922	-2.565	0.303818	-4.1125	-3.683	-3.2959	FALSE	FALSE	FALSE	FALSE	FALSE	FALSE	FALSE	FALSE	FALSE	FALSE	FALSE	FALSE	FALSE	FALSE
12	RHNO1	NP_001239428.1	0	0.000222074	-4.736	-3.30839	-2.134	0.266953	-3.6185	-3.325	-2.9631	FALSE	FALSE	FALSE	FALSE	FALSE	FALSE	FALSE	FALSE	FALSE	FALSE	FALSE	FALSE	FALSE	FALSE
10	EEF1AKMT2	NP_001291396.1	0	0	-4.2355	-3.6873	-3.3265	0.198936	-3.975	-3.6625	-3.458	FALSE	FALSE	FALSE	FALSE	FALSE	FALSE	FALSE	FALSE	FALSE	FALSE	FALSE	FALSE	FALSE	FALSE
2	HSPE1	NP_002148.1	0.2309	0.157895	-6.182	-4.21439	-1.9775	0.967835	-5.4637	-4.274	-2.8556	FALSE	FALSE	FALSE	FALSE	FALSE	FALSE	FALSE	FALSE	FALSE	FALSE	FALSE	FALSE	FALSE	FALSE
20	C20orf96	NP_695001.2	0	0	-4.1235	-3.34952	-2.186	0.346557	-3.7735	-3.385	-2.868	FALSE	FALSE	FALSE	FALSE	FALSE	FALSE	FALSE	FALSE	FALSE	FALSE	FALSE	FALSE	FALSE	FALSE
1	TNNI1	NP_003272.3	0	0	-3.9565	-3.61971	-2.8075	0.180283	-3.8295	-3.6465	-3.3706	FALSE	FALSE	FALSE	FALSE	FALSE	FALSE	FALSE	FALSE	FALSE	FALSE	FALSE	FALSE	FALSE	FALSE
17	TRPV3	NP_659505.1	0	0	-4.586	-3.37598	-1.9985	0.397991	-3.91145	-3.3645	-2.8605	FALSE	FALSE	FALSE	FALSE	FALSE	FALSE	FALSE	FALSE	FALSE	FALSE	TRUE	FALSE	FALSE	TRUE
3	ECE2	NP_001093590.1	0.00176462	0.0482584	-5.184	-3.56931	-2.556	0.553214	-4.3965	-3.4665	-2.92665	FALSE	FALSE	FALSE	FALSE	FALSE	FALSE	TRUE	FALSE	FALSE	FALSE	FALSE	FALSE	FALSE	FALSE
9	NPDC1	NP_056207.3	0.065932	0.0877826	-5.4945	-3.60902	-1.653	0.764933	-4.9054	-3.398	-2.8075	FALSE	FALSE	FALSE	FALSE	FALSE	FALSE	TRUE	FALSE	FALSE	FALSE	FALSE	FALSE	FALSE	FALSE
X	IDS	NP_006114.1	0.188021	0.107212	-6.677	-4.25379	-3.238	0.793971	-5.4974	-4.016	-3.4301	FALSE	FALSE	TRUE	FALSE	FALSE	FALSE	FALSE	FALSE	FALSE	FALSE	TRUE	FALSE	FALSE	TRUE
X	VCX3A	NP_057463.2	0.00683005	0.0140619	-5.247	-3.09285	-1.281	0.46613	-3.5261	-3.029	-2.7794	FALSE	FALSE	FALSE	FALSE	FALSE	FALSE	FALSE	FALSE	FALSE	FALSE	FALSE	FALSE	FALSE	FALSE
X	PPP1R3F	NP_149992.3	0	0	-3.6865	-3.39948	-2.419	0.1434	-3.5375	-3.4285	-3.226	FALSE	FALSE	FALSE	FALSE	FALSE	FALSE	FALSE	FALSE	FALSE	FALSE	FALSE	FALSE	FALSE	FALSE
17	SLC16A5	NP_001258694.1	0	0	-4.208	-3.48633	-1.901	0.338502	-3.93675	-3.485	-3.05325	FALSE	FALSE	FALSE	FALSE	FALSE	FALSE	FALSE	FALSE	FALSE	FALSE	FALSE	FALSE	FALSE	FALSE
9	FAM205A	NP_001135389.1	0.000829155	0.00975244	-5.553	-3.6362	-2.2665	0.39064	-4.0915	-3.6585	-3.12	FALSE	FALSE	FALSE	FALSE	FALSE	FALSE	TRUE	FALSE	FALSE	FALSE	FALSE	FALSE	FALSE	FALSE
6	CCN2	NP_001892.2	0	0	-4.041	-3.43867	-2.2895	0.327106	-3.8975	-3.446	-2.9997	FALSE	FALSE	FALSE	FALSE	FALSE	FALSE	FALSE	FALSE	FALSE	FALSE	FALSE	FALSE	FALSE	FALSE
6	WTAP	NP_004897.2	0.178635	0.239072	-5.6445	-4.3992	-2.1205	0.651218	-5.2225	-4.461	-3.50665	FALSE	FALSE	FALSE	FALSE	FALSE	FALSE	FALSE	FALSE	FALSE	FALSE	FALSE	FALSE	FALSE	FALSE
16	CCP110	NP_001310498.1	0	0	-4.3065	-3.62933	-1.7795	0.304669	-4.018	-3.653	-3.18815	FALSE	FALSE	FALSE	FALSE	FALSE	FALSE	FALSE	FALSE	FALSE	FALSE	FALSE	FALSE	FALSE	FALSE
19	PLEKHG2	NP_073746.2	0	0.00150266	-4.8355	-3.36149	-1.9185	0.372986	-3.91485	-3.298	-2.9485	FALSE	FALSE	FALSE	FALSE	FALSE	FALSE	FALSE	FALSE	FALSE	FALSE	FALSE	FALSE	FALSE	FALSE
12	GLT1D1	NP_653270.1	0	0	-3.8685	-3.33037	-1.7865	0.327643	-3.75355	-3.3465	-2.89845	FALSE	FALSE	FALSE	FALSE	FALSE	FALSE	FALSE	FALSE	FALSE	FALSE	FALSE	FALSE	FALSE	FALSE
19	IGFL2	NP_001002915.2	0	0	-3.981	-3.46952	-2.5635	0.217706	-3.72495	-3.491	-3.1771	FALSE	FALSE	FALSE	FALSE	FALSE	FALSE	FALSE	FALSE	FALSE	FALSE	FALSE	FALSE	FALSE	FALSE
14	FSCB	NP_115511.3	0.00857385	0.0398981	-5.399	-3.45177	-2.1855	0.548629	-4.3131	-3.281	-2.89	FALSE	FALSE	FALSE	FALSE	FALSE	FALSE	FALSE	FALSE	FALSE	FALSE	FALSE	FALSE	FALSE	FALSE
21	C2CD2	NP_056315.1	0	0	-4.449	-3.506	-1.844	0.491304	-4.109	-3.5685	-2.8038	FALSE	FALSE	FALSE	FALSE	FALSE	FALSE	FALSE	FALSE	FALSE	FALSE	FALSE	FALSE	FALSE	FALSE
5	C1QTNF3	NP_852100.3	0	0	-4.2115	-3.70492	-2.4465	0.301375	-4.101	-3.71825	-3.281	FALSE	FALSE	FALSE	FALSE	FALSE	FALSE	FALSE	FALSE	FALSE	FALSE	FALSE	FALSE	FALSE	FALSE
7	BRAT1	NP_689956.2	0	0	-4.0785	-3.23879	-1.552	0.402627	-3.775	-3.254	-2.694	FALSE	FALSE	FALSE	FALSE	FALSE	FALSE	FALSE	FALSE	FALSE	FALSE	TRUE	FALSE	FALSE	TRUE
15	KLHL25	NP_071925.2	0	0	-4.02	-2.99117	-1.777	0.354083	-3.4855	-2.9705	-2.53785	FALSE	FALSE	FALSE	FALSE	FALSE	FALSE	FALSE	FALSE	FALSE	FALSE	FALSE	FALSE	FALSE	FALSE
6	RHAG	NP_000315.2	0	0.328127	-4.892	-4.36106	-3.2395	0.369675	-4.773	-4.4585	-3.7885	FALSE	TRUE	FALSE	FALSE	FALSE	FALSE	TRUE	FALSE	FALSE	FALSE	FALSE	FALSE	FALSE	FALSE
14	PLD4	NP_620145.2	0	0	-4.5715	-3.47429	-2.024	0.374175	-4.0233	-3.3895	-3.088	FALSE	FALSE	FALSE	FALSE	FALSE	FALSE	TRUE	FALSE	FALSE	FALSE	FALSE	FALSE	FALSE	FALSE
X	HTR2C	NP_001243689.2	0.315641	0.128095	-6.42	-4.49927	-2.318	0.909035	-5.7986	-4.4395	-3.3405	FALSE	FALSE	FALSE	FALSE	FALSE	FALSE	FALSE	FALSE	FALSE	FALSE	FALSE	FALSE	FALSE	FALSE
6	UBD	NP_006389.2	0	0	-4.275	-3.49145	-1.6425	0.4052	-3.999	-3.53125	-2.96245	FALSE	FALSE	FALSE	FALSE	FALSE	FALSE	TRUE	FALSE	FALSE	FALSE	FALSE	FALSE	FALSE	FALSE
19	PSG8	NP_874366.1	0	0	-4.5675	-3.14996	0.035	0.571496	-3.861	-3.156	-2.4462	FALSE	FALSE	FALSE	FALSE	FALSE	FALSE	FALSE	FALSE	FALSE	FALSE	FALSE	FALSE	FALSE	FALSE
10	PCGF5	NP_001243478.1	0.272641	0.197487	-5.7825	-4.53785	-3.2705	0.601605	-5.31715	-4.538	-3.72835	FALSE	FALSE	FALSE	FALSE	FALSE	FALSE	FALSE	FALSE	FALSE	FALSE	FALSE	FALSE	FALSE	FALSE
X	DHRSX	NP_660160.2	0.00147738	0.0363804	-5.2015	-3.49636	-2.234	0.540347	-4.3388	-3.3435	-2.9157	FALSE	FALSE	FALSE	FALSE	FALSE	FALSE	FALSE	FALSE	FALSE	FALSE	FALSE	FALSE	FALSE	FALSE
8	FAM167A	NP_444509.2	0	0	-3.669	-2.9258	-1.474	0.321634	-3.36045	-2.94625	-2.4917	FALSE	FALSE	FALSE	FALSE	FALSE	FALSE	TRUE	FALSE	FALSE	FALSE	FALSE	FALSE	FALSE	FALSE
7	BUD23	NP_001189489.1	0.000190006	0.0123504	-5.0575	-3.51972	-3.038	0.355443	-4.0587	-3.3895	-3.2025	FALSE	FALSE	FALSE	FALSE	FALSE	FALSE	FALSE	FALSE	FALSE	FALSE	FALSE	FALSE	FALSE	FALSE
1	SRP9	NP_003124.1	0	0.0195682	-4.7585	-3.99334	-2.794	0.344467	-4.4098	-4.03675	-3.52315	FALSE	FALSE	FALSE	FALSE	FALSE	FALSE	TRUE	TRUE	FALSE	FALSE	FALSE	FALSE	FALSE	FALSE
12	BIN2	NP_057377.4	0	0	-4.4815	-3.68593	-1.9365	0.423709	-4.182	-3.751	-3.0975	FALSE	FALSE	FALSE	FALSE	FALSE	FALSE	TRUE	FALSE	FALSE	FALSE	FALSE	FALSE	FALSE	FALSE
1	MSH4	NP_002431.2	0.00362976	0.0678487	-5.2975	-3.76324	-2.122	0.543391	-4.52075	-3.734	-3.0615	FALSE	FALSE	FALSE	FALSE	FALSE	FALSE	FALSE	FALSE	FALSE	FALSE	FALSE	FALSE	FALSE	FALSE
18	MALT1	NP_006776.1	0.104763	0.145094	-5.694	-4.05898	-2.625	0.71038	-5.073	-4.0165	-3.14965	FALSE	FALSE	FALSE	FALSE	FALSE	FALSE	TRUE	FALSE	FALSE	FALSE	FALSE	FALSE	FALSE	FALSE
X	ATXN3L	NP_001129467.1	0	0	-4.0465	-3.65978	-1.948	0.254023	-3.909	-3.7465	-3.307	FALSE	FALSE	FALSE	FALSE	FALSE	FALSE	FALSE	FALSE	FALSE	FALSE	FALSE	FALSE	FALSE	FALSE
7	SGCE	NP_003910.1	0	0.000803536	-4.6985	-3.69677	-2.734	0.327491	-4.1462	-3.6835	-3.277	TRUE	FALSE	TRUE	FALSE	FALSE	FALSE	TRUE	FALSE	FALSE	FALSE	FALSE	FALSE	FALSE	TRUE
19	MED26	NP_004822.2	0	0	-4.1195	-3.23763	-2.1815	0.329136	-3.739	-3.154	-2.9105	FALSE	FALSE	FALSE	FALSE	FALSE	FALSE	TRUE	FALSE	FALSE	FALSE	FALSE	FALSE	FALSE	FALSE
2	GLS	NP_055720.3	0.228644	0.231174	-6.0515	-4.49993	-2.644	0.65073	-5.35105	-4.539	-3.602	FALSE	FALSE	FALSE	FALSE	FALSE	FALSE	FALSE	FALSE	FALSE	FALSE	FALSE	FALSE	FALSE	FALSE
1	OTUD3	NP_056022.1	0	0	-4.5765	-3.6012	-2.287	0.402418	-4.20025	-3.5435	-3.12	FALSE	FALSE	FALSE	FALSE	FALSE	FALSE	TRUE	FALSE	FALSE	FALSE	FALSE	FALSE	FALSE	FALSE
10	GLUD1	NP_005262.1	0	0.088499	-4.993	-3.91572	-2.315	0.502233	-4.5906	-3.919	-3.2437	TRUE	FALSE	FALSE	FALSE	FALSE	FALSE	FALSE	FALSE	FALSE	FALSE	TRUE	FALSE	FALSE	TRUE
4	BEND4	NP_997289.2	0	0	-4.076	-3.18869	-1.8615	0.379972	-3.7545	-3.149	-2.7225	FALSE	FALSE	FALSE	FALSE	FALSE	FALSE	FALSE	FALSE	FALSE	FALSE	FALSE	FALSE	FALSE	FALSE
12	KRT4	NP_002263.3	0.068104	0.0636652	-6.3045	-3.57802	-2.1415	0.828783	-4.8133	-3.3715	-2.6695	TRUE	FALSE	FALSE	TRUE	FALSE	FALSE	FALSE	FALSE	FALSE	FALSE	FALSE	FALSE	FALSE	FALSE
7	ADAP1	NP_001271240.2	0	0.0326546	-4.7745	-3.3952	-0.8085	0.664971	-4.39825	-3.31425	-2.58525	FALSE	FALSE	FALSE	FALSE	FALSE	FALSE	FALSE	FALSE	FALSE	TRUE	FALSE	FALSE	FALSE	FALSE
5	ADAM19	NP_150377.1	0	0	-4.358	-3.55421	-2.2655	0.402567	-4.1045	-3.561	-3.01	FALSE	FALSE	FALSE	FALSE	FALSE	FALSE	TRUE	FALSE	FALSE	FALSE	FALSE	FALSE	FALSE	FALSE
1	DRAM2	NP_848549.3	0	0	-4.2305	-3.64153	-1.544	0.440044	-4.0885	-3.76725	-2.99845	FALSE	FALSE	FALSE	FALSE	FALSE	FALSE	FALSE	FALSE	FALSE	FALSE	FALSE	FALSE	FALSE	FALSE
1	ZNF124	NP_001284497.1	0	0.000152555	-4.643	-3.39447	-1.9535	0.491969	-4.092	-3.3445	-2.795	FALSE	FALSE	FALSE	FALSE	FALSE	FALSE	FALSE	FALSE	FALSE	FALSE	FALSE	FALSE	FALSE	FALSE
1	GNAI3	NP_006487.1	0	0.0393976	-4.9485	-3.80477	-2.185	0.511372	-4.474	-3.821	-3.103	FALSE	FALSE	FALSE	FALSE	FALSE	FALSE	FALSE	FALSE	FALSE	FALSE	TRUE	FALSE	FALSE	TRUE
X	MSN	NP_002435.1	0.163362	0.212658	-6.2635	-4.39364	-3.063	0.623174	-5.2435	-4.3725	-3.58155	FALSE	FALSE	FALSE	FALSE	FALSE	FALSE	FALSE	FALSE	FALSE	FALSE	FALSE	FALSE	FALSE	FALSE
1	SAMD13	NP_001128135.1	0.0357895	0.330526	-5.199	-4.31334	-2.28	0.536783	-4.9596	-4.4145	-3.5536	FALSE	FALSE	FALSE	FALSE	FALSE	FALSE	FALSE	FALSE	FALSE	FALSE	FALSE	FALSE	FALSE	FALSE
2	COPS7B	NP_001269881.1	0.0522267	0.164777	-5.369	-3.94364	-1.913	0.700847	-4.91315	-3.92025	-3.0119	FALSE	FALSE	FALSE	FALSE	FALSE	FALSE	FALSE	FALSE	FALSE	FALSE	FALSE	FALSE	FALSE	FALSE
4	ZNF595	NP_872330.1	0.102737	0.0693336	-6.5955	-3.59067	-0.8185	0.932208	-5.0705	-3.2875	-2.6865	FALSE	FALSE	FALSE	FALSE	FALSE	FALSE	FALSE	FALSE	FALSE	FALSE	FALSE	FALSE	FALSE	FALSE
2	PSMD1	NP_002798.2	0.202825	0.146704	-6.6225	-4.24815	-2.8005	0.846001	-5.43	-4.168	-3.162	FALSE	FALSE	FALSE	FALSE	FALSE	FALSE	FALSE	FALSE	FALSE	FALSE	FALSE	FALSE	FALSE	FALSE
1	CAP1	NP_006358.2	0.0755392	0.11979	-6.2775	-3.82691	-1.7515	0.798797	-4.9436	-3.743	-2.9005	FALSE	FALSE	FALSE	FALSE	FALSE	FALSE	FALSE	FALSE	FALSE	FALSE	FALSE	FALSE	FALSE	FALSE
5	IK	NP_006074.2	0.112321	0.167574	-5.8525	-4.20191	-2.4795	0.627971	-5.09565	-4.1575	-3.3975	FALSE	FALSE	FALSE	FALSE	FALSE	FALSE	FALSE	FALSE	FALSE	FALSE	FALSE	FALSE	FALSE	FALSE
3	TAGLN3	NP_001008273.1	0	0.0108033	-4.795	-3.70571	-2.404	0.473138	-4.37455	-3.6915	-3.078	FALSE	FALSE	FALSE	FALSE	FALSE	FALSE	FALSE	FALSE	FALSE	FALSE	FALSE	FALSE	FALSE	FALSE
20	GNRH2	NP_001297149.1	0	0.0199147	-4.8815	-3.3578	-2.2005	0.384628	-3.8147	-3.291	-2.9647	FALSE	FALSE	FALSE	FALSE	FALSE	FALSE	FALSE	FALSE	FALSE	FALSE	FALSE	FALSE	FALSE	FALSE
1	GNG4	NP_001092192.1	0	0	-4.0205	-3.34943	-2.4485	0.25757	-3.6684	-3.381	-3.0035	FALSE	FALSE	FALSE	FALSE	FALSE	FALSE	FALSE	FALSE	FALSE	FALSE	FALSE	FALSE	FALSE	FALSE
5	GALNT10	NP_938080.1	0	0	-4.5315	-3.58513	-1.9135	0.423201	-4.13645	-3.60325	-3.0225	FALSE	FALSE	FALSE	FALSE	FALSE	FALSE	TRUE	FALSE	FALSE	FALSE	FALSE	FALSE	FALSE	FALSE
6	RAET1G	NP_001001788.2	0	0	-4.2895	-3.43957	-1.251	0.466661	-4.03515	-3.47	-2.81905	FALSE	FALSE	FALSE	FALSE	FALSE	FALSE	FALSE	FALSE	FALSE	FALSE	FALSE	FALSE	FALSE	FALSE
5	KCTD16	NP_065819.1	0.0401768	0.0855765	-5.593	-3.80883	-2.3005	0.621724	-4.7145	-3.69175	-3.099	FALSE	FALSE	FALSE	FALSE	FALSE	FALSE	FALSE	FALSE	FALSE	FALSE	FALSE	FALSE	FALSE	FALSE
3	SHOX2	NP_003021.3	0	0.00528614	-4.7185	-3.53406	-2.433	0.520533	-4.2595	-3.5005	-2.8315	FALSE	FALSE	FALSE	FALSE	FALSE	FALSE	FALSE	FALSE	FALSE	FALSE	FALSE	FALSE	FALSE	FALSE
9	QRFP	NP_937823.1	0	0	-3.6565	-3.02393	-1.9785	0.307569	-3.3263	-3.121	-2.5304	FALSE	FALSE	FALSE	FALSE	FALSE	FALSE	FALSE	FALSE	FALSE	FALSE	FALSE	FALSE	FALSE	FALSE
6	VTA1	NP_057569.2	0.00356824	0.0337199	-5.456	-3.4376	-2.2765	0.607189	-4.3265	-3.325	-2.7295	FALSE	FALSE	FALSE	FALSE	FALSE	FALSE	TRUE	FALSE	FALSE	FALSE	FALSE	FALSE	FALSE	FALSE
16	MRTFB	NP_054767.3	0.00345035	0.0507147	-5.3085	-3.57316	-1.704	0.547338	-4.432	-3.4195	-2.988	FALSE	FALSE	FALSE	FALSE	FALSE	FALSE	FALSE	FALSE	FALSE	FALSE	FALSE	FALSE	FALSE	FALSE
19	ZNF565	NP_001353118.1	0.0584443	0.0604523	-6.326	-3.70102	-2.0335	0.697735	-4.72245	-3.525	-2.9835	FALSE	FALSE	FALSE	FALSE	FALSE	FALSE	FALSE	FALSE	FALSE	FALSE	FALSE	FALSE	FALSE	FALSE
17	OR1A1	NP_055380.2	0.000174277	0.0139421	-5.0955	-3.35784	-2.05	0.535126	-4.142	-3.28425	-2.7275	FALSE	FALSE	FALSE	FALSE	FALSE	FALSE	FALSE	FALSE	FALSE	FALSE	FALSE	FALSE	FALSE	FALSE
11	OR2D2	NP_003691.1	0.0116765	0.0578599	-5.4055	-3.40573	-2.264	0.72521	-4.45615	-3.31325	-2.517	FALSE	FALSE	FALSE	FALSE	FALSE	FALSE	FALSE	FALSE	FALSE	FALSE	FALSE	FALSE	FALSE	FALSE
X	ZNF630	NP_001032824.2	0.0935583	0.0638521	-6.4845	-3.95174	-1.7915	0.67137	-5.00125	-3.6885	-3.3885	FALSE	FALSE	FALSE	FALSE	FALSE	FALSE	FALSE	FALSE	FALSE	FALSE	FALSE	FALSE	FALSE	FALSE
5	SLC12A2	NP_001037.1	0.0278638	0.112565	-5.571	-3.83882	-1.811	0.655367	-4.7396	-3.8175	-2.988	FALSE	FALSE	FALSE	FALSE	FALSE	FALSE	TRUE	FALSE	FALSE	FALSE	FALSE	FALSE	FALSE	FALSE
13	EXOSC8	NP_852480.1	0	0.0252316	-4.9755	-3.77396	-2.0125	0.488706	-4.409	-3.8	-3.1273	FALSE	FALSE	FALSE	FALSE	FALSE	FALSE	FALSE	FALSE	FALSE	FALSE	FALSE	FALSE	FALSE	FALSE
15	FBXL22	NP_976307.2	0	0	-3.4735	-3.09935	-2.602	0.161467	-3.3495	-3.079	-2.9175	FALSE	FALSE	FALSE	FALSE	FALSE	FALSE	FALSE	FALSE	FALSE	FALSE	FALSE	FALSE	FALSE	FALSE
4	ACSL1	NP_001273637.1	0.0134484	0.102026	-5.3565	-3.76282	-2.029	0.642217	-4.66375	-3.7285	-2.934	FALSE	FALSE	FALSE	FALSE	FALSE	FALSE	TRUE	FALSE	FALSE	FALSE	FALSE	FALSE	FALSE	FALSE
17	VTN	NP_000629.3	0	0.000686499	-4.67	-3.39582	-2.5765	0.353363	-3.934	-3.2935	-3.026	FALSE	FALSE	FALSE	FALSE	FALSE	FALSE	TRUE	FALSE	FALSE	FALSE	FALSE	FALSE	FALSE	FALSE
18	TXNDC2	NP_001091999.1	0.267649	0.0962807	-5.92	-4.10155	-1.915	1.05739	-5.6015	-3.9255	-2.7466	FALSE	FALSE	FALSE	FALSE	FALSE	FALSE	FALSE	FALSE	FALSE	FALSE	FALSE	FALSE	FALSE	FALSE
12	OR6C70	NP_001005499.1	0.0353186	0.078428	-5.7405	-3.4149	-0.786	0.827299	-4.6885	-3.235	-2.498	FALSE	FALSE	FALSE	FALSE	FALSE	FALSE	FALSE	FALSE	FALSE	FALSE	FALSE	FALSE	FALSE	FALSE
4	INTS12	NP_001135943.1	0.00587355	0.0547046	-5.2395	-3.84006	-1.1635	0.47459	-4.4809	-3.812	-3.2636	FALSE	FALSE	FALSE	FALSE	FALSE	FALSE	TRUE	FALSE	FALSE	FALSE	FALSE	FALSE	FALSE	FALSE
11	LPXN	NP_001137467.1	0	0	-4.5435	-3.40905	-2.658	0.38202	-4.02765	-3.317	-2.999	FALSE	FALSE	FALSE	FALSE	FALSE	FALSE	TRUE	FALSE	FALSE	FALSE	FALSE	FALSE	FALSE	FALSE
19	PPP6R1	NP_055746.3	0.0285419	0.0723485	-5.9285	-3.63395	-2.172	0.688957	-4.62195	-3.548	-2.7985	FALSE	FALSE	FALSE	FALSE	FALSE	FALSE	FALSE	FALSE	FALSE	FALSE	FALSE	FALSE	FALSE	FALSE
15	FEM1B	NP_056137.1	0	0.122403	-5.037	-3.94958	-2.784	0.498831	-4.679	-3.918	-3.3105	FALSE	FALSE	FALSE	FALSE	FALSE	FALSE	FALSE	FALSE	FALSE	FALSE	FALSE	FALSE	FALSE	FALSE
19	ZNF283	NP_862828.1	0.196336	0.0786894	-5.8775	-4.0621	-1.9335	0.85082	-5.44695	-3.705	-3.2125	FALSE	FALSE	FALSE	FALSE	FALSE	FALSE	FALSE	FALSE	FALSE	FALSE	FALSE	FALSE	FALSE	FALSE
7	IQUB	NP_001269784.1	0	0	-4.158	-3.46572	-1.862	0.322355	-3.9005	-3.4695	-3.0495	FALSE	FALSE	FALSE	FALSE	FALSE	FALSE	FALSE	FALSE	FALSE	FALSE	FALSE	FALSE	FALSE	FALSE
10	KLF6	NP_001291.3	0.298064	0.0689937	-5.906	-4.12012	-2.3235	1.04262	-5.5907	-3.804	-2.9183	FALSE	FALSE	FALSE	FALSE	FALSE	FALSE	FALSE	FALSE	FALSE	FALSE	FALSE	FALSE	FALSE	FALSE
17	PIK3R5	NP_001136105.1	0.00913242	0.0337659	-5.2325	-3.64776	-2.5315	0.44179	-4.2525	-3.566	-3.15	FALSE	FALSE	FALSE	FALSE	FALSE	FALSE	FALSE	FALSE	FALSE	FALSE	FALSE	FALSE	FALSE	FALSE
1	UTP11	NP_057121.2	0	0	-4.374	-3.51416	-2.948	0.275081	-3.92605	-3.466	-3.2015	FALSE	FALSE	FALSE	FALSE	FALSE	FALSE	FALSE	FALSE	FALSE	FALSE	FALSE	FALSE	FALSE	FALSE
8	LRRCC1	NP_208325.3	0	0	-4.302	-3.52007	-1.996	0.286499	-3.896	-3.5055	-3.1786	FALSE	FALSE	FALSE	FALSE	FALSE	FALSE	FALSE	FALSE	FALSE	FALSE	FALSE	FALSE	FALSE	FALSE
21	ITSN1	NP_001001132.1	0.00202768	0.0503835	-5.1635	-3.73263	-2.5125	0.463254	-4.429	-3.633	-3.212	FALSE	FALSE	FALSE	FALSE	FALSE	FALSE	TRUE	FALSE	FALSE	FALSE	FALSE	FALSE	FALSE	FALSE
1	H2AC25	NP_254280.1	0.267041	0.0901639	-6.5425	-4.02354	0.7365	1.29351	-5.83765	-3.92975	-2.44505	FALSE	FALSE	FALSE	FALSE	FALSE	FALSE	FALSE	FALSE	FALSE	FALSE	FALSE	FALSE	FALSE	FALSE
17	GRN	NP_002078.1	0	0	-4.126	-3.36229	-2.052	0.343229	-3.8515	-3.338	-2.92895	TRUE	FALSE	FALSE	FALSE	FALSE	FALSE	TRUE	FALSE	FALSE	FALSE	FALSE	FALSE	FALSE	TRUE
16	C16orf74	NP_996850.1	0	0	-2.979	-2.95518	-2.8555	0.0134498	-2.9685	-2.957	-2.942	FALSE	FALSE	FALSE	FALSE	FALSE	FALSE	TRUE	FALSE	FALSE	FALSE	FALSE	FALSE	FALSE	FALSE
12	PARPBP	NP_001306917.1	0	0	-4.517	-3.49807	-2.323	0.343977	-3.951	-3.4875	-3.06855	FALSE	FALSE	FALSE	FALSE	FALSE	FALSE	FALSE	FALSE	FALSE	FALSE	FALSE	FALSE	FALSE	FALSE
3	NRROS	NP_940967.1	0	0.000158053	-4.638	-3.44709	-1.8115	0.54753	-4.276	-3.36525	-2.789	FALSE	FALSE	FALSE	FALSE	FALSE	FALSE	TRUE	FALSE	FALSE	FALSE	TRUE	FALSE	FALSE	TRUE
12	ADCY6	NP_056085.1	0	0.0422923	-5.007	-3.61167	-2.431	0.513339	-4.4065	-3.4955	-3.028	FALSE	FALSE	FALSE	FALSE	FALSE	FALSE	FALSE	FALSE	FALSE	FALSE	FALSE	FALSE	FALSE	FALSE
8	SQLE	NP_003120.2	0	0.0525151	-4.9825	-3.80222	-2.075	0.517142	-4.50265	-3.7805	-3.139	FALSE	FALSE	FALSE	FALSE	FALSE	FALSE	FALSE	FALSE	FALSE	FALSE	FALSE	FALSE	FALSE	FALSE
12	ANKRD52	NP_775866.2	0.116883	0.11641	-6.2685	-4.13006	-2.384	0.663616	-5.135	-4.003	-3.3685	FALSE	FALSE	FALSE	FALSE	FALSE	FALSE	FALSE	FALSE	FALSE	FALSE	FALSE	FALSE	FALSE	FALSE
12	LLPH	NP_115714.1	0	0	-4.348	-3.39294	-2.1235	0.360151	-3.8211	-3.3995	-2.9394	FALSE	FALSE	FALSE	FALSE	FALSE	FALSE	TRUE	FALSE	FALSE	FALSE	FALSE	FALSE	FALSE	FALSE
7	TFEC	NP_036384.1	0	0	-4.489	-3.68523	-1.7505	0.430677	-4.22935	-3.735	-3.09515	FALSE	FALSE	FALSE	FALSE	FALSE	FALSE	TRUE	FALSE	FALSE	FALSE	FALSE	FALSE	FALSE	FALSE
1	KCNN3	NP_002240.3	0.0183193	0.199186	-5.312	-4.12805	-2.866	0.536494	-4.8045	-4.18	-3.363	FALSE	FALSE	FALSE	FALSE	FALSE	FALSE	TRUE	FALSE	FALSE	FALSE	TRUE	FALSE	FALSE	TRUE
2	ATP6V1E2	NP_001304992.1	0	0	-4.48	-3.25991	-2.571	0.401518	-3.823	-3.19925	-2.7855	FALSE	FALSE	FALSE	FALSE	FALSE	FALSE	FALSE	FALSE	FALSE	FALSE	FALSE	FALSE	FALSE	FALSE
12	ABCC9	NP_005682.2	0.00583894	0.142121	-5.2445	-4.13164	-2.219	0.424246	-4.7175	-4.108	-3.593	TRUE	FALSE	FALSE	FALSE	FALSE	FALSE	TRUE	FALSE	FALSE	FALSE	TRUE	FALSE	FALSE	TRUE
1	FCRL5	NP_001182317.1	0.0294712	0.0541462	-5.444	-3.5975	-1.53	0.597492	-4.5175	-3.394	-3.062	FALSE	FALSE	FALSE	FALSE	FALSE	FALSE	FALSE	FALSE	FALSE	FALSE	FALSE	FALSE	FALSE	FALSE
3	ACAA1	NP_001123882.1	0	0	-4.1025	-3.49305	-2.5305	0.271725	-3.8515	-3.49325	-3.14145	FALSE	FALSE	FALSE	FALSE	FALSE	FALSE	FALSE	FALSE	FALSE	FALSE	FALSE	FALSE	FALSE	FALSE
10	LIPK	NP_001073987.1	0	0	-3.9305	-3.4786	-1.8935	0.304371	-3.781	-3.5625	-3.0425	FALSE	FALSE	FALSE	FALSE	FALSE	FALSE	FALSE	FALSE	FALSE	FALSE	FALSE	FALSE	FALSE	FALSE
19	NCCRP1	NP_001001414.1	0	0	-3.836	-3.20454	-2.464	0.233752	-3.5545	-3.169	-2.9275	FALSE	FALSE	FALSE	FALSE	FALSE	FALSE	FALSE	FALSE	FALSE	FALSE	FALSE	FALSE	FALSE	FALSE
1	RIIAD1	NP_001138428.1	0	0	-4.2175	-3.47979	-1.9095	0.387478	-3.9295	-3.52475	-2.9985	FALSE	FALSE	FALSE	FALSE	FALSE	FALSE	FALSE	FALSE	FALSE	FALSE	FALSE	FALSE	FALSE	FALSE
7	GNA12	NP_031379.2	0.0943739	0.105414	-6.0755	-3.75501	-2.4175	0.871939	-5.0244	-3.644	-2.66805	FALSE	FALSE	FALSE	FALSE	FALSE	FALSE	TRUE	FALSE	FALSE	FALSE	FALSE	FALSE	FALSE	FALSE
12	CCNT1	NP_001231.2	0.0277233	0.0828286	-5.7725	-3.75432	-1.988	0.580209	-4.6535	-3.5405	-3.1705	FALSE	FALSE	FALSE	FALSE	FALSE	FALSE	FALSE	FALSE	FALSE	FALSE	FALSE	FALSE	FALSE	FALSE
12	PHC1	NP_004417.2	0	0.0230362	-4.9445	-3.68435	-2.3715	0.395056	-4.2897	-3.592	-3.266	FALSE	FALSE	FALSE	FALSE	FALSE	FALSE	TRUE	FALSE	FALSE	FALSE	TRUE	FALSE	FALSE	TRUE
12	P2RX4	NP_002551.2	0	0	-4.4425	-3.45325	-2.5835	0.329098	-3.918	-3.425	-3.0355	FALSE	FALSE	FALSE	FALSE	FALSE	FALSE	FALSE	FALSE	FALSE	FALSE	FALSE	FALSE	FALSE	FALSE
6	SMPDL3A	NP_006705.1	0	0	-4.297	-3.62354	-2.268	0.378983	-4.0975	-3.665	-3.0927	FALSE	FALSE	FALSE	FALSE	FALSE	FALSE	TRUE	FALSE	FALSE	FALSE	FALSE	FALSE	FALSE	FALSE
1	IL22RA1	NP_067081.2	0	0	-4.547	-3.43072	-1.673	0.376448	-3.885	-3.4655	-2.9258	FALSE	FALSE	FALSE	FALSE	FALSE	FALSE	FALSE	FALSE	FALSE	FALSE	FALSE	FALSE	FALSE	FALSE
16	HBA2	NP_000508.1	0	0.0830827	-4.758	-4.25882	-2.8395	0.302609	-4.6	-4.30475	-3.83395	TRUE	FALSE	FALSE	FALSE	FALSE	FALSE	TRUE	FALSE	FALSE	FALSE	FALSE	FALSE	FALSE	FALSE
12	LPCAT3	NP_005759.4	0	0.00420119	-4.687	-3.67923	-1.8375	0.467011	-4.2916	-3.6865	-3.056	FALSE	FALSE	FALSE	FALSE	FALSE	FALSE	TRUE	FALSE	FALSE	FALSE	FALSE	FALSE	FALSE	FALSE
4	GYPA	NP_002090.4	0	0	-4.066	-3.39415	-2.1595	0.349093	-3.83395	-3.43025	-2.9196	FALSE	FALSE	FALSE	FALSE	FALSE	FALSE	FALSE	FALSE	FALSE	FALSE	FALSE	FALSE	FALSE	FALSE
14	CDKL1	NP_004187.3	0.00102863	0.0178296	-5.2265	-3.56286	-2.7715	0.377012	-4.1284	-3.4255	-3.2195	FALSE	FALSE	FALSE	FALSE	FALSE	FALSE	FALSE	FALSE	FALSE	FALSE	FALSE	FALSE	FALSE	FALSE
7	CDK13	NP_003709.3	0.0454008	0.0624041	-5.672	-3.60032	-2.073	0.639254	-4.6661	-3.392	-2.992	FALSE	FALSE	FALSE	FALSE	FALSE	FALSE	TRUE	FALSE	FALSE	FALSE	TRUE	TRUE	TRUE	TRUE
4	NSD2	NP_579877.1	0.253545	0.0827447	-7.1455	-4.31949	-2.7715	1.13436	-6.2066	-3.948	-3.1454	FALSE	FALSE	FALSE	FALSE	FALSE	FALSE	FALSE	FALSE	FALSE	FALSE	TRUE	TRUE	FALSE	TRUE
12	ARL1	NP_001168.1	0.214075	0.207274	-5.827	-4.42415	-2.04	0.700137	-5.32535	-4.45975	-3.46205	FALSE	FALSE	FALSE	FALSE	FALSE	FALSE	FALSE	FALSE	FALSE	FALSE	FALSE	FALSE	FALSE	FALSE
13	DCUN1D2	NP_001014305.1	0.0226944	0.0550459	-5.7155	-3.62467	-1.845	0.622425	-4.5154	-3.53675	-2.8931	FALSE	FALSE	FALSE	FALSE	FALSE	FALSE	FALSE	FALSE	FALSE	FALSE	FALSE	FALSE	FALSE	FALSE
8	HAS2	NP_005319.1	0.346302	0.175768	-5.93	-4.57725	-2.049	0.786298	-5.5482	-4.6805	-3.4525	FALSE	FALSE	FALSE	FALSE	FALSE	FALSE	FALSE	FALSE	FALSE	FALSE	FALSE	FALSE	FALSE	FALSE
3	CNTN6	NP_055276.1	0	0	-4.5585	-3.21764	-2.143	0.41927	-3.8165	-3.1745	-2.7015	FALSE	FALSE	FALSE	FALSE	FALSE	FALSE	TRUE	FALSE	FALSE	TRUE	FALSE	FALSE	FALSE	FALSE
6	TMEM217	NP_660359.2	0	0.0297354	-4.933	-3.56728	-2.352	0.406364	-4.1636	-3.4835	-3.135	FALSE	FALSE	FALSE	FALSE	FALSE	FALSE	FALSE	FALSE	FALSE	FALSE	FALSE	FALSE	FALSE	FALSE
11	GATD1	NP_872418.1	0.00177981	0.057971	-5.1135	-3.38127	-1.7775	0.736977	-4.4382	-3.31	-2.4541	FALSE	FALSE	FALSE	FALSE	FALSE	FALSE	FALSE	FALSE	FALSE	FALSE	FALSE	FALSE	FALSE	FALSE
19	CEACAM4	NP_001808.2	0	0.00487329	-4.8155	-3.331	-1.527	0.562954	-4.0815	-3.3195	-2.6078	FALSE	FALSE	FALSE	FALSE	FALSE	FALSE	FALSE	FALSE	FALSE	FALSE	FALSE	FALSE	FALSE	FALSE
20	TP53INP2	NP_067025.1	0	0.0036049	-4.779	-3.16337	-2.0945	0.416437	-3.689	-3.155	-2.6425	FALSE	FALSE	FALSE	FALSE	FALSE	FALSE	FALSE	FALSE	FALSE	FALSE	FALSE	FALSE	FALSE	FALSE
2	COL3A1	NP_000081.2	0.218249	0.0553285	-5.8745	-4.03377	-2.9385	0.833656	-5.3875	-3.707	-3.171	TRUE	FALSE	TRUE	FALSE	TRUE	FALSE	FALSE	FALSE	FALSE	FALSE	FALSE	FALSE	FALSE	FALSE
7	FEZF1	NP_001019784.2	0.155817	0.0695983	-5.8785	-4.01259	-2.4515	0.778724	-5.3815	-3.7195	-3.23975	FALSE	FALSE	FALSE	FALSE	FALSE	FALSE	FALSE	FALSE	FALSE	FALSE	TRUE	FALSE	FALSE	TRUE
9	TJP2	NP_004808.2	0	0	-4.4615	-3.28646	-2.4515	0.285478	-3.7045	-3.232	-2.9681	FALSE	TRUE	FALSE	FALSE	FALSE	FALSE	TRUE	FALSE	FALSE	FALSE	FALSE	FALSE	FALSE	FALSE
19	ZNF223	NP_037493.3	0.00464396	0.0662195	-5.2	-3.69167	-2.643	0.522506	-4.4987	-3.54025	-3.13865	FALSE	FALSE	FALSE	TRUE	FALSE	FALSE	FALSE	FALSE	FALSE	FALSE	FALSE	FALSE	FALSE	FALSE
16	ITGAM	NP_000623.2	0	0	-4.4825	-3.55029	-2.572	0.414048	-4.116	-3.53	-3.0025	FALSE	FALSE	FALSE	FALSE	FALSE	FALSE	TRUE	FALSE	FALSE	FALSE	FALSE	FALSE	FALSE	FALSE
12	DCD	NP_001287783.1	0	0	-4.1315	-3.33556	-2.489	0.224327	-3.61865	-3.3265	-3.07895	FALSE	FALSE	FALSE	FALSE	FALSE	FALSE	FALSE	FALSE	FALSE	FALSE	FALSE	FALSE	FALSE	FALSE
2	REG1B	NP_006498.1	0.0129555	0.0404858	-5.477	-3.42415	-2.4655	0.610674	-4.38105	-3.2635	-2.75645	FALSE	FALSE	FALSE	FALSE	FALSE	FALSE	FALSE	FALSE	FALSE	FALSE	FALSE	FALSE	FALSE	FALSE
1	GPR161	NP_001254538.1	0	0	-4.5645	-3.60855	-2.5235	0.3672	-4.1205	-3.57	-3.1432	FALSE	FALSE	FALSE	FALSE	FALSE	FALSE	TRUE	FALSE	FALSE	FALSE	FALSE	FALSE	FALSE	FALSE
4	UGT2B28	NP_444267.1	0	0.0222633	-5.0355	-3.34416	1.1925	0.613585	-4.1952	-3.2875	-2.6258	FALSE	FALSE	FALSE	TRUE	FALSE	FALSE	FALSE	FALSE	FALSE	FALSE	FALSE	FALSE	FALSE	FALSE
X	TSR2	NP_477511.1	0.224854	0.0953216	-7.0395	-4.35058	-2.5345	0.954859	-5.8539	-4.102	-3.334	FALSE	FALSE	FALSE	FALSE	FALSE	FALSE	FALSE	FALSE	FALSE	FALSE	FALSE	FALSE	FALSE	FALSE
7	CDHR3	NP_689963.2	0	0	-4.092	-3.38341	-2.001	0.271279	-3.7455	-3.3815	-3.0405	FALSE	FALSE	FALSE	FALSE	FALSE	FALSE	TRUE	FALSE	FALSE	FALSE	FALSE	FALSE	FALSE	FALSE
10	ABCC2	NP_000383.2	0	0.0012945	-4.739	-3.44351	-1.5915	0.414866	-4.0435	-3.3845	-2.972	FALSE	TRUE	FALSE	FALSE	FALSE	FALSE	TRUE	FALSE	FALSE	FALSE	FALSE	FALSE	FALSE	FALSE
17	CCL5	NP_002976.2	0	0	-4.235	-3.31009	-1.608	0.54015	-4.0433	-3.3175	-2.6045	FALSE	FALSE	FALSE	FALSE	FALSE	FALSE	FALSE	FALSE	FALSE	FALSE	FALSE	FALSE	FALSE	FALSE
20	RBBP9	NP_006597.2	0	0	-4.295	-3.42237	-2.3555	0.318607	-3.84865	-3.40275	-3.0265	FALSE	FALSE	FALSE	FALSE	FALSE	FALSE	FALSE	FALSE	FALSE	FALSE	FALSE	FALSE	FALSE	FALSE
19	OR7A17	NP_112163.1	0.193097	0.0781708	-6.51	-3.80943	-0.949	1.19372	-5.6973	-3.567	-2.4315	FALSE	FALSE	FALSE	FALSE	FALSE	FALSE	FALSE	FALSE	FALSE	FALSE	FALSE	FALSE	FALSE	FALSE
11	CTSC	NP_680475.1	0	0	-3.555	-3.15123	-2.681	0.138189	-3.3325	-3.148	-2.97925	FALSE	TRUE	FALSE	FALSE	FALSE	FALSE	FALSE	FALSE	FALSE	FALSE	FALSE	FALSE	FALSE	FALSE
3	RUVBL1	NP_003698.1	0.191136	0.214104	-6.451	-4.33799	-2.5965	0.748494	-5.27	-4.41025	-3.2345	FALSE	FALSE	FALSE	FALSE	FALSE	FALSE	FALSE	FALSE	FALSE	FALSE	FALSE	FALSE	FALSE	FALSE
12	DENR	NP_003668.2	0.180367	0.186872	-5.9085	-4.44365	-2.8085	0.589693	-5.28185	-4.38175	-3.70855	FALSE	FALSE	FALSE	FALSE	FALSE	FALSE	FALSE	FALSE	FALSE	FALSE	FALSE	FALSE	FALSE	FALSE
5	RARS1	NP_002878.2	0	0.000929887	-4.7065	-3.56868	-2.209	0.435394	-4.15335	-3.5705	-2.99465	FALSE	FALSE	FALSE	FALSE	FALSE	FALSE	FALSE	FALSE	FALSE	FALSE	TRUE	FALSE	FALSE	TRUE
16	CDIP1	NP_001185983.1	0	0.0112782	-4.7915	-3.43029	-2.376	0.439524	-4.05005	-3.35475	-2.931	FALSE	FALSE	FALSE	FALSE	FALSE	FALSE	FALSE	FALSE	FALSE	FALSE	FALSE	FALSE	FALSE	FALSE
2	SIX3	NP_005404.1	0.158883	0.149741	-5.8995	-4.12006	-2.643	0.80514	-5.2769	-4.0505	-3.125	TRUE	FALSE	TRUE	FALSE	FALSE	FALSE	TRUE	FALSE	FALSE	FALSE	TRUE	FALSE	FALSE	TRUE
12	ABCD2	NP_005155.1	0.00236927	0.0621933	-5.2495	-3.80356	-2.611	0.53487	-4.52515	-3.78925	-3.0885	FALSE	FALSE	FALSE	FALSE	FALSE	FALSE	FALSE	FALSE	FALSE	FALSE	FALSE	FALSE	FALSE	FALSE
2	EGR4	NP_001956.4	0	0.000537057	-4.642	-3.19568	-2.603	0.374708	-3.5548	-3.11025	-2.837	FALSE	FALSE	FALSE	FALSE	FALSE	FALSE	FALSE	FALSE	FALSE	FALSE	FALSE	FALSE	FALSE	FALSE
X	RAB40A	NP_543155.2	0.081777	0.0973401	-5.3385	-3.81925	-1.8975	0.660928	-4.97735	-3.528	-3.224	FALSE	FALSE	FALSE	FALSE	FALSE	FALSE	FALSE	FALSE	FALSE	FALSE	FALSE	FALSE	FALSE	FALSE
20	MTG2	NP_056481.1	0	0	-3.9915	-3.23326	-2.4375	0.293001	-3.634	-3.21	-2.85615	FALSE	FALSE	FALSE	FALSE	FALSE	FALSE	FALSE	FALSE	FALSE	FALSE	FALSE	FALSE	FALSE	FALSE
11	SLC22A12	NP_653186.2	0.000295683	0.0345949	-5.0755	-3.44762	-2.1415	0.568663	-4.30675	-3.321	-2.8145	FALSE	TRUE	FALSE	FALSE	FALSE	FALSE	TRUE	FALSE	FALSE	FALSE	FALSE	FALSE	FALSE	FALSE
2	FSHR	NP_000136.2	0	0.000681315	-4.7625	-3.41126	-1.383	0.544328	-4.137	-3.40325	-2.70005	TRUE	TRUE	FALSE	FALSE	FALSE	FALSE	TRUE	FALSE	FALSE	FALSE	FALSE	FALSE	FALSE	FALSE
15	GNB5	NP_057278.2	0.000773994	0.0222523	-5.575	-3.60682	-2.7695	0.474365	-4.2805	-3.553	-3.0085	FALSE	FALSE	FALSE	FALSE	FALSE	FALSE	FALSE	FALSE	FALSE	FALSE	TRUE	FALSE	FALSE	TRUE
2	SP140L	NP_612411.4	0	0	-4.436	-3.57876	-2.195	0.332996	-4.03675	-3.5445	-3.17325	FALSE	FALSE	FALSE	FALSE	FALSE	FALSE	FALSE	FALSE	FALSE	FALSE	FALSE	FALSE	FALSE	FALSE
1	HLX	NP_068777.1	0	0	-4.1745	-3.37589	-2.3285	0.396202	-3.99405	-3.271	-2.9255	FALSE	FALSE	FALSE	FALSE	FALSE	FALSE	TRUE	FALSE	FALSE	FALSE	FALSE	FALSE	FALSE	FALSE
6	PLAGL1	NP_001074420.1	0	0	-4.444	-3.48941	-2.3395	0.338455	-4.0135	-3.408	-3.1181	FALSE	FALSE	FALSE	FALSE	FALSE	FALSE	TRUE	FALSE	FALSE	FALSE	FALSE	FALSE	FALSE	FALSE
14	SYNJ2BP-COX16	NP_001189476.1	0	0	-4.216	-3.74875	-3.182	0.229897	-4.07965	-3.72925	-3.46185	FALSE	FALSE	FALSE	FALSE	FALSE	FALSE	FALSE	FALSE	FALSE	FALSE	FALSE	FALSE	FALSE	FALSE
14	MBIP	NP_057670.2	0	0	-4.288	-3.48793	-2.318	0.307358	-3.92335	-3.4715	-3.1015	FALSE	FALSE	FALSE	FALSE	FALSE	FALSE	FALSE	FALSE	FALSE	FALSE	FALSE	FALSE	FALSE	FALSE
1	PRAMEF10	NP_001034450.3	0.0162029	0.0721868	-5.553	-3.64717	-2.066	0.631309	-4.5601	-3.5615	-2.8929	FALSE	FALSE	FALSE	FALSE	FALSE	FALSE	FALSE	TRUE	FALSE	FALSE	FALSE	FALSE	FALSE	FALSE
1	TACSTD2	NP_002344.2	0	0	-4.329	-3.19593	-1.4005	0.427262	-3.7446	-3.189	-2.6594	FALSE	TRUE	FALSE	FALSE	FALSE	FALSE	FALSE	FALSE	FALSE	FALSE	FALSE	FALSE	FALSE	FALSE
19	ZNF880	NP_001138906.1	0	0.0263916	-4.9155	-3.59804	-2.3485	0.467126	-4.2535	-3.538	-3.034	FALSE	FALSE	FALSE	FALSE	FALSE	FALSE	FALSE	FALSE	FALSE	FALSE	FALSE	FALSE	FALSE	FALSE
2	PLGLB2	NP_002656.1	1	0	-5.6745	-5.59257	-5.4255	0.0424008	-5.63305	-5.6025	-5.5425	FALSE	FALSE	FALSE	FALSE	FALSE	FALSE	FALSE	TRUE	TRUE	FALSE	FALSE	FALSE	FALSE	FALSE
6	HLA-DMA	NP_006111.2	0.0427782	0.126652	-5.446	-3.95711	-2.407	0.615511	-4.823	-3.932	-3.168	FALSE	FALSE	FALSE	FALSE	FALSE	FALSE	TRUE	FALSE	FALSE	FALSE	FALSE	FALSE	FALSE	FALSE
19	ARHGEF1	NP_945353.1	0.0737469	0.0630326	-5.637	-3.73104	-2.257	0.662336	-4.861	-3.5115	-3.108	FALSE	FALSE	FALSE	FALSE	FALSE	FALSE	FALSE	FALSE	FALSE	FALSE	FALSE	FALSE	FALSE	FALSE
6	MRPL2	NP_057034.2	0.0561404	0.054386	-5.523	-3.50501	-2.188	0.716825	-4.68305	-3.169	-2.8905	FALSE	FALSE	FALSE	FALSE	FALSE	FALSE	FALSE	FALSE	FALSE	FALSE	FALSE	FALSE	FALSE	FALSE
17	EIF4A3	NP_055555.1	0.346766	0.178259	-6.574	-4.65554	-1.961	0.837596	-5.7665	-4.676	-3.5158	FALSE	FALSE	FALSE	FALSE	FALSE	FALSE	TRUE	FALSE	FALSE	FALSE	TRUE	FALSE	FALSE	TRUE
12	OAS3	NP_006178.2	0.00556391	0.0345865	-5.464	-3.54836	-2.391	0.500573	-4.2895	-3.418	-3.0215	FALSE	FALSE	FALSE	FALSE	FALSE	FALSE	TRUE	FALSE	FALSE	FALSE	FALSE	FALSE	FALSE	FALSE
17	CDK3	NP_001249.1	0	0.0352686	-4.9805	-3.64226	-2.4135	0.550116	-4.4116	-3.612	-2.9224	FALSE	FALSE	FALSE	FALSE	FALSE	FALSE	FALSE	FALSE	FALSE	FALSE	FALSE	FALSE	FALSE	FALSE
3	OTOL1	NP_001073909.1	0	0	-3.849	-3.37626	-2.069	0.249744	-3.6365	-3.4285	-3.0355	FALSE	FALSE	FALSE	FALSE	FALSE	FALSE	TRUE	FALSE	FALSE	FALSE	FALSE	FALSE	FALSE	FALSE
16	SLC7A6	NP_001070253.1	0.0104542	0.086758	-5.5355	-3.78894	-2.766	0.585894	-4.605	-3.75075	-3.02555	FALSE	FALSE	FALSE	FALSE	FALSE	FALSE	TRUE	FALSE	FALSE	FALSE	FALSE	FALSE	FALSE	FALSE
16	CLEC3A	NP_005743.5	0	0	-3.403	-2.89596	-1.862	0.241277	-3.206	-2.90875	-2.57805	FALSE	FALSE	FALSE	FALSE	FALSE	FALSE	FALSE	FALSE	FALSE	TRUE	FALSE	FALSE	FALSE	FALSE
14	GLRX5	NP_057501.2	0	0	-4.135	-3.16085	-1.821	0.436867	-3.723	-3.17525	-2.5635	FALSE	TRUE	FALSE	FALSE	FALSE	FALSE	TRUE	FALSE	FALSE	FALSE	FALSE	FALSE	FALSE	FALSE
16	DRC7	NP_001276091.1	0	0	-4.366	-3.37245	-2.338	0.284454	-3.7715	-3.341	-3.0365	FALSE	FALSE	FALSE	FALSE	FALSE	FALSE	FALSE	FALSE	FALSE	FALSE	FALSE	FALSE	FALSE	FALSE
9	DNAI1	NP_036276.1	0	0	-4.5355	-3.50064	-2.5605	0.381296	-4.029	-3.4815	-3.006	FALSE	TRUE	FALSE	FALSE	FALSE	FALSE	FALSE	FALSE	FALSE	FALSE	FALSE	FALSE	FALSE	FALSE
6	PLA2G7	NP_005075.3	0	0	-3.8055	-3.32073	-2.1295	0.274924	-3.628	-3.375	-2.9416	TRUE	FALSE	FALSE	FALSE	FALSE	FALSE	TRUE	FALSE	FALSE	FALSE	FALSE	FALSE	FALSE	FALSE
1	SYT2	NP_796376.2	0.000179019	0.105442	-5.091	-3.99207	-1.959	0.509808	-4.62425	-4.04675	-3.2615	FALSE	FALSE	FALSE	FALSE	FALSE	FALSE	FALSE	FALSE	FALSE	FALSE	TRUE	FALSE	FALSE	TRUE
1	KIRREL1	NP_060710.3	0.00635647	0.0512755	-5.3195	-3.66027	-1.6365	0.543399	-4.4296	-3.598	-3.023	FALSE	FALSE	FALSE	FALSE	FALSE	FALSE	FALSE	FALSE	FALSE	FALSE	FALSE	FALSE	FALSE	FALSE
7	OPN1SW	NP_001372054.1	0	0	-4.3975	-3.41442	-1.891	0.418503	-3.9538	-3.438	-2.8385	TRUE	FALSE	FALSE	FALSE	FALSE	FALSE	TRUE	FALSE	FALSE	FALSE	FALSE	FALSE	FALSE	FALSE
16	ERN2	NP_150296.4	0	0.0231651	-4.993	-3.46742	-2.177	0.458111	-4.1414	-3.349	-2.9875	FALSE	FALSE	FALSE	FALSE	FALSE	FALSE	FALSE	FALSE	FALSE	FALSE	FALSE	FALSE	FALSE	FALSE
6	HMGN3	NP_001305816.1	0	0.0474828	-4.996	-3.76714	-2.739	0.476436	-4.41715	-3.718	-3.1571	FALSE	FALSE	FALSE	FALSE	FALSE	FALSE	TRUE	FALSE	FALSE	FALSE	FALSE	FALSE	FALSE	FALSE
15	RNF111	NP_001317260.1	0	0.0224091	-4.8985	-3.43654	-2.3315	0.374033	-3.85855	-3.383	-3.0555	FALSE	FALSE	FALSE	FALSE	FALSE	FALSE	FALSE	FALSE	FALSE	FALSE	FALSE	FALSE	FALSE	FALSE
1	TLR5	NP_003259.2	0	0	-4.525	-3.54591	-1.6825	0.470547	-4.1955	-3.5375	-2.9285	FALSE	FALSE	FALSE	TRUE	FALSE	FALSE	FALSE	FALSE	FALSE	FALSE	FALSE	FALSE	FALSE	FALSE
5	PCDHA13	NP_061727.1	0.00720794	0.0382157	-5.317	-3.49909	-2.0555	0.582071	-4.33625	-3.41275	-2.8105	FALSE	FALSE	FALSE	FALSE	FALSE	FALSE	FALSE	FALSE	FALSE	FALSE	FALSE	FALSE	FALSE	FALSE
15	MAPK6	NP_002739.1	0.028662	0.119594	-5.4965	-3.89028	-2.1555	0.631739	-4.7588	-3.8625	-3.0947	FALSE	FALSE	FALSE	FALSE	FALSE	FALSE	FALSE	FALSE	FALSE	FALSE	FALSE	FALSE	FALSE	FALSE
3	GASK1A	NP_001123380.2	0	0.000250031	-4.673	-3.34063	-2.3635	0.309895	-3.7425	-3.311	-2.9735	FALSE	FALSE	FALSE	FALSE	FALSE	FALSE	FALSE	FALSE	FALSE	FALSE	FALSE	FALSE	FALSE	FALSE
19	ECSIT	NP_057665.2	0	0	-4.4255	-3.29737	-1.9895	0.304824	-3.6665	-3.287	-2.917	FALSE	FALSE	FALSE	FALSE	FALSE	FALSE	FALSE	FALSE	FALSE	FALSE	FALSE	FALSE	FALSE	FALSE
19	A1BG	NP_570602.2	0	0.000134953	-4.622	-3.30889	-2.4165	0.34896	-3.7745	-3.2435	-2.9435	FALSE	FALSE	FALSE	FALSE	FALSE	FALSE	FALSE	FALSE	FALSE	FALSE	FALSE	FALSE	FALSE	FALSE
4	PDLIM5	NP_001243358.1	0.580011	0.258373	-6.19	-5.11934	-2.8145	0.528734	-5.755	-5.1675	-4.4315	FALSE	FALSE	FALSE	FALSE	FALSE	FALSE	TRUE	TRUE	FALSE	FALSE	FALSE	FALSE	FALSE	FALSE
10	CYP26C1	NP_899230.2	0	0	-4.2665	-3.19692	-2.0705	0.384019	-3.728	-3.177	-2.7099	FALSE	FALSE	FALSE	FALSE	FALSE	FALSE	TRUE	FALSE	FALSE	FALSE	FALSE	FALSE	FALSE	FALSE
17	UBE2G1	NP_003333.1	0.527397	0.148522	-6.923	-5.05213	-2.413	1.01523	-6.33405	-5.15475	-3.62425	FALSE	FALSE	FALSE	FALSE	FALSE	FALSE	FALSE	FALSE	FALSE	FALSE	FALSE	FALSE	FALSE	FALSE
3	LSAMP	NP_001305844.1	0.171097	0.114362	-6.031	-4.12557	-2.7495	0.831155	-5.3845	-4.0115	-3.0975	FALSE	FALSE	FALSE	FALSE	FALSE	FALSE	TRUE	FALSE	FALSE	FALSE	FALSE	FALSE	FALSE	FALSE
1	HTR1D	NP_000855.1	0	0.000168152	-4.635	-3.49052	-2	0.492662	-4.174	-3.4675	-2.8645	FALSE	FALSE	FALSE	FALSE	FALSE	FALSE	TRUE	FALSE	FALSE	FALSE	FALSE	FALSE	FALSE	FALSE
14	OR4E2	NP_001001912.2	0.0119068	0.0528041	-5.49	-3.31245	-1.9875	0.734267	-4.4431	-3.1655	-2.4779	FALSE	FALSE	FALSE	FALSE	FALSE	FALSE	FALSE	FALSE	FALSE	FALSE	FALSE	FALSE	FALSE	FALSE
2	PDE1A	NP_005010.2	0.00457064	0.0531856	-5.2735	-3.66681	-2.83	0.527992	-4.43755	-3.583	-3.043	FALSE	FALSE	FALSE	FALSE	FALSE	FALSE	TRUE	FALSE	FALSE	FALSE	FALSE	FALSE	FALSE	FALSE
17	KRTAP3-3	NP_149441.1	0	0	-4.244	-3.48343	-2.282	0.289118	-3.8382	-3.5045	-3.1055	FALSE	FALSE	FALSE	FALSE	FALSE	FALSE	FALSE	FALSE	FALSE	FALSE	FALSE	FALSE	FALSE	FALSE
18	CDH7	NP_004352.2	0.00642553	0.0615118	-5.305	-3.64966	-2.5265	0.591757	-4.495	-3.5835	-2.9095	FALSE	FALSE	FALSE	FALSE	FALSE	FALSE	FALSE	FALSE	FALSE	FALSE	FALSE	FALSE	FALSE	FALSE
22	YDJC	NP_001017964.1	0	0	-4.167	-3.29378	-2.376	0.303685	-3.7345	-3.2595	-2.926	FALSE	FALSE	FALSE	FALSE	FALSE	FALSE	TRUE	FALSE	FALSE	FALSE	FALSE	FALSE	FALSE	FALSE
7	KRIT1	NP_919438.1	0	0.00519006	-4.88	-3.53599	-2.2	0.317706	-3.975	-3.4845	-3.19595	TRUE	FALSE	FALSE	FALSE	FALSE	FALSE	TRUE	FALSE	FALSE	FALSE	TRUE	FALSE	FALSE	TRUE
8	MYOM2	NP_003961.3	0	0	-3.629	-2.86721	-1.945	0.248244	-3.21095	-2.871	-2.559	FALSE	FALSE	FALSE	FALSE	FALSE	FALSE	FALSE	FALSE	FALSE	TRUE	FALSE	FALSE	FALSE	FALSE
2	NEURL3	NP_001272414.1	0	0.00208442	-4.737	-3.43111	-1.9125	0.468335	-4.093	-3.389	-2.86335	FALSE	FALSE	FALSE	FALSE	FALSE	FALSE	FALSE	FALSE	FALSE	FALSE	FALSE	FALSE	FALSE	FALSE
16	MAP1LC3B	NP_073729.1	0	0	-4.5595	-3.45162	-1.8685	0.516727	-4.11285	-3.47175	-2.7225	FALSE	FALSE	FALSE	FALSE	FALSE	FALSE	FALSE	FALSE	FALSE	FALSE	FALSE	FALSE	FALSE	FALSE
4	AMTN	NP_997722.1	0	0	-4.604	-3.53211	-2.922	0.282728	-3.9158	-3.487	-3.2092	FALSE	FALSE	FALSE	FALSE	FALSE	FALSE	FALSE	FALSE	FALSE	FALSE	FALSE	FALSE	FALSE	FALSE
3	TAMM41	NP_001271330.1	0	0.003125	-4.9135	-3.41584	-2.092	0.482739	-4.0941	-3.3495	-2.8175	FALSE	FALSE	FALSE	FALSE	FALSE	FALSE	TRUE	FALSE	FALSE	FALSE	FALSE	FALSE	FALSE	FALSE
1	CEP104	NP_055519.1	0	0.0156472	-5.0365	-3.51151	-2.2795	0.472562	-4.1975	-3.4405	-2.962	FALSE	FALSE	FALSE	FALSE	FALSE	FALSE	TRUE	FALSE	FALSE	FALSE	TRUE	FALSE	FALSE	TRUE
12	GXYLT1	NP_001093120.1	0	0	-4.3755	-3.4234	-2.0885	0.426721	-3.945	-3.4725	-2.7935	FALSE	FALSE	FALSE	FALSE	FALSE	FALSE	TRUE	FALSE	FALSE	FALSE	FALSE	FALSE	FALSE	FALSE
10	ADK	NP_001114.2	0.0349206	0.133835	-5.5155	-3.93242	-1.9585	0.6506	-4.7948	-3.9285	-3.0937	FALSE	FALSE	FALSE	FALSE	FALSE	FALSE	TRUE	FALSE	FALSE	FALSE	TRUE	FALSE	FALSE	TRUE
20	C20orf27	NP_001034229.1	0	0	-3.9245	-3.48054	-2.7495	0.195046	-3.7325	-3.48675	-3.21555	FALSE	FALSE	FALSE	FALSE	FALSE	FALSE	TRUE	FALSE	FALSE	FALSE	FALSE	FALSE	FALSE	FALSE
14	ISCA2	NP_919255.2	0	0	-4.341	-3.82259	-2.54	0.290817	-4.1606	-3.8675	-3.4073	FALSE	FALSE	FALSE	FALSE	FALSE	FALSE	TRUE	FALSE	FALSE	FALSE	FALSE	FALSE	FALSE	FALSE
16	BOLA2-SMG1P6	NP_001307551.1	0.999499	0.000501253	-6.3885	-6.02401	-5.0135	0.226807	-6.285	-6.0665	-5.7165	FALSE	FALSE	FALSE	FALSE	FALSE	FALSE	FALSE	FALSE	TRUE	FALSE	FALSE	FALSE	FALSE	FALSE
16	HAGH	NP_005317.2	0.00253646	0.0243078	-5.2005	-3.27181	-2.163	0.531313	-4.118	-3.025	-2.836	FALSE	FALSE	FALSE	FALSE	FALSE	FALSE	FALSE	FALSE	FALSE	FALSE	FALSE	FALSE	FALSE	FALSE
8	HEY1	NP_036390.3	0.000177809	0.0823257	-5.115	-3.57039	-1.8455	0.696412	-4.566	-3.48175	-2.7045	FALSE	FALSE	FALSE	FALSE	FALSE	FALSE	FALSE	FALSE	FALSE	FALSE	FALSE	FALSE	FALSE	FALSE
13	IPO5	NP_002262.4	0.0733623	0.107458	-5.6405	-3.88369	-2.2805	0.702022	-4.927	-3.77	-3.054	FALSE	FALSE	FALSE	FALSE	FALSE	FALSE	FALSE	FALSE	FALSE	FALSE	FALSE	FALSE	FALSE	FALSE
5	FAM114A2	NP_001304922.1	0	0.00785051	-4.8535	-3.61024	-2.0085	0.451301	-4.235	-3.5665	-3.0415	FALSE	FALSE	FALSE	FALSE	FALSE	FALSE	FALSE	FALSE	FALSE	FALSE	FALSE	FALSE	FALSE	FALSE
16	HP	NP_005134.1	0	0.00263158	-4.6905	-3.54256	-2.1335	0.51076	-4.28155	-3.475	-2.90895	FALSE	FALSE	FALSE	FALSE	FALSE	FALSE	FALSE	FALSE	FALSE	FALSE	FALSE	FALSE	FALSE	FALSE
1	SRM	NP_003123.2	0.0894927	0.195326	-5.5845	-4.13905	-2.2745	0.679992	-5.0215	-4.179	-3.202	FALSE	FALSE	FALSE	FALSE	FALSE	FALSE	FALSE	FALSE	FALSE	FALSE	FALSE	FALSE	FALSE	FALSE
12	EPYC	NP_004941.2	0	0	-3.79	-3.49525	-2.817	0.131705	-3.6564	-3.5075	-3.326	FALSE	FALSE	FALSE	FALSE	FALSE	FALSE	FALSE	FALSE	FALSE	FALSE	FALSE	FALSE	FALSE	FALSE
10	SVIL	NP_003165.2	0	0	-4.376	-3.4867	-2.58	0.287689	-3.8825	-3.4605	-3.1425	FALSE	FALSE	FALSE	FALSE	FALSE	FALSE	TRUE	FALSE	FALSE	FALSE	FALSE	FALSE	FALSE	FALSE
9	OBP2B	NP_001275916.1	0.0330917	0.0639773	-5.4985	-3.73895	-2.1355	0.620973	-4.6027	-3.6625	-3.0195	FALSE	FALSE	FALSE	FALSE	FALSE	FALSE	TRUE	FALSE	FALSE	FALSE	FALSE	FALSE	FALSE	FALSE
8	TMEM74	NP_694560.1	0	0	-3.9685	-3.51304	-2.064	0.219614	-3.765	-3.534	-3.2179	FALSE	FALSE	FALSE	FALSE	FALSE	FALSE	FALSE	FALSE	FALSE	FALSE	FALSE	FALSE	FALSE	FALSE
19	USF2	NP_003358.1	0	0	-4.5075	-3.66478	-2.0425	0.391724	-4.237	-3.628	-3.169	FALSE	FALSE	FALSE	FALSE	FALSE	FALSE	TRUE	FALSE	FALSE	FALSE	FALSE	FALSE	FALSE	FALSE
19	WDR62	NP_001077430.1	0	0.00107778	-4.6445	-3.46433	-2.2785	0.417402	-4.1188	-3.379	-3.0235	FALSE	TRUE	FALSE	FALSE	FALSE	FALSE	FALSE	FALSE	FALSE	FALSE	TRUE	FALSE	FALSE	TRUE
6	SLC17A3	NP_006623.2	0	0	-4.3095	-3.5412	-1.948	0.371457	-4.03505	-3.542	-3.05895	FALSE	FALSE	FALSE	FALSE	FALSE	FALSE	TRUE	FALSE	FALSE	FALSE	FALSE	FALSE	FALSE	FALSE
3	BOC	NP_001288790.1	0	0	-4.365	-3.3527	-1.614	0.30161	-3.804	-3.287	-3.0445	FALSE	FALSE	FALSE	FALSE	FALSE	FALSE	TRUE	FALSE	FALSE	FALSE	FALSE	FALSE	FALSE	FALSE
17	GAA	NP_000143.2	0	0	-3.9685	-3.21992	-2.3355	0.269398	-3.575	-3.2165	-2.867	FALSE	TRUE	FALSE	FALSE	FALSE	FALSE	TRUE	FALSE	FALSE	FALSE	TRUE	FALSE	FALSE	TRUE
13	GTF3A	NP_002088.2	0	0	-4	-3.38577	-2.2105	0.287002	-3.7733	-3.3925	-3.021	FALSE	FALSE	FALSE	FALSE	FALSE	FALSE	FALSE	FALSE	FALSE	FALSE	FALSE	FALSE	FALSE	FALSE
2	DES	NP_001918.3	0.0133971	0.0392344	-5.7575	-3.54736	-2.5555	0.571022	-4.346	-3.453	-2.8845	TRUE	FALSE	FALSE	FALSE	FALSE	FALSE	FALSE	FALSE	FALSE	FALSE	FALSE	FALSE	FALSE	FALSE
19	BCAT2	NP_001181.2	0	0	-4.25	-3.54979	-2.5665	0.356309	-4.0215	-3.5595	-3.068	FALSE	FALSE	FALSE	FALSE	FALSE	FALSE	TRUE	FALSE	FALSE	FALSE	FALSE	FALSE	FALSE	FALSE
11	ACY3	NP_542389.1	0	0	-4.1465	-3.25045	-2.2335	0.33445	-3.7225	-3.22275	-2.83615	FALSE	FALSE	FALSE	FALSE	FALSE	FALSE	TRUE	FALSE	FALSE	FALSE	FALSE	FALSE	FALSE	FALSE
20	OCSTAMP	NP_542452.1	0	0	-4.2595	-3.43932	-1.6485	0.323296	-3.8465	-3.464	-3.02145	FALSE	FALSE	FALSE	FALSE	FALSE	FALSE	FALSE	FALSE	FALSE	FALSE	FALSE	FALSE	FALSE	FALSE
6	CEP85L	NP_001035940.1	0	0	-4.3375	-3.44127	-2.2005	0.353408	-3.9575	-3.395	-3.018	FALSE	FALSE	FALSE	FALSE	FALSE	FALSE	TRUE	FALSE	FALSE	FALSE	TRUE	FALSE	FALSE	TRUE
5	KIF4B	NP_001092763.1	0	0	-4.1825	-3.46577	-2.439	0.246474	-3.8295	-3.442	-3.1677	FALSE	FALSE	FALSE	FALSE	FALSE	FALSE	TRUE	FALSE	FALSE	FALSE	FALSE	FALSE	FALSE	FALSE
7	CRYGN	NP_653328.1	0.0048583	0.0194332	-5.7765	-3.48111	-2.925	0.404549	-4.0777	-3.31475	-3.16345	FALSE	FALSE	FALSE	TRUE	FALSE	FALSE	FALSE	FALSE	FALSE	FALSE	FALSE	FALSE	FALSE	FALSE
11	NLRP10	NP_789791.1	0	0	-4.4105	-3.33357	-2.069	0.380653	-3.924	-3.2715	-2.9025	FALSE	FALSE	FALSE	FALSE	FALSE	FALSE	TRUE	FALSE	FALSE	FALSE	FALSE	FALSE	FALSE	FALSE
X	IL1RAPL1	NP_055086.1	0.317279	0.154419	-6.6865	-4.62279	-2.0535	0.873905	-5.86905	-4.5465	-3.514	FALSE	FALSE	TRUE	FALSE	FALSE	FALSE	TRUE	FALSE	FALSE	FALSE	TRUE	FALSE	FALSE	TRUE
3	DZIP3	NP_055463.1	0	0	-4.2425	-3.52008	-2.5175	0.206956	-3.772	-3.51475	-3.281	FALSE	FALSE	FALSE	FALSE	FALSE	FALSE	TRUE	FALSE	FALSE	FALSE	FALSE	FALSE	FALSE	FALSE
11	CBL	NP_005179.2	0.0156603	0.0791895	-5.3765	-3.7459	-2.4715	0.566085	-4.597	-3.6245	-3.141	TRUE	FALSE	FALSE	FALSE	FALSE	FALSE	TRUE	FALSE	FALSE	FALSE	TRUE	TRUE	TRUE	TRUE
6	H2BC15	NP_003511.1	0.228833	0.140046	-6.578	-4.18378	-1.777	1.01186	-5.5131	-4.2235	-2.7687	FALSE	FALSE	FALSE	FALSE	FALSE	FALSE	FALSE	FALSE	FALSE	FALSE	FALSE	FALSE	FALSE	FALSE
1	DMRTA2	NP_115486.1	0.000477023	0.0831611	-5.085	-3.47012	-2.1205	0.630354	-4.5476	-3.3055	-2.8093	FALSE	FALSE	FALSE	FALSE	FALSE	FALSE	FALSE	FALSE	FALSE	FALSE	FALSE	FALSE	FALSE	FALSE
10	ECD	NP_001129224.1	0	0	-4.462	-3.53858	-2.6115	0.24417	-3.849	-3.5145	-3.2555	FALSE	FALSE	FALSE	FALSE	FALSE	FALSE	FALSE	FALSE	FALSE	FALSE	FALSE	FALSE	FALSE	FALSE
12	GSG1	NP_001193771.1	0	0	-3.92	-3.39973	-0.862	0.46255	-3.8436	-3.478	-2.7872	FALSE	FALSE	FALSE	FALSE	FALSE	FALSE	FALSE	FALSE	FALSE	FALSE	FALSE	FALSE	FALSE	FALSE
12	IL26	NP_060872.1	0	0	-4.566	-3.45919	-2.364	0.250339	-3.76265	-3.4445	-3.1621	FALSE	FALSE	FALSE	FALSE	FALSE	FALSE	FALSE	FALSE	FALSE	FALSE	FALSE	FALSE	FALSE	FALSE
14	LIN52	NP_001019845.2	0	0	-4.333	-3.71145	-2.558	0.301103	-4.08255	-3.73725	-3.2936	FALSE	FALSE	FALSE	FALSE	FALSE	FALSE	FALSE	FALSE	FALSE	FALSE	FALSE	FALSE	FALSE	FALSE
X	SSX7	NP_775494.1	0	0	-4.5145	-3.4024	-1.5975	0.454485	-4.07385	-3.347	-2.85665	FALSE	FALSE	FALSE	FALSE	FALSE	FALSE	FALSE	FALSE	FALSE	FALSE	FALSE	FALSE	FALSE	FALSE
17	BRCA1	NP_009225.1	0	0	-4.506	-3.54101	-2.399	0.286584	-3.928	-3.525	-3.192	TRUE	FALSE	TRUE	FALSE	TRUE	TRUE	TRUE	FALSE	FALSE	FALSE	TRUE	FALSE	FALSE	TRUE
17	PSMC3IP	NP_057640.1	0	0.0408216	-4.8375	-3.63567	-2.403	0.570018	-4.4331	-3.6245	-2.8647	FALSE	FALSE	FALSE	FALSE	FALSE	FALSE	FALSE	FALSE	FALSE	FALSE	FALSE	FALSE	FALSE	FALSE
19	GSK3A	NP_063937.2	0.0920255	0.194737	-5.642	-4.21921	-2.1825	0.616347	-5.03555	-4.22775	-3.40195	FALSE	FALSE	FALSE	FALSE	FALSE	FALSE	FALSE	FALSE	FALSE	FALSE	FALSE	FALSE	FALSE	FALSE
11	KLC2	NP_001128247.1	0.0683594	0.082134	-6.1195	-3.81591	-2.958	0.69054	-4.8535	-3.657	-3.08	FALSE	FALSE	FALSE	FALSE	FALSE	FALSE	FALSE	FALSE	FALSE	FALSE	FALSE	FALSE	FALSE	FALSE
5	SLC12A7	NP_006589.2	0	0.0235152	-4.9675	-3.47482	-1.651	0.570016	-4.301	-3.3965	-2.7858	FALSE	FALSE	FALSE	FALSE	FALSE	FALSE	TRUE	FALSE	FALSE	FALSE	FALSE	FALSE	FALSE	FALSE
1	ARHGEF11	NP_055599.1	0	0.0281891	-4.916	-3.61649	-2.1845	0.427091	-4.276	-3.5445	-3.138	FALSE	FALSE	FALSE	FALSE	FALSE	FALSE	TRUE	FALSE	FALSE	FALSE	FALSE	FALSE	FALSE	FALSE
7	STRIP2	NP_065755.1	0	0	-4.2545	-3.5718	-2.654	0.230568	-3.89	-3.55675	-3.29395	FALSE	FALSE	FALSE	FALSE	FALSE	FALSE	FALSE	FALSE	FALSE	FALSE	FALSE	FALSE	FALSE	FALSE
5	SCGB3A2	NP_473364.1	0	0	-4.1715	-3.3706	-1.8985	0.349085	-3.8167	-3.3865	-2.9029	FALSE	FALSE	FALSE	FALSE	FALSE	FALSE	FALSE	FALSE	FALSE	FALSE	FALSE	FALSE	FALSE	FALSE
2	MYO7B	NP_001073996.1	0	0	-4.5515	-3.34728	-2.2295	0.374795	-3.928	-3.267	-2.926	FALSE	FALSE	FALSE	FALSE	FALSE	FALSE	TRUE	FALSE	FALSE	FALSE	FALSE	FALSE	FALSE	FALSE
16	PABPN1L	NP_001073956.2	0	0	-4.0375	-3.23041	-1.727	0.392516	-3.76035	-3.2135	-2.73965	FALSE	FALSE	FALSE	FALSE	FALSE	FALSE	FALSE	FALSE	FALSE	FALSE	FALSE	FALSE	FALSE	FALSE
1	IRF6	NP_006138.1	0.227742	0.125307	-7.4285	-4.29242	-2.4295	0.977805	-5.676	-4.15925	-3.1415	TRUE	FALSE	TRUE	FALSE	FALSE	FALSE	TRUE	FALSE	FALSE	FALSE	TRUE	FALSE	FALSE	TRUE
14	SLC24A4	NP_705932.2	0.000193498	0.0474071	-5.0875	-3.5189	-2.118	0.582605	-4.41275	-3.41	-2.84725	FALSE	FALSE	FALSE	FALSE	FALSE	FALSE	TRUE	FALSE	FALSE	FALSE	TRUE	FALSE	FALSE	TRUE
9	FRMPD1	NP_055722.2	0	0	-4.3265	-3.41577	-2.1155	0.209141	-3.6445	-3.4305	-3.1635	FALSE	FALSE	FALSE	FALSE	FALSE	FALSE	FALSE	FALSE	FALSE	FALSE	FALSE	FALSE	FALSE	FALSE
17	LRRC37A	NP_055649.4	0.998297	0.00146483	-8.1965	-6.81787	-4.466	0.521619	-7.527	-6.797	-6.178	FALSE	FALSE	FALSE	FALSE	FALSE	FALSE	TRUE	TRUE	TRUE	FALSE	FALSE	FALSE	FALSE	FALSE
11	CLP1	NP_006822.1	0	0.00583386	-4.698	-3.71533	-2.7525	0.357931	-4.2305	-3.6635	-3.284	FALSE	FALSE	FALSE	FALSE	FALSE	FALSE	FALSE	FALSE	FALSE	FALSE	TRUE	FALSE	FALSE	TRUE
9	RAPGEF1	NP_005303.2	0.0648629	0.0800064	-5.7635	-3.8691	-2.444	0.612958	-4.85975	-3.7245	-3.208	FALSE	FALSE	FALSE	FALSE	FALSE	FALSE	FALSE	FALSE	FALSE	FALSE	FALSE	FALSE	FALSE	FALSE
3	QRICH1	NP_001307509.1	0	0	-4.521	-3.84246	-2.4875	0.320203	-4.269	-3.8505	-3.4155	FALSE	FALSE	FALSE	FALSE	FALSE	FALSE	TRUE	FALSE	FALSE	FALSE	TRUE	TRUE	FALSE	TRUE
8	SCRIB	NP_874365.3	0	0.0048935	-4.916	-3.17442	-2.179	0.455502	-3.884	-3.0465	-2.7195	FALSE	FALSE	FALSE	FALSE	FALSE	FALSE	FALSE	FALSE	FALSE	TRUE	TRUE	FALSE	FALSE	TRUE
17	MED1	NP_004765.2	0	0	-4.086	-3.63748	-2.22	0.184365	-3.855	-3.651	-3.411	FALSE	FALSE	FALSE	FALSE	FALSE	FALSE	TRUE	FALSE	FALSE	FALSE	FALSE	FALSE	FALSE	FALSE
7	CYP3A43	NP_073731.1	0	0.00560828	-4.771	-3.5919	-1.544	0.524237	-4.28195	-3.6165	-2.89255	FALSE	FALSE	FALSE	FALSE	FALSE	FALSE	TRUE	FALSE	FALSE	FALSE	FALSE	FALSE	FALSE	FALSE
1	ARNT	NP_001659.1	0	0.0333369	-4.934	-3.87248	-2.2495	0.465764	-4.4611	-3.922	-3.2164	FALSE	FALSE	FALSE	FALSE	FALSE	FALSE	FALSE	FALSE	FALSE	FALSE	FALSE	FALSE	FALSE	FALSE
20	ASIP	NP_001663.2	0	0	-4.186	-3.59504	-2.3835	0.246937	-3.9243	-3.5915	-3.294	FALSE	FALSE	FALSE	FALSE	FALSE	FALSE	FALSE	FALSE	FALSE	FALSE	FALSE	FALSE	FALSE	FALSE
11	HPS5	NP_852608.1	0	0.0116592	-4.998	-3.5426	-2.2965	0.329064	-3.899	-3.5405	-3.1415	FALSE	TRUE	FALSE	FALSE	FALSE	FALSE	TRUE	FALSE	FALSE	FALSE	FALSE	FALSE	FALSE	FALSE
9	TMEM250	NP_690046.3	0	0	-4.3625	-3.19665	-2.442	0.194308	-3.4255	-3.179	-2.993	FALSE	FALSE	FALSE	FALSE	FALSE	FALSE	FALSE	FALSE	FALSE	FALSE	FALSE	FALSE	FALSE	FALSE
12	RITA1	NP_001273144.1	0	0	-4.135	-3.44977	-2.354	0.338918	-3.819	-3.52	-2.9275	FALSE	FALSE	FALSE	FALSE	FALSE	FALSE	FALSE	FALSE	FALSE	FALSE	FALSE	FALSE	FALSE	FALSE
8	TNFRSF10B	NP_671716.2	0	0	-4.5055	-3.49368	-2.21	0.46525	-4.1468	-3.491	-2.8759	FALSE	FALSE	FALSE	FALSE	FALSE	FALSE	FALSE	FALSE	FALSE	FALSE	FALSE	FALSE	FALSE	FALSE
19	ZNF350	NP_067645.3	0	0.00913962	-4.7505	-3.65543	-2.45	0.446143	-4.29625	-3.595	-3.1105	FALSE	FALSE	FALSE	FALSE	FALSE	FALSE	FALSE	FALSE	FALSE	FALSE	FALSE	FALSE	FALSE	FALSE
9	RECK	NP_066934.1	0	0	-4.232	-3.63615	-1.7885	0.339542	-4.035	-3.68	-3.148	FALSE	FALSE	FALSE	FALSE	FALSE	FALSE	TRUE	FALSE	FALSE	FALSE	FALSE	FALSE	FALSE	FALSE
X	SPANXD	NP_115793.1	0	0	-3.9195	-3.05396	-1.6365	0.34665	-3.43335	-3.0875	-2.60655	FALSE	FALSE	FALSE	FALSE	FALSE	FALSE	FALSE	FALSE	FALSE	FALSE	FALSE	FALSE	FALSE	FALSE
14	COQ6	NP_872282.1	0	0.00161943	-4.657	-3.56747	-2.0815	0.488948	-4.252	-3.5345	-2.947	FALSE	FALSE	FALSE	FALSE	FALSE	FALSE	FALSE	FALSE	FALSE	FALSE	FALSE	FALSE	FALSE	FALSE
10	FUT11	NP_775811.2	0	0	-4.202	-3.18719	-2.033	0.357491	-3.683	-3.15	-2.74545	FALSE	FALSE	FALSE	FALSE	FALSE	FALSE	FALSE	FALSE	FALSE	FALSE	FALSE	FALSE	FALSE	FALSE
4	FGA	NP_068657.1	0	0	-4.3315	-3.46065	-2.004	0.308716	-3.884	-3.4355	-3.10575	TRUE	TRUE	FALSE	FALSE	FALSE	FALSE	TRUE	FALSE	FALSE	FALSE	FALSE	FALSE	FALSE	FALSE
12	C12orf50	NP_689802.1	0	0	-4.3265	-3.46846	-2.2965	0.286337	-3.8533	-3.454	-3.1237	FALSE	FALSE	FALSE	FALSE	FALSE	FALSE	FALSE	FALSE	FALSE	FALSE	FALSE	FALSE	FALSE	FALSE
16	NECAB2	NP_061938.2	0	0	-4.459	-2.83233	-1.5185	0.5234	-3.6414	-2.657	-2.3245	FALSE	FALSE	FALSE	FALSE	FALSE	FALSE	FALSE	FALSE	FALSE	TRUE	FALSE	FALSE	FALSE	FALSE
11	PRPF19	NP_055317.1	0.352235	0.126916	-6.751	-4.57915	-2.47	1.05454	-6.0491	-4.5375	-3.164	FALSE	FALSE	FALSE	FALSE	FALSE	FALSE	FALSE	FALSE	FALSE	FALSE	FALSE	FALSE	FALSE	FALSE
1	PIAS3	NP_006090.2	0.00726712	0.0378771	-5.6665	-3.64612	-2.007	0.53478	-4.3819	-3.5985	-2.98655	FALSE	FALSE	FALSE	FALSE	FALSE	FALSE	FALSE	FALSE	FALSE	FALSE	FALSE	FALSE	FALSE	FALSE
16	PRRT2	NP_001243371.1	0	0	-4.165	-3.28513	-2.32	0.314906	-3.7845	-3.2375	-2.931	FALSE	FALSE	FALSE	FALSE	FALSE	FALSE	FALSE	FALSE	FALSE	FALSE	TRUE	FALSE	FALSE	TRUE
11	TMEM138	NP_057548.1	0	0	-4.393	-3.56401	-2.3615	0.341144	-4.0519	-3.5665	-3.1161	FALSE	FALSE	FALSE	FALSE	FALSE	FALSE	FALSE	FALSE	FALSE	FALSE	FALSE	FALSE	FALSE	FALSE
2	THSD7B	NP_001303278.1	0	0	-3.872	-3.47175	-1.5205	0.255099	-3.8045	-3.4805	-3.144	FALSE	FALSE	FALSE	FALSE	FALSE	FALSE	TRUE	FALSE	FALSE	FALSE	FALSE	FALSE	FALSE	FALSE
19	APC2	NP_005874.1	0	0	-4.011	-3.36167	-2.262	0.324477	-3.7045	-3.446	-2.8816	FALSE	FALSE	FALSE	FALSE	FALSE	FALSE	FALSE	FALSE	FALSE	FALSE	TRUE	FALSE	FALSE	TRUE
9	MLANA	NP_005502.1	0	0	-3.8235	-3.41658	-2.2965	0.217813	-3.677	-3.4295	-3.1326	FALSE	FALSE	FALSE	TRUE	FALSE	FALSE	FALSE	FALSE	FALSE	FALSE	FALSE	FALSE	FALSE	FALSE
6	RNF144B	NP_877434.2	0	0.0137506	-4.726	-3.58663	-2.044	0.543494	-4.35565	-3.565	-2.8762	FALSE	FALSE	FALSE	FALSE	FALSE	FALSE	TRUE	FALSE	FALSE	FALSE	FALSE	FALSE	FALSE	FALSE
12	DEPDC4	NP_001374130.1	0	0.0143149	-4.845	-3.57454	-1.032	0.453388	-4.1915	-3.542	-3.0235	FALSE	FALSE	FALSE	FALSE	FALSE	FALSE	FALSE	FALSE	FALSE	FALSE	FALSE	FALSE	FALSE	FALSE
15	FES	NP_001996.1	0	0.0424932	-4.9835	-3.60262	-2.443	0.539867	-4.403	-3.5235	-2.9461	FALSE	FALSE	FALSE	FALSE	FALSE	FALSE	TRUE	FALSE	FALSE	FALSE	FALSE	FALSE	FALSE	FALSE
11	OR8H2	NP_001005200.1	0.0846906	0.0771473	-6.1015	-3.49865	0.1395	0.951249	-4.9565	-3.284	-2.5415	FALSE	FALSE	FALSE	FALSE	FALSE	FALSE	FALSE	FALSE	FALSE	FALSE	FALSE	FALSE	FALSE	FALSE
16	IL34	NP_689669.2	0	0	-4.486	-3.22381	-1.7095	0.318938	-3.58625	-3.24025	-2.8325	FALSE	FALSE	FALSE	FALSE	FALSE	FALSE	FALSE	FALSE	FALSE	FALSE	FALSE	FALSE	FALSE	FALSE
20	RALGAPB	NP_065069.1	0	0	-4.5625	-3.70847	-2.3375	0.288874	-4.1168	-3.6885	-3.3465	FALSE	FALSE	FALSE	FALSE	FALSE	FALSE	FALSE	FALSE	FALSE	FALSE	FALSE	FALSE	FALSE	FALSE
3	RPL32	NP_000985.1	0.382206	0.109858	-7.8555	-4.55933	-0.7215	1.41354	-6.481	-4.58975	-2.6885	FALSE	FALSE	FALSE	FALSE	FALSE	FALSE	FALSE	FALSE	FALSE	FALSE	FALSE	FALSE	FALSE	FALSE
22	BRD1	NP_001291737.1	0.0827319	0.0630757	-6.247	-3.70826	-1.588	0.76945	-4.9192	-3.384	-3.091	FALSE	FALSE	FALSE	FALSE	FALSE	FALSE	TRUE	FALSE	FALSE	FALSE	FALSE	FALSE	FALSE	FALSE
2	TRAF3IP1	NP_056465.2	0	0	-4.1785	-3.41129	-2.237	0.344919	-3.8635	-3.43	-2.933	FALSE	FALSE	FALSE	FALSE	FALSE	FALSE	TRUE	FALSE	FALSE	FALSE	FALSE	FALSE	FALSE	FALSE
9	COL27A1	NP_116277.2	0	0	-4.1755	-3.39437	-2.3305	0.34698	-3.956	-3.3255	-2.9935	FALSE	FALSE	FALSE	FALSE	FALSE	FALSE	TRUE	FALSE	FALSE	FALSE	TRUE	FALSE	FALSE	TRUE
14	PSEN1	NP_000012.1	0.262897	0.132751	-6.1215	-4.27117	-2.2885	0.928327	-5.527	-4.26625	-3.008	TRUE	TRUE	FALSE	FALSE	FALSE	FALSE	FALSE	FALSE	FALSE	FALSE	FALSE	FALSE	FALSE	FALSE
14	CEBPE	NP_001796.2	0	0	-3.7975	-3.23326	-2.528	0.224826	-3.59855	-3.1895	-2.98345	FALSE	TRUE	FALSE	FALSE	FALSE	FALSE	TRUE	FALSE	FALSE	FALSE	FALSE	FALSE	FALSE	FALSE
12	PDE1B	NP_000915.1	0.0677851	0.122987	-5.8305	-3.96878	-2.531	0.665858	-4.915	-3.887	-3.1335	FALSE	FALSE	FALSE	FALSE	FALSE	FALSE	FALSE	FALSE	FALSE	FALSE	FALSE	FALSE	FALSE	FALSE
9	PSMB7	NP_002790.1	0.146635	0.169154	-5.6955	-4.15707	-2.0795	0.77567	-5.2006	-4.166	-3.1114	FALSE	FALSE	FALSE	FALSE	FALSE	FALSE	TRUE	FALSE	FALSE	FALSE	FALSE	FALSE	FALSE	FALSE
16	SHISA9	NP_001138676.2	0.0346332	0.058222	-5.7225	-3.50622	-2.1895	0.674499	-4.573	-3.3015	-2.829	FALSE	FALSE	FALSE	FALSE	FALSE	FALSE	TRUE	FALSE	FALSE	FALSE	FALSE	FALSE	FALSE	FALSE
8	SLC25A37	NP_057696.2	0.0464822	0.115572	-5.507	-3.69912	-1.8245	0.786284	-4.8133	-3.615	-2.7015	FALSE	FALSE	FALSE	FALSE	FALSE	FALSE	TRUE	FALSE	FALSE	FALSE	FALSE	FALSE	FALSE	FALSE
17	RNFT1	NP_057209.3	0	0.0429293	-4.9525	-3.69429	-1.5275	0.51177	-4.3995	-3.6445	-3.0625	FALSE	FALSE	FALSE	FALSE	FALSE	FALSE	FALSE	FALSE	FALSE	FALSE	FALSE	FALSE	FALSE	FALSE
X	PHEX	NP_000435.3	0.129648	0.129889	-6.1965	-4.16827	-2.8255	0.69495	-5.19075	-4.054	-3.339	FALSE	FALSE	TRUE	FALSE	FALSE	FALSE	TRUE	FALSE	FALSE	FALSE	FALSE	FALSE	FALSE	FALSE
17	CD300A	NP_009192.2	0	0	-4.5005	-3.61329	-2.3665	0.453178	-4.2485	-3.5945	-3.0095	FALSE	FALSE	FALSE	FALSE	FALSE	FALSE	TRUE	FALSE	FALSE	FALSE	FALSE	FALSE	FALSE	FALSE
21	POTED	NP_778146.2	0.0308657	0.176217	-5.195	-4.19676	-1.494	0.449931	-4.8775	-4.1295	-3.68455	FALSE	FALSE	FALSE	FALSE	FALSE	FALSE	FALSE	TRUE	FALSE	FALSE	FALSE	FALSE	FALSE	FALSE
6	XPO5	NP_065801.1	0	0.0246435	-4.8345	-3.82095	-2.8895	0.352579	-4.2785	-3.821	-3.365	FALSE	FALSE	FALSE	FALSE	FALSE	FALSE	FALSE	FALSE	FALSE	FALSE	FALSE	FALSE	FALSE	FALSE
2	ADCY3	NP_004027.2	0	0.000611403	-4.6925	-3.6037	-2.052	0.425167	-4.251	-3.5315	-3.113	FALSE	FALSE	FALSE	FALSE	FALSE	FALSE	FALSE	FALSE	FALSE	FALSE	FALSE	FALSE	FALSE	FALSE
3	VGLL4	NP_001121691.1	0	0	-4.101	-3.12582	-2.2675	0.318221	-3.6364	-3.071	-2.7831	FALSE	FALSE	FALSE	FALSE	FALSE	FALSE	TRUE	FALSE	FALSE	FALSE	FALSE	FALSE	FALSE	FALSE
7	JAZF1	NP_778231.2	0.000506073	0.0736336	-5.0865	-3.96073	-2.915	0.412063	-4.5495	-3.9335	-3.44455	FALSE	FALSE	FALSE	FALSE	FALSE	FALSE	TRUE	FALSE	FALSE	FALSE	FALSE	FALSE	FALSE	FALSE
4	SGMS2	NP_001129729.1	0	0	-3.9565	-3.61166	-2.3015	0.279885	-3.914	-3.6865	-3.1955	FALSE	FALSE	FALSE	FALSE	FALSE	FALSE	FALSE	FALSE	FALSE	FALSE	FALSE	FALSE	FALSE	FALSE
9	RORB	NP_001351952.1	0.252368	0.132238	-6.391	-4.39831	-2.3445	0.870262	-5.68	-4.3195	-3.294	FALSE	FALSE	FALSE	FALSE	FALSE	FALSE	TRUE	FALSE	FALSE	FALSE	TRUE	FALSE	FALSE	TRUE
5	PAIP2	NP_001028284.1	0	0.070034	-4.8475	-3.84802	-2.075	0.517477	-4.5655	-3.8305	-3.16875	FALSE	FALSE	FALSE	FALSE	FALSE	FALSE	FALSE	FALSE	FALSE	FALSE	FALSE	FALSE	FALSE	FALSE
11	SIDT2	NP_001035545.1	0.0788491	0.123222	-5.2795	-3.77894	-1.7125	0.748497	-4.9965	-3.497	-3.0328	FALSE	FALSE	FALSE	FALSE	FALSE	FALSE	TRUE	FALSE	FALSE	FALSE	FALSE	FALSE	FALSE	FALSE
19	ZNF491	NP_689569.2	0.00122115	0.0301624	-5.1445	-3.43869	-2.1535	0.554191	-4.2657	-3.3375	-2.808	FALSE	FALSE	FALSE	FALSE	FALSE	FALSE	FALSE	FALSE	FALSE	FALSE	FALSE	FALSE	FALSE	FALSE
16	TOX3	NP_001073899.2	0.0532125	0.125595	-5.3705	-3.80165	-2.0205	0.728189	-4.8857	-3.6945	-2.9065	FALSE	FALSE	FALSE	FALSE	FALSE	FALSE	TRUE	FALSE	FALSE	FALSE	FALSE	FALSE	FALSE	FALSE
3	TM4SF4	NP_004608.1	0	0	-4.57	-3.55373	-1.8425	0.48082	-4.12165	-3.6285	-2.8665	FALSE	FALSE	FALSE	FALSE	FALSE	FALSE	TRUE	FALSE	FALSE	FALSE	FALSE	FALSE	FALSE	FALSE
18	TPGS2	NP_001258880.1	0	0	-4.08	-3.53515	-2.792	0.228056	-3.863	-3.5075	-3.26	FALSE	FALSE	FALSE	FALSE	FALSE	FALSE	FALSE	FALSE	FALSE	FALSE	FALSE	FALSE	FALSE	FALSE
X	GPR34	NP_001091048.1	0.0911059	0.190207	-5.5115	-4.21402	-2.667	0.582565	-5.02935	-4.17975	-3.46165	FALSE	FALSE	FALSE	FALSE	FALSE	FALSE	FALSE	FALSE	FALSE	FALSE	FALSE	FALSE	FALSE	FALSE
X	TFE3	NP_006512.2	0.0642736	0.291414	-5.185	-4.23795	-2.126	0.61819	-5.005	-4.32425	-3.37475	FALSE	FALSE	FALSE	FALSE	FALSE	FALSE	FALSE	FALSE	FALSE	FALSE	TRUE	TRUE	TRUE	TRUE
6	SLC22A2	NP_003049.2	0	0	-4.6035	-3.42728	-1.4535	0.449327	-4.0005	-3.4465	-2.8269	FALSE	FALSE	FALSE	FALSE	FALSE	FALSE	TRUE	FALSE	FALSE	FALSE	FALSE	FALSE	FALSE	FALSE
10	TEX36	NP_001121674.1	0	0	-3.906	-3.27602	-1.876	0.205739	-3.4765	-3.319	-2.9919	FALSE	FALSE	FALSE	FALSE	FALSE	FALSE	FALSE	FALSE	FALSE	FALSE	FALSE	FALSE	FALSE	FALSE
X	TCP11X2	NP_001264352.1	0.18312	0.409463	-5.593	-4.70351	-2.513	0.372069	-5.1835	-4.70975	-4.22315	FALSE	FALSE	FALSE	FALSE	FALSE	FALSE	FALSE	FALSE	FALSE	FALSE	FALSE	FALSE	FALSE	FALSE
5	GFPT2	NP_005101.1	0.00321981	0.0347988	-5.3685	-3.61975	-2.132	0.504875	-4.3256	-3.566	-3.0185	FALSE	FALSE	FALSE	FALSE	FALSE	FALSE	TRUE	FALSE	FALSE	FALSE	FALSE	FALSE	FALSE	FALSE
6	OPRM1	NP_000905.3	0	0.0278638	-4.9925	-3.42613	-1.449	0.515802	-4.2147	-3.2935	-2.8658	FALSE	FALSE	FALSE	FALSE	FALSE	FALSE	TRUE	FALSE	FALSE	FALSE	FALSE	FALSE	FALSE	FALSE
16	VAT1L	NP_065978.1	0	0.0361258	-4.9665	-3.51872	-2.196	0.579374	-4.359	-3.46725	-2.788	FALSE	FALSE	FALSE	FALSE	FALSE	FALSE	FALSE	FALSE	FALSE	FALSE	FALSE	FALSE	FALSE	FALSE
1	NFYC	NP_001295043.1	0.204764	0.147714	-5.8555	-4.30657	-3.12	0.752481	-5.4365	-4.231	-3.373	FALSE	FALSE	FALSE	FALSE	FALSE	FALSE	FALSE	FALSE	FALSE	FALSE	FALSE	FALSE	FALSE	FALSE
19	ICAM4	NP_001535.1	0	0.0132882	-4.746	-3.56591	-1.848	0.544725	-4.2903	-3.57475	-2.82935	FALSE	FALSE	FALSE	FALSE	FALSE	FALSE	TRUE	FALSE	FALSE	FALSE	FALSE	FALSE	FALSE	FALSE
X	HSFX1	NP_057237.1	0.912865	0.0861598	-5.7905	-5.32827	-4.369	0.206092	-5.614	-5.32375	-5.072	FALSE	FALSE	FALSE	FALSE	FALSE	FALSE	FALSE	TRUE	FALSE	FALSE	FALSE	FALSE	FALSE	FALSE
10	SLC25A28	NP_112489.3	0.334961	0.154458	-6.346	-4.54793	-1.6985	0.907297	-5.7185	-4.5935	-3.3133	FALSE	FALSE	FALSE	FALSE	FALSE	FALSE	TRUE	FALSE	FALSE	FALSE	FALSE	FALSE	FALSE	FALSE
4	HPGDS	NP_055300.1	0	0	-4.586	-3.36762	-1.9605	0.504866	-4.0804	-3.333	-2.7461	FALSE	FALSE	FALSE	FALSE	FALSE	FALSE	TRUE	FALSE	FALSE	FALSE	FALSE	FALSE	FALSE	FALSE
2	CD8B	NP_742100.1	0	0	-4.282	-3.40403	-2.1255	0.366733	-3.925	-3.39325	-2.952	FALSE	FALSE	FALSE	FALSE	FALSE	FALSE	FALSE	FALSE	FALSE	FALSE	FALSE	FALSE	FALSE	FALSE
17	GUCY2D	NP_000171.1	0	0	-4.2285	-3.29872	-2.2325	0.334335	-3.7995	-3.253	-2.9015	TRUE	FALSE	FALSE	FALSE	FALSE	FALSE	FALSE	FALSE	FALSE	FALSE	FALSE	FALSE	FALSE	FALSE
8	ADGRA2	NP_116166.9	0	0	-4.472	-3.38327	-2.2795	0.412345	-4.0915	-3.298	-2.9315	FALSE	FALSE	FALSE	FALSE	FALSE	FALSE	FALSE	FALSE	FALSE	FALSE	FALSE	FALSE	FALSE	FALSE
12	DYRK4	NP_003836.1	0	0	-4.3675	-3.59997	-2.914	0.313676	-4.0475	-3.5765	-3.1972	FALSE	FALSE	FALSE	FALSE	FALSE	FALSE	FALSE	FALSE	FALSE	FALSE	FALSE	FALSE	FALSE	FALSE
1	DNAI3	NP_660155.2	0	0	-4.465	-3.63303	-2.379	0.352332	-4.139	-3.6135	-3.1885	FALSE	FALSE	FALSE	FALSE	FALSE	FALSE	FALSE	FALSE	FALSE	FALSE	FALSE	FALSE	FALSE	FALSE
12	CCDC184	NP_001013657.3	0	0	-4.1245	-3.20939	-2.1845	0.197621	-3.43025	-3.169	-3.03825	FALSE	FALSE	FALSE	FALSE	FALSE	FALSE	TRUE	FALSE	FALSE	FALSE	FALSE	FALSE	FALSE	FALSE
12	HCAR2	NP_808219.1	0	0.0282328	-5.0225	-3.52148	-2.004	0.562395	-4.31265	-3.48425	-2.81455	FALSE	FALSE	FALSE	FALSE	FALSE	FALSE	FALSE	FALSE	FALSE	FALSE	FALSE	FALSE	FALSE	FALSE
9	OR1L1	NP_001005236.3	0.171311	0.0700034	-6.5965	-3.73753	-2.068	1.12415	-5.5522	-3.39575	-2.595	FALSE	FALSE	FALSE	FALSE	FALSE	FALSE	FALSE	FALSE	FALSE	FALSE	FALSE	FALSE	FALSE	FALSE
21	KRTAP12-1	NP_859014.1	0.0625	0.0685307	-5.756	-3.65011	-2.648	0.764509	-4.79255	-3.54525	-2.74015	FALSE	FALSE	FALSE	FALSE	FALSE	FALSE	FALSE	FALSE	FALSE	FALSE	FALSE	FALSE	FALSE	FALSE
19	ZNF442	NP_110451.1	0.0235935	0.0452324	-5.776	-3.59767	-2.1235	0.565887	-4.4155	-3.45	-3.024	FALSE	FALSE	FALSE	FALSE	FALSE	FALSE	FALSE	FALSE	FALSE	FALSE	FALSE	FALSE	FALSE	FALSE
5	ADAMTS6	NP_922932.2	0.00471831	0.106667	-5.284	-3.87238	-2.2175	0.535498	-4.65	-3.8135	-3.202	FALSE	FALSE	FALSE	FALSE	FALSE	FALSE	TRUE	FALSE	FALSE	FALSE	FALSE	FALSE	FALSE	FALSE
2	ANO7	NP_001357623.1	0	0	-4.452	-3.15798	-2.276	0.339653	-3.654	-3.0915	-2.774	FALSE	FALSE	FALSE	FALSE	FALSE	FALSE	FALSE	FALSE	FALSE	FALSE	FALSE	FALSE	FALSE	FALSE
2	ITPRIPL1	NP_848590.3	0	0	-4.493	-3.44045	-2.518	0.32478	-3.8964	-3.4065	-3.047	FALSE	FALSE	FALSE	FALSE	FALSE	FALSE	FALSE	FALSE	FALSE	FALSE	FALSE	FALSE	FALSE	FALSE
17	PSMD3	NP_002800.2	0.0632234	0.117165	-5.839	-3.92283	-2.6805	0.669863	-4.89015	-3.83225	-3.108	FALSE	FALSE	FALSE	FALSE	FALSE	FALSE	TRUE	FALSE	FALSE	FALSE	FALSE	FALSE	FALSE	FALSE
14	PARP2	NP_005475.2	0	0	-4.528	-3.55286	-2.4585	0.401218	-4.11095	-3.5295	-3.033	FALSE	FALSE	FALSE	FALSE	FALSE	FALSE	FALSE	FALSE	FALSE	FALSE	FALSE	FALSE	FALSE	FALSE
X	HSD17B10	NP_004484.1	0.637024	0.0818713	-9.5715	-5.86971	-2.055	1.65509	-8.2017	-5.8	-3.7039	FALSE	FALSE	FALSE	FALSE	FALSE	FALSE	FALSE	FALSE	FALSE	FALSE	TRUE	FALSE	FALSE	TRUE
17	FBXO39	NP_694962.1	0	0	-4.348	-3.36041	-1.6785	0.346551	-3.853	-3.331	-2.9585	FALSE	FALSE	FALSE	FALSE	FALSE	FALSE	TRUE	FALSE	FALSE	FALSE	FALSE	FALSE	FALSE	FALSE
1	ATP5PB	NP_001679.2	0	0	-4.141	-3.51152	-2.097	0.359696	-3.942	-3.5645	-2.9995	FALSE	FALSE	FALSE	FALSE	FALSE	FALSE	FALSE	FALSE	FALSE	FALSE	FALSE	FALSE	FALSE	FALSE
6	ZNF165	NP_003438.1	0.000478469	0.042823	-5.119	-3.71008	-1.9385	0.48019	-4.419	-3.6205	-3.163	FALSE	FALSE	FALSE	FALSE	FALSE	FALSE	TRUE	FALSE	FALSE	FALSE	FALSE	FALSE	FALSE	FALSE
16	ITGAL	NP_002200.2	0	0	-4.397	-3.61791	-1.9525	0.345606	-4.098	-3.6065	-3.18635	FALSE	FALSE	FALSE	FALSE	FALSE	FALSE	TRUE	FALSE	FALSE	FALSE	FALSE	FALSE	FALSE	FALSE
17	HSPB9	NP_149971.1	0	0	-4.128	-3.31521	-1.9775	0.34019	-3.8291	-3.27575	-2.91295	FALSE	FALSE	FALSE	FALSE	FALSE	FALSE	FALSE	FALSE	FALSE	FALSE	FALSE	FALSE	FALSE	FALSE
12	BAZ2A	NP_038477.2	0	0.00573709	-4.733	-3.60118	-2.3795	0.288902	-3.916	-3.5915	-3.2675	FALSE	FALSE	FALSE	FALSE	FALSE	FALSE	TRUE	FALSE	FALSE	FALSE	FALSE	FALSE	FALSE	FALSE
6	PM20D2	NP_001010853.1	0	0	-3.9375	-3.43078	-2.178	0.297998	-3.8195	-3.4405	-3.0345	FALSE	FALSE	FALSE	FALSE	FALSE	FALSE	TRUE	FALSE	FALSE	FALSE	FALSE	FALSE	FALSE	FALSE
17	SOX15	NP_008873.1	0	0	-4.117	-3.34902	-1.9535	0.38536	-3.885	-3.279	-2.8995	FALSE	FALSE	FALSE	FALSE	FALSE	FALSE	FALSE	FALSE	FALSE	FALSE	FALSE	FALSE	FALSE	FALSE
16	PKD1L2	NP_001265352.1	0	0	-3.6635	-2.76353	-1.632	0.284937	-3.13675	-2.7545	-2.40525	FALSE	FALSE	FALSE	TRUE	FALSE	FALSE	TRUE	FALSE	FALSE	TRUE	FALSE	FALSE	FALSE	FALSE
14	TSSK4	NP_001171668.1	0	0	-4.499	-3.63039	-2.419	0.379133	-4.1464	-3.6205	-3.1355	FALSE	FALSE	FALSE	FALSE	FALSE	FALSE	FALSE	FALSE	FALSE	FALSE	FALSE	FALSE	FALSE	FALSE
5	RELL2	NP_001123501.1	0	0	-4.184	-3.38734	-2.3705	0.307283	-3.8285	-3.3615	-2.991	FALSE	FALSE	FALSE	FALSE	FALSE	FALSE	FALSE	FALSE	FALSE	FALSE	FALSE	FALSE	FALSE	FALSE
7	SNX13	NP_055947.1	0.0361142	0.0831467	-5.827	-3.73156	-1.8595	0.693484	-4.69205	-3.668	-2.8595	FALSE	FALSE	FALSE	FALSE	FALSE	FALSE	TRUE	FALSE	FALSE	FALSE	FALSE	FALSE	FALSE	FALSE
13	SLC25A30	NP_001010875.1	0	0.0386833	-4.9085	-3.65348	-2.245	0.500096	-4.405	-3.533	-3.103	FALSE	FALSE	FALSE	FALSE	FALSE	FALSE	FALSE	FALSE	FALSE	FALSE	FALSE	FALSE	FALSE	FALSE
4	GUCY1A1	NP_000847.2	0	0	-4.3945	-3.58972	-1.859	0.436212	-4.174	-3.59775	-3.0105	FALSE	FALSE	FALSE	FALSE	FALSE	FALSE	FALSE	FALSE	FALSE	FALSE	FALSE	FALSE	FALSE	FALSE
4	NAT8L	NP_848652.2	0.103808	0.0945913	-5.67	-3.84713	-1.8695	0.82857	-5.0778	-3.7795	-2.8049	FALSE	FALSE	FALSE	FALSE	FALSE	FALSE	FALSE	FALSE	FALSE	FALSE	FALSE	FALSE	FALSE	FALSE
9	DCTN3	NP_009165.1	0	0	-4.5865	-3.48457	-2.4085	0.387867	-4.0236	-3.4635	-2.9907	FALSE	FALSE	FALSE	FALSE	FALSE	FALSE	FALSE	FALSE	FALSE	FALSE	FALSE	FALSE	FALSE	FALSE
18	GNAL	NP_001135811.1	0.535317	0.120824	-7.7125	-5.13799	-2.1065	1.18655	-6.661	-5.197	-3.4939	FALSE	FALSE	FALSE	FALSE	FALSE	FALSE	FALSE	FALSE	FALSE	FALSE	FALSE	FALSE	FALSE	FALSE
11	TRIM21	NP_003132.2	0.00987623	0.0576322	-5.43	-3.56825	-2.0045	0.609343	-4.457	-3.4925	-2.842	FALSE	FALSE	FALSE	FALSE	FALSE	FALSE	FALSE	FALSE	FALSE	FALSE	FALSE	FALSE	FALSE	FALSE
11	STX5	NP_003155.2	0.0015737	0.0849799	-5.1025	-3.68986	-2.313	0.600622	-4.5756	-3.588	-2.9789	FALSE	FALSE	FALSE	FALSE	FALSE	FALSE	FALSE	FALSE	FALSE	FALSE	FALSE	FALSE	FALSE	FALSE
17	DHRS7C	NP_001207422.1	0	0	-4.355	-3.43044	-2.253	0.397417	-3.9754	-3.415	-2.9181	FALSE	FALSE	FALSE	FALSE	FALSE	FALSE	FALSE	FALSE	FALSE	FALSE	FALSE	FALSE	FALSE	FALSE
15	AAGAB	NP_078942.3	0	0	-3.8215	-3.24593	-2.3485	0.21209	-3.5196	-3.255	-2.9605	FALSE	FALSE	TRUE	FALSE	FALSE	FALSE	TRUE	FALSE	FALSE	FALSE	FALSE	FALSE	FALSE	FALSE
6	GJA1	NP_000156.1	0.272821	0.201686	-5.614	-4.38118	-2.0505	0.801366	-5.311	-4.538	-3.1805	TRUE	FALSE	FALSE	FALSE	FALSE	FALSE	TRUE	FALSE	FALSE	FALSE	TRUE	FALSE	FALSE	TRUE
4	HTRA3	NP_444272.1	0.000857192	0.0330876	-5.315	-3.45754	-1.7635	0.589643	-4.3172	-3.3845	-2.7527	FALSE	FALSE	FALSE	FALSE	FALSE	FALSE	FALSE	FALSE	FALSE	FALSE	FALSE	FALSE	FALSE	FALSE
X	DNASE1L1	NP_001009932.1	0.000196386	0.0388845	-5.0625	-3.85994	-2.4875	0.414108	-4.431	-3.825	-3.35115	FALSE	FALSE	FALSE	FALSE	FALSE	FALSE	FALSE	FALSE	FALSE	FALSE	FALSE	FALSE	FALSE	FALSE
3	PARP3	NP_001357168.1	0	0	-4.0915	-3.31009	-1.9855	0.327636	-3.75155	-3.313	-2.8815	FALSE	FALSE	FALSE	FALSE	FALSE	FALSE	FALSE	FALSE	FALSE	FALSE	FALSE	FALSE	FALSE	FALSE
15	TUBGCP5	NP_443135.3	0	0.000157422	-4.6385	-3.55328	-1.6145	0.433697	-4.1685	-3.5145	-3.022	FALSE	FALSE	FALSE	FALSE	FALSE	FALSE	FALSE	FALSE	FALSE	FALSE	FALSE	FALSE	FALSE	FALSE
15	DNAAF4	NP_570722.2	0	0	-4.009	-3.32678	-1.477	0.374086	-3.745	-3.4035	-2.79465	FALSE	FALSE	FALSE	FALSE	FALSE	FALSE	FALSE	FALSE	FALSE	FALSE	TRUE	FALSE	FALSE	TRUE
19	PGPEP1	NP_001316400.1	0.0145577	0.0411534	-5.8765	-3.91313	-3.1495	0.509255	-4.542	-3.90875	-3.22505	FALSE	FALSE	FALSE	FALSE	FALSE	FALSE	TRUE	FALSE	FALSE	FALSE	FALSE	FALSE	FALSE	FALSE
3	CSPG5	NP_001193872.1	0	0	-4.4255	-3.4619	-2.691	0.333578	-3.997	-3.34475	-3.118	FALSE	FALSE	FALSE	FALSE	FALSE	FALSE	FALSE	FALSE	FALSE	FALSE	FALSE	FALSE	FALSE	FALSE
15	UBE3A	NP_570853.1	0.66961	0.141411	-7.082	-5.39737	-2.5235	0.852849	-6.454	-5.4815	-4.2047	TRUE	FALSE	TRUE	FALSE	FALSE	FALSE	FALSE	FALSE	FALSE	FALSE	TRUE	TRUE	FALSE	TRUE
17	ODF4	NP_694552.2	0	0	-4.1515	-3.5079	-2.498	0.24612	-3.8125	-3.5275	-3.173	FALSE	FALSE	FALSE	FALSE	FALSE	FALSE	TRUE	FALSE	FALSE	FALSE	FALSE	FALSE	FALSE	FALSE
X	BTK	NP_000052.1	0.542519	0.182496	-7.2645	-5.26116	-3.594	0.833473	-6.474	-5.1635	-4.2192	FALSE	FALSE	TRUE	FALSE	FALSE	FALSE	FALSE	FALSE	FALSE	FALSE	FALSE	FALSE	FALSE	FALSE
9	ALDH1B1	NP_000683.3	0	0	-4.3625	-3.28281	-1.482	0.41374	-3.8825	-3.2275	-2.8035	FALSE	FALSE	FALSE	TRUE	FALSE	FALSE	FALSE	FALSE	FALSE	FALSE	FALSE	FALSE	FALSE	FALSE
4	RNF150	NP_065775.1	0	0.0873828	-5.052	-3.62928	-2.3125	0.615704	-4.5768	-3.5025	-2.9067	FALSE	FALSE	FALSE	FALSE	FALSE	FALSE	TRUE	FALSE	FALSE	FALSE	FALSE	FALSE	FALSE	FALSE
3	CLDND1	NP_001035290.1	0	0	-4.2235	-3.46043	-2.94	0.282976	-3.88375	-3.4025	-3.13	FALSE	FALSE	FALSE	FALSE	FALSE	FALSE	FALSE	FALSE	FALSE	FALSE	FALSE	FALSE	FALSE	FALSE
1	TCHHL1	NP_001008536.1	0.00162714	0.0320421	-5.372	-3.60571	-2.053	0.477789	-4.2945	-3.5375	-3.0265	FALSE	FALSE	FALSE	TRUE	FALSE	FALSE	TRUE	FALSE	FALSE	FALSE	FALSE	FALSE	FALSE	FALSE
17	HOXB7	NP_004493.3	0	0	-3.6585	-3.30852	-2.782	0.22434	-3.613	-3.254	-3.038	FALSE	FALSE	FALSE	FALSE	FALSE	FALSE	TRUE	FALSE	FALSE	FALSE	FALSE	FALSE	FALSE	FALSE
7	MIOS	NP_061878.3	0	0	-4.4595	-3.58624	-1.9165	0.414772	-4.189	-3.55225	-3.06295	FALSE	FALSE	FALSE	FALSE	FALSE	FALSE	FALSE	FALSE	FALSE	FALSE	FALSE	FALSE	FALSE	FALSE
5	IRX2	NP_001127694.1	0	0.00161117	-4.7445	-3.16688	-2.253	0.530696	-4.0356	-3.00575	-2.614	FALSE	FALSE	FALSE	FALSE	FALSE	FALSE	FALSE	FALSE	FALSE	FALSE	FALSE	FALSE	FALSE	FALSE
11	EED	NP_003788.2	0.351312	0.125562	-6.766	-4.67463	-2.706	0.988722	-6.1402	-4.5485	-3.4591	FALSE	FALSE	FALSE	FALSE	FALSE	FALSE	FALSE	FALSE	FALSE	FALSE	TRUE	FALSE	FALSE	TRUE
7	MEST	NP_002393.2	0.0951694	0.148882	-5.698	-4.03892	-1.185	0.744787	-5.04615	-4.04175	-3.035	FALSE	FALSE	FALSE	FALSE	FALSE	FALSE	FALSE	FALSE	FALSE	FALSE	FALSE	FALSE	FALSE	FALSE
8	SPAG11A	NP_001075021.2	0	0.0223285	-4.8235	-3.86105	-2.5885	0.322017	-4.2305	-3.8595	-3.451	FALSE	FALSE	FALSE	FALSE	FALSE	FALSE	FALSE	TRUE	FALSE	FALSE	FALSE	FALSE	FALSE	FALSE
6	H3C3	NP_003522.1	0.156651	0.114795	-7.0325	-3.68389	-1.2515	1.31031	-5.3943	-3.76	-1.7944	FALSE	FALSE	FALSE	FALSE	FALSE	FALSE	FALSE	FALSE	FALSE	FALSE	FALSE	FALSE	FALSE	FALSE
11	ANO5	NP_998764.1	0.0389744	0.0889648	-5.5465	-3.72217	-1.75	0.657863	-4.7365	-3.5645	-3.004	FALSE	FALSE	FALSE	TRUE	FALSE	FALSE	TRUE	FALSE	FALSE	FALSE	TRUE	FALSE	FALSE	TRUE
8	TNFRSF10C	NP_003832.3	0	0	-4.0065	-3.37052	-1.5425	0.334989	-3.8548	-3.3565	-2.97135	FALSE	FALSE	FALSE	FALSE	FALSE	FALSE	TRUE	FALSE	FALSE	FALSE	FALSE	FALSE	FALSE	FALSE
6	PRR18	NP_787118.2	0	0	-4.0585	-2.94472	-2.193	0.342131	-3.47	-2.8625	-2.574	FALSE	FALSE	FALSE	FALSE	FALSE	FALSE	FALSE	FALSE	FALSE	FALSE	FALSE	FALSE	FALSE	FALSE
22	SEPTIN5	NP_002679.2	0.054144	0.125983	-5.8155	-3.87262	-2.84	0.706049	-4.87285	-3.828	-2.945	FALSE	FALSE	FALSE	FALSE	FALSE	FALSE	FALSE	FALSE	FALSE	FALSE	FALSE	FALSE	FALSE	FALSE
3	FAM107A	NP_001269643.1	0	0	-3.7565	-3.26304	-2.832	0.146333	-3.4635	-3.25325	-3.082	FALSE	FALSE	FALSE	FALSE	FALSE	FALSE	FALSE	FALSE	FALSE	FALSE	FALSE	FALSE	FALSE	FALSE
19	ZNF549	NP_694995.3	0.0342817	0.0506401	-5.487	-3.67659	-2.1195	0.573542	-4.541	-3.53	-3.0945	FALSE	FALSE	FALSE	FALSE	FALSE	FALSE	FALSE	FALSE	FALSE	FALSE	FALSE	FALSE	FALSE	FALSE
4	TMPRSS11A	NP_872412.3	0	0	-4.073	-3.64343	-1.9935	0.333209	-4.0341	-3.6895	-3.195	FALSE	FALSE	FALSE	FALSE	FALSE	FALSE	FALSE	FALSE	FALSE	FALSE	FALSE	FALSE	FALSE	FALSE
19	CTXN1	NP_996664.1	0	0	-3.9705	-3.34747	-2.2765	0.270155	-3.6975	-3.346	-3.002	FALSE	FALSE	FALSE	FALSE	FALSE	FALSE	FALSE	FALSE	FALSE	FALSE	FALSE	FALSE	FALSE	FALSE
X	VGLL1	NP_057351.1	0.000734394	0.0607099	-5.1175	-3.77527	-2.4795	0.392558	-4.2873	-3.7495	-3.3347	FALSE	FALSE	FALSE	FALSE	FALSE	FALSE	FALSE	FALSE	FALSE	FALSE	FALSE	FALSE	FALSE	FALSE
1	GUCA2B	NP_009033.1	0	0	-4.3455	-3.38718	-1.781	0.383406	-3.8862	-3.3805	-2.909	FALSE	FALSE	FALSE	FALSE	FALSE	FALSE	FALSE	FALSE	FALSE	FALSE	FALSE	FALSE	FALSE	FALSE
6	NEU1	NP_000425.1	0	0.00316106	-4.868	-3.66541	-2.9815	0.324696	-4.1237	-3.6215	-3.2725	FALSE	TRUE	FALSE	FALSE	FALSE	FALSE	TRUE	FALSE	FALSE	FALSE	TRUE	FALSE	FALSE	TRUE
13	KPNA3	NP_002258.2	0.288061	0.160406	-6.4835	-4.49603	-2.0985	0.84527	-5.6515	-4.483	-3.3573	FALSE	FALSE	FALSE	FALSE	FALSE	FALSE	FALSE	FALSE	FALSE	FALSE	FALSE	FALSE	FALSE	FALSE
1	S100A8	NP_001306127.1	0.00118273	0.0863394	-5.0855	-3.60011	-2.266	0.56974	-4.5315	-3.438	-2.991	FALSE	FALSE	FALSE	FALSE	FALSE	FALSE	FALSE	FALSE	FALSE	FALSE	FALSE	FALSE	FALSE	FALSE
11	JRKL	NP_001248762.1	0.00660558	0.0449606	-5.5695	-3.72454	-2.347	0.484925	-4.4185	-3.65425	-3.1665	FALSE	FALSE	FALSE	FALSE	FALSE	FALSE	FALSE	FALSE	FALSE	FALSE	FALSE	FALSE	FALSE	FALSE
3	OR5K2	NP_001004737.1	0.0255393	0.0733391	-5.4695	-3.48432	-0.632	0.764188	-4.6136	-3.3615	-2.5855	FALSE	FALSE	FALSE	FALSE	FALSE	FALSE	FALSE	FALSE	FALSE	FALSE	FALSE	FALSE	FALSE	FALSE
14	GPHB5	NP_660154.3	0	0	-3.677	-3.09616	-2.55	0.19411	-3.37935	-3.071	-2.86865	FALSE	FALSE	FALSE	FALSE	FALSE	FALSE	FALSE	FALSE	FALSE	FALSE	FALSE	FALSE	FALSE	FALSE
6	PSORS1C1	NP_054787.2	0	0.000389864	-4.626	-3.58878	-3.055	0.291071	-4.0259	-3.522	-3.277	FALSE	FALSE	FALSE	FALSE	FALSE	FALSE	TRUE	FALSE	FALSE	FALSE	FALSE	FALSE	FALSE	FALSE
7	MDH2	NP_001269333.1	0	0	-4.4235	-3.31046	-1.8455	0.490991	-3.9735	-3.3195	-2.6517	FALSE	FALSE	FALSE	FALSE	FALSE	FALSE	FALSE	FALSE	FALSE	FALSE	TRUE	FALSE	FALSE	TRUE
19	SIGLEC10	NP_001309034.1	0	0.0168847	-4.8655	-3.60907	-1.441	0.565342	-4.3275	-3.6475	-2.8388	FALSE	FALSE	FALSE	FALSE	FALSE	FALSE	FALSE	FALSE	FALSE	FALSE	FALSE	FALSE	FALSE	FALSE
19	ZNF587B	NP_001191747.1	0.00501253	0.0495469	-5.2055	-3.54051	-2.689	0.512053	-4.2796	-3.4425	-2.9628	FALSE	FALSE	FALSE	FALSE	FALSE	FALSE	FALSE	FALSE	FALSE	FALSE	FALSE	FALSE	FALSE	FALSE
1	ST6GALNAC5	NP_112227.1	0	0.000825593	-4.632	-3.5458	-1.9275	0.50074	-4.2623	-3.53	-2.8817	FALSE	FALSE	FALSE	FALSE	FALSE	FALSE	FALSE	FALSE	FALSE	FALSE	FALSE	FALSE	FALSE	FALSE
15	OTUD7A	NP_570971.1	0.153924	0.0855652	-6.056	-3.92386	-2.23	0.899164	-5.34885	-3.7455	-2.846	FALSE	FALSE	FALSE	FALSE	FALSE	FALSE	FALSE	FALSE	FALSE	FALSE	TRUE	FALSE	FALSE	TRUE
6	FBXO5	NP_036309.1	0	0.00527669	-4.726	-3.56694	-2.0925	0.432724	-4.193	-3.5135	-3.0605	FALSE	FALSE	FALSE	FALSE	FALSE	FALSE	FALSE	FALSE	FALSE	FALSE	FALSE	FALSE	FALSE	FALSE
5	SIMC1	NP_001295124.1	0	0	-4.585	-3.56957	-2.3335	0.428036	-4.21505	-3.4965	-3.07745	FALSE	FALSE	FALSE	FALSE	FALSE	FALSE	FALSE	FALSE	FALSE	FALSE	FALSE	FALSE	FALSE	FALSE
2	MARCHF4	NP_065865.1	0	0.0362782	-4.9795	-3.70426	-2.056	0.538637	-4.41125	-3.7425	-3.00545	FALSE	FALSE	FALSE	FALSE	FALSE	FALSE	FALSE	FALSE	FALSE	FALSE	FALSE	FALSE	FALSE	FALSE
17	KRTAP4-8	NP_114166.1	0.190748	0.0871606	-6.5995	-3.85325	-1.914	1.15404	-5.6147	-3.6125	-2.544	FALSE	FALSE	FALSE	FALSE	FALSE	FALSE	FALSE	FALSE	FALSE	FALSE	FALSE	FALSE	FALSE	FALSE
16	PSMB10	NP_002792.1	0	0.00733176	-4.7405	-3.57764	-3.0605	0.416924	-4.2256	-3.488	-3.1045	FALSE	FALSE	FALSE	FALSE	FALSE	FALSE	FALSE	FALSE	FALSE	FALSE	FALSE	FALSE	FALSE	FALSE
16	GDPD3	NP_077283.2	0	0	-4.1805	-3.44897	-2.243	0.351809	-3.91885	-3.462	-2.979	FALSE	FALSE	FALSE	FALSE	FALSE	FALSE	FALSE	FALSE	FALSE	FALSE	FALSE	FALSE	FALSE	FALSE
16	NAE1	NP_001273429.1	0.000499351	0.043044	-5.176	-3.67165	-2.205	0.457811	-4.322	-3.6085	-3.1461	FALSE	FALSE	FALSE	FALSE	FALSE	FALSE	FALSE	FALSE	FALSE	FALSE	FALSE	FALSE	FALSE	FALSE
2	ETAA1	NP_061875.2	0	0	-4.2315	-3.41462	-1.843	0.286517	-3.746	-3.4385	-3.0475	FALSE	FALSE	FALSE	FALSE	FALSE	FALSE	TRUE	FALSE	FALSE	FALSE	FALSE	FALSE	FALSE	FALSE
21	CBS	NP_000062.1	0.564155	0.435845	-6.3845	-5.21604	-4.8005	0.358183	-5.75785	-5.127	-4.8295	FALSE	TRUE	FALSE	FALSE	FALSE	FALSE	TRUE	TRUE	FALSE	FALSE	TRUE	FALSE	FALSE	TRUE
19	ZNF559	NP_001189341.1	0.000797448	0.0183413	-5.0705	-3.54401	-2.952	0.458232	-4.16825	-3.504	-2.9949	FALSE	FALSE	FALSE	FALSE	FALSE	FALSE	FALSE	FALSE	FALSE	FALSE	FALSE	FALSE	FALSE	FALSE
22	DNAJB7	NP_660157.1	0	0	-4.605	-3.52157	-1.75	0.429121	-4.1566	-3.483	-3.0133	FALSE	FALSE	FALSE	FALSE	FALSE	FALSE	FALSE	FALSE	FALSE	FALSE	FALSE	FALSE	FALSE	FALSE
3	PCOLCE2	NP_037495.1	0	0.00129555	-4.659	-3.50237	-2.063	0.46409	-4.145	-3.4835	-2.9125	FALSE	FALSE	FALSE	FALSE	FALSE	FALSE	TRUE	FALSE	FALSE	FALSE	FALSE	FALSE	FALSE	FALSE
2	ACVR2A	NP_001265508.1	0.327856	0.162147	-6.783	-4.59876	-1.772	0.939901	-5.8815	-4.5915	-3.3385	FALSE	FALSE	FALSE	FALSE	FALSE	FALSE	TRUE	FALSE	FALSE	FALSE	FALSE	FALSE	FALSE	FALSE
3	GXYLT2	NP_001073862.1	0	0.00622859	-4.704	-3.43328	-2.3065	0.488595	-4.1475	-3.348	-2.858	FALSE	FALSE	FALSE	FALSE	FALSE	FALSE	TRUE	FALSE	FALSE	FALSE	FALSE	FALSE	FALSE	FALSE
11	LRFN4	NP_076941.2	0	0	-4.513	-3.39569	-2.444	0.477114	-4.13	-3.321	-2.8285	FALSE	FALSE	FALSE	FALSE	FALSE	FALSE	FALSE	FALSE	FALSE	FALSE	FALSE	FALSE	FALSE	FALSE
6	C6orf47	NP_067007.3	0	0	-4.4195	-3.4014	-2.4765	0.248531	-3.6675	-3.3855	-3.1475	FALSE	FALSE	FALSE	FALSE	FALSE	FALSE	FALSE	FALSE	FALSE	FALSE	FALSE	FALSE	FALSE	FALSE
19	ZNF714	NP_872321.2	0.108076	0.051828	-5.8585	-3.60993	-1.56	0.865176	-5.12275	-3.2725	-2.831	FALSE	FALSE	FALSE	FALSE	FALSE	FALSE	FALSE	FALSE	FALSE	FALSE	FALSE	FALSE	FALSE	FALSE
5	EPB41L4A	NP_001334816.1	0.0196143	0.0314918	-5.277	-3.38363	-1.409	0.494062	-4.097	-3.25	-3.069	FALSE	FALSE	FALSE	FALSE	FALSE	FALSE	TRUE	FALSE	FALSE	FALSE	FALSE	FALSE	FALSE	FALSE
8	LYNX1-SLURP2	NP_076435.1	0	0	-4.087	-3.3517	-2.403	0.280546	-3.75885	-3.325	-3.0245	FALSE	FALSE	FALSE	FALSE	FALSE	FALSE	FALSE	FALSE	FALSE	FALSE	FALSE	FALSE	FALSE	FALSE
2	CDK5R2	NP_003927.1	0.1049	0.116515	-5.755	-3.82895	-2.4915	0.801719	-5.077	-3.5925	-2.9515	FALSE	FALSE	FALSE	FALSE	FALSE	FALSE	FALSE	FALSE	FALSE	FALSE	FALSE	FALSE	FALSE	FALSE
19	ZNF682	NP_149973.1	0.082343	0.0579372	-6.1665	-3.63919	-1.909	0.778455	-4.8952	-3.3005	-2.969	FALSE	FALSE	FALSE	FALSE	FALSE	FALSE	FALSE	FALSE	FALSE	FALSE	FALSE	FALSE	FALSE	FALSE
19	AP1M2	NP_001287816.1	0.0020098	0.0314031	-5.2395	-3.53507	-2.5685	0.539616	-4.319	-3.462	-2.876	FALSE	FALSE	FALSE	FALSE	FALSE	FALSE	TRUE	FALSE	FALSE	FALSE	FALSE	FALSE	FALSE	FALSE
9	TEK	NP_000450.3	0.0111759	0.0669596	-5.405	-3.6748	-1.98	0.564852	-4.50915	-3.574	-3.018	TRUE	FALSE	FALSE	FALSE	FALSE	FALSE	TRUE	FALSE	FALSE	FALSE	TRUE	FALSE	FALSE	TRUE
17	FDXR	NP_001244941.2	0	0	-3.773	-3.23916	-2.35	0.234652	-3.584	-3.216	-2.954	FALSE	FALSE	FALSE	FALSE	FALSE	FALSE	FALSE	FALSE	FALSE	FALSE	FALSE	FALSE	FALSE	FALSE
19	SIGLEC11	NP_443116.2	0	0.0272815	-4.96	-3.48269	-2.259	0.531266	-4.2575	-3.423	-2.8455	FALSE	FALSE	FALSE	FALSE	FALSE	FALSE	FALSE	FALSE	FALSE	FALSE	FALSE	FALSE	FALSE	FALSE
11	TAF6L	NP_006464.1	0	0	-4.4055	-3.44708	-2.4625	0.404896	-4.109	-3.351	-2.9965	FALSE	FALSE	FALSE	FALSE	FALSE	FALSE	FALSE	FALSE	FALSE	FALSE	FALSE	FALSE	FALSE	FALSE
7	ZNF800	NP_789784.2	0.000349711	0.0843679	-5.0635	-3.78641	-2.3095	0.502351	-4.53065	-3.7195	-3.1955	FALSE	FALSE	FALSE	FALSE	FALSE	FALSE	TRUE	FALSE	FALSE	FALSE	FALSE	FALSE	FALSE	FALSE
4	DEFB131A	NP_001035538.2	0	0	-3.6925	-2.79509	-0.9845	0.557225	-3.5928	-2.7665	-2.0751	FALSE	FALSE	FALSE	FALSE	FALSE	FALSE	FALSE	FALSE	FALSE	FALSE	FALSE	FALSE	FALSE	FALSE
19	ZNF813	NP_001004301.2	0.126142	0.0523416	-6.6095	-3.7429	-1.8055	0.92354	-5.3097	-3.3385	-2.9688	FALSE	FALSE	FALSE	FALSE	FALSE	FALSE	FALSE	FALSE	FALSE	FALSE	FALSE	FALSE	FALSE	FALSE
10	POLR3A	NP_008986.2	0	0.0188894	-4.895	-3.65604	-2.5775	0.457164	-4.3445	-3.5735	-3.1205	FALSE	FALSE	FALSE	FALSE	FALSE	FALSE	FALSE	FALSE	FALSE	FALSE	TRUE	FALSE	FALSE	TRUE
11	RASSF10	NP_001073990.2	0	0	-4.337	-3.19367	-2.1575	0.354694	-3.701	-3.141	-2.7705	FALSE	FALSE	FALSE	FALSE	FALSE	FALSE	FALSE	FALSE	FALSE	FALSE	FALSE	FALSE	FALSE	FALSE
16	PHKG2	NP_000285.1	0.00181488	0.0474462	-5.2455	-3.4216	-2.9125	0.550778	-4.3525	-3.18775	-2.939	FALSE	TRUE	FALSE	FALSE	FALSE	FALSE	FALSE	FALSE	FALSE	FALSE	FALSE	FALSE	FALSE	FALSE
7	STRA8	NP_001381330.1	0	0	-4.2525	-3.797	-2.5825	0.199782	-4.0315	-3.825	-3.5278	FALSE	FALSE	FALSE	FALSE	FALSE	FALSE	FALSE	FALSE	FALSE	FALSE	FALSE	FALSE	FALSE	FALSE
3	EEF1AKMT4	NP_115707.2	0	0	-3.516	-3.20583	-2.5975	0.156515	-3.411	-3.209	-2.9983	FALSE	FALSE	FALSE	FALSE	FALSE	FALSE	FALSE	FALSE	FALSE	FALSE	FALSE	FALSE	FALSE	FALSE
11	IFITM1	NP_003632.4	0.282895	0.0608553	-6.732	-4.1349	-1.3365	1.23807	-6.0692	-3.6245	-2.8998	FALSE	FALSE	FALSE	FALSE	FALSE	FALSE	TRUE	FALSE	FALSE	FALSE	FALSE	FALSE	FALSE	FALSE
6	GTF2H4	NP_001508.1	0	0.000473093	-4.641	-3.61976	-2.52	0.376667	-4.1375	-3.593	-3.1367	FALSE	FALSE	FALSE	FALSE	FALSE	FALSE	TRUE	FALSE	FALSE	FALSE	FALSE	FALSE	FALSE	FALSE
11	GPR152	NP_996880.1	0.000165508	0.0243297	-5.061	-3.56267	-2.14	0.465877	-4.2595	-3.47025	-3.0455	FALSE	FALSE	FALSE	FALSE	FALSE	FALSE	FALSE	FALSE	FALSE	FALSE	FALSE	FALSE	FALSE	FALSE
6	FOXF2	NP_001443.1	0	0	-4.3445	-3.34791	-2.3655	0.484874	-4.0705	-3.1645	-2.8202	FALSE	FALSE	FALSE	FALSE	FALSE	FALSE	FALSE	FALSE	FALSE	FALSE	FALSE	FALSE	FALSE	FALSE
3	FXR1	NP_005078.2	0.227264	0.136822	-6.5645	-4.34557	-2.9005	0.827244	-5.54015	-4.232	-3.336	FALSE	FALSE	FALSE	FALSE	FALSE	FALSE	FALSE	FALSE	FALSE	FALSE	FALSE	FALSE	FALSE	FALSE
17	SDF2	NP_008854.2	0	0.00933786	-4.9515	-3.61334	-2.727	0.433236	-4.226	-3.556	-3.0898	FALSE	FALSE	FALSE	FALSE	FALSE	FALSE	FALSE	FALSE	FALSE	FALSE	FALSE	FALSE	FALSE	FALSE
8	MYBL1	NP_001073885.1	0.0952075	0.095992	-5.6935	-3.906	-2.365	0.710795	-5.0375	-3.7305	-3.10155	FALSE	FALSE	FALSE	FALSE	FALSE	FALSE	FALSE	FALSE	FALSE	FALSE	FALSE	FALSE	FALSE	FALSE
19	SARS2	NP_060297.1	0	0	-3.9035	-3.32115	-2.477	0.264739	-3.68375	-3.3165	-2.969	FALSE	FALSE	FALSE	FALSE	FALSE	FALSE	FALSE	FALSE	FALSE	FALSE	TRUE	FALSE	FALSE	TRUE
17	STH	NP_001007533.1	0	0	-3.7325	-3.53972	-3.328	0.0702153	-3.631	-3.5385	-3.446	FALSE	FALSE	FALSE	FALSE	FALSE	FALSE	FALSE	TRUE	FALSE	FALSE	FALSE	FALSE	FALSE	FALSE
3	NLGN1	NP_055747.1	0.156489	0.12957	-6.617	-4.12822	-2.523	0.812255	-5.31675	-4.0075	-3.1465	FALSE	FALSE	FALSE	FALSE	FALSE	FALSE	TRUE	FALSE	FALSE	FALSE	FALSE	FALSE	FALSE	FALSE
X	CDKL5	NP_003150.1	0.211455	0.0993189	-6.143	-4.43802	-2.975	0.654956	-5.49805	-4.25	-3.7345	FALSE	FALSE	TRUE	FALSE	FALSE	FALSE	FALSE	FALSE	FALSE	FALSE	TRUE	TRUE	TRUE	TRUE
11	TYR	NP_000363.1	0	0	-3.9265	-3.31888	-1.839	0.249309	-3.62	-3.3475	-2.974	FALSE	TRUE	FALSE	FALSE	FALSE	FALSE	FALSE	FALSE	FALSE	TRUE	TRUE	FALSE	FALSE	TRUE
3	RFC4	NP_002907.1	0	0	-4.233	-3.32975	-2.074	0.455002	-3.9004	-3.389	-2.6924	FALSE	FALSE	FALSE	FALSE	FALSE	FALSE	FALSE	FALSE	FALSE	FALSE	FALSE	FALSE	FALSE	FALSE
X	PCYT1B	NP_004836.2	0.289738	0.244851	-6.1325	-4.69201	-3.227	0.573479	-5.473	-4.6755	-3.913	FALSE	FALSE	FALSE	FALSE	FALSE	FALSE	FALSE	FALSE	FALSE	FALSE	FALSE	FALSE	FALSE	FALSE
7	RBAK	NP_001191385.1	0.0197368	0.0492156	-5.6225	-3.56155	-2.4605	0.600303	-4.44685	-3.43075	-2.8945	FALSE	FALSE	FALSE	FALSE	FALSE	FALSE	FALSE	FALSE	FALSE	FALSE	FALSE	FALSE	FALSE	FALSE
2	ZC3H8	NP_115883.2	0	0.0640638	-4.8545	-3.91247	-2.657	0.408115	-4.53625	-3.8525	-3.4345	FALSE	FALSE	FALSE	FALSE	FALSE	FALSE	FALSE	FALSE	FALSE	FALSE	FALSE	FALSE	FALSE	FALSE
17	ZNF18	NP_653281.2	0.00122756	0.101887	-5.1215	-3.76049	-1.901	0.562805	-4.6275	-3.658	-3.1333	FALSE	FALSE	FALSE	FALSE	FALSE	FALSE	FALSE	FALSE	FALSE	FALSE	FALSE	FALSE	FALSE	FALSE
17	TRIM16	NP_006461.3	0	0.00601504	-4.7275	-3.56727	-2.6515	0.411602	-4.1915	-3.49	-3.0875	FALSE	FALSE	FALSE	FALSE	FALSE	FALSE	FALSE	FALSE	FALSE	FALSE	FALSE	FALSE	FALSE	FALSE
1	PUSL1	NP_699170.1	0	0	-4.15	-3.05524	-2.1685	0.415636	-3.67385	-2.98	-2.556	FALSE	FALSE	FALSE	FALSE	FALSE	FALSE	FALSE	FALSE	FALSE	FALSE	FALSE	FALSE	FALSE	FALSE
11	TAF10	NP_006275.1	0.000370645	0.0785767	-5.156	-3.66554	-2.236	0.691938	-4.57615	-3.681	-2.74635	FALSE	FALSE	FALSE	FALSE	FALSE	FALSE	FALSE	FALSE	FALSE	FALSE	FALSE	FALSE	FALSE	FALSE
3	LRRC31	NP_079003.2	0	0	-4.3105	-3.52926	-1.7395	0.38175	-4.056	-3.536	-3.04545	FALSE	FALSE	FALSE	FALSE	FALSE	FALSE	TRUE	FALSE	FALSE	FALSE	FALSE	FALSE	FALSE	FALSE
4	PDE6B	NP_000274.3	0	0.00153509	-4.7465	-3.40201	-2.212	0.429149	-4.00355	-3.3555	-2.8775	TRUE	FALSE	FALSE	FALSE	FALSE	FALSE	FALSE	FALSE	FALSE	FALSE	FALSE	FALSE	FALSE	FALSE
11	BAD	NP_116784.1	0	0	-3.808	-3.11483	-2.3795	0.223357	-3.39025	-3.1185	-2.831	FALSE	FALSE	FALSE	FALSE	FALSE	FALSE	FALSE	FALSE	FALSE	FALSE	FALSE	FALSE	FALSE	FALSE
7	OR2A25	NP_001004488.1	0.0290859	0.0753116	-5.733	-3.55379	-1.673	0.739302	-4.6355	-3.459	-2.66	FALSE	FALSE	FALSE	FALSE	FALSE	FALSE	FALSE	FALSE	FALSE	FALSE	FALSE	FALSE	FALSE	FALSE
6	VNN2	NP_004656.3	0	0	-4.0745	-3.4835	-1.5945	0.370523	-3.90595	-3.5525	-2.95855	FALSE	FALSE	FALSE	FALSE	FALSE	FALSE	FALSE	FALSE	FALSE	FALSE	FALSE	FALSE	FALSE	FALSE
9	TPRN	NP_001121700.2	0	0.00197463	-4.8725	-3.10145	-2.2085	0.305662	-3.4397	-3.0695	-2.7698	FALSE	TRUE	FALSE	FALSE	FALSE	FALSE	FALSE	FALSE	FALSE	FALSE	FALSE	FALSE	FALSE	FALSE
15	ALDH1A3	NP_000684.2	0	0.00943815	-4.748	-3.73906	-2.025	0.484064	-4.36875	-3.7665	-3.0795	FALSE	FALSE	FALSE	FALSE	FALSE	FALSE	FALSE	FALSE	FALSE	FALSE	TRUE	FALSE	FALSE	TRUE
6	KIAA0319	NP_055624.2	0	0	-4.4025	-3.59443	-1.5445	0.414686	-4.1075	-3.6345	-3.037	FALSE	FALSE	FALSE	FALSE	FALSE	FALSE	TRUE	FALSE	FALSE	FALSE	FALSE	FALSE	FALSE	FALSE
11	MRPL49	NP_004918.1	0	0	-3.7685	-3.4163	-2.9985	0.143982	-3.607	-3.4205	-3.2176	FALSE	FALSE	FALSE	FALSE	FALSE	FALSE	FALSE	FALSE	FALSE	FALSE	FALSE	FALSE	FALSE	FALSE
20	GPCPD1	NP_062539.1	0.0603969	0.122606	-5.6895	-3.98227	-1.9615	0.641977	-4.893	-3.9355	-3.18695	FALSE	FALSE	FALSE	FALSE	FALSE	FALSE	TRUE	FALSE	FALSE	FALSE	FALSE	FALSE	FALSE	FALSE
19	ZNF649	NP_075562.2	0.00345395	0.0597039	-5.168	-3.68313	-1.9855	0.547191	-4.43655	-3.62125	-3.022	FALSE	FALSE	FALSE	FALSE	FALSE	FALSE	FALSE	FALSE	FALSE	FALSE	FALSE	FALSE	FALSE	FALSE
1	DLGAP3	NP_001073887.1	0.000880127	0.014082	-5.3505	-3.51992	-2.3355	0.450774	-4.1779	-3.4145	-3.0175	FALSE	FALSE	FALSE	FALSE	FALSE	FALSE	TRUE	FALSE	FALSE	FALSE	FALSE	FALSE	FALSE	FALSE
4	CXXC4	NP_079488.2	0.0765129	0.0737306	-6.084	-3.65777	-2.529	0.753842	-4.9198	-3.384	-2.9412	FALSE	FALSE	FALSE	FALSE	FALSE	FALSE	FALSE	FALSE	FALSE	FALSE	FALSE	FALSE	FALSE	FALSE
10	SHTN1	NP_001120683.1	0.021948	0.10024	-5.523	-3.90221	-2.206	0.566292	-4.687	-3.8755	-3.1895	FALSE	FALSE	FALSE	FALSE	FALSE	FALSE	TRUE	FALSE	FALSE	FALSE	FALSE	FALSE	FALSE	FALSE
1	SPAG17	NP_996879.1	0	0	-4.545	-3.5001	-2.4415	0.271821	-3.8445	-3.477	-3.188	FALSE	FALSE	FALSE	FALSE	FALSE	FALSE	FALSE	FALSE	FALSE	FALSE	FALSE	FALSE	FALSE	FALSE
12	TRHDE	NP_037513.2	0.0123839	0.089307	-5.3115	-3.80237	-2.571	0.550947	-4.6225	-3.714	-3.145	FALSE	FALSE	FALSE	FALSE	FALSE	FALSE	TRUE	FALSE	FALSE	FALSE	FALSE	FALSE	FALSE	FALSE
9	WNK2	NP_001269323.1	0.0131455	0.0558746	-5.352	-3.45359	-2.376	0.545023	-4.3105	-3.3285	-2.9215	FALSE	FALSE	FALSE	FALSE	FALSE	FALSE	FALSE	FALSE	FALSE	FALSE	FALSE	FALSE	FALSE	FALSE
8	CSGALNACT1	NP_001123990.1	0	0	-4.326	-3.04274	-1.511	0.490122	-3.7024	-3.041	-2.3886	FALSE	FALSE	FALSE	FALSE	FALSE	FALSE	FALSE	FALSE	FALSE	TRUE	FALSE	FALSE	FALSE	FALSE
1	S100A3	NP_002951.1	0.069222	0.0532037	-6.438	-3.65252	-3.0105	0.712449	-4.79165	-3.35725	-3.042	FALSE	FALSE	FALSE	FALSE	FALSE	FALSE	FALSE	FALSE	FALSE	FALSE	FALSE	FALSE	FALSE	FALSE
20	CNBD2	NP_543024.2	0	0	-4.253	-3.38312	-2.0625	0.255365	-3.72505	-3.363	-3.097	FALSE	FALSE	FALSE	FALSE	FALSE	FALSE	TRUE	FALSE	FALSE	FALSE	FALSE	FALSE	FALSE	FALSE
11	SLC37A2	NP_938018.1	0.000895857	0.0698768	-5.082	-3.61438	-2.0245	0.545264	-4.50205	-3.411	-3.0935	FALSE	FALSE	FALSE	FALSE	FALSE	FALSE	FALSE	FALSE	FALSE	FALSE	FALSE	FALSE	FALSE	FALSE
4	TBC1D19	NP_001278983.1	0.00119076	0.0975232	-5.1365	-3.94398	-2.3285	0.474721	-4.6135	-3.89225	-3.33835	FALSE	FALSE	FALSE	FALSE	FALSE	FALSE	FALSE	FALSE	FALSE	FALSE	FALSE	FALSE	FALSE	FALSE
17	PITPNC1	NP_858057.1	0.26458	0.181264	-6.792	-4.44027	-2.3845	0.874304	-5.585	-4.496	-3.1805	FALSE	FALSE	FALSE	FALSE	FALSE	FALSE	TRUE	FALSE	FALSE	FALSE	FALSE	FALSE	FALSE	FALSE
1	ST7L	NP_060214.2	0.0481853	0.0934753	-6.123	-3.87365	-2.3815	0.627279	-4.766	-3.764	-3.1645	FALSE	FALSE	FALSE	FALSE	FALSE	FALSE	TRUE	FALSE	FALSE	FALSE	FALSE	FALSE	FALSE	FALSE
17	PRPSAP1	NP_002757.2	0	0.0468021	-4.922	-3.73293	-2.3045	0.557271	-4.4785	-3.7415	-2.9688	FALSE	FALSE	FALSE	FALSE	FALSE	FALSE	FALSE	FALSE	FALSE	FALSE	FALSE	FALSE	FALSE	FALSE
2	SPRED2	NP_861449.2	0	0	-4.2565	-3.29397	-2.217	0.387409	-3.87495	-3.20475	-2.8475	FALSE	FALSE	FALSE	FALSE	FALSE	FALSE	TRUE	FALSE	FALSE	FALSE	TRUE	FALSE	FALSE	TRUE
20	PEDS1-UBE2V1	NP_954673.2	0.0322508	0.0609183	-5.555	-3.75082	-1.877	0.569486	-4.5873	-3.626	-3.1591	FALSE	FALSE	FALSE	FALSE	FALSE	FALSE	FALSE	FALSE	FALSE	FALSE	FALSE	FALSE	FALSE	FALSE
19	SMG9	NP_061981.2	0.000883504	0.0315537	-5.219	-3.68077	-2.6945	0.424894	-4.3259	-3.5665	-3.226	FALSE	FALSE	FALSE	FALSE	FALSE	FALSE	TRUE	FALSE	FALSE	FALSE	TRUE	FALSE	FALSE	TRUE
5	PCDHB10	NP_061753.1	0	0	-4.6135	-3.26685	-1.108	0.495773	-3.9395	-3.24275	-2.651	FALSE	FALSE	FALSE	FALSE	FALSE	FALSE	FALSE	FALSE	FALSE	FALSE	FALSE	FALSE	FALSE	FALSE
13	LATS2	NP_055387.2	0	0.0184211	-4.816	-3.49642	-2.35	0.504383	-4.288	-3.3595	-2.941	FALSE	FALSE	FALSE	FALSE	FALSE	FALSE	FALSE	FALSE	FALSE	FALSE	FALSE	FALSE	FALSE	FALSE
19	PRTN3	NP_002768.3	0	0	-4.2695	-3.26704	-1.7705	0.420074	-3.8354	-3.268	-2.7248	FALSE	FALSE	FALSE	FALSE	FALSE	FALSE	TRUE	FALSE	FALSE	FALSE	FALSE	FALSE	FALSE	FALSE
16	DYNC1LI2	NP_006132.1	0.0029769	0.117171	-5.1405	-3.88819	-1.8875	0.568577	-4.66815	-3.8725	-3.15735	FALSE	FALSE	FALSE	FALSE	FALSE	FALSE	FALSE	FALSE	FALSE	FALSE	FALSE	FALSE	FALSE	FALSE
22	HDHD5	NP_149061.1	0	0	-4.324	-3.35242	-2.1125	0.39346	-3.8765	-3.34725	-2.82325	FALSE	FALSE	FALSE	FALSE	FALSE	FALSE	TRUE	FALSE	FALSE	FALSE	FALSE	FALSE	FALSE	FALSE
17	MRPL12	NP_002940.2	0	0.0118846	-4.7925	-3.61208	-1.826	0.546174	-4.302	-3.644	-2.889	FALSE	FALSE	FALSE	FALSE	FALSE	FALSE	FALSE	FALSE	FALSE	FALSE	FALSE	FALSE	FALSE	FALSE
5	SLC22A4	NP_003050.2	0.026935	0.0636739	-6.078	-3.63919	-2.713	0.650164	-4.573	-3.5225	-2.886	FALSE	FALSE	FALSE	FALSE	FALSE	FALSE	TRUE	FALSE	FALSE	FALSE	FALSE	FALSE	FALSE	FALSE
19	AKT2	NP_001617.1	0.218261	0.14884	-6.208	-4.27762	-2.712	0.845047	-5.4765	-4.2325	-3.159	TRUE	FALSE	FALSE	FALSE	FALSE	FALSE	TRUE	FALSE	FALSE	FALSE	TRUE	FALSE	FALSE	TRUE
6	TINAG	NP_055279.3	0	0	-3.7905	-3.32765	-2.3535	0.218083	-3.6	-3.34675	-3.02515	FALSE	FALSE	FALSE	FALSE	FALSE	FALSE	FALSE	FALSE	FALSE	FALSE	FALSE	FALSE	FALSE	FALSE
14	GPATCH2L	NP_060396.2	0	0	-4.143	-3.67284	-2.869	0.206166	-3.9655	-3.6635	-3.4125	FALSE	FALSE	FALSE	TRUE	FALSE	FALSE	FALSE	FALSE	FALSE	FALSE	FALSE	FALSE	FALSE	FALSE
20	RRBP1	NP_004578.3	0	0	-4.234	-3.37456	-2.431	0.374772	-3.9455	-3.322	-2.909	FALSE	FALSE	FALSE	FALSE	FALSE	FALSE	FALSE	FALSE	FALSE	FALSE	FALSE	FALSE	FALSE	FALSE
3	ACKR4	NP_057641.1	0	0.00929769	-4.7505	-3.73952	-2.326	0.404865	-4.3128	-3.7025	-3.223	FALSE	FALSE	FALSE	FALSE	FALSE	FALSE	FALSE	FALSE	FALSE	FALSE	FALSE	FALSE	FALSE	FALSE
19	NLRP11	NP_659444.2	0	0	-4.275	-3.40813	-1.48	0.466762	-3.977	-3.465	-2.781	FALSE	FALSE	FALSE	FALSE	FALSE	FALSE	TRUE	FALSE	FALSE	FALSE	FALSE	FALSE	FALSE	FALSE
19	STRN4	NP_001034966.1	0.0427679	0.080265	-5.9305	-3.73912	-2.8245	0.659999	-4.7225	-3.593	-2.992	FALSE	FALSE	FALSE	FALSE	FALSE	FALSE	FALSE	FALSE	FALSE	FALSE	FALSE	FALSE	FALSE	FALSE
12	NUP107	NP_065134.1	0	0.00797448	-4.752	-3.77242	-2.1545	0.39849	-4.3323	-3.7475	-3.273	FALSE	FALSE	FALSE	FALSE	FALSE	FALSE	FALSE	FALSE	FALSE	FALSE	TRUE	FALSE	FALSE	TRUE
8	ZBTB10	NP_001099009.1	0.00666615	0.0619332	-5.301	-3.61619	-2.276	0.551041	-4.4835	-3.4495	-3.038	FALSE	FALSE	FALSE	FALSE	FALSE	FALSE	TRUE	FALSE	FALSE	FALSE	FALSE	FALSE	FALSE	FALSE
6	BACH2	NP_001164265.1	0.0057696	0.0880185	-5.2265	-3.75433	-2.3125	0.537591	-4.5936	-3.618	-3.157	FALSE	FALSE	FALSE	FALSE	FALSE	FALSE	TRUE	FALSE	FALSE	FALSE	FALSE	FALSE	FALSE	FALSE
6	TAAR9	NP_778227.3	0	0	-4.4785	-3.38476	-1.337	0.462358	-4.0025	-3.39025	-2.7865	FALSE	FALSE	FALSE	FALSE	FALSE	FALSE	FALSE	FALSE	FALSE	FALSE	FALSE	FALSE	FALSE	FALSE
9	SPATA31A1	NP_001078921.3	0.000363534	0.0109464	-5.2435	-3.60485	-1.736	0.440213	-4.1865	-3.6015	-3.0238	FALSE	FALSE	FALSE	FALSE	FALSE	FALSE	FALSE	FALSE	FALSE	FALSE	FALSE	FALSE	FALSE	FALSE
14	DHRS4L2	NP_932349.2	0	0	-3.858	-2.94013	0.1575	0.380867	-3.4945	-2.895	-2.5085	FALSE	FALSE	FALSE	FALSE	FALSE	FALSE	FALSE	FALSE	FALSE	FALSE	FALSE	FALSE	FALSE	FALSE
6	SLC17A4	NP_001273050.1	0	0.000120438	-4.8055	-3.56629	-1.516	0.493376	-4.225	-3.5675	-2.9135	FALSE	FALSE	FALSE	FALSE	FALSE	FALSE	FALSE	FALSE	FALSE	FALSE	FALSE	FALSE	FALSE	FALSE
6	POM121L2	NP_258443.2	0	0	-4.3005	-3.46216	-2.348	0.350278	-3.955	-3.444	-3.007	FALSE	FALSE	FALSE	FALSE	FALSE	FALSE	TRUE	FALSE	FALSE	FALSE	FALSE	FALSE	FALSE	FALSE
2	CALM2	NP_001292555.1	0.688445	0.111313	-7.1415	-5.48467	-1.9795	0.982099	-6.6576	-5.6095	-4.0596	FALSE	FALSE	FALSE	FALSE	FALSE	FALSE	FALSE	FALSE	FALSE	FALSE	FALSE	FALSE	FALSE	FALSE
14	BTBD6	NP_150374.2	0.0393808	0.0745511	-5.5765	-3.60901	-2.389	0.725869	-4.6835	-3.511	-2.6995	FALSE	FALSE	FALSE	FALSE	FALSE	FALSE	FALSE	FALSE	FALSE	FALSE	FALSE	FALSE	FALSE	FALSE
5	LOX	NP_002308.2	0	0.0595265	-4.87	-3.9724	-1.953	0.487441	-4.5395	-4.0595	-3.283	FALSE	FALSE	FALSE	FALSE	FALSE	FALSE	TRUE	FALSE	FALSE	FALSE	FALSE	FALSE	FALSE	FALSE
12	TNS2	NP_056134.2	0	0	-4.5735	-3.39934	-2.751	0.314144	-3.9045	-3.3015	-3.094	FALSE	FALSE	FALSE	FALSE	FALSE	FALSE	FALSE	FALSE	FALSE	FALSE	FALSE	FALSE	FALSE	FALSE
1	TMEM183A	NP_612400.3	0	0.00104963	-4.6475	-3.63495	-2.274	0.369527	-4.1666	-3.633	-3.1765	FALSE	FALSE	FALSE	FALSE	FALSE	FALSE	FALSE	FALSE	FALSE	FALSE	FALSE	FALSE	FALSE	FALSE
14	ARHGAP5	NP_001025226.1	3.62476e-05	0.0152603	-5.0795	-3.65349	-2.0745	0.381036	-4.119	-3.646	-3.18	FALSE	FALSE	FALSE	FALSE	FALSE	FALSE	FALSE	FALSE	FALSE	FALSE	FALSE	FALSE	FALSE	FALSE
16	LPCAT2	NP_060309.2	0	0.0094147	-4.826	-3.6808	-2.206	0.467668	-4.26825	-3.7085	-3.0325	FALSE	FALSE	FALSE	FALSE	FALSE	FALSE	FALSE	FALSE	FALSE	FALSE	FALSE	FALSE	FALSE	FALSE
11	MMP26	NP_068573.2	0	0	-4.2475	-3.3548	-2.036	0.400096	-3.93985	-3.31825	-2.85545	FALSE	FALSE	FALSE	FALSE	FALSE	FALSE	FALSE	FALSE	FALSE	FALSE	FALSE	FALSE	FALSE	FALSE
X	CYLC1	NP_066941.1	0.0568594	0.0419327	-5.913	-3.72084	-2.2585	0.59351	-4.608	-3.5795	-3.19645	FALSE	FALSE	FALSE	FALSE	FALSE	FALSE	FALSE	FALSE	FALSE	FALSE	FALSE	FALSE	FALSE	FALSE
5	IL31RA	NP_620586.3	0	0	-4.613	-3.68708	-1.8845	0.408177	-4.2555	-3.6675	-3.1705	FALSE	FALSE	FALSE	FALSE	FALSE	FALSE	FALSE	FALSE	FALSE	FALSE	FALSE	FALSE	FALSE	FALSE
7	ACTR3C	NP_001157931.1	0	0.0614035	-4.834	-3.74373	-2.776	0.536509	-4.5178	-3.7205	-3.03285	FALSE	FALSE	FALSE	FALSE	FALSE	FALSE	TRUE	FALSE	FALSE	FALSE	FALSE	FALSE	FALSE	FALSE
10	UNC5B	NP_734465.2	0	0	-4.2695	-3.37229	-2.503	0.276613	-3.7765	-3.343	-3.046	FALSE	FALSE	FALSE	FALSE	FALSE	FALSE	FALSE	FALSE	FALSE	FALSE	FALSE	FALSE	FALSE	FALSE
1	SH2D1B	NP_444512.2	0	0	-4.1175	-3.53421	-2.3195	0.280076	-3.9078	-3.541	-3.1505	FALSE	FALSE	FALSE	FALSE	FALSE	FALSE	TRUE	FALSE	FALSE	FALSE	FALSE	FALSE	FALSE	FALSE
20	FAM83D	NP_112181.3	0	0.000374158	-4.6705	-3.40681	-2.343	0.338178	-3.89265	-3.338	-3.0405	FALSE	FALSE	FALSE	FALSE	FALSE	FALSE	FALSE	FALSE	FALSE	FALSE	FALSE	FALSE	FALSE	FALSE
1	PHF13	NP_722519.2	0.143823	0.101608	-6.1185	-3.94761	-2.228	0.844921	-5.23695	-3.722	-3.012	FALSE	FALSE	FALSE	FALSE	FALSE	FALSE	TRUE	FALSE	FALSE	FALSE	FALSE	FALSE	FALSE	FALSE
1	SAMD11	NP_689699.3	0	0	-4.5325	-2.75324	0.186	0.438104	-3.137	-2.718	-2.274	FALSE	FALSE	FALSE	TRUE	FALSE	FALSE	FALSE	FALSE	FALSE	TRUE	FALSE	FALSE	FALSE	FALSE
12	PARP11	NP_065100.2	0	0	-4.2805	-3.66556	-2.8195	0.269	-4.043	-3.6505	-3.3189	FALSE	FALSE	FALSE	FALSE	FALSE	FALSE	FALSE	FALSE	FALSE	FALSE	FALSE	FALSE	FALSE	FALSE
4	PTTG2	NP_006598.2	0.00433777	0.021978	-5.1385	-3.53146	-1.739	0.476746	-4.1434	-3.4935	-2.9787	FALSE	FALSE	FALSE	FALSE	FALSE	FALSE	FALSE	FALSE	FALSE	FALSE	FALSE	FALSE	FALSE	FALSE
12	TESPA1	NP_001092285.1	0.0015319	0.0280118	-5.17	-3.61384	-2.3375	0.414708	-4.1365	-3.5675	-3.1534	FALSE	FALSE	FALSE	FALSE	FALSE	FALSE	FALSE	FALSE	FALSE	FALSE	FALSE	FALSE	FALSE	FALSE
12	TBX5	NP_000183.2	0.100636	0.0798149	-5.7345	-3.84813	-2.236	0.704155	-5.058	-3.529	-3.22525	TRUE	FALSE	TRUE	FALSE	FALSE	FALSE	TRUE	FALSE	FALSE	FALSE	TRUE	FALSE	FALSE	TRUE
1	TBX15	NP_689593.2	0.0546619	0.0760581	-5.371	-3.69909	-2.157	0.634774	-4.7866	-3.4145	-3.163	FALSE	TRUE	FALSE	FALSE	FALSE	FALSE	TRUE	FALSE	FALSE	FALSE	TRUE	FALSE	FALSE	TRUE
X	GLA	NP_000160.1	0.401632	0.105263	-7.558	-4.83878	-3.201	1.12952	-6.53875	-4.638	-3.48875	FALSE	FALSE	FALSE	FALSE	TRUE	FALSE	FALSE	FALSE	FALSE	FALSE	FALSE	FALSE	FALSE	FALSE
2	UGP2	NP_006750.3	0	0.110091	-5.022	-3.93438	-2.5745	0.50217	-4.6424	-3.922	-3.2755	FALSE	FALSE	FALSE	FALSE	FALSE	FALSE	FALSE	FALSE	FALSE	FALSE	TRUE	FALSE	FALSE	TRUE
X	NDUFA1	NP_004532.1	0	0.0451128	-4.885	-4.0228	-2.572	0.396255	-4.50705	-4.08	-3.48675	FALSE	FALSE	FALSE	FALSE	FALSE	FALSE	FALSE	FALSE	FALSE	FALSE	TRUE	FALSE	FALSE	TRUE
15	MAP2K5	NP_660143.1	0.0030747	0.134201	-5.1495	-3.91371	-1.8185	0.584154	-4.691	-3.926	-3.1153	FALSE	FALSE	FALSE	FALSE	FALSE	FALSE	TRUE	FALSE	FALSE	FALSE	FALSE	FALSE	FALSE	FALSE
19	ZNF606	NP_079303.2	0.0514541	0.0718239	-5.7945	-3.84219	-2.4095	0.59593	-4.7224	-3.702	-3.199	FALSE	FALSE	FALSE	FALSE	FALSE	FALSE	FALSE	FALSE	FALSE	FALSE	FALSE	FALSE	FALSE	FALSE
16	TPPP3	NP_057048.2	0	0.00965431	-4.955	-3.5833	-3.256	0.282918	-3.9755	-3.4735	-3.35	FALSE	FALSE	FALSE	FALSE	FALSE	FALSE	FALSE	FALSE	FALSE	FALSE	FALSE	FALSE	FALSE	FALSE
10	SFXN4	NP_998814.1	0	0	-4.3335	-3.60558	-2.26	0.354926	-4.079	-3.61	-3.1318	FALSE	FALSE	FALSE	FALSE	FALSE	FALSE	FALSE	FALSE	FALSE	FALSE	FALSE	FALSE	FALSE	FALSE
22	CBX6	NP_055107.3	0.103304	0.0709155	-5.687	-3.62095	-2.5665	0.799659	-5.0742	-3.3385	-2.858	FALSE	FALSE	FALSE	FALSE	FALSE	FALSE	TRUE	FALSE	FALSE	FALSE	FALSE	FALSE	FALSE	FALSE
6	FAM229B	NP_001028736.1	0	0	-4.3595	-3.32464	-2.284	0.324729	-3.69695	-3.3415	-2.91685	FALSE	FALSE	FALSE	FALSE	FALSE	FALSE	FALSE	FALSE	FALSE	FALSE	FALSE	FALSE	FALSE	FALSE
3	MITF	NP_000239.1	0.0631299	0.0797872	-5.9725	-3.7041	-2.2805	0.755356	-4.82905	-3.57525	-2.85515	TRUE	FALSE	TRUE	FALSE	FALSE	TRUE	TRUE	FALSE	FALSE	FALSE	TRUE	FALSE	FALSE	TRUE
10	CYP17A1	NP_000093.1	0	0.00033241	-4.641	-3.61971	-1.901	0.503045	-4.344	-3.6	-2.9772	FALSE	TRUE	FALSE	FALSE	FALSE	FALSE	TRUE	FALSE	FALSE	FALSE	FALSE	FALSE	FALSE	FALSE
5	SLC6A19	NP_001003841.1	0	0	-4.032	-3.37645	-1.985	0.302125	-3.7405	-3.4135	-2.951	FALSE	TRUE	FALSE	FALSE	FALSE	FALSE	TRUE	FALSE	FALSE	FALSE	FALSE	FALSE	FALSE	TRUE
8	FDFT1	NP_001274671.1	0	0	-4.4845	-2.84686	-1.836	0.63613	-3.781	-2.7525	-2.0705	FALSE	FALSE	FALSE	FALSE	FALSE	FALSE	FALSE	FALSE	FALSE	TRUE	TRUE	FALSE	FALSE	TRUE
2	COPS9	NP_612209.1	0	0	-4.502	-3.20082	-2.792	0.16401	-3.405	-3.183	-3.011	FALSE	FALSE	FALSE	FALSE	FALSE	FALSE	FALSE	FALSE	FALSE	FALSE	FALSE	FALSE	FALSE	FALSE
19	ZNF585B	NP_689492.3	0.0727909	0.0730324	-5.754	-3.77134	-2.157	0.716447	-4.85435	-3.5795	-3.0375	FALSE	FALSE	FALSE	FALSE	FALSE	FALSE	FALSE	FALSE	FALSE	FALSE	FALSE	FALSE	FALSE	FALSE
21	NCAM2	NP_004531.2	0.112626	0.0962351	-6.0405	-3.86924	-2.2835	0.833444	-5.123	-3.74875	-2.8475	FALSE	FALSE	FALSE	FALSE	FALSE	FALSE	TRUE	FALSE	FALSE	FALSE	FALSE	FALSE	FALSE	FALSE
10	MYPN	NP_115967.2	0	0	-4.5165	-3.43252	-1.78	0.296105	-3.8395	-3.385	-3.11	FALSE	FALSE	FALSE	FALSE	FALSE	FALSE	TRUE	FALSE	FALSE	FALSE	TRUE	FALSE	FALSE	TRUE
17	NDEL1	NP_001020750.1	0.0548246	0.104532	-5.676	-3.96577	-2.0455	0.592323	-4.8274	-3.85075	-3.3015	FALSE	FALSE	FALSE	FALSE	FALSE	FALSE	FALSE	FALSE	FALSE	FALSE	FALSE	FALSE	FALSE	FALSE
7	EZH2	NP_004447.2	0.479796	0.114466	-7.786	-4.98983	-2.3025	1.19551	-6.61815	-4.973	-3.381	FALSE	FALSE	FALSE	FALSE	FALSE	FALSE	FALSE	FALSE	FALSE	FALSE	TRUE	FALSE	FALSE	TRUE
1	TSPAN1	NP_005718.2	0	0.0135601	-4.751	-3.67677	-2.432	0.501348	-4.393	-3.644	-3.035	FALSE	FALSE	FALSE	FALSE	FALSE	FALSE	FALSE	FALSE	FALSE	FALSE	FALSE	FALSE	FALSE	FALSE
6	OR2W1	NP_112165.1	0	0.0200173	-4.8865	-3.60088	-2.25	0.512847	-4.3288	-3.5835	-2.9339	FALSE	FALSE	FALSE	FALSE	FALSE	FALSE	FALSE	FALSE	FALSE	FALSE	FALSE	FALSE	FALSE	FALSE
14	CDC42BPB	NP_006026.3	0.0862314	0.0581335	-6.098	-3.79105	-1.7955	0.741651	-4.9381	-3.6335	-2.987	FALSE	FALSE	FALSE	FALSE	FALSE	FALSE	TRUE	FALSE	FALSE	FALSE	TRUE	FALSE	FALSE	TRUE
22	SLC35E4	NP_001001479.1	0	0	-4.4395	-3.56276	-2.627	0.561406	-4.245	-3.6055	-2.78	FALSE	FALSE	FALSE	FALSE	FALSE	FALSE	TRUE	FALSE	FALSE	FALSE	FALSE	FALSE	FALSE	FALSE
1	NDUFS2	NP_004541.1	0.0103282	0.0591398	-5.2995	-3.76681	-1.967	0.48782	-4.49315	-3.63925	-3.28435	FALSE	TRUE	FALSE	FALSE	FALSE	FALSE	TRUE	FALSE	FALSE	FALSE	FALSE	FALSE	FALSE	FALSE
19	FZR1	NP_001129670.1	0.141553	0.0971986	-6.263	-3.89612	-2.3765	0.872654	-5.28235	-3.64825	-3.017	FALSE	FALSE	TRUE	FALSE	FALSE	FALSE	TRUE	FALSE	FALSE	FALSE	TRUE	FALSE	FALSE	TRUE
16	CPNE7	NP_055242.1	0	0.000619195	-4.6725	-3.1232	-2.339	0.45661	-3.8553	-2.9665	-2.678	FALSE	FALSE	FALSE	FALSE	FALSE	FALSE	TRUE	FALSE	FALSE	FALSE	FALSE	FALSE	FALSE	FALSE
2	FAM237A	NP_001096129.1	0	0	-4.2385	-3.42339	-2.02	0.290572	-3.7875	-3.439	-3.05295	FALSE	FALSE	FALSE	FALSE	FALSE	FALSE	FALSE	FALSE	FALSE	FALSE	FALSE	FALSE	FALSE	FALSE
6	TREM1	NP_061113.1	0	0	-4.165	-3.4897	-2.002	0.296123	-3.87935	-3.496	-3.1265	FALSE	FALSE	FALSE	FALSE	FALSE	FALSE	TRUE	FALSE	FALSE	FALSE	FALSE	FALSE	FALSE	FALSE
1	NSUN4	NP_950245.2	0	0	-3.736	-3.46709	-2.456	0.226024	-3.7115	-3.523	-3.1315	FALSE	FALSE	FALSE	FALSE	FALSE	FALSE	FALSE	FALSE	FALSE	FALSE	FALSE	FALSE	FALSE	FALSE
3	LRRC34	NP_001166250.1	0.00231348	0.0422209	-5.222	-3.78008	-2.657	0.4461	-4.431	-3.699	-3.2625	FALSE	FALSE	FALSE	FALSE	FALSE	FALSE	TRUE	FALSE	FALSE	FALSE	FALSE	FALSE	FALSE	FALSE
22	PPIL2	NP_680481.1	0.00619813	0.0488497	-5.533	-3.65028	-2.8155	0.526126	-4.4177	-3.5555	-3.0545	FALSE	FALSE	FALSE	FALSE	FALSE	FALSE	FALSE	FALSE	FALSE	FALSE	FALSE	FALSE	FALSE	FALSE
15	KIF7	NP_940927.2	0	0	-4.1025	-3.09431	-1.8515	0.267684	-3.4575	-3.0475	-2.832	FALSE	FALSE	FALSE	FALSE	FALSE	FALSE	FALSE	FALSE	FALSE	FALSE	TRUE	FALSE	FALSE	TRUE
8	PRDM14	NP_078780.1	0.000136705	0.134245	-5.058	-3.95514	-2.387	0.576327	-4.666	-4.0325	-3.1285	FALSE	FALSE	FALSE	FALSE	FALSE	FALSE	FALSE	FALSE	FALSE	FALSE	FALSE	FALSE	FALSE	FALSE
19	ZNF221	NP_001284517.1	0.00338409	0.0478226	-5.2625	-3.53161	-2.072	0.53917	-4.354	-3.3955	-2.948	FALSE	FALSE	FALSE	FALSE	FALSE	FALSE	FALSE	FALSE	FALSE	FALSE	FALSE	FALSE	FALSE	FALSE
12	USP44	NP_115523.2	0	0.0471976	-4.9315	-3.62516	-2.074	0.410906	-4.3145	-3.44775	-3.3005	FALSE	FALSE	FALSE	FALSE	FALSE	FALSE	TRUE	FALSE	FALSE	FALSE	FALSE	FALSE	FALSE	FALSE
4	SCARB2	NP_005497.1	0	0.0143959	-4.8195	-3.63719	-2.4005	0.493204	-4.3265	-3.6145	-2.9995	FALSE	TRUE	FALSE	FALSE	FALSE	FALSE	TRUE	FALSE	FALSE	FALSE	FALSE	FALSE	FALSE	FALSE
5	LIFR	NP_002301.1	0	0.000240877	-4.6585	-3.502	-2.076	0.428606	-4.12275	-3.4655	-2.973	FALSE	TRUE	FALSE	FALSE	FALSE	FALSE	FALSE	FALSE	FALSE	FALSE	TRUE	FALSE	FALSE	TRUE
20	NCOA5	NP_066018.1	0	0.00335538	-4.891	-3.45148	-2.455	0.350784	-3.926	-3.3855	-3.074	FALSE	FALSE	FALSE	FALSE	FALSE	FALSE	TRUE	FALSE	FALSE	FALSE	FALSE	FALSE	FALSE	FALSE
15	ST20-MTHFS	NP_001186689.1	0	0	-4.5965	-3.52122	-2.527	0.276341	-3.9544	-3.437	-3.2656	FALSE	FALSE	FALSE	FALSE	FALSE	FALSE	FALSE	FALSE	FALSE	FALSE	FALSE	FALSE	FALSE	FALSE
X	CYSLTR1	NP_006630.1	0	0	-4.483	-3.69547	-2.3085	0.424161	-4.2505	-3.711	-3.1163	FALSE	FALSE	FALSE	FALSE	FALSE	FALSE	FALSE	FALSE	FALSE	FALSE	FALSE	FALSE	FALSE	FALSE
2	RALB	NP_002872.1	0	0.0335753	-4.8175	-3.99773	-2.4025	0.43643	-4.51775	-4.07075	-3.359	FALSE	FALSE	FALSE	FALSE	FALSE	FALSE	TRUE	FALSE	FALSE	FALSE	FALSE	FALSE	FALSE	FALSE
2	CFAP221	NP_001257978.2	0	0	-4.589	-3.44967	-1.871	0.375898	-3.9185	-3.4595	-2.9595	FALSE	FALSE	FALSE	FALSE	FALSE	FALSE	FALSE	FALSE	FALSE	FALSE	FALSE	FALSE	FALSE	FALSE
12	APOBEC1	NP_001291495.1	0	0.015124	-4.779	-3.69696	-2.504	0.460892	-4.3785	-3.652	-3.12425	FALSE	FALSE	FALSE	FALSE	FALSE	FALSE	TRUE	FALSE	FALSE	FALSE	FALSE	FALSE	FALSE	FALSE
4	ADH1C	NP_000660.1	0	0.00185423	-4.751	-3.62567	-1.911	0.464491	-4.225	-3.6445	-3.005	FALSE	FALSE	FALSE	FALSE	FALSE	FALSE	TRUE	FALSE	FALSE	FALSE	FALSE	FALSE	FALSE	FALSE
5	GLRA1	NP_000162.2	0.0680202	0.116126	-5.552	-3.87129	-1.36	0.676989	-4.9177	-3.6645	-3.1655	FALSE	FALSE	FALSE	FALSE	FALSE	FALSE	FALSE	FALSE	FALSE	FALSE	TRUE	FALSE	FALSE	TRUE
X	TMEM31	NP_872347.2	0.000313283	0.00532581	-5.128	-3.64349	-1.5975	0.371017	-4.077	-3.6655	-3.1756	FALSE	FALSE	FALSE	FALSE	FALSE	FALSE	FALSE	FALSE	FALSE	FALSE	FALSE	FALSE	FALSE	FALSE
1	ZBTB40	NP_001077090.1	0	0	-4.257	-3.58551	-2.028	0.306075	-3.9923	-3.5815	-3.209	FALSE	FALSE	FALSE	FALSE	FALSE	FALSE	FALSE	FALSE	FALSE	FALSE	TRUE	FALSE	FALSE	TRUE
1	CD55	NP_000565.1	0	0	-3.753	-3.48259	-1.979	0.227293	-3.7275	-3.52825	-3.169	FALSE	FALSE	FALSE	FALSE	FALSE	FALSE	TRUE	FALSE	FALSE	FALSE	FALSE	FALSE	FALSE	FALSE
2	IL18RAP	NP_003844.1	0	0.00324219	-4.6675	-3.6578	-1.973	0.579893	-4.3899	-3.7065	-2.8216	FALSE	FALSE	FALSE	FALSE	FALSE	FALSE	TRUE	FALSE	FALSE	FALSE	FALSE	FALSE	FALSE	FALSE
17	SPEM2	NP_783861.3	0.00168759	0.00147664	-5.2755	-3.23727	-2.097	0.339806	-3.6185	-3.27	-2.825	FALSE	FALSE	FALSE	FALSE	FALSE	FALSE	FALSE	FALSE	FALSE	FALSE	FALSE	FALSE	FALSE	FALSE
3	CYP8B1	NP_004382.2	0	0.000756511	-4.735	-3.45968	-2.017	0.410367	-4.013	-3.4335	-2.9586	FALSE	FALSE	FALSE	FALSE	FALSE	FALSE	TRUE	FALSE	FALSE	FALSE	FALSE	FALSE	FALSE	FALSE
10	CALML5	NP_059118.2	0.00109649	0.00950292	-5.11	-3.19553	-1.8765	0.535894	-3.98075	-3.10175	-2.5945	FALSE	FALSE	FALSE	FALSE	FALSE	FALSE	FALSE	FALSE	FALSE	FALSE	FALSE	FALSE	FALSE	FALSE
2	CERKL	NP_001025482.1	0	0.00740823	-4.771	-3.54512	-2.035	0.438811	-4.181	-3.486	-3.013	FALSE	TRUE	FALSE	FALSE	FALSE	FALSE	FALSE	FALSE	FALSE	FALSE	FALSE	FALSE	FALSE	FALSE
21	KRTAP12-3	NP_941970.2	0	0	-4.088	-3.30816	-1.829	0.357809	-3.7315	-3.35025	-2.8293	FALSE	FALSE	FALSE	FALSE	FALSE	FALSE	FALSE	FALSE	FALSE	FALSE	FALSE	FALSE	FALSE	FALSE
4	ETFDH	NP_004444.2	0.00163572	0.0370442	-5.2385	-3.706	-2.532	0.462232	-4.3669	-3.6445	-3.1526	FALSE	TRUE	FALSE	FALSE	FALSE	FALSE	TRUE	FALSE	FALSE	FALSE	TRUE	FALSE	FALSE	TRUE
1	NT5C1A	NP_115915.1	0.00526316	0.032807	-5.323	-3.50992	-2.004	0.563077	-4.31755	-3.39775	-2.85545	FALSE	FALSE	FALSE	FALSE	FALSE	FALSE	FALSE	FALSE	FALSE	FALSE	FALSE	FALSE	FALSE	FALSE
6	LYRM2	NP_065199.1	0	0	-4.553	-3.32946	-1.9305	0.474798	-3.9838	-3.2805	-2.7585	FALSE	FALSE	FALSE	FALSE	FALSE	FALSE	FALSE	FALSE	FALSE	FALSE	FALSE	FALSE	FALSE	FALSE
1	KCNK2	NP_001017425.2	0.0266008	0.153335	-5.276	-4.00117	-2.827	0.579012	-4.8364	-3.97	-3.2401	FALSE	FALSE	FALSE	FALSE	FALSE	FALSE	FALSE	FALSE	FALSE	FALSE	FALSE	FALSE	FALSE	FALSE
X	H2BW2	NP_001157888.2	0	0	-4.0175	-3.13207	-1.955	0.356748	-3.6117	-3.124	-2.678	FALSE	FALSE	FALSE	FALSE	FALSE	FALSE	FALSE	FALSE	FALSE	FALSE	FALSE	FALSE	FALSE	FALSE
3	PLCL2	NP_055999.2	0.254565	0.109703	-7.229	-4.37897	-2.477	0.99382	-5.8773	-4.1815	-3.2139	FALSE	FALSE	FALSE	FALSE	FALSE	FALSE	TRUE	FALSE	FALSE	FALSE	FALSE	FALSE	FALSE	FALSE
1	CD160	NP_008984.1	0	0	-4.0855	-3.53992	-2.238	0.205767	-3.7745	-3.5505	-3.2879	FALSE	FALSE	FALSE	FALSE	FALSE	FALSE	TRUE	FALSE	FALSE	FALSE	FALSE	FALSE	FALSE	FALSE
12	RIC8B	NP_001317074.1	0	0.0454135	-4.942	-3.84275	-2.327	0.488063	-4.5078	-3.8315	-3.197	FALSE	FALSE	FALSE	FALSE	FALSE	FALSE	TRUE	FALSE	FALSE	FALSE	FALSE	FALSE	FALSE	FALSE
11	POU2AF1	NP_006226.2	0.0274973	0.0178303	-5.4865	-3.60547	-2.563	0.461869	-4.0765	-3.5335	-3.1482	FALSE	FALSE	FALSE	FALSE	FALSE	FALSE	FALSE	FALSE	FALSE	FALSE	FALSE	FALSE	FALSE	FALSE
X	CA5B	NP_009151.1	0	0	-4.3485	-3.75819	-2.7525	0.279306	-4.1065	-3.782	-3.374	FALSE	FALSE	FALSE	FALSE	FALSE	FALSE	FALSE	FALSE	FALSE	FALSE	FALSE	FALSE	FALSE	FALSE
11	ARAP1	NP_056057.2	0	0	-4.5975	-3.49826	-2.7995	0.354508	-4.014	-3.455	-3.076	FALSE	FALSE	FALSE	FALSE	FALSE	FALSE	TRUE	FALSE	FALSE	FALSE	FALSE	FALSE	FALSE	FALSE
14	CLBA1	NP_777551.2	0	0	-3.976	-3.26584	-2.0895	0.251331	-3.5537	-3.3025	-2.9238	FALSE	FALSE	FALSE	FALSE	FALSE	FALSE	FALSE	FALSE	FALSE	FALSE	FALSE	FALSE	FALSE	FALSE
17	CCR10	NP_057686.2	0.00245614	0.0484211	-5.186	-3.59351	-2.644	0.535637	-4.4195	-3.4635	-2.99595	FALSE	FALSE	FALSE	FALSE	FALSE	FALSE	FALSE	FALSE	FALSE	FALSE	FALSE	FALSE	FALSE	FALSE
5	SMAD5	NP_005894.3	0.162873	0.166785	-6.295	-4.15928	-2.373	0.813015	-5.2385	-4.19425	-3.0565	FALSE	FALSE	FALSE	FALSE	FALSE	FALSE	FALSE	FALSE	FALSE	FALSE	FALSE	FALSE	FALSE	FALSE
10	WASHC2C	NP_056077.2	0	0	-4.5	-3.67111	-2.0505	0.267003	-4.0055	-3.681	-3.34	FALSE	FALSE	FALSE	FALSE	FALSE	FALSE	FALSE	FALSE	FALSE	FALSE	FALSE	FALSE	FALSE	FALSE
17	SLC38A10	NP_001033073.1	0	0	-4.2285	-3.33908	-2.1535	0.373913	-3.87	-3.339	-2.8385	FALSE	FALSE	FALSE	FALSE	FALSE	FALSE	TRUE	FALSE	FALSE	FALSE	FALSE	FALSE	FALSE	FALSE
6	NCOA7	NP_001186548.1	0.0544465	0.0713436	-5.3625	-3.73616	-2.4995	0.598819	-4.7786	-3.474	-3.2185	FALSE	FALSE	FALSE	FALSE	FALSE	FALSE	TRUE	FALSE	FALSE	FALSE	FALSE	FALSE	FALSE	FALSE
X	MPP1	NP_002427.1	0.162848	0.115542	-6.439	-4.15328	-3.152	0.778453	-5.3577	-3.9565	-3.308	FALSE	FALSE	FALSE	FALSE	FALSE	FALSE	TRUE	FALSE	FALSE	FALSE	FALSE	FALSE	FALSE	FALSE
1	NPL	NP_110396.1	0	0.00163905	-4.7685	-3.73251	-3.051	0.302702	-4.1665	-3.697	-3.3555	FALSE	FALSE	FALSE	FALSE	FALSE	FALSE	FALSE	FALSE	FALSE	FALSE	FALSE	FALSE	FALSE	FALSE
1	RAB29	NP_003920.1	0	0.0121053	-4.7865	-3.57384	-2.206	0.500919	-4.2881	-3.54825	-2.933	FALSE	FALSE	FALSE	FALSE	FALSE	FALSE	TRUE	FALSE	FALSE	FALSE	FALSE	FALSE	FALSE	FALSE
7	MOSPD3	NP_001035186.1	0	0	-4.041	-3.29384	-2.488	0.299975	-3.73415	-3.248	-2.929	FALSE	FALSE	FALSE	FALSE	FALSE	FALSE	TRUE	FALSE	FALSE	FALSE	FALSE	FALSE	FALSE	FALSE
11	ANO3	NP_113606.2	0.0124756	0.0948668	-5.4665	-3.89625	-2.6425	0.507504	-4.637	-3.82775	-3.282	FALSE	FALSE	FALSE	FALSE	FALSE	FALSE	TRUE	FALSE	FALSE	FALSE	FALSE	FALSE	FALSE	FALSE
21	IGSF5	NP_001073913.1	0	0	-3.793	-3.40991	-2.335	0.203265	-3.6882	-3.4105	-3.1588	FALSE	FALSE	FALSE	FALSE	FALSE	FALSE	FALSE	FALSE	FALSE	FALSE	FALSE	FALSE	FALSE	FALSE
11	DRD2	NP_000786.1	0.0576509	0.169224	-5.656	-3.97938	-2.4225	0.673102	-4.922	-3.9225	-3.1331	TRUE	FALSE	FALSE	FALSE	FALSE	FALSE	FALSE	FALSE	FALSE	FALSE	FALSE	FALSE	FALSE	FALSE
11	TKFC	NP_056348.2	0	0	-4.404	-3.40364	-2.317	0.354664	-3.89225	-3.3785	-2.95425	FALSE	FALSE	FALSE	FALSE	FALSE	FALSE	FALSE	FALSE	FALSE	FALSE	TRUE	FALSE	FALSE	TRUE
9	CCDC171	NP_775821.2	0	0	-4.0405	-3.23862	-1.8325	0.328301	-3.695	-3.2315	-2.8245	FALSE	FALSE	FALSE	FALSE	FALSE	FALSE	TRUE	FALSE	FALSE	TRUE	FALSE	FALSE	FALSE	FALSE
11	SIK3	NP_079440.3	0.0055991	0.066383	-5.1945	-3.71708	-2.035	0.430889	-4.4395	-3.6095	-3.3265	FALSE	FALSE	FALSE	FALSE	FALSE	FALSE	TRUE	FALSE	FALSE	FALSE	FALSE	FALSE	FALSE	FALSE
22	MICAL3	NP_056056.2	0.00754563	0.043677	-5.466	-3.4955	-2.079	0.538585	-4.349	-3.3145	-2.9715	FALSE	FALSE	FALSE	FALSE	FALSE	FALSE	TRUE	FALSE	FALSE	FALSE	FALSE	FALSE	FALSE	FALSE
10	DPCD	NP_056263.1	0	0	-4.4065	-3.73294	-2.761	0.317403	-4.1575	-3.742	-3.3097	FALSE	FALSE	FALSE	FALSE	FALSE	FALSE	FALSE	FALSE	FALSE	FALSE	FALSE	FALSE	FALSE	FALSE
19	CLASRP	NP_008987.2	0.0159079	0.0804705	-5.3895	-3.46396	-2.0765	0.756108	-4.60165	-3.2675	-2.612	FALSE	FALSE	FALSE	FALSE	FALSE	FALSE	TRUE	FALSE	FALSE	FALSE	FALSE	FALSE	FALSE	FALSE
14	EIF5	NP_001960.2	0.118724	0.122358	-5.7895	-3.92304	-1.9295	0.834276	-5.1268	-3.8665	-2.8473	FALSE	FALSE	FALSE	FALSE	FALSE	FALSE	TRUE	FALSE	FALSE	FALSE	FALSE	FALSE	FALSE	FALSE
3	TMEM89	NP_001008270.1	0	0	-4.4205	-3.11634	-1.913	0.281383	-3.417	-3.124	-2.7765	FALSE	FALSE	FALSE	FALSE	FALSE	FALSE	TRUE	FALSE	FALSE	FALSE	FALSE	FALSE	FALSE	FALSE
7	CYCS	NP_061820.1	0.0177176	0.179781	-5.245	-3.9038	-1.9625	0.693593	-4.8242	-3.9275	-2.9454	TRUE	FALSE	FALSE	FALSE	FALSE	FALSE	FALSE	FALSE	FALSE	FALSE	FALSE	FALSE	FALSE	FALSE
14	DHRS4	NP_066284.2	0	0	-4.297	-3.28702	-1.796	0.430023	-3.856	-3.3065	-2.7113	FALSE	FALSE	FALSE	FALSE	FALSE	FALSE	FALSE	FALSE	FALSE	FALSE	FALSE	FALSE	FALSE	FALSE
16	FOXL1	NP_005241.1	0	0	-4.423	-3.10781	-1.632	0.562914	-3.98215	-2.9165	-2.4865	FALSE	FALSE	FALSE	FALSE	FALSE	FALSE	TRUE	FALSE	FALSE	FALSE	FALSE	FALSE	FALSE	FALSE
13	DOCK9	NP_056111.1	0.00335667	0.0156033	-5.359	-3.65519	-2.4395	0.380443	-4.109	-3.6455	-3.1775	FALSE	FALSE	FALSE	FALSE	FALSE	FALSE	TRUE	FALSE	FALSE	FALSE	FALSE	FALSE	FALSE	FALSE
16	GLIS2	NP_115964.2	0	0.105913	-5.0055	-3.48096	-2.082	0.611667	-4.65525	-3.311	-2.912	FALSE	TRUE	FALSE	FALSE	FALSE	FALSE	TRUE	FALSE	FALSE	FALSE	TRUE	FALSE	FALSE	TRUE
8	CDCA2	NP_689775.2	0	0	-4.503	-3.49214	-1.945	0.359987	-3.904	-3.56425	-2.981	FALSE	FALSE	FALSE	FALSE	FALSE	FALSE	FALSE	FALSE	FALSE	FALSE	FALSE	FALSE	FALSE	FALSE
1	NOL9	NP_078930.4	0.00172697	0.0388158	-5.367	-3.5999	-2.096	0.533326	-4.40355	-3.49025	-2.977	FALSE	FALSE	FALSE	FALSE	FALSE	FALSE	FALSE	FALSE	FALSE	FALSE	FALSE	FALSE	FALSE	FALSE
16	TRAP1	NP_057376.2	0	0.00052283	-4.7115	-3.08488	-2.256	0.540191	-3.8975	-2.9765	-2.46	FALSE	FALSE	FALSE	FALSE	FALSE	FALSE	TRUE	FALSE	FALSE	TRUE	FALSE	FALSE	FALSE	FALSE
3	CBLB	NP_733762.2	0.0918398	0.0834976	-6.0615	-3.81085	-2.0985	0.767609	-4.99275	-3.574	-3.015	FALSE	FALSE	FALSE	FALSE	FALSE	FALSE	TRUE	FALSE	FALSE	FALSE	FALSE	FALSE	FALSE	FALSE
8	DEPTOR	NP_073620.2	0.00317723	0.0446194	-5.294	-3.54964	-1.979	0.576933	-4.3751	-3.475	-2.8529	FALSE	FALSE	FALSE	FALSE	FALSE	FALSE	TRUE	FALSE	FALSE	FALSE	FALSE	FALSE	FALSE	FALSE
19	SBK2	NP_001357025.1	0	0	-4.221	-3.07716	-1.738	0.408765	-3.67945	-3.02175	-2.598	FALSE	FALSE	FALSE	FALSE	FALSE	FALSE	FALSE	FALSE	FALSE	FALSE	FALSE	FALSE	FALSE	FALSE
1	ATP2B4	NP_001001396.1	0.0439666	0.12853	-5.5875	-3.94519	-2.6815	0.597015	-4.8475	-3.8355	-3.238	FALSE	FALSE	FALSE	FALSE	FALSE	FALSE	TRUE	FALSE	FALSE	FALSE	FALSE	FALSE	FALSE	FALSE
22	SLC5A4	NP_055042.1	0	0.00453188	-4.8265	-3.59284	-2.0655	0.474257	-4.2095	-3.6035	-2.9575	FALSE	FALSE	FALSE	TRUE	FALSE	FALSE	FALSE	FALSE	FALSE	FALSE	FALSE	FALSE	FALSE	FALSE
19	ZNF329	NP_078896.3	0.0878269	0.0460123	-6.23	-3.76662	-2.5	0.721235	-4.92485	-3.483	-3.24215	FALSE	FALSE	FALSE	FALSE	FALSE	FALSE	TRUE	FALSE	FALSE	FALSE	FALSE	FALSE	FALSE	FALSE
19	ZNF573	NP_689573.3	0.00833333	0.0549123	-5.326	-3.61579	-2.789	0.475048	-4.3626	-3.4315	-3.19895	FALSE	FALSE	FALSE	FALSE	FALSE	FALSE	FALSE	FALSE	FALSE	FALSE	FALSE	FALSE	FALSE	FALSE
11	ZBTB44	NP_001288027.1	0.000809717	0.0825911	-5.1005	-3.8534	-2.893	0.454344	-4.5611	-3.7295	-3.3437	FALSE	FALSE	FALSE	FALSE	FALSE	FALSE	FALSE	FALSE	FALSE	FALSE	FALSE	FALSE	FALSE	FALSE
X	KLHL4	NP_476503.1	0.0579922	0.15039	-5.516	-4.12564	-3.3215	0.517983	-4.9	-4.03	-3.5	FALSE	FALSE	FALSE	FALSE	FALSE	FALSE	FALSE	FALSE	FALSE	FALSE	FALSE	FALSE	FALSE	FALSE
5	ZNF354C	NP_055409.1	0	0.0378145	-4.9275	-3.61711	-2.65	0.467969	-4.3176	-3.5105	-3.103	FALSE	FALSE	FALSE	FALSE	FALSE	FALSE	TRUE	FALSE	FALSE	FALSE	FALSE	FALSE	FALSE	FALSE
9	CAAP1	NP_079104.3	0	0.0117562	-4.731	-3.3223	-2.1435	0.452731	-3.9891	-3.2225	-2.8595	FALSE	FALSE	FALSE	FALSE	FALSE	FALSE	FALSE	FALSE	FALSE	FALSE	FALSE	FALSE	FALSE	FALSE
17	SGSH	NP_000190.1	0	0	-4.169	-3.3447	-2.4305	0.382883	-3.871	-3.3415	-2.8249	FALSE	TRUE	FALSE	FALSE	FALSE	FALSE	FALSE	FALSE	FALSE	FALSE	TRUE	FALSE	FALSE	TRUE
3	C3orf20	NP_001171886.1	0	0.000215703	-4.6645	-3.47264	-2.313	0.289404	-3.8345	-3.467	-3.116	FALSE	FALSE	FALSE	FALSE	FALSE	FALSE	FALSE	FALSE	FALSE	FALSE	FALSE	FALSE	FALSE	FALSE
16	VPS35L	NP_064710.5	0.0977604	0.0955207	-6.4525	-3.80763	-1.9985	0.851653	-5.0445	-3.681	-2.80395	FALSE	FALSE	FALSE	FALSE	FALSE	FALSE	FALSE	FALSE	FALSE	FALSE	FALSE	FALSE	FALSE	FALSE
4	FGFBP1	NP_005121.1	0	0.000248262	-4.672	-3.3095	-2.25	0.381078	-3.79765	-3.275	-2.847	FALSE	FALSE	FALSE	FALSE	FALSE	FALSE	FALSE	FALSE	FALSE	FALSE	FALSE	FALSE	FALSE	FALSE
10	CRTAC1	NP_060528.3	0.0137427	0.0633528	-5.465	-3.65482	-2.7195	0.58462	-4.51905	-3.549	-2.99245	FALSE	FALSE	FALSE	FALSE	FALSE	FALSE	TRUE	FALSE	FALSE	FALSE	FALSE	FALSE	FALSE	FALSE
19	PRR12	NP_065770.1	0	0.0350349	-5.03	-3.26077	-2.879	0.486984	-3.96	-3.056	-2.887	FALSE	FALSE	FALSE	FALSE	FALSE	FALSE	TRUE	FALSE	FALSE	FALSE	TRUE	TRUE	FALSE	TRUE
15	GCOM1	NP_001018101.1	0	0	-4.477	-3.43313	-2.1815	0.33718	-3.9129	-3.3835	-3.044	FALSE	FALSE	FALSE	FALSE	FALSE	FALSE	FALSE	FALSE	FALSE	FALSE	FALSE	FALSE	FALSE	FALSE
2	MREG	NP_060470.2	0	0	-3.655	-3.33747	-2.606	0.162257	-3.5305	-3.3585	-3.1185	FALSE	FALSE	FALSE	FALSE	FALSE	FALSE	FALSE	FALSE	FALSE	FALSE	FALSE	FALSE	FALSE	FALSE
X	FAM47B	NP_689844.2	0.059386	0.0280702	-5.79	-3.58968	-0.21	0.638463	-4.4594	-3.454	-3.0975	FALSE	FALSE	FALSE	FALSE	FALSE	FALSE	FALSE	FALSE	FALSE	FALSE	FALSE	FALSE	FALSE	FALSE
17	TRIM37	NP_056109.1	0	0.161632	-4.9425	-3.75748	-2.044	0.621371	-4.7926	-3.524	-3.1305	FALSE	TRUE	FALSE	FALSE	FALSE	FALSE	FALSE	FALSE	FALSE	FALSE	TRUE	FALSE	FALSE	TRUE
3	NICN1	NP_115692.1	0	0	-3.643	-3.37082	-3.0185	0.0966819	-3.49	-3.3715	-3.251	FALSE	FALSE	FALSE	FALSE	FALSE	FALSE	TRUE	FALSE	FALSE	FALSE	FALSE	FALSE	FALSE	FALSE
6	PRRC2A	NP_542417.2	0	0	-4.114	-3.15018	-2.4115	0.27616	-3.5355	-3.123	-2.8197	FALSE	FALSE	FALSE	FALSE	FALSE	FALSE	TRUE	FALSE	FALSE	FALSE	FALSE	FALSE	FALSE	FALSE
16	PDZD9	NP_001350448.1	0	0	-3.86	-3.4815	-2.5425	0.204493	-3.7315	-3.5075	-3.202	FALSE	FALSE	FALSE	FALSE	FALSE	FALSE	FALSE	FALSE	FALSE	FALSE	FALSE	FALSE	FALSE	FALSE
19	ZNF441	NP_689568.2	0.0921381	0.102113	-5.8685	-3.91504	-2.8695	0.728359	-5.0181	-3.7395	-3.0975	FALSE	FALSE	FALSE	FALSE	FALSE	FALSE	FALSE	FALSE	FALSE	FALSE	FALSE	FALSE	FALSE	FALSE
Y	PCDH11Y	NP_116755.1	0.0391909	0.337281	-5.2135	-4.44397	-2.4455	0.405968	-4.9745	-4.4515	-3.9024	FALSE	FALSE	FALSE	FALSE	FALSE	FALSE	FALSE	TRUE	FALSE	FALSE	FALSE	FALSE	FALSE	FALSE
4	GRPEL1	NP_079472.1	0	0.0162838	-4.9515	-3.50724	-1.8315	0.550436	-4.2425	-3.4795	-2.7745	FALSE	FALSE	FALSE	FALSE	FALSE	FALSE	FALSE	FALSE	FALSE	FALSE	FALSE	FALSE	FALSE	FALSE
14	RDH11	NP_057110.3	0.000188644	0.0375401	-5.09	-3.62373	-2.317	0.5217	-4.389	-3.5635	-2.987	FALSE	FALSE	FALSE	FALSE	FALSE	FALSE	FALSE	FALSE	FALSE	FALSE	FALSE	FALSE	FALSE	FALSE
11	PATE2	NP_997720.1	0	0	-3.553	-3.37938	-2.1845	0.160027	-3.52	-3.425	-3.159	FALSE	FALSE	FALSE	FALSE	FALSE	FALSE	FALSE	FALSE	FALSE	FALSE	FALSE	FALSE	FALSE	FALSE
3	DIPK2A	NP_775823.1	0	0.00422108	-4.692	-3.476	-2.2825	0.387881	-4.047	-3.4115	-3.045	FALSE	FALSE	FALSE	FALSE	FALSE	FALSE	FALSE	FALSE	FALSE	FALSE	FALSE	FALSE	FALSE	FALSE
6	RXRB	NP_001257330.1	0.107047	0.222123	-5.6265	-4.25217	-2.363	0.646192	-5.0695	-4.3195	-3.3225	FALSE	FALSE	FALSE	FALSE	FALSE	FALSE	FALSE	FALSE	FALSE	FALSE	FALSE	FALSE	FALSE	FALSE
19	PLK5	NP_001230008.1	0	0	-4.021	-3.1335	-1.8335	0.370394	-3.67	-3.1165	-2.67	FALSE	FALSE	FALSE	FALSE	FALSE	FALSE	FALSE	FALSE	FALSE	FALSE	FALSE	FALSE	FALSE	FALSE
3	AP2M1	NP_001298127.1	0.402751	0.17405	-6.8115	-4.84055	-2.641	0.801291	-5.9546	-4.8085	-3.7801	FALSE	FALSE	FALSE	FALSE	FALSE	FALSE	FALSE	FALSE	FALSE	FALSE	TRUE	FALSE	FALSE	TRUE
9	TXNDC8	NP_001003936.1	0	0	-3.9145	-3.4227	-2.6365	0.21333	-3.70875	-3.41725	-3.1545	FALSE	FALSE	FALSE	FALSE	FALSE	FALSE	FALSE	FALSE	FALSE	FALSE	FALSE	FALSE	FALSE	FALSE
11	TIMM8B	NP_036591.3	0	0.000666223	-4.7585	-3.36458	-2.0915	0.36089	-3.814	-3.379	-2.8975	FALSE	FALSE	FALSE	FALSE	FALSE	FALSE	FALSE	FALSE	FALSE	FALSE	FALSE	FALSE	FALSE	FALSE
19	SSC5D	NP_001138422.1	0	0.00296698	-4.8495	-3.28999	-2.415	0.360401	-3.85	-3.1675	-2.964	FALSE	FALSE	FALSE	FALSE	FALSE	FALSE	FALSE	FALSE	FALSE	FALSE	FALSE	FALSE	FALSE	FALSE
1	TAFA3	NP_877436.1	0	0	-4.439	-3.52223	-2.2305	0.377876	-3.98625	-3.5615	-2.9965	FALSE	FALSE	FALSE	FALSE	FALSE	FALSE	FALSE	FALSE	FALSE	FALSE	FALSE	FALSE	FALSE	FALSE
7	TYW1B	NP_001138912.2	0	0.0313684	-4.991	-3.60154	-1.2855	0.45184	-4.281	-3.481	-3.1265	FALSE	FALSE	FALSE	FALSE	FALSE	FALSE	TRUE	FALSE	FALSE	FALSE	FALSE	FALSE	FALSE	FALSE
14	ENTPD5	NP_001308917.1	0	0.000138504	-4.632	-3.7024	-2.1195	0.438425	-4.24305	-3.74625	-3.10045	FALSE	FALSE	FALSE	FALSE	FALSE	FALSE	TRUE	FALSE	FALSE	FALSE	FALSE	FALSE	FALSE	FALSE
19	KIR3DL1	NP_037421.2	0	0.0025385	-4.793	-3.20047	-0.981	0.68564	-4.039	-3.29	-2.2355	FALSE	FALSE	FALSE	TRUE	FALSE	FALSE	TRUE	TRUE	FALSE	FALSE	FALSE	FALSE	FALSE	FALSE
10	LDB1	NP_001106878.1	0	0.00372867	-4.7675	-3.83557	-2.488	0.402649	-4.3389	-3.88	-3.2811	FALSE	FALSE	FALSE	FALSE	FALSE	FALSE	FALSE	FALSE	FALSE	FALSE	FALSE	FALSE	FALSE	FALSE
4	MAPK10	NP_002744.1	0.270604	0.148248	-6.4875	-4.47988	-3.1995	0.795509	-5.6157	-4.3985	-3.4599	FALSE	TRUE	FALSE	FALSE	FALSE	FALSE	FALSE	FALSE	FALSE	FALSE	TRUE	FALSE	FALSE	TRUE
22	RASD2	NP_055125.2	0	0.0274985	-4.9865	-3.77603	-2.369	0.482913	-4.39975	-3.794	-3.11585	FALSE	FALSE	FALSE	FALSE	FALSE	FALSE	TRUE	FALSE	FALSE	FALSE	FALSE	FALSE	FALSE	FALSE
8	LAPTM4B	NP_060877.4	0	0.0577016	-5.037	-3.6255	0.2295	0.720197	-4.51895	-3.682	-2.6635	FALSE	FALSE	FALSE	FALSE	FALSE	FALSE	TRUE	FALSE	FALSE	FALSE	FALSE	FALSE	FALSE	FALSE
1	A3GALT2	NP_001073907.1	0	0	-4.18	-3.09097	-0.592	0.372568	-3.63675	-3.0215	-2.6975	FALSE	FALSE	FALSE	FALSE	FALSE	FALSE	FALSE	FALSE	FALSE	FALSE	FALSE	FALSE	FALSE	FALSE
X	AKAP14	NP_001008534.1	0	0	-4.602	-4.01115	-3.195	0.223825	-4.2929	-4.0275	-3.7221	FALSE	FALSE	FALSE	FALSE	FALSE	FALSE	FALSE	FALSE	FALSE	FALSE	FALSE	FALSE	FALSE	FALSE
6	MDGA1	NP_705691.1	0	0.00255606	-4.8035	-3.50028	-2.2955	0.343063	-3.953	-3.4785	-3.081	FALSE	FALSE	FALSE	FALSE	FALSE	FALSE	FALSE	FALSE	FALSE	FALSE	FALSE	FALSE	FALSE	FALSE
3	SLC12A8	NP_078904.4	0.00025243	0.0204468	-5.167	-3.58871	-1.7595	0.481501	-4.2824	-3.5125	-3.0265	FALSE	FALSE	FALSE	FALSE	FALSE	FALSE	TRUE	FALSE	FALSE	FALSE	FALSE	FALSE	FALSE	FALSE
17	FAM117A	NP_110429.1	0	0	-4.3325	-3.5191	-2.4855	0.378379	-4.0995	-3.4485	-3.073	FALSE	FALSE	FALSE	FALSE	FALSE	FALSE	TRUE	FALSE	FALSE	FALSE	FALSE	FALSE	FALSE	FALSE
7	CHPF2	NP_061888.1	0	0	-4.3105	-3.24898	-2.269	0.317216	-3.687	-3.218	-2.8655	FALSE	FALSE	FALSE	TRUE	FALSE	FALSE	FALSE	FALSE	FALSE	FALSE	FALSE	FALSE	FALSE	FALSE
18	ABHD3	NP_612213.2	0	0	-4.5745	-3.68299	-1.838	0.461018	-4.269	-3.7165	-3.0405	FALSE	FALSE	FALSE	FALSE	FALSE	FALSE	TRUE	FALSE	FALSE	FALSE	FALSE	FALSE	FALSE	FALSE
1	TAS1R2	NP_689418.2	0	0	-4.5845	-3.28842	-1.6875	0.502427	-3.9925	-3.2425	-2.6675	FALSE	FALSE	FALSE	FALSE	FALSE	FALSE	FALSE	FALSE	FALSE	FALSE	FALSE	FALSE	FALSE	FALSE
7	SH2B2	NP_001346158.1	0	0	-4.3395	-3.23738	-2.2105	0.350154	-3.7555	-3.178	-2.839	FALSE	FALSE	FALSE	FALSE	FALSE	FALSE	FALSE	FALSE	FALSE	FALSE	FALSE	FALSE	FALSE	FALSE
14	DDHD1	NP_001153619.1	0.0214643	0.0553514	-5.9355	-3.62741	-2.367	0.599468	-4.49385	-3.4925	-2.975	FALSE	FALSE	FALSE	FALSE	FALSE	FALSE	FALSE	FALSE	FALSE	FALSE	TRUE	FALSE	FALSE	TRUE
9	BNC2	NP_060107.3	0	0.00789207	-4.784	-3.3902	-2.253	0.504728	-4.181	-3.225	-2.8895	FALSE	FALSE	FALSE	FALSE	FALSE	FALSE	TRUE	FALSE	FALSE	FALSE	TRUE	FALSE	FALSE	TRUE
5	NDUFA2	NP_002479.1	0	0.00231348	-4.7595	-3.30642	-2.175	0.515259	-4.0191	-3.253	-2.6624	FALSE	TRUE	FALSE	FALSE	FALSE	FALSE	FALSE	FALSE	FALSE	FALSE	FALSE	FALSE	FALSE	FALSE
2	TEX37	NP_689883.1	0	0	-3.7455	-3.25337	-1.604	0.224362	-3.47455	-3.33375	-2.895	FALSE	FALSE	FALSE	FALSE	FALSE	FALSE	FALSE	FALSE	FALSE	FALSE	FALSE	FALSE	FALSE	FALSE
1	PYHIN1	NP_945148.1	0.00429646	0.00684748	-5.9475	-3.54766	-1.8565	0.446007	-4.0745	-3.5555	-2.9825	FALSE	FALSE	FALSE	FALSE	FALSE	FALSE	TRUE	FALSE	FALSE	FALSE	FALSE	FALSE	FALSE	FALSE
11	MPZL3	NP_938016.1	0	0	-4.4015	-3.48067	-2.308	0.37992	-4.04005	-3.456	-3.01435	FALSE	FALSE	FALSE	FALSE	FALSE	FALSE	TRUE	FALSE	FALSE	FALSE	FALSE	FALSE	FALSE	FALSE
12	FAR2	NP_001258712.1	0.0194557	0.0949168	-5.4065	-3.80587	-1.7545	0.62667	-4.6705	-3.7765	-2.9945	FALSE	FALSE	FALSE	FALSE	FALSE	FALSE	TRUE	FALSE	FALSE	FALSE	FALSE	FALSE	FALSE	FALSE
1	RGS16	NP_002919.3	0	0	-4.2555	-3.54317	-2.187	0.341266	-3.9961	-3.544	-3.091	FALSE	FALSE	FALSE	FALSE	FALSE	FALSE	TRUE	FALSE	FALSE	FALSE	FALSE	FALSE	FALSE	FALSE
19	UBA52	NP_001307946.1	0.547784	0.103878	-7.201	-5.06428	-1.7415	1.16124	-6.50335	-5.2405	-3.36295	FALSE	FALSE	FALSE	FALSE	FALSE	FALSE	FALSE	FALSE	FALSE	FALSE	FALSE	FALSE	FALSE	FALSE
4	UGT2B11	NP_001064.1	0.00495356	0.0244582	-5.457	-3.16931	-0.5025	0.685772	-4.15605	-3.0655	-2.3655	FALSE	FALSE	FALSE	FALSE	FALSE	FALSE	FALSE	FALSE	FALSE	FALSE	FALSE	FALSE	FALSE	FALSE
X	TNMD	NP_071427.2	0	0	-4.2985	-3.9608	-3.1125	0.189615	-4.2065	-3.981	-3.7031	FALSE	FALSE	FALSE	FALSE	FALSE	FALSE	FALSE	FALSE	FALSE	FALSE	FALSE	FALSE	FALSE	FALSE
7	PARP12	NP_073587.1	0	0.0142022	-4.9935	-3.47069	-2.1335	0.482675	-4.18905	-3.388	-2.91445	FALSE	FALSE	FALSE	FALSE	FALSE	FALSE	TRUE	FALSE	FALSE	FALSE	FALSE	FALSE	FALSE	FALSE
5	CCDC127	NP_660308.1	0	0.00264174	-4.898	-3.38671	-2.5845	0.278886	-3.7175	-3.3385	-3.113	FALSE	FALSE	FALSE	FALSE	FALSE	FALSE	FALSE	FALSE	FALSE	FALSE	FALSE	FALSE	FALSE	FALSE
X	TSPAN6	NP_003261.1	0	0.0806711	-4.922	-3.95138	-2.1915	0.488045	-4.59	-3.9655	-3.2875	FALSE	FALSE	FALSE	FALSE	FALSE	FALSE	FALSE	FALSE	FALSE	FALSE	FALSE	FALSE	FALSE	FALSE
10	ALDH18A1	NP_002851.2	0.00682023	0.0940677	-5.366	-3.80043	-2.6605	0.567051	-4.619	-3.713	-3.109	FALSE	TRUE	FALSE	FALSE	FALSE	FALSE	TRUE	FALSE	FALSE	FALSE	TRUE	FALSE	FALSE	TRUE
X	AMER1	NP_689637.3	0	9.32357e-05	-4.729	-3.65495	-2.3075	0.21183	-3.87	-3.672	-3.4135	FALSE	FALSE	FALSE	FALSE	FALSE	FALSE	FALSE	FALSE	FALSE	FALSE	TRUE	TRUE	FALSE	TRUE
17	PSMD12	NP_002807.1	0.00696948	0.0829128	-5.3225	-3.81837	-2.357	0.569603	-4.5835	-3.8095	-3.0665	FALSE	FALSE	FALSE	FALSE	FALSE	FALSE	FALSE	FALSE	FALSE	FALSE	TRUE	FALSE	FALSE	TRUE
1	TNFRSF18	NP_683699.1	0	0	-4.5895	-3.27296	-2.199	0.366394	-3.8236	-3.19275	-2.89495	FALSE	FALSE	FALSE	FALSE	FALSE	FALSE	FALSE	FALSE	FALSE	FALSE	FALSE	FALSE	FALSE	FALSE
16	CMTM4	NP_848933.1	0	0	-4.1195	-3.63372	-2.387	0.295756	-3.98955	-3.67075	-3.23395	FALSE	FALSE	FALSE	FALSE	FALSE	FALSE	FALSE	FALSE	FALSE	FALSE	FALSE	FALSE	FALSE	FALSE
19	CDC42EP5	NP_659494.2	0	0	-3.527	-2.94812	-2.106	0.280535	-3.37195	-2.9065	-2.61655	FALSE	FALSE	FALSE	FALSE	FALSE	FALSE	FALSE	FALSE	FALSE	FALSE	FALSE	FALSE	FALSE	FALSE
22	SEC14L2	NP_001191133.1	0.0235006	0.0820073	-5.411	-3.70961	-1.648	0.587963	-4.6437	-3.543	-3.0987	FALSE	FALSE	FALSE	FALSE	FALSE	FALSE	TRUE	FALSE	FALSE	FALSE	FALSE	FALSE	FALSE	FALSE
17	SMG8	NP_060619.4	0	0.000945477	-4.9725	-3.57178	-2.4555	0.273002	-3.9008	-3.5805	-3.2245	FALSE	FALSE	FALSE	FALSE	FALSE	FALSE	TRUE	FALSE	FALSE	FALSE	TRUE	FALSE	FALSE	TRUE
15	GOLGA6L9	NP_937824.3	0	0.0102339	-4.9775	-3.72089	-1.727	0.379299	-4.19705	-3.7315	-3.24695	FALSE	FALSE	FALSE	FALSE	FALSE	FALSE	FALSE	FALSE	FALSE	FALSE	FALSE	FALSE	FALSE	FALSE
19	CHERP	NP_006378.3	0.0367036	0.0366459	-6.082	-3.7066	-2.517	0.554639	-4.41365	-3.55825	-3.169	FALSE	FALSE	FALSE	FALSE	FALSE	FALSE	FALSE	FALSE	FALSE	FALSE	FALSE	FALSE	FALSE	FALSE
19	AXL	NP_068713.2	0	0	-4.3545	-3.57524	-2.7915	0.353102	-4.09645	-3.55	-3.123	FALSE	FALSE	FALSE	FALSE	FALSE	FALSE	FALSE	FALSE	FALSE	FALSE	FALSE	FALSE	FALSE	FALSE
8	PLEKHF2	NP_078889.1	0	0.0130067	-4.81	-3.89511	-2.612	0.401766	-4.44475	-3.90075	-3.3665	FALSE	FALSE	FALSE	FALSE	FALSE	FALSE	FALSE	FALSE	FALSE	FALSE	FALSE	FALSE	FALSE	FALSE
5	PRR16	NP_001287712.1	0	0.00035926	-4.629	-3.32365	-2.335	0.349242	-3.7768	-3.2855	-2.9198	FALSE	FALSE	FALSE	FALSE	FALSE	FALSE	TRUE	FALSE	FALSE	FALSE	FALSE	FALSE	FALSE	FALSE
12	PGAM5	NP_001164014.1	0	0	-4.411	-3.36421	-1.5865	0.54897	-4.198	-3.30375	-2.694	FALSE	FALSE	FALSE	FALSE	FALSE	FALSE	FALSE	FALSE	FALSE	FALSE	FALSE	FALSE	FALSE	FALSE
17	RAB37	NP_001006639.1	0.00161943	0.0607287	-5.1665	-3.62495	-1.864	0.618472	-4.4966	-3.5805	-2.8307	FALSE	FALSE	FALSE	FALSE	FALSE	FALSE	FALSE	FALSE	FALSE	FALSE	FALSE	FALSE	FALSE	FALSE
12	MUCL1	NP_477521.1	0	0	-4.2995	-3.07031	-1.8755	0.447949	-3.7444	-2.996	-2.5398	FALSE	FALSE	FALSE	FALSE	FALSE	FALSE	FALSE	FALSE	FALSE	FALSE	FALSE	FALSE	FALSE	FALSE
8	PNOC	NP_006219.1	0	0	-4.0015	-3.44831	-2.2855	0.281854	-3.8535	-3.444	-3.08815	FALSE	FALSE	FALSE	FALSE	FALSE	FALSE	FALSE	FALSE	FALSE	FALSE	FALSE	FALSE	FALSE	FALSE
22	SOX10	NP_008872.1	0	0	-4.594	-3.73936	-2.671	0.421025	-4.35615	-3.70075	-3.2045	TRUE	FALSE	TRUE	FALSE	FALSE	FALSE	FALSE	FALSE	FALSE	FALSE	TRUE	TRUE	FALSE	TRUE
19	PLPPR2	NP_073574.2	0.158087	0.114483	-6.1845	-4.01623	-2.4565	0.889265	-5.338	-3.87525	-2.9735	FALSE	FALSE	FALSE	FALSE	FALSE	FALSE	FALSE	FALSE	FALSE	FALSE	FALSE	FALSE	FALSE	FALSE
9	XPA	NP_000371.1	0	0	-4.487	-3.48687	-1.294	0.380847	-3.8984	-3.5595	-2.967	FALSE	TRUE	FALSE	FALSE	FALSE	FALSE	FALSE	FALSE	FALSE	FALSE	TRUE	FALSE	FALSE	TRUE
11	KRTAP5-9	NP_005544.4	0	0	-4.559	-3.5909	-0.328	0.498919	-4.1607	-3.6355	-2.9776	FALSE	FALSE	FALSE	FALSE	FALSE	FALSE	FALSE	FALSE	FALSE	FALSE	FALSE	FALSE	FALSE	FALSE
4	PLRG1	NP_002660.1	0.19144	0.166715	-6.251	-4.32646	-2.873	0.778106	-5.4215	-4.30225	-3.2665	FALSE	FALSE	FALSE	FALSE	FALSE	FALSE	TRUE	FALSE	FALSE	FALSE	FALSE	FALSE	FALSE	FALSE
11	PHF21A	NP_001095272.1	0.00566802	0.0995142	-5.311	-3.88912	-2.157	0.559345	-4.625	-3.8865	-3.1545	FALSE	FALSE	FALSE	FALSE	FALSE	FALSE	TRUE	FALSE	FALSE	FALSE	TRUE	TRUE	FALSE	TRUE
6	POPDC3	NP_071756.2	0	0.0104475	-4.82	-3.71542	-1.749	0.500487	-4.3179	-3.7755	-3.0001	FALSE	FALSE	FALSE	FALSE	FALSE	FALSE	FALSE	FALSE	FALSE	FALSE	FALSE	FALSE	FALSE	FALSE
2	ACVR1C	NP_660302.2	0.042924	0.0987135	-5.297	-3.82912	-0.238	0.635525	-4.79905	-3.713	-3.1205	FALSE	FALSE	FALSE	FALSE	FALSE	FALSE	FALSE	FALSE	FALSE	FALSE	FALSE	FALSE	FALSE	FALSE
20	BTBD3	NP_055777.1	0.146448	0.162125	-6.373	-4.27662	-1.7545	0.717277	-5.2517	-4.2375	-3.3673	FALSE	FALSE	FALSE	FALSE	FALSE	FALSE	FALSE	FALSE	FALSE	FALSE	FALSE	FALSE	FALSE	FALSE
8	DEFB107B	NP_001035795.1	0.768588	0.229741	-5.363	-5.14818	-4.4925	0.132337	-5.3037	-5.1735	-4.9506	FALSE	FALSE	FALSE	FALSE	FALSE	FALSE	FALSE	TRUE	FALSE	FALSE	FALSE	FALSE	FALSE	FALSE
X	MAGEB3	NP_002356.2	0.365355	0.0793732	-7.68	-4.64942	-2.884	1.29533	-6.613	-4.359	-3.1365	FALSE	FALSE	FALSE	FALSE	FALSE	FALSE	FALSE	FALSE	FALSE	FALSE	FALSE	FALSE	FALSE	FALSE
12	HOXC8	NP_073149.1	0	0	-3.9715	-3.38331	-2.7045	0.256157	-3.7795	-3.298	-3.104	FALSE	FALSE	FALSE	FALSE	FALSE	FALSE	FALSE	FALSE	FALSE	FALSE	FALSE	FALSE	FALSE	FALSE
14	ADSS1	NP_954634.1	0.0162817	0.0578064	-5.4375	-3.47878	-2.4185	0.606174	-4.472	-3.2235	-2.9435	FALSE	FALSE	FALSE	FALSE	FALSE	FALSE	FALSE	FALSE	FALSE	FALSE	FALSE	FALSE	FALSE	FALSE
6	C6orf58	NP_001010905.1	0	0	-4.403	-3.44361	-2.6535	0.181932	-3.651	-3.453	-3.213	FALSE	FALSE	FALSE	FALSE	FALSE	FALSE	FALSE	FALSE	FALSE	FALSE	FALSE	FALSE	FALSE	FALSE
1	AGRN	NP_940978.2	0	0	-3.8135	-3.36251	-2.5595	0.189921	-3.6415	-3.3425	-3.1285	FALSE	TRUE	FALSE	FALSE	FALSE	FALSE	TRUE	FALSE	FALSE	TRUE	FALSE	FALSE	FALSE	FALSE
2	COX7A2L	NP_001305965.1	0	0	-4.2055	-3.23336	-2.155	0.506423	-3.90695	-3.2185	-2.53555	FALSE	FALSE	FALSE	FALSE	FALSE	FALSE	FALSE	FALSE	FALSE	FALSE	FALSE	FALSE	FALSE	FALSE
17	LRRC37A3	NP_955372.2	0.205078	0.104809	-6.547	-4.4111	-2.3005	0.759956	-5.6434	-4.194	-3.615	FALSE	FALSE	FALSE	FALSE	FALSE	FALSE	FALSE	TRUE	FALSE	FALSE	FALSE	FALSE	FALSE	FALSE
X	MED12	NP_005111.2	0.0143772	0.106254	-5.192	-4.36927	-3.07	0.230976	-4.649	-4.348	-4.113	FALSE	FALSE	FALSE	FALSE	FALSE	FALSE	FALSE	FALSE	FALSE	FALSE	TRUE	TRUE	TRUE	TRUE
11	OR8I2	NP_001003750.1	0	0.0058289	-4.8085	-3.32944	-1.605	0.648679	-4.2315	-3.3265	-2.4755	FALSE	FALSE	FALSE	FALSE	FALSE	FALSE	TRUE	FALSE	FALSE	FALSE	FALSE	FALSE	FALSE	FALSE
1	NME7	NP_037462.1	0	0	-4.4085	-3.49577	-2.459	0.322069	-3.9555	-3.475	-3.0979	FALSE	FALSE	FALSE	FALSE	FALSE	FALSE	TRUE	FALSE	FALSE	FALSE	FALSE	FALSE	FALSE	FALSE
1	YOD1	NP_061036.3	0	0	-4.3445	-3.5228	-2.0405	0.440405	-4.1654	-3.5005	-2.9625	FALSE	FALSE	FALSE	FALSE	FALSE	FALSE	FALSE	FALSE	FALSE	FALSE	FALSE	FALSE	FALSE	FALSE
8	PPP1R3B	NP_001188258.1	0	0	-4.0625	-3.11445	-1.6785	0.468773	-3.8025	-3.05875	-2.54725	FALSE	TRUE	FALSE	FALSE	FALSE	FALSE	FALSE	FALSE	FALSE	FALSE	FALSE	FALSE	FALSE	FALSE
1	OR4F5	NP_001005484.2	0.1572	0.164148	-5.949	-4.31527	-2.62	0.657401	-5.2615	-4.2775	-3.497	FALSE	FALSE	FALSE	FALSE	FALSE	FALSE	FALSE	TRUE	FALSE	FALSE	FALSE	FALSE	FALSE	FALSE
1	BCL10	NP_003912.1	0.0251514	0.0454122	-5.5025	-3.82431	-2.114	0.502994	-4.45735	-3.79475	-3.23915	FALSE	FALSE	FALSE	FALSE	FALSE	FALSE	FALSE	FALSE	FALSE	FALSE	FALSE	FALSE	FALSE	FALSE
12	P2RX2	NP_777362.1	0	0	-4.0405	-3.30436	-2.5005	0.302694	-3.71985	-3.29825	-2.9055	FALSE	FALSE	FALSE	FALSE	FALSE	FALSE	FALSE	FALSE	FALSE	FALSE	FALSE	FALSE	FALSE	FALSE
17	KCNAB3	NP_004723.2	0	0.019883	-4.9695	-3.6949	-2.2105	0.474006	-4.322	-3.703	-3.0719	FALSE	FALSE	FALSE	FALSE	FALSE	FALSE	FALSE	FALSE	FALSE	FALSE	FALSE	FALSE	FALSE	FALSE
11	FJX1	NP_055159.2	0	0	-4.1635	-3.22372	-1.916	0.348183	-3.70035	-3.2075	-2.7798	FALSE	FALSE	FALSE	FALSE	FALSE	FALSE	FALSE	FALSE	FALSE	FALSE	FALSE	FALSE	FALSE	FALSE
16	ROGDI	NP_078865.1	0.000224921	0.00517319	-5.2425	-3.02077	-1.964	0.382835	-3.523	-2.9475	-2.64	FALSE	FALSE	FALSE	FALSE	FALSE	FALSE	FALSE	FALSE	FALSE	FALSE	TRUE	FALSE	FALSE	TRUE
7	HOXA2	NP_006726.1	0	0.00839706	-4.681	-3.5511	-2.1585	0.523801	-4.404	-3.4235	-2.9694	FALSE	TRUE	FALSE	FALSE	FALSE	FALSE	FALSE	FALSE	FALSE	FALSE	FALSE	FALSE	FALSE	FALSE
17	SARM1	NP_055892.2	0	0	-4.1885	-3.42433	-2.3085	0.309082	-3.85	-3.406	-3.03505	FALSE	FALSE	FALSE	FALSE	FALSE	FALSE	TRUE	FALSE	FALSE	FALSE	FALSE	FALSE	FALSE	FALSE
12	CEP83	NP_057206.2	0	0	-4.295	-3.70115	-2.137	0.340304	-4.1285	-3.7325	-3.2395	FALSE	FALSE	FALSE	FALSE	FALSE	FALSE	TRUE	FALSE	FALSE	FALSE	TRUE	FALSE	FALSE	TRUE
7	FIGNL1	NP_001036227.1	0	0.0928475	-4.9765	-3.67664	-1.673	0.538653	-4.5905	-3.4245	-3.1825	FALSE	FALSE	FALSE	FALSE	FALSE	FALSE	FALSE	FALSE	FALSE	FALSE	FALSE	FALSE	FALSE	FALSE
14	NUDT14	NP_803877.2	0	0	-4.4015	-3.51264	-2.138	0.404922	-4.0549	-3.5085	-2.974	FALSE	FALSE	FALSE	FALSE	FALSE	FALSE	FALSE	FALSE	FALSE	FALSE	FALSE	FALSE	FALSE	FALSE
11	CD3D	NP_000723.1	0.0010057	0.0737513	-5.106	-3.66622	-1.753	0.585101	-4.5219	-3.6165	-2.9687	FALSE	TRUE	FALSE	FALSE	FALSE	FALSE	FALSE	FALSE	FALSE	FALSE	FALSE	FALSE	FALSE	FALSE
X	ASMTL	NP_004183.2	0	0	-4.235	-2.96466	-1.537	0.393869	-3.4835	-2.952	-2.4708	FALSE	FALSE	FALSE	FALSE	FALSE	FALSE	FALSE	FALSE	FALSE	FALSE	FALSE	FALSE	FALSE	FALSE
11	PPP6R3	NP_001157632.1	0.0764904	0.0984741	-6.2125	-3.86952	-1.865	0.721663	-4.92275	-3.739	-3.0465	FALSE	FALSE	FALSE	FALSE	FALSE	FALSE	TRUE	FALSE	FALSE	FALSE	FALSE	FALSE	FALSE	FALSE
22	LGALS2	NP_006489.1	0	0	-3.8375	-3.32377	-2.4765	0.258903	-3.68205	-3.3105	-2.98595	FALSE	FALSE	FALSE	FALSE	FALSE	FALSE	FALSE	FALSE	FALSE	FALSE	FALSE	FALSE	FALSE	FALSE
11	SCN4B	NP_777594.1	0	0	-4.207	-3.53866	-1.618	0.370803	-3.9875	-3.59175	-3.031	TRUE	FALSE	FALSE	FALSE	FALSE	FALSE	FALSE	FALSE	FALSE	FALSE	FALSE	FALSE	FALSE	FALSE
19	CLPP	NP_006003.1	0	0.0450742	-4.981	-3.7343	-2.3965	0.58448	-4.4838	-3.7885	-2.8866	FALSE	FALSE	FALSE	FALSE	FALSE	FALSE	FALSE	FALSE	FALSE	FALSE	TRUE	FALSE	FALSE	TRUE
1	GABRD	NP_000806.2	0	0.0617409	-4.939	-3.56933	-2.346	0.625946	-4.50185	-3.44575	-2.8255	FALSE	FALSE	FALSE	FALSE	FALSE	FALSE	FALSE	FALSE	FALSE	FALSE	FALSE	FALSE	FALSE	FALSE
X	ARX	NP_620689.1	0.239879	0.0960093	-6.177	-4.3257	-2.5125	0.8796	-5.7735	-4.08325	-3.35725	FALSE	FALSE	FALSE	FALSE	FALSE	FALSE	FALSE	FALSE	FALSE	FALSE	TRUE	FALSE	FALSE	TRUE
10	ATRNL1	NP_997186.1	0	0	-4.21	-3.61112	-2.166	0.308062	-4.053	-3.5815	-3.2345	FALSE	FALSE	FALSE	FALSE	FALSE	FALSE	TRUE	FALSE	FALSE	FALSE	FALSE	FALSE	FALSE	FALSE
17	USP43	NP_694942.3	0.0496085	0.0593716	-5.889	-3.67272	-2.3535	0.636526	-4.67965	-3.519	-3.0215	FALSE	FALSE	FALSE	FALSE	FALSE	FALSE	FALSE	FALSE	FALSE	FALSE	FALSE	FALSE	FALSE	FALSE
5	DAB2	NP_001334.2	0	0.0110089	-5.0335	-3.59361	-1.8435	0.433349	-4.22745	-3.52	-3.11205	FALSE	FALSE	FALSE	FALSE	FALSE	FALSE	TRUE	FALSE	FALSE	FALSE	FALSE	FALSE	FALSE	FALSE
3	CMTM6	NP_060271.1	0	0.000637959	-4.633	-3.68071	-1.599	0.507779	-4.3503	-3.6795	-3.01	FALSE	FALSE	FALSE	FALSE	FALSE	FALSE	TRUE	FALSE	FALSE	FALSE	FALSE	FALSE	FALSE	FALSE
11	OR9G1	NP_001005213.1	0.0526316	0.151989	-5.552	-3.91899	-1.0665	0.754523	-4.9082	-3.9545	-2.8951	FALSE	FALSE	FALSE	FALSE	FALSE	FALSE	TRUE	FALSE	FALSE	FALSE	FALSE	FALSE	FALSE	FALSE
1	SYPL2	NP_001035799.1	0	0	-4.6005	-3.55834	-2.073	0.478343	-4.17535	-3.589	-2.9035	FALSE	FALSE	FALSE	FALSE	FALSE	FALSE	TRUE	FALSE	FALSE	FALSE	FALSE	FALSE	FALSE	FALSE
20	SERINC3	NP_006802.1	0.000113921	0.0161768	-5.069	-3.45777	-2.0965	0.580634	-4.28415	-3.397	-2.736	FALSE	FALSE	FALSE	FALSE	FALSE	FALSE	FALSE	FALSE	FALSE	FALSE	FALSE	FALSE	FALSE	FALSE
10	BAMBI	NP_036474.1	0	0	-3.293	-3.16168	-2.5515	0.0830765	-3.231	-3.19	-3.05805	FALSE	FALSE	FALSE	FALSE	FALSE	FALSE	TRUE	FALSE	FALSE	FALSE	FALSE	FALSE	FALSE	FALSE
3	BDH1	NP_004042.1	0.000926612	0.0331727	-5.271	-3.55129	-2.338	0.530594	-4.33525	-3.48	-2.90925	FALSE	FALSE	FALSE	FALSE	FALSE	FALSE	FALSE	FALSE	FALSE	FALSE	FALSE	FALSE	FALSE	FALSE
2	PLEKHA3	NP_061964.3	0.00161943	0.101215	-5.133	-3.95035	-2.6495	0.50092	-4.62105	-3.9425	-3.31045	FALSE	FALSE	FALSE	FALSE	FALSE	FALSE	FALSE	FALSE	FALSE	FALSE	FALSE	FALSE	FALSE	FALSE
3	VPS8	NP_056118.2	0	0	-4.422	-3.65426	-2.3235	0.297314	-4.0315	-3.664	-3.2745	FALSE	FALSE	FALSE	FALSE	FALSE	FALSE	FALSE	FALSE	FALSE	FALSE	FALSE	FALSE	FALSE	FALSE
4	NDST3	NP_004775.1	0.126649	0.108591	-5.864	-3.98625	-1.6765	0.78782	-5.17525	-3.8355	-3.0815	FALSE	FALSE	FALSE	FALSE	FALSE	FALSE	FALSE	FALSE	FALSE	FALSE	FALSE	FALSE	FALSE	FALSE
12	TUBA1B	NP_006073.2	0.876509	0.0549252	-8.485	-6.36353	-1.7675	1.04508	-7.56485	-6.5555	-4.8948	FALSE	FALSE	FALSE	FALSE	FALSE	FALSE	FALSE	FALSE	FALSE	FALSE	FALSE	FALSE	FALSE	FALSE
5	SPRY4	NP_112226.2	0	0	-4.467	-3.18343	-2.6615	0.268575	-3.60195	-3.093	-2.9465	FALSE	FALSE	FALSE	FALSE	FALSE	FALSE	TRUE	FALSE	FALSE	FALSE	FALSE	FALSE	FALSE	FALSE
6	MCHR2	NP_001035269.1	0	0.0021123	-4.75	-3.56285	-2.266	0.483859	-4.23	-3.546	-2.919	FALSE	FALSE	FALSE	FALSE	FALSE	FALSE	TRUE	FALSE	FALSE	FALSE	FALSE	FALSE	FALSE	FALSE
13	RNF17	NP_112567.2	0.0238224	0.0486556	-5.8905	-3.77859	-2.351	0.514053	-4.45665	-3.723	-3.179	FALSE	FALSE	FALSE	FALSE	FALSE	FALSE	FALSE	FALSE	FALSE	FALSE	FALSE	FALSE	FALSE	FALSE
4	NIPAL1	NP_997213.1	0	0	-4.589	-3.82158	-2.685	0.343918	-4.2688	-3.8445	-3.3515	FALSE	FALSE	FALSE	FALSE	FALSE	FALSE	TRUE	FALSE	FALSE	FALSE	FALSE	FALSE	FALSE	FALSE
8	R3HCC1	NP_001129580.2	0.000368913	0.0197983	-5.0665	-3.22027	-2.2425	0.481889	-3.95435	-3.05525	-2.797	FALSE	FALSE	FALSE	FALSE	FALSE	FALSE	FALSE	FALSE	FALSE	FALSE	FALSE	FALSE	FALSE	FALSE
3	IRAK2	NP_001561.3	0	0	-4.006	-3.40192	-1.898	0.322021	-3.81115	-3.42125	-2.99035	FALSE	FALSE	FALSE	FALSE	FALSE	FALSE	TRUE	FALSE	FALSE	FALSE	FALSE	FALSE	FALSE	FALSE
5	MACIR	NP_149988.1	0	0	-4.3535	-3.53766	-2.1095	0.22142	-3.77435	-3.568	-3.2535	FALSE	FALSE	FALSE	FALSE	FALSE	FALSE	FALSE	FALSE	FALSE	FALSE	FALSE	FALSE	FALSE	FALSE
9	BRINP1	NP_055433.2	0	0	-4.423	-3.51447	-2.546	0.356268	-4.019	-3.4915	-3.073	FALSE	FALSE	FALSE	FALSE	FALSE	FALSE	FALSE	FALSE	FALSE	FALSE	FALSE	FALSE	FALSE	FALSE
7	OR2A14	NP_001001659.1	0.00882964	0.0550554	-5.3965	-3.44068	-1.347	0.71052	-4.456	-3.381	-2.5495	FALSE	FALSE	FALSE	FALSE	FALSE	FALSE	FALSE	FALSE	FALSE	FALSE	FALSE	FALSE	FALSE	FALSE
6	CENPW	NP_001273454.1	0	0	-4.132	-3.49157	-2.3	0.252766	-3.7764	-3.521	-3.16235	FALSE	FALSE	FALSE	FALSE	FALSE	FALSE	TRUE	FALSE	FALSE	FALSE	FALSE	FALSE	FALSE	FALSE
16	KIF22	NP_015556.1	0	0.023084	-5.0035	-3.54004	-2.396	0.507571	-4.3035	-3.43525	-2.955	FALSE	FALSE	FALSE	FALSE	FALSE	FALSE	FALSE	FALSE	FALSE	FALSE	TRUE	FALSE	FALSE	TRUE
16	WFDC1	NP_001269395.1	0	0	-3.0665	-2.90119	-2.0255	0.134306	-3.02545	-2.9335	-2.7385	FALSE	FALSE	FALSE	FALSE	FALSE	FALSE	FALSE	FALSE	FALSE	FALSE	FALSE	FALSE	FALSE	FALSE
17	TMEM88	NP_981956.1	0	0	-4.223	-3.25454	-2.9905	0.268567	-3.6845	-3.15	-3.0125	FALSE	FALSE	FALSE	FALSE	FALSE	FALSE	TRUE	FALSE	FALSE	FALSE	FALSE	FALSE	FALSE	FALSE
14	PPP1R13B	NP_056131.2	0	0	-4.5655	-3.39214	-2.549	0.276398	-3.8035	-3.3355	-3.0925	FALSE	FALSE	FALSE	FALSE	FALSE	FALSE	TRUE	FALSE	FALSE	FALSE	FALSE	FALSE	FALSE	FALSE
19	ZNF615	NP_001308249.1	0	0.0254914	-4.9255	-3.65925	-2.5565	0.43151	-4.2818	-3.5885	-3.159	FALSE	FALSE	FALSE	FALSE	FALSE	FALSE	FALSE	FALSE	FALSE	FALSE	FALSE	FALSE	FALSE	FALSE
4	PPP3CA	NP_000935.1	0.58365	0.110327	-7.277	-5.20006	-2.928	1.11365	-6.5861	-5.3595	-3.5054	FALSE	FALSE	FALSE	FALSE	FALSE	FALSE	TRUE	FALSE	FALSE	FALSE	TRUE	FALSE	FALSE	TRUE
7	SLC25A13	NP_055066.1	0	0	-3.8905	-3.46898	-2.3565	0.225213	-3.767	-3.4735	-3.1675	FALSE	TRUE	FALSE	FALSE	FALSE	FALSE	FALSE	FALSE	FALSE	FALSE	FALSE	FALSE	FALSE	FALSE
2	OTOS	NP_683764.1	0	0	-4.478	-3.32085	-2.4835	0.269792	-3.6475	-3.3005	-3.0224	FALSE	FALSE	FALSE	FALSE	FALSE	FALSE	TRUE	FALSE	FALSE	FALSE	FALSE	FALSE	FALSE	FALSE
19	C19orf38	NP_001129954.1	0	0.00331911	-4.7765	-3.42033	-1.616	0.46545	-4.0318	-3.423	-2.81785	FALSE	FALSE	FALSE	FALSE	FALSE	FALSE	FALSE	FALSE	FALSE	FALSE	FALSE	FALSE	FALSE	FALSE
7	AIMP2	NP_006294.2	0	0	-4.281	-3.1239	-1.8555	0.44014	-3.7715	-3.047	-2.6155	FALSE	FALSE	FALSE	FALSE	FALSE	FALSE	TRUE	FALSE	FALSE	FALSE	FALSE	FALSE	FALSE	FALSE
9	TTC39B	NP_689787.3	0.037594	0.0546822	-6.086	-3.5358	-2.806	0.703037	-4.5767	-3.337	-2.822	FALSE	FALSE	FALSE	FALSE	FALSE	FALSE	TRUE	FALSE	FALSE	FALSE	FALSE	FALSE	FALSE	FALSE
22	TMEM121B	NP_001156551.1	0	0	-4.2695	-3.18866	-2.329	0.338436	-3.67125	-3.1125	-2.84225	FALSE	FALSE	FALSE	FALSE	FALSE	FALSE	FALSE	FALSE	FALSE	FALSE	FALSE	FALSE	FALSE	FALSE
21	KRTAP8-1	NP_787053.1	0	0	-3.755	-3.42211	-2.777	0.15287	-3.6215	-3.431	-3.2364	FALSE	FALSE	FALSE	FALSE	FALSE	FALSE	TRUE	FALSE	FALSE	FALSE	FALSE	FALSE	FALSE	FALSE
3	RPL15	NP_002939.2	0.20722	0.112703	-6.4785	-4.06928	-1.347	1.08923	-5.608	-4.036	-2.6288	FALSE	FALSE	FALSE	FALSE	FALSE	FALSE	TRUE	FALSE	FALSE	FALSE	FALSE	FALSE	FALSE	FALSE
X	RPL36A-HNRNPH2	NP_001186902.2	0.583244	0.241139	-6.029	-5.08788	-1.8775	0.536888	-5.7169	-5.17525	-4.37975	FALSE	FALSE	FALSE	FALSE	FALSE	FALSE	FALSE	FALSE	FALSE	FALSE	FALSE	FALSE	FALSE	FALSE
6	RPP40	NP_006629.2	0	0	-4.0805	-3.41017	-2.4295	0.218042	-3.6805	-3.4225	-3.1225	FALSE	FALSE	FALSE	FALSE	FALSE	FALSE	FALSE	FALSE	FALSE	FALSE	FALSE	FALSE	FALSE	FALSE
5	C5orf47	NP_001138426.1	0	0	-4.095	-3.23645	-1.6055	0.265658	-3.5438	-3.26	-2.9135	FALSE	FALSE	FALSE	FALSE	FALSE	FALSE	FALSE	FALSE	FALSE	FALSE	FALSE	FALSE	FALSE	FALSE
19	TNNT1	NP_003274.3	0.00246119	0.0407043	-5.543	-3.60811	-2.702	0.52864	-4.384	-3.51775	-2.99205	FALSE	TRUE	FALSE	FALSE	FALSE	FALSE	FALSE	FALSE	FALSE	FALSE	FALSE	FALSE	FALSE	FALSE
19	PTH2	NP_848544.1	0	0	-3.9305	-3.09371	-2.1155	0.265578	-3.42525	-3.097	-2.7595	FALSE	FALSE	FALSE	FALSE	FALSE	FALSE	FALSE	FALSE	FALSE	FALSE	FALSE	FALSE	FALSE	FALSE
19	ZNF134	NP_003426.3	0	0.0169525	-4.928	-3.50034	-2.5115	0.449666	-4.1729	-3.393	-3.0151	FALSE	FALSE	FALSE	FALSE	FALSE	FALSE	TRUE	FALSE	FALSE	FALSE	FALSE	FALSE	FALSE	FALSE
12	CCDC62	NP_958843.2	0	0	-4.407	-3.54808	-2.284	0.270993	-3.921	-3.522	-3.2315	FALSE	FALSE	FALSE	FALSE	FALSE	FALSE	TRUE	FALSE	FALSE	FALSE	FALSE	FALSE	FALSE	FALSE
10	PRAP1	NP_660203.3	0	0.00746547	-4.8405	-3.52334	-2.7285	0.251678	-3.8066	-3.497	-3.2684	FALSE	FALSE	FALSE	FALSE	FALSE	FALSE	FALSE	FALSE	FALSE	FALSE	FALSE	FALSE	FALSE	FALSE
17	KCNJ16	NP_001257351.1	0	0	-4.058	-3.41305	-2.4555	0.315041	-3.824	-3.42475	-2.97885	FALSE	FALSE	FALSE	FALSE	FALSE	FALSE	TRUE	FALSE	FALSE	FALSE	FALSE	FALSE	FALSE	FALSE
12	CCDC77	NP_001123618.1	0	0	-4.283	-3.46138	-2.562	0.281599	-3.8436	-3.4555	-3.0984	FALSE	FALSE	FALSE	FALSE	FALSE	FALSE	FALSE	FALSE	FALSE	FALSE	FALSE	FALSE	FALSE	FALSE
17	MPP3	NP_001923.2	0.0932263	0.0687987	-6.3585	-3.75593	-2.315	0.80128	-4.9947	-3.53575	-2.932	FALSE	FALSE	TRUE	FALSE	FALSE	FALSE	TRUE	FALSE	FALSE	FALSE	FALSE	FALSE	FALSE	FALSE
19	LAIR2	NP_002279.2	0	0	-4.2065	-3.31231	-2.1625	0.351481	-3.82015	-3.296	-2.8605	FALSE	FALSE	FALSE	FALSE	FALSE	FALSE	FALSE	TRUE	FALSE	FALSE	FALSE	FALSE	FALSE	FALSE
1	PHGDH	NP_006614.2	0	0	-4.3055	-3.59774	-2.61	0.319117	-4.0095	-3.609	-3.16545	FALSE	TRUE	FALSE	FALSE	FALSE	FALSE	TRUE	FALSE	FALSE	FALSE	TRUE	FALSE	FALSE	TRUE
6	COQ3	NP_059117.3	0.000216591	0.0350877	-5.1125	-3.67644	-2.043	0.477781	-4.3666	-3.605	-3.1301	FALSE	FALSE	FALSE	FALSE	FALSE	FALSE	FALSE	FALSE	FALSE	FALSE	FALSE	FALSE	FALSE	FALSE
3	ERICH6	NP_689607.2	0	0	-4.078	-3.39395	-2.117	0.263883	-3.687	-3.4255	-3.0595	FALSE	FALSE	FALSE	FALSE	FALSE	FALSE	FALSE	FALSE	FALSE	FALSE	FALSE	FALSE	FALSE	FALSE
X	SUV39H1	NP_003164.1	0.238208	0.112366	-6.4995	-4.50049	-3.22	0.739771	-5.6905	-4.25	-3.7355	FALSE	FALSE	FALSE	FALSE	FALSE	FALSE	FALSE	FALSE	FALSE	FALSE	FALSE	FALSE	FALSE	FALSE
17	SLC47A1	NP_060712.2	0.0439798	0.0913242	-5.801	-3.83383	-2.304	0.638117	-4.75345	-3.7505	-3.0695	FALSE	FALSE	FALSE	FALSE	FALSE	FALSE	TRUE	FALSE	FALSE	FALSE	FALSE	FALSE	FALSE	FALSE
11	ARHGEF12	NP_056128.1	0.0715043	0.0695534	-5.8355	-3.86193	-1.998	0.638613	-4.866	-3.722	-3.184	FALSE	FALSE	FALSE	FALSE	FALSE	FALSE	TRUE	FALSE	FALSE	FALSE	FALSE	FALSE	FALSE	FALSE
5	MTMR12	NP_001035536.1	0.0411657	0.096823	-6.132	-3.89181	-1.83	0.632683	-4.7415	-3.8505	-3.094	FALSE	FALSE	FALSE	FALSE	FALSE	FALSE	FALSE	FALSE	FALSE	FALSE	FALSE	FALSE	FALSE	FALSE
1	CATSPER4	NP_937770.1	0	0	-4.17	-3.3442	-1.9995	0.360616	-3.8605	-3.301	-2.8901	FALSE	FALSE	FALSE	FALSE	FALSE	FALSE	FALSE	FALSE	FALSE	FALSE	FALSE	FALSE	FALSE	FALSE
15	MESP1	NP_061140.1	0	0	-4.0345	-2.87505	-1.596	0.382389	-3.27725	-2.859	-2.4845	FALSE	FALSE	FALSE	FALSE	FALSE	FALSE	FALSE	FALSE	FALSE	FALSE	FALSE	FALSE	FALSE	FALSE
7	RSPH10B	NP_775836.4	0	0.245814	-4.837	-4.43397	-3.18	0.278743	-4.6925	-4.5245	-4.0059	FALSE	FALSE	FALSE	FALSE	FALSE	FALSE	FALSE	TRUE	FALSE	FALSE	FALSE	FALSE	FALSE	FALSE
16	TUBB3	NP_006077.2	0.322052	0.155606	-6.8035	-4.56527	-2.6375	0.926857	-5.8519	-4.544	-3.3025	TRUE	FALSE	FALSE	FALSE	FALSE	FALSE	FALSE	FALSE	FALSE	FALSE	TRUE	FALSE	FALSE	TRUE
19	RNF225	NP_001182064.1	0	0	-3.9175	-3.16373	-1.9965	0.398898	-3.692	-3.1125	-2.6735	FALSE	FALSE	FALSE	FALSE	FALSE	FALSE	FALSE	FALSE	FALSE	FALSE	FALSE	FALSE	FALSE	FALSE
3	TKT	NP_001128527.1	0.00176025	0.0467347	-5.2245	-3.52347	-2.779	0.588333	-4.40695	-3.404	-2.844	FALSE	FALSE	FALSE	FALSE	FALSE	FALSE	TRUE	FALSE	FALSE	FALSE	TRUE	FALSE	FALSE	TRUE
X	G6PD	NP_000393.4	0.214949	0.0990712	-7.341	-4.21749	-2.642	0.945296	-5.66205	-3.962	-3.20915	FALSE	FALSE	FALSE	FALSE	FALSE	FALSE	TRUE	FALSE	FALSE	FALSE	FALSE	FALSE	FALSE	FALSE
17	IGF2BP1	NP_006537.3	0.172538	0.129669	-5.9585	-4.16256	-1.0445	0.825064	-5.3847	-4.095	-3.17115	FALSE	FALSE	FALSE	FALSE	FALSE	FALSE	TRUE	FALSE	FALSE	FALSE	FALSE	FALSE	FALSE	FALSE
6	DCDC2	NP_057440.2	0	0.00307134	-4.691	-3.58836	-2.5985	0.423186	-4.217	-3.507	-3.0791	FALSE	FALSE	FALSE	FALSE	FALSE	FALSE	FALSE	FALSE	FALSE	FALSE	TRUE	FALSE	FALSE	TRUE
14	LRFN5	NP_689660.2	0	0.00497377	-4.6805	-3.69785	-2.4575	0.442059	-4.3245	-3.6695	-3.1355	FALSE	FALSE	FALSE	FALSE	FALSE	FALSE	TRUE	FALSE	FALSE	FALSE	FALSE	FALSE	FALSE	FALSE
12	ACAD10	NP_001130010.1	0	0	-4.58	-3.49797	-2.647	0.288477	-3.957	-3.359	-3.3015	FALSE	FALSE	FALSE	FALSE	FALSE	FALSE	TRUE	FALSE	FALSE	FALSE	FALSE	FALSE	FALSE	FALSE
12	ACSM4	NP_001073923.1	0	0	-4.471	-3.6257	-2.357	0.34515	-4.09855	-3.6195	-3.1755	FALSE	FALSE	FALSE	FALSE	FALSE	FALSE	FALSE	FALSE	FALSE	FALSE	FALSE	FALSE	FALSE	FALSE
7	SP4	NP_003103.2	0.0266546	0.0716061	-5.417	-3.59454	-1.9965	0.66169	-4.604	-3.484	-2.824	FALSE	FALSE	FALSE	FALSE	FALSE	FALSE	TRUE	FALSE	FALSE	FALSE	FALSE	FALSE	FALSE	FALSE
3	ALDH1L1	NP_001257293.1	0	0.0010057	-4.7185	-3.54785	-2.23	0.439377	-4.1255	-3.5525	-2.9644	FALSE	FALSE	FALSE	FALSE	FALSE	FALSE	FALSE	FALSE	FALSE	FALSE	FALSE	FALSE	FALSE	FALSE
14	CFL2	NP_068733.1	0.324038	0.112333	-7.1675	-4.52513	-3.0275	1.06478	-6.0795	-4.3885	-3.19325	FALSE	TRUE	FALSE	FALSE	FALSE	FALSE	TRUE	FALSE	FALSE	FALSE	TRUE	FALSE	FALSE	TRUE
4	CHIC2	NP_036242.1	0	0.0804004	-4.9575	-3.94687	-2.159	0.483573	-4.5775	-3.948	-3.3046	FALSE	FALSE	FALSE	FALSE	FALSE	FALSE	FALSE	FALSE	FALSE	FALSE	FALSE	FALSE	FALSE	FALSE
12	SP7	NP_001166938.1	0	0	-3.9385	-3.47939	-2.941	0.204735	-3.794	-3.43975	-3.24	FALSE	FALSE	FALSE	FALSE	FALSE	FALSE	TRUE	FALSE	FALSE	FALSE	FALSE	FALSE	FALSE	FALSE
6	ZNF76	NP_003418.2	0	0	-3.6865	-3.28598	-1.246	0.230362	-3.4905	-3.3425	-3.0125	FALSE	FALSE	FALSE	FALSE	FALSE	FALSE	TRUE	FALSE	FALSE	FALSE	FALSE	FALSE	FALSE	FALSE
12	VPS37B	NP_078943.1	0.00132685	0.00973021	-5.0825	-3.27038	-2.1915	0.431169	-3.84495	-3.20125	-2.808	FALSE	FALSE	FALSE	FALSE	FALSE	FALSE	FALSE	FALSE	FALSE	FALSE	FALSE	FALSE	FALSE	FALSE
17	KAT7	NP_001186086.1	0.388021	0.137473	-6.8765	-4.76224	-3.087	0.898935	-6.023	-4.7065	-3.61275	FALSE	FALSE	FALSE	FALSE	FALSE	FALSE	TRUE	FALSE	FALSE	FALSE	FALSE	FALSE	FALSE	FALSE
10	SLK	NP_055535.2	0.0195928	0.0662483	-5.391	-3.74569	-2.4185	0.558801	-4.5574	-3.6445	-3.0968	FALSE	FALSE	FALSE	FALSE	FALSE	FALSE	FALSE	FALSE	FALSE	FALSE	FALSE	FALSE	FALSE	FALSE
1	SCAMP3	NP_005689.2	0	0	-4.2715	-3.5456	-2.145	0.375393	-4.07145	-3.52675	-3.073	FALSE	FALSE	FALSE	FALSE	FALSE	FALSE	TRUE	FALSE	FALSE	FALSE	FALSE	FALSE	FALSE	FALSE
2	RPRM	NP_062819.1	0	0	-4.2005	-3.31444	-2.2975	0.350894	-3.82425	-3.28125	-2.894	FALSE	FALSE	FALSE	FALSE	FALSE	FALSE	FALSE	FALSE	FALSE	FALSE	FALSE	FALSE	FALSE	FALSE
9	AJM1	NP_001073951.2	0	0.00842543	-4.7875	-3.29503	-2.584	0.315763	-3.65765	-3.2475	-2.959	FALSE	FALSE	FALSE	FALSE	FALSE	FALSE	FALSE	TRUE	FALSE	FALSE	FALSE	FALSE	FALSE	FALSE
2	CDKL4	NP_001333840.1	0	0.00877193	-4.8965	-3.47779	-1.968	0.373742	-4.04845	-3.3855	-3.102	FALSE	FALSE	FALSE	FALSE	FALSE	FALSE	FALSE	FALSE	FALSE	FALSE	FALSE	FALSE	FALSE	FALSE
17	C17orf98	NP_001073934.1	0	0	-4.004	-3.3116	-2.754	0.168273	-3.513	-3.311	-3.0955	FALSE	FALSE	FALSE	FALSE	FALSE	FALSE	FALSE	FALSE	FALSE	FALSE	FALSE	FALSE	FALSE	FALSE
5	UBE2QL1	NP_001138633.1	0.300068	0.202666	-6.5505	-4.61692	-2.3965	0.774139	-5.6605	-4.621	-3.60325	FALSE	FALSE	FALSE	FALSE	FALSE	FALSE	FALSE	FALSE	FALSE	FALSE	FALSE	FALSE	FALSE	FALSE
14	COA8	NP_001357524.1	0	0.0310881	-4.994	-3.34718	-1.697	0.682081	-4.321	-3.262	-2.5276	FALSE	FALSE	FALSE	FALSE	FALSE	FALSE	FALSE	FALSE	FALSE	FALSE	TRUE	FALSE	FALSE	TRUE
4	TMA16	NP_060822.2	0.000907441	0.0405324	-5.134	-3.62951	-1.724	0.608008	-4.4075	-3.65325	-2.79775	FALSE	FALSE	FALSE	FALSE	FALSE	FALSE	FALSE	FALSE	FALSE	FALSE	FALSE	FALSE	FALSE	FALSE
6	KHDRBS2	NP_689901.2	0	0.0316963	-4.8605	-3.54867	-1.6155	0.663484	-4.4365	-3.561	-2.648	FALSE	FALSE	FALSE	FALSE	FALSE	FALSE	TRUE	FALSE	FALSE	FALSE	FALSE	FALSE	FALSE	FALSE
9	MEGF9	NP_001073966.2	0	0.00270536	-4.7295	-3.701	-1.819	0.499654	-4.36495	-3.70025	-3.04655	FALSE	FALSE	FALSE	FALSE	FALSE	FALSE	FALSE	FALSE	FALSE	FALSE	FALSE	FALSE	FALSE	FALSE
19	MAP1S	NP_060644.4	0	0.0144516	-4.9155	-3.10665	-1.572	0.451984	-3.70625	-3.0525	-2.594	FALSE	FALSE	FALSE	FALSE	FALSE	FALSE	FALSE	FALSE	FALSE	FALSE	FALSE	FALSE	FALSE	FALSE
21	ERVH48-1	NP_001295420.1	0.345625	0.653704	-5.336	-5.02391	-4.4365	0.112494	-5.1689	-5.012	-4.9001	FALSE	FALSE	FALSE	FALSE	FALSE	FALSE	FALSE	FALSE	FALSE	FALSE	FALSE	FALSE	FALSE	FALSE
6	ADGRF2	NP_722581.4	0	0	-4.3865	-3.39211	-1.7005	0.418691	-3.9625	-3.37075	-2.86745	FALSE	FALSE	FALSE	FALSE	FALSE	FALSE	TRUE	FALSE	FALSE	FALSE	FALSE	FALSE	FALSE	FALSE
11	C11orf94	NP_001073915.2	0	0	-4.0265	-3.1553	-2.3295	0.228853	-3.46435	-3.12025	-2.91395	FALSE	FALSE	FALSE	FALSE	FALSE	FALSE	FALSE	FALSE	FALSE	FALSE	FALSE	FALSE	FALSE	FALSE
3	ACTRT3	NP_115876.3	0	0.00743707	-4.9025	-3.40955	-2.0325	0.501547	-4.10145	-3.36875	-2.78605	FALSE	FALSE	FALSE	FALSE	FALSE	FALSE	TRUE	FALSE	FALSE	FALSE	FALSE	FALSE	FALSE	FALSE
4	USO1	NP_001276978.1	0.126178	0.112318	-5.8335	-4.02562	-0.9715	0.740986	-5.175	-3.847	-3.218	FALSE	FALSE	FALSE	FALSE	FALSE	FALSE	FALSE	TRUE	FALSE	FALSE	FALSE	FALSE	FALSE	FALSE
7	NUB1	NP_001230280.2	0	0	-4.472	-3.61628	-2.643	0.342437	-4.1305	-3.579	-3.2025	FALSE	FALSE	FALSE	FALSE	FALSE	FALSE	FALSE	FALSE	FALSE	FALSE	FALSE	FALSE	FALSE	FALSE
1	TEX35	NP_001164193.1	0	0	-4.024	-3.50191	-2.7285	0.208354	-3.8027	-3.4845	-3.2499	FALSE	FALSE	FALSE	FALSE	FALSE	FALSE	FALSE	FALSE	FALSE	FALSE	FALSE	FALSE	FALSE	FALSE
12	OR6C68	NP_001005519.2	0.0954271	0.069025	-6.162	-3.52448	-1.141	0.949925	-5.0281	-3.271	-2.5247	FALSE	FALSE	FALSE	FALSE	FALSE	FALSE	FALSE	FALSE	FALSE	FALSE	FALSE	FALSE	FALSE	FALSE
10	MARVELD1	NP_113672.1	0	0	-3.959	-3.3348	-1.9135	0.302806	-3.735	-3.34	-2.9402	FALSE	FALSE	FALSE	FALSE	FALSE	FALSE	TRUE	FALSE	FALSE	FALSE	FALSE	FALSE	FALSE	FALSE
X	ATG4A	NP_443168.2	0.0463403	0.164339	-5.6385	-4.23463	-3.0045	0.436967	-4.8656	-4.155	-3.7305	FALSE	FALSE	FALSE	FALSE	FALSE	FALSE	FALSE	FALSE	FALSE	FALSE	FALSE	FALSE	FALSE	FALSE
12	OAS2	NP_058197.2	0	0	-4.2245	-3.52756	-2.3195	0.304067	-3.9405	-3.5255	-3.1446	FALSE	FALSE	FALSE	FALSE	FALSE	FALSE	FALSE	FALSE	FALSE	FALSE	FALSE	FALSE	FALSE	FALSE
1	TAF1A	NP_001188465.1	0	0.0098986	-4.718	-3.77433	-2.6395	0.384829	-4.3525	-3.721	-3.3185	FALSE	FALSE	FALSE	FALSE	FALSE	FALSE	FALSE	FALSE	FALSE	FALSE	FALSE	FALSE	FALSE	FALSE
2	UGT1A4	NP_009051.1	0	0	-4.282	-3.24462	-1.7395	0.415883	-3.7865	-3.2575	-2.6785	FALSE	FALSE	FALSE	FALSE	FALSE	FALSE	FALSE	FALSE	FALSE	FALSE	FALSE	FALSE	FALSE	FALSE
21	KRTAP10-7	NP_941962.1	0.194694	0.0892169	-7.1045	-3.94884	-0.1095	1.17046	-5.68265	-3.77	-2.6013	FALSE	FALSE	FALSE	FALSE	FALSE	FALSE	FALSE	FALSE	FALSE	FALSE	FALSE	FALSE	FALSE	FALSE
1	CYP4A22	NP_001010969.2	0.0233438	0.0691668	-6.071	-3.6132	-0.828	0.715921	-4.5819	-3.5755	-2.726	FALSE	FALSE	FALSE	FALSE	FALSE	FALSE	FALSE	FALSE	FALSE	FALSE	FALSE	FALSE	FALSE	FALSE
7	TAS2R41	NP_795364.2	0	0	-4.522	-3.57223	-1.99	0.432079	-4.16195	-3.56325	-3.022	FALSE	FALSE	FALSE	FALSE	FALSE	FALSE	FALSE	FALSE	FALSE	FALSE	FALSE	FALSE	FALSE	FALSE
3	DYNLT2B	NP_689986.2	0	0.0936664	-4.8915	-3.90466	-2.794	0.491457	-4.6034	-3.88325	-3.2391	FALSE	FALSE	FALSE	FALSE	FALSE	FALSE	FALSE	FALSE	FALSE	FALSE	FALSE	FALSE	FALSE	FALSE
14	BCL2L2	NP_004041.2	0.0291022	0.0823529	-5.6505	-3.72066	-1.8215	0.645522	-4.66375	-3.6585	-2.9329	FALSE	FALSE	FALSE	FALSE	FALSE	FALSE	FALSE	FALSE	FALSE	FALSE	FALSE	FALSE	FALSE	FALSE
3	IL1RAP	NP_001161403.1	0	0.0204902	-5.03	-3.64093	-2.714	0.438745	-4.27025	-3.5905	-3.1065	FALSE	FALSE	FALSE	FALSE	FALSE	FALSE	TRUE	FALSE	FALSE	FALSE	FALSE	FALSE	FALSE	FALSE
19	QPCTL	NP_060129.2	0	0.000337382	-4.7045	-3.44573	-2.387	0.375505	-3.973	-3.39475	-2.99085	FALSE	FALSE	FALSE	FALSE	FALSE	FALSE	TRUE	FALSE	FALSE	FALSE	FALSE	FALSE	FALSE	FALSE
11	SLCO2B1	NP_009187.1	0.00843088	0.0484571	-5.5115	-3.5645	-2.0265	0.567243	-4.3992	-3.4435	-2.9368	FALSE	FALSE	FALSE	FALSE	FALSE	FALSE	FALSE	FALSE	FALSE	FALSE	FALSE	FALSE	FALSE	FALSE
20	APMAP	NP_065392.1	0	0.0075188	-4.787	-3.56584	-2.0035	0.486578	-4.2429	-3.543	-2.952	FALSE	FALSE	FALSE	FALSE	FALSE	FALSE	TRUE	FALSE	FALSE	FALSE	FALSE	FALSE	FALSE	FALSE
4	METTL14	NP_066012.1	0.00749601	0.300319	-5.1275	-4.32799	-2.891	0.429441	-4.8525	-4.37975	-3.7134	FALSE	FALSE	FALSE	FALSE	FALSE	FALSE	FALSE	FALSE	FALSE	FALSE	FALSE	FALSE	FALSE	FALSE
4	SPP1	NP_001035147.1	0	0	-4.311	-3.49907	-2.2715	0.274119	-3.84375	-3.5105	-3.13825	FALSE	FALSE	FALSE	FALSE	FALSE	FALSE	TRUE	FALSE	FALSE	FALSE	FALSE	FALSE	FALSE	FALSE
8	PYCR3	NP_075566.3	0.00556107	0.0345581	-5.3655	-3.30763	-2.2535	0.626274	-4.2698	-3.117	-2.675	FALSE	FALSE	FALSE	FALSE	FALSE	FALSE	FALSE	FALSE	FALSE	FALSE	FALSE	FALSE	FALSE	FALSE
X	MAGEB6	NP_775794.2	0.195421	0.0710408	-6.77	-3.96833	-0.5465	1.07985	-5.7245	-3.5935	-2.96	FALSE	FALSE	FALSE	FALSE	FALSE	FALSE	FALSE	FALSE	FALSE	FALSE	FALSE	FALSE	FALSE	FALSE
1	GNAT2	NP_005263.1	0	0.0118993	-4.9205	-3.65156	-2.4695	0.459435	-4.292	-3.609	-3.0742	FALSE	TRUE	FALSE	FALSE	FALSE	FALSE	TRUE	FALSE	FALSE	FALSE	FALSE	FALSE	FALSE	FALSE
8	MICU3	NP_859074.1	0	0.002859	-4.719	-3.35654	-2.2715	0.410091	-3.9743	-3.2565	-2.9325	FALSE	FALSE	FALSE	FALSE	FALSE	FALSE	FALSE	FALSE	FALSE	FALSE	FALSE	FALSE	FALSE	FALSE
5	SQSTM1	NP_003891.1	0	0	-4.2835	-3.11542	-2.689	0.313667	-3.6107	-2.987	-2.8555	TRUE	FALSE	FALSE	FALSE	FALSE	FALSE	FALSE	FALSE	FALSE	FALSE	FALSE	FALSE	FALSE	FALSE
22	MIOX	NP_060054.4	0	0	-4.206	-3.25294	-2.803	0.314152	-3.71745	-3.186	-2.9055	FALSE	FALSE	FALSE	FALSE	FALSE	FALSE	FALSE	FALSE	FALSE	FALSE	FALSE	FALSE	FALSE	FALSE
2	TXNDC9	NP_005774.2	0.00117832	0.113904	-5.0925	-3.93674	-2.1195	0.561322	-4.65725	-3.9755	-3.17375	FALSE	FALSE	FALSE	FALSE	FALSE	FALSE	FALSE	FALSE	FALSE	FALSE	FALSE	FALSE	FALSE	FALSE
12	ATP5MC2	NP_001002031.1	0.0209084	0.389329	-5.2765	-4.3956	-2.6545	0.471615	-4.8957	-4.526	-3.6744	FALSE	FALSE	FALSE	FALSE	FALSE	FALSE	TRUE	FALSE	FALSE	FALSE	FALSE	FALSE	FALSE	FALSE
11	TPH1	NP_004170.1	0	0.00460526	-4.7295	-3.75041	-2.638	0.399808	-4.2735	-3.75475	-3.21345	FALSE	FALSE	FALSE	FALSE	FALSE	FALSE	FALSE	FALSE	FALSE	FALSE	FALSE	FALSE	FALSE	FALSE
15	DISP2	NP_277045.1	0	0	-4.4555	-3.38343	-2.375	0.353296	-3.9031	-3.3315	-2.9755	FALSE	FALSE	FALSE	FALSE	FALSE	FALSE	FALSE	FALSE	FALSE	FALSE	FALSE	FALSE	FALSE	FALSE
6	PGM3	NP_001186846.1	0	0.020794	-4.8925	-3.73327	-2.598	0.453929	-4.3675	-3.706	-3.1555	FALSE	FALSE	FALSE	FALSE	FALSE	FALSE	FALSE	FALSE	FALSE	FALSE	TRUE	FALSE	FALSE	TRUE
20	LPIN3	NP_001288789.1	0	0.0458744	-4.88	-3.49623	-2.242	0.463399	-4.304	-3.2935	-3.127	FALSE	FALSE	FALSE	FALSE	FALSE	FALSE	TRUE	FALSE	FALSE	FALSE	FALSE	FALSE	FALSE	FALSE
3	TOMM70	NP_055635.3	0	0.0888995	-5.034	-3.80337	-2.1395	0.573592	-4.58555	-3.7985	-3.037	FALSE	FALSE	FALSE	FALSE	FALSE	FALSE	FALSE	FALSE	FALSE	FALSE	FALSE	FALSE	FALSE	FALSE
12	BCDIN3D	NP_859059.1	0	0	-4.1725	-3.54664	-2.615	0.293805	-3.945	-3.55575	-3.1495	FALSE	FALSE	FALSE	FALSE	FALSE	FALSE	TRUE	FALSE	FALSE	FALSE	FALSE	FALSE	FALSE	FALSE
5	HDAC3	NP_003874.2	0.0147767	0.219492	-5.3015	-4.27913	-3.0335	0.419228	-4.8319	-4.2945	-3.7066	FALSE	FALSE	FALSE	FALSE	FALSE	FALSE	FALSE	FALSE	FALSE	FALSE	FALSE	FALSE	FALSE	FALSE
10	EIF3A	NP_003741.1	0.00335835	0.0399853	-5.504	-3.69687	-3.0865	0.456282	-4.3807	-3.595	-3.1805	FALSE	FALSE	FALSE	FALSE	FALSE	FALSE	FALSE	FALSE	FALSE	FALSE	FALSE	FALSE	FALSE	FALSE
3	RUBCN	NP_001139114.1	0	0.0590941	-4.871	-3.49304	-1.742	0.522162	-4.41175	-3.258	-3.0535	FALSE	FALSE	FALSE	FALSE	FALSE	FALSE	FALSE	FALSE	FALSE	FALSE	TRUE	FALSE	FALSE	TRUE
X	FOXR2	NP_940853.1	0	0	-4.311	-3.79476	-2.6705	0.258362	-4.1571	-3.7715	-3.469	FALSE	FALSE	FALSE	FALSE	FALSE	FALSE	TRUE	FALSE	FALSE	FALSE	FALSE	FALSE	FALSE	FALSE
1	LCE1C	NP_848128.1	0	0	-3.768	-3.29704	-1.826	0.262846	-3.5775	-3.3545	-2.9442	FALSE	FALSE	FALSE	FALSE	FALSE	FALSE	FALSE	FALSE	FALSE	FALSE	FALSE	FALSE	FALSE	FALSE
4	HELT	NP_001287710.1	0.000615574	0.0326254	-5.131	-3.4109	-2.2455	0.566661	-4.2962	-3.264	-2.803	FALSE	FALSE	FALSE	FALSE	FALSE	FALSE	FALSE	FALSE	FALSE	FALSE	FALSE	FALSE	FALSE	FALSE
6	DXO	NP_005501.2	0	0	-4.5225	-3.44639	-2.3305	0.366828	-3.9722	-3.3955	-3.0103	FALSE	FALSE	FALSE	FALSE	FALSE	FALSE	TRUE	FALSE	FALSE	FALSE	FALSE	FALSE	FALSE	FALSE
11	NAP1L4	NP_005960.1	0.141809	0.105263	-6.0735	-3.92998	-2.023	0.886699	-5.2557	-3.777	-2.8887	FALSE	FALSE	FALSE	FALSE	FALSE	FALSE	TRUE	FALSE	FALSE	FALSE	FALSE	FALSE	FALSE	FALSE
1	PADI4	NP_036519.2	0	0	-4.402	-3.38673	-2.0395	0.360406	-3.8455	-3.398	-2.904	FALSE	FALSE	FALSE	FALSE	FALSE	FALSE	TRUE	FALSE	FALSE	FALSE	FALSE	FALSE	FALSE	FALSE
2	LIMS2	NP_060450.2	0	0	-4.4595	-3.33337	-2.76	0.343343	-3.8735	-3.233	-2.97215	FALSE	FALSE	FALSE	FALSE	FALSE	FALSE	FALSE	FALSE	FALSE	FALSE	FALSE	FALSE	FALSE	FALSE
X	MAGEB10	NP_872312.2	0.31068	0.0868677	-7.9595	-4.55649	-2.7615	1.2321	-6.4715	-4.2	-3.211	FALSE	FALSE	FALSE	FALSE	FALSE	FALSE	FALSE	FALSE	FALSE	FALSE	FALSE	FALSE	FALSE	FALSE
6	C6orf52	NP_001138492.1	0	0	-3.741	-3.29684	-2.287	0.235609	-3.5685	-3.331	-2.9833	FALSE	FALSE	FALSE	FALSE	FALSE	FALSE	FALSE	FALSE	FALSE	FALSE	FALSE	FALSE	FALSE	FALSE
6	ZBTB9	NP_689948.1	0.000234439	0.0414957	-5.086	-3.54737	-2.479	0.476003	-4.2955	-3.4215	-3.06	FALSE	FALSE	FALSE	FALSE	FALSE	FALSE	FALSE	FALSE	FALSE	FALSE	FALSE	FALSE	FALSE	FALSE
7	FAM185A	NP_001138740.2	0	0.00475679	-4.7525	-3.67035	-1.764	0.465728	-4.2915	-3.6785	-3.0575	FALSE	FALSE	FALSE	FALSE	FALSE	FALSE	FALSE	FALSE	FALSE	FALSE	FALSE	FALSE	FALSE	FALSE
1	PPIAL4A	NP_001137355.1	0.0965517	0.0588022	-6.6955	-3.40682	0.1335	1.05135	-5.0275	-3.1545	-2.2557	FALSE	FALSE	FALSE	FALSE	FALSE	FALSE	FALSE	TRUE	FALSE	FALSE	FALSE	FALSE	FALSE	FALSE
3	LXN	NP_064554.3	0	0	-4.414	-3.50979	-2.32	0.313028	-3.9072	-3.513	-3.1099	FALSE	FALSE	FALSE	FALSE	FALSE	FALSE	FALSE	FALSE	FALSE	FALSE	FALSE	FALSE	FALSE	FALSE
1	PRDX1	NP_002565.1	0.000287604	0.0207075	-5.1815	-3.65787	-1.5525	0.579762	-4.365	-3.73	-2.8479	FALSE	FALSE	FALSE	FALSE	FALSE	FALSE	TRUE	FALSE	FALSE	FALSE	FALSE	FALSE	FALSE	FALSE
15	CALML4	NP_219501.3	0	0	-4.206	-3.41389	-2.2705	0.376348	-3.916	-3.42025	-2.9115	FALSE	FALSE	FALSE	FALSE	FALSE	FALSE	FALSE	FALSE	FALSE	FALSE	FALSE	FALSE	FALSE	FALSE
2	IWS1	NP_060439.2	0.0778706	0.112843	-6.041	-3.8814	-2.2935	0.738674	-4.9536	-3.779	-2.9955	FALSE	FALSE	FALSE	FALSE	FALSE	FALSE	FALSE	FALSE	FALSE	FALSE	FALSE	FALSE	FALSE	FALSE
16	ITGAD	NP_001305114.1	0	0	-3.979	-3.40357	-2.415	0.324194	-3.7905	-3.461	-2.9253	FALSE	FALSE	FALSE	FALSE	FALSE	FALSE	TRUE	FALSE	FALSE	FALSE	FALSE	FALSE	FALSE	FALSE
7	UBE3C	NP_055486.2	0.0166416	0.0665163	-5.5315	-3.73942	-2.2415	0.507652	-4.53455	-3.628	-3.201	FALSE	FALSE	FALSE	FALSE	FALSE	FALSE	TRUE	FALSE	FALSE	FALSE	FALSE	FALSE	FALSE	FALSE
11	TOLLIP	NP_061882.2	0	0.00628437	-4.7585	-3.4755	-2.0355	0.532706	-4.20595	-3.472	-2.77525	FALSE	FALSE	FALSE	FALSE	FALSE	FALSE	TRUE	FALSE	FALSE	FALSE	FALSE	FALSE	FALSE	FALSE
12	AAAS	NP_056480.1	0.0093639	0.0538155	-5.226	-3.62312	-2.3875	0.521652	-4.401	-3.489	-3.0645	FALSE	TRUE	FALSE	FALSE	FALSE	FALSE	FALSE	FALSE	FALSE	FALSE	TRUE	FALSE	FALSE	TRUE
5	TGFBI	NP_000349.1	0	0.00506392	-4.825	-3.49597	-2.6015	0.430381	-4.11925	-3.431	-2.978	TRUE	FALSE	FALSE	FALSE	FALSE	FALSE	TRUE	FALSE	FALSE	FALSE	FALSE	FALSE	FALSE	FALSE
20	SPTLC3	NP_060797.2	0	0.0778451	-4.859	-3.77629	-1.673	0.551133	-4.568	-3.73975	-3.0625	FALSE	FALSE	FALSE	FALSE	FALSE	FALSE	TRUE	FALSE	FALSE	FALSE	FALSE	FALSE	FALSE	FALSE
2	MAT2A	NP_005902.1	0.558401	0.0933014	-7.7995	-5.17067	-2.316	1.3131	-6.8535	-5.30525	-3.27825	FALSE	FALSE	FALSE	FALSE	FALSE	FALSE	FALSE	FALSE	FALSE	FALSE	FALSE	FALSE	FALSE	FALSE
6	SLC25A27	NP_004268.3	0	0.00701754	-4.769	-3.74796	-1.978	0.507515	-4.3785	-3.806	-3.0275	FALSE	FALSE	FALSE	FALSE	FALSE	FALSE	FALSE	FALSE	FALSE	FALSE	FALSE	FALSE	FALSE	FALSE
12	KRT18	NP_000215.1	0.0697577	0.0850738	-6.2525	-3.84224	-1.9095	0.743064	-4.8654	-3.7885	-2.92405	FALSE	TRUE	FALSE	FALSE	FALSE	FALSE	TRUE	FALSE	FALSE	FALSE	FALSE	FALSE	FALSE	FALSE
19	TGFBR3L	NP_001182188.1	0.00463803	0.026215	-5.469	-3.37358	-2.219	0.537281	-4.1526	-3.2715	-2.7798	FALSE	FALSE	FALSE	FALSE	FALSE	FALSE	FALSE	FALSE	FALSE	FALSE	FALSE	FALSE	FALSE	FALSE
8	PSKH2	NP_149117.1	0	0	-4.3785	-3.37664	-2.014	0.402929	-3.95155	-3.3395	-2.8755	FALSE	FALSE	FALSE	FALSE	FALSE	FALSE	FALSE	FALSE	FALSE	FALSE	FALSE	FALSE	FALSE	FALSE
12	DUSP16	NP_085143.1	0	0.00402382	-4.7385	-3.60559	-2.3845	0.440298	-4.234	-3.527	-3.071	FALSE	FALSE	FALSE	FALSE	FALSE	FALSE	TRUE	FALSE	FALSE	FALSE	FALSE	FALSE	FALSE	FALSE
8	KCNQ3	NP_004510.1	0.061238	0.145151	-5.6415	-3.94238	-2.4745	0.692355	-4.91785	-3.89175	-3.0705	TRUE	FALSE	FALSE	FALSE	FALSE	FALSE	FALSE	FALSE	FALSE	FALSE	TRUE	TRUE	TRUE	TRUE
15	CGNL1	NP_001239264.1	0	0	-3.818	-3.2508	-1.769	0.290543	-3.6875	-3.2145	-2.9105	FALSE	FALSE	FALSE	FALSE	FALSE	FALSE	TRUE	FALSE	FALSE	FALSE	FALSE	FALSE	FALSE	FALSE
10	CCAR1	NP_060707.2	0	0.0118498	-4.9495	-3.79135	-2.645	0.308842	-4.174	-3.7835	-3.408	FALSE	FALSE	FALSE	FALSE	FALSE	FALSE	FALSE	FALSE	FALSE	FALSE	FALSE	FALSE	FALSE	FALSE
4	RGS12	NP_937872.1	0	0	-4.332	-3.33735	-1.7145	0.343385	-3.8235	-3.302	-2.938	FALSE	FALSE	FALSE	FALSE	FALSE	FALSE	TRUE	FALSE	FALSE	FALSE	FALSE	FALSE	FALSE	FALSE
7	ZNF3	NP_001305065.1	0.0354219	0.0763576	-5.506	-3.72264	-2.3905	0.620346	-4.6678	-3.565	-3.0545	FALSE	FALSE	FALSE	FALSE	FALSE	FALSE	FALSE	FALSE	FALSE	FALSE	FALSE	FALSE	FALSE	FALSE
10	APBB1IP	NP_061916.3	0.00312751	0.0528997	-5.352	-3.59166	-2.1425	0.606988	-4.46	-3.5105	-2.872	FALSE	FALSE	FALSE	FALSE	FALSE	FALSE	TRUE	FALSE	FALSE	FALSE	FALSE	FALSE	FALSE	FALSE
20	SLC23A2	NP_005107.4	0.0719265	0.165168	-5.6565	-4.04357	-3.1025	0.660551	-4.9685	-4.0105	-3.1785	FALSE	FALSE	FALSE	FALSE	FALSE	FALSE	FALSE	FALSE	FALSE	FALSE	FALSE	FALSE	FALSE	FALSE
17	GNGT2	NP_001185685.1	0	0	-3.9175	-3.63822	-3.279	0.123035	-3.804	-3.6375	-3.48	FALSE	FALSE	FALSE	FALSE	FALSE	FALSE	FALSE	FALSE	FALSE	FALSE	FALSE	FALSE	FALSE	FALSE
16	ALG1	NP_061982.3	0	0	-3.8685	-3.1358	-1.4575	0.400979	-3.6135	-3.19325	-2.567	FALSE	FALSE	FALSE	FALSE	FALSE	FALSE	FALSE	FALSE	FALSE	FALSE	TRUE	FALSE	FALSE	TRUE
18	NETO1	NP_001188394.2	0.0700464	0.113777	-5.823	-3.97698	-2.65	0.649507	-4.9213	-3.89025	-3.1625	FALSE	FALSE	FALSE	FALSE	FALSE	FALSE	FALSE	FALSE	FALSE	FALSE	FALSE	FALSE	FALSE	FALSE
6	CD164	NP_006007.2	0	0	-4.444	-3.48506	-2.323	0.400478	-4.0777	-3.4315	-2.9938	FALSE	FALSE	FALSE	FALSE	FALSE	FALSE	TRUE	FALSE	FALSE	FALSE	FALSE	FALSE	FALSE	FALSE
6	DYNLT1	NP_006510.1	0.0755361	0.131092	-5.7735	-3.76103	-2.079	0.870877	-4.95295	-3.71925	-2.607	FALSE	FALSE	FALSE	FALSE	FALSE	FALSE	FALSE	FALSE	FALSE	FALSE	FALSE	FALSE	FALSE	FALSE
15	NUSAP1	NP_001230072.1	0	0	-3.943	-3.48745	-1.6405	0.271858	-3.81	-3.524	-3.1335	FALSE	FALSE	FALSE	FALSE	FALSE	FALSE	FALSE	FALSE	FALSE	FALSE	FALSE	FALSE	FALSE	FALSE
2	SCLY	NP_057594.5	0	0.0327207	-4.8915	-3.36953	-1.106	0.578445	-4.287	-3.1685	-2.7985	FALSE	FALSE	FALSE	FALSE	FALSE	FALSE	FALSE	FALSE	FALSE	FALSE	FALSE	FALSE	FALSE	FALSE
7	URGCP-MRPS24	NP_001191800.1	0	0	-4.0885	-3.83489	-3.1655	0.15382	-3.9965	-3.873	-3.59415	FALSE	FALSE	FALSE	FALSE	FALSE	FALSE	FALSE	FALSE	FALSE	FALSE	FALSE	FALSE	FALSE	FALSE
11	EEF1G	NP_001395.1	0.0315789	0.143056	-5.857	-4.02713	-2.2905	0.598732	-4.7913	-4.0525	-3.2107	FALSE	FALSE	FALSE	FALSE	FALSE	FALSE	TRUE	FALSE	FALSE	FALSE	FALSE	FALSE	FALSE	FALSE
2	DPP4	NP_001926.2	0	0.0117293	-4.919	-3.5918	-2.4375	0.419998	-4.19255	-3.5305	-3.0905	FALSE	FALSE	FALSE	FALSE	FALSE	FALSE	TRUE	FALSE	FALSE	FALSE	FALSE	FALSE	FALSE	FALSE
18	ACAA2	NP_006102.2	0	0	-4.4255	-3.45396	-2.3525	0.374935	-3.95	-3.459	-2.9478	FALSE	FALSE	FALSE	FALSE	FALSE	FALSE	FALSE	FALSE	FALSE	FALSE	FALSE	FALSE	FALSE	FALSE
18	CCDC68	NP_001137301.1	0	0	-4.4415	-3.55336	-1.6675	0.35001	-4.024	-3.541	-3.1352	FALSE	FALSE	FALSE	FALSE	FALSE	FALSE	FALSE	FALSE	FALSE	FALSE	FALSE	FALSE	FALSE	FALSE
5	MTX3	NP_001161213.1	0.000274123	0.0254934	-5.0775	-3.61313	-2.392	0.507497	-4.311	-3.587	-2.9655	FALSE	FALSE	FALSE	FALSE	FALSE	FALSE	FALSE	FALSE	FALSE	FALSE	FALSE	FALSE	FALSE	FALSE
19	KDELR1	NP_006792.1	0.00623597	0.175106	-5.127	-4.02534	-2.396	0.584559	-4.7661	-4.073	-3.188	FALSE	FALSE	FALSE	FALSE	FALSE	FALSE	FALSE	FALSE	FALSE	FALSE	FALSE	FALSE	FALSE	FALSE
18	PARD6G	NP_115899.1	0	0	-4.604	-3.42869	-2.158	0.505819	-4.1136	-3.4255	-2.7813	FALSE	FALSE	FALSE	FALSE	FALSE	FALSE	FALSE	FALSE	FALSE	FALSE	FALSE	FALSE	FALSE	FALSE
4	PLAC8	NP_001124187.1	0	0.00113186	-4.743	-3.57923	-1.947	0.498041	-4.1796	-3.6415	-2.8635	FALSE	FALSE	FALSE	FALSE	FALSE	FALSE	FALSE	FALSE	FALSE	FALSE	FALSE	FALSE	FALSE	FALSE
6	ZFP57	NP_001103279.2	0	0	-4.58	-3.59919	-2.3765	0.323151	-4.0635	-3.5665	-3.2105	FALSE	TRUE	FALSE	FALSE	FALSE	FALSE	TRUE	FALSE	FALSE	FALSE	TRUE	FALSE	FALSE	TRUE
3	GPR87	NP_076404.3	0	0	-4.385	-3.38763	-2.33	0.369856	-3.903	-3.35425	-2.929	FALSE	FALSE	FALSE	FALSE	FALSE	FALSE	FALSE	FALSE	FALSE	FALSE	FALSE	FALSE	FALSE	FALSE
11	SCGB1D1	NP_006543.1	0	0	-3.9215	-3.40626	-2.807	0.190738	-3.6474	-3.4065	-3.1642	FALSE	TRUE	FALSE	FALSE	FALSE	FALSE	TRUE	FALSE	FALSE	FALSE	FALSE	FALSE	FALSE	FALSE
3	ATP1B3	NP_001670.1	0.0323734	0.216286	-5.286	-4.04297	-1.8235	0.686854	-4.8875	-4.128	-3.0855	FALSE	FALSE	FALSE	FALSE	FALSE	FALSE	TRUE	FALSE	FALSE	FALSE	FALSE	FALSE	FALSE	FALSE
12	COQ10A	NP_653177.3	0.000370645	0.04596	-5.208	-3.67045	-2.6655	0.521489	-4.38465	-3.60175	-3.01975	FALSE	FALSE	FALSE	FALSE	FALSE	FALSE	FALSE	FALSE	FALSE	FALSE	FALSE	FALSE	FALSE	FALSE
17	ELP5	NP_056177.4	0	0	-3.942	-3.34773	-2.3505	0.263782	-3.70505	-3.347	-3.00895	FALSE	FALSE	FALSE	FALSE	FALSE	FALSE	FALSE	FALSE	FALSE	FALSE	FALSE	FALSE	FALSE	FALSE
11	PEX16	NP_004804.2	0	0.000320924	-4.6725	-3.49545	-2.566	0.396854	-4.07785	-3.4155	-3.028	FALSE	TRUE	FALSE	FALSE	FALSE	FALSE	FALSE	FALSE	FALSE	FALSE	TRUE	FALSE	FALSE	TRUE
3	LMOD3	NP_938012.2	0	0	-3.555	-3.22457	-2.01	0.23356	-3.476	-3.289	-2.883	FALSE	FALSE	FALSE	FALSE	FALSE	FALSE	FALSE	FALSE	FALSE	FALSE	TRUE	FALSE	FALSE	TRUE
9	NOL8	NP_060418.4	0	0	-4.1795	-3.42771	-1.6385	0.336428	-3.81	-3.489	-2.9236	FALSE	FALSE	FALSE	FALSE	FALSE	FALSE	FALSE	FALSE	FALSE	FALSE	FALSE	FALSE	FALSE	FALSE
3	MELTF	NP_005920.2	0	0	-4.356	-3.28091	-2.167	0.440933	-3.913	-3.241	-2.72815	FALSE	FALSE	FALSE	FALSE	FALSE	FALSE	FALSE	FALSE	FALSE	FALSE	FALSE	FALSE	FALSE	FALSE
19	ZNF480	NP_653285.2	0.0904894	0.0504771	-6.243	-3.65422	-1.737	0.795017	-4.9725	-3.346	-2.9708	FALSE	FALSE	FALSE	FALSE	FALSE	FALSE	FALSE	FALSE	FALSE	FALSE	FALSE	FALSE	FALSE	FALSE
15	CIAO2A	NP_001014812.1	0	0	-4.586	-3.43964	-2.4465	0.427701	-4.202	-3.226	-3.114	FALSE	FALSE	FALSE	FALSE	FALSE	FALSE	TRUE	FALSE	FALSE	FALSE	FALSE	FALSE	FALSE	FALSE
1	KCNC4	NP_004969.2	0.0429646	0.0873613	-5.8705	-3.75837	-2.283	0.663161	-4.7343	-3.6215	-2.999	FALSE	FALSE	FALSE	FALSE	FALSE	FALSE	TRUE	FALSE	FALSE	FALSE	FALSE	FALSE	FALSE	FALSE
11	NAALADL1	NP_005459.2	0	0	-4.255	-3.31304	-2.2335	0.351173	-3.79	-3.304	-2.856	FALSE	FALSE	FALSE	FALSE	FALSE	FALSE	FALSE	FALSE	FALSE	FALSE	FALSE	FALSE	FALSE	FALSE
15	CYP11A1	NP_000772.2	0.0189474	0.0722807	-5.701	-3.73851	-2.1295	0.58519	-4.57755	-3.6675	-3.039	FALSE	TRUE	FALSE	FALSE	FALSE	FALSE	FALSE	FALSE	FALSE	FALSE	FALSE	FALSE	FALSE	FALSE
17	RARA	NP_000955.1	0.0900317	0.195898	-5.665	-4.26514	-2.382	0.576517	-5.027	-4.2745	-3.499	FALSE	FALSE	FALSE	FALSE	FALSE	FALSE	FALSE	FALSE	FALSE	FALSE	FALSE	FALSE	FALSE	FALSE
7	KBTBD2	NP_056298.2	0.104566	0.104101	-5.9535	-4.06074	-2.123	0.672255	-5.0819	-3.946	-3.282	FALSE	FALSE	FALSE	FALSE	FALSE	FALSE	TRUE	FALSE	FALSE	FALSE	FALSE	FALSE	FALSE	FALSE
6	PEX6	NP_000278.3	0	0	-4.3265	-3.50456	-2.762	0.279763	-3.94	-3.443	-3.1925	FALSE	TRUE	FALSE	FALSE	FALSE	FALSE	FALSE	FALSE	FALSE	FALSE	TRUE	FALSE	FALSE	TRUE
15	LOC102723623	NP_001369375.2	0.992864	0.00688161	-7.673	-6.34621	-4.3145	0.630569	-7.1967	-6.299	-5.5234	FALSE	FALSE	FALSE	FALSE	FALSE	FALSE	FALSE	FALSE	TRUE	FALSE	FALSE	FALSE	FALSE	FALSE
12	ANO2	NP_001265525.1	0	0.0110631	-4.9615	-3.52411	-2.312	0.422727	-4.16675	-3.428	-3.058	FALSE	FALSE	FALSE	FALSE	FALSE	FALSE	TRUE	FALSE	FALSE	FALSE	FALSE	FALSE	FALSE	FALSE
10	TBATA	NP_689923.3	0	0	-4.441	-3.26251	-1.446	0.299599	-3.604	-3.2795	-2.8675	FALSE	FALSE	FALSE	FALSE	FALSE	FALSE	FALSE	FALSE	FALSE	FALSE	FALSE	FALSE	FALSE	FALSE
X	RBM10	NP_005667.2	0.23511	0.206979	-6.088	-4.46329	-2.53	0.683346	-5.37	-4.476	-3.573	FALSE	FALSE	FALSE	FALSE	FALSE	FALSE	FALSE	FALSE	FALSE	FALSE	TRUE	FALSE	FALSE	TRUE
7	HOXA7	NP_008827.2	0.00305603	0.014601	-5.2015	-3.23278	-1.939	0.482163	-3.7863	-3.22	-2.6971	FALSE	FALSE	FALSE	FALSE	FALSE	FALSE	FALSE	FALSE	FALSE	FALSE	FALSE	FALSE	FALSE	FALSE
17	KIF18B	NP_001252506.1	0.0218416	0.0554219	-5.8205	-3.58635	-2.361	0.563357	-4.4848	-3.394	-3.057	FALSE	FALSE	FALSE	FALSE	FALSE	FALSE	FALSE	FALSE	FALSE	FALSE	FALSE	FALSE	FALSE	FALSE
16	IFT140	NP_055529.2	0	0	-4.1645	-3.20982	-1.9065	0.301077	-3.5975	-3.206	-2.833	FALSE	FALSE	FALSE	FALSE	FALSE	FALSE	FALSE	FALSE	FALSE	FALSE	TRUE	FALSE	FALSE	TRUE
6	GPSM3	NP_001263430.1	0	0	-4.2155	-3.46693	-2.518	0.328364	-3.93335	-3.43075	-3.0523	FALSE	FALSE	FALSE	FALSE	FALSE	FALSE	TRUE	FALSE	FALSE	FALSE	FALSE	FALSE	FALSE	FALSE
1	S100A10	NP_002957.1	0.180637	0.107862	-8.601	-4.00341	-0.76	1.10416	-5.4866	-3.944	-2.6686	FALSE	FALSE	FALSE	FALSE	FALSE	FALSE	TRUE	FALSE	FALSE	FALSE	FALSE	FALSE	FALSE	FALSE
1	TM2D1	NP_114416.1	0.00514444	0.148002	-5.1265	-3.91864	-2.1555	0.620048	-4.7177	-3.945	-3.0473	FALSE	FALSE	FALSE	FALSE	FALSE	FALSE	FALSE	FALSE	FALSE	FALSE	FALSE	FALSE	FALSE	FALSE
11	CLPB	NP_110440.1	0.0200445	0.082757	-5.4135	-3.69891	-2.4435	0.60152	-4.63	-3.5325	-3.051	FALSE	FALSE	FALSE	FALSE	FALSE	FALSE	FALSE	FALSE	FALSE	FALSE	TRUE	FALSE	FALSE	TRUE
17	SPATA22	NP_001164167.1	0	0	-4.232	-3.58339	-2.1905	0.31026	-4.05085	-3.534	-3.21615	FALSE	FALSE	FALSE	FALSE	FALSE	FALSE	FALSE	FALSE	FALSE	FALSE	FALSE	FALSE	FALSE	FALSE
11	RSF1	NP_057662.3	0.00856879	0.00819945	-5.493	-3.58288	-2.304	0.440175	-4.1145	-3.565	-3.04	FALSE	FALSE	FALSE	FALSE	FALSE	FALSE	FALSE	FALSE	FALSE	FALSE	FALSE	FALSE	FALSE	FALSE
12	SMCO3	NP_001013720.2	0	0	-3.912	-3.42213	-2.49	0.221128	-3.7051	-3.431	-3.1385	FALSE	FALSE	FALSE	FALSE	FALSE	FALSE	FALSE	FALSE	FALSE	FALSE	FALSE	FALSE	FALSE	FALSE
19	FUT1	NP_000139.1	0	0	-3.9575	-3.27871	-2.498	0.254326	-3.61735	-3.2855	-2.9355	FALSE	TRUE	FALSE	FALSE	FALSE	FALSE	TRUE	FALSE	FALSE	FALSE	FALSE	FALSE	FALSE	FALSE
6	NRSN1	NP_542454.3	0	0.017453	-4.808	-3.60062	-1.3515	0.422485	-4.207	-3.5565	-3.1018	FALSE	FALSE	FALSE	FALSE	FALSE	FALSE	FALSE	FALSE	FALSE	FALSE	FALSE	FALSE	FALSE	FALSE
X	NDP	NP_000257.1	0.0513158	0.0907895	-5.349	-4.24984	-3.4115	0.342798	-4.72275	-4.18275	-3.8945	FALSE	FALSE	TRUE	FALSE	FALSE	FALSE	TRUE	FALSE	FALSE	FALSE	TRUE	FALSE	FALSE	TRUE
2	CD28	NP_006130.1	0.00164474	0.0353618	-5.191	-3.66387	-2.2275	0.483992	-4.37415	-3.58675	-3.1085	FALSE	FALSE	FALSE	FALSE	FALSE	FALSE	TRUE	FALSE	FALSE	FALSE	FALSE	FALSE	FALSE	FALSE
9	ZFP37	NP_001269444.1	0	0.0552701	-5.0235	-3.77434	-2.246	0.456821	-4.419	-3.71	-3.251	FALSE	FALSE	FALSE	FALSE	FALSE	FALSE	FALSE	FALSE	FALSE	FALSE	FALSE	FALSE	FALSE	FALSE
5	ROPN1L	NP_114122.2	0	0	-4.2235	-3.38809	-2.625	0.254552	-3.7319	-3.3745	-3.0655	FALSE	FALSE	FALSE	FALSE	FALSE	FALSE	FALSE	FALSE	FALSE	FALSE	FALSE	FALSE	FALSE	FALSE
6	ENPP5	NP_001277002.1	0	0	-4.4135	-3.6491	-2.3155	0.387641	-4.1557	-3.65825	-3.14065	FALSE	FALSE	FALSE	FALSE	FALSE	FALSE	TRUE	FALSE	FALSE	FALSE	FALSE	FALSE	FALSE	FALSE
8	ENTPD4	NP_004892.1	0	0.0212946	-4.728	-3.60446	-1.927	0.533181	-4.3691	-3.544	-2.9462	FALSE	FALSE	FALSE	FALSE	FALSE	FALSE	FALSE	FALSE	FALSE	FALSE	FALSE	FALSE	FALSE	FALSE
17	NXPH3	NP_009156.2	0	0.0259191	-5.0445	-3.63625	-1.602	0.529984	-4.32	-3.6435	-2.9765	FALSE	FALSE	FALSE	FALSE	FALSE	FALSE	FALSE	FALSE	FALSE	FALSE	FALSE	FALSE	FALSE	FALSE
11	SLC22A11	NP_060954.1	0.00448796	0.0461036	-5.2755	-3.50707	-1.5745	0.652894	-4.39085	-3.4825	-2.678	FALSE	FALSE	FALSE	FALSE	FALSE	FALSE	TRUE	FALSE	FALSE	FALSE	FALSE	FALSE	FALSE	FALSE
6	CTAGE9	NP_001139131.1	0	0	-4.492	-3.74961	-2.3785	0.284411	-4.131	-3.7465	-3.392	FALSE	FALSE	FALSE	FALSE	FALSE	FALSE	FALSE	FALSE	FALSE	FALSE	FALSE	FALSE	FALSE	FALSE
15	SCG5	NP_001138229.1	0	0	-4.178	-3.74685	-3.1865	0.165027	-4.007	-3.7075	-3.5752	FALSE	FALSE	FALSE	FALSE	FALSE	FALSE	TRUE	FALSE	FALSE	FALSE	FALSE	FALSE	FALSE	FALSE
12	GALNT6	NP_009141.2	0	0	-4.326	-3.48312	-2.75	0.285379	-3.9125	-3.4195	-3.1605	FALSE	FALSE	FALSE	FALSE	FALSE	FALSE	FALSE	FALSE	FALSE	FALSE	FALSE	FALSE	FALSE	FALSE
1	HS2ST1	NP_036394.1	0	0.100269	-4.941	-3.87393	-1.147	0.646009	-4.61725	-4.008	-2.8895	FALSE	FALSE	FALSE	FALSE	FALSE	FALSE	FALSE	FALSE	FALSE	FALSE	TRUE	FALSE	FALSE	TRUE
11	ETS1	NP_001137292.1	0.0400403	0.156762	-5.263	-3.91146	-2.5225	0.638206	-4.8899	-3.751	-3.1841	FALSE	FALSE	FALSE	FALSE	FALSE	FALSE	TRUE	FALSE	FALSE	FALSE	FALSE	FALSE	FALSE	FALSE
12	PLEKHG6	NP_001371533.1	0	0.000807233	-4.6715	-3.37114	-1.8925	0.395452	-3.92	-3.32475	-2.903	FALSE	FALSE	FALSE	FALSE	FALSE	FALSE	FALSE	FALSE	FALSE	FALSE	FALSE	FALSE	FALSE	FALSE
17	PDE6G	NP_002593.1	0	0	-4.5795	-3.46236	-2.603	0.429239	-4.0548	-3.4525	-2.8766	FALSE	TRUE	FALSE	FALSE	FALSE	FALSE	FALSE	FALSE	FALSE	FALSE	TRUE	FALSE	FALSE	TRUE
16	E2F4	NP_001941.2	0.198806	0.0959752	-6.4125	-4.13078	-1.959	0.946628	-5.64035	-3.84975	-3.17655	FALSE	FALSE	FALSE	FALSE	FALSE	FALSE	TRUE	FALSE	FALSE	FALSE	FALSE	FALSE	FALSE	FALSE
11	TMEM80	NP_001371337.1	0	0	-4.215	-3.53781	-2.5045	0.380591	-4.01475	-3.5895	-2.98325	FALSE	FALSE	FALSE	FALSE	FALSE	FALSE	FALSE	FALSE	FALSE	FALSE	FALSE	FALSE	FALSE	FALSE
11	HTATIP2	NP_001091990.1	0	0	-4.1115	-3.52904	-2.3175	0.304554	-3.90815	-3.56	-3.11075	FALSE	FALSE	FALSE	FALSE	FALSE	FALSE	TRUE	FALSE	FALSE	FALSE	FALSE	FALSE	FALSE	FALSE
19	CEACAM8	NP_001807.2	0.00811103	0.0722783	-5.2315	-3.70182	-1.7375	0.640375	-4.5505	-3.706	-2.87085	FALSE	FALSE	FALSE	FALSE	FALSE	FALSE	FALSE	FALSE	FALSE	FALSE	FALSE	FALSE	FALSE	FALSE
6	FLOT1	NP_005794.1	0.0097166	0.130769	-5.1885	-3.83456	-2.8915	0.613474	-4.723	-3.7865	-3.02095	FALSE	FALSE	FALSE	FALSE	FALSE	FALSE	FALSE	FALSE	FALSE	FALSE	FALSE	FALSE	FALSE	FALSE
12	LETMD1	NP_056231.3	0	0.000504456	-4.6395	-3.5387	-1.9635	0.438851	-4.141	-3.5205	-2.9733	FALSE	FALSE	FALSE	FALSE	FALSE	FALSE	FALSE	FALSE	FALSE	FALSE	FALSE	FALSE	FALSE	FALSE
20	DEFB121	NP_001011878.1	0	0	-3.715	-3.39038	-2.9015	0.154416	-3.64495	-3.371	-3.20305	FALSE	FALSE	FALSE	FALSE	FALSE	FALSE	FALSE	FALSE	FALSE	FALSE	FALSE	FALSE	FALSE	FALSE
3	SLC25A38	NP_060345.2	0	0	-4.167	-3.38717	-2.211	0.394291	-3.8985	-3.4	-2.8545	FALSE	TRUE	FALSE	FALSE	FALSE	FALSE	FALSE	FALSE	FALSE	FALSE	TRUE	FALSE	FALSE	TRUE
2	ELMOD3	NP_001128493.1	0.00292398	0.0366357	-5.157	-3.61342	-2.468	0.420003	-4.266	-3.484	-3.2155	FALSE	FALSE	FALSE	FALSE	FALSE	FALSE	FALSE	FALSE	FALSE	FALSE	FALSE	FALSE	FALSE	FALSE
16	PRSS27	NP_114154.1	0	0.0015224	-4.7225	-3.41589	-2.518	0.486924	-4.11515	-3.3445	-2.827	FALSE	FALSE	FALSE	FALSE	FALSE	FALSE	FALSE	FALSE	FALSE	FALSE	FALSE	FALSE	FALSE	FALSE
16	AARS1	NP_001596.2	0	0.0128104	-4.8905	-3.47677	-2.894	0.490192	-4.2321	-3.354	-2.9395	FALSE	FALSE	FALSE	FALSE	FALSE	FALSE	FALSE	FALSE	FALSE	FALSE	TRUE	FALSE	FALSE	TRUE
1	GNPAT	NP_055051.1	0	0	-4.586	-3.55202	-2.128	0.430834	-4.192	-3.499	-3.0355	FALSE	TRUE	FALSE	FALSE	FALSE	FALSE	FALSE	FALSE	FALSE	FALSE	TRUE	FALSE	FALSE	TRUE
1	DUSP10	NP_009138.1	0	0	-4.5235	-3.67395	-2.127	0.448259	-4.266	-3.69575	-3.0755	FALSE	FALSE	FALSE	FALSE	FALSE	FALSE	FALSE	FALSE	FALSE	FALSE	FALSE	FALSE	FALSE	FALSE
2	GCKR	NP_001477.2	0	0	-4.001	-3.43812	-2.022	0.310442	-3.875	-3.436	-3.0345	FALSE	FALSE	FALSE	FALSE	FALSE	FALSE	FALSE	FALSE	FALSE	FALSE	FALSE	FALSE	FALSE	FALSE
10	TDRD1	NP_942090.1	0.0202113	0.117523	-5.5015	-3.74685	-2.3105	0.630848	-4.75685	-3.627	-3.0085	FALSE	FALSE	FALSE	FALSE	FALSE	FALSE	FALSE	FALSE	FALSE	FALSE	FALSE	FALSE	FALSE	FALSE
12	MYL6	NP_524147.2	0.0297172	0.0812746	-5.693	-3.77201	-2.361	0.642913	-4.667	-3.7285	-2.9671	FALSE	FALSE	FALSE	FALSE	FALSE	FALSE	FALSE	FALSE	FALSE	FALSE	FALSE	FALSE	FALSE	FALSE
5	ADCY2	NP_065433.2	0.176652	0.104606	-6.0885	-4.13207	-2.3765	0.81434	-5.3945	-3.982	-3.1675	FALSE	FALSE	FALSE	FALSE	FALSE	FALSE	TRUE	FALSE	FALSE	FALSE	FALSE	FALSE	FALSE	FALSE
1	OR10R2	NP_001004472.1	0.0466116	0.0584795	-5.953	-3.54142	-2.3215	0.706245	-4.65235	-3.34025	-2.82365	FALSE	FALSE	FALSE	FALSE	FALSE	FALSE	FALSE	FALSE	FALSE	FALSE	FALSE	FALSE	FALSE	FALSE
9	C9orf152	NP_001013011.2	0	0	-3.75	-3.41898	-2.5585	0.26244	-3.6855	-3.5005	-2.96605	FALSE	FALSE	FALSE	FALSE	FALSE	FALSE	FALSE	FALSE	FALSE	FALSE	FALSE	FALSE	FALSE	FALSE
20	VSX1	NP_055403.2	0	0	-3.8115	-3.20537	-2.1415	0.283882	-3.59105	-3.1915	-2.8444	TRUE	TRUE	FALSE	FALSE	FALSE	FALSE	FALSE	FALSE	FALSE	FALSE	FALSE	FALSE	FALSE	FALSE
8	CYP7A1	NP_000771.2	0	0	-4.445	-3.40895	-2.059	0.389043	-3.93445	-3.397	-2.9115	FALSE	FALSE	FALSE	FALSE	FALSE	FALSE	TRUE	FALSE	FALSE	FALSE	FALSE	FALSE	FALSE	FALSE
10	NDST2	NP_001317036.1	0.0946568	0.0915216	-6.282	-3.77254	-2.4435	0.840572	-5.023	-3.61	-2.804	FALSE	FALSE	FALSE	FALSE	FALSE	FALSE	FALSE	FALSE	FALSE	FALSE	FALSE	FALSE	FALSE	FALSE
X	CT45A10	NP_001372149.1	0	0.0151176	-4.836	-3.76174	-2.11	0.441965	-4.311	-3.7905	-3.17905	FALSE	FALSE	FALSE	FALSE	FALSE	FALSE	FALSE	TRUE	FALSE	FALSE	FALSE	FALSE	FALSE	FALSE
2	IL36B	NP_055253.2	0	0	-4.2285	-3.38302	-2.343	0.296598	-3.773	-3.3895	-2.9955	FALSE	FALSE	FALSE	FALSE	FALSE	FALSE	FALSE	FALSE	FALSE	FALSE	FALSE	FALSE	FALSE	FALSE
1	GPR88	NP_071332.2	0	0	-4.5655	-3.62427	-2.7435	0.445925	-4.3529	-3.51	-3.1286	FALSE	FALSE	FALSE	FALSE	FALSE	FALSE	FALSE	FALSE	FALSE	FALSE	FALSE	FALSE	FALSE	FALSE
7	HYAL4	NP_036401.2	0	0	-4.5615	-3.38602	-2.303	0.324063	-3.862	-3.319	-3.02655	FALSE	FALSE	FALSE	FALSE	FALSE	FALSE	TRUE	FALSE	FALSE	FALSE	FALSE	FALSE	FALSE	FALSE
10	FGFR2	NP_000132.3	0.208092	0.112986	-6.5795	-4.25859	-2.143	0.858053	-5.5442	-4.115	-3.2301	TRUE	TRUE	FALSE	FALSE	FALSE	FALSE	TRUE	FALSE	FALSE	FALSE	TRUE	TRUE	TRUE	TRUE
4	AFF1	NP_001160165.1	0	0.000215262	-4.644	-3.47843	-2.262	0.37571	-4.001	-3.4395	-3.044	FALSE	FALSE	FALSE	FALSE	FALSE	FALSE	TRUE	FALSE	FALSE	FALSE	FALSE	FALSE	FALSE	FALSE
9	IFNK	NP_064509.2	0	0	-4.5905	-3.44701	-2.1045	0.426251	-4.0215	-3.427	-2.9095	FALSE	FALSE	FALSE	TRUE	FALSE	FALSE	FALSE	FALSE	FALSE	FALSE	FALSE	FALSE	FALSE	FALSE
1	UBE2J2	NP_919296.1	0.187892	0.122716	-6.147	-4.17233	-3.228	0.799353	-5.4072	-4.004	-3.2755	FALSE	FALSE	FALSE	FALSE	FALSE	FALSE	FALSE	FALSE	FALSE	FALSE	FALSE	FALSE	FALSE	FALSE
19	U2AF2	NP_009210.1	0.504022	0.0922776	-7.8765	-5.20328	-2.8825	1.34297	-7.1805	-5.07625	-3.4975	FALSE	FALSE	FALSE	FALSE	FALSE	FALSE	FALSE	FALSE	FALSE	FALSE	TRUE	TRUE	TRUE	TRUE
6	AARS2	NP_065796.2	0.00128221	0.0272927	-5.459	-3.51815	-2.382	0.542058	-4.3	-3.44	-2.862	FALSE	FALSE	FALSE	FALSE	FALSE	FALSE	FALSE	FALSE	FALSE	FALSE	FALSE	FALSE	FALSE	FALSE
7	LSM5	NP_001124182.1	0	0	-4.616	-4.10404	-3.493	0.21538	-4.3843	-4.111	-3.8166	FALSE	FALSE	FALSE	FALSE	FALSE	FALSE	FALSE	FALSE	FALSE	FALSE	FALSE	FALSE	FALSE	FALSE
17	NAGS	NP_694551.1	0	0.000606355	-4.683	-3.57963	-2.6665	0.384387	-4.137	-3.525	-3.11675	FALSE	TRUE	FALSE	FALSE	FALSE	FALSE	FALSE	FALSE	FALSE	FALSE	TRUE	FALSE	FALSE	TRUE
12	LGR5	NP_003658.1	0	0.0173366	-4.97	-3.64633	-1.348	0.53597	-4.363	-3.644	-2.95385	FALSE	FALSE	FALSE	FALSE	FALSE	FALSE	FALSE	FALSE	FALSE	FALSE	FALSE	FALSE	FALSE	FALSE
9	CLIC3	NP_004660.2	0	0	-4.309	-3.21657	-2.1385	0.358848	-3.7573	-3.124	-2.8373	FALSE	FALSE	FALSE	FALSE	FALSE	FALSE	FALSE	FALSE	FALSE	FALSE	FALSE	FALSE	FALSE	FALSE
14	JAG2	NP_002217.3	0	0.05496	-4.899	-3.49104	-2.241	0.575371	-4.41545	-3.3855	-2.8245	FALSE	FALSE	FALSE	FALSE	FALSE	FALSE	FALSE	FALSE	FALSE	FALSE	TRUE	FALSE	FALSE	TRUE
10	SCD	NP_005054.3	0.00258541	0.1494	-5.14	-4.08049	-1.9935	0.517895	-4.7021	-4.151	-3.3602	FALSE	FALSE	FALSE	FALSE	FALSE	FALSE	FALSE	FALSE	FALSE	FALSE	FALSE	FALSE	FALSE	FALSE
19	PPM1N	NP_001073870.1	0	0	-4.246	-3.42791	-2.3275	0.313723	-3.8669	-3.407	-3.0352	FALSE	FALSE	FALSE	FALSE	FALSE	FALSE	FALSE	FALSE	FALSE	FALSE	FALSE	FALSE	FALSE	FALSE
19	LYPD3	NP_055215.2	0	0	-4.3385	-3.35979	-1.942	0.328138	-3.78075	-3.351	-2.96175	FALSE	FALSE	FALSE	FALSE	FALSE	FALSE	TRUE	FALSE	FALSE	FALSE	FALSE	FALSE	FALSE	FALSE
1	FMO5	NP_001452.2	0.000730994	0.0190058	-5.23	-3.56569	-2.35	0.473202	-4.2288	-3.51775	-2.987	FALSE	FALSE	FALSE	FALSE	FALSE	FALSE	FALSE	FALSE	FALSE	FALSE	FALSE	FALSE	FALSE	FALSE
2	PTPN4	NP_002821.1	0.0311976	0.117338	-5.5815	-3.93725	-2.4175	0.591586	-4.7651	-3.908	-3.17	FALSE	FALSE	FALSE	FALSE	FALSE	FALSE	FALSE	FALSE	FALSE	FALSE	FALSE	FALSE	FALSE	FALSE
1	ANGPTL7	NP_066969.1	0	0	-4.465	-3.40142	-2.606	0.308041	-3.85	-3.337	-3.059	FALSE	FALSE	FALSE	FALSE	FALSE	FALSE	FALSE	FALSE	FALSE	FALSE	FALSE	FALSE	FALSE	FALSE
17	MNT	NP_064706.1	0	0.0060307	-4.8075	-3.40533	-1.6465	0.537072	-4.19735	-3.31375	-2.7685	FALSE	FALSE	FALSE	FALSE	FALSE	FALSE	FALSE	FALSE	FALSE	FALSE	FALSE	FALSE	FALSE	FALSE
14	INSM2	NP_115983.3	0	0	-4.4035	-3.34996	-2.122	0.401512	-3.9645	-3.239	-2.9025	FALSE	FALSE	FALSE	FALSE	FALSE	FALSE	FALSE	FALSE	FALSE	FALSE	FALSE	FALSE	FALSE	FALSE
11	TRIM48	NP_077019.2	0	0	-3.7555	-2.87781	-2.1155	0.283206	-3.30515	-2.83025	-2.5565	FALSE	FALSE	FALSE	TRUE	FALSE	FALSE	TRUE	FALSE	FALSE	FALSE	FALSE	FALSE	FALSE	FALSE
1	INAVA	NP_060735.4	0	0	-4.3915	-3.24647	-2.75	0.190804	-3.4797	-3.2035	-3.0775	FALSE	FALSE	FALSE	FALSE	FALSE	FALSE	TRUE	FALSE	FALSE	FALSE	FALSE	FALSE	FALSE	FALSE
10	FAM25A	NP_001139629.1	0	0	-4.4665	-3.4707	-2.0205	0.408478	-3.991	-3.4855	-2.96125	FALSE	FALSE	FALSE	FALSE	FALSE	FALSE	FALSE	FALSE	FALSE	FALSE	FALSE	FALSE	FALSE	FALSE
2	XRCC5	NP_066964.1	0.0720874	0.16208	-5.769	-4.14404	-2.016	0.606876	-4.958	-4.134	-3.3675	FALSE	FALSE	FALSE	FALSE	FALSE	FALSE	FALSE	FALSE	FALSE	FALSE	FALSE	FALSE	FALSE	FALSE
16	PRM3	NP_067070.2	0	0	-3.79	-2.8948	-1.6545	0.297188	-3.32355	-2.8665	-2.5411	FALSE	FALSE	FALSE	FALSE	FALSE	FALSE	FALSE	FALSE	FALSE	FALSE	FALSE	FALSE	FALSE	FALSE
11	C11orf42	NP_775796.2	0	0	-4.4215	-3.17111	-2.601	0.217475	-3.4462	-3.1455	-2.9383	FALSE	FALSE	FALSE	FALSE	FALSE	FALSE	FALSE	FALSE	FALSE	FALSE	FALSE	FALSE	FALSE	FALSE
19	ABHD17A	NP_112490.3	0	0.0289237	-5.0005	-3.60921	-2.913	0.464376	-4.30915	-3.50375	-3.1075	FALSE	FALSE	FALSE	FALSE	FALSE	FALSE	FALSE	FALSE	FALSE	FALSE	FALSE	FALSE	FALSE	FALSE
11	YIF1A	NP_065203.2	0	0	-4.2885	-3.52613	-2.3225	0.344917	-3.9695	-3.54925	-3.062	FALSE	FALSE	FALSE	FALSE	FALSE	FALSE	FALSE	FALSE	FALSE	FALSE	FALSE	FALSE	FALSE	FALSE
1	PRMT6	NP_060607.2	0	0	-4.44	-3.37607	-1.8455	0.402562	-3.95	-3.3385	-2.8792	FALSE	FALSE	FALSE	FALSE	FALSE	FALSE	TRUE	FALSE	FALSE	FALSE	FALSE	FALSE	FALSE	FALSE
1	TMEM240	NP_001108220.1	0	0	-4.05	-3.37955	-1.5255	0.297101	-3.7015	-3.4235	-3.0036	FALSE	FALSE	FALSE	FALSE	FALSE	FALSE	FALSE	FALSE	FALSE	FALSE	TRUE	FALSE	FALSE	TRUE
17	OR1D5	NP_055381.1	0.103352	0.0917144	-5.8645	-3.97012	-2.0195	0.698138	-5.0747	-3.779	-3.252	FALSE	FALSE	FALSE	FALSE	FALSE	FALSE	FALSE	FALSE	FALSE	FALSE	FALSE	FALSE	FALSE	FALSE
5	MSX2	NP_002440.2	0	0	-4.5575	-3.56366	-2.002	0.56316	-4.3293	-3.5595	-2.8305	TRUE	FALSE	TRUE	FALSE	FALSE	FALSE	TRUE	FALSE	FALSE	FALSE	TRUE	FALSE	FALSE	TRUE
16	ITPRIPL2	NP_001030013.1	0	0.0316214	-4.777	-3.36309	-2.4655	0.485093	-4.14285	-3.1995	-2.9035	FALSE	FALSE	FALSE	FALSE	FALSE	FALSE	FALSE	FALSE	FALSE	FALSE	FALSE	FALSE	FALSE	FALSE
9	FRRS1L	NP_055149.3	0	0	-4.2465	-3.44362	-2.259	0.359027	-3.9395	-3.427	-2.97525	FALSE	FALSE	FALSE	FALSE	FALSE	FALSE	TRUE	FALSE	FALSE	FALSE	TRUE	FALSE	FALSE	TRUE
11	TRAF6	NP_665802.1	0.0916003	0.154806	-5.6385	-4.08445	-2.185	0.683174	-5.0302	-4.0645	-3.1793	FALSE	FALSE	FALSE	FALSE	FALSE	FALSE	TRUE	FALSE	FALSE	FALSE	FALSE	FALSE	FALSE	FALSE
2	HNMT	NP_008826.1	0	0	-4.222	-3.5822	-2.2795	0.309248	-3.99845	-3.5895	-3.1801	FALSE	FALSE	FALSE	FALSE	FALSE	FALSE	FALSE	FALSE	FALSE	FALSE	FALSE	FALSE	FALSE	FALSE
8	UTP23	NP_115710.2	0	0	-3.9025	-3.54879	-2.856	0.172365	-3.7906	-3.5465	-3.3244	FALSE	FALSE	FALSE	FALSE	FALSE	FALSE	TRUE	FALSE	FALSE	FALSE	FALSE	FALSE	FALSE	FALSE
17	FAM222B	NP_001275560.1	0	0	-4.537	-3.39212	-2.893	0.266267	-3.74345	-3.3205	-3.142	FALSE	FALSE	FALSE	FALSE	FALSE	FALSE	TRUE	FALSE	FALSE	FALSE	FALSE	FALSE	FALSE	FALSE
9	MTAP	NP_002442.2	0.00191775	0.0362242	-5.2035	-3.58111	-2.5885	0.563294	-4.3869	-3.5235	-2.8611	FALSE	FALSE	FALSE	FALSE	FALSE	FALSE	TRUE	FALSE	FALSE	FALSE	FALSE	FALSE	FALSE	FALSE
1	EPHB2	NP_001296122.1	0.0335279	0.0760846	-5.7435	-3.74934	-2.6295	0.609171	-4.65885	-3.627	-3.055	FALSE	FALSE	FALSE	FALSE	FALSE	FALSE	TRUE	FALSE	FALSE	FALSE	FALSE	FALSE	FALSE	FALSE
6	GNL1	NP_005266.2	0.00703317	0.0708006	-5.37	-3.77989	-2.246	0.524974	-4.5515	-3.703	-3.159	FALSE	FALSE	FALSE	FALSE	FALSE	FALSE	TRUE	FALSE	FALSE	FALSE	FALSE	FALSE	FALSE	FALSE
7	KDM7A	NP_085150.1	0.0338235	0.102786	-5.6515	-3.82791	-2.495	0.615136	-4.74655	-3.7015	-3.1255	FALSE	FALSE	FALSE	FALSE	FALSE	FALSE	FALSE	FALSE	FALSE	FALSE	FALSE	FALSE	FALSE	FALSE
17	ATP6V0A1	NP_001123492.1	0.144977	0.130971	-6.568	-4.1347	-2.3365	0.772717	-5.252	-4.0385	-3.203	FALSE	FALSE	FALSE	FALSE	FALSE	FALSE	FALSE	FALSE	FALSE	FALSE	TRUE	TRUE	TRUE	TRUE
1	KIF17	NP_065867.2	0	0.0057051	-4.7855	-3.40876	-2.4715	0.406189	-4.082	-3.2485	-3.046	FALSE	FALSE	FALSE	FALSE	FALSE	FALSE	FALSE	FALSE	FALSE	FALSE	FALSE	FALSE	FALSE	FALSE
17	P3H4	NP_006446.1	0	0	-4.069	-3.31046	-2.2245	0.266727	-3.65435	-3.3165	-2.9565	FALSE	FALSE	FALSE	FALSE	FALSE	FALSE	TRUE	FALSE	FALSE	FALSE	FALSE	FALSE	FALSE	FALSE
3	ABCF3	NP_060828.2	0.000201654	0.0504134	-5.0765	-3.626	-2.5825	0.530707	-4.427	-3.5325	-2.9975	FALSE	FALSE	FALSE	FALSE	FALSE	FALSE	FALSE	FALSE	FALSE	FALSE	FALSE	FALSE	FALSE	FALSE
X	STK26	NP_057626.2	0.23839	0.24871	-5.771	-4.56176	-2.6615	0.593156	-5.31835	-4.59575	-3.75415	FALSE	FALSE	FALSE	FALSE	FALSE	FALSE	FALSE	FALSE	FALSE	FALSE	FALSE	FALSE	FALSE	FALSE
15	CATSPER2	NP_001269239.1	0	0.00118718	-4.675	-3.58776	-1.575	0.489557	-4.24735	-3.554	-2.9698	FALSE	FALSE	FALSE	FALSE	FALSE	FALSE	FALSE	FALSE	FALSE	FALSE	FALSE	FALSE	FALSE	FALSE
7	RNF148	NP_932351.1	0	0	-3.6795	-3.21006	-2.256	0.264451	-3.56085	-3.2235	-2.8535	FALSE	FALSE	FALSE	FALSE	FALSE	FALSE	FALSE	FALSE	FALSE	FALSE	FALSE	FALSE	FALSE	FALSE
3	EPHA3	NP_005224.2	0	0.023582	-4.8625	-3.58595	-2.06	0.562678	-4.37	-3.5755	-2.844	FALSE	FALSE	FALSE	FALSE	FALSE	FALSE	TRUE	FALSE	FALSE	FALSE	FALSE	FALSE	FALSE	FALSE
Y	KDM5D	NP_001140177.1	0.0255024	0.138899	-5.2625	-4.36424	-3.525	0.284316	-4.812	-4.3155	-4.0545	FALSE	FALSE	FALSE	FALSE	FALSE	FALSE	FALSE	TRUE	FALSE	FALSE	FALSE	FALSE	FALSE	FALSE
17	NAGLU	NP_000254.2	0	0.00178412	-4.8005	-3.48299	-2.339	0.424157	-4.071	-3.453	-2.9435	FALSE	TRUE	FALSE	FALSE	FALSE	FALSE	FALSE	FALSE	FALSE	FALSE	TRUE	FALSE	FALSE	TRUE
21	KRTAP21-1	NP_853650.1	0.0526316	0.159844	-5.322	-3.8758	-0.4185	0.792756	-4.9255	-3.9385	-2.74375	FALSE	FALSE	FALSE	FALSE	FALSE	FALSE	FALSE	FALSE	FALSE	FALSE	FALSE	FALSE	FALSE	FALSE
X	TMEM187	NP_003483.1	0.0154301	0.0519975	-5.1735	-3.6657	-2.7715	0.476681	-4.403	-3.5275	-3.2135	FALSE	FALSE	FALSE	FALSE	FALSE	FALSE	TRUE	FALSE	FALSE	FALSE	FALSE	FALSE	FALSE	FALSE
13	MBNL2	NP_001292999.1	0	0.0461469	-4.9235	-3.88144	-2.5305	0.436245	-4.482	-3.8515	-3.317	FALSE	FALSE	FALSE	FALSE	FALSE	FALSE	FALSE	FALSE	FALSE	FALSE	FALSE	FALSE	FALSE	FALSE
19	ZNF296	NP_660331.1	0	0.00927478	-4.7595	-3.48846	-2.043	0.485236	-4.2441	-3.4025	-2.9224	FALSE	FALSE	FALSE	FALSE	FALSE	FALSE	FALSE	FALSE	FALSE	FALSE	FALSE	FALSE	FALSE	FALSE
2	SESTD1	NP_835224.3	0.00430321	0.0780371	-5.253	-3.80018	-2.906	0.493956	-4.54735	-3.71575	-3.2165	FALSE	FALSE	FALSE	FALSE	FALSE	FALSE	TRUE	FALSE	FALSE	FALSE	FALSE	FALSE	FALSE	FALSE
7	VKORC1L1	NP_001271271.1	0	0	-4.17	-3.64138	-1.482	0.282485	-3.92065	-3.6885	-3.3145	FALSE	FALSE	FALSE	FALSE	FALSE	FALSE	FALSE	FALSE	FALSE	FALSE	FALSE	FALSE	FALSE	FALSE
1	OR2W3	NP_001001957.2	0.0805055	0.0635388	-6.4175	-3.4964	-1.2325	0.919322	-4.90625	-3.2935	-2.5085	FALSE	FALSE	FALSE	FALSE	FALSE	FALSE	TRUE	FALSE	FALSE	FALSE	FALSE	FALSE	FALSE	FALSE
6	PAK1IP1	NP_060376.2	0	0.000912686	-4.7205	-3.64967	-2.6185	0.386574	-4.19535	-3.622	-3.153	FALSE	FALSE	FALSE	FALSE	FALSE	FALSE	FALSE	FALSE	FALSE	FALSE	FALSE	FALSE	FALSE	FALSE
21	KRTAP10-8	NP_941968.2	0.183682	0.0803213	-6.565	-3.83287	-1.3695	1.13255	-5.607	-3.54	-2.61	FALSE	FALSE	FALSE	FALSE	FALSE	FALSE	FALSE	FALSE	FALSE	FALSE	FALSE	FALSE	FALSE	FALSE
13	SPART	NP_055902.1	0	0	-4.3825	-3.41107	-2.024	0.37539	-3.93	-3.381	-2.941	FALSE	FALSE	FALSE	FALSE	FALSE	FALSE	FALSE	FALSE	FALSE	FALSE	FALSE	FALSE	FALSE	FALSE
9	ACO1	NP_002188.1	0	0	-4.521	-3.53844	-2.6045	0.329793	-4.01	-3.493	-3.143	FALSE	FALSE	FALSE	FALSE	FALSE	FALSE	TRUE	FALSE	FALSE	FALSE	FALSE	FALSE	FALSE	FALSE
5	ZDHHC11B	NP_001338232.1	0	0.0256913	-4.9915	-3.56241	-1.5585	0.521339	-4.2433	-3.557	-2.9047	FALSE	FALSE	FALSE	FALSE	FALSE	FALSE	FALSE	TRUE	FALSE	FALSE	FALSE	FALSE	FALSE	FALSE
6	PPIL6	NP_001104768.2	0	0	-4.558	-3.72097	-2.174	0.428306	-4.261	-3.74775	-3.1635	FALSE	FALSE	FALSE	FALSE	FALSE	FALSE	TRUE	FALSE	FALSE	FALSE	FALSE	FALSE	FALSE	FALSE
7	PIP	NP_002643.1	0	0	-3.8775	-3.34222	-2.6575	0.175308	-3.564	-3.3475	-3.116	FALSE	FALSE	FALSE	FALSE	FALSE	FALSE	FALSE	FALSE	FALSE	FALSE	FALSE	FALSE	FALSE	FALSE
1	CC2D1B	NP_115825.1	0	0	-4.57	-3.37553	-2.143	0.440521	-3.9815	-3.3595	-2.805	FALSE	FALSE	FALSE	FALSE	FALSE	FALSE	FALSE	FALSE	FALSE	FALSE	FALSE	FALSE	FALSE	FALSE
5	FAM170A	NP_877438.2	0	0	-3.9195	-3.32386	-2.094	0.254116	-3.6715	-3.329	-3.014	FALSE	FALSE	FALSE	FALSE	FALSE	FALSE	FALSE	FALSE	FALSE	FALSE	FALSE	FALSE	FALSE	FALSE
2	LRRTM1	NP_849161.2	0.00300456	0.076668	-5.219	-3.67492	-2.2955	0.582032	-4.54295	-3.593	-2.972	FALSE	FALSE	FALSE	FALSE	FALSE	FALSE	FALSE	FALSE	FALSE	FALSE	FALSE	FALSE	FALSE	FALSE
14	JKAMP	NP_001271130.1	0.0119943	0.10956	-5.337	-3.9603	-2.619	0.504513	-4.673	-3.9115	-3.3395	FALSE	FALSE	FALSE	FALSE	FALSE	FALSE	FALSE	FALSE	FALSE	FALSE	FALSE	FALSE	FALSE	FALSE
11	FAM76B	NP_653265.3	0	0.0331563	-4.895	-3.68981	-2.6605	0.478229	-4.3494	-3.6545	-3.0855	FALSE	FALSE	FALSE	FALSE	FALSE	FALSE	FALSE	FALSE	FALSE	FALSE	FALSE	FALSE	FALSE	FALSE
X	SPANXA1	NP_038481.2	0.988372	0.00979192	-7.5645	-6.70811	-4.4745	0.568279	-7.3727	-6.77325	-6.0005	FALSE	FALSE	FALSE	FALSE	FALSE	FALSE	FALSE	TRUE	TRUE	FALSE	FALSE	FALSE	FALSE	FALSE
6	FAM83B	NP_001010872.1	0	0	-4.307	-3.42803	-1.961	0.315384	-3.8952	-3.397	-3.0598	FALSE	FALSE	FALSE	FALSE	FALSE	FALSE	TRUE	FALSE	FALSE	FALSE	FALSE	FALSE	FALSE	FALSE
15	VPS18	NP_065908.1	0.000223726	0.0231557	-5.114	-3.39759	-2.193	0.518483	-4.2132	-3.245	-2.8685	FALSE	FALSE	FALSE	FALSE	FALSE	FALSE	FALSE	FALSE	FALSE	FALSE	FALSE	FALSE	FALSE	FALSE
10	LRRC27	NP_001137229.1	0	0	-3.704	-3.24124	-1.9855	0.269294	-3.589	-3.2875	-2.841	FALSE	FALSE	FALSE	FALSE	FALSE	FALSE	FALSE	FALSE	FALSE	FALSE	FALSE	FALSE	FALSE	FALSE
4	IL2	NP_000577.2	0	0.0257998	-4.845	-3.94804	-2.498	0.318239	-4.36	-3.9375	-3.5736	FALSE	FALSE	FALSE	FALSE	FALSE	FALSE	TRUE	FALSE	FALSE	FALSE	FALSE	FALSE	FALSE	FALSE
7	GALNTL5	NP_660335.2	0	0	-4.155	-3.55161	-1.582	0.360779	-3.9915	-3.592	-3.0385	FALSE	FALSE	FALSE	FALSE	FALSE	FALSE	FALSE	FALSE	FALSE	FALSE	FALSE	FALSE	FALSE	FALSE
17	RPS6KB1	NP_003152.1	0.447207	0.156442	-6.8895	-4.97429	-3.0615	0.853264	-6.20835	-4.8885	-3.8845	FALSE	FALSE	FALSE	FALSE	FALSE	FALSE	FALSE	FALSE	FALSE	FALSE	FALSE	FALSE	FALSE	FALSE
3	NME9	NP_835231.1	0	0	-4.3065	-3.72279	-2.333	0.322774	-4.11735	-3.7535	-3.28495	FALSE	FALSE	FALSE	FALSE	FALSE	FALSE	FALSE	FALSE	FALSE	FALSE	FALSE	FALSE	FALSE	FALSE
7	ARF5	NP_001653.1	0.20013	0.191683	-6.0805	-4.36482	-2.5275	0.724266	-5.3273	-4.3885	-3.3742	FALSE	FALSE	FALSE	FALSE	FALSE	FALSE	FALSE	FALSE	FALSE	FALSE	FALSE	FALSE	FALSE	FALSE
18	ZNF516	NP_055458.1	0.0196059	0.0284859	-5.855	-3.27188	-1.554	0.581295	-4.0215	-3.168	-2.706	FALSE	FALSE	FALSE	FALSE	FALSE	FALSE	TRUE	FALSE	FALSE	FALSE	FALSE	FALSE	FALSE	FALSE
11	PLAAT5	NP_473449.2	0	0	-4.5295	-3.38282	-2.355	0.366356	-3.921	-3.3165	-2.9671	FALSE	FALSE	FALSE	FALSE	FALSE	FALSE	FALSE	FALSE	FALSE	FALSE	FALSE	FALSE	FALSE	FALSE
2	RBM43	NP_940959.1	0	0	-4.3495	-3.62203	-2.543	0.336389	-4.04505	-3.663	-3.14145	FALSE	FALSE	FALSE	FALSE	FALSE	FALSE	FALSE	FALSE	FALSE	FALSE	FALSE	FALSE	FALSE	FALSE
3	TMEM41A	NP_542383.1	0	0.000521105	-4.648	-3.67385	-2.2575	0.464038	-4.2895	-3.6755	-3.0527	FALSE	FALSE	FALSE	FALSE	FALSE	FALSE	FALSE	FALSE	FALSE	FALSE	FALSE	FALSE	FALSE	FALSE
11	PIH1D2	NP_001076088.1	0	0	-4.5765	-3.50774	-2.329	0.270698	-3.8625	-3.4875	-3.1978	FALSE	FALSE	FALSE	FALSE	FALSE	FALSE	FALSE	FALSE	FALSE	FALSE	FALSE	FALSE	FALSE	FALSE
4	PYURF	NP_116295.1	0	0	-4.603	-3.74212	-1.9165	0.46676	-4.2675	-3.8205	-3.068	FALSE	FALSE	FALSE	FALSE	FALSE	FALSE	FALSE	FALSE	FALSE	FALSE	FALSE	FALSE	FALSE	FALSE
1	EMC1	NP_055862.1	0	0.0103936	-4.9945	-3.58146	-2.478	0.430137	-4.19815	-3.5225	-3.0635	FALSE	FALSE	FALSE	FALSE	FALSE	FALSE	FALSE	FALSE	FALSE	FALSE	TRUE	FALSE	FALSE	TRUE
3	PTPN23	NP_056281.1	0	0	-4.4685	-3.41867	-2.5325	0.395598	-4.039	-3.3485	-2.9545	FALSE	FALSE	FALSE	FALSE	FALSE	FALSE	FALSE	FALSE	FALSE	FALSE	FALSE	FALSE	FALSE	FALSE
10	ZNF438	NP_001137238.1	0	0	-4.26	-3.51066	-2.0585	0.444855	-4.0885	-3.5785	-2.847	FALSE	FALSE	FALSE	FALSE	FALSE	FALSE	FALSE	FALSE	FALSE	FALSE	FALSE	FALSE	FALSE	FALSE
3	MST1	NP_066278.3	0	0	-4.193	-3.37356	-2.692	0.291815	-3.793	-3.3345	-3.0175	FALSE	FALSE	FALSE	TRUE	FALSE	FALSE	FALSE	FALSE	FALSE	FALSE	FALSE	FALSE	FALSE	FALSE
X	GPKOW	NP_056513.2	0.014271	0.0996689	-5.457	-3.90156	-1.9885	0.540681	-4.66	-3.8615	-3.229	FALSE	FALSE	FALSE	FALSE	FALSE	FALSE	FALSE	FALSE	FALSE	FALSE	FALSE	FALSE	FALSE	FALSE
4	AP1AR	NP_061039.3	0	0	-4.1705	-3.42489	-2.2325	0.315749	-3.8495	-3.422	-3.023	FALSE	FALSE	FALSE	FALSE	FALSE	FALSE	FALSE	FALSE	FALSE	FALSE	FALSE	FALSE	FALSE	FALSE
16	NOL3	NP_001263241.1	0	0	-3.932	-3.25165	-2.29	0.203412	-3.5047	-3.258	-3.0035	FALSE	FALSE	FALSE	FALSE	FALSE	FALSE	FALSE	FALSE	FALSE	FALSE	FALSE	FALSE	FALSE	FALSE
2	CCDC141	NP_775919.3	0	0	-4.0885	-3.34043	-2.072	0.262311	-3.6515	-3.3625	-2.98565	FALSE	FALSE	FALSE	FALSE	FALSE	FALSE	TRUE	FALSE	FALSE	FALSE	FALSE	FALSE	FALSE	FALSE
7	DTX2	NP_001096064.1	0	0.0418923	-5.038	-3.53349	-1.2635	0.466534	-4.2529	-3.382	-3.1165	FALSE	FALSE	FALSE	FALSE	FALSE	FALSE	FALSE	FALSE	FALSE	FALSE	FALSE	FALSE	FALSE	FALSE
22	CDC45	NP_001171481.1	0.0128799	0.0457746	-5.572	-3.53028	-2.363	0.576097	-4.388	-3.394	-2.901	FALSE	FALSE	FALSE	FALSE	FALSE	FALSE	FALSE	FALSE	FALSE	FALSE	TRUE	FALSE	FALSE	TRUE
19	DAPK3	NP_001339.1	0.00127592	0.0472089	-5.427	-3.48343	-2.3835	0.591103	-4.41705	-3.314	-2.8505	FALSE	FALSE	FALSE	FALSE	FALSE	FALSE	FALSE	FALSE	FALSE	FALSE	FALSE	FALSE	FALSE	FALSE
2	BOLL	NP_001271290.1	0	0	-4.485	-3.72803	-2.7545	0.438329	-4.362	-3.676	-3.1603	FALSE	FALSE	FALSE	FALSE	FALSE	FALSE	TRUE	FALSE	FALSE	FALSE	FALSE	FALSE	FALSE	FALSE
7	CASTOR2	NP_001138536.1	0.0652632	0.1417	-5.496	-4.06462	-2.42	0.600015	-4.9453	-3.9965	-3.329	FALSE	FALSE	FALSE	FALSE	FALSE	FALSE	FALSE	FALSE	FALSE	FALSE	FALSE	FALSE	FALSE	FALSE
20	ZNF133	NP_001269928.2	0.0810998	0.0744341	-6.0145	-3.90266	-2.718	0.669605	-4.922	-3.7245	-3.217	FALSE	FALSE	FALSE	FALSE	FALSE	FALSE	TRUE	FALSE	FALSE	FALSE	FALSE	FALSE	FALSE	FALSE
18	PTPRM	NP_001098714.1	0.00242576	0.0488459	-5.2655	-3.68251	-2.1415	0.485821	-4.394	-3.59975	-3.131	FALSE	FALSE	FALSE	FALSE	FALSE	FALSE	TRUE	FALSE	FALSE	FALSE	FALSE	FALSE	FALSE	FALSE
19	PLAUR	NP_002650.1	0	0	-4.4415	-3.46174	-2.1035	0.369867	-3.998	-3.4405	-2.999	FALSE	FALSE	FALSE	FALSE	FALSE	FALSE	TRUE	FALSE	FALSE	FALSE	FALSE	FALSE	FALSE	FALSE
4	JCHAIN	NP_653247.1	0	0	-4.1135	-3.64466	-3.0155	0.113177	-3.776	-3.644	-3.5155	FALSE	FALSE	FALSE	FALSE	FALSE	FALSE	FALSE	FALSE	FALSE	FALSE	FALSE	FALSE	FALSE	FALSE
1	C1orf112	NP_001306976.1	0	0.0113714	-4.8925	-3.66914	-2.051	0.391635	-4.1629	-3.6685	-3.183	FALSE	FALSE	FALSE	FALSE	FALSE	FALSE	FALSE	FALSE	FALSE	FALSE	FALSE	FALSE	FALSE	FALSE
16	CALB2	NP_001731.2	0	0	-4.532	-3.40655	-2.017	0.467997	-4.06475	-3.38025	-2.816	FALSE	FALSE	FALSE	FALSE	FALSE	FALSE	FALSE	FALSE	FALSE	FALSE	FALSE	FALSE	FALSE	FALSE
2	ARL6IP6	NP_689735.1	0	0	-4.4305	-3.13076	-1.993	0.462754	-3.80245	-3.0595	-2.58205	FALSE	FALSE	FALSE	FALSE	FALSE	FALSE	FALSE	FALSE	FALSE	FALSE	FALSE	FALSE	FALSE	FALSE
18	CPLX4	NP_857637.1	0	0.000993049	-4.696	-3.59396	-2.1145	0.425931	-4.1365	-3.6085	-3.032	FALSE	FALSE	FALSE	FALSE	FALSE	FALSE	FALSE	FALSE	FALSE	FALSE	FALSE	FALSE	FALSE	FALSE
19	KLK4	NP_004908.4	0	0	-4.126	-3.41621	-2.348	0.342931	-3.89305	-3.403	-2.9834	FALSE	TRUE	FALSE	FALSE	FALSE	FALSE	FALSE	FALSE	FALSE	FALSE	FALSE	FALSE	FALSE	FALSE
16	FUS	NP_004951.1	0.0255895	0.0784445	-5.478	-3.74789	-1.8265	0.639123	-4.6313	-3.716	-2.9445	FALSE	TRUE	FALSE	FALSE	FALSE	FALSE	FALSE	FALSE	FALSE	FALSE	FALSE	FALSE	FALSE	FALSE
21	KRTAP20-3	NP_001121549.1	0	0	-3.713	-3.46598	-2.7105	0.170038	-3.6433	-3.51925	-3.21855	FALSE	FALSE	FALSE	FALSE	FALSE	FALSE	FALSE	FALSE	FALSE	FALSE	FALSE	FALSE	FALSE	FALSE
17	DHX33	NP_064547.2	0	0.0136203	-4.8945	-3.54781	-2.299	0.515967	-4.27385	-3.506	-2.89115	FALSE	FALSE	FALSE	FALSE	FALSE	FALSE	FALSE	FALSE	FALSE	FALSE	FALSE	FALSE	FALSE	FALSE
16	CDYL2	NP_689555.2	0	0.00368568	-4.8045	-3.39051	-2.299	0.477206	-4.1137	-3.298	-2.835	FALSE	FALSE	FALSE	FALSE	FALSE	FALSE	TRUE	FALSE	FALSE	FALSE	FALSE	FALSE	FALSE	FALSE
18	SKA1	NP_001034624.1	0	0.0253722	-4.9845	-3.65079	-2.1645	0.484617	-4.304	-3.634	-3.0375	FALSE	FALSE	FALSE	FALSE	FALSE	FALSE	TRUE	FALSE	FALSE	FALSE	FALSE	FALSE	FALSE	FALSE
5	SLC25A2	NP_114153.1	0	0	-4.0065	-3.47782	-2.7315	0.231457	-3.79	-3.4745	-3.1825	FALSE	FALSE	FALSE	FALSE	FALSE	FALSE	FALSE	FALSE	FALSE	FALSE	FALSE	FALSE	FALSE	FALSE
19	TBXA2R	NP_001051.1	0	0	-4.43	-3.33265	-1.5185	0.504132	-3.9965	-3.337	-2.6625	TRUE	FALSE	FALSE	FALSE	FALSE	FALSE	FALSE	FALSE	FALSE	FALSE	FALSE	FALSE	FALSE	FALSE
6	H2BC1	NP_733759.1	0.235736	0.0804954	-6.0665	-3.68395	-0.9105	1.38701	-5.7305	-3.512	-2.024	FALSE	FALSE	FALSE	FALSE	FALSE	FALSE	FALSE	FALSE	FALSE	FALSE	FALSE	FALSE	FALSE	FALSE
16	USP31	NP_065769.3	0.0129576	0.0577204	-5.3565	-3.52128	-2.4295	0.554852	-4.406	-3.3875	-2.9465	FALSE	FALSE	FALSE	FALSE	FALSE	FALSE	FALSE	FALSE	FALSE	FALSE	FALSE	FALSE	FALSE	FALSE
1	OR6K2	NP_001005279.1	0.0242382	0.0818906	-5.7045	-3.51397	-1.8025	0.798584	-4.648	-3.4665	-2.485	FALSE	FALSE	FALSE	FALSE	FALSE	FALSE	FALSE	FALSE	FALSE	FALSE	FALSE	FALSE	FALSE	FALSE
12	ZNF605	NP_899061.1	0.0790183	0.0578806	-6.3115	-3.76744	-2.625	0.702846	-4.887	-3.5035	-3.139	FALSE	FALSE	FALSE	FALSE	FALSE	FALSE	FALSE	FALSE	FALSE	FALSE	FALSE	FALSE	FALSE	FALSE
7	CCDC71L	NP_787080.2	0	0.000236016	-4.638	-2.9712	-2.045	0.221747	-3.1385	-2.978	-2.7348	FALSE	FALSE	FALSE	FALSE	FALSE	FALSE	FALSE	FALSE	FALSE	FALSE	FALSE	FALSE	FALSE	FALSE
9	CCIN	NP_005884.2	0	0	-3.8995	-3.3534	-2.383	0.216679	-3.6434	-3.357	-3.0725	FALSE	FALSE	FALSE	FALSE	FALSE	FALSE	FALSE	FALSE	FALSE	FALSE	FALSE	FALSE	FALSE	FALSE
7	TAS2R3	NP_058639.1	0.00194932	0.0366826	-5.264	-3.53908	-1.9455	0.548436	-4.3274	-3.447	-2.9066	FALSE	FALSE	FALSE	FALSE	FALSE	FALSE	FALSE	FALSE	FALSE	FALSE	FALSE	FALSE	FALSE	FALSE
22	CYB5R3	NP_000389.1	0	0	-4.148	-3.16502	-1.736	0.388043	-3.6798	-3.17	-2.6527	FALSE	TRUE	FALSE	FALSE	FALSE	FALSE	TRUE	FALSE	FALSE	FALSE	TRUE	FALSE	FALSE	TRUE
11	ACRV1	NP_064493.1	0	0.0018797	-4.6535	-3.83247	-1.856	0.424414	-4.36125	-3.861	-3.27575	FALSE	FALSE	FALSE	FALSE	FALSE	FALSE	FALSE	FALSE	FALSE	FALSE	FALSE	FALSE	FALSE	FALSE
14	STON2	NP_001243359.1	0	0.00376447	-4.935	-3.48858	-2.333	0.376456	-4.0241	-3.4365	-3.0494	FALSE	FALSE	FALSE	FALSE	FALSE	FALSE	TRUE	FALSE	FALSE	FALSE	FALSE	FALSE	FALSE	FALSE
11	SIGIRR	NP_068577.2	0	0	-4.5935	-3.22992	-2.177	0.335503	-3.7145	-3.1595	-2.888	FALSE	FALSE	FALSE	FALSE	FALSE	FALSE	FALSE	FALSE	FALSE	FALSE	FALSE	FALSE	FALSE	FALSE
3	POC1A	NP_056241.3	0	0	-4.5605	-3.58082	-1.9175	0.419781	-4.1515	-3.57	-3.04095	FALSE	FALSE	FALSE	FALSE	FALSE	FALSE	TRUE	FALSE	FALSE	FALSE	TRUE	FALSE	FALSE	TRUE
6	LY6G6F-LY6G6D	NP_001340263.1	0	0	-4.294	-3.51024	-2.1105	0.268848	-3.846	-3.5145	-3.1835	FALSE	FALSE	FALSE	FALSE	FALSE	FALSE	FALSE	FALSE	FALSE	FALSE	FALSE	FALSE	FALSE	FALSE
3	SLC6A1	NP_003033.3	0.462764	0.100541	-7.494	-4.85698	-2.2055	1.25213	-6.5118	-4.9045	-3.1292	FALSE	FALSE	TRUE	FALSE	FALSE	FALSE	FALSE	FALSE	FALSE	FALSE	TRUE	TRUE	TRUE	TRUE
6	ENPP1	NP_006199.2	6.41849e-05	0.0433248	-5.0785	-3.70625	-2.102	0.534705	-4.4385	-3.686	-3.013	FALSE	TRUE	FALSE	FALSE	FALSE	FALSE	FALSE	FALSE	FALSE	FALSE	TRUE	FALSE	FALSE	TRUE
6	TRIM31	NP_008959.3	0	0.000968679	-4.6775	-3.65261	-2.126	0.409911	-4.247	-3.628	-3.14215	FALSE	FALSE	FALSE	FALSE	FALSE	FALSE	TRUE	FALSE	FALSE	FALSE	FALSE	FALSE	FALSE	FALSE
X	DCAF8L2	NP_001340379.1	0.0436288	0.206787	-5.5195	-4.1908	-1.4985	0.563574	-4.9035	-4.226	-3.4284	FALSE	FALSE	FALSE	FALSE	FALSE	FALSE	FALSE	FALSE	FALSE	FALSE	FALSE	FALSE	FALSE	FALSE
22	DGCR6L	NP_150282.2	0	0	-4.088	-3.57288	-2.5725	0.219788	-3.8303	-3.5995	-3.27985	FALSE	FALSE	FALSE	FALSE	FALSE	FALSE	FALSE	FALSE	FALSE	FALSE	FALSE	FALSE	FALSE	FALSE
13	THSD1	NP_061146.1	0	0	-4.3665	-3.39775	-2.0165	0.338078	-3.8543	-3.364	-3.0042	FALSE	FALSE	FALSE	FALSE	FALSE	FALSE	TRUE	FALSE	FALSE	FALSE	FALSE	FALSE	FALSE	FALSE
22	MORC2	NP_001290185.1	0.00699301	0.0696146	-5.388	-3.86943	-2.68	0.449417	-4.5285	-3.788	-3.361	FALSE	FALSE	FALSE	FALSE	FALSE	FALSE	FALSE	FALSE	FALSE	FALSE	TRUE	TRUE	TRUE	TRUE
X	HDX	NP_653258.2	0	0	-4.456	-3.78892	-2.454	0.246205	-4.135	-3.7855	-3.4945	FALSE	FALSE	FALSE	FALSE	FALSE	FALSE	FALSE	FALSE	FALSE	FALSE	FALSE	FALSE	FALSE	FALSE
22	TOM1	NP_001129204.1	0	0	-4.4165	-3.48475	-2.34	0.373259	-4.00535	-3.461	-3.01165	FALSE	FALSE	FALSE	FALSE	FALSE	FALSE	TRUE	FALSE	FALSE	FALSE	FALSE	FALSE	FALSE	FALSE
17	KRT28	NP_853513.2	0.0130537	0.0552701	-5.259	-3.50416	-1.7825	0.587179	-4.4435	-3.281	-2.9695	FALSE	FALSE	FALSE	FALSE	FALSE	FALSE	FALSE	FALSE	FALSE	FALSE	FALSE	FALSE	FALSE	FALSE
18	DSG3	NP_001935.2	0	0	-4.3845	-3.51322	-2.131	0.345892	-3.986	-3.491	-3.089	FALSE	FALSE	FALSE	FALSE	FALSE	FALSE	TRUE	FALSE	FALSE	FALSE	FALSE	FALSE	FALSE	FALSE
22	CCT8L2	NP_055221.1	0	0.000413608	-4.6835	-3.38779	-1.592	0.431801	-4.019	-3.323	-2.8745	FALSE	FALSE	FALSE	FALSE	FALSE	FALSE	FALSE	FALSE	FALSE	FALSE	FALSE	FALSE	FALSE	FALSE
1	LAMB3	NP_000219.2	0	0	-4.087	-3.25928	-2.0735	0.278394	-3.6145	-3.236	-2.93245	FALSE	TRUE	FALSE	FALSE	FALSE	FALSE	FALSE	FALSE	FALSE	FALSE	FALSE	FALSE	FALSE	TRUE
2	TOGARAM2	NP_954974.2	0	0	-4.078	-3.33894	-2.04	0.337451	-3.8415	-3.29825	-2.9335	FALSE	FALSE	FALSE	FALSE	FALSE	FALSE	FALSE	FALSE	FALSE	FALSE	FALSE	FALSE	FALSE	FALSE
11	NNMT	NP_006160.1	0	0	-4.186	-3.31459	-2.2985	0.37065	-3.83225	-3.302	-2.833	FALSE	FALSE	FALSE	FALSE	FALSE	FALSE	FALSE	FALSE	FALSE	FALSE	FALSE	FALSE	FALSE	FALSE
20	CST5	NP_001891.2	0	0	-3.886	-3.09232	-1.698	0.324328	-3.52685	-3.0755	-2.70415	FALSE	FALSE	FALSE	FALSE	FALSE	FALSE	TRUE	FALSE	FALSE	FALSE	FALSE	FALSE	FALSE	FALSE
7	CRCP	NP_055293.1	0	0	-4.571	-3.59219	-2.895	0.273357	-3.9664	-3.5655	-3.2682	FALSE	FALSE	FALSE	FALSE	FALSE	FALSE	FALSE	FALSE	FALSE	FALSE	FALSE	FALSE	FALSE	FALSE
16	TLCD3B	NP_113666.2	0	0.00102796	-4.6985	-3.61929	-2.551	0.431037	-4.20935	-3.61	-3.041	FALSE	FALSE	FALSE	FALSE	FALSE	FALSE	FALSE	FALSE	FALSE	FALSE	FALSE	FALSE	FALSE	FALSE
17	CNP	NP_149124.3	0	0.019802	-5.0305	-3.44259	-1.993	0.424474	-4.028	-3.374	-2.98875	FALSE	FALSE	FALSE	FALSE	FALSE	FALSE	FALSE	FALSE	FALSE	FALSE	FALSE	FALSE	FALSE	FALSE
3	ROBO2	NP_002933.1	0.000245751	0.0193324	-5.236	-3.50067	-2.9605	0.428352	-4.1818	-3.362	-3.0725	TRUE	FALSE	FALSE	FALSE	FALSE	FALSE	TRUE	FALSE	FALSE	FALSE	FALSE	FALSE	FALSE	FALSE
14	OSGEP	NP_060277.1	0	0	-4.601	-3.49604	-2.5945	0.381241	-4.049	-3.44125	-3.042	FALSE	FALSE	FALSE	FALSE	FALSE	FALSE	FALSE	FALSE	FALSE	FALSE	TRUE	FALSE	FALSE	TRUE
11	SNX15	NP_680086.2	0	0	-4.4445	-3.46955	-2.848	0.319346	-3.937	-3.409	-3.099	FALSE	FALSE	FALSE	FALSE	FALSE	FALSE	FALSE	FALSE	FALSE	FALSE	FALSE	FALSE	FALSE	FALSE
10	MINDY3	NP_079224.1	0	0	-4.588	-3.60315	-2.0125	0.499444	-4.304	-3.579	-2.9635	FALSE	FALSE	FALSE	FALSE	FALSE	FALSE	FALSE	FALSE	FALSE	FALSE	FALSE	FALSE	FALSE	FALSE
20	ABHD12	NP_001035937.1	0.00849951	0.0503432	-5.384	-3.52835	-2.1345	0.619487	-4.4155	-3.457	-2.765	FALSE	TRUE	FALSE	FALSE	FALSE	FALSE	TRUE	FALSE	FALSE	FALSE	FALSE	FALSE	FALSE	FALSE
17	SCO1	NP_004580.1	0	0.00886144	-4.813	-3.5822	-2.348	0.504871	-4.261	-3.56875	-2.90365	FALSE	TRUE	FALSE	FALSE	FALSE	FALSE	FALSE	FALSE	FALSE	FALSE	TRUE	FALSE	FALSE	TRUE
14	FOS	NP_005243.1	0.0168671	0.0377948	-5.3605	-3.73518	-2.1405	0.453894	-4.3039	-3.718	-3.2156	FALSE	FALSE	FALSE	FALSE	FALSE	FALSE	TRUE	FALSE	FALSE	FALSE	FALSE	FALSE	FALSE	FALSE
10	CSGALNACT2	NP_061060.3	0	0.00310274	-4.724	-3.59554	-1.98	0.493449	-4.2495	-3.6045	-2.92455	FALSE	FALSE	FALSE	FALSE	FALSE	FALSE	TRUE	FALSE	FALSE	FALSE	FALSE	FALSE	FALSE	FALSE
17	KRTAP4-4	NP_115913.1	0.119848	0.111287	-5.9855	-3.79882	-0.331	0.920118	-5.1887	-3.6035	-2.7433	FALSE	FALSE	FALSE	FALSE	FALSE	FALSE	FALSE	FALSE	FALSE	FALSE	FALSE	FALSE	FALSE	FALSE
21	C21orf91	NP_001093890.1	0	0	-3.8995	-3.6377	-2.542	0.185772	-3.8697	-3.6565	-3.3973	FALSE	FALSE	FALSE	FALSE	FALSE	FALSE	FALSE	FALSE	FALSE	FALSE	FALSE	FALSE	FALSE	FALSE
4	TMEM192	NP_001093859.1	0	0	-4.447	-3.62827	-2.2445	0.408648	-4.16675	-3.645	-3.073	FALSE	FALSE	FALSE	FALSE	FALSE	FALSE	TRUE	FALSE	FALSE	FALSE	FALSE	FALSE	FALSE	FALSE
5	HMHB1	NP_067005.1	0	0	-3.65	-3.38335	-3.232	0.0815351	-3.492	-3.374	-3.283	FALSE	FALSE	FALSE	FALSE	FALSE	FALSE	FALSE	FALSE	FALSE	FALSE	FALSE	FALSE	FALSE	FALSE
15	GOLGA8J	NP_001269401.1	0	0.0218987	-4.9295	-3.72085	-1.757	0.492669	-4.4225	-3.6655	-3.1225	FALSE	FALSE	FALSE	FALSE	FALSE	FALSE	FALSE	TRUE	FALSE	FALSE	FALSE	FALSE	FALSE	FALSE
16	PDPK1	NP_002604.1	0.539237	0.117239	-7.0575	-5.23744	-3.012	1.04112	-6.6995	-5.203	-3.879	FALSE	FALSE	FALSE	FALSE	FALSE	FALSE	TRUE	TRUE	FALSE	FALSE	FALSE	FALSE	FALSE	FALSE
8	ESCO2	NP_001017420.1	0.0252155	0.0440125	-5.266	-3.52064	-2.045	0.518539	-4.329	-3.393	-3.06175	FALSE	TRUE	FALSE	FALSE	FALSE	FALSE	FALSE	FALSE	FALSE	FALSE	TRUE	FALSE	FALSE	TRUE
10	PRTFDC1	NP_064585.1	0.00182537	0.078491	-5.183	-3.76311	-2.1825	0.598627	-4.5652	-3.77	-2.9616	FALSE	FALSE	FALSE	FALSE	FALSE	FALSE	TRUE	FALSE	FALSE	FALSE	FALSE	FALSE	FALSE	FALSE
5	OTULIN	NP_612357.4	0	0.0808901	-4.8775	-3.83496	-1.8955	0.530818	-4.5794	-3.79875	-3.1516	FALSE	FALSE	FALSE	FALSE	FALSE	FALSE	FALSE	FALSE	FALSE	FALSE	TRUE	FALSE	FALSE	TRUE
3	SMCO1	NP_001071125.1	0	0	-4.5495	-3.58527	-2.3855	0.253018	-3.8727	-3.6125	-3.2535	FALSE	FALSE	FALSE	FALSE	FALSE	FALSE	FALSE	FALSE	FALSE	FALSE	FALSE	FALSE	FALSE	FALSE
20	SLC2A4RG	NP_064446.2	0	0.0114416	-5.041	-3.28748	-2.1545	0.566455	-4.089	-3.18375	-2.6085	FALSE	FALSE	FALSE	FALSE	FALSE	FALSE	TRUE	FALSE	FALSE	FALSE	FALSE	FALSE	FALSE	FALSE
8	LY6H	NP_002338.3	0	0	-4.236	-3.47887	-2.138	0.390045	-4.0985	-3.434	-3.0075	FALSE	FALSE	FALSE	FALSE	FALSE	FALSE	FALSE	FALSE	FALSE	FALSE	FALSE	FALSE	FALSE	FALSE
5	RNF145	NP_001186309.1	0.22192	0.159425	-6.177	-4.30951	-2.4815	0.818333	-5.413	-4.305	-3.2005	FALSE	FALSE	FALSE	FALSE	FALSE	FALSE	TRUE	FALSE	FALSE	FALSE	FALSE	FALSE	FALSE	FALSE
4	ANXA5	NP_001145.1	0	0.00118084	-4.678	-3.57628	-2.6735	0.376003	-4.11165	-3.534	-3.11935	FALSE	FALSE	FALSE	FALSE	FALSE	FALSE	TRUE	FALSE	FALSE	FALSE	FALSE	FALSE	FALSE	FALSE
2	HIBCH	NP_055177.2	0.0246328	0.0604345	-5.678	-3.67683	-1.5795	0.590989	-4.55	-3.51975	-3.0505	FALSE	TRUE	FALSE	FALSE	FALSE	FALSE	TRUE	FALSE	FALSE	FALSE	TRUE	FALSE	FALSE	TRUE
11	POLR2G	NP_002687.1	0.0374613	0.249845	-5.319	-4.256	-1.783	0.522952	-4.9245	-4.2905	-3.55395	FALSE	FALSE	FALSE	FALSE	FALSE	FALSE	FALSE	FALSE	FALSE	FALSE	FALSE	FALSE	FALSE	FALSE
15	CHRNA3	NP_000734.2	0	0	-4.4755	-3.63745	-2.4585	0.382077	-4.142	-3.6505	-3.107	FALSE	FALSE	FALSE	FALSE	FALSE	FALSE	TRUE	FALSE	FALSE	FALSE	TRUE	FALSE	FALSE	TRUE
12	OR2AP1	NP_001245214.1	0.0657463	0.0790336	-6.178	-3.36667	-2.0635	0.980009	-4.854	-3.1935	-2.1927	FALSE	FALSE	FALSE	FALSE	FALSE	FALSE	FALSE	FALSE	FALSE	FALSE	FALSE	FALSE	FALSE	FALSE
1	CAPN2	NP_001139540.1	0.000176913	0.0152145	-5.081	-3.46445	-2.506	0.442195	-4.1218	-3.3575	-2.9855	FALSE	FALSE	FALSE	FALSE	FALSE	FALSE	TRUE	FALSE	FALSE	FALSE	FALSE	FALSE	FALSE	FALSE
1	CMPK1	NP_057392.1	0	0.0257437	-4.742	-3.9432	-2.5635	0.409448	-4.48725	-3.947	-3.395	FALSE	FALSE	FALSE	FALSE	FALSE	FALSE	FALSE	FALSE	FALSE	FALSE	FALSE	FALSE	FALSE	FALSE
1	SLC35A3	NP_036375.1	0	0.0176003	-4.711	-3.95711	-2.117	0.499726	-4.4995	-4.0805	-3.2223	FALSE	FALSE	FALSE	FALSE	FALSE	FALSE	FALSE	FALSE	FALSE	FALSE	FALSE	FALSE	FALSE	FALSE
8	PPP1R16A	NP_001316371.1	0	0.0179426	-4.993	-3.28758	-1.744	0.624458	-4.199	-3.1885	-2.54175	FALSE	FALSE	FALSE	FALSE	FALSE	FALSE	TRUE	FALSE	FALSE	FALSE	FALSE	FALSE	FALSE	FALSE
14	RNASE11	NP_660293.1	0	0	-4.533	-3.39271	-1.5385	0.416622	-3.857	-3.45	-2.8135	FALSE	FALSE	FALSE	FALSE	FALSE	FALSE	FALSE	FALSE	FALSE	FALSE	FALSE	FALSE	FALSE	FALSE
8	YTHDF3	NP_001264742.1	0.0389557	0.122876	-5.555	-3.86017	-1.9925	0.622236	-4.8315	-3.74	-3.1455	FALSE	FALSE	FALSE	FALSE	FALSE	FALSE	TRUE	FALSE	FALSE	FALSE	FALSE	FALSE	FALSE	FALSE
5	POLK	NP_057302.1	0	0.0376119	-5.0065	-3.65639	-0.894	0.428253	-4.2977	-3.6015	-3.202	FALSE	FALSE	FALSE	FALSE	FALSE	FALSE	FALSE	FALSE	FALSE	FALSE	FALSE	FALSE	FALSE	FALSE
5	GRAMD2B	NP_001139791.1	0	0.0809071	-5.026	-3.83513	-1.6885	0.560833	-4.586	-3.8365	-3.10215	FALSE	FALSE	FALSE	FALSE	FALSE	FALSE	FALSE	FALSE	FALSE	FALSE	FALSE	FALSE	FALSE	FALSE
12	MYF5	NP_005584.2	0	0	-4.5675	-3.38857	-2.151	0.381442	-3.9818	-3.322	-2.9732	FALSE	FALSE	FALSE	FALSE	FALSE	FALSE	FALSE	FALSE	FALSE	FALSE	TRUE	FALSE	FALSE	TRUE
16	UBN1	NP_001072982.1	0.0142154	0.0172651	-6.029	-3.40934	-1.814	0.514577	-4.02905	-3.3335	-2.858	FALSE	FALSE	FALSE	FALSE	FALSE	FALSE	FALSE	FALSE	FALSE	FALSE	FALSE	FALSE	FALSE	FALSE
8	EXOSC4	NP_061910.1	0	0	-4.238	-3.33267	-1.903	0.415253	-3.8991	-3.3225	-2.7994	FALSE	FALSE	FALSE	FALSE	FALSE	FALSE	FALSE	FALSE	FALSE	FALSE	FALSE	FALSE	FALSE	FALSE
5	ARL15	NP_061960.1	0.057303	0.11772	-5.4985	-3.87596	-2.562	0.654378	-4.8765	-3.729	-3.143	FALSE	FALSE	FALSE	FALSE	FALSE	FALSE	TRUE	FALSE	FALSE	FALSE	FALSE	FALSE	FALSE	FALSE
7	BHLHA15	NP_803238.1	0	0	-3.56	-3.19682	-2.679	0.190512	-3.4675	-3.163	-2.9646	FALSE	FALSE	FALSE	FALSE	FALSE	FALSE	FALSE	FALSE	FALSE	FALSE	FALSE	FALSE	FALSE	FALSE
20	SNAP25	NP_570824.1	0	0.169059	-4.9535	-4.26508	-3.01	0.32389	-4.71645	-4.2605	-3.843	FALSE	FALSE	FALSE	FALSE	FALSE	FALSE	FALSE	FALSE	FALSE	FALSE	TRUE	TRUE	FALSE	TRUE
9	ATP6V1G1	NP_004879.1	0	0.00093985	-4.659	-3.60836	-1.413	0.493135	-4.22445	-3.642	-2.9114	FALSE	FALSE	FALSE	FALSE	FALSE	FALSE	FALSE	FALSE	FALSE	FALSE	FALSE	FALSE	FALSE	FALSE
19	MBOAT7	NP_001139554.1	0	0	-3.843	-3.15479	-1.9745	0.324913	-3.5995	-3.1435	-2.7345	FALSE	FALSE	FALSE	FALSE	FALSE	FALSE	TRUE	FALSE	FALSE	FALSE	TRUE	FALSE	FALSE	TRUE
1	TNFRSF25	NP_683866.1	0	0.00327311	-4.7305	-3.46697	-2.3625	0.425173	-4.13565	-3.362	-3.016	FALSE	FALSE	FALSE	FALSE	FALSE	FALSE	FALSE	FALSE	FALSE	FALSE	FALSE	FALSE	FALSE	FALSE
17	FBF1	NP_001306122.1	0	0	-3.968	-3.38638	-2.5725	0.269248	-3.7485	-3.3985	-3.013	TRUE	FALSE	FALSE	FALSE	FALSE	FALSE	FALSE	FALSE	FALSE	FALSE	FALSE	FALSE	FALSE	FALSE
6	DDX43	NP_061135.2	0.00932888	0.13868	-5.2485	-3.96452	-2.076	0.563678	-4.72195	-3.961	-3.20555	FALSE	FALSE	FALSE	FALSE	FALSE	FALSE	FALSE	FALSE	FALSE	FALSE	FALSE	FALSE	FALSE	FALSE
1	MKNK1	NP_003675.3	0.0313828	0.0907159	-5.5775	-3.80088	-3.0015	0.574703	-4.698	-3.6175	-3.21485	FALSE	FALSE	FALSE	FALSE	FALSE	FALSE	FALSE	FALSE	FALSE	FALSE	FALSE	FALSE	FALSE	FALSE
1	WASF2	NP_001188333.1	0	0.100775	-4.9945	-3.89005	-2.64	0.439654	-4.61745	-3.69425	-3.47555	FALSE	FALSE	FALSE	FALSE	FALSE	FALSE	FALSE	FALSE	FALSE	FALSE	FALSE	FALSE	FALSE	FALSE
7	DYNC1I1	NP_004402.1	0.0604703	0.108967	-5.7315	-3.90046	-3.0715	0.648719	-4.8591	-3.7605	-3.172	FALSE	FALSE	FALSE	FALSE	FALSE	FALSE	TRUE	FALSE	FALSE	FALSE	FALSE	FALSE	FALSE	FALSE
11	CAPRIN1	NP_976240.1	0.00560429	0.0523067	-5.388	-3.65574	-1.951	0.53227	-4.43645	-3.55975	-3.041	FALSE	FALSE	FALSE	FALSE	FALSE	FALSE	FALSE	FALSE	FALSE	FALSE	TRUE	FALSE	FALSE	TRUE
7	ASNS	NP_597680.2	0	0	-4.2935	-3.60676	-2.281	0.352342	-4.061	-3.62675	-3.11515	FALSE	FALSE	FALSE	FALSE	FALSE	FALSE	FALSE	FALSE	FALSE	FALSE	TRUE	FALSE	FALSE	TRUE
17	HEATR6	NP_071353.4	0	0	-4.348	-3.46374	-2.2915	0.304524	-3.8675	-3.4565	-3.08155	FALSE	FALSE	FALSE	FALSE	FALSE	FALSE	FALSE	FALSE	FALSE	FALSE	FALSE	FALSE	FALSE	FALSE
19	COX6B1	NP_001854.1	0	0.000701754	-4.642	-3.52869	-2.4125	0.432721	-4.0933	-3.5645	-2.9356	FALSE	TRUE	FALSE	FALSE	FALSE	FALSE	FALSE	FALSE	FALSE	FALSE	TRUE	FALSE	FALSE	TRUE
X	NKAP	NP_078804.2	0.237722	0.0947048	-6.1805	-4.40513	-2.893	0.758263	-5.612	-4.216	-3.529	FALSE	FALSE	FALSE	FALSE	FALSE	FALSE	FALSE	FALSE	FALSE	FALSE	TRUE	FALSE	FALSE	TRUE
Y	DAZ4	NP_001375413.1	1	0	-8.592	-8.05202	-5.931	0.305176	-8.3113	-8.144	-7.6427	FALSE	FALSE	FALSE	FALSE	FALSE	FALSE	FALSE	TRUE	TRUE	FALSE	FALSE	FALSE	FALSE	FALSE
22	ATXN10	NP_001161093.1	0	0.00385433	-4.8755	-3.4071	-2.193	0.335523	-3.83085	-3.3685	-3.03715	TRUE	FALSE	FALSE	FALSE	FALSE	FALSE	FALSE	FALSE	FALSE	FALSE	FALSE	FALSE	FALSE	FALSE
9	GLT6D1	NP_892019.2	0	0	-3.868	-3.39337	-1.9195	0.307379	-3.7372	-3.4515	-2.9633	FALSE	FALSE	FALSE	FALSE	FALSE	FALSE	TRUE	FALSE	FALSE	FALSE	FALSE	FALSE	FALSE	FALSE
1	CAPZA1	NP_006126.1	0.0751335	0.118421	-6.181	-3.9194	-2.161	0.750882	-4.939	-3.91	-2.935	FALSE	FALSE	FALSE	FALSE	FALSE	FALSE	TRUE	FALSE	FALSE	FALSE	FALSE	FALSE	FALSE	FALSE
X	RLIM	NP_899196.1	0.262541	0.150577	-6.8875	-4.48056	-2.0665	0.857702	-5.661	-4.397	-3.4226	FALSE	FALSE	FALSE	FALSE	FALSE	FALSE	FALSE	FALSE	FALSE	FALSE	TRUE	FALSE	FALSE	TRUE
5	MAN2A1	NP_002363.2	0	0.0152748	-4.9415	-3.55976	-2.3695	0.458351	-4.2405	-3.482	-3.0209	FALSE	FALSE	FALSE	FALSE	FALSE	FALSE	TRUE	FALSE	FALSE	FALSE	FALSE	FALSE	FALSE	FALSE
15	POTEB2	NP_001264232.1	0.975279	0.0207337	-6.9335	-5.85937	-3.644	0.391941	-6.3535	-5.85425	-5.3755	FALSE	FALSE	FALSE	FALSE	FALSE	FALSE	FALSE	TRUE	TRUE	FALSE	FALSE	FALSE	FALSE	FALSE
5	TCOF1	NP_001128715.1	0	0.0275462	-5.033	-3.55436	-2.0105	0.444381	-4.2337	-3.4275	-3.0955	TRUE	FALSE	TRUE	FALSE	FALSE	FALSE	FALSE	FALSE	FALSE	FALSE	TRUE	FALSE	FALSE	TRUE
9	MELK	NP_055606.1	0	0.00401768	-4.731	-3.61485	-2.792	0.411609	-4.2515	-3.5305	-3.1425	FALSE	FALSE	FALSE	FALSE	FALSE	FALSE	FALSE	FALSE	FALSE	FALSE	FALSE	FALSE	FALSE	FALSE
14	SYNJ2BP	NP_060843.2	0	0.0387812	-4.8285	-3.84652	-2.522	0.462676	-4.4655	-3.8415	-3.2134	FALSE	FALSE	FALSE	FALSE	FALSE	FALSE	FALSE	FALSE	FALSE	FALSE	FALSE	FALSE	FALSE	FALSE
19	KPTN	NP_008990.2	0	0.0366472	-5	-3.61564	-1.686	0.583934	-4.3925	-3.631	-2.8208	FALSE	FALSE	FALSE	FALSE	FALSE	FALSE	FALSE	FALSE	FALSE	FALSE	TRUE	FALSE	FALSE	TRUE
12	BORCS5	NP_477517.1	0	0	-3.9245	-3.36906	-2.654	0.259454	-3.71855	-3.372	-3.02395	FALSE	FALSE	FALSE	FALSE	FALSE	FALSE	TRUE	FALSE	FALSE	FALSE	FALSE	FALSE	FALSE	FALSE
13	EPSTI1	NP_001317472.1	0	0	-4.301	-3.54438	-2.0755	0.297685	-3.8973	-3.578	-3.1335	FALSE	FALSE	FALSE	FALSE	FALSE	FALSE	FALSE	FALSE	FALSE	FALSE	FALSE	FALSE	FALSE	FALSE
10	DUSP13	NP_001350443.1	0.00186858	0.0454687	-5.159	-3.55951	-2.7805	0.539036	-4.406	-3.386	-2.9895	FALSE	FALSE	FALSE	FALSE	FALSE	FALSE	FALSE	FALSE	FALSE	FALSE	FALSE	FALSE	FALSE	FALSE
6	TSBP1	NP_001273403.1	0.00678138	0.0716599	-5.459	-3.84444	-1.8255	0.457384	-4.5245	-3.7425	-3.38595	FALSE	FALSE	FALSE	FALSE	FALSE	FALSE	FALSE	FALSE	FALSE	FALSE	FALSE	FALSE	FALSE	FALSE
20	FAM210B	NP_543011.2	0	0.00503432	-4.678	-3.78372	-1.7475	0.511651	-4.387	-3.8405	-3.0574	FALSE	FALSE	FALSE	FALSE	FALSE	FALSE	FALSE	FALSE	FALSE	FALSE	FALSE	FALSE	FALSE	FALSE
16	BANP	NP_001167014.1	0.0459269	0.0811264	-5.8075	-3.79954	-2.4015	0.608498	-4.7366	-3.6355	-3.15	FALSE	FALSE	FALSE	FALSE	FALSE	FALSE	FALSE	FALSE	FALSE	FALSE	FALSE	FALSE	FALSE	FALSE
19	B3GNT8	NP_940942.1	0	0	-3.944	-3.30535	-2.4145	0.26408	-3.6683	-3.2925	-2.9675	FALSE	FALSE	FALSE	FALSE	FALSE	FALSE	FALSE	FALSE	FALSE	FALSE	FALSE	FALSE	FALSE	FALSE
6	OR14J1	NP_112208.1	0.00257998	0.0596835	-5.295	-3.60354	-1.8005	0.626585	-4.46435	-3.5865	-2.8095	FALSE	FALSE	FALSE	FALSE	FALSE	FALSE	FALSE	FALSE	FALSE	FALSE	FALSE	FALSE	FALSE	FALSE
10	TIMM23	NP_006318.1	0	0	-4.548	-3.83789	-1.5505	0.415223	-4.302	-3.9235	-3.2641	FALSE	FALSE	FALSE	FALSE	FALSE	FALSE	TRUE	FALSE	FALSE	FALSE	FALSE	FALSE	FALSE	FALSE
15	GOLGA6L4	NP_001254465.2	0.192606	0.031805	-6.346	-4.39091	-1.0725	0.78372	-5.89935	-4.1415	-3.7565	FALSE	FALSE	FALSE	FALSE	FALSE	FALSE	FALSE	TRUE	FALSE	FALSE	FALSE	FALSE	FALSE	FALSE
7	ING3	NP_061944.2	0.109713	0.186372	-5.5835	-4.17792	-2.3115	0.633247	-5.08225	-4.07175	-3.4135	FALSE	FALSE	FALSE	FALSE	FALSE	FALSE	TRUE	FALSE	FALSE	FALSE	FALSE	FALSE	FALSE	FALSE
12	CLEC9A	NP_997228.1	0.0172859	0.0652735	-5.474	-3.6968	-1.814	0.580329	-4.5385	-3.62725	-3.018	FALSE	FALSE	FALSE	FALSE	FALSE	FALSE	FALSE	FALSE	FALSE	FALSE	FALSE	FALSE	FALSE	FALSE
X	SLC9A6	NP_006350.1	0.464508	0.147136	-7.308	-4.95987	-2.871	0.970324	-6.2895	-4.95	-3.639	FALSE	FALSE	TRUE	FALSE	FALSE	FALSE	FALSE	FALSE	FALSE	FALSE	TRUE	FALSE	FALSE	TRUE
2	DNAJC27	NP_057628.1	0	0.000584795	-4.6255	-3.40117	-1.9305	0.534256	-4.11505	-3.39525	-2.686	FALSE	FALSE	FALSE	FALSE	FALSE	FALSE	TRUE	FALSE	FALSE	FALSE	FALSE	FALSE	FALSE	FALSE
4	CCDC110	NP_689988.1	0	0	-4.462	-3.58337	-1.288	0.349291	-4.0285	-3.59325	-3.14	FALSE	FALSE	FALSE	FALSE	FALSE	FALSE	FALSE	FALSE	FALSE	FALSE	FALSE	FALSE	FALSE	FALSE
13	SERPINE3	NP_001094790.1	0	0.016129	-4.8595	-3.68775	-2.6865	0.439116	-4.314	-3.657	-3.1275	FALSE	FALSE	FALSE	FALSE	FALSE	FALSE	FALSE	FALSE	FALSE	FALSE	FALSE	FALSE	FALSE	FALSE
10	LRRC18	NP_001006940.3	0	0	-4.1055	-3.27309	-2.1075	0.36389	-3.76595	-3.265	-2.7915	FALSE	FALSE	FALSE	FALSE	FALSE	FALSE	FALSE	FALSE	FALSE	FALSE	FALSE	FALSE	FALSE	FALSE
1	TLCD4	NP_001186608.1	0	0.0221607	-4.801	-3.88401	-2.5225	0.40577	-4.4134	-3.9	-3.3365	FALSE	FALSE	FALSE	FALSE	FALSE	FALSE	FALSE	FALSE	FALSE	FALSE	FALSE	FALSE	FALSE	FALSE
15	TMCO5A	NP_689666.2	0	0	-4.1195	-3.57223	-2.1245	0.295238	-3.929	-3.606	-3.1755	FALSE	FALSE	FALSE	FALSE	FALSE	FALSE	TRUE	FALSE	FALSE	FALSE	FALSE	FALSE	FALSE	FALSE
19	CABP5	NP_062829.1	0	0.00108147	-4.665	-3.605	-2.4815	0.428975	-4.1975	-3.59925	-3.03685	FALSE	FALSE	FALSE	FALSE	FALSE	FALSE	FALSE	FALSE	FALSE	FALSE	FALSE	FALSE	FALSE	FALSE
15	COPS2	NP_001137359.1	0.471894	0.110992	-7.378	-5.01371	-3.171	1.15222	-6.6631	-4.938	-3.4933	FALSE	FALSE	FALSE	FALSE	FALSE	FALSE	TRUE	FALSE	FALSE	FALSE	FALSE	FALSE	FALSE	FALSE
1	FCGR2B	NP_003992.3	0	0.0255183	-4.7945	-3.91973	-2.5055	0.38687	-4.44835	-3.90825	-3.4237	FALSE	FALSE	FALSE	FALSE	FALSE	FALSE	TRUE	FALSE	FALSE	FALSE	FALSE	FALSE	FALSE	FALSE
14	ARMH4	NP_001001872.2	0	0	-3.9675	-3.43783	-2.627	0.27363	-3.794	-3.482	-3.0206	FALSE	FALSE	FALSE	FALSE	FALSE	FALSE	TRUE	FALSE	FALSE	FALSE	FALSE	FALSE	FALSE	FALSE
3	TMPRSS7	NP_001036040.2	0	0	-3.847	-3.42583	-0.934	0.23309	-3.6945	-3.4575	-3.1085	FALSE	FALSE	FALSE	TRUE	FALSE	FALSE	FALSE	FALSE	FALSE	FALSE	FALSE	FALSE	FALSE	FALSE
15	CAPN3	NP_000061.1	0.0182026	0.0429582	-5.6125	-3.46055	-2.3825	0.562192	-4.34785	-3.2365	-2.96715	FALSE	TRUE	FALSE	FALSE	FALSE	FALSE	TRUE	FALSE	FALSE	FALSE	FALSE	FALSE	FALSE	FALSE
6	TMEM14C	NP_001158730.1	0	0	-3.961	-3.47108	-2.4915	0.275375	-3.8165	-3.493	-3.091	FALSE	FALSE	FALSE	FALSE	FALSE	FALSE	FALSE	FALSE	FALSE	FALSE	FALSE	FALSE	FALSE	FALSE
6	C6orf62	NP_112201.1	0	0	-4.188	-3.77087	-2.3765	0.271528	-4.0495	-3.839	-3.3786	FALSE	FALSE	FALSE	FALSE	FALSE	FALSE	FALSE	FALSE	FALSE	FALSE	FALSE	FALSE	FALSE	FALSE
1	DFFA	NP_004392.1	0	0	-4.465	-3.53132	-2.352	0.317147	-3.942	-3.515	-3.1528	FALSE	FALSE	FALSE	FALSE	FALSE	FALSE	FALSE	FALSE	FALSE	FALSE	FALSE	FALSE	FALSE	FALSE
20	ZBP1	NP_110403.2	0	0	-4.398	-3.35504	-2.2155	0.31997	-3.7481	-3.3575	-2.9655	FALSE	FALSE	FALSE	FALSE	FALSE	FALSE	FALSE	FALSE	FALSE	FALSE	FALSE	FALSE	FALSE	FALSE
6	SFTA2	NP_995326.1	0	0	-3.8295	-3.60644	-2.5035	0.172274	-3.7589	-3.6575	-3.3357	FALSE	FALSE	FALSE	FALSE	FALSE	FALSE	TRUE	FALSE	FALSE	FALSE	FALSE	FALSE	FALSE	FALSE
X	ERCC6L	NP_060139.2	0.208644	0.138448	-6.076	-4.45293	-2.783	0.660148	-5.507	-4.3245	-3.6945	FALSE	FALSE	FALSE	FALSE	FALSE	FALSE	FALSE	FALSE	FALSE	FALSE	FALSE	FALSE	FALSE	FALSE
16	CBFB	NP_074036.1	0	0	-3.992	-3.78262	-2.9705	0.172847	-3.96	-3.834	-3.54095	FALSE	FALSE	FALSE	FALSE	FALSE	FALSE	TRUE	FALSE	FALSE	FALSE	FALSE	FALSE	FALSE	FALSE
11	MRPL21	NP_852615.1	0	0.0082846	-4.8455	-3.57502	-2.5225	0.446136	-4.1799	-3.55275	-3.004	FALSE	FALSE	FALSE	FALSE	FALSE	FALSE	FALSE	FALSE	FALSE	FALSE	FALSE	FALSE	FALSE	FALSE
7	ATP6V1FNB	NP_001182079.1	0	0	-3.6335	-3.14804	-2.3505	0.206083	-3.413	-3.1615	-2.878	FALSE	FALSE	FALSE	FALSE	FALSE	FALSE	FALSE	FALSE	FALSE	FALSE	FALSE	FALSE	FALSE	FALSE
6	TMEM14B	NP_112231.3	0	0	-4.6165	-3.59484	-1.4105	0.525239	-4.27655	-3.6065	-2.918	FALSE	FALSE	FALSE	FALSE	FALSE	FALSE	FALSE	FALSE	FALSE	FALSE	FALSE	FALSE	FALSE	FALSE
11	PTS	NP_000308.1	0	0	-4.1815	-3.48495	-2.4555	0.311762	-3.8841	-3.50425	-3.05685	FALSE	TRUE	FALSE	FALSE	FALSE	FALSE	FALSE	FALSE	FALSE	FALSE	TRUE	FALSE	FALSE	TRUE
11	PGM2L1	NP_775853.2	0	0.0331727	-4.8935	-3.80642	-2.662	0.444779	-4.438	-3.768	-3.24405	FALSE	FALSE	FALSE	FALSE	FALSE	FALSE	FALSE	FALSE	FALSE	FALSE	TRUE	FALSE	FALSE	TRUE
5	SETD9	NP_714917.2	0	0	-3.9545	-3.5409	-2.473	0.268425	-3.8595	-3.5625	-3.1582	FALSE	FALSE	FALSE	FALSE	FALSE	FALSE	TRUE	FALSE	FALSE	FALSE	FALSE	FALSE	FALSE	FALSE
2	SNORC	NP_001333049.2	0	0	-3.81	-3.13524	-2.2405	0.300476	-3.5855	-3.103	-2.7637	FALSE	FALSE	FALSE	FALSE	FALSE	FALSE	TRUE	FALSE	FALSE	FALSE	FALSE	FALSE	FALSE	FALSE
5	CDX1	NP_001795.2	0	0	-3.6755	-3.17914	-2.2145	0.253442	-3.544	-3.1505	-2.869	FALSE	FALSE	FALSE	FALSE	FALSE	FALSE	FALSE	FALSE	FALSE	FALSE	FALSE	FALSE	FALSE	FALSE
X	AMMECR1	NP_056180.1	0.224419	0.211862	-6.102	-4.46441	-2.592	0.701269	-5.4099	-4.4845	-3.5078	FALSE	FALSE	FALSE	FALSE	FALSE	FALSE	FALSE	FALSE	FALSE	FALSE	FALSE	FALSE	FALSE	TRUE
6	ABT1	NP_037507.1	0	0.00806069	-4.975	-3.20844	-1.8165	0.545805	-3.98545	-3.1155	-2.579	FALSE	FALSE	FALSE	FALSE	FALSE	FALSE	TRUE	FALSE	FALSE	FALSE	FALSE	FALSE	FALSE	FALSE
20	HRH3	NP_009163.2	0.0026738	0.075007	-5.209	-3.74364	-2.4805	0.574586	-4.56325	-3.68675	-3.0265	FALSE	FALSE	FALSE	FALSE	FALSE	FALSE	FALSE	FALSE	FALSE	FALSE	FALSE	FALSE	FALSE	FALSE
2	MTHFD2	NP_006627.2	0	0.0253826	-4.8875	-3.72976	-2.132	0.527318	-4.4195	-3.744	-3.003	FALSE	FALSE	FALSE	FALSE	FALSE	FALSE	FALSE	FALSE	FALSE	FALSE	FALSE	FALSE	FALSE	FALSE
6	H2BC3	NP_066406.1	0.203139	0.104801	-6.4755	-3.7652	-1.001	1.29831	-5.48975	-3.79225	-1.9555	FALSE	FALSE	FALSE	FALSE	FALSE	FALSE	FALSE	FALSE	FALSE	FALSE	FALSE	FALSE	FALSE	FALSE
10	DPYSL4	NP_006417.2	0.0584526	0.0968955	-5.4145	-3.61393	-1.5295	0.799944	-4.8455	-3.43075	-2.739	FALSE	FALSE	FALSE	FALSE	FALSE	FALSE	FALSE	FALSE	FALSE	FALSE	FALSE	FALSE	FALSE	FALSE
19	IL11	NP_000632.1	0	0.00111982	-4.7205	-3.1029	-2.366	0.348225	-3.57285	-3.01475	-2.743	FALSE	FALSE	FALSE	FALSE	FALSE	FALSE	FALSE	FALSE	FALSE	FALSE	TRUE	FALSE	FALSE	TRUE
1	OR14C36	NP_001001918.1	0.000517688	0.0308887	-5.1465	-3.42873	-1.093	0.691518	-4.3718	-3.443	-2.5177	FALSE	FALSE	FALSE	FALSE	FALSE	FALSE	TRUE	FALSE	FALSE	FALSE	FALSE	FALSE	FALSE	FALSE
1	TATDN3	NP_001139641.1	0	0.00122971	-4.838	-3.57743	-3.027	0.247344	-3.93475	-3.48075	-3.3725	FALSE	FALSE	FALSE	FALSE	FALSE	FALSE	FALSE	FALSE	FALSE	FALSE	FALSE	FALSE	FALSE	FALSE
9	PSMD5	NP_005038.1	0	0	-4.4965	-3.5576	-2.4645	0.417762	-4.146	-3.546	-2.9995	FALSE	FALSE	FALSE	FALSE	FALSE	FALSE	FALSE	FALSE	FALSE	FALSE	FALSE	FALSE	FALSE	FALSE
19	ZNF607	NP_116078.4	0.0662618	0.0588394	-5.997	-3.70803	-1.9625	0.691206	-4.7911	-3.46575	-3.082	FALSE	FALSE	FALSE	FALSE	FALSE	FALSE	FALSE	FALSE	FALSE	FALSE	FALSE	FALSE	FALSE	FALSE
20	PXMP4	NP_009169.3	0	0	-4.328	-3.59743	-2.247	0.343789	-4.02195	-3.629	-3.1197	FALSE	FALSE	FALSE	FALSE	FALSE	FALSE	TRUE	FALSE	FALSE	FALSE	FALSE	FALSE	FALSE	FALSE
19	NLRP8	NP_789781.2	0	0.000307787	-4.6495	-3.43313	-1.7505	0.450903	-4.089	-3.381	-2.8895	FALSE	FALSE	FALSE	FALSE	FALSE	FALSE	FALSE	FALSE	FALSE	FALSE	FALSE	FALSE	FALSE	FALSE
12	AKAP3	NP_006413.4	6.41849e-05	0.00898588	-5.126	-3.48136	-2.225	0.373195	-3.9955	-3.41475	-3.0725	FALSE	FALSE	FALSE	TRUE	FALSE	FALSE	FALSE	FALSE	FALSE	FALSE	FALSE	FALSE	FALSE	FALSE
12	OLR1	NP_002534.1	0	0.0646285	-4.994	-3.67766	-1.829	0.564245	-4.51785	-3.621	-2.99995	FALSE	FALSE	FALSE	FALSE	FALSE	FALSE	FALSE	FALSE	FALSE	FALSE	FALSE	FALSE	FALSE	FALSE
7	MKLN1	NP_037387.2	0.175831	0.145104	-6.556	-4.17655	-1.864	0.843652	-5.35	-4.1145	-3.0805	FALSE	FALSE	FALSE	FALSE	FALSE	FALSE	TRUE	FALSE	FALSE	FALSE	FALSE	FALSE	FALSE	FALSE
2	KYNU	NP_003928.1	0	0	-4.3055	-3.44817	-2.074	0.37405	-3.9215	-3.474	-2.94135	FALSE	FALSE	FALSE	FALSE	FALSE	FALSE	TRUE	FALSE	FALSE	FALSE	FALSE	FALSE	FALSE	FALSE
5	BRD8	NP_001287891.1	0.0777757	0.124517	-5.7905	-3.97881	-1.897	0.672665	-4.9635	-3.869	-3.181	FALSE	FALSE	FALSE	FALSE	FALSE	FALSE	FALSE	FALSE	FALSE	FALSE	FALSE	FALSE	FALSE	FALSE
X	DCAF12L2	NP_001013650.1	0	0.0781609	-4.9115	-3.91156	-1.6485	0.508979	-4.5691	-3.939	-3.2265	FALSE	FALSE	FALSE	FALSE	FALSE	FALSE	FALSE	FALSE	FALSE	FALSE	FALSE	FALSE	FALSE	FALSE
5	ZDHHC11	NP_079062.1	0	0	-4.529	-3.51989	-2.231	0.488765	-4.1925	-3.4835	-2.9022	FALSE	FALSE	FALSE	FALSE	FALSE	FALSE	FALSE	FALSE	FALSE	FALSE	FALSE	FALSE	FALSE	FALSE
14	OR5AU1	NP_001004731.2	0	0.0174299	-4.961	-3.32221	-2.0415	0.600285	-4.2054	-3.25	-2.5766	FALSE	FALSE	FALSE	FALSE	FALSE	FALSE	FALSE	FALSE	FALSE	FALSE	FALSE	FALSE	FALSE	FALSE
2	KHK	NP_000212.1	0.000567967	0.0187429	-5.2065	-3.33766	-1.851	0.576078	-4.1495	-3.269	-2.6376	FALSE	TRUE	FALSE	FALSE	FALSE	FALSE	FALSE	FALSE	FALSE	FALSE	FALSE	FALSE	FALSE	FALSE
15	ASB7	NP_937886.1	0	0.13286	-4.9275	-4.13027	-2.7255	0.368244	-4.6644	-4.084	-3.693	FALSE	FALSE	FALSE	FALSE	FALSE	FALSE	TRUE	FALSE	FALSE	FALSE	FALSE	FALSE	FALSE	FALSE
16	COQ7	NP_057222.2	0	0	-3.9165	-3.23805	-2.119	0.322123	-3.6236	-3.2915	-2.765	FALSE	FALSE	FALSE	FALSE	FALSE	FALSE	FALSE	FALSE	FALSE	FALSE	FALSE	FALSE	FALSE	FALSE
5	SLC36A1	NP_510968.2	0	0.0460058	-4.9535	-3.60497	-2.4325	0.600222	-4.451	-3.559	-2.8404	FALSE	FALSE	FALSE	FALSE	FALSE	FALSE	TRUE	FALSE	FALSE	FALSE	FALSE	FALSE	FALSE	FALSE
21	SLX9	NP_001303913.1	0	0	-3.922	-3.15222	-2.159	0.311754	-3.5851	-3.1395	-2.7589	FALSE	FALSE	FALSE	FALSE	FALSE	FALSE	FALSE	FALSE	FALSE	FALSE	FALSE	FALSE	FALSE	FALSE
3	CYB561D2	NP_001278213.1	0	0	-4.461	-3.42873	-1.666	0.400345	-3.9574	-3.429	-2.9101	FALSE	FALSE	FALSE	FALSE	FALSE	FALSE	TRUE	FALSE	FALSE	FALSE	FALSE	FALSE	FALSE	FALSE
16	XPO6	NP_055986.1	0.0375602	0.111878	-5.586	-4.00202	-1.998	0.53592	-4.7915	-3.9525	-3.3405	FALSE	FALSE	FALSE	FALSE	FALSE	FALSE	FALSE	FALSE	FALSE	FALSE	FALSE	FALSE	FALSE	FALSE
19	PPP1R15A	NP_055145.3	0.00165837	0.00207297	-5.361	-3.27618	-2.0675	0.31169	-3.598	-3.271	-2.91715	FALSE	FALSE	FALSE	FALSE	FALSE	FALSE	TRUE	FALSE	FALSE	FALSE	FALSE	FALSE	FALSE	FALSE
1	SLC50A1	NP_061333.2	0	0.0185464	-4.8345	-3.77215	-2.28	0.456306	-4.377	-3.76525	-3.1788	FALSE	TRUE	FALSE	FALSE	FALSE	FALSE	FALSE	FALSE	FALSE	FALSE	FALSE	FALSE	FALSE	FALSE
19	NDUFA3	NP_004533.1	0	0	-4.362	-3.24369	-2.6265	0.246332	-3.5907	-3.18925	-2.991	FALSE	FALSE	FALSE	FALSE	FALSE	FALSE	FALSE	FALSE	FALSE	FALSE	FALSE	FALSE	FALSE	FALSE
15	C15orf61	NP_001137408.1	0	0	-3.515	-3.02117	-2.373	0.164448	-3.2395	-3.01475	-2.822	FALSE	FALSE	FALSE	FALSE	FALSE	FALSE	FALSE	FALSE	FALSE	FALSE	FALSE	FALSE	FALSE	FALSE
20	PFDN4	NP_002614.2	0.032	0.152842	-5.218	-4.0207	-2.397	0.594502	-4.8213	-4.0165	-3.2262	FALSE	FALSE	FALSE	FALSE	FALSE	FALSE	TRUE	FALSE	FALSE	FALSE	FALSE	FALSE	FALSE	FALSE
6	ADGRF5	NP_056049.4	0	0.0136383	-4.892	-3.57558	-1.525	0.488098	-4.3065	-3.513	-3.006	FALSE	FALSE	FALSE	FALSE	FALSE	FALSE	TRUE	FALSE	FALSE	FALSE	FALSE	FALSE	FALSE	FALSE
14	C14orf119	NP_060394.1	0	0	-3.9635	-3.37232	-2.3325	0.246322	-3.73055	-3.36225	-3.07	FALSE	FALSE	FALSE	FALSE	FALSE	FALSE	FALSE	FALSE	FALSE	FALSE	FALSE	FALSE	FALSE	FALSE
16	TFAP4	NP_003214.1	0.0132474	0.112782	-5.349	-3.79934	-2.3145	0.600595	-4.68775	-3.696	-3.09225	FALSE	FALSE	FALSE	FALSE	FALSE	FALSE	TRUE	FALSE	FALSE	FALSE	FALSE	FALSE	FALSE	FALSE
13	NDFIP2	NP_061953.2	0.00462963	0.0950292	-5.265	-3.76896	-2.169	0.653094	-4.61535	-3.8255	-2.858	FALSE	FALSE	FALSE	FALSE	FALSE	FALSE	FALSE	FALSE	FALSE	FALSE	FALSE	FALSE	FALSE	FALSE
2	PDK1	NP_001265478.1	0.000149098	0.028925	-5.1055	-3.61773	-2.5145	0.533446	-4.3405	-3.5975	-2.9125	FALSE	FALSE	FALSE	FALSE	FALSE	FALSE	FALSE	FALSE	FALSE	FALSE	FALSE	FALSE	FALSE	FALSE
8	PMP2	NP_002668.1	0.0191758	0.0750714	-5.4235	-3.70199	-1.791	0.677815	-4.5885	-3.701	-2.825	FALSE	FALSE	FALSE	FALSE	FALSE	FALSE	FALSE	FALSE	FALSE	FALSE	FALSE	FALSE	FALSE	FALSE
17	GCGR	NP_000151.1	0.0189001	0.0828193	-5.457	-3.64008	-2.1305	0.704366	-4.6211	-3.5915	-2.727	FALSE	FALSE	FALSE	FALSE	FALSE	FALSE	FALSE	FALSE	FALSE	FALSE	FALSE	FALSE	FALSE	FALSE
4	PIGY	NP_001036081.1	0	0.0111643	-4.8325	-3.59692	-2.0165	0.484794	-4.2584	-3.5885	-3.01195	FALSE	FALSE	FALSE	FALSE	FALSE	FALSE	FALSE	FALSE	FALSE	FALSE	TRUE	FALSE	FALSE	TRUE
3	FBLN2	NP_001004019.1	0	0	-4.0155	-3.20998	-2.0515	0.259108	-3.549	-3.2045	-2.903	FALSE	FALSE	FALSE	FALSE	FALSE	FALSE	TRUE	FALSE	FALSE	FALSE	FALSE	FALSE	FALSE	FALSE
12	YARS2	NP_001035526.1	0	0	-4.4625	-3.50316	-2.863	0.309795	-3.9485	-3.4575	-3.1335	FALSE	TRUE	FALSE	FALSE	FALSE	FALSE	FALSE	FALSE	FALSE	FALSE	TRUE	FALSE	FALSE	TRUE
3	HMCES	NP_001006109.1	0	0.00117481	-4.692	-3.63938	-2.348	0.413966	-4.2125	-3.627	-3.10125	FALSE	FALSE	FALSE	FALSE	FALSE	FALSE	FALSE	FALSE	FALSE	FALSE	FALSE	FALSE	FALSE	FALSE
5	CD180	NP_005573.2	0	0	-4.3795	-3.40838	-1.29	0.432263	-4.01525	-3.3885	-2.886	FALSE	FALSE	FALSE	TRUE	FALSE	FALSE	TRUE	FALSE	FALSE	FALSE	FALSE	FALSE	FALSE	FALSE
5	MARCHF6	NP_005876.2	0.372547	0.0934166	-7.35	-4.58973	-2.1505	1.27177	-6.448	-4.455	-3.0205	FALSE	FALSE	FALSE	FALSE	FALSE	FALSE	FALSE	FALSE	FALSE	FALSE	FALSE	FALSE	FALSE	FALSE
18	CCDC178	NP_001295055.1	0	0	-4.1405	-3.54055	-1.8115	0.338247	-3.9955	-3.527	-3.0926	FALSE	FALSE	FALSE	FALSE	FALSE	FALSE	FALSE	FALSE	FALSE	FALSE	FALSE	FALSE	FALSE	FALSE
7	GATAD1	NP_066990.3	0	0	-4.6015	-3.59428	-2.396	0.381681	-4.10775	-3.5985	-3.08885	FALSE	FALSE	FALSE	FALSE	FALSE	FALSE	TRUE	FALSE	FALSE	FALSE	FALSE	FALSE	FALSE	FALSE
11	OR10G8	NP_001004464.1	0.0218144	0.0756579	-5.4935	-3.44457	0.3205	0.835263	-4.606	-3.40075	-2.40625	FALSE	FALSE	FALSE	FALSE	FALSE	FALSE	FALSE	FALSE	FALSE	FALSE	FALSE	FALSE	FALSE	FALSE
1	WDTC1	NP_001263181.1	0.0522172	0.13162	-5.549	-4.03667	-2.955	0.555308	-4.8811	-3.918	-3.3925	FALSE	FALSE	FALSE	FALSE	FALSE	FALSE	FALSE	FALSE	FALSE	FALSE	FALSE	FALSE	FALSE	FALSE
6	BTNL2	NP_001291490.1	0	0	-4.6095	-3.65898	-1.1685	0.451557	-4.23245	-3.68075	-3.0895	FALSE	FALSE	FALSE	TRUE	FALSE	FALSE	TRUE	FALSE	FALSE	FALSE	FALSE	FALSE	FALSE	FALSE
12	NCKAP1L	NP_005328.2	0	0	-4.424	-3.70834	-2.4845	0.238686	-3.995	-3.726	-3.4026	FALSE	FALSE	FALSE	FALSE	FALSE	FALSE	FALSE	FALSE	FALSE	FALSE	FALSE	FALSE	FALSE	FALSE
16	TXNDC11	NP_001290376.1	0.000121974	0.0161005	-5.0775	-3.36894	-1.992	0.524052	-4.1572	-3.2525	-2.7835	FALSE	FALSE	FALSE	FALSE	FALSE	FALSE	TRUE	FALSE	FALSE	FALSE	FALSE	FALSE	FALSE	FALSE
12	LHX5	NP_071758.1	0.208765	0.108198	-6.2245	-4.09669	-2.079	0.949813	-5.5135	-3.9155	-2.9875	FALSE	FALSE	FALSE	FALSE	FALSE	FALSE	FALSE	FALSE	FALSE	FALSE	FALSE	FALSE	FALSE	FALSE
4	MTNR1A	NP_005949.1	0	0.00122807	-4.6995	-3.4589	-2.4985	0.469411	-4.13605	-3.41725	-2.86535	FALSE	FALSE	FALSE	FALSE	FALSE	FALSE	FALSE	FALSE	FALSE	FALSE	FALSE	FALSE	FALSE	FALSE
X	ZNF185	NP_001171577.1	0	0	-4.5085	-3.65946	-2.357	0.287441	-4.01085	-3.655	-3.3085	FALSE	FALSE	FALSE	FALSE	FALSE	FALSE	FALSE	FALSE	FALSE	FALSE	FALSE	FALSE	FALSE	FALSE
4	DKK2	NP_055236.1	0	0.000284495	-4.617	-3.42853	-2.016	0.46005	-4.0915	-3.367	-2.8847	FALSE	FALSE	FALSE	FALSE	FALSE	FALSE	TRUE	FALSE	FALSE	FALSE	FALSE	FALSE	FALSE	FALSE
9	OR13C9	NP_001001956.1	0	0.0166205	-4.869	-3.45941	-1.3935	0.589115	-4.26125	-3.456	-2.68075	FALSE	FALSE	FALSE	FALSE	FALSE	FALSE	FALSE	FALSE	FALSE	FALSE	FALSE	FALSE	FALSE	FALSE
12	IRAG2	NP_001381732.1	0	0	-4.558	-3.88019	-2.854	0.304172	-4.231	-3.946	-3.4015	FALSE	FALSE	FALSE	FALSE	FALSE	FALSE	FALSE	FALSE	FALSE	FALSE	FALSE	FALSE	FALSE	FALSE
19	CEACAM7	NP_008821.2	0.00704691	0.0259855	-5.524	-3.47929	-1.3475	0.552322	-4.216	-3.427	-2.835	FALSE	FALSE	FALSE	FALSE	FALSE	FALSE	FALSE	FALSE	FALSE	FALSE	FALSE	FALSE	FALSE	FALSE
5	CDC20B	NP_001163873.1	0	0	-3.9215	-3.45905	-1.9795	0.242515	-3.768	-3.467	-3.1495	FALSE	FALSE	FALSE	FALSE	FALSE	FALSE	FALSE	FALSE	FALSE	FALSE	FALSE	FALSE	FALSE	FALSE
8	MROH6	NP_001094348.1	0	0.00015758	-4.6295	-3.09976	-1.55	0.421142	-3.701	-3.02525	-2.58005	FALSE	FALSE	FALSE	FALSE	FALSE	FALSE	FALSE	FALSE	FALSE	FALSE	FALSE	FALSE	FALSE	FALSE
21	SAMSN1	NP_001243299.1	0	0.028284	-4.727	-3.44152	-1.809	0.52537	-4.3239	-3.2375	-2.9268	FALSE	FALSE	FALSE	FALSE	FALSE	FALSE	FALSE	FALSE	FALSE	FALSE	FALSE	FALSE	FALSE	FALSE
2	GEMIN6	NP_079051.9	0	0	-4.161	-3.19951	-2.1865	0.339203	-3.6423	-3.183	-2.7734	FALSE	FALSE	FALSE	FALSE	FALSE	FALSE	FALSE	FALSE	FALSE	FALSE	FALSE	FALSE	FALSE	FALSE
10	ARL5B	NP_848930.1	0.0630981	0.136663	-5.67	-3.8994	-1.756	0.753498	-4.91235	-3.87625	-2.9163	FALSE	FALSE	FALSE	FALSE	FALSE	FALSE	FALSE	FALSE	FALSE	FALSE	FALSE	FALSE	FALSE	FALSE
3	CFAP44	NP_001157968.1	0	0.000332346	-4.7425	-3.5375	-2.2225	0.293218	-3.894	-3.532	-3.18	FALSE	FALSE	FALSE	FALSE	FALSE	FALSE	FALSE	FALSE	FALSE	FALSE	FALSE	FALSE	FALSE	FALSE
12	LRRIQ1	NP_001073379.1	0	0	-4.211	-3.41068	-2.271	0.222378	-3.6623	-3.421	-3.1385	FALSE	FALSE	FALSE	FALSE	FALSE	FALSE	TRUE	FALSE	FALSE	FALSE	FALSE	FALSE	FALSE	FALSE
19	PNPLA6	NP_006693.3	0	0	-4.397	-3.70098	-2.1645	0.380023	-4.185	-3.734	-3.1765	FALSE	TRUE	FALSE	FALSE	FALSE	FALSE	FALSE	FALSE	FALSE	FALSE	TRUE	FALSE	FALSE	TRUE
14	SAMD4A	NP_056404.4	0.0113534	0.0417293	-5.458	-3.4493	-1.2515	0.573734	-4.3102	-3.3025	-2.8545	FALSE	FALSE	FALSE	FALSE	FALSE	FALSE	TRUE	FALSE	FALSE	FALSE	FALSE	FALSE	FALSE	FALSE
17	WFIKKN2	NP_783165.1	0	0	-4.34	-3.37573	-1.968	0.399528	-3.92255	-3.3635	-2.862	FALSE	FALSE	FALSE	FALSE	FALSE	FALSE	TRUE	FALSE	FALSE	FALSE	FALSE	FALSE	FALSE	FALSE
4	SCFD2	NP_689753.2	0	0	-4.3735	-3.57272	-2.048	0.365263	-4.05765	-3.5745	-3.099	FALSE	FALSE	FALSE	FALSE	FALSE	FALSE	TRUE	FALSE	FALSE	FALSE	FALSE	FALSE	FALSE	FALSE
4	FGG	NP_000500.2	0.0230769	0.0878543	-5.5335	-3.84327	-2.7305	0.551509	-4.6446	-3.73725	-3.19595	TRUE	TRUE	FALSE	FALSE	FALSE	FALSE	TRUE	FALSE	FALSE	FALSE	FALSE	FALSE	FALSE	FALSE
11	SAAL1	NP_612430.2	0	0	-4.5285	-3.48495	-2.0045	0.354553	-4.0165	-3.4205	-3.085	FALSE	FALSE	FALSE	FALSE	FALSE	FALSE	FALSE	FALSE	FALSE	FALSE	FALSE	FALSE	FALSE	FALSE
3	MRPL3	NP_009139.1	0	0	-4.152	-3.5075	-2.191	0.341749	-3.9103	-3.559	-3.0181	FALSE	FALSE	FALSE	FALSE	FALSE	FALSE	FALSE	FALSE	FALSE	FALSE	FALSE	FALSE	FALSE	FALSE
4	TIGD4	NP_663772.1	0	0.00648117	-4.8825	-3.58228	-2.791	0.421859	-4.1975	-3.5245	-3.069	FALSE	FALSE	FALSE	FALSE	FALSE	FALSE	TRUE	FALSE	FALSE	FALSE	FALSE	FALSE	FALSE	FALSE
5	CCL28	NP_001288802.1	0	0	-4.279	-3.58969	-1.633	0.386975	-4.0648	-3.6145	-3.0906	FALSE	FALSE	FALSE	FALSE	FALSE	FALSE	FALSE	FALSE	FALSE	FALSE	FALSE	FALSE	FALSE	FALSE
7	LMOD2	NP_997046.1	0.0144044	0.0409972	-5.9695	-3.70945	-3.021	0.44564	-4.369	-3.54275	-3.31195	FALSE	FALSE	FALSE	FALSE	FALSE	FALSE	TRUE	FALSE	FALSE	FALSE	FALSE	FALSE	FALSE	FALSE
X	GSPT2	NP_060564.2	0.253705	0.268906	-5.752	-4.60392	-2.778	0.587484	-5.35815	-4.65775	-3.7625	FALSE	FALSE	FALSE	FALSE	FALSE	FALSE	FALSE	FALSE	FALSE	FALSE	TRUE	FALSE	FALSE	TRUE
15	PATL2	NP_001138584.1	0	0	-3.9205	-3.4888	-1.5465	0.289035	-3.8407	-3.5215	-3.123	FALSE	FALSE	FALSE	FALSE	FALSE	FALSE	FALSE	FALSE	FALSE	FALSE	FALSE	FALSE	FALSE	FALSE
11	OR5AK2	NP_001005323.1	0.00034626	0.0302978	-5.1035	-3.26905	-1.551	0.744912	-4.31825	-3.24625	-2.3045	FALSE	FALSE	FALSE	FALSE	FALSE	FALSE	FALSE	FALSE	FALSE	FALSE	FALSE	FALSE	FALSE	FALSE
3	XXYLT1	NP_689744.3	0	0	-4.358	-3.39319	-2.211	0.39551	-3.9067	-3.403	-2.85	FALSE	FALSE	FALSE	FALSE	FALSE	FALSE	TRUE	FALSE	FALSE	FALSE	FALSE	FALSE	FALSE	FALSE
7	ZFAND2A	NP_872297.2	0	0	-3.903	-3.2016	-1.7275	0.376802	-3.60805	-3.28875	-2.65195	FALSE	FALSE	FALSE	FALSE	FALSE	FALSE	FALSE	FALSE	FALSE	FALSE	FALSE	FALSE	FALSE	FALSE
16	NUBP2	NP_036357.1	0	0	-4.3805	-3.23134	-1.836	0.453234	-3.82	-3.242	-2.62615	FALSE	FALSE	FALSE	FALSE	FALSE	FALSE	TRUE	FALSE	FALSE	FALSE	FALSE	FALSE	FALSE	FALSE
7	LRRN3	NP_001093128.1	0.00436001	0.0903145	-5.165	-3.64458	-2.027	0.619156	-4.59635	-3.53525	-2.9165	FALSE	FALSE	FALSE	FALSE	FALSE	FALSE	FALSE	FALSE	FALSE	FALSE	FALSE	FALSE	FALSE	FALSE
1	TMEM167B	NP_064526.1	0.00146199	0.0270468	-5.1175	-3.73103	-2.459	0.459609	-4.30215	-3.73675	-3.1477	FALSE	FALSE	FALSE	FALSE	FALSE	FALSE	FALSE	FALSE	FALSE	FALSE	FALSE	FALSE	FALSE	FALSE
2	RESP18	NP_001007090.3	0	0	-4.428	-3.4125	-2.2615	0.394115	-3.9442	-3.38975	-2.9121	FALSE	FALSE	FALSE	FALSE	FALSE	FALSE	FALSE	FALSE	FALSE	FALSE	FALSE	FALSE	FALSE	FALSE
5	MGAT1	NP_001108090.1	0.0144806	0.0641882	-5.4715	-3.54539	-2.108	0.697858	-4.5425	-3.4745	-2.6605	FALSE	FALSE	FALSE	FALSE	FALSE	FALSE	FALSE	FALSE	FALSE	FALSE	FALSE	FALSE	FALSE	FALSE
13	SLC7A1	NP_003036.1	0.156075	0.191423	-5.95	-4.22572	-2.5785	0.740094	-5.2068	-4.231	-3.2027	FALSE	FALSE	FALSE	FALSE	FALSE	FALSE	FALSE	FALSE	FALSE	FALSE	FALSE	FALSE	FALSE	FALSE
19	NAT14	NP_065111.1	0	0	-4.528	-3.08796	-2.0865	0.362057	-3.58585	-2.9645	-2.80365	FALSE	FALSE	FALSE	FALSE	FALSE	FALSE	FALSE	FALSE	FALSE	FALSE	FALSE	FALSE	FALSE	FALSE
8	PHYHIP	NP_055574.3	0	0.0401619	-4.9965	-3.90238	-2.733	0.371132	-4.4288	-3.891	-3.4477	FALSE	FALSE	FALSE	FALSE	FALSE	FALSE	FALSE	FALSE	FALSE	FALSE	FALSE	FALSE	FALSE	FALSE
X	JADE3	NP_001070913.1	0.290535	0.202143	-6.3925	-4.60749	-2.263	0.740988	-5.61835	-4.599	-3.63015	FALSE	FALSE	FALSE	FALSE	FALSE	FALSE	FALSE	FALSE	FALSE	FALSE	FALSE	FALSE	FALSE	FALSE
2	NFU1	NP_001002755.1	0	0.0161058	-4.973	-3.68024	-2.52	0.442579	-4.3102	-3.638	-3.1253	FALSE	FALSE	FALSE	FALSE	FALSE	FALSE	FALSE	FALSE	FALSE	FALSE	TRUE	FALSE	FALSE	TRUE
1	APH1A	NP_001071096.1	0.2125	0.178947	-5.6235	-4.25965	-2.268	0.831978	-5.347	-4.32125	-3.091	FALSE	FALSE	FALSE	FALSE	FALSE	FALSE	FALSE	FALSE	FALSE	FALSE	FALSE	FALSE	FALSE	FALSE
12	TWF1	NP_001229326.1	0.0182127	0.0927612	-5.533	-3.85859	-2.2085	0.590011	-4.647	-3.8405	-3.085	FALSE	FALSE	FALSE	FALSE	FALSE	FALSE	FALSE	FALSE	FALSE	FALSE	FALSE	FALSE	FALSE	FALSE
4	SPRY1	NP_001244967.1	0	0	-3.6235	-3.18594	-2.4695	0.207006	-3.483	-3.1705	-2.9254	FALSE	FALSE	FALSE	FALSE	FALSE	FALSE	FALSE	FALSE	FALSE	FALSE	FALSE	FALSE	FALSE	FALSE
11	WEE1	NP_003381.1	0.154561	0.116173	-6.1255	-4.05276	-2.876	0.803901	-5.2536	-3.899	-3.098	FALSE	FALSE	FALSE	FALSE	FALSE	FALSE	FALSE	FALSE	FALSE	FALSE	FALSE	FALSE	FALSE	FALSE
11	DDI1	NP_001001711.1	0	0.0372223	-4.811	-3.53222	-2.1295	0.528902	-4.3655	-3.387	-3.0083	FALSE	FALSE	FALSE	FALSE	FALSE	FALSE	FALSE	FALSE	FALSE	FALSE	FALSE	FALSE	FALSE	FALSE
2	ERCC3	NP_000113.1	0.0310777	0.136842	-5.4665	-3.96425	-2.543	0.593924	-4.8022	-3.9275	-3.17945	FALSE	TRUE	FALSE	FALSE	FALSE	FALSE	FALSE	FALSE	FALSE	FALSE	TRUE	FALSE	FALSE	TRUE
12	ERBB3	NP_001973.2	0	0.00112855	-4.704	-3.66379	-2.4605	0.369088	-4.191	-3.6355	-3.2065	FALSE	TRUE	FALSE	FALSE	FALSE	FALSE	TRUE	FALSE	FALSE	FALSE	TRUE	FALSE	FALSE	TRUE
2	EMX1	NP_004088.2	0	0.119203	-5.013	-3.51437	-1.7585	0.731478	-4.6585	-3.3245	-2.6747	FALSE	FALSE	FALSE	FALSE	FALSE	FALSE	TRUE	FALSE	FALSE	FALSE	FALSE	FALSE	FALSE	FALSE
2	ADD2	NP_001171983.1	0.0172296	0.060432	-5.618	-3.66769	-2.8715	0.574027	-4.52125	-3.5315	-3.0295	FALSE	FALSE	FALSE	FALSE	FALSE	FALSE	TRUE	FALSE	FALSE	FALSE	FALSE	FALSE	FALSE	FALSE
3	DCUN1D1	NP_065691.2	0.372042	0.138822	-7.108	-4.66828	-2.589	1.01764	-6.0525	-4.6485	-3.2982	FALSE	FALSE	FALSE	FALSE	FALSE	FALSE	FALSE	FALSE	FALSE	FALSE	FALSE	FALSE	FALSE	FALSE
2	GALM	NP_620156.1	0	0	-4.161	-3.24419	-2.291	0.31959	-3.6798	-3.2315	-2.8297	FALSE	FALSE	FALSE	FALSE	FALSE	FALSE	FALSE	FALSE	FALSE	FALSE	FALSE	FALSE	FALSE	FALSE
11	SLC15A3	NP_057666.1	0.000101215	0.0140688	-5.07	-3.42118	-2.1115	0.550122	-4.20505	-3.34375	-2.74945	FALSE	FALSE	FALSE	FALSE	FALSE	FALSE	TRUE	FALSE	FALSE	FALSE	FALSE	FALSE	FALSE	FALSE
5	FER	NP_005237.2	0	0.0508125	-4.9185	-3.74913	-1.5515	0.576241	-4.505	-3.759	-2.97875	FALSE	FALSE	FALSE	FALSE	FALSE	FALSE	TRUE	FALSE	FALSE	FALSE	FALSE	FALSE	FALSE	FALSE
X	PCSK1N	NP_037403.1	0	0	-4.269	-3.39401	-2.899	0.271904	-3.7751	-3.33075	-3.094	FALSE	FALSE	FALSE	FALSE	FALSE	FALSE	FALSE	FALSE	FALSE	FALSE	FALSE	FALSE	FALSE	FALSE
8	COMMD5	NP_001074472.1	0	0	-3.97	-3.424	-2.5925	0.185271	-3.652	-3.435	-3.1845	FALSE	FALSE	FALSE	FALSE	FALSE	FALSE	FALSE	FALSE	FALSE	FALSE	FALSE	FALSE	FALSE	FALSE
19	TLE5	NP_945321.1	0	0.0979936	-5.0335	-4.00703	-1.6415	0.487371	-4.6135	-4.043	-3.3848	FALSE	FALSE	FALSE	FALSE	FALSE	FALSE	FALSE	FALSE	FALSE	FALSE	FALSE	FALSE	FALSE	FALSE
2	KCNIP3	NP_038462.1	0.0254577	0.0806636	-5.508	-3.69236	-2.6065	0.60303	-4.6345	-3.515	-3.05125	FALSE	FALSE	FALSE	FALSE	FALSE	FALSE	FALSE	FALSE	FALSE	FALSE	FALSE	FALSE	FALSE	FALSE
11	OR4C46	NP_001004703.1	0.0485965	0.0636842	-5.819	-3.05619	-0.656	1.03958	-4.6859	-2.7745	-1.97695	FALSE	FALSE	FALSE	FALSE	FALSE	FALSE	TRUE	FALSE	FALSE	FALSE	FALSE	FALSE	FALSE	FALSE
14	PIP4P1	NP_001094284.1	0	0.000689497	-4.6535	-3.69128	-2.4775	0.405605	-4.259	-3.6625	-3.174	FALSE	FALSE	FALSE	FALSE	FALSE	FALSE	FALSE	FALSE	FALSE	FALSE	FALSE	FALSE	FALSE	FALSE
10	PNLIPRP1	NP_001290064.1	0	0.0035926	-4.726	-3.55066	-2.318	0.479064	-4.2144	-3.5415	-2.9183	FALSE	FALSE	FALSE	FALSE	FALSE	FALSE	FALSE	FALSE	FALSE	FALSE	FALSE	FALSE	FALSE	FALSE
15	TEX9	NP_940926.1	0	0.000291588	-4.6745	-3.47338	-2	0.465674	-4.1321	-3.4315	-2.9015	FALSE	FALSE	FALSE	FALSE	FALSE	FALSE	TRUE	FALSE	FALSE	FALSE	FALSE	FALSE	FALSE	FALSE
X	ATP11C	NP_001340741.2	0.0855438	0.155564	-5.708	-4.16639	-2.6435	0.564444	-5.008	-4.062	-3.516	FALSE	FALSE	FALSE	FALSE	FALSE	FALSE	FALSE	FALSE	FALSE	FALSE	FALSE	FALSE	FALSE	FALSE
4	TRIM61	NP_001012414.1	0	0	-4.4495	-3.98945	-3.324	0.187015	-4.2464	-3.989	-3.742	FALSE	FALSE	FALSE	FALSE	FALSE	FALSE	TRUE	FALSE	FALSE	FALSE	FALSE	FALSE	FALSE	FALSE
3	ZNF660	NP_775929.2	0.0212836	0.0626959	-5.447	-3.48892	-1.692	0.601561	-4.497	-3.227	-2.9965	FALSE	FALSE	FALSE	FALSE	FALSE	FALSE	TRUE	FALSE	FALSE	FALSE	FALSE	FALSE	FALSE	FALSE
8	TP53INP1	NP_150601.1	0	0	-4.312	-3.42196	-2.4205	0.313379	-3.8425	-3.4045	-3.0265	FALSE	FALSE	FALSE	FALSE	FALSE	FALSE	FALSE	FALSE	FALSE	FALSE	FALSE	FALSE	FALSE	FALSE
5	PCDHGA2	NP_061738.1	0.00863593	0.0246838	-5.5615	-3.38314	-1.263	0.539606	-4.147	-3.2595	-2.817	FALSE	FALSE	FALSE	FALSE	FALSE	FALSE	FALSE	FALSE	FALSE	FALSE	FALSE	FALSE	FALSE	FALSE
1	ISG20L2	NP_001357080.1	0	0	-4.6155	-3.69506	-2.3325	0.475159	-4.32165	-3.70575	-3.075	FALSE	FALSE	FALSE	FALSE	FALSE	FALSE	TRUE	FALSE	FALSE	FALSE	FALSE	FALSE	FALSE	FALSE
17	STX8	NP_004844.1	0	0.000232883	-4.634	-3.42511	-1.808	0.474997	-4.0595	-3.426	-2.7995	FALSE	FALSE	FALSE	FALSE	FALSE	FALSE	FALSE	FALSE	FALSE	FALSE	FALSE	FALSE	FALSE	FALSE
11	NR1H3	NP_005684.2	0	0	-4.5795	-3.58816	-2.6795	0.332784	-4.051	-3.5585	-3.1789	FALSE	FALSE	FALSE	FALSE	FALSE	FALSE	TRUE	FALSE	FALSE	FALSE	FALSE	FALSE	FALSE	FALSE
17	MFAP4	NP_001185624.1	0	0.00545282	-4.7615	-3.68994	-2.8215	0.416954	-4.28965	-3.64075	-3.164	FALSE	FALSE	FALSE	FALSE	FALSE	FALSE	FALSE	FALSE	FALSE	FALSE	FALSE	FALSE	FALSE	FALSE
20	C20orf141	NP_001243467.1	0	0	-4.1555	-3.40339	-2.0245	0.372837	-3.8868	-3.419	-2.9093	FALSE	FALSE	FALSE	FALSE	FALSE	FALSE	FALSE	FALSE	FALSE	FALSE	FALSE	FALSE	FALSE	FALSE
11	OAF	NP_848602.1	0	0	-4.088	-3.2281	-2.3815	0.195482	-3.4547	-3.2265	-2.996	FALSE	FALSE	FALSE	FALSE	FALSE	FALSE	TRUE	FALSE	FALSE	FALSE	FALSE	FALSE	FALSE	FALSE
19	YJEFN3	NP_940939.2	0	0	-4.5815	-3.39613	-2.5725	0.378884	-3.9578	-3.345	-2.9359	FALSE	FALSE	FALSE	FALSE	FALSE	FALSE	TRUE	FALSE	FALSE	FALSE	FALSE	FALSE	FALSE	FALSE
19	EPS15L1	NP_001245305.1	0.0584497	0.0954171	-6.16	-3.79789	-2.3825	0.739149	-4.842	-3.722	-2.888	FALSE	FALSE	FALSE	FALSE	FALSE	FALSE	TRUE	FALSE	FALSE	FALSE	FALSE	FALSE	FALSE	FALSE
5	UGT3A2	NP_777574.2	0	0	-4.268	-3.54325	-2.21	0.337334	-4.003	-3.5425	-3.112	FALSE	FALSE	FALSE	FALSE	FALSE	FALSE	FALSE	FALSE	FALSE	FALSE	FALSE	FALSE	FALSE	FALSE
17	C17orf113	NP_001345590.1	0	0	-4.052	-3.23662	-2.24	0.315256	-3.72475	-3.163	-2.93525	FALSE	FALSE	FALSE	FALSE	FALSE	FALSE	FALSE	FALSE	FALSE	FALSE	FALSE	FALSE	FALSE	FALSE
3	GNAI2	NP_002061.1	0.352145	0.11439	-6.475	-4.49282	-2.315	1.04884	-5.9047	-4.47925	-3.06865	FALSE	FALSE	FALSE	FALSE	FALSE	FALSE	TRUE	FALSE	FALSE	FALSE	FALSE	FALSE	FALSE	FALSE
9	RPS6	NP_001001.2	0.00263158	0.0322368	-5.21	-3.5755	-1.6065	0.598235	-4.346	-3.607	-2.76825	FALSE	FALSE	FALSE	FALSE	FALSE	FALSE	FALSE	FALSE	FALSE	FALSE	FALSE	FALSE	FALSE	FALSE
8	NUGGC	NP_001010906.1	0	0	-4.5835	-3.53502	-1.6085	0.39631	-4.09655	-3.523	-3.04495	FALSE	FALSE	FALSE	FALSE	FALSE	FALSE	FALSE	FALSE	FALSE	FALSE	FALSE	FALSE	FALSE	FALSE
3	SLC25A26	NP_001158268.1	0	0.0164474	-4.821	-3.54806	-0.892	0.629403	-4.359	-3.5975	-2.69	FALSE	FALSE	FALSE	FALSE	FALSE	FALSE	TRUE	FALSE	FALSE	FALSE	TRUE	FALSE	FALSE	TRUE
19	THOP1	NP_003240.1	0	0.00259109	-4.713	-3.40409	-2.4015	0.4834	-4.102	-3.357	-2.7875	FALSE	FALSE	FALSE	FALSE	FALSE	FALSE	FALSE	FALSE	FALSE	FALSE	FALSE	FALSE	FALSE	FALSE
1	GJB3	NP_076872.1	0	0.00600185	-4.9145	-3.24991	-2.4315	0.452699	-3.9555	-3.1065	-2.80555	FALSE	TRUE	FALSE	FALSE	FALSE	FALSE	FALSE	FALSE	FALSE	FALSE	TRUE	FALSE	FALSE	TRUE
7	CAPZA2	NP_006127.1	0.292525	0.123379	-6.755	-4.38832	-2.477	1.0673	-5.90935	-4.34225	-2.9788	FALSE	FALSE	FALSE	FALSE	FALSE	FALSE	TRUE	FALSE	FALSE	FALSE	FALSE	FALSE	FALSE	FALSE
3	ARL8B	NP_060654.1	0.0379585	0.185327	-5.435	-4.0976	-2.604	0.586456	-4.8668	-4.1205	-3.2801	FALSE	FALSE	FALSE	FALSE	FALSE	FALSE	FALSE	FALSE	FALSE	FALSE	FALSE	FALSE	FALSE	FALSE
7	RALA	NP_005393.2	0.623714	0.11827	-6.7645	-5.22126	-1.9325	0.900405	-6.281	-5.394	-3.89675	FALSE	FALSE	FALSE	FALSE	FALSE	FALSE	FALSE	FALSE	FALSE	FALSE	TRUE	FALSE	FALSE	TRUE
5	GOLPH3	NP_071413.1	0.00340204	0.0460276	-5.3225	-3.70496	-2.1365	0.581509	-4.4405	-3.733	-2.889	FALSE	FALSE	FALSE	FALSE	FALSE	FALSE	FALSE	FALSE	FALSE	FALSE	FALSE	FALSE	FALSE	FALSE
9	PTGES2	NP_079348.1	0	0	-4.5425	-3.3066	-1.929	0.343344	-3.72415	-3.33375	-2.821	FALSE	FALSE	FALSE	FALSE	FALSE	FALSE	FALSE	FALSE	FALSE	FALSE	FALSE	FALSE	FALSE	FALSE
1	S100A16	NP_001303936.1	0	0.0108696	-4.734	-3.42544	-1.8145	0.573894	-4.21885	-3.37375	-2.72285	FALSE	FALSE	FALSE	FALSE	FALSE	FALSE	FALSE	FALSE	FALSE	FALSE	FALSE	FALSE	FALSE	FALSE
20	PLCB4	NP_000924.3	0.0973446	0.161705	-5.779	-4.13586	-2.6435	0.642984	-5.0475	-4.0725	-3.31125	FALSE	FALSE	FALSE	FALSE	FALSE	FALSE	TRUE	FALSE	FALSE	FALSE	TRUE	FALSE	FALSE	TRUE
4	BANK1	NP_060405.5	0	0	-4.2435	-3.47382	-1.9185	0.464627	-4.052	-3.542	-2.7935	FALSE	FALSE	FALSE	FALSE	FALSE	FALSE	TRUE	FALSE	FALSE	FALSE	FALSE	FALSE	FALSE	FALSE
8	SNTB1	NP_066301.1	0	0.0199805	-4.893	-3.4451	-2.363	0.57087	-4.2285	-3.41	-2.69785	FALSE	FALSE	FALSE	FALSE	FALSE	FALSE	TRUE	FALSE	FALSE	FALSE	FALSE	FALSE	FALSE	FALSE
19	APOC2	NP_000474.2	0	0.00805585	-4.8295	-3.69888	-2.259	0.381822	-4.2105	-3.67775	-3.2346	FALSE	TRUE	FALSE	FALSE	FALSE	FALSE	FALSE	FALSE	FALSE	FALSE	FALSE	FALSE	FALSE	FALSE
3	AADACL2	NP_997248.2	0	0.0391967	-5.0215	-3.63456	-1.3905	0.570683	-4.40455	-3.63325	-2.90395	FALSE	FALSE	FALSE	FALSE	FALSE	FALSE	FALSE	FALSE	FALSE	FALSE	FALSE	FALSE	FALSE	FALSE
16	PKMYT1	NP_004194.3	0	0.0013891	-4.659	-3.43015	-2.3495	0.463769	-4.1126	-3.3375	-2.889	FALSE	FALSE	FALSE	FALSE	FALSE	FALSE	TRUE	FALSE	FALSE	FALSE	FALSE	FALSE	FALSE	FALSE
10	SLC18A2	NP_003045.2	0.0588307	0.158624	-5.353	-3.89209	-1.834	0.7302	-4.9292	-3.8395	-2.9625	FALSE	FALSE	FALSE	FALSE	FALSE	FALSE	FALSE	FALSE	FALSE	FALSE	FALSE	FALSE	FALSE	FALSE
19	KIR2DL1	NP_055033.2	0.0082966	0.0567799	-5.1555	-3.24046	0.215	0.77689	-4.4027	-3.1115	-2.3766	FALSE	FALSE	FALSE	FALSE	FALSE	FALSE	FALSE	TRUE	FALSE	FALSE	FALSE	FALSE	FALSE	FALSE
3	MASP1	NP_624302.1	0	0	-4.569	-3.47284	-1.971	0.391703	-3.983	-3.474	-2.9565	FALSE	FALSE	FALSE	FALSE	FALSE	FALSE	FALSE	FALSE	FALSE	FALSE	TRUE	FALSE	FALSE	TRUE
9	OR1L8	NP_001004454.1	0.0901766	0.0905195	-5.797	-3.7185	-0.617	0.869369	-5.0068	-3.6285	-2.6756	FALSE	FALSE	FALSE	FALSE	FALSE	FALSE	FALSE	FALSE	FALSE	FALSE	FALSE	FALSE	FALSE	FALSE
X	ARMCX5-GPRASP2	NP_001186747.1	0.0378437	0.0670834	-6.551	-3.99317	-2.6325	0.510878	-4.6362	-3.97	-3.332	FALSE	FALSE	FALSE	FALSE	FALSE	FALSE	FALSE	FALSE	FALSE	FALSE	FALSE	FALSE	FALSE	FALSE
11	PELI3	NP_659502.2	0.00870882	0.042282	-5.335	-3.59076	-2.1665	0.473834	-4.3375	-3.4185	-3.165	FALSE	FALSE	FALSE	FALSE	FALSE	FALSE	FALSE	FALSE	FALSE	FALSE	FALSE	FALSE	FALSE	FALSE
19	ZNF536	NP_055532.1	0	0.0249568	-4.8015	-3.45327	-2.0725	0.480134	-4.24345	-3.35875	-2.941	FALSE	FALSE	FALSE	FALSE	FALSE	FALSE	TRUE	FALSE	FALSE	FALSE	FALSE	FALSE	FALSE	FALSE
10	ADIRF	NP_006820.1	0	0	-3.9805	-3.48729	-2.1925	0.274112	-3.7767	-3.545	-3.1312	FALSE	FALSE	FALSE	FALSE	FALSE	FALSE	FALSE	FALSE	FALSE	FALSE	FALSE	FALSE	FALSE	FALSE
5	SLC35A4	NP_542401.1	0	0.00124047	-4.7745	-3.42297	-2.369	0.394334	-3.9858	-3.366	-2.9576	FALSE	FALSE	FALSE	FALSE	FALSE	FALSE	FALSE	FALSE	FALSE	FALSE	FALSE	FALSE	FALSE	FALSE
2	FHL2	NP_963849.1	0	0	-4.556	-3.57232	-2.159	0.452375	-4.27415	-3.5155	-3.018	FALSE	FALSE	FALSE	FALSE	FALSE	FALSE	FALSE	FALSE	FALSE	FALSE	FALSE	FALSE	FALSE	FALSE
1	HMGN2	NP_005508.1	0.241869	0.119456	-6.5885	-4.08599	-2.1365	1.18037	-5.712	-4.0475	-2.4715	FALSE	FALSE	FALSE	FALSE	FALSE	FALSE	FALSE	FALSE	FALSE	FALSE	FALSE	FALSE	FALSE	FALSE
19	ATCAY	NP_149053.1	0.050758	0.0671095	-5.7125	-3.58777	-2.0035	0.697823	-4.7195	-3.3435	-2.923	FALSE	TRUE	FALSE	FALSE	FALSE	FALSE	FALSE	FALSE	FALSE	FALSE	FALSE	FALSE	FALSE	FALSE
X	CXorf58	NP_689974.2	0	0	-4.1745	-3.96239	-2.7685	0.200181	-4.1315	-4.0405	-3.685	FALSE	FALSE	FALSE	FALSE	FALSE	FALSE	FALSE	TRUE	FALSE	FALSE	FALSE	FALSE	FALSE	FALSE
12	ATN1	NP_001007027.1	0	0	-4.214	-3.35155	-2.6135	0.241134	-3.6555	-3.3455	-3.047	FALSE	FALSE	FALSE	FALSE	FALSE	FALSE	FALSE	FALSE	FALSE	FALSE	TRUE	FALSE	FALSE	TRUE
2	C2orf76	NP_001309258.1	0	0.00210526	-4.721	-3.47141	-2.8785	0.354849	-3.9918	-3.3945	-3.0894	FALSE	FALSE	FALSE	FALSE	FALSE	FALSE	FALSE	FALSE	FALSE	FALSE	FALSE	FALSE	FALSE	FALSE
2	HDLBP	NP_005327.1	0.0664182	0.0847404	-5.802	-3.86437	-2.236	0.666764	-4.86165	-3.7665	-3.08985	FALSE	FALSE	FALSE	FALSE	FALSE	FALSE	TRUE	FALSE	FALSE	FALSE	FALSE	FALSE	FALSE	FALSE
22	CACNA1I	NP_066919.2	0.0781372	0.0977015	-5.683	-3.76332	-2.547	0.740494	-4.9455	-3.492	-2.997	FALSE	FALSE	FALSE	FALSE	FALSE	FALSE	TRUE	FALSE	FALSE	FALSE	FALSE	FALSE	FALSE	FALSE
20	ACOT8	NP_005460.2	0	0.000749204	-4.69	-3.48755	-2.797	0.397263	-4.0616	-3.4245	-3.0045	FALSE	FALSE	FALSE	FALSE	FALSE	FALSE	FALSE	FALSE	FALSE	FALSE	FALSE	FALSE	FALSE	FALSE
4	TRIML1	NP_848651.2	0	0	-4.368	-3.40429	-2.2085	0.346542	-3.9145	-3.358	-2.99435	FALSE	FALSE	FALSE	FALSE	FALSE	FALSE	FALSE	FALSE	FALSE	FALSE	FALSE	FALSE	FALSE	FALSE
14	PALS1	NP_071919.2	0	0.00182482	-4.7275	-3.64225	-2.182	0.419948	-4.22	-3.6315	-3.10055	FALSE	FALSE	FALSE	FALSE	FALSE	FALSE	FALSE	FALSE	FALSE	FALSE	FALSE	FALSE	FALSE	FALSE
6	ACOT13	NP_060943.1	0	0	-4.0075	-3.39881	-2.216	0.33212	-3.82855	-3.4245	-2.9445	FALSE	FALSE	FALSE	FALSE	FALSE	FALSE	FALSE	FALSE	FALSE	FALSE	FALSE	FALSE	FALSE	FALSE
22	MCHR1	NP_005288.4	0	0	-4.556	-3.27132	-2.0185	0.462475	-3.935	-3.205	-2.715	FALSE	FALSE	FALSE	FALSE	FALSE	FALSE	FALSE	FALSE	FALSE	FALSE	FALSE	FALSE	FALSE	FALSE
1	CENPS	NP_954988.1	0	0	-4.5365	-3.83111	-2.676	0.354353	-4.2708	-3.861	-3.3464	FALSE	FALSE	FALSE	FALSE	FALSE	FALSE	FALSE	FALSE	FALSE	FALSE	FALSE	FALSE	FALSE	FALSE
6	MAP7	NP_001185543.1	0	0	-4.455	-3.3774	-2.3595	0.319441	-3.8465	-3.3135	-3.0155	FALSE	FALSE	FALSE	FALSE	FALSE	FALSE	FALSE	FALSE	FALSE	FALSE	FALSE	FALSE	FALSE	FALSE
4	ABHD18	NP_001345383.1	0	0	-4.255	-3.46798	-2.552	0.329525	-3.8911	-3.487	-3.0165	FALSE	FALSE	FALSE	FALSE	FALSE	FALSE	FALSE	FALSE	FALSE	FALSE	FALSE	FALSE	FALSE	FALSE
17	ARL17B	NP_001317169.1	1	0	-8.112	-7.04693	-5.395	0.42705	-7.5775	-7.0655	-6.4922	FALSE	FALSE	FALSE	FALSE	FALSE	FALSE	FALSE	TRUE	TRUE	FALSE	FALSE	FALSE	FALSE	FALSE
7	PON3	NP_000931.1	0	0	-4.3445	-3.40075	-2.048	0.352918	-3.885	-3.374	-2.9647	FALSE	FALSE	FALSE	FALSE	FALSE	FALSE	FALSE	FALSE	FALSE	FALSE	FALSE	FALSE	FALSE	FALSE
7	DPY19L1	NP_056098.1	0.00877193	0.115929	-5.461	-3.8764	-2.197	0.636782	-4.676	-3.9455	-2.9505	FALSE	FALSE	FALSE	FALSE	FALSE	FALSE	TRUE	FALSE	FALSE	FALSE	FALSE	FALSE	FALSE	FALSE
2	EIF2AK3	NP_004827.4	0	0	-4.5325	-3.64826	-2.293	0.409667	-4.274	-3.5875	-3.152	FALSE	TRUE	FALSE	FALSE	FALSE	FALSE	TRUE	FALSE	FALSE	FALSE	TRUE	FALSE	FALSE	TRUE
12	SOCS2	NP_001257397.1	0.00453721	0.0913491	-5.2135	-3.77939	-2.613	0.585883	-4.607	-3.736	-3.0305	FALSE	FALSE	FALSE	FALSE	FALSE	FALSE	TRUE	FALSE	FALSE	FALSE	FALSE	FALSE	FALSE	FALSE
1	CRTC2	NP_859066.1	0	0.0315468	-4.9775	-3.6819	-2.0855	0.493519	-4.394	-3.6355	-3.072	FALSE	FALSE	FALSE	FALSE	FALSE	FALSE	TRUE	FALSE	FALSE	FALSE	FALSE	FALSE	FALSE	FALSE
5	ADAMTS16	NP_620687.2	0	0	-4.4545	-3.39127	-1.982	0.423094	-3.9875	-3.3635	-2.8565	FALSE	FALSE	FALSE	FALSE	FALSE	FALSE	FALSE	FALSE	FALSE	FALSE	FALSE	FALSE	FALSE	FALSE
1	HJV	NP_998818.1	0	0	-3.7855	-3.29101	-2.3495	0.234572	-3.6075	-3.29	-2.9878	FALSE	FALSE	FALSE	FALSE	FALSE	FALSE	FALSE	FALSE	FALSE	FALSE	FALSE	FALSE	FALSE	FALSE
11	OR10A6	NP_001004461.1	0	0	-4.525	-3.1093	-1.0925	0.619238	-3.9538	-3.104	-2.3022	FALSE	FALSE	FALSE	FALSE	FALSE	FALSE	FALSE	FALSE	FALSE	TRUE	FALSE	FALSE	FALSE	FALSE
17	TNFSF12-TNFSF13	NP_742086.1	0.000281452	0.0773994	-5.0565	-3.60783	-2.6235	0.550885	-4.5123	-3.424	-3.0611	FALSE	FALSE	FALSE	FALSE	FALSE	FALSE	FALSE	FALSE	FALSE	FALSE	FALSE	FALSE	FALSE	FALSE
7	ORAI2	NP_001119812.1	0.136842	0.147632	-6.156	-4.09042	-2.3885	0.804262	-5.2071	-4.0605	-3.0275	FALSE	FALSE	FALSE	FALSE	FALSE	FALSE	FALSE	FALSE	FALSE	FALSE	FALSE	FALSE	FALSE	FALSE
20	SNAI1	NP_005976.2	0	0	-4.5545	-3.70619	-2.815	0.391234	-4.2514	-3.6305	-3.2431	FALSE	FALSE	FALSE	FALSE	FALSE	FALSE	TRUE	FALSE	FALSE	FALSE	FALSE	FALSE	FALSE	FALSE
19	ZNF791	NP_699189.2	0.0774606	0.0738924	-6.0805	-3.88681	-2.8185	0.658585	-4.90125	-3.664	-3.2415	FALSE	FALSE	FALSE	FALSE	FALSE	FALSE	FALSE	FALSE	FALSE	FALSE	FALSE	FALSE	FALSE	FALSE
14	RPS6KA5	NP_004746.2	0	0	-4.205	-3.73647	-1.726	0.446317	-4.193	-3.857	-3.076	FALSE	FALSE	FALSE	FALSE	FALSE	FALSE	TRUE	FALSE	FALSE	FALSE	FALSE	FALSE	FALSE	FALSE
15	FAN1	NP_055782.3	0	0.00031674	-4.704	-3.44594	-2.4195	0.453889	-4.074	-3.425	-2.8565	FALSE	FALSE	FALSE	FALSE	FALSE	FALSE	FALSE	FALSE	FALSE	FALSE	FALSE	FALSE	FALSE	FALSE
7	NCF1	NP_000256.4	0	0.120378	-5.004	-4.15159	-2.8135	0.37871	-4.64355	-4.172	-3.6335	FALSE	TRUE	FALSE	FALSE	FALSE	FALSE	FALSE	TRUE	FALSE	FALSE	FALSE	FALSE	FALSE	FALSE
11	OR2AG1	NP_001004489.1	0.0105263	0.0736842	-5.5605	-3.50095	-1.2495	0.76039	-4.5485	-3.483	-2.5244	FALSE	FALSE	FALSE	FALSE	FALSE	FALSE	FALSE	FALSE	FALSE	FALSE	FALSE	FALSE	FALSE	FALSE
7	TMEM130	NP_001127923.1	0	0	-4.294	-3.44296	-2.191	0.229113	-3.754	-3.429	-3.1755	FALSE	FALSE	FALSE	FALSE	FALSE	FALSE	FALSE	FALSE	FALSE	FALSE	FALSE	FALSE	FALSE	FALSE
19	SPACA4	NP_598005.1	0.101144	0.0627002	-5.915	-3.77477	-1.7905	0.793772	-5.0777	-3.559	-2.9735	FALSE	FALSE	FALSE	FALSE	FALSE	FALSE	FALSE	FALSE	FALSE	FALSE	FALSE	FALSE	FALSE	FALSE
1	NECAP2	NP_001138749.1	0.00142248	0.0374585	-5.224	-3.48828	-2.9255	0.514315	-4.30815	-3.27275	-2.9995	FALSE	FALSE	FALSE	FALSE	FALSE	FALSE	FALSE	FALSE	FALSE	FALSE	FALSE	FALSE	FALSE	FALSE
8	DEFA5	NP_066290.1	0	0.00679117	-4.663	-2.77357	-2.3355	0.38899	-3.0122	-2.6745	-2.5173	FALSE	FALSE	FALSE	FALSE	FALSE	FALSE	TRUE	FALSE	FALSE	TRUE	FALSE	FALSE	FALSE	FALSE
5	AGGF1	NP_060516.2	0	0	-4.146	-3.54075	-2.42	0.360105	-3.962	-3.59875	-3.021	FALSE	FALSE	FALSE	FALSE	FALSE	FALSE	FALSE	FALSE	FALSE	FALSE	FALSE	FALSE	FALSE	FALSE
4	ANAPC4	NP_001273685.1	0.00209132	0.0605089	-5.2005	-3.9021	-2.4555	0.430085	-4.493	-3.87	-3.376	FALSE	FALSE	FALSE	FALSE	FALSE	FALSE	TRUE	FALSE	FALSE	FALSE	FALSE	FALSE	FALSE	FALSE
8	GINS4	NP_115712.1	0	0	-4.061	-3.51137	-2.629	0.24592	-3.8352	-3.515	-3.1951	FALSE	FALSE	FALSE	FALSE	FALSE	FALSE	FALSE	FALSE	FALSE	FALSE	FALSE	FALSE	FALSE	FALSE
16	C16orf86	NP_001013002.2	0.0030171	0.0129065	-5.2175	-3.44462	-2.2665	0.386478	-3.96825	-3.356	-3.056	FALSE	FALSE	FALSE	FALSE	FALSE	FALSE	FALSE	FALSE	FALSE	FALSE	FALSE	FALSE	FALSE	FALSE
3	IMPDH2	NP_000875.2	0.0826271	0.156222	-5.831	-3.99472	-2.215	0.752732	-4.99065	-4.003	-2.97235	FALSE	FALSE	FALSE	FALSE	FALSE	FALSE	FALSE	FALSE	FALSE	FALSE	FALSE	FALSE	FALSE	FALSE
10	TMEM236	NP_001092314.1	0	0	-4.125	-3.43417	-1.7315	0.364585	-3.9195	-3.44775	-2.9715	FALSE	FALSE	FALSE	FALSE	FALSE	FALSE	FALSE	FALSE	FALSE	FALSE	FALSE	FALSE	FALSE	FALSE
1	CDC42BPA	NP_003598.2	6.44205e-05	0.0582362	-5.0635	-3.73038	-2.0305	0.455267	-4.41475	-3.664	-3.211	FALSE	FALSE	FALSE	FALSE	FALSE	FALSE	TRUE	FALSE	FALSE	FALSE	FALSE	FALSE	FALSE	FALSE
14	ARID4A	NP_002883.3	0.0239082	0.0746137	-5.3075	-3.76513	-2.52	0.554786	-4.61	-3.6595	-3.138	FALSE	FALSE	FALSE	FALSE	FALSE	FALSE	TRUE	FALSE	FALSE	FALSE	FALSE	FALSE	FALSE	FALSE
5	IGIP	NP_001007190.1	0	0	-3.344	-3.14047	-3.062	0.0341143	-3.17	-3.138	-3.106	FALSE	FALSE	FALSE	FALSE	FALSE	FALSE	FALSE	FALSE	FALSE	FALSE	FALSE	FALSE	FALSE	FALSE
2	ANKRD36C	NP_001297083.1	0.153496	0.0346327	-6.5165	-3.99763	-0.058	0.87312	-5.6665	-3.6495	-3.3975	FALSE	FALSE	FALSE	FALSE	FALSE	FALSE	FALSE	FALSE	FALSE	FALSE	FALSE	FALSE	FALSE	FALSE
19	TTYH1	NP_065710.1	0	0.0569973	-4.97	-3.62485	-1.7805	0.661591	-4.48625	-3.6525	-2.718	FALSE	FALSE	FALSE	FALSE	FALSE	FALSE	TRUE	FALSE	FALSE	FALSE	FALSE	FALSE	FALSE	FALSE
10	PHYHIPL	NP_001137246.1	0	0.0111398	-4.7735	-3.84705	-2.6895	0.337478	-4.35135	-3.82175	-3.4266	FALSE	FALSE	FALSE	FALSE	FALSE	FALSE	FALSE	FALSE	FALSE	FALSE	FALSE	FALSE	FALSE	FALSE
16	SLC22A31	NP_001371693.1	0	0	-4.1525	-3.09146	-1.851	0.413059	-3.69375	-3.0465	-2.5955	FALSE	FALSE	FALSE	FALSE	FALSE	FALSE	TRUE	FALSE	FALSE	FALSE	FALSE	FALSE	FALSE	FALSE
15	SPG21	NP_057714.1	0	0.000185322	-4.6375	-3.61705	-2.7115	0.329069	-4.08925	-3.56625	-3.242	FALSE	TRUE	FALSE	FALSE	FALSE	FALSE	FALSE	FALSE	FALSE	FALSE	FALSE	FALSE	FALSE	FALSE
14	REC8	NP_005123.2	0.00418293	0.0366704	-5.593	-3.55081	-2.73	0.445088	-4.2665	-3.415	-3.13005	FALSE	FALSE	FALSE	FALSE	FALSE	FALSE	FALSE	FALSE	FALSE	FALSE	FALSE	FALSE	FALSE	FALSE
1	KANK4	NP_859063.3	0	0	-4.349	-3.34246	-2.092	0.32462	-3.83305	-3.2895	-2.97745	FALSE	FALSE	FALSE	FALSE	FALSE	FALSE	TRUE	FALSE	FALSE	FALSE	FALSE	FALSE	FALSE	FALSE
7	MYL7	NP_067046.1	0.0365497	0.0804094	-5.895	-3.63626	-2.662	0.721657	-4.699	-3.51075	-2.76025	FALSE	FALSE	FALSE	FALSE	FALSE	FALSE	FALSE	FALSE	FALSE	FALSE	FALSE	FALSE	FALSE	FALSE
3	RBP1	NP_002890.2	0	0	-3.582	-3.29125	-2.877	0.117769	-3.4381	-3.299	-3.1345	FALSE	FALSE	FALSE	FALSE	FALSE	FALSE	FALSE	FALSE	FALSE	FALSE	FALSE	FALSE	FALSE	FALSE
5	ANXA2R	NP_001014301.1	0	0.00465252	-4.8735	-3.40212	-3.1	0.270545	-3.7877	-3.301	-3.1785	FALSE	FALSE	FALSE	FALSE	FALSE	FALSE	FALSE	FALSE	FALSE	FALSE	FALSE	FALSE	FALSE	FALSE
1	GREM2	NP_071914.3	0	0.0221607	-4.828	-3.52929	-2.3915	0.508847	-4.2729	-3.4745	-2.8975	FALSE	FALSE	FALSE	FALSE	FALSE	FALSE	FALSE	FALSE	FALSE	FALSE	FALSE	FALSE	FALSE	FALSE
16	ZNF768	NP_078947.3	0.00431931	0.0644697	-5.1825	-3.60962	-2.125	0.557893	-4.459	-3.512	-2.985	FALSE	FALSE	FALSE	FALSE	FALSE	FALSE	FALSE	FALSE	FALSE	FALSE	FALSE	FALSE	FALSE	FALSE
19	ZNF226	NP_001139692.1	0.00277008	0.114958	-5.093	-3.68763	-1.695	0.685757	-4.691	-3.59125	-2.85215	FALSE	FALSE	FALSE	FALSE	FALSE	FALSE	FALSE	FALSE	FALSE	FALSE	FALSE	FALSE	FALSE	FALSE
10	ZNF511	NP_665805.2	0	0	-4.1755	-3.22886	-1.9735	0.409175	-3.79275	-3.20925	-2.705	FALSE	FALSE	FALSE	FALSE	FALSE	FALSE	FALSE	FALSE	FALSE	FALSE	FALSE	FALSE	FALSE	FALSE
2	ACTR2	NP_001005386.1	0.323471	0.170413	-6.693	-4.60728	-2.496	0.846724	-5.7595	-4.602	-3.47045	FALSE	FALSE	FALSE	FALSE	FALSE	FALSE	FALSE	FALSE	FALSE	FALSE	FALSE	FALSE	FALSE	FALSE
9	TSTD2	NP_640339.4	0	0	-3.8145	-3.41335	-2.3415	0.195878	-3.6485	-3.4365	-3.1496	FALSE	FALSE	FALSE	FALSE	FALSE	FALSE	FALSE	FALSE	FALSE	FALSE	FALSE	FALSE	FALSE	FALSE
4	SORCS2	NP_065828.2	0	5.37606e-05	-4.6265	-3.31729	-1.839	0.468311	-3.9695	-3.287	-2.7325	FALSE	FALSE	FALSE	FALSE	FALSE	FALSE	TRUE	FALSE	FALSE	FALSE	FALSE	FALSE	FALSE	FALSE
7	ZYX	NP_001010972.1	0	0	-4.189	-3.33213	-2.0015	0.404286	-3.90845	-3.28475	-2.84205	FALSE	FALSE	FALSE	FALSE	FALSE	FALSE	TRUE	FALSE	FALSE	FALSE	FALSE	FALSE	FALSE	FALSE
11	SVIP	NP_683691.1	0	0	-4.4685	-3.56379	-2.4435	0.350239	-4.0444	-3.536	-3.13295	FALSE	FALSE	FALSE	FALSE	FALSE	FALSE	FALSE	FALSE	FALSE	FALSE	FALSE	FALSE	FALSE	FALSE
9	DOLPP1	NP_001129389.1	0	0.0216718	-5.0205	-3.6093	-2.6505	0.437871	-4.28105	-3.4855	-3.144	FALSE	FALSE	FALSE	FALSE	FALSE	FALSE	FALSE	FALSE	FALSE	FALSE	FALSE	FALSE	FALSE	FALSE
10	PDZD7	NP_001182192.1	0	0	-4.267	-3.27177	-2.719	0.260563	-3.6654	-3.1975	-3.004	FALSE	FALSE	FALSE	FALSE	FALSE	FALSE	FALSE	FALSE	FALSE	FALSE	FALSE	FALSE	FALSE	FALSE
19	HAMP	NP_066998.1	0	0	-3.4545	-3.20188	-3.069	0.0576501	-3.282	-3.194	-3.1354	FALSE	TRUE	FALSE	FALSE	FALSE	FALSE	FALSE	FALSE	FALSE	FALSE	FALSE	FALSE	FALSE	FALSE
8	EXT1	NP_000118.2	0.0865746	0.119719	-5.8315	-3.93489	-1.602	0.743068	-4.994	-3.856	-3.0045	TRUE	FALSE	TRUE	FALSE	FALSE	FALSE	TRUE	FALSE	FALSE	FALSE	TRUE	FALSE	FALSE	TRUE
17	SPECC1	NP_001028725.1	0	0	-4.5075	-3.40082	-1.869	0.428454	-4.0185	-3.35975	-2.8715	FALSE	FALSE	FALSE	FALSE	FALSE	FALSE	TRUE	FALSE	FALSE	FALSE	FALSE	FALSE	FALSE	FALSE
8	EIF3E	NP_001559.1	0.184211	0.141604	-6.584	-4.24888	-2.23	0.821879	-5.415	-4.15225	-3.244	FALSE	FALSE	FALSE	FALSE	FALSE	FALSE	TRUE	FALSE	FALSE	FALSE	FALSE	FALSE	FALSE	FALSE
7	C7orf57	NP_001093629.1	0	0	-4.0775	-3.33423	-2.602	0.182721	-3.5796	-3.3225	-3.112	FALSE	FALSE	FALSE	FALSE	FALSE	FALSE	FALSE	FALSE	FALSE	FALSE	FALSE	FALSE	FALSE	FALSE
16	CTF1	NP_001321.1	0.00340403	0.00157109	-6.303	-3.10097	-2.1665	0.431913	-3.6646	-3.0215	-2.637	FALSE	FALSE	FALSE	FALSE	FALSE	FALSE	TRUE	FALSE	FALSE	FALSE	FALSE	FALSE	FALSE	FALSE
17	MRM3	NP_060616.1	0	0	-4.101	-3.31982	-2.492	0.313165	-3.776	-3.271	-2.942	FALSE	FALSE	FALSE	FALSE	FALSE	FALSE	FALSE	FALSE	FALSE	FALSE	FALSE	FALSE	FALSE	FALSE
1	ACTRT2	NP_536356.3	0	0.00114106	-4.699	-3.29317	-2.0205	0.430326	-3.891	-3.244	-2.779	FALSE	FALSE	FALSE	FALSE	FALSE	FALSE	TRUE	FALSE	FALSE	FALSE	FALSE	FALSE	FALSE	FALSE
1	SIKE1	NP_001095866.1	0	0	-4.351	-3.62461	-2.444	0.341553	-4.0863	-3.624	-3.1864	FALSE	FALSE	FALSE	FALSE	FALSE	FALSE	FALSE	FALSE	FALSE	FALSE	FALSE	FALSE	FALSE	FALSE
11	PTDSS2	NP_110410.1	0	0	-4.603	-3.71623	-2.468	0.386372	-4.2235	-3.72825	-3.193	FALSE	FALSE	FALSE	FALSE	FALSE	FALSE	FALSE	FALSE	FALSE	FALSE	FALSE	FALSE	FALSE	FALSE
12	NPFF	NP_001307225.1	0	0	-4.42	-3.40615	-2.615	0.248336	-3.7482	-3.3585	-3.1274	FALSE	FALSE	FALSE	FALSE	FALSE	FALSE	FALSE	FALSE	FALSE	FALSE	FALSE	FALSE	FALSE	FALSE
8	DPYSL2	NP_001377.1	0.00788261	0.0928935	-5.334	-4.18424	-3.1485	0.32119	-4.61875	-4.145	-3.8005	FALSE	FALSE	FALSE	FALSE	FALSE	FALSE	FALSE	FALSE	FALSE	FALSE	FALSE	FALSE	FALSE	FALSE
10	NOLC1	NP_001271317.1	0	0	-4.087	-3.29736	-1.518	0.28313	-3.6585	-3.278	-2.9955	FALSE	TRUE	FALSE	FALSE	FALSE	FALSE	TRUE	FALSE	FALSE	FALSE	FALSE	FALSE	FALSE	FALSE
1	EPHA10	NP_001092909.1	0.00127023	0.0154084	-5.253	-3.32909	-2.047	0.528824	-4.0867	-3.2415	-2.7205	FALSE	FALSE	FALSE	FALSE	FALSE	FALSE	FALSE	FALSE	FALSE	FALSE	FALSE	FALSE	FALSE	FALSE
6	PRPH2	NP_000313.2	0	0	-4.381	-3.46829	-1.636	0.447785	-3.992	-3.526	-2.8455	FALSE	FALSE	FALSE	FALSE	FALSE	FALSE	FALSE	FALSE	FALSE	FALSE	FALSE	FALSE	FALSE	FALSE
2	PNPT1	NP_149100.2	0	0	-4.5105	-3.60777	-2.5315	0.573719	-4.385	-3.5925	-2.8293	FALSE	FALSE	FALSE	FALSE	FALSE	FALSE	TRUE	FALSE	FALSE	FALSE	TRUE	FALSE	FALSE	TRUE
1	H2AC21	NP_778235.1	0.263158	0.102243	-6.4735	-4.0347	-2.028	1.17043	-5.67945	-3.93875	-2.5675	FALSE	FALSE	FALSE	FALSE	FALSE	FALSE	FALSE	FALSE	FALSE	FALSE	FALSE	FALSE	FALSE	FALSE
14	COCH	NP_004077.1	0	0.0363409	-5.0415	-3.75113	-2.8485	0.454731	-4.392	-3.695	-3.19845	TRUE	FALSE	FALSE	FALSE	FALSE	FALSE	TRUE	FALSE	FALSE	FALSE	FALSE	FALSE	FALSE	FALSE
10	EBF3	NP_001005463.1	0.213582	0.14932	-6.525	-4.27437	-1.909	0.875274	-5.47775	-4.241	-3.12775	FALSE	FALSE	FALSE	FALSE	FALSE	FALSE	FALSE	FALSE	FALSE	FALSE	TRUE	TRUE	TRUE	TRUE
19	CRX	NP_000545.1	0	0	-4.04	-3.39841	-1.8375	0.368399	-3.9656	-3.359	-2.9499	TRUE	FALSE	FALSE	FALSE	FALSE	FALSE	FALSE	FALSE	FALSE	FALSE	TRUE	FALSE	FALSE	TRUE
1	C1orf35	NP_077295.1	0	0	-4.1985	-3.36039	-2.3805	0.347685	-3.8556	-3.339	-2.921	FALSE	FALSE	FALSE	FALSE	FALSE	FALSE	FALSE	FALSE	FALSE	FALSE	FALSE	FALSE	FALSE	FALSE
13	DCT	NP_001123361.1	0	0	-4.073	-3.37386	-2.0685	0.252539	-3.662	-3.4145	-3.0265	FALSE	FALSE	FALSE	FALSE	FALSE	FALSE	TRUE	FALSE	FALSE	FALSE	FALSE	FALSE	FALSE	FALSE
11	OR4P4	NP_001004124.1	0.00786851	0.0491345	-5.4305	-3.40654	-2.3155	0.679225	-4.4101	-3.3175	-2.5549	FALSE	FALSE	FALSE	FALSE	FALSE	FALSE	TRUE	TRUE	FALSE	FALSE	FALSE	FALSE	FALSE	FALSE
9	IFNA4	NP_066546.1	0.0116016	0.0551783	-5.255	-3.41463	-1.5615	0.724307	-4.42485	-3.35775	-2.52215	FALSE	FALSE	FALSE	FALSE	FALSE	FALSE	FALSE	FALSE	FALSE	FALSE	FALSE	FALSE	FALSE	FALSE
17	SPAG9	NP_001124000.1	0	0	-4.5125	-3.73598	-2.2905	0.35048	-4.27	-3.6875	-3.306	FALSE	FALSE	FALSE	FALSE	FALSE	FALSE	FALSE	FALSE	FALSE	FALSE	FALSE	FALSE	FALSE	FALSE
9	KLF4	NP_004226.3	0.00709834	0.0631925	-5.353	-3.39316	-1.8295	0.666084	-4.50575	-3.1815	-2.7165	FALSE	FALSE	FALSE	FALSE	FALSE	FALSE	FALSE	FALSE	FALSE	FALSE	FALSE	FALSE	FALSE	FALSE
9	C9orf64	NP_115683.3	0	0	-4.0225	-3.44469	-2.629	0.189635	-3.681	-3.4505	-3.196	FALSE	FALSE	FALSE	FALSE	FALSE	FALSE	FALSE	FALSE	FALSE	FALSE	FALSE	FALSE	FALSE	FALSE
4	ZNF732	NP_001131080.1	0.0747844	0.0615522	-6.099	-3.64367	-2.105	0.75911	-4.85625	-3.37325	-2.939	FALSE	FALSE	FALSE	FALSE	FALSE	FALSE	FALSE	FALSE	FALSE	FALSE	FALSE	FALSE	FALSE	FALSE
X	IQSEC2	NP_001104595.1	0.169799	0.174704	-6.048	-4.37808	-3.4355	0.587498	-5.2545	-4.229	-3.722	FALSE	FALSE	TRUE	FALSE	FALSE	FALSE	FALSE	FALSE	FALSE	FALSE	TRUE	TRUE	TRUE	TRUE
21	KRTAP13-3	NP_853653.1	0.0544783	0.0680209	-5.8135	-3.55833	-0.899	0.828591	-4.7337	-3.454	-2.6329	FALSE	FALSE	FALSE	FALSE	FALSE	FALSE	FALSE	FALSE	FALSE	FALSE	FALSE	FALSE	FALSE	FALSE
6	SERPINB9	NP_004146.1	0.0706522	0.069651	-6.055	-3.6027	-2.0015	0.799671	-4.8687	-3.37	-2.76905	FALSE	FALSE	FALSE	FALSE	FALSE	FALSE	TRUE	FALSE	FALSE	FALSE	FALSE	FALSE	FALSE	FALSE
5	PCDHA5	NP_061731.1	0.00688895	0.0416093	-5.294	-3.3668	-1.8085	0.656395	-4.3435	-3.25	-2.5815	FALSE	FALSE	FALSE	FALSE	FALSE	FALSE	FALSE	FALSE	FALSE	FALSE	FALSE	FALSE	FALSE	FALSE
12	DDX51	NP_778236.2	0	0.00020803	-4.6465	-3.2964	-1.879	0.546948	-4.075	-3.25175	-2.5925	FALSE	FALSE	FALSE	FALSE	FALSE	FALSE	FALSE	FALSE	FALSE	TRUE	FALSE	FALSE	FALSE	FALSE
X	PAGE4	NP_001305806.1	0	0	-3.8405	-3.63267	-3.0685	0.104274	-3.7555	-3.6465	-3.502	FALSE	FALSE	FALSE	FALSE	FALSE	FALSE	FALSE	TRUE	FALSE	FALSE	FALSE	FALSE	FALSE	FALSE
6	MSH5	NP_079535.4	0.0385546	0.0913656	-5.7075	-3.77632	-2.1555	0.6343	-4.735	-3.6395	-3.064	FALSE	FALSE	FALSE	FALSE	FALSE	FALSE	FALSE	FALSE	FALSE	FALSE	FALSE	FALSE	FALSE	FALSE
3	CPA3	NP_001861.2	0	0	-4.2985	-3.34443	-1.9155	0.378228	-3.8453	-3.3395	-2.8492	FALSE	FALSE	FALSE	FALSE	FALSE	FALSE	FALSE	FALSE	FALSE	FALSE	FALSE	FALSE	FALSE	FALSE
15	PLIN1	NP_002657.3	0	0.00816156	-4.982	-3.19966	-2.167	0.465245	-3.8975	-3.0685	-2.7293	FALSE	FALSE	FALSE	FALSE	FALSE	FALSE	FALSE	FALSE	FALSE	FALSE	FALSE	FALSE	FALSE	FALSE
1	C1orf43	NP_001092086.1	0	0.0176232	-5.0505	-3.48231	-2.3605	0.425185	-4.0672	-3.421	-3.0013	FALSE	FALSE	FALSE	FALSE	FALSE	FALSE	FALSE	FALSE	FALSE	FALSE	FALSE	FALSE	FALSE	FALSE
4	TDO2	NP_005642.1	0	0.0272028	-4.9635	-3.50189	-2.3875	0.407399	-4.125	-3.344	-3.16315	TRUE	FALSE	FALSE	FALSE	FALSE	FALSE	TRUE	FALSE	FALSE	FALSE	FALSE	FALSE	FALSE	FALSE
5	ABLIM3	NP_001287944.1	0	0.129934	-5.0105	-3.65832	-1.754	0.610935	-4.7515	-3.44	-3.066	FALSE	FALSE	FALSE	FALSE	FALSE	FALSE	TRUE	FALSE	FALSE	FALSE	FALSE	FALSE	FALSE	FALSE
7	AP4M1	NP_004713.2	0	0.0156405	-4.942	-3.38224	-2.264	0.504596	-4.15075	-3.2695	-2.8215	FALSE	TRUE	FALSE	FALSE	FALSE	FALSE	FALSE	FALSE	FALSE	FALSE	TRUE	FALSE	FALSE	TRUE
17	PEMT	NP_009100.2	0	0	-4.134	-3.30828	-1.8195	0.415007	-3.8255	-3.3525	-2.721	FALSE	FALSE	FALSE	FALSE	FALSE	FALSE	TRUE	FALSE	FALSE	FALSE	FALSE	FALSE	FALSE	FALSE
14	PPP2R5C	NP_001155197.1	0.549379	0.0790065	-7.672	-5.1746	-2.5535	1.38089	-6.9485	-5.319	-3.1844	FALSE	FALSE	FALSE	FALSE	FALSE	FALSE	FALSE	FALSE	FALSE	FALSE	FALSE	FALSE	FALSE	TRUE
17	MLLT6	NP_005928.2	0	0.0192027	-4.8255	-3.51911	-2.213	0.471219	-4.32	-3.4035	-3.02	FALSE	FALSE	FALSE	FALSE	FALSE	FALSE	FALSE	FALSE	FALSE	FALSE	FALSE	FALSE	FALSE	FALSE
7	ZNF783	NP_001182149.1	0.0535302	0.0200257	-6.0195	-3.21214	-2.033	0.717746	-4.19515	-3.016	-2.6385	FALSE	FALSE	FALSE	FALSE	FALSE	FALSE	FALSE	FALSE	FALSE	FALSE	FALSE	FALSE	FALSE	FALSE
12	SSH1	NP_061857.3	0.0723372	0.0501996	-6.2005	-3.68657	-1.156	0.718485	-4.8005	-3.443	-3.0455	FALSE	FALSE	FALSE	FALSE	FALSE	FALSE	TRUE	FALSE	FALSE	FALSE	FALSE	FALSE	FALSE	FALSE
5	LNPEP	NP_005566.2	6.03573e-05	0.0360333	-5.058	-3.6992	-2.2995	0.474976	-4.38265	-3.644	-3.1235	FALSE	FALSE	FALSE	FALSE	FALSE	FALSE	TRUE	FALSE	FALSE	FALSE	FALSE	FALSE	FALSE	FALSE
16	GINS2	NP_057179.1	0	0	-4.3645	-3.01823	-1.5715	0.37598	-3.49935	-3.022	-2.54065	FALSE	FALSE	FALSE	FALSE	FALSE	FALSE	FALSE	FALSE	FALSE	FALSE	FALSE	FALSE	FALSE	FALSE
17	RABEP1	NP_004694.2	0	0.0132053	-4.8655	-3.639	-1.9655	0.442062	-4.238	-3.612	-3.0945	FALSE	FALSE	FALSE	FALSE	FALSE	FALSE	TRUE	FALSE	FALSE	FALSE	FALSE	FALSE	FALSE	FALSE
1	NPHP4	NP_055917.1	0	0	-3.8755	-3.2078	-1.895	0.249808	-3.486	-3.2355	-2.865	FALSE	TRUE	FALSE	FALSE	FALSE	FALSE	FALSE	FALSE	FALSE	FALSE	TRUE	FALSE	FALSE	TRUE
3	B3GALNT1	NP_149358.1	0	0	-4.241	-3.65508	-2.4745	0.345761	-4.1155	-3.652	-3.1975	FALSE	FALSE	FALSE	FALSE	FALSE	FALSE	FALSE	FALSE	FALSE	FALSE	FALSE	FALSE	FALSE	FALSE
8	TRAM1	NP_055109.1	0.0232657	0.187261	-5.3265	-3.94933	-1.65	0.71217	-4.8305	-4.036	-2.934	FALSE	FALSE	FALSE	FALSE	FALSE	FALSE	FALSE	FALSE	FALSE	FALSE	FALSE	FALSE	FALSE	FALSE
1	HHAT	NP_001164035.1	0	0	-4.566	-3.44909	-2.401	0.360401	-3.955	-3.4055	-3.009	FALSE	FALSE	FALSE	FALSE	FALSE	FALSE	TRUE	FALSE	FALSE	FALSE	FALSE	FALSE	FALSE	FALSE
19	DPF1	NP_001276907.2	0.0577525	0.0849218	-6.119	-3.90545	-2.8495	0.597687	-4.80455	-3.6985	-3.3055	FALSE	FALSE	FALSE	FALSE	FALSE	FALSE	TRUE	FALSE	FALSE	FALSE	FALSE	FALSE	FALSE	FALSE
11	AASDHPPT	NP_056238.2	0	0.0442377	-4.941	-3.70429	-2.2345	0.510622	-4.4328	-3.6665	-3.0755	FALSE	FALSE	FALSE	FALSE	FALSE	FALSE	FALSE	FALSE	FALSE	FALSE	FALSE	FALSE	FALSE	FALSE
17	OR1D2	NP_002539.2	0.0112906	0.0953622	-5.337	-3.62545	-1.3885	0.737217	-4.6447	-3.621	-2.6538	FALSE	FALSE	FALSE	FALSE	FALSE	FALSE	FALSE	FALSE	FALSE	FALSE	FALSE	FALSE	FALSE	FALSE
3	CMSS1	NP_115735.2	0	0.00119076	-4.6285	-3.65284	-1.9255	0.412878	-4.2459	-3.616	-3.1439	FALSE	FALSE	FALSE	FALSE	FALSE	FALSE	TRUE	FALSE	FALSE	FALSE	FALSE	FALSE	FALSE	FALSE
1	MOB3C	NP_958805.1	0	0	-4.3795	-3.30585	-2.0325	0.513571	-3.994	-3.3265	-2.5973	FALSE	FALSE	FALSE	FALSE	FALSE	FALSE	FALSE	FALSE	FALSE	FALSE	FALSE	FALSE	FALSE	FALSE
8	TRIM55	NP_149047.2	0	0.0310391	-4.935	-3.63549	-2.2205	0.42629	-4.2721	-3.543	-3.184	FALSE	FALSE	FALSE	FALSE	FALSE	FALSE	FALSE	FALSE	FALSE	FALSE	FALSE	FALSE	FALSE	FALSE
17	RFNG	NP_002908.1	0	0	-4.212	-3.2565	-1.225	0.521532	-3.908	-3.3115	-2.514	FALSE	FALSE	FALSE	FALSE	FALSE	FALSE	FALSE	FALSE	FALSE	FALSE	FALSE	FALSE	FALSE	FALSE
3	GNAT1	NP_653082.1	0	0	-4.597	-3.55968	-1.9525	0.450716	-4.1745	-3.54425	-2.973	TRUE	FALSE	FALSE	FALSE	FALSE	FALSE	FALSE	FALSE	FALSE	FALSE	FALSE	FALSE	FALSE	FALSE
5	PCDHGA7	NP_061743.1	0.00224398	0.0218278	-5.2325	-3.32608	-1.9655	0.525884	-4.067	-3.2415	-2.72775	FALSE	FALSE	FALSE	FALSE	FALSE	FALSE	FALSE	FALSE	FALSE	FALSE	FALSE	FALSE	FALSE	FALSE
3	NECTIN3	NP_056295.1	0.169231	0.135547	-5.993	-4.13006	-1.7605	0.818763	-5.2796	-4.0915	-3.0911	FALSE	FALSE	FALSE	FALSE	FALSE	FALSE	FALSE	FALSE	FALSE	FALSE	FALSE	FALSE	FALSE	FALSE
8	RIPK2	NP_003812.1	0	0.027596	-4.898	-3.80892	-2.279	0.456521	-4.44455	-3.7975	-3.212	FALSE	FALSE	FALSE	FALSE	FALSE	FALSE	TRUE	FALSE	FALSE	FALSE	FALSE	FALSE	FALSE	FALSE
7	AOAH	NP_001170977.1	0	0	-3.469	-3.34414	-1.487	0.200305	-3.439	-3.416	-3.148	FALSE	FALSE	FALSE	FALSE	FALSE	FALSE	FALSE	FALSE	FALSE	FALSE	FALSE	FALSE	FALSE	FALSE
19	ZNF557	NP_001037852.1	0.0169606	0.0650155	-5.589	-3.59668	-2.991	0.579071	-4.5015	-3.389	-3.0325	FALSE	FALSE	FALSE	FALSE	FALSE	FALSE	FALSE	FALSE	FALSE	FALSE	FALSE	FALSE	FALSE	FALSE
10	FHIP2A	NP_001128523.1	0	0.0456912	-4.9115	-3.74526	-2.2375	0.549783	-4.48395	-3.74775	-2.9955	FALSE	FALSE	FALSE	FALSE	FALSE	FALSE	FALSE	FALSE	FALSE	FALSE	FALSE	FALSE	FALSE	FALSE
6	HLA-DRB5	NP_002116.2	0.203743	0.147368	-6.6535	-4.09087	0.523	1.14225	-5.4942	-4.206	-2.5862	FALSE	FALSE	FALSE	FALSE	FALSE	FALSE	TRUE	TRUE	FALSE	FALSE	FALSE	FALSE	FALSE	FALSE
X	PRR32	NP_001116188.1	0	0	-4.172	-3.5921	-2.5345	0.185717	-3.7924	-3.618	-3.3495	FALSE	FALSE	FALSE	FALSE	FALSE	FALSE	FALSE	FALSE	FALSE	FALSE	FALSE	FALSE	FALSE	FALSE
16	VAC14	NP_060522.3	0.0463482	0.0797243	-5.9495	-3.65086	-2.821	0.713394	-4.7285	-3.4485	-2.929	FALSE	FALSE	FALSE	FALSE	FALSE	FALSE	TRUE	FALSE	FALSE	FALSE	TRUE	FALSE	FALSE	TRUE
22	DDTL	NP_001077862.1	0.617093	0.0912603	-7.732	-5.54391	-2.454	1.35425	-7.2895	-5.634	-3.636	FALSE	FALSE	FALSE	FALSE	FALSE	FALSE	FALSE	TRUE	FALSE	FALSE	FALSE	FALSE	FALSE	FALSE
11	OR4X2	NP_001004727.1	0.0471195	0.0558321	-5.93	-3.1722	-2.0055	0.892467	-4.643	-2.9	-2.26515	FALSE	FALSE	FALSE	FALSE	FALSE	FALSE	FALSE	FALSE	FALSE	TRUE	FALSE	FALSE	FALSE	FALSE
22	PNPLA3	NP_079501.2	0	0	-3.889	-3.31281	-2.1985	0.300347	-3.6475	-3.371	-2.8758	FALSE	FALSE	FALSE	FALSE	FALSE	FALSE	TRUE	FALSE	FALSE	FALSE	FALSE	FALSE	FALSE	FALSE
2	SULT1C4	NP_006579.2	0	0.0037594	-4.7265	-3.51194	-2.4095	0.431614	-4.1335	-3.466	-2.97785	FALSE	FALSE	FALSE	TRUE	FALSE	FALSE	TRUE	FALSE	FALSE	FALSE	FALSE	FALSE	FALSE	FALSE
3	ACAP2	NP_036419.3	7.13165e-05	0.0484952	-5.0595	-3.89085	-3.01	0.392364	-4.458	-3.835	-3.4255	FALSE	FALSE	FALSE	FALSE	FALSE	FALSE	TRUE	FALSE	FALSE	FALSE	FALSE	FALSE	FALSE	FALSE
21	JAM2	NP_001257337.1	0	0	-4.441	-3.68395	-2.477	0.354935	-4.1747	-3.6725	-3.2233	FALSE	FALSE	FALSE	FALSE	FALSE	FALSE	FALSE	FALSE	FALSE	FALSE	FALSE	FALSE	FALSE	FALSE
X	VBP1	NP_001290472.1	0.443261	0.145726	-6.679	-4.88096	-3.0745	0.896989	-6.106	-4.904	-3.6488	FALSE	FALSE	FALSE	FALSE	FALSE	FALSE	FALSE	FALSE	FALSE	FALSE	FALSE	FALSE	FALSE	FALSE
17	EFCAB13	NP_689560.3	0	0.00620968	-4.7205	-3.78516	-2.5325	0.341903	-4.2697	-3.759	-3.3675	FALSE	FALSE	FALSE	TRUE	FALSE	FALSE	TRUE	FALSE	FALSE	FALSE	FALSE	FALSE	FALSE	FALSE
2	COMMD1	NP_689729.1	0	0	-4.2655	-3.19137	-1.5765	0.381128	-3.68255	-3.185	-2.7175	FALSE	FALSE	FALSE	FALSE	FALSE	FALSE	TRUE	FALSE	FALSE	FALSE	FALSE	FALSE	FALSE	FALSE
7	AEBP1	NP_001120.3	0	0	-4.4855	-3.48454	-2.7115	0.321966	-3.9525	-3.429	-3.12	FALSE	FALSE	FALSE	FALSE	FALSE	FALSE	FALSE	FALSE	FALSE	FALSE	FALSE	FALSE	FALSE	FALSE
11	OR4C12	NP_001005270.3	0.0936252	0.100747	-5.75	-3.62892	-0.702	0.917733	-5.0245	-3.4155	-2.6375	FALSE	FALSE	FALSE	FALSE	FALSE	FALSE	FALSE	FALSE	FALSE	FALSE	FALSE	FALSE	FALSE	FALSE
5	HMMR	NP_001136029.1	0	0	-4.145	-3.49262	-1.6185	0.298611	-3.85615	-3.511	-3.1255	FALSE	FALSE	FALSE	FALSE	FALSE	FALSE	FALSE	FALSE	FALSE	FALSE	FALSE	FALSE	FALSE	FALSE
7	TCAF2	NP_001350467.1	0.000232626	0.255423	-5.09	-4.35468	-3.1605	0.332116	-4.8005	-4.35	-3.9175	FALSE	FALSE	FALSE	FALSE	FALSE	FALSE	FALSE	TRUE	FALSE	FALSE	FALSE	FALSE	FALSE	FALSE
6	H4C5	NP_003536.1	0.245828	0.0994865	-6.456	-3.79552	-0.762	1.46834	-5.7554	-3.83475	-1.7528	FALSE	FALSE	FALSE	FALSE	FALSE	FALSE	FALSE	FALSE	FALSE	FALSE	FALSE	FALSE	FALSE	FALSE
17	MRPL45	NP_115727.5	0	0	-4.072	-3.30327	-1.8045	0.344931	-3.7495	-3.311	-2.8445	FALSE	FALSE	FALSE	FALSE	FALSE	FALSE	FALSE	FALSE	FALSE	FALSE	FALSE	FALSE	FALSE	FALSE
4	ADAD1	NP_001152767.1	0	0.0420608	-4.9385	-3.75622	-1.9555	0.517112	-4.46	-3.7415	-3.0745	FALSE	FALSE	FALSE	FALSE	FALSE	FALSE	TRUE	FALSE	FALSE	FALSE	FALSE	FALSE	FALSE	FALSE
6	GTF2H5	NP_997001.1	0	0	-3.719	-3.45165	-3.0615	0.0972958	-3.5689	-3.453	-3.3267	FALSE	TRUE	FALSE	FALSE	FALSE	FALSE	FALSE	FALSE	FALSE	FALSE	TRUE	FALSE	FALSE	TRUE
17	PFAS	NP_036525.1	0	0	-4.5285	-3.3579	-2.466	0.340661	-3.8465	-3.3045	-2.963	FALSE	FALSE	FALSE	FALSE	FALSE	FALSE	TRUE	FALSE	FALSE	FALSE	FALSE	FALSE	FALSE	FALSE
2	SRD5A2	NP_000339.2	0	0	-4.3865	-3.18481	-2.763	0.271975	-3.6015	-3.094	-2.941	FALSE	TRUE	FALSE	FALSE	FALSE	FALSE	TRUE	FALSE	FALSE	FALSE	FALSE	FALSE	FALSE	FALSE
19	CD22	NP_001762.2	0	0.0367473	-4.9635	-3.48289	-2.2275	0.547641	-4.3125	-3.385	-2.851	FALSE	FALSE	FALSE	FALSE	FALSE	FALSE	FALSE	FALSE	FALSE	FALSE	FALSE	FALSE	FALSE	FALSE
3	CRBN	NP_057386.2	0	0	-4.552	-3.369	-2.2935	0.394686	-3.92665	-3.33	-2.887	FALSE	TRUE	FALSE	FALSE	FALSE	FALSE	TRUE	FALSE	FALSE	FALSE	TRUE	FALSE	FALSE	TRUE
19	ODAD3	NP_659482.3	0	0	-4.165	-3.39193	-2.155	0.237746	-3.6856	-3.3995	-3.098	FALSE	FALSE	FALSE	FALSE	FALSE	FALSE	FALSE	FALSE	FALSE	FALSE	TRUE	FALSE	FALSE	TRUE
16	MCRIP2	NP_001318158.1	0	0	-4.282	-3.08215	-2.7305	0.156883	-3.205	-3.0735	-2.9465	FALSE	FALSE	FALSE	FALSE	FALSE	FALSE	FALSE	FALSE	FALSE	FALSE	FALSE	FALSE	FALSE	FALSE
15	SLC24A1	NP_004718.1	0	0	-4.3215	-3.52385	-2.164	0.310073	-3.9825	-3.486	-3.1615	FALSE	FALSE	FALSE	FALSE	FALSE	FALSE	TRUE	FALSE	FALSE	FALSE	TRUE	FALSE	FALSE	TRUE
12	LRTM2	NP_001034118.1	0.0414532	0.0700202	-5.537	-3.54556	-2.2955	0.684395	-4.685	-3.313	-2.8845	FALSE	FALSE	FALSE	FALSE	FALSE	FALSE	FALSE	FALSE	FALSE	FALSE	FALSE	FALSE	FALSE	FALSE
17	MRPL38	NP_115867.2	0	0.000323887	-4.6675	-3.24983	-2.4515	0.386478	-3.8005	-3.1795	-2.8012	FALSE	FALSE	FALSE	FALSE	FALSE	FALSE	FALSE	FALSE	FALSE	FALSE	FALSE	FALSE	FALSE	FALSE
14	NGB	NP_067080.1	0	0.00194932	-4.8045	-3.45593	-2.076	0.460469	-4.1389	-3.3925	-2.896	FALSE	FALSE	FALSE	FALSE	FALSE	FALSE	FALSE	FALSE	FALSE	FALSE	FALSE	FALSE	FALSE	FALSE
7	ZNF394	NP_115540.2	0.0539153	0.0449294	-5.8625	-3.52888	-2.3635	0.695329	-4.6035	-3.319	-2.85	FALSE	FALSE	FALSE	FALSE	FALSE	FALSE	FALSE	FALSE	FALSE	FALSE	FALSE	FALSE	FALSE	FALSE
19	FAM98C	NP_777565.3	0.00422352	0.0123457	-5.504	-3.36671	-2.188	0.444912	-3.9155	-3.305	-2.8465	FALSE	FALSE	FALSE	FALSE	FALSE	FALSE	FALSE	FALSE	FALSE	FALSE	FALSE	FALSE	FALSE	FALSE
6	PNLDC1	NP_001258791.1	0	0	-4.3145	-3.43818	-1.911	0.398811	-4.0075	-3.418	-2.9365	FALSE	FALSE	FALSE	FALSE	FALSE	FALSE	FALSE	FALSE	FALSE	FALSE	FALSE	FALSE	FALSE	FALSE
8	NTAQ1	NP_060494.1	0.00424448	0.0401811	-5.3525	-3.58705	-2.293	0.502185	-4.29435	-3.53925	-2.99295	FALSE	FALSE	FALSE	FALSE	FALSE	FALSE	FALSE	FALSE	FALSE	FALSE	FALSE	FALSE	FALSE	FALSE
3	SUSD5	NP_056366.1	0	0	-4.3705	-3.41817	-2.05	0.299013	-3.79045	-3.41875	-3.0475	FALSE	FALSE	FALSE	FALSE	FALSE	FALSE	FALSE	FALSE	FALSE	FALSE	FALSE	FALSE	FALSE	FALSE
1	BEST4	NP_695006.1	0.00201396	0.0295381	-5.2055	-3.61055	-2.2055	0.466795	-4.3015	-3.498	-3.109	FALSE	FALSE	FALSE	FALSE	FALSE	FALSE	FALSE	FALSE	FALSE	FALSE	FALSE	FALSE	FALSE	FALSE
8	KCNV1	NP_055194.1	0.0625889	0.233157	-5.31	-4.23795	-2.9005	0.535854	-4.9839	-4.2085	-3.5426	FALSE	FALSE	FALSE	FALSE	FALSE	FALSE	FALSE	FALSE	FALSE	FALSE	FALSE	FALSE	FALSE	FALSE
7	ZNF735	NP_001152996.1	0.0968185	0.0416339	-6.3795	-3.60322	-1.1355	0.884949	-5.01925	-3.292	-2.8315	FALSE	FALSE	FALSE	FALSE	FALSE	FALSE	FALSE	FALSE	FALSE	FALSE	FALSE	FALSE	FALSE	FALSE
13	PDS5B	NP_055847.1	0.00793651	0.101736	-5.1975	-4.02635	-2.7655	0.443792	-4.64375	-4.00775	-3.45425	FALSE	FALSE	FALSE	FALSE	FALSE	FALSE	TRUE	FALSE	FALSE	FALSE	FALSE	FALSE	FALSE	FALSE
9	MFSD14B	NP_115947.2	0.0876354	0.146688	-5.8905	-3.9288	-2.2025	0.792795	-5.00945	-3.90075	-2.86855	FALSE	FALSE	FALSE	FALSE	FALSE	FALSE	FALSE	FALSE	FALSE	FALSE	FALSE	FALSE	FALSE	FALSE
9	IFT74	NP_001092692.1	0	0	-4.451	-3.51685	-2.4885	0.361189	-4.033	-3.48725	-3.0695	FALSE	FALSE	FALSE	FALSE	FALSE	FALSE	FALSE	FALSE	FALSE	FALSE	TRUE	FALSE	FALSE	TRUE
9	MORN5	NP_940871.2	0	0	-4.113	-3.33287	-1.864	0.378946	-3.8045	-3.3755	-2.824	FALSE	FALSE	FALSE	FALSE	FALSE	FALSE	FALSE	FALSE	FALSE	FALSE	FALSE	FALSE	FALSE	FALSE
2	ARL5A	NP_001032251.1	0.0451689	0.10055	-6.7255	-3.67474	-2.732	0.742878	-4.7835	-3.506	-2.831	FALSE	FALSE	FALSE	FALSE	FALSE	FALSE	FALSE	FALSE	FALSE	FALSE	FALSE	FALSE	FALSE	FALSE
19	KIR2DL4	NP_001074239.1	0.00440344	0.0192913	-5.266	-3.18652	-0.7065	0.624233	-4.0801	-3.0745	-2.4909	FALSE	FALSE	FALSE	FALSE	FALSE	FALSE	TRUE	FALSE	FALSE	FALSE	FALSE	FALSE	FALSE	FALSE
8	PNMA2	NP_009188.1	0	0.0181115	-4.917	-3.6428	-2.012	0.462389	-4.296	-3.6055	-3.0665	FALSE	FALSE	FALSE	FALSE	FALSE	FALSE	FALSE	FALSE	FALSE	FALSE	FALSE	FALSE	FALSE	FALSE
9	SIGMAR1	NP_005857.1	0	0	-3.8305	-3.49044	-2.9925	0.126826	-3.64785	-3.4975	-3.322	FALSE	FALSE	FALSE	FALSE	FALSE	FALSE	FALSE	FALSE	FALSE	FALSE	FALSE	FALSE	FALSE	FALSE
1	B3GALNT2	NP_689703.1	0	0	-4.55	-3.58935	-2.3795	0.383443	-4.1215	-3.5845	-3.0879	FALSE	FALSE	FALSE	FALSE	FALSE	FALSE	FALSE	FALSE	FALSE	FALSE	TRUE	FALSE	FALSE	TRUE
17	TBC1D16	NP_061893.2	0.0167832	0.0672801	-5.1935	-3.49058	-1.2125	0.640165	-4.526	-3.246	-2.8615	FALSE	FALSE	FALSE	FALSE	FALSE	FALSE	TRUE	FALSE	FALSE	FALSE	FALSE	FALSE	FALSE	FALSE
15	CCDC32	NP_001369371.1	0	0	-3.96	-3.57828	-2.978	0.148975	-3.7615	-3.5925	-3.3745	FALSE	FALSE	FALSE	FALSE	FALSE	FALSE	FALSE	FALSE	FALSE	FALSE	TRUE	FALSE	FALSE	TRUE
X	ENOX2	NP_872114.1	0.0066237	0.0705335	-5.331	-3.8939	-2.9625	0.46978	-4.542	-3.859	-3.306	FALSE	FALSE	FALSE	FALSE	FALSE	FALSE	FALSE	FALSE	FALSE	FALSE	FALSE	FALSE	FALSE	FALSE
17	ZNF286A	NP_001275575.1	0.0326679	0.0845216	-5.5825	-3.77819	-2.2015	0.607561	-4.68605	-3.62975	-3.102	FALSE	FALSE	FALSE	FALSE	FALSE	FALSE	FALSE	FALSE	FALSE	FALSE	FALSE	FALSE	FALSE	FALSE
19	ZNF317	NP_001177720.1	0.00816156	0.0503296	-5.491	-3.49596	-2.118	0.578732	-4.3734	-3.35	-2.888	FALSE	FALSE	FALSE	FALSE	FALSE	FALSE	FALSE	FALSE	FALSE	FALSE	FALSE	FALSE	FALSE	FALSE
20	BMP7	NP_001710.1	0	0.0511532	-4.9415	-3.71779	-2.584	0.508015	-4.46735	-3.64075	-3.1125	FALSE	FALSE	FALSE	FALSE	FALSE	FALSE	TRUE	FALSE	FALSE	FALSE	FALSE	FALSE	FALSE	FALSE
1	RIMKLA	NP_775913.2	0	0	-4.333	-3.61644	-2.238	0.38208	-4.1289	-3.6245	-3.1155	FALSE	FALSE	FALSE	FALSE	FALSE	FALSE	FALSE	FALSE	FALSE	FALSE	FALSE	FALSE	FALSE	FALSE
1	EDARADD	NP_665860.2	0.00107962	0.0202429	-5.077	-3.52493	-3.0405	0.337624	-3.9771	-3.417	-3.2505	FALSE	TRUE	FALSE	FALSE	FALSE	FALSE	FALSE	FALSE	FALSE	FALSE	FALSE	FALSE	FALSE	FALSE
9	CORO2A	NP_003380.3	0.000236546	0.0324069	-5.075	-3.56706	-2.693	0.457277	-4.2675	-3.407	-3.126	FALSE	FALSE	FALSE	FALSE	FALSE	FALSE	FALSE	FALSE	FALSE	FALSE	FALSE	FALSE	FALSE	FALSE
11	EHD1	NP_001269374.1	0.102585	0.119191	-6.187	-3.90036	-2.152	0.815287	-5.0645	-3.799	-2.8873	FALSE	FALSE	FALSE	FALSE	FALSE	FALSE	FALSE	FALSE	FALSE	FALSE	FALSE	FALSE	FALSE	FALSE
X	MAGEE2	NP_619648.1	0	0	-4.5115	-3.50842	-2.839	0.327211	-4.0088	-3.4275	-3.1561	FALSE	FALSE	FALSE	FALSE	FALSE	FALSE	FALSE	FALSE	FALSE	FALSE	FALSE	FALSE	FALSE	FALSE
2	LYG1	NP_777558.1	0	0	-4.57	-3.42603	-1.686	0.437313	-4.0125	-3.40975	-2.86835	FALSE	FALSE	FALSE	FALSE	FALSE	FALSE	FALSE	FALSE	FALSE	FALSE	FALSE	FALSE	FALSE	FALSE
9	RABL6	NP_078994.3	0.00343423	0.0352208	-5.343	-3.26043	-1.445	0.684571	-4.279	-3.1195	-2.4795	FALSE	FALSE	FALSE	FALSE	FALSE	FALSE	FALSE	FALSE	FALSE	FALSE	TRUE	FALSE	FALSE	TRUE
19	ZNF540	NP_001165697.1	0.0421053	0.0495158	-6.097	-3.64487	-2.0415	0.626607	-4.573	-3.4575	-3.0355	FALSE	FALSE	FALSE	FALSE	FALSE	FALSE	FALSE	FALSE	FALSE	FALSE	FALSE	FALSE	FALSE	FALSE
5	PLAC8L1	NP_001025040.1	0	0	-4.2385	-3.71732	-2.4035	0.337287	-4.1285	-3.772	-3.2378	FALSE	FALSE	FALSE	FALSE	FALSE	FALSE	FALSE	FALSE	FALSE	FALSE	FALSE	FALSE	FALSE	FALSE
8	FBXO32	NP_478136.1	0.000148677	0.097532	-5.0735	-3.96584	-1.6755	0.514559	-4.61075	-4.0225	-3.24975	FALSE	FALSE	FALSE	FALSE	FALSE	FALSE	TRUE	FALSE	FALSE	FALSE	FALSE	FALSE	FALSE	FALSE
3	RAF1	NP_002871.1	0.223337	0.112416	-6.2835	-4.20671	-1.942	0.933194	-5.6197	-4.075	-3.087	TRUE	FALSE	FALSE	FALSE	FALSE	FALSE	FALSE	FALSE	FALSE	FALSE	TRUE	FALSE	FALSE	TRUE
1	KLHL20	NP_055273.2	0.219975	0.135028	-6.3365	-4.33128	-2.4915	0.811315	-5.5299	-4.2255	-3.318	FALSE	FALSE	FALSE	FALSE	FALSE	FALSE	FALSE	FALSE	FALSE	FALSE	FALSE	FALSE	FALSE	FALSE
2	RAD51AP2	NP_001092688.1	0	0.017835	-4.919	-3.57461	-2.209	0.453985	-4.1495	-3.6225	-2.976	FALSE	FALSE	FALSE	FALSE	FALSE	FALSE	FALSE	FALSE	FALSE	FALSE	FALSE	FALSE	FALSE	FALSE
13	TMTC4	NP_116202.2	0	0	-4.1875	-3.5397	-1.953	0.339684	-3.946	-3.593	-3.0585	FALSE	FALSE	FALSE	FALSE	FALSE	FALSE	FALSE	FALSE	FALSE	FALSE	FALSE	FALSE	FALSE	FALSE
22	APOL6	NP_085144.1	0	0	-4.2685	-3.2562	-1.952	0.409684	-3.821	-3.23225	-2.7529	FALSE	FALSE	FALSE	FALSE	FALSE	FALSE	FALSE	FALSE	FALSE	FALSE	FALSE	FALSE	FALSE	FALSE
1	BRDT	NP_001229735.2	0	0.0163531	-4.789	-3.68646	-1.716	0.408939	-4.268	-3.637	-3.1975	FALSE	FALSE	FALSE	FALSE	FALSE	FALSE	TRUE	FALSE	FALSE	FALSE	FALSE	FALSE	FALSE	FALSE
1	PTGFRN	NP_065173.2	0	0.00963583	-4.9015	-3.51675	-1.7925	0.455111	-4.1435	-3.4825	-2.96135	FALSE	FALSE	FALSE	FALSE	FALSE	FALSE	TRUE	FALSE	FALSE	FALSE	FALSE	FALSE	FALSE	FALSE
17	HOXB2	NP_002136.1	0	0.0300998	-5.0225	-3.22088	-2.4865	0.48535	-3.90355	-3.104	-2.7635	FALSE	FALSE	FALSE	FALSE	FALSE	FALSE	FALSE	FALSE	FALSE	FALSE	FALSE	FALSE	FALSE	FALSE
1	PIK3R3	NP_003620.3	0	0.0177507	-4.947	-3.43637	-2.5935	0.513695	-4.20175	-3.33475	-2.854	FALSE	FALSE	FALSE	FALSE	FALSE	FALSE	TRUE	FALSE	FALSE	FALSE	FALSE	FALSE	FALSE	FALSE
3	NIT2	NP_064587.1	0	0.000392773	-4.696	-3.4989	-2.1665	0.441859	-4.087	-3.491	-2.91415	FALSE	FALSE	FALSE	FALSE	FALSE	FALSE	FALSE	FALSE	FALSE	FALSE	FALSE	FALSE	FALSE	FALSE
7	POM121	NP_001244119.1	0	0	-4.2295	-3.44118	-1.6225	0.342009	-3.8505	-3.4845	-2.985	FALSE	FALSE	FALSE	FALSE	FALSE	FALSE	FALSE	FALSE	FALSE	FALSE	FALSE	FALSE	FALSE	FALSE
7	NDUFA5	NP_004991.1	0	0	-4.4775	-3.73858	-1.937	0.390479	-4.2153	-3.784	-3.20685	FALSE	FALSE	FALSE	FALSE	FALSE	FALSE	FALSE	FALSE	FALSE	FALSE	FALSE	FALSE	FALSE	FALSE
16	TBC1D24	NP_001186036.1	0	0	-4.5375	-3.4152	-2.4445	0.37968	-3.977	-3.336	-2.9855	FALSE	TRUE	FALSE	FALSE	FALSE	FALSE	FALSE	FALSE	FALSE	FALSE	TRUE	FALSE	FALSE	TRUE
19	AKAP8L	NP_055186.3	0	0.00446513	-4.867	-3.33967	-2.4365	0.400036	-3.9465	-3.2555	-2.906	FALSE	FALSE	FALSE	FALSE	FALSE	FALSE	FALSE	FALSE	FALSE	FALSE	FALSE	FALSE	FALSE	FALSE
9	NOXA1	NP_006638.1	0	0.00381724	-4.7355	-3.37367	-2.11	0.468165	-4.0526	-3.3095	-2.819	FALSE	FALSE	FALSE	FALSE	FALSE	FALSE	FALSE	FALSE	FALSE	FALSE	FALSE	FALSE	FALSE	FALSE
16	CBLN1	NP_004343.1	0.122152	0.162608	-6.036	-4.17104	-2.2005	0.730995	-5.1365	-4.1755	-3.19875	FALSE	FALSE	FALSE	FALSE	FALSE	FALSE	FALSE	FALSE	FALSE	FALSE	FALSE	FALSE	FALSE	FALSE
10	BCCIP	NP_510868.1	0	0.0634619	-4.804	-3.60116	-1.98	0.662705	-4.5525	-3.5635	-2.7502	FALSE	FALSE	FALSE	FALSE	FALSE	FALSE	FALSE	FALSE	FALSE	FALSE	FALSE	FALSE	FALSE	FALSE
9	SPOUT1	NP_057474.2	0	0.00631579	-4.916	-3.59492	-2.0875	0.435284	-4.1817	-3.5805	-3.0357	FALSE	FALSE	FALSE	FALSE	FALSE	FALSE	FALSE	FALSE	FALSE	FALSE	FALSE	FALSE	FALSE	FALSE
10	ZNF511-PRAP1	NP_001382989.1	0	0	-3.898	-3.18621	-2.367	0.274219	-3.6406	-3.103	-2.903	FALSE	FALSE	FALSE	FALSE	FALSE	FALSE	FALSE	FALSE	FALSE	FALSE	FALSE	FALSE	FALSE	FALSE
9	FAM120AOS	NP_942138.2	0	0	-3.4445	-3.32488	-2.913	0.0623307	-3.3945	-3.3345	-3.245	FALSE	FALSE	FALSE	FALSE	FALSE	FALSE	FALSE	FALSE	FALSE	FALSE	FALSE	FALSE	FALSE	FALSE
21	TIAM1	NP_003244.2	0.00239762	0.0380525	-5.2845	-3.57256	-2.835	0.469678	-4.296	-3.4905	-3.0449	FALSE	FALSE	FALSE	FALSE	FALSE	FALSE	TRUE	FALSE	FALSE	FALSE	FALSE	FALSE	FALSE	FALSE
1	SLC35F3	NP_775779.1	0.0699446	0.138781	-5.64	-3.89662	-2.4415	0.734273	-4.94355	-3.8255	-2.99545	FALSE	FALSE	FALSE	FALSE	FALSE	FALSE	TRUE	FALSE	FALSE	FALSE	FALSE	FALSE	FALSE	FALSE
3	IL17RB	NP_061195.2	0	0	-4.282	-3.48604	-1.838	0.379278	-3.99235	-3.492	-3.0015	FALSE	FALSE	FALSE	FALSE	FALSE	FALSE	TRUE	FALSE	FALSE	FALSE	FALSE	FALSE	FALSE	FALSE
6	MAN1A1	NP_005898.2	0.00950614	0.0818456	-5.365	-3.84907	-2.1025	0.565484	-4.587	-3.8505	-3.099	FALSE	FALSE	FALSE	FALSE	FALSE	FALSE	FALSE	FALSE	FALSE	FALSE	FALSE	FALSE	FALSE	FALSE
1	TRAPPC3	NP_001257823.1	0.00453721	0.0366001	-5.287	-3.75703	-2.722	0.423927	-4.3725	-3.67125	-3.2915	FALSE	FALSE	FALSE	FALSE	FALSE	FALSE	FALSE	FALSE	FALSE	FALSE	FALSE	FALSE	FALSE	FALSE
4	CLOCK	NP_004889.1	0.0701535	0.0997299	-5.8675	-3.89964	-2.6335	0.664576	-4.9035	-3.7475	-3.1615	FALSE	FALSE	FALSE	FALSE	FALSE	FALSE	TRUE	FALSE	FALSE	FALSE	FALSE	FALSE	FALSE	FALSE
8	NCOA2	NP_001308632.1	0.0230311	0.0572687	-5.348	-3.73867	-2.642	0.520112	-4.50115	-3.649	-3.154	FALSE	FALSE	FALSE	FALSE	FALSE	FALSE	TRUE	FALSE	FALSE	FALSE	FALSE	FALSE	FALSE	FALSE
19	ZNF526	NP_597701.1	0	0	-4.2265	-3.30702	-2.211	0.303295	-3.7785	-3.2595	-2.972	FALSE	FALSE	FALSE	FALSE	FALSE	FALSE	FALSE	FALSE	FALSE	FALSE	TRUE	FALSE	FALSE	TRUE
16	TAOK2	NP_057235.2	0.0011542	0.0937789	-5.1255	-3.70262	-2.127	0.557344	-4.5975	-3.54575	-3.114	FALSE	FALSE	FALSE	FALSE	FALSE	FALSE	TRUE	FALSE	FALSE	FALSE	FALSE	FALSE	FALSE	FALSE
14	KLC1	NP_001123579.1	0.0625126	0.162029	-5.6255	-4.11992	-2.6535	0.586154	-4.92165	-4.10425	-3.35385	FALSE	FALSE	FALSE	FALSE	FALSE	FALSE	TRUE	FALSE	FALSE	FALSE	FALSE	FALSE	FALSE	FALSE
12	GNS	NP_002067.1	0.00132482	0.0468505	-5.2005	-3.77188	-2.467	0.483705	-4.43	-3.7535	-3.145	FALSE	TRUE	FALSE	FALSE	FALSE	FALSE	FALSE	FALSE	FALSE	FALSE	TRUE	FALSE	FALSE	TRUE
4	LNX1	NP_001119800.1	0	0	-4.421	-3.48759	-2.4045	0.368578	-3.994	-3.478	-3.00915	FALSE	FALSE	FALSE	FALSE	FALSE	FALSE	TRUE	FALSE	FALSE	FALSE	FALSE	FALSE	FALSE	FALSE
4	MAEA	NP_001017405.1	0.0620155	0.126615	-6.152	-3.82504	-1.469	0.812365	-4.8925	-3.828	-2.7391	FALSE	FALSE	FALSE	FALSE	FALSE	FALSE	TRUE	FALSE	FALSE	FALSE	FALSE	FALSE	FALSE	FALSE
1	ZSCAN20	NP_660281.3	0	7.07414e-05	-4.639	-3.50952	-2.0475	0.368035	-4.03725	-3.4575	-3.08125	FALSE	FALSE	FALSE	FALSE	FALSE	FALSE	FALSE	FALSE	FALSE	FALSE	FALSE	FALSE	FALSE	FALSE
19	TRIM28	NP_005753.1	0.176253	0.0629994	-7.3415	-3.86172	-1.944	1.13827	-5.712	-3.499	-2.7155	FALSE	FALSE	FALSE	FALSE	FALSE	FALSE	FALSE	FALSE	FALSE	TRUE	FALSE	FALSE	FALSE	FALSE
2	PARD3B	NP_689739.4	0	0	-4.208	-3.24507	-2.4045	0.203134	-3.471	-3.245	-3.004	FALSE	FALSE	FALSE	FALSE	FALSE	FALSE	TRUE	FALSE	FALSE	FALSE	FALSE	FALSE	FALSE	FALSE
3	GYG1	NP_004121.2	0	0.0015311	-4.667	-3.3633	-2.425	0.432753	-4.0253	-3.2595	-2.895	FALSE	TRUE	FALSE	FALSE	FALSE	FALSE	FALSE	FALSE	FALSE	FALSE	FALSE	FALSE	FALSE	FALSE
16	PDPR	NP_060460.4	0.0374444	0.0962294	-5.6385	-3.76106	-2.0315	0.673588	-4.74375	-3.66575	-2.9455	FALSE	FALSE	FALSE	FALSE	FALSE	FALSE	TRUE	FALSE	FALSE	FALSE	FALSE	FALSE	FALSE	FALSE
14	TOX4	NP_055643.1	0.10538	0.112062	-5.4795	-4.0525	-1.9095	0.662925	-5.074	-3.958	-3.267	FALSE	FALSE	FALSE	FALSE	FALSE	FALSE	TRUE	FALSE	FALSE	FALSE	FALSE	FALSE	FALSE	FALSE
19	PROSER3	NP_001382387.1	0.0756034	0.0309683	-7.445	-3.70586	-3.09	0.849505	-4.685	-3.3815	-3.106	FALSE	FALSE	FALSE	FALSE	FALSE	FALSE	TRUE	FALSE	FALSE	FALSE	FALSE	FALSE	FALSE	FALSE
6	ZBED9	NP_443155.1	0	0	-4.5125	-3.66593	-2.963	0.225606	-4.0155	-3.5975	-3.4496	FALSE	FALSE	FALSE	FALSE	FALSE	FALSE	TRUE	FALSE	FALSE	FALSE	FALSE	FALSE	FALSE	FALSE
1	CSDE1	NP_001123995.1	0.110311	0.0959079	-6.1895	-4.01479	-1.722	0.737821	-5.1175	-3.8525	-3.214	FALSE	FALSE	FALSE	FALSE	FALSE	FALSE	FALSE	FALSE	FALSE	FALSE	TRUE	FALSE	FALSE	TRUE
2	NABP1	NP_001026886.1	0	0	-4.5395	-3.7706	-2.2235	0.345325	-4.159	-3.82325	-3.2961	FALSE	FALSE	FALSE	FALSE	FALSE	FALSE	FALSE	FALSE	FALSE	FALSE	FALSE	FALSE	FALSE	FALSE
3	CRYGS	NP_060011.1	0	0.0284578	-5.02	-3.6008	-2.3235	0.536611	-4.3725	-3.56925	-2.92335	TRUE	FALSE	FALSE	FALSE	FALSE	FALSE	FALSE	FALSE	FALSE	FALSE	FALSE	FALSE	FALSE	FALSE
2	USP37	NP_065986.3	0.0521966	0.0871575	-5.5645	-3.88171	-1.991	0.607437	-4.80945	-3.7875	-3.1745	FALSE	FALSE	FALSE	FALSE	FALSE	FALSE	TRUE	FALSE	FALSE	FALSE	FALSE	FALSE	FALSE	FALSE
7	SCIN	NP_001106177.1	7.44435e-05	0.00372218	-5.075	-3.14583	-0.902	0.516373	-3.839	-3.1155	-2.503	FALSE	FALSE	FALSE	FALSE	FALSE	FALSE	FALSE	FALSE	FALSE	FALSE	FALSE	FALSE	FALSE	FALSE
11	CEND1	NP_057648.2	0	0	-4.245	-3.24323	-2.0495	0.383632	-3.8202	-3.18525	-2.8035	FALSE	FALSE	FALSE	FALSE	FALSE	FALSE	FALSE	FALSE	FALSE	FALSE	FALSE	FALSE	FALSE	FALSE
19	ZNF614	NP_079316.2	0.0177247	0.0625791	-5.853	-3.51618	-2.4535	0.655319	-4.51915	-3.3535	-2.7832	FALSE	FALSE	FALSE	FALSE	FALSE	FALSE	FALSE	FALSE	FALSE	FALSE	FALSE	FALSE	FALSE	FALSE
7	ZDHHC4	NP_060576.1	0	0	-4.595	-3.43748	-1.6825	0.474741	-4.0686	-3.429	-2.828	FALSE	FALSE	FALSE	FALSE	FALSE	FALSE	FALSE	FALSE	FALSE	FALSE	FALSE	FALSE	FALSE	FALSE
3	ARF4	NP_001651.1	0.241573	0.141632	-6.543	-4.40834	-3.0225	0.798806	-5.57235	-4.3235	-3.3991	FALSE	FALSE	FALSE	FALSE	FALSE	FALSE	FALSE	FALSE	FALSE	FALSE	FALSE	FALSE	FALSE	FALSE
6	MBOAT1	NP_001073949.1	0.010642	0.0434933	-5.5745	-3.65304	-0.8035	0.603891	-4.4135	-3.659	-2.8677	FALSE	FALSE	FALSE	FALSE	FALSE	FALSE	TRUE	FALSE	FALSE	FALSE	FALSE	FALSE	FALSE	FALSE
10	SLC29A3	NP_060814.4	0	0.0259344	-4.7585	-3.51413	-1.2855	0.584667	-4.3605	-3.46075	-2.7885	FALSE	TRUE	FALSE	FALSE	FALSE	FALSE	TRUE	FALSE	FALSE	FALSE	FALSE	FALSE	FALSE	FALSE
19	INSR	NP_000199.2	0.00344468	0.0394136	-5.3105	-3.65609	-2.578	0.457821	-4.3335	-3.558	-3.1485	FALSE	TRUE	FALSE	FALSE	FALSE	FALSE	TRUE	FALSE	FALSE	FALSE	FALSE	FALSE	FALSE	TRUE
19	APBA3	NP_004877.1	0	0.0256018	-4.974	-3.25393	-1.696	0.51216	-4.07035	-3.0505	-2.818	FALSE	FALSE	FALSE	FALSE	FALSE	FALSE	FALSE	FALSE	FALSE	FALSE	FALSE	FALSE	FALSE	FALSE
5	SLC9A3	NP_004165.2	0.03898	0.114536	-5.6505	-3.77406	-1.166	0.704588	-4.7827	-3.7005	-2.9058	FALSE	FALSE	FALSE	FALSE	FALSE	FALSE	TRUE	FALSE	FALSE	FALSE	FALSE	FALSE	FALSE	FALSE
17	TP53	NP_000537.3	0	0.0483226	-5.016	-3.6547	-2.5725	0.569131	-4.47465	-3.593	-2.94035	TRUE	TRUE	TRUE	FALSE	TRUE	TRUE	TRUE	FALSE	FALSE	FALSE	FALSE	FALSE	FALSE	FALSE
10	RTKN2	NP_660350.2	0	0.00993264	-4.942	-3.68014	-2.38	0.430869	-4.2455	-3.681	-3.107	FALSE	FALSE	FALSE	TRUE	FALSE	FALSE	TRUE	FALSE	FALSE	FALSE	FALSE	FALSE	FALSE	FALSE
12	TAS2R14	NP_076411.1	0.00580884	0.103151	-5.184	-3.57973	-1.2485	0.78393	-4.6495	-3.5635	-2.5455	FALSE	FALSE	FALSE	FALSE	FALSE	FALSE	FALSE	FALSE	FALSE	TRUE	FALSE	FALSE	FALSE	FALSE
21	PRDM15	NP_071398.5	0	0	-4.255	-3.44112	-2.4045	0.278229	-3.8315	-3.41	-3.1145	FALSE	FALSE	FALSE	FALSE	FALSE	FALSE	TRUE	FALSE	FALSE	FALSE	TRUE	FALSE	FALSE	TRUE
1	CASP9	NP_001220.2	0	0.0249513	-5.0495	-3.46096	-2.326	0.54475	-4.2725	-3.358	-2.839	FALSE	FALSE	FALSE	FALSE	FALSE	FALSE	TRUE	FALSE	FALSE	FALSE	FALSE	FALSE	FALSE	FALSE
12	METTL7B	NP_689850.2	0	0	-3.894	-3.38555	-2.5365	0.243011	-3.73015	-3.3765	-3.071	FALSE	FALSE	FALSE	FALSE	FALSE	FALSE	FALSE	FALSE	FALSE	FALSE	FALSE	FALSE	FALSE	FALSE
10	HSPA12A	NP_079291.2	0.0111472	0.0605334	-5.187	-3.6355	-2.538	0.555879	-4.481	-3.526	-3.014	FALSE	FALSE	FALSE	FALSE	FALSE	FALSE	TRUE	FALSE	FALSE	FALSE	FALSE	FALSE	FALSE	FALSE
19	IER2	NP_004898.2	0.00154799	0.0154799	-5.081	-3.25143	-2.343	0.48253	-3.9512	-3.1175	-2.7654	FALSE	FALSE	FALSE	FALSE	FALSE	FALSE	FALSE	FALSE	FALSE	FALSE	FALSE	FALSE	FALSE	FALSE
12	CCDC91	NP_060788.3	0.000496524	0.0229643	-5.107	-3.653	-1.775	0.478676	-4.293	-3.64025	-3.04125	FALSE	FALSE	FALSE	FALSE	FALSE	FALSE	TRUE	FALSE	FALSE	FALSE	FALSE	FALSE	FALSE	FALSE
17	AIPL1	NP_055151.3	0	0	-4.2835	-3.4839	-1.9535	0.452118	-4.0665	-3.52575	-2.84975	FALSE	TRUE	FALSE	FALSE	FALSE	FALSE	FALSE	FALSE	FALSE	FALSE	TRUE	FALSE	FALSE	TRUE
6	TAP2	NP_001276972.1	0	0.0285127	-5.0515	-3.59917	-2	0.504989	-4.3227	-3.5345	-2.9918	FALSE	TRUE	FALSE	FALSE	FALSE	FALSE	TRUE	FALSE	FALSE	FALSE	FALSE	FALSE	FALSE	FALSE
1	C8B	NP_000057.3	0	0	-3.744	-3.27586	-1.87	0.263495	-3.6005	-3.297	-2.92855	TRUE	FALSE	FALSE	FALSE	FALSE	FALSE	TRUE	FALSE	FALSE	FALSE	FALSE	FALSE	FALSE	FALSE
2	SGPP2	NP_689599.2	0	0	-4.48	-3.50456	-1.866	0.49756	-4.1174	-3.5785	-2.7884	FALSE	FALSE	FALSE	FALSE	FALSE	FALSE	FALSE	FALSE	FALSE	FALSE	FALSE	FALSE	FALSE	FALSE
9	CD274	NP_054862.1	0.000411184	0.0672286	-5.067	-3.64495	-2.1865	0.558022	-4.452	-3.59225	-2.957	FALSE	FALSE	FALSE	FALSE	FALSE	FALSE	FALSE	FALSE	FALSE	FALSE	FALSE	FALSE	FALSE	FALSE
1	TOMM20	NP_055580.1	0.163831	0.161456	-5.802	-4.10525	-1.831	0.863507	-5.2689	-4.1385	-2.9346	FALSE	FALSE	FALSE	FALSE	FALSE	FALSE	FALSE	FALSE	FALSE	FALSE	FALSE	FALSE	FALSE	FALSE
6	CRIP3	NP_996805.2	0	0.000286041	-4.626	-3.59698	-2.169	0.509479	-4.2465	-3.6585	-2.86025	FALSE	FALSE	FALSE	FALSE	FALSE	FALSE	FALSE	FALSE	FALSE	FALSE	FALSE	FALSE	FALSE	FALSE
11	MICAL2	NP_001269592.1	0	0.00359332	-4.6505	-3.55995	-2.153	0.488913	-4.3925	-3.367	-3.069	FALSE	FALSE	FALSE	FALSE	FALSE	FALSE	TRUE	FALSE	FALSE	FALSE	FALSE	FALSE	FALSE	FALSE
1	SNRNP40	NP_004805.2	0	0.0513033	-5.031	-3.77418	-1.5685	0.57146	-4.4935	-3.818	-2.9895	FALSE	FALSE	FALSE	FALSE	FALSE	FALSE	FALSE	FALSE	FALSE	FALSE	FALSE	FALSE	FALSE	FALSE
14	ADCY4	NP_001185497.1	0	0	-4.3005	-3.517	-2.3805	0.340889	-3.963	-3.5175	-3.0645	FALSE	FALSE	FALSE	FALSE	FALSE	FALSE	FALSE	FALSE	FALSE	FALSE	FALSE	FALSE	FALSE	FALSE
20	WFDC10B	NP_742003.1	0	0.0936842	-4.8435	-3.7082	-2.426	0.527201	-4.5919	-3.5995	-3.1341	FALSE	FALSE	FALSE	FALSE	FALSE	FALSE	FALSE	FALSE	FALSE	FALSE	FALSE	FALSE	FALSE	FALSE
8	ADAM32	NP_659441.4	0	0	-4.3685	-3.65795	-1.564	0.426814	-4.2119	-3.6925	-3.083	FALSE	FALSE	FALSE	FALSE	FALSE	FALSE	FALSE	FALSE	FALSE	FALSE	FALSE	FALSE	FALSE	FALSE
X	BCORL1	NP_001366380.1	0.0180327	0.0184661	-5.3645	-3.74438	-2.953	0.338523	-4.0315	-3.7	-3.4225	FALSE	FALSE	FALSE	FALSE	FALSE	FALSE	FALSE	FALSE	FALSE	FALSE	TRUE	FALSE	FALSE	TRUE
9	MPDZ	NP_001362342.1	0	0	-4.56	-3.1951	-2.297	0.380903	-3.7715	-3.088	-2.8125	FALSE	FALSE	FALSE	FALSE	FALSE	FALSE	FALSE	FALSE	FALSE	TRUE	TRUE	FALSE	FALSE	TRUE
X	UBE2A	NP_003327.2	0.729898	0.138523	-6.6945	-5.43149	-2.795	0.669587	-6.231	-5.52775	-4.49125	FALSE	FALSE	FALSE	FALSE	FALSE	FALSE	TRUE	FALSE	FALSE	FALSE	TRUE	FALSE	FALSE	TRUE
17	ARL17A	NP_001275741.1	0.611598	0.149123	-8.229	-5.60078	-2.227	1.14505	-7.2034	-5.495	-4.2153	FALSE	FALSE	FALSE	FALSE	FALSE	FALSE	FALSE	TRUE	FALSE	FALSE	FALSE	FALSE	FALSE	FALSE
5	TMEM267	NP_071928.2	0	0	-3.981	-3.55653	-2.3315	0.341789	-3.905	-3.645	-3.02135	FALSE	FALSE	FALSE	FALSE	FALSE	FALSE	FALSE	FALSE	FALSE	FALSE	FALSE	FALSE	FALSE	FALSE
16	GCSH	NP_004474.2	0.0649406	0.163413	-5.6475	-3.99856	-2.1785	0.713979	-4.94775	-4.01075	-3.0285	FALSE	TRUE	FALSE	FALSE	FALSE	FALSE	FALSE	FALSE	FALSE	FALSE	TRUE	FALSE	FALSE	TRUE
11	RAD9A	NP_001230153.1	0.00894062	0.0328947	-5.8455	-3.41624	-1.5715	0.607787	-4.2878	-3.30875	-2.725	FALSE	FALSE	FALSE	FALSE	FALSE	FALSE	FALSE	FALSE	FALSE	FALSE	FALSE	FALSE	FALSE	FALSE
19	MYADM	NP_001277119.1	0	0.0593699	-4.9505	-3.52782	-1.79	0.731171	-4.4965	-3.541	-2.526	FALSE	FALSE	FALSE	FALSE	FALSE	FALSE	FALSE	FALSE	FALSE	FALSE	FALSE	FALSE	FALSE	FALSE
17	GOSR2	NP_004278.2	0	0	-4.1295	-3.25179	-2.105	0.343129	-3.7342	-3.2255	-2.8217	FALSE	FALSE	FALSE	FALSE	FALSE	FALSE	TRUE	FALSE	FALSE	FALSE	FALSE	FALSE	FALSE	FALSE
3	WDR48	NP_065890.1	0.000161199	0.0894656	-5.0645	-3.97172	-2.936	0.42848	-4.5855	-3.9275	-3.4295	FALSE	FALSE	FALSE	FALSE	FALSE	FALSE	FALSE	FALSE	FALSE	FALSE	FALSE	FALSE	FALSE	FALSE
17	TNFSF12	NP_003800.1	0	0.000873553	-4.678	-3.42403	-2.4885	0.350421	-3.9305	-3.357	-3.0515	FALSE	FALSE	FALSE	FALSE	FALSE	FALSE	FALSE	FALSE	FALSE	FALSE	FALSE	FALSE	FALSE	FALSE
1	TMEM234	NP_061991.3	0	0	-4.586	-3.73748	-2.714	0.392138	-4.2533	-3.7575	-3.1939	FALSE	FALSE	FALSE	FALSE	FALSE	FALSE	FALSE	FALSE	FALSE	FALSE	FALSE	FALSE	FALSE	FALSE
8	FABP12	NP_001098751.1	0	0.00897593	-4.94	-3.48964	-2.4225	0.461876	-4.137	-3.452	-2.9165	FALSE	FALSE	FALSE	FALSE	FALSE	FALSE	FALSE	FALSE	FALSE	FALSE	FALSE	FALSE	FALSE	FALSE
11	MAPK8IP1	NP_005447.1	0	0.0118	-4.8695	-3.50015	-2.2525	0.469026	-4.21215	-3.39725	-2.97	FALSE	FALSE	FALSE	FALSE	FALSE	FALSE	FALSE	FALSE	FALSE	FALSE	FALSE	FALSE	FALSE	FALSE
4	CXCL3	NP_002081.2	0	0	-4.1415	-3.36291	-1.224	0.520309	-4.02	-3.422	-2.6705	FALSE	FALSE	FALSE	FALSE	FALSE	FALSE	FALSE	FALSE	FALSE	FALSE	FALSE	FALSE	FALSE	FALSE
19	S1PR5	NP_001159687.1	0	0	-4.598	-3.31846	-1.9525	0.524469	-4.0381	-3.2905	-2.644	FALSE	FALSE	FALSE	FALSE	FALSE	FALSE	FALSE	FALSE	FALSE	FALSE	FALSE	FALSE	FALSE	FALSE
19	PAK4	NP_001014831.1	0	0.0156206	-4.8835	-3.46332	-2.701	0.53236	-4.268	-3.34725	-2.872	FALSE	FALSE	FALSE	FALSE	FALSE	FALSE	FALSE	FALSE	FALSE	FALSE	FALSE	FALSE	FALSE	FALSE
14	PRKCH	NP_006246.2	0.0846103	0.126582	-5.677	-3.84634	-2.7975	0.775495	-4.9904	-3.717	-2.8955	FALSE	FALSE	FALSE	FALSE	FALSE	FALSE	TRUE	FALSE	FALSE	FALSE	FALSE	FALSE	FALSE	FALSE
17	EVPLL	NP_001138599.1	0	0	-4.061	-3.25305	-2.423	0.266673	-3.632	-3.229	-2.917	FALSE	FALSE	FALSE	FALSE	FALSE	FALSE	FALSE	FALSE	FALSE	FALSE	FALSE	FALSE	FALSE	FALSE
X	MAGED1	NP_001005333.1	0.108037	0.077662	-6.46	-4.12192	-3.094	0.628696	-5.11345	-3.798	-3.667	FALSE	FALSE	FALSE	FALSE	FALSE	FALSE	FALSE	FALSE	FALSE	FALSE	FALSE	FALSE	FALSE	FALSE
16	TAT	NP_000344.1	0	0	-4.1475	-3.57314	-2.066	0.301584	-3.936	-3.61	-3.1585	FALSE	TRUE	FALSE	FALSE	FALSE	FALSE	FALSE	FALSE	FALSE	FALSE	TRUE	FALSE	FALSE	TRUE
14	GZMB	NP_004122.2	0	0	-4.336	-3.22327	-1.6475	0.516003	-3.9075	-3.227	-2.55455	FALSE	FALSE	FALSE	FALSE	FALSE	FALSE	TRUE	FALSE	FALSE	FALSE	FALSE	FALSE	FALSE	FALSE
11	PTGDR2	NP_004769.2	0	0.0146958	-4.9685	-3.43888	-2.7015	0.458744	-4.1425	-3.29125	-2.97255	FALSE	FALSE	FALSE	FALSE	FALSE	FALSE	FALSE	FALSE	FALSE	FALSE	FALSE	FALSE	FALSE	FALSE
22	USP18	NP_059110.2	0	0.0284449	-4.705	-3.88053	-1.547	0.47228	-4.505	-3.9055	-3.2565	FALSE	FALSE	FALSE	FALSE	FALSE	FALSE	FALSE	FALSE	FALSE	FALSE	TRUE	FALSE	FALSE	TRUE
19	SLC25A23	NP_077008.2	0.0498615	0.1747	-5.4135	-3.97198	-2.0665	0.6892	-4.914	-3.9635	-3.0762	FALSE	FALSE	FALSE	FALSE	FALSE	FALSE	FALSE	FALSE	FALSE	FALSE	FALSE	FALSE	FALSE	FALSE
11	OR56B1	NP_001005180.1	0.0391274	0.0680402	-5.54	-3.5293	-1.2735	0.710814	-4.6455	-3.32625	-2.814	FALSE	FALSE	FALSE	FALSE	FALSE	FALSE	FALSE	FALSE	FALSE	FALSE	FALSE	FALSE	FALSE	FALSE
11	OR52H1	NP_001005289.2	0.0683703	0.091386	-6.0115	-3.58868	-0.525	0.941066	-4.8901	-3.581	-2.3684	FALSE	FALSE	FALSE	FALSE	FALSE	FALSE	FALSE	FALSE	FALSE	FALSE	FALSE	FALSE	FALSE	FALSE
1	DNALI1	NP_003453.3	0	0	-4.3385	-3.45389	-2.396	0.358849	-3.9405	-3.449	-2.9675	FALSE	FALSE	FALSE	FALSE	FALSE	FALSE	TRUE	FALSE	FALSE	FALSE	FALSE	FALSE	FALSE	FALSE
8	VPS28	NP_898880.1	0	0.0134159	-4.8235	-3.61921	-2.4335	0.453665	-4.23775	-3.6005	-3.0305	FALSE	FALSE	FALSE	FALSE	FALSE	FALSE	FALSE	FALSE	FALSE	FALSE	FALSE	FALSE	FALSE	FALSE
1	TXLNA	NP_787048.1	0.180055	0.079409	-6.312	-4.02192	-2.893	0.940531	-5.5755	-3.6765	-3.0195	FALSE	FALSE	FALSE	FALSE	FALSE	FALSE	FALSE	FALSE	FALSE	FALSE	FALSE	FALSE	FALSE	FALSE
8	MAFA	NP_963883.2	0	0	-4.248	-3.23034	-2.5675	0.365017	-3.7918	-3.112	-2.84385	FALSE	FALSE	FALSE	FALSE	FALSE	FALSE	FALSE	FALSE	FALSE	FALSE	FALSE	FALSE	FALSE	FALSE
11	ALDH3B2	NP_001380329.1	0.0361753	0.0841254	-5.455	-3.53597	-0.0175	0.72915	-4.7165	-3.28	-2.841	FALSE	FALSE	FALSE	FALSE	FALSE	FALSE	TRUE	FALSE	FALSE	FALSE	FALSE	FALSE	FALSE	FALSE
17	RAB11FIP4	NP_116321.2	0.00735294	0.0390867	-5.6165	-3.63695	-2.304	0.496369	-4.344	-3.5505	-3.073	FALSE	FALSE	FALSE	FALSE	FALSE	FALSE	FALSE	FALSE	FALSE	FALSE	FALSE	FALSE	FALSE	FALSE
17	SNX11	NP_037455.2	0.0914853	0.0702673	-5.73	-3.83592	-1.8585	0.684436	-5.0077	-3.522	-3.2894	FALSE	FALSE	FALSE	FALSE	FALSE	FALSE	FALSE	FALSE	FALSE	FALSE	FALSE	FALSE	FALSE	FALSE
8	TRPS1	NP_054831.2	0.0286342	0.0263971	-5.443	-3.64279	-2.279	0.47226	-4.214	-3.52725	-3.208	TRUE	FALSE	TRUE	FALSE	FALSE	FALSE	TRUE	FALSE	FALSE	FALSE	TRUE	FALSE	FALSE	TRUE
6	HLA-DQB2	NP_001185787.1	0	0	-4.587	-3.56684	-1.781	0.447037	-4.1104	-3.612	-2.9462	FALSE	FALSE	FALSE	FALSE	FALSE	FALSE	TRUE	FALSE	FALSE	FALSE	FALSE	FALSE	FALSE	FALSE
19	C2CD4C	NP_001129735.1	0	0	-4.2045	-3.1079	-1.411	0.4587	-3.7761	-3.0585	-2.5495	FALSE	FALSE	FALSE	FALSE	FALSE	FALSE	FALSE	FALSE	FALSE	FALSE	FALSE	FALSE	FALSE	FALSE
4	MYL5	NP_002468.1	0	0	-4.5785	-3.1636	-2.162	0.518943	-3.901	-3.10375	-2.509	FALSE	FALSE	FALSE	FALSE	FALSE	FALSE	FALSE	FALSE	FALSE	FALSE	FALSE	FALSE	FALSE	FALSE
11	ZBED5	NP_001137139.1	0	0.00101748	-4.7265	-3.53188	-2.584	0.414209	-4.1205	-3.483	-3.0135	FALSE	FALSE	FALSE	FALSE	FALSE	FALSE	FALSE	FALSE	FALSE	FALSE	FALSE	FALSE	FALSE	FALSE
12	LTBR	NP_002333.1	0.0552757	0.0445732	-5.606	-3.70619	-2.2555	0.59072	-4.61545	-3.569	-3.1065	FALSE	FALSE	FALSE	FALSE	FALSE	FALSE	TRUE	FALSE	FALSE	FALSE	FALSE	FALSE	FALSE	FALSE
2	FAM240C	NP_001369297.1	0	0	-3.421	-3.04275	-2.5295	0.172077	-3.2642	-3.056	-2.8139	FALSE	FALSE	FALSE	FALSE	FALSE	FALSE	FALSE	FALSE	FALSE	FALSE	FALSE	FALSE	FALSE	FALSE
10	CTNNA3	NP_037398.2	0	0.0157835	-4.8275	-3.3503	-1.4175	0.485606	-4.0831	-3.222	-2.8485	FALSE	FALSE	FALSE	FALSE	FALSE	FALSE	FALSE	FALSE	FALSE	FALSE	FALSE	FALSE	FALSE	FALSE
17	HASPIN	NP_114171.2	0	0	-4.483	-3.41885	-1.782	0.470142	-4.0765	-3.363	-2.8359	FALSE	FALSE	FALSE	FALSE	FALSE	FALSE	FALSE	FALSE	FALSE	FALSE	FALSE	FALSE	FALSE	FALSE
X	VSIG1	NP_001164024.1	0.00520312	0.169101	-5.095	-4.06386	-2.5465	0.497448	-4.7792	-4.0105	-3.4566	FALSE	FALSE	FALSE	FALSE	FALSE	FALSE	FALSE	FALSE	FALSE	FALSE	FALSE	FALSE	FALSE	FALSE
[truncated: 16,396 more rows]
